# Supplementary material for: LC8 enhances 53BP1 foci through heterogeneous bridging of 53BP1 oligomers
Source: eLife. 2025 Apr 29;14:e102179. doi: 10.7554/eLife.102179 (PMC12187134; doi:10.7554/eLife.102179)
Supplement: Figure 1—source data 1. [file elife-102179-fig1-data1.xlsx]

## Sheet: CD for OD
Wavelength (nm)	Experimental	Fitted
185	-3.8287	-2.0452
186	-2.7646	-2.2213
187	-2.0674	-2.1281
188	-1.6032	-2.0074
189	-1.7554	-1.7628
190	-1.7978	-1.8552
191	-1.8709	-1.816
192	-1.7304	-1.3441
193	-1.3788	-1.3562
194	-1.0486	-1.2372
195	-0.8771	-1.0267
196	-0.8839	-0.887
197	-0.9249	-0.7921
198	-0.755	-0.6676
199	-0.4077	-0.5217
200	-0.247	-0.3615
201	-0.3962	-0.2456
202	-0.5201	-0.2958
203	-0.4771	-0.471
204	-0.6799	-0.7036
205	-0.9129	-1.112
206	-1.4277	-1.5852
207	-1.9522	-2.0858
208	-2.4807	-2.5667
209	-3.0301	-2.9834
210	-3.5035	-3.3023
211	-3.8516	-3.6602
212	-4.1217	-3.8408
213	-4.2262	-3.9737
214	-4.1058	-4.0581
215	-4.0866	-4.0813
216	-4.0584	-3.9331
217	-4.0767	-3.867
218	-3.9529	-3.7627
219	-3.6529	-3.5799
220	-3.2792	-3.4193
221	-2.9904	-3.2108
222	-2.755	-2.9738
223	-2.4568	-2.7432
224	-2.247	-2.4612
225	-2.004	-2.1805
226	-1.8229	-1.8105
227	-1.5927	-1.6178
228	-1.4229	-1.4642
229	-1.3506	-1.306
230	-1.2506	-1.1473
231	-1.185	-1.0495
232	-0.8692	-0.9107
233	-0.8303	-0.6971
234	-0.6327	-0.5912
235	-0.5793	-0.485
236	-0.5968	-0.366
237	-0.4437	-0.3169
238	-0.3701	-0.2841
239	-0.3031	-0.2417
240	-0.3146	-0.2171
241	-0.3179	-0.1881
242	-0.1464	-0.1324
243	-0.0365	-0.1303
244	0.0203	-0.0999
245	0.0704	-0.0671
246	-0.0412	-0.0511
247	0.0071	-0.0657
248	-0.0371	-0.0451
249	0.0067	-0.0091
250	-0.1933	0.005

## Sheet: SEC-MALS for OD
75 μM	volume (mL)	Molar Mass 1	volume (mL)	RI		187.5 μM	volume (mL)	Molar Mass 1	volume (mL)	RI		375 μM	volume (mL)	Molar Mass 1	volume (mL)	RI		750 μM	volume (mL)	Molar Mass 1	volume (mL)	RI
	12.4261	50469.4	-0.315822	0.0100057			12.492	45829	-0.315822	0.00676656			12.3291	47982.7	7.05123	6.21045e-05			12.3637	48311.6	-0.315822	0.000293495
	12.4312	50411.3	-0.310556	0.00947207			12.4971	46520.4	-0.310556	0.00626498			12.3342	48622.1	7.05649	4.87424e-05			12.3688	48423	-0.310556	0.000212923
	12.4363	50039.8	-0.30529	0.00902508			12.5022	46321.4	-0.30529	0.00581998			12.3394	48490.8	7.06176	3.53803e-05			12.3739	48333.1	-0.30529	9.51064e-05
	12.4414	49569.8	-0.300024	0.00867929			12.5074	46151.3	-0.300024	0.00542482			12.3445	48378.2	7.06702	5.06383e-06			12.379	48199.3	-0.300024	-5.36885e-06
	12.4466	49160.8	-0.294758	0.00846857			12.5125	45944.4	-0.294758	0.00501347			12.3496	48279.1	7.07229	-9.88375e-05			12.3842	48062.4	-0.294758	-6.66664e-05
	12.4517	48788.6	-0.289492	0.00823827			12.5176	45865.2	-0.289491	0.00450589			12.3547	48256.3	7.07756	-0.000136319			12.3893	47886.3	-0.289492	-0.000102265
	12.4568	48440.3	-0.284226	0.00770327			12.5227	45686.4	-0.284225	0.00413165			12.3598	48138.9	7.08282	-0.000120846			12.3944	47799.5	-0.284226	-0.000124317
	12.4619	48344.9	-0.27896	0.00699315			12.5278	45489.1	-0.278959	0.00388954			12.365	48055.1	7.08809	-9.40145e-05			12.3995	47819	-0.27896	-0.000130857
	12.467	48412.9	-0.273694	0.0066263			12.533	45310.1	-0.273693	0.00376299			12.3701	48080	7.09335	-3.00552e-05			12.4046	47787.9	-0.273694	-0.000150628
	12.4722	48421.9	-0.268428	0.00658688			12.5381	45175	-0.268427	0.00369518			12.3752	48017.1	7.09862	2.32901e-06			12.4098	47708.6	-0.268428	-0.000206921
	12.4773	48241.6	-0.263162	0.00663467			12.5432	45029.6	-0.263161	0.00368563			12.3803	48027.8	7.10389	9.79328e-06			12.4149	47552.1	-0.263162	-0.000272928
	12.4824	47809.4	-0.257896	0.00686865			12.5483	44817.5	-0.257895	0.00356821			12.3854	47885.7	7.10915	-2.87976e-06			12.42	47376.5	-0.257896	-0.000317056
	12.4875	47318.2	-0.25263	0.006866			12.5534	44644.9	-0.252629	0.00334998			12.3906	47724.3	7.11442	-1.55528e-05			12.4251	47261.8	-0.25263	-0.000351888
	12.4926	46968.8	-0.247364	0.00686335			12.5586	44482.7	-0.247363	0.00312331			12.3957	47478	7.11968	-2.52257e-05			12.4302	47149	-0.247364	-0.000373974
	12.4978	46658.4	-0.242098	0.00679579			12.5637	44315.9	-0.242097	0.00293553			12.4008	47347.1	7.12495	-2.03717e-05			12.4354	47026	-0.242098	-0.000396398
	12.5029	46365.2	-0.236832	0.00663887			12.5688	44126.5	-0.236831	0.00277588			12.4059	47189	7.13022	-1.92333e-05			12.4405	46894.7	-0.236832	-0.00045453
	12.508	46024.4	-0.231566	0.00655753			12.5739	43981.7	-0.231565	0.00267558			12.411	47082.1	7.13548	-6.55527e-05			12.4456	46749.5	-0.231566	-0.000531627
	12.5131	45666.8	-0.2263	0.00656147			12.579	43822.1	-0.226299	0.00253884			12.4162	46912.9	7.14075	-0.000111872			12.4507	46592.3	-0.2263	-0.000582438
	12.5182	45359.9	-0.221034	0.00652504			12.5842	43693.3	-0.221033	0.00222377			12.4213	46775.4	7.14601	-0.000169677			12.4558	46449.2	-0.221034	-0.000584746
	12.5234	45174.7	-0.215768	0.0064886			12.5893	43533.4	-0.215767	0.00194443			12.4264	46634.1	7.15128	-0.000160877			12.461	46311.3	-0.215768	-0.000557883
	12.5285	44991.7	-0.210502	0.00601925			12.5944	43355.1	-0.210501	0.00181179			12.4315	46543.3	7.15655	-0.000124183			12.4661	46247.2	-0.210502	-0.000519619
	12.5336	44753	-0.205236	0.00574037			12.5995	43189.5	-0.205235	0.00178147			12.4366	46399.7	7.16181	-5.81975e-05			12.4712	46179.4	-0.205236	-0.000504309
	12.5387	44543.6	-0.19997	0.00576637			12.6046	43061.4	-0.199968	0.00179188			12.4418	46241.1	7.16708	4.0077e-05			12.4763	46027.1	-0.19997	-0.000500845
	12.5438	44466.2	-0.194704	0.00593984			12.6098	42928.9	-0.194702	0.00182176			12.4469	46087.8	7.17234	4.57338e-05			12.4814	45867.5	-0.194704	-0.000503517
	12.549	44327.7	-0.189438	0.00619571			12.6149	42772.6	-0.189436	0.00182793			12.452	45951.5	7.17761	4.58529e-05			12.4866	45741.7	-0.189438	-0.000506189
	12.5541	44100.4	-0.184172	0.00635527			12.62	42627.1	-0.18417	0.0017694			12.4571	45841.7	7.18288	3.55043e-05			12.4917	45596.7	-0.184172	-0.000503559
	12.5592	43908.2	-0.178906	0.00642653			12.6251	42496	-0.178904	0.00171087			12.4622	45697.6	7.18814	2.51558e-05			12.4968	45419.2	-0.178906	-0.000492664
	12.5643	43710.1	-0.17364	0.00641913			12.6302	42387.4	-0.173638	0.00161459			12.4674	45520.5	7.19341	2.40626e-05			12.5019	45343.9	-0.17364	-0.00050292
	12.5694	43541.3	-0.168374	0.00641173			12.6354	42259.7	-0.168372	0.00156194			12.4725	45370.7	7.19867	8.56853e-06			12.507	45247.9	-0.168375	-0.000513176
	12.5746	43339	-0.163108	0.00643624			12.6405	42119.1	-0.163106	0.00155996			12.4776	45301.7	7.20394	-6.92555e-06			12.5122	45173.8	-0.163109	-0.000538911
	12.5797	43179.1	-0.157842	0.0064655			12.6456	41977	-0.15784	0.00152599			12.4827	45259.8	7.20921	-4.33768e-05			12.5173	45044.7	-0.157843	-0.000568097
	12.5848	43004.1	-0.152576	0.00638633			12.6507	41841.1	-0.152574	0.00132385			12.4878	45168	7.21447	-0.000128015			12.5224	44911.9	-0.152577	-0.000550067
	12.5899	42781.6	-0.14731	0.00630716			12.6558	41718.6	-0.147308	0.00110221			12.493	45069.3	7.21974	-0.000137791			12.5275	44723.3	-0.147311	-0.000508208
	12.595	42548.6	-0.142044	0.00613568			12.661	41584.5	-0.142042	0.000990012			12.4981	44984.1	7.225	-8.30366e-05			12.5326	44589	-0.142045	-0.000465878
	12.6002	42368.3	-0.136778	0.00586609			12.6661	41466.8	-0.136776	0.000990948			12.5032	44860.2	7.23027	-1.93468e-05			12.5378	44469.1	-0.136779	-0.000415944
	12.6053	42210.8	-0.131512	0.00585427			12.6712	41326.2	-0.13151	0.00105186			12.5083	44730.9	7.23553	5.40051e-05			12.5429	44375.7	-0.131513	-0.000398762
	12.6104	42126.9	-0.126246	0.00601293			12.6763	41206	-0.126244	0.00119647			12.5134	44650.5	7.2408	7.94031e-05			12.548	44252	-0.126247	-0.000395233
	12.6155	42114.4	-0.12098	0.00631132			12.6814	41101.9	-0.120978	0.0012269			12.5186	44544.7	7.24607	7.75937e-05			12.5531	44165.2	-0.120981	-0.000393722
	12.6206	42075.3	-0.115714	0.00673046			12.6866	41036.6	-0.115712	0.00123563			12.5237	44373.1	7.25133	7.57843e-05			12.5582	44064.7	-0.115715	-0.000392211
	12.6258	42028.4	-0.110448	0.00684431			12.6917	40947.1	-0.110445	0.00121004			12.5288	44296.5	7.2566	7.06682e-05			12.5634	43954.3	-0.110449	-0.00038982
	12.6309	41943.9	-0.105182	0.00685789			12.6968	40857.2	-0.105179	0.00118445			12.5339	44215.7	7.26186	5.92117e-05			12.5685	43851.5	-0.105183	-0.000390173
	12.636	41802	-0.0999164	0.00687146			12.7019	40725.6	-0.0999134	0.00118346			12.539	44073.2	7.26713	5.80402e-05			12.5736	43729.6	-0.0999168	-0.000390525
	12.6411	41571.7	-0.0946504	0.00690044			12.707	40574	-0.0946473	0.00122349			12.5442	43891	7.2724	5.68688e-05			12.5787	43616.8	-0.0946509	-0.000409622
	12.6462	41342.5	-0.0893844	0.00692793			12.7122	40437.7	-0.0893813	0.00118363			12.5493	43809.4	7.27766	3.88587e-05			12.5838	43485.7	-0.0893849	-0.000452291
	12.6514	41144.2	-0.0841184	0.00696258			12.7173	40290.7	-0.0841152	0.00114377			12.5544	43701.4	7.28293	-4.98627e-05			12.589	43387.6	-0.0841189	-0.000452144
	12.6565	40959.4	-0.0788524	0.00694107			12.7224	40151.4	-0.0788491	0.0010621			12.5595	43719.5	7.28819	-6.77642e-05			12.5941	43288.3	-0.0788529	-0.000421375
	12.6616	40788.4	-0.0735864	0.00691956			12.7275	40019.7	-0.0735831	0.000993764			12.5646	43726.9	7.29346	-5.33298e-05			12.5992	43177.9	-0.073587	-0.000380596
	12.6667	40618.9	-0.0683205	0.00657005			12.7326	39891.3	-0.068317	0.00104693			12.5698	43747.1	7.29873	-1.50477e-05			12.6043	43054.7	-0.068321	-0.000324237
	12.6718	40465	-0.0630545	0.00644784			12.7378	39752.4	-0.063051	0.0011913			12.5749	43662	7.30399	6.38069e-05			12.6094	42945.5	-0.063055	-0.000305265
	12.677	40315.8	-0.0577885	0.00657464			12.7429	39612.7	-0.0577849	0.00139667			12.58	43534.2	7.30926	0.000100478			12.6146	42871.8	-0.0577891	-0.000300699
	12.6821	40175.5	-0.0525225	0.00679851			12.748	39486.9	-0.0525188	0.00163346			12.5851	43369	7.31452	0.000113664			12.6197	42772.7	-0.0525231	-0.000296132
	12.6872	40095.3	-0.0472565	0.00716256			12.7531	39382.3	-0.0472528	0.00174012			12.5902	43223.2	7.31979	0.000114756			12.6248	42666.9	-0.0472571	-0.000290014
	12.6923	40031.4	-0.0419905	0.00730173			12.7582	39287.2	-0.0419867	0.0017399			12.5954	43077.2	7.32506	0.000112913			12.6299	42591	-0.0419911	-0.000286067
	12.6974	39951.4	-0.0367245	0.00735155			12.7634	39161.4	-0.0367207	0.00175577			12.6005	42990.8	7.33032	0.000111071			12.635	42516.5	-0.0367252	-0.000288487
	12.7026	39835.3	-0.0314586	0.00732707			12.7685	39030.2	-0.0314546	0.00180622			12.6056	42859.5	7.33559	0.000112286			12.6402	42418.8	-0.0314592	-0.000290906
	12.7077	39699.5	-0.0261926	0.00730258			12.7736	38895.8	-0.0261885	0.00187662			12.6107	42723.5	7.34085	0.000107315			12.6453	42294.8	-0.0261932	-0.000302567
	12.7128	39531.7	-0.0209266	0.0072478			12.7787	38760.3	-0.0209225	0.00191535			12.6158	42563.6	7.34612	0.000102343			12.6504	42181.4	-0.0209272	-0.000350427
	12.7179	39368.7	-0.0156606	0.00720619			12.7838	38641.1	-0.0156564	0.00191292			12.621	42420.8	7.35139	1.52672e-06			12.6555	42071.8	-0.0156613	-0.000372306
	12.723	39193.1	-0.0103946	0.00716458			12.789	38531.5	-0.0103904	0.00191048			12.6261	42310.2	7.35665	-5.7971e-05			12.6606	41979.3	-0.0103953	-0.000355674
	12.7282	39028	-0.00512863	0.00707981			12.7941	38424.6	-0.00512431	0.00177395			12.6312	42220	7.36192	-4.95031e-05			12.6658	41851.4	-0.00512931	-0.000321582
	12.7333	38873.1	0.000137354	0.0065475			12.7992	38327	0.00014175	0.00175616			12.6363	42111.7	7.36718	-1.08599e-05			12.6709	41730.5	0.000136667	-0.000282351
	12.7384	38734.7	0.00540334	0.0062354			12.8043	38220.3	0.00540781	0.00186186			12.6414	41996.4	7.37245	4.25445e-05			12.676	41600.6	0.00540264	-0.000266726
	12.7435	38615.7	0.0106693	0.00622116			12.8094	38123.7	0.0106739	0.00203187			12.6466	41861.1	7.37772	0.000141205			12.6811	41509.2	0.0106686	-0.000264665
	12.7486	38487.6	0.0159353	0.00642468			12.8146	38038.5	0.0159399	0.00225081			12.6517	41721	7.38298	0.000141407			12.6862	41400.3	0.0159346	-0.000266733
	12.7538	38339.5	0.0212013	0.00676783			12.8197	37988	0.021206	0.00228246			12.6568	41597.7	7.38825	0.000136835			12.6914	41305.7	0.0212006	-0.000268801
	12.7589	38181.3	0.0264673	0.00710869			12.8248	37915.6	0.026472	0.00229701			12.6619	41478.5	7.39351	0.000132262			12.6965	41187	0.0264665	-0.000269299
	12.764	38066.2	0.0317333	0.00707175			12.8299	37817.7	0.0317381	0.00227564			12.667	41353.8	7.39878	0.000131538			12.7016	41080.3	0.0317325	-0.000262203
	12.7691	37953.5	0.0369993	0.00703481			12.835	37713.1	0.0370042	0.00225427			12.6722	41224.8	7.40404	0.000125871			12.7067	40949.4	0.0369985	-0.000273741
	12.7742	37832.4	0.0422652	0.00695773			12.8402	37614.5	0.0422702	0.00221635			12.6773	41104.6	7.40931	0.000107445			12.7118	40842.4	0.0422645	-0.000285279
	12.7794	37717.8	0.0475312	0.00686657			12.8453	37507.2	0.0475363	0.00217278			12.6824	41002.9	7.41458	8.90197e-05			12.717	40734.2	0.0475304	-0.000309966
	12.7845	37613.9	0.0527972	0.00685422			12.8504	37416.2	0.0528023	0.0021292			12.6875	40905.5	7.41984	4.63773e-05			12.7221	40636.2	0.0527964	-0.000351881
	12.7896	37546	0.0580632	0.00682527			12.8555	37357.1	0.0580684	0.00203322			12.6926	40821	7.42511	-3.90773e-05			12.7272	40544.2	0.0580624	-0.000346801
	12.7947	37477.9	0.0633292	0.00679632			12.8606	37286.3	0.0633345	0.00176733			12.6978	40713.9	7.43037	-5.0832e-05			12.7323	40436.8	0.0633284	-0.000316642
	12.7998	37404.2	0.0685952	0.00634703			12.8658	37218.1	0.0686005	0.00166779			12.7029	40596.6	7.43564	-2.42162e-05			12.7374	40308.1	0.0685943	-0.000282725
	12.805	37275.8	0.0738612	0.00601494			12.8709	37161.4	0.0738666	0.0017083			12.708	40501.5	7.44091	2.57207e-05			12.7426	40178	0.0738603	-0.000240318
	12.8101	37135	0.0791271	0.0060327			12.876	37186.2	0.0791326	0.00175149			12.7131	40406.5	7.44617	0.000112294			12.7477	40074.7	0.0791263	-0.000241869
	12.8152	37009.6	0.0843931	0.00616646			12.8811	37228.4	0.0843987	0.00186486			12.7182	40324.8	7.45144	0.000114332			12.7528	39976.2	0.0843923	-0.00024342
	12.8203	36891.4	0.0896591	0.00638786			12.8862	37276.3	0.0896648	0.00186654			12.7234	40226.3	7.4567	0.000110713			12.7579	39897	0.0896582	-0.000248937
	12.8254	36800.6	0.0949251	0.00674251			12.8914	37245	0.0949308	0.00184425			12.7285	40134.2	7.46197	0.000107095			12.763	39837.9	0.0949242	-0.000264456
	12.8306	36784.8	0.100191	0.00677805			12.8965	37120.1	0.100197	0.00182196			12.7336	40029.2	7.46724	0.000103355			12.7682	39773.4	0.10019	-0.000266321
	12.8357	36790.4	0.105457	0.00678226			12.9016	37015.4	0.105463	0.0017448			12.7387	39907.7	7.4725	8.90414e-05			12.7733	39692.7	0.105456	-0.000270486
	12.8408	36777.7	0.110723	0.0067467			12.9067	36984.9	0.110729	0.00172854			12.7438	39772.9	7.47777	8.63864e-05			12.7784	39583.2	0.110722	-0.000274652
	12.8459	36662.9	0.115989	0.00671114			12.9118	36952.3	0.115995	0.00171656			12.749	39649.1	7.48303	5.62824e-05			12.7835	39464.9	0.115988	-0.000296797
	12.851	36537.9	0.121255	0.00672322			12.917	36876.3	0.121261	0.00170459			12.7541	39526.4	7.4883	2.61785e-05			12.7886	39353.2	0.121254	-0.000343205
	12.8562	36435.3	0.126521	0.00673674			12.9221	36681.6	0.126527	0.00164941			12.7592	39416.1	7.49357	-6.07206e-05			12.7938	39252	0.12652	-0.000347279
	12.8613	36314.8	0.131787	0.0066804			12.9272	36531.5	0.131793	0.00146273			12.7643	39313.8	7.49883	-0.000113021			12.7989	39155.1	0.131786	-0.000317886
	12.8664	36270	0.137053	0.00662406			12.9323	36428.9	0.137059	0.00132843			12.7694	39217.5	7.5041	-0.0001052			12.804	39025.7	0.137052	-0.000276924
	12.8715	36263	0.142319	0.00625111			12.9374	36360.2	0.142325	0.001302			12.7746	39088.7	7.50936	-4.81429e-05			12.8091	38899.4	0.142318	-0.000220151
	12.8766	36271.4	0.147585	0.00612819			12.9426	36253.8	0.147591	0.00137536			12.7797	38979.5	7.51463	2.40492e-05			12.8142	38801.3	0.147584	-0.000203936
	12.8818	36330.4	0.152851	0.00617022			12.9477	36141.2	0.152857	0.00150801			12.7848	38902	7.5199	5.86817e-05			12.8194	38711.6	0.15285	-0.00020244
	12.8869	36413.1	0.158117	0.00634			12.9528	36012.2	0.158124	0.00165044			12.7899	38842.8	7.52516	7.54383e-05			12.8245	38627.5	0.158116	-0.000200944
	12.892	36531.1	0.163383	0.00676211			12.9579	35890.4	0.16339	0.00164005			12.795	38776.9	7.53043	7.16247e-05			12.8296	38541.4	0.163382	-0.00020059
	12.8971	36637.8	0.168649	0.00692035			12.963	35777.5	0.168656	0.00162966			12.8002	38666.8	7.53569	6.7811e-05			12.8347	38428.4	0.168648	-0.000193006
	12.9022	36654.3	0.173915	0.00690202			12.9682	35674.6	0.173922	0.00160385			12.8053	38561	7.54096	6.38949e-05			12.8398	38315	0.173914	-0.000188319
	12.9074	36624.8	0.179181	0.00688368			12.9733	35576.2	0.179188	0.00158731			12.8104	38449.4	7.54623	7.90837e-05			12.845	38206	0.17918	-0.000194213
	12.9125	36508.8	0.184447	0.00684238			12.9784	35503.3	0.184454	0.00159172			12.8155	38337.4	7.55149	5.26879e-05			12.8501	38086.7	0.184446	-0.000200106
	12.9176	36409.2	0.189713	0.00678263			12.9835	35408.1	0.18972	0.00154546			12.8206	38227.4	7.55676	2.62921e-05			12.8552	37971	0.189712	-0.000242232
	12.9227	36340.4	0.194979	0.00678648			12.9886	35292.5	0.194986	0.0014992			12.8258	38109	7.56202	-2.66723e-05			12.8603	37863.3	0.194978	-0.000252978
	12.9278	36291.4	0.200245	0.00677113			12.9938	35200.2	0.200252	0.00140812			12.8309	37998.8	7.56729	-9.22531e-05			12.8654	37746.9	0.200244	-0.00022728
	12.933	36285.3	0.205511	0.00675579			12.9989	35094.6	0.205518	0.00126285			12.836	37892.4	7.57255	-8.62847e-05			12.8706	37625.9	0.20551	-0.000189519
	12.9381	36356.5	0.210777	0.00635922			13.004	35014.5	0.210784	0.00126818			12.8411	37795.4	7.57782	-3.57968e-05			12.8757	37545.3	0.210776	-0.000139824
	12.9432	36311.7	0.216043	0.00609055			13.0091	34965.6	0.21605	0.00134763			12.8462	37713.3	7.58309	2.18772e-05			12.8808	37441.6	0.216042	-9.47977e-05
	12.9483	36117.2	0.221309	0.00611968			13.0142	34943	0.221316	0.00149148			12.8514	37646.4	7.58835	5.80256e-05			12.8859	37335.2	0.221308	-9.46276e-05
	12.9534	35873.1	0.226575	0.00637044			13.0194	34936.1	0.226582	0.00169372			12.8565	37580.4	7.59362	7.56267e-05			12.891	37225.2	0.226574	-9.44574e-05
	12.9586	35677.8	0.231841	0.0067788			13.0245	34904.8	0.231848	0.00172749			12.8616	37478.2	7.59888	6.95616e-05			12.8962	37104.8	0.23184	-9.49421e-05
	12.9637	35526.9	0.237107	0.00711631			13.0296	34819.2	0.237114	0.00174092			12.8667	37393.2	7.60415	6.34964e-05			12.9013	37004.6	0.237106	-9.79811e-05
	12.9688	35484.5	0.242373	0.00711593			13.0347	34765.4	0.24238	0.00175436			12.8718	37276.7	7.60942	5.01857e-05			12.9064	36900.3	0.242371	-9.59489e-05
	12.9739	35463.4	0.247639	0.00711555			13.0398	34723.4	0.247647	0.00176306			12.877	37170.1	7.61468	4.62207e-05			12.9115	36803	0.247637	-9.72125e-05
	12.979	35391.8	0.252905	0.00708939			13.045	34684.1	0.252913	0.00176292			12.8821	37088	7.61995	4.52082e-05			12.9166	36709	0.252903	-9.84761e-05
	12.9842	35270.2	0.258171	0.00698896			13.0501	34646.6	0.258179	0.00178007			12.8872	37022.9	7.62521	4.41957e-05			12.9218	36612.9	0.258169	-0.0001452
	12.9893	35565.7	0.263437	0.00695109			13.0552	34612.4	0.263445	0.00176726			12.8923	36950.4	7.63048	3.78468e-06			12.9269	36527.2	0.263435	-0.000172506
	12.9944	36737.6	0.268703	0.00687302			13.0603	34537.1	0.268711	0.00175445			12.8974	36847.6	7.63575	-7.72391e-05			12.932	36461.1	0.268701	-0.00016597
	12.9995	39748.6	0.273969	0.00679494			13.0654	34482.4	0.273977	0.00158775			12.9026	36771.9	7.64101	-9.79287e-05			12.9371	36366.9	0.273967	-0.000131322
	13.0046	43711.5	0.279235	0.006584			13.0706	34368.6	0.279243	0.0015626			12.9077	36729.4	7.64628	-5.99319e-05			12.9422	36274.6	0.279233	-8.09007e-05
	13.0098	43213.2	0.284501	0.00622291			13.0757	34296.7	0.284509	0.00164547			12.9128	36667.2	7.65154	6.57879e-06			12.9474	36169.5	0.284499	-2.82214e-05
	13.0149	41642.7	0.289767	0.00620674			13.0808	34207.3	0.289775	0.0017709			12.9179	36573.8	7.65681	0.000109694			12.9525	36077.1	0.289765	-2.19738e-05
	13.02	41385.6	0.295033	0.00638316			13.0859	34147.4	0.295041	0.00198358			12.923	36515.8	7.66208	0.000125728			12.9576	35998.9	0.295031	-1.93457e-05
	13.0251	41788.6	0.300299	0.00666866			13.091	34066.6	0.300307	0.00216072			12.9282	36476.5	7.66734	0.00013183			12.9627	35909.1	0.300297	-1.84302e-05
	13.0302	42089.1	0.305565	0.00681447			13.0962	34005.4	0.305573	0.00216304			12.9333	36395.7	7.67261	0.000127125			12.9678	35818.5	0.305563	-1.83711e-05
	13.0354	41927.8	0.310831	0.00688009			13.1013	33903.3	0.310839	0.00216176			12.9384	36297.4	7.67787	0.00012242			12.973	35722.5	0.310829	-1.83119e-05
	13.0405	41363	0.316097	0.00683847			13.1064	33864.4	0.316105	0.00215274			12.9435	36234.1	7.68314	0.00011242			12.9781	35634.9	0.316095	-2.78897e-05
	13.0456	40428.5	0.321362	0.00679685			13.1115	33801.2	0.321371	0.00214373			12.9486	36146.5	7.68841	0.00011281			12.9832	35540	0.321361	-3.74674e-05
	13.0507	39293.6	0.326628	0.00672875			13.1166	33721.3	0.326637	0.00215781			12.9538	36096	7.69367	0.000101653			12.9883	35442.3	0.326627	-6.0478e-05
	13.0558	37947	0.331894	0.00673869			13.1218	33667.1	0.331903	0.00215277			12.9589	36015.9	7.69894	9.04972e-05			12.9934	35362.8	0.331893	-0.000107196
	13.061	37066.1	0.33716	0.00669688			13.1269	33584.6	0.33717	0.00214773			12.964	35937.5	7.7042	-2.19513e-06			12.9986	35270.1	0.337159	-0.00010383
	13.0661	36418.1	0.342426	0.00665508			13.132	33493.5	0.342436	0.00196002			12.9691	35869.7	7.70947	-4.69887e-05			13.0037	35191.5	0.342425	-7.14688e-05
	13.0712	35889.4	0.347692	0.00649719			13.1371	33429.8	0.347702	0.00188269			12.9742	35780.1	7.71474	-2.11387e-05			13.0088	35123.1	0.347691	-3.56151e-05
	13.0763	35346.2	0.352958	0.00605845			13.1422	33498	0.352968	0.00194193			12.9794	35683	7.72	3.42643e-05			13.0139	35057.5	0.352957	1.15333e-05
	13.0814	34858.4	0.358224	0.00593676			13.1474	33675.5	0.358234	0.00204704			12.9845	35578.9	7.72527	0.000117279			13.019	35023.1	0.358223	2.13259e-05
			0.36349	0.00607484			13.1525	33914.9	0.3635	0.00222736			12.9896	35515.9	7.73053	0.000151833			13.0242	35044.2	0.363489	2.30961e-05
			0.368756	0.00627969			13.1576	34111	0.368766	0.0024182			12.9947	35495.3	7.7358	0.000150335			13.0293	35000.3	0.368755	2.27957e-05
			0.374022	0.0066161			13.1627	34035.6	0.374032	0.0024231			12.9998	35514.3	7.74106	0.000148837			13.0344	34922.2	0.374021	2.24953e-05
			0.379288	0.00667438			13.1678	33828.4	0.379298	0.00242198			13.005	35488.5	7.74633	0.000143701			13.0395	34841.8	0.379287	2.14918e-05
			0.384554	0.00668958			13.173	33648.2	0.384564	0.00242085			13.0101	35417.1	7.7516	0.000134241			13.0446	34762.3	0.384553	2.08416e-05
			0.38982	0.00662388			13.1781	33533.6	0.38983	0.00243353			13.0152	35352.5	7.75686	0.000133682			13.0498	34664.4	0.389819	2.01914e-05
			0.395086	0.00655817			13.1832	33431	0.395096	0.00246775			13.0203	35298.3	7.76213	0.000121587			13.0549	34617.3	0.395085	5.60054e-06
			0.400352	0.00654868			13.1883	33346.8	0.400362	0.00242454			13.0254	35211.8	7.76739	0.000109492			13.06	34532.8	0.400351	-4.898e-05
			0.405618	0.00653675			13.1934	33276.3	0.405628	0.00238132			13.0306	35139	7.77266	4.77576e-06			13.0651	34437.5	0.405617	-6.81164e-05
			0.410884	0.00652481			13.1986	33224.8	0.410894	0.002296			13.0357	35071.6	7.77793	-4.67786e-05			13.0702	34363.8	0.410883	-5.03643e-05
			0.41615	0.00641999			13.2037	33159.1	0.41616	0.00215784			13.0408	34981.2	7.78319	-3.36891e-05			13.0754	34304.7	0.416149	-2.12965e-05
			0.421416	0.00601424			13.2088	33092.9	0.421426	0.00217762			13.0459	34889.4	7.78846	1.53217e-05			13.0805	34255.3	0.421415	2.3584e-05
			0.426682	0.00577423			13.2139	32910.2	0.426693	0.00228074			13.051	34790.5	7.79372	8.71145e-05			13.0856	34181.8	0.426681	4.09668e-05
			0.431948	0.00580372					0.431959	0.00240409			13.0562	34677.1	7.79899	0.000162088			13.0907	34168.4	0.431947	4.61424e-05
			0.437214	0.00598845					0.437225	0.0025777			13.0613	34605.9	7.80426	0.00016619			13.0958	34081.7	0.437213	4.29436e-05
			0.44248	0.00627713					0.442491	0.00256831			13.0664	34548.2	7.80952	0.000165256			13.101	34019.9	0.442479	3.97447e-05
			0.447746	0.00641372					0.447757	0.00255892			13.0715	34529.9	7.81479	0.000164323			13.1061	33931.7	0.447744	3.40524e-05
			0.453012	0.00643718					0.453023	0.0025273			13.0766	34452.3	7.82005	0.000170196			13.1112	33852.4	0.45301	3.4771e-05
			0.458278	0.00641221					0.458289	0.0025177			13.0818	34384.7	7.82532	0.000195122			13.1163	33749	0.458276	3.04578e-05
			0.463544	0.00638724					0.463555	0.00252672			13.0869	34311.1	7.83059	0.00019033			13.1214	33646.3	0.463542	2.61446e-05
			0.46881	0.00631989					0.468821	0.00251247			13.092	34267.6	7.83585	0.000185539			13.1266	33601.9	0.468808	-2.38626e-05
			0.474076	0.00623009					0.474087	0.00249821			13.0971	34228	7.84112	0.000155259			13.1317	33572.7	0.474074	-4.2427e-05
			0.479342	0.00617871					0.479353	0.00242759			13.1022	34222.9	7.84638	0.000102025			13.1368	33498.1	0.47934	-3.20479e-05
			0.484608	0.00612734					0.484619	0.00224852			13.1074	34143.3	7.85165	0.000134237			13.1419	33423	0.484606	-1.17291e-05
			0.489874	0.00564822					0.489885	0.00217292			13.1125	34096	7.85692	0.000195371			13.147	33397.4	0.489872	2.83006e-05
			0.49514	0.00523602					0.495151	0.00221408			13.1176	34041.9	7.86218	0.000268556			13.1522	33403.6	0.495138	4.9184e-05
			0.500406	0.00510971					0.500417	0.00235296			13.1227	33990.8	7.86745	0.000377454			13.1573	33362.8	0.500404	5.86658e-05
			0.505672	0.00525788					0.505683	0.00255599			13.1278	33902	7.87271	0.000417073			13.1624	33327.3	0.50567	5.58089e-05
			0.510938	0.00560725					0.510949	0.00261892			13.133	33813.8	7.87798	0.000430721			13.1675	33254.5	0.510936	5.2952e-05
			0.516204	0.00600217					0.516216	0.00263922			13.1381	33739.6	7.88325	0.000444369			13.1726	33181.6	0.516202	5.32714e-05
			0.52147	0.00598827					0.521482	0.00264399			13.1432	33683.3	7.88851	0.000460535			13.1778	33154.1	0.521468	5.38586e-05
			0.526736	0.00597438					0.526748	0.00264876			13.1483	33585.2	7.89378	0.000481987			13.1829	33174.1	0.526734	5.28895e-05
			0.532002	0.00592571					0.532014	0.00264953			13.1534	33499	7.89904	0.000501606			13.188	33132.5	0.532	5.19203e-05
			0.537268	0.00584276					0.53728	0.00265795			13.1586	33474.5	7.90431	0.00050497			13.1931	33094	0.537266	-1.19183e-07
			0.542534	0.00580425					0.542546	0.00265373			13.1637	33452.3	7.90958	0.000479277			13.1982	33040.6	0.542532	-3.37978e-05
			0.5478	0.00580301					0.547812	0.00264951			13.1688	33450.6	7.91484	0.000453584			13.2034	33001.8	0.547798	-3.0371e-05
			0.553066	0.00580177					0.553078	0.00244847			13.1739	33447.5	7.92011	0.000459761			13.2085	32953.4	0.553064	-1.28427e-05
			0.558332	0.00541812					0.558344	0.00235812			13.179	33412.9	7.92537	0.000511216			13.2136	32937.8	0.55833	1.6365e-05
			0.563598	0.0049706					0.56361	0.00241106			13.1842	33353.1	7.93064	0.000590757			13.2187	32930.1	0.563596	6.39459e-05
			0.568864	0.00493104					0.568876	0.00251818			13.1893	33284.9	7.9359	0.000705462			13.2238	32916.9	0.568862	6.67193e-05
			0.57413	0.0051082					0.574142	0.00269585			13.1944	33237.5	7.94117	0.000819454			13.2289	32860.1	0.574128	6.72054e-05
			0.579396	0.00531743					0.579408	0.00286833			13.1995	33186.1	7.94644	0.00084824			13.2341	32797	0.579394	6.33799e-05
			0.584662	0.00568526					0.584674	0.00287462			13.2046	33124	7.9517	0.000853958			13.2392	32697.1	0.58466	5.95543e-05
			0.589928	0.00582151					0.58994	0.00287621			13.2098	33054.8	7.95697	0.00087822					0.589926	5.98207e-05
			0.595194	0.00583346					0.595206	0.00286617			13.2149	32986.3	7.96223	0.000908434					0.595192	6.1923e-05
			0.60046	0.00583657					0.600472	0.00285614			13.22	32937.6	7.9675	0.00094459					0.600458	5.55268e-05
			0.605726	0.00582296					0.605739	0.00286589			13.2251	32966.8	7.97277	0.000945127					0.605724	4.91307e-05
			0.610992	0.00580935					0.611005	0.00282692			13.2302	33059.9	7.97803	0.000935176					0.61099	-1.5667e-06
			0.616258	0.00583092					0.616271	0.00278794			13.2353	33192.5	7.9833	0.000925224					0.616256	-2.07158e-05
			0.621524	0.00581156					0.621537	0.00270063			13.2405	33183.9	7.98856	0.000909798					0.621522	4.9517e-06
			0.62679	0.0057922					0.626803	0.00256929			13.2456	33054.4	7.99383	0.000953175					0.626788	4.00904e-05
			0.632056	0.00535709					0.632069	0.00255975			13.2507	32967.3	7.9991	0.00104206					0.632054	8.2067e-05
			0.637322	0.00520631					0.637335	0.0026508			13.2558	32875.7	8.00436	0.00117176					0.63732	0.000101722
			0.642588	0.00531271					0.642601	0.00277411			13.2609	32794.2	8.00963	0.0012926					0.642586	0.000108727
			0.647854	0.0054638					0.647867	0.00295344			13.2661	32699.4	8.01489	0.00136555					0.647852	0.000105202
			0.65312	0.00577723					0.653133	0.00294316			13.2712	32661.9	8.02016	0.00139816					0.653117	0.000101678
			0.658386	0.00595118					0.658399	0.00293288			13.2763	32559.1	8.02543	0.00142707					0.658383	9.35268e-05
			0.663652	0.00601331					0.663665	0.00289423					8.03069	0.00146578					0.663649	9.31453e-05
			0.668918	0.00598834					0.668931	0.00286544					8.03596	0.00151169					0.668915	9.27637e-05
			0.674184	0.00596336					0.674197	0.00288169					8.04122	0.00155381					0.674181	8.04197e-05
			0.67945	0.00594383					0.679463	0.00285447					8.04649	0.00157474					0.679447	2.48599e-05
			0.684716	0.00597745					0.684729	0.00282725					8.05176	0.00157772					0.684713	3.05555e-06
			0.689981	0.00597359					0.689995	0.00275157					8.05702	0.0015807					0.689979	1.86041e-05
			0.695247	0.00596973					0.695262	0.00258039					8.06229	0.00163896					0.695245	4.30994e-05
			0.700513	0.00556942					0.700528	0.00250623					8.06755	0.00172779					0.700511	8.23632e-05
			0.705779	0.00529778					0.705794	0.00255213					8.07282	0.00184742					0.705777	0.000100987
			0.711045	0.00529371					0.71106	0.00266702					8.07809	0.00199571					0.711043	0.000104791
			0.716311	0.00550257					0.716326	0.00284401					8.08335	0.00210812					0.716309	9.56064e-05
			0.721577	0.00579923					0.721592	0.00287288					8.08862	0.00213639					0.721575	8.64212e-05
			0.726843	0.00616499					0.726858	0.00288529					8.09388	0.0021684					0.726841	8.2342e-05
			0.732109	0.00615173					0.732124	0.00288368					8.09915	0.00223924					0.732107	8.67366e-05
			0.737375	0.00613848					0.73739	0.00288094					8.10441	0.002312					0.737373	8.81998e-05
			0.742641	0.00609486					0.742656	0.00287819					8.10968	0.00240899					0.742639	5.88659e-05
			0.747907	0.00601005					0.747922	0.00287535					8.11495	0.00243821					0.747905	2.9532e-05
			0.753173	0.00591268					0.753188	0.0028725					8.12021	0.00244194					0.753171	-8.53907e-06
			0.758439	0.00582439					0.758454	0.00283691					8.12548	0.00244568					0.758437	-1.0261e-05
			0.763705	0.0057361					0.76372	0.00262453					8.13074	0.00249319					0.763703	4.35643e-06
			0.768971	0.0055492					0.768986	0.00253294					8.13601	0.00259031					0.768969	4.11633e-05
			0.774237	0.00516579					0.774252	0.00255685					8.14128	0.00270376					0.774235	9.67133e-05
			0.779503	0.00505888					0.779518	0.0026599					8.14654	0.00284774					0.779501	9.41318e-05
			0.784769	0.00515175					0.784785	0.00281436					8.15181	0.00300258					0.784767	9.15502e-05
			0.790035	0.00535746					0.790051	0.0028826					8.15707	0.0030625					0.790033	8.35399e-05
			0.795301	0.00564253					0.795317	0.00290974					8.16234	0.00309046					0.795299	7.32076e-05
			0.800567	0.00565314					0.800583	0.00292173					8.16761	0.00313043					0.800565	6.72238e-05
			0.805833	0.00564412					0.805849	0.00292504					8.17287	0.00319503					0.805831	5.72037e-05
			0.811099	0.0056351					0.811115	0.00292835					8.17814	0.0032839					0.811097	4.71836e-05
			0.816365	0.00561391					0.816381	0.00292092					8.1834	0.00336323					0.816363	2.51209e-05
			0.821631	0.00559054					0.821647	0.00291348					8.18867	0.00336769					0.821629	-2.1888e-05
			0.826897	0.00558371					0.826913	0.00289656					8.19394	0.00337215					0.826895	-3.10844e-05
			0.832163	0.00557688					0.832179	0.00270907					8.1992	0.00339459					0.832161	-1.35943e-05
			0.837429	0.00545962					0.837445	0.00258958					8.20447	0.00348199					0.837427	1.4704e-05
			0.842695	0.00498301					0.842711	0.00260449					8.20973	0.00360242					0.842693	6.10869e-05
			0.847961	0.0048029					0.847977	0.002687					8.215	0.00374146					0.847959	6.58134e-05
			0.853227	0.00493337					0.853243	0.00281093					8.22027	0.00390371					0.853225	6.69469e-05
			0.858493	0.00513637					0.858509	0.0029582					8.22553	0.00398427					0.85849	6.47203e-05
			0.863759	0.0054515					0.863775	0.0029439					8.2308	0.00402227					0.863756	6.24936e-05
			0.869025	0.0055843					0.869041	0.0029296					8.23606	0.00407687					0.869022	5.34507e-05
			0.874291	0.00562491					0.874308	0.00289687					8.24133	0.00414851					0.874288	5.2654e-05
			0.879557	0.00559186					0.879574	0.00286497					8.2466	0.00422105					0.879554	5.18573e-05
			0.884823	0.00555881					0.88484	0.00286962					8.25186	0.00431118					0.88482	3.85151e-05
			0.890089	0.0055107					0.890106	0.00282841					8.25713	0.00433922					0.890086	-2.03491e-05
			0.895355	0.00549855					0.895372	0.0027872					8.26239	0.0043526					0.895352	-5.83413e-05
			0.900621	0.0054864					0.900638	0.00269618					8.26766	0.00436598					0.900618	-5.5074e-05
			0.905887	0.00545954					0.905904	0.00251803					8.27292	0.00443559					0.905884	-2.39742e-05
			0.911153	0.00497098					0.91117	0.00248243					8.27819	0.00455295					0.91115	1.99796e-05
			0.916419	0.00476507					0.916436	0.00253222					8.28346	0.00467864					0.916416	3.87439e-05
			0.921685	0.00485054					0.921702	0.00260705					8.28872	0.00483598					0.921682	4.51354e-05
			0.926951	0.00497865					0.926968	0.00276285					8.29399	0.00494405					0.926948	4.19215e-05
			0.932217	0.0052369					0.932234	0.00278324					8.29925	0.00501705					0.932214	3.87076e-05
			0.937483	0.00558768					0.9375	0.0027894					8.30452	0.00509122					0.93748	3.14747e-05
			0.942749	0.00557095					0.942766	0.00278702					8.30979	0.00516225					0.942746	3.34599e-05
			0.948015	0.00555422					0.948032	0.00278465					8.31505	0.005233					0.948012	3.31271e-05
			0.953281	0.00550951					0.953298	0.00277208					8.32032	0.00533424					0.953278	3.27943e-05
			0.958547	0.00548606					0.958565	0.00276458					8.32558	0.00539671					0.958544	-1.99887e-05
			0.963813	0.00549698					0.963831	0.00273185					8.33085	0.00540341					0.96381	-5.61327e-05
			0.969079	0.00542689					0.969097	0.00258152					8.33612	0.00540459					0.969076	-4.52977e-05
			0.974345	0.00535681					0.974363	0.00240856					8.34138	0.00546711					0.974342	-1.30831e-05
			0.979611	0.00520125					0.979629	0.00230955					8.34665	0.00557654					0.979608	2.51508e-05
			0.984877	0.00480272					0.984895	0.00230806					8.35191	0.00569411					0.984874	7.33906e-05
			0.990143	0.00459555					0.990161	0.00239662					8.35718	0.00586202					0.99014	7.28257e-05
			0.995409	0.00473459					0.995427	0.00256511					8.36245	0.00601045					0.995406	7.22608e-05
			1.00067	0.0049984					1.00069	0.00262893					8.36771	0.00607606					1.00067	6.42679e-05
			1.00594	0.00539831					1.00596	0.00264773					8.37298	0.00611679					1.00594	5.74704e-05
			1.01121	0.00545785					1.01123	0.00264045					8.37824	0.00618474					1.0112	6.40986e-05
			1.01647	0.00548207					1.01649	0.00263317					8.38351	0.00626735					1.01647	5.88216e-05
			1.02174	0.00545617					1.02176	0.00262224					8.38878	0.00638333					1.02174	5.35447e-05
			1.027	0.00543028					1.02702	0.0026113					8.39404	0.00647857					1.027	3.30263e-05
			1.03227	0.00534097					1.03229	0.00259259					8.39931	0.00648449					1.03227	-7.3056e-06
			1.03754	0.0053183					1.03756	0.00257389					8.40457	0.0064904					1.03753	-1.82288e-05
			1.0428	0.00529563					1.04282	0.00234637					8.40984	0.00654805					1.0428	-8.77252e-08
			1.04807	0.00521595					1.04809	0.00219824					8.41511	0.00665001					1.04807	3.05428e-05
			1.05333	0.00470763					1.05335	0.00218381					8.42037	0.00678669					1.05333	8.30935e-05
			1.0586	0.0044897					1.05862	0.00224806					8.42564	0.0069497					1.0586	8.87021e-05
			1.06387	0.00462387					1.06389	0.00235309					8.4309	0.00712147					1.06386	8.95105e-05
			1.06913	0.00487559					1.06915	0.00241856					8.43617	0.00723215					1.06913	8.78859e-05
			1.0744	0.00513542					1.07442	0.0024437					8.44143	0.00728036					1.0744	8.62612e-05
			1.07966	0.00526296					1.07968	0.00242701					8.4467	0.00735132					1.07966	8.65477e-05
			1.08493	0.00529707					1.08495	0.00241033					8.45197	0.00743356					1.08493	8.34297e-05
			1.0902	0.00525155					1.09022	0.00236947					8.45723	0.00752206					1.09019	8.03118e-05
			1.09546	0.00520604					1.09548	0.00232411					8.4625	0.00762716					1.09546	6.96346e-05
			1.10073	0.00510293					1.10075	0.00230613					8.46776	0.00770414					1.10073	1.14377e-05
			1.10599	0.00509414					1.10601	0.00228816					8.47303	0.00771477					1.10599	-5.16394e-06
			1.11126	0.00508535					1.11128	0.00220546					8.4783	0.00775124					1.11126	1.38531e-05
			1.11653	0.00505612					1.11655	0.00202833					8.48356	0.00783595					1.11652	4.24303e-05
			1.12179	0.00462196					1.12181	0.00200455					8.48883	0.00797662					1.12179	9.58655e-05
			1.12706	0.00434459					1.12708	0.00207535					8.49409	0.00814611					1.12706	0.000136502
			1.13232	0.00440076					1.13234	0.00216526					8.49936	0.00834163					1.13232	0.000136992
			1.13759	0.00459312					1.13761	0.00233582					8.50463	0.00847957					1.13759	0.000137482
			1.14286	0.00490578					1.14288	0.0023612					8.50989	0.00856221					1.14285	0.000137876
			1.14812	0.00528905					1.14814	0.00237061					8.51516	0.00864917					1.14812	0.000142848
			1.15339	0.00528982					1.15341	0.00233635					8.52042	0.0087467					1.15339	0.000152761
			1.15865	0.00526205					1.15867	0.00230208					8.52569	0.00885493					1.15865	0.000142862
			1.16392	0.00523428					1.16394	0.00227271					8.53096	0.008984					1.16392	0.000132964
			1.16919	0.00511153					1.16921	0.00226341					8.53622	0.00908916					1.16918	0.0001102
			1.17445	0.00509723					1.17447	0.00225411					8.54149	0.00913463					1.17445	7.71039e-05
			1.17972	0.00500097					1.17974	0.00217869					8.54675	0.00916433					1.17971	9.15665e-05
			1.18498	0.00490471					1.18501	0.00195901					8.55202	0.00924504					1.18498	0.000121256
			1.19025	0.00470053					1.19027	0.00188569					8.55729	0.00940719					1.19025	0.000163139
			1.19552	0.00434735					1.19554	0.00193264					8.56255	0.00958632					1.19551	0.000212855
			1.20078	0.00432402					1.2008	0.0020153					8.56782	0.00977572					1.20078	0.000215087
			1.20605	0.00448466					1.20607	0.00217119					8.57308	0.00993991					1.20604	0.000214908
			1.21131	0.00474204					1.21134	0.00224287					8.57835	0.0100532					1.21131	0.000214728
			1.21658	0.00520745					1.2166	0.0022355					8.58362	0.010157					1.21658	0.000206965
			1.22185	0.00525003					1.22187	0.00222814					8.58888	0.0102758					1.22184	0.000205338
			1.22711	0.00526365					1.22713	0.00221192					8.59415	0.0103912					1.22711	0.000204454
			1.23238	0.00524523					1.2324	0.0021944					8.59941	0.0105205					1.23237	0.00020357
			1.23764	0.00522682					1.23767	0.00218128					8.60468	0.0106597					1.23764	0.000181487
			1.24291	0.00522693					1.24293	0.00216816					8.60994	0.0107275					1.24291	0.00014012
			1.24818	0.00521567					1.2482	0.0021334					8.61521	0.01077					1.24817	0.000137046
			1.25344	0.0052044					1.25346	0.00193204					8.62048	0.0108502					1.25344	0.00016169
			1.25871	0.00509007					1.25873	0.00179426					8.62574	0.0110021					1.2587	0.000196566
			1.26397	0.00467567					1.264	0.00179761					8.63101	0.0111759					1.26397	0.000242736
			1.26924	0.00452878					1.26926	0.00189419					8.63627	0.0113741					1.26924	0.000249897
			1.27451	0.00465197					1.27453	0.00201258					8.64154	0.0115774					1.2745	0.00025241
			1.27977	0.00492375					1.27979	0.00207091					8.64681	0.0117305					1.27977	0.000250371
			1.28504	0.00526405					1.28506	0.00209639					8.65207	0.0118382					1.28503	0.000248332
			1.2903	0.00538507					1.29033	0.00208902					8.65734	0.011957					1.2903	0.000254684
			1.29557	0.00542288					1.29559	0.00208165					8.6626	0.0120739					1.29557	0.000254046
			1.30084	0.00542049					1.30086	0.00206016					8.66787	0.0122278					1.30083	0.000253408
			1.3061	0.00541811					1.30612	0.00203026					8.67314	0.0124236					1.3061	0.000237855
			1.31137	0.00539069					1.31139	0.00199812					8.6784	0.012549					1.31136	0.000186305
			1.31663	0.00536941					1.31666	0.00196597					8.68367	0.012613					1.31663	0.000165691
			1.3219	0.00534813					1.32192	0.00188937					8.68893	0.0127053					1.3219	0.000184154
			1.32717	0.0052884					1.32719	0.00170736					8.6942	0.0128757					1.32716	0.000220402
			1.33243	0.00481008					1.33245	0.00168865					8.69947	0.013063					1.33243	0.000275369
			1.3377	0.00446862					1.33772	0.00178533					8.70473	0.013292					1.33769	0.000296556
			1.34296	0.00451354					1.34299	0.00190813					8.71	0.013538					1.34296	0.000301693
			1.34823	0.00470699					1.34825	0.00206351					8.71526	0.0137441					1.34823	0.00030333
			1.3535	0.00501618					1.35352	0.00208885					8.72053	0.0138772					1.35349	0.000304968
			1.35876	0.00519815					1.35878	0.00209688					8.7258	0.0140232					1.35876	0.000310742
			1.36403	0.00528914					1.36405	0.00207705					8.73106	0.0142091					1.36402	0.000311574
			1.36929	0.00526329					1.36932	0.00205722					8.73633	0.0143963					1.36929	0.000301423
			1.37456	0.00523744					1.37458	0.0020391					8.74159	0.0145955					1.37456	0.000291271
			1.37983	0.00514173					1.37985	0.00204014					8.74686	0.0147741					1.37982	0.0002696
			1.38509	0.00514699					1.38512	0.00201327					8.75213	0.0148977					1.38509	0.000231999
			1.39036	0.00513601					1.39038	0.00198639					8.75739	0.0150098					1.39035	0.000240034
			1.39562	0.00512503					1.39565	0.00177254					8.76266	0.0151838					1.39562	0.000277935
			1.40089	0.00469474					1.40091	0.0017358					8.76792	0.0153904					1.40089	0.000330738
			1.40616	0.00432682					1.40618	0.00181314					8.77319	0.0156606					1.40615	0.000387808
			1.41142	0.00429699					1.41145	0.00191618					8.77845	0.0159385					1.41142	0.000391288
			1.41669	0.00444791					1.41671	0.00205209					8.78372	0.0162026					1.41668	0.000392918
			1.42195	0.00466673					1.42198	0.00211545					8.78899	0.016389					1.42195	0.000393228
			1.42722	0.00508532					1.42724	0.00213609					8.79425	0.0165912					1.42722	0.000392941
			1.43249	0.00511255					1.43251	0.00212863					8.79952	0.0167953					1.43248	0.000392653
			1.43775	0.00511362					1.43778	0.00212117					8.80478	0.0170138					1.43775	0.000392039
			1.44302	0.00509764					1.44304	0.00211102					8.81005	0.0172423					1.44301	0.000391425
			1.44828	0.00508165					1.44831	0.00210791					8.81532	0.0174945					1.44828	0.000339337
			1.45355	0.00510504					1.45357	0.0021048					8.82058	0.0176723					1.45355	0.000294676
			1.45882	0.00506595					1.45884	0.00207412					8.82585	0.0178218					1.45881	0.0002955
			1.46408	0.00502687					1.46411	0.00188263					8.83111	0.0180211					1.46408	0.000322202
			1.46935	0.00489556					1.46937	0.00173772					8.83638	0.0182821					1.46934	0.000356061
			1.47461	0.00444664					1.47464	0.00171676					8.84165	0.0186016					1.47461	0.000395333
			1.47988	0.00426505					1.4799	0.00179879					8.84691	0.0189389					1.47988	0.000405295
			1.48515	0.00434154					1.48517	0.00194639					8.85218	0.0192398					1.48514	0.000403015
			1.49041	0.00457675					1.49044	0.00216361					8.85744	0.0194905					1.49041	0.000400735
			1.49568	0.00498833					1.4957	0.00215394					8.86271	0.019736					1.49567	0.000395889
			1.50094	0.0051524					1.50097	0.00214426					8.86798	0.0199715					1.50094	0.000400128
			1.50621	0.00515184					1.50623	0.00212507					8.87324	0.020225					1.50621	0.00040375
			1.51148	0.00515128					1.5115	0.00210037					8.87851	0.0204909					1.51147	0.000397574
			1.51674	0.00513109					1.51677	0.00209195					8.88377	0.0208036					1.51674	0.000391398
			1.52201	0.00504893					1.52203	0.00205362					8.88904	0.0210366					1.522	0.000341778
			1.52727	0.00504425					1.5273	0.0020153					8.89431	0.021229					1.52727	0.000333587
			1.53254	0.00503957					1.53256	0.00193298					8.89957	0.0214796					1.53254	0.000355738
			1.53781	0.00500853					1.53783	0.00176699					8.90484	0.0217884					1.5378	0.000386512
			1.54307	0.00462625					1.5431	0.00175237					8.9101	0.0221183					1.54307	0.000427686
			1.54834	0.00437505					1.54836	0.0018526					8.91537	0.0224603					1.54833	0.000447438
			1.5536	0.00442104					1.55363	0.00200096					8.92064	0.0228596					1.5536	0.000453332
			1.55887	0.00462811					1.5589	0.00216417					8.9259	0.0231985					1.55887	0.000448009
			1.56414	0.00501281					1.56416	0.00216925					8.93117	0.0234918					1.56413	0.000442686
			1.5694	0.00515846					1.56943	0.00216582					8.93643	0.0237503					1.5694	0.000439039
			1.57467	0.0052092					1.57469	0.00216239					8.9417	0.0240655					1.57466	0.000438879
			1.57993	0.00519244					1.57996	0.00215148					8.94697	0.0243837					1.57993	0.000438719
			1.5852	0.00517567					1.58523	0.0021261					8.95223	0.0247416					1.58519	0.000429929
			1.59047	0.0051095					1.59049	0.0021138					8.9575	0.0250456					1.59046	0.000382864
			1.59573	0.0051175					1.59576	0.00210149					8.96276	0.025306					1.59573	0.000353881
			1.601	0.00504524					1.60102	0.00204783					8.96803	0.0255555					1.60099	0.00035953
			1.60626	0.00497297					1.60629	0.00185351					8.97329	0.0258911					1.60626	0.000389956
			1.61153	0.00478452					1.61156	0.00177512					8.97856	0.0262419					1.61152	0.000430156
			1.61679	0.00442707					1.61682	0.00184398					8.98383	0.02665					1.61679	0.00045641
			1.62206	0.00439976					1.62209	0.00196284					8.98909	0.0270719					1.62206	0.000468957
			1.62733	0.00460625					1.62735	0.00211762					8.99436	0.0274863					1.62732	0.000470989
			1.63259	0.00486606					1.63262	0.00219681					8.99962	0.0278222					1.63259	0.000471027
			1.63786	0.00524203					1.63789	0.00222736					9.00489	0.0281353					1.63785	0.000471065
			1.64312	0.00525677					1.64315	0.00222623					9.01016	0.0284906					1.64312	0.000469745
			1.64839	0.00523938					1.64842	0.00221701					9.01542	0.0288625					1.64839	0.0004589
			1.65366	0.00522198					1.65368	0.00220779					9.02069	0.0292341					1.65365	0.000448055
			1.65892	0.00508202					1.65895	0.00221511					9.02595	0.0295921					1.65892	0.000423596
			1.66419	0.00505679					1.66422	0.00220723					9.03122	0.0299225					1.66418	0.000386437
			1.66945	0.00505573					1.66948	0.00219935					9.03649	0.0301993					1.66945	0.000391714
			1.67472	0.00505467					1.67475	0.00200345					9.04175	0.0305386					1.67472	0.000421572
			1.67999	0.00487657					1.68001	0.00191864					9.04702	0.0309268					1.67998	0.000452403
			1.68525	0.00444642					1.68528	0.0019369					9.05228	0.0313873					1.68525	0.000495506
			1.69052	0.0044039					1.69055	0.00200737					9.05755	0.0318271					1.69051	0.000501446
			1.69578	0.00455161					1.69581	0.00217654					9.06282	0.0322485					1.69578	0.000504484
			1.70105	0.00474453					1.70108	0.00229565					9.06808	0.0326597					1.70105	0.000503663
			1.70632	0.00507423					1.70634	0.00235215					9.07335	0.0330387					1.70631	0.000502843
			1.71158	0.00515764					1.71161	0.00235008					9.07861	0.0333987					1.71158	0.000503215
			1.71685	0.00519458					1.71688	0.002348					9.08388	0.0337475					1.71684	0.000505536
			1.72211	0.00517908					1.72214	0.00232388					9.08915	0.0341446					1.72211	0.000499105
			1.72738	0.00516359					1.72741	0.00234338					9.09441	0.0345381					1.72738	0.000492674
			1.73265	0.00516987					1.73268	0.00229777					9.09968	0.0349292					1.73264	0.000444335
			1.73791	0.0051371					1.73794	0.00225216					9.10494	0.0352271					1.73791	0.000422714
			1.74318	0.00510433					1.74321	0.00215479					9.11021	0.0355737					1.74317	0.000440459
			1.74844	0.00498883					1.74847	0.00200135					9.11548	0.0359478					1.74844	0.00046944
			1.75371	0.00450743					1.75374	0.00199594					9.12074	0.0363941					1.75371	0.000516315
			1.75898	0.00429603					1.75901	0.00204786					9.12601	0.0368217					1.75897	0.000523927
			1.76424	0.00429839					1.76427	0.00216762					9.13127	0.0372881					1.76424	0.000525512
			1.76951	0.00446389					1.76954	0.0022587					9.13654	0.037697					1.7695	0.000522713
			1.77477	0.00478643					1.7748	0.00229966					9.1418	0.0380872					1.77477	0.000519914
			1.78004	0.00491685					1.78007	0.00229979					9.14707	0.038418					1.78004	0.000522172
			1.78531	0.00494946					1.78534	0.00229866					9.15234	0.038765					1.7853	0.00052716
			1.79057	0.00493098					1.7906	0.00229691					9.1576	0.0391317					1.79057	0.000527704
			1.79584	0.0049125					1.79587	0.00229515					9.16287	0.0395444					1.79583	0.000501007
			1.8011	0.00490652					1.80113	0.00226947					9.16813	0.0398963					1.8011	0.000474311
			1.80637	0.00490055					1.8064	0.0022438					9.1734	0.0401704					1.80637	0.000454476
			1.81164	0.00485592					1.81167	0.00216108					9.17867	0.0404727					1.81163	0.000469296
			1.8169	0.0048113					1.81693	0.00197382					9.18393	0.0408229					1.8169	0.000493375
			1.82217	0.00435707					1.8222	0.00192424					9.1892	0.0411939					1.82216	0.000533142
			1.82743	0.00400389					1.82746	0.00199717					9.19446	0.0415812					1.82743	0.000554308
			1.8327	0.00400819					1.83273	0.00212631					9.19973	0.0420241					1.8327	0.000562806
			1.83797	0.0041973					1.838	0.00229607					9.205	0.0423979					1.83796	0.000561323
			1.84323	0.00446771					1.84326	0.00237252					9.21026	0.0427287					1.84323	0.00055984
			1.8485	0.00485342					1.84853	0.00236613					9.21553	0.0430272					1.84849	0.000557184
			1.85376	0.00486249					1.85379	0.00235975					9.22079	0.0433504					1.85376	0.000553307
			1.85903	0.00485031					1.85906	0.00234708					9.22606	0.04366					1.85903	0.00054943
			1.8643	0.00483813					1.86433	0.00233264					9.23133	0.043992					1.86429	0.000539974
			1.86956	0.0047824					1.86959	0.00232263					9.23659	0.0443196					1.86956	0.000493216
			1.87483	0.00472288					1.87486	0.00231263					9.24186	0.0445658					1.87482	0.000446558
			1.88009	0.00463579					1.88012	0.00227703					9.24712	0.0447845					1.88009	0.000431957
			1.88536	0.0045487					1.88539	0.00204979					9.25239	0.0450379					1.88536	0.000448355
			1.89063	0.00436066					1.89066	0.00192357					9.25766	0.0453603					1.89062	0.000479133
			1.89589	0.00391329					1.89592	0.00199931					9.26292	0.0456754					1.89589	0.000504224
			1.90116	0.00378262					1.90119	0.00211597					9.26819	0.0460498					1.90115	0.000514999
			1.90642	0.00393013					1.90646	0.00222667					9.27345	0.0463802					1.90642	0.000324918
			1.91169	0.00413966					1.91172	0.00229411					9.27872	0.0466537					1.91169	0.000134838
			1.91696	0.00442529					1.91699	0.00232476					9.28399	0.0468788					1.91695	0.00012575
			1.92222	0.0044374					1.92225	0.00231593					9.28925	0.0471391					1.92222	0.00049584
			1.92749	0.00441447					1.92752	0.00230711					9.29452	0.0473666					1.92748	0.000484094
			1.93275	0.00439154					1.93279	0.0022626					9.29978	0.0476094					1.93275	0.000472348
			1.93802	0.00431137					1.93805	0.0022563					9.30505	0.0478506					1.93802	0.000448544
			1.94329	0.00429465					1.94332	0.00224615					9.31031	0.0480461					1.94328	0.000393013
			1.94855	0.00428681					1.94858	0.00223599					9.31558	0.0481687					1.94855	0.000382014
			1.95382	0.00423859					1.95385	0.00202583					9.32085	0.0483162					1.95381	0.000404475
			1.95908	0.00389642					1.95912	0.0018517					9.32611	0.048515					1.95908	0.000431707
			1.96435	0.00339439					1.96438	0.0018296					9.33138	0.0487628					1.96435	0.000472279
			1.96962	0.00310472					1.96965	0.00188528					9.33664	0.0490031					1.96961	0.000472564
			1.97488	0.00307343					1.97491	0.00200583					9.34191	0.0492338					1.97488	0.000469123
			1.98015	0.00321223					1.98018	0.00218798					9.34718	0.0494171					1.98014	0.000465682
			1.98541	0.00354613					1.98545	0.00218682					9.35244	0.0495425					1.98541	0.000458513
			1.99068	0.00372918					1.99071	0.00217107					9.35771	0.0496529					1.99067	0.000454811
			1.99595	0.00378095					1.99598	0.00215531					9.36297	0.0497527					1.99594	0.000452673
			2.00121	0.00373921					2.00124	0.00211577					9.36824	0.0498858					2.00121	0.000438634
			2.00648	0.00369746					2.00651	0.00211201					9.37351	0.0500255					2.00647	0.000424596
			2.01174	0.00367522					2.01178	0.00207715					9.37877	0.0500689					2.01174	0.000357654
			2.01701	0.00365868					2.01704	0.00204229					9.38404	0.050087					2.017	0.000326881
			2.02228	0.00364214					2.02231	0.00196283					9.3893	0.0501051					2.02227	0.000338185
			2.02754	0.00358908					2.02757	0.00177023					9.39457	0.0501604					2.02754	0.000360934
			2.03281	0.00312521					2.03284	0.00172128					9.39984	0.0502645					2.0328	0.000393811
			2.03807	0.00276449					2.03811	0.00177681					9.4051	0.0503805					2.03807	0.000415302
			2.04334	0.0027784					2.04337	0.00186678					9.41037	0.0504949					2.04333	0.000425552
			2.04861	0.00295825					2.04864	0.00202399					9.41563	0.0505252					2.0486	0.000420052
			2.05387	0.00321687					2.0539	0.00203514					9.4209	0.0505377					2.05387	0.000414551
			2.05914	0.00339481					2.05917	0.00203289					9.42617	0.0505371					2.05913	0.000399145
			2.0644	0.00347593					2.06444	0.00203064					9.43143	0.0505365					2.0644	0.000398287
			2.06967	0.00345108					2.0697	0.00201117					9.4367	0.050509					2.06966	0.000397429
			2.07494	0.00342623					2.07497	0.00200157					9.44196	0.0504914					2.07493	0.000392893
			2.0802	0.00339764					2.08024	0.00198067					9.44723	0.0504457					2.0802	0.000326426
			2.08547	0.00336281					2.0855	0.00195976					9.4525	0.0503289					2.08546	0.000286259
			2.09073	0.00330106					2.09077	0.00190755					9.45776	0.050181					2.09073	0.000286896
			2.096	0.00323931					2.09603	0.00172188					9.46303	0.0500809					2.09599	0.00030329
			2.10127	0.00306885					2.1013	0.00163262					9.46829	0.0500293					2.10126	0.000333269
			2.10653	0.00262136					2.10657	0.00167187					9.47356	0.0500037					2.10653	0.000380461
			2.1118	0.00244649					2.11183	0.00177302					9.47882	0.0499938					2.11179	0.00037513
			2.11706	0.00258428					2.1171	0.00191767					9.48409	0.049984					2.11706	0.0003698
			2.12233	0.00277193					2.12236	0.00197017					9.48936	0.0498764					2.12232	0.000358871
			2.1276	0.00301352					2.12763	0.0019799					9.49462	0.0497324					2.12759	0.00034578
			2.13286	0.0029879					2.1329	0.00195891					9.49989	0.0495852					2.13286	0.000336928
			2.13813	0.00296229					2.13816	0.00193793					9.50515	0.0494454					2.13812	0.00032624
			2.14339	0.00287366					2.14343	0.00188472					9.51042	0.0493233					2.14339	0.000315553
			2.14866	0.00268116					2.14869	0.00184569					9.51569	0.0491895					2.14865	0.000291643
			2.15393	0.00255665					2.15396	0.0018245					9.52095	0.0489765					2.15392	0.000241298
			2.15919	0.00250188					2.15923	0.00180331					9.52622	0.0486869					2.15919	0.000228515
			2.16446	0.00244711					2.16449	0.00156837					9.53148	0.0484653					2.16445	0.000237008
			2.16972	0.00227907					2.16976	0.00139111					9.53675	0.0482895					2.16972	0.000259021
			2.17499	0.00175463					2.17502	0.00138348					9.54202	0.0481652					2.17498	0.000300723
			2.18026	0.00150262					2.18029	0.00146311					9.54728	0.04805					2.18025	0.000303092
			2.18552	0.00158565					2.18556	0.00155383					9.55255	0.0479396					2.18552	0.000301509
			2.19079	0.001761					2.19082	0.0017102					9.55781	0.0477412					2.19078	0.000299925
			2.19605	0.00202845					2.19609	0.00169337					9.56308	0.0474875					2.19605	0.000292226
			2.20132	0.00217623					2.20135	0.00167654					9.56835	0.0472466					2.20131	0.000288372
			2.20659	0.00221283					2.20662	0.0016355					9.57361	0.0469939					2.20658	0.000284154
			2.21185	0.00217483					2.21189	0.00158264					9.57888	0.0467448					2.21185	0.000279937
			2.21712	0.00213684					2.21715	0.00157277					9.58414	0.0465336					2.21711	0.000270689
			2.22238	0.00214066					2.22242	0.00154287					9.58941	0.0462777					2.22238	0.000207372
			2.22765	0.00216545					2.22768	0.00151296					9.59468	0.0459088					2.22764	0.000171139
			2.23292	0.00206831					2.23295	0.00143112					9.59994	0.0455749					2.23291	0.000184379
			2.23818	0.00197116					2.23822	0.00124462					9.60521	0.0452918					2.23818	0.000207751
			2.24345	0.00176558					2.24348	0.00121693					9.61047	0.0450711					2.24344	0.000240786
			2.24871	0.00149225					2.24875	0.0012741					9.61574	0.0448456					2.24871	0.000257037
			2.25398	0.00156821					2.25402	0.00136925					9.62101	0.0446631					2.25397	0.00026095
			2.25925	0.0017147					2.25928	0.0015361					9.62627	0.0444184					2.25924	0.000252282
			2.26451	0.00194965					2.26455	0.00153852					9.63154	0.0441105					2.26451	0.000243614
			2.26978	0.00215626					2.26981	0.00152791					9.6368	0.0437672					2.26977	0.000232326
			2.27504	0.00224352					2.27508	0.00151729					9.64207	0.0434445					2.27504	0.000232857
			2.28031	0.00225126					2.28035	0.00149731					9.64733	0.043122					2.2803	0.000231843
			2.28558	0.0022404					2.28561	0.00149326					9.6526	0.0428514					2.28557	0.000230828
			2.29084	0.00222955					2.29088	0.00148921					9.65787	0.0425274					2.29084	0.000166637
			2.29611	0.00220008					2.29614	0.00146864					9.66313	0.0421251					2.2961	0.000131335
			2.30137	0.00217488					2.30141	0.0013331					9.6684	0.0416732					2.30137	0.00013623
			2.30664	0.00214967					2.30668	0.00112282					9.67366	0.0413349					2.30663	0.000156337
			2.31191	0.00174803					2.31194	0.0010098					9.67893	0.041069					2.3119	0.000186899
			2.31717	0.00138393					2.31721	0.00102053					9.6842	0.0407812					2.31717	0.000205212
			2.32244	0.00128336					2.32247	0.00108591					9.68946	0.040532					2.32243	0.000213449
			2.3277	0.00136963					2.32774	0.00121824					9.69473	0.0402673					2.3277	0.000207003
			2.33297	0.00158367					2.33301	0.00124591					9.69999	0.0399374					2.33296	0.000200558
			2.33824	0.00203036					2.33827	0.0012542					9.70526	0.0395569					2.33823	0.000187033
			2.3435	0.00202669					2.34354	0.00123328					9.71053	0.0392161					2.3435	0.0001811
			2.34877	0.00202302					2.3488	0.00121235					9.71579	0.0388632					2.34876	0.000176169
			2.35403	0.00194629					2.35407	0.00117593					9.72106	0.0385583					2.35403	0.000171238
			2.3593	0.00178631					2.35934	0.00116283					9.72632	0.038231					2.35929	0.00012135
			2.36456	0.00175391					2.3646	0.00113696					9.73159	0.0378365					2.36456	6.57295e-05
			2.36983	0.00170794					2.36987	0.00111109					9.73686	0.0374118					2.36983	3.6504e-05
			2.3751	0.00166197					2.37513	0.000866061					9.74212	0.0370087					2.37509	4.61256e-05
			2.38036	0.0015165					2.3804	0.000695533					9.74739	0.0366966					2.38036	7.64575e-05
			2.38563	0.00106276					2.38567	0.000692965					9.75265	0.0364097					2.38562	0.000118576
			2.39089	0.000859552					2.39093	0.000775486					9.75792	0.0361394					2.39089	0.000113732
			2.39616	0.000942961					2.3962	0.000873681					9.76319	0.035885					2.39615	0.000108889
			2.40143	0.00115737					2.40146	0.000943453					9.76845	0.0355787					2.40142	9.53866e-05
			2.40669	0.00143431					2.40673	0.000977109					9.77372	0.0351917					2.40669	9.1643e-05
			2.41196	0.00156171					2.412	0.000976542					9.77898	0.0348546					2.41195	8.77275e-05
			2.41722	0.00160518					2.41726	0.00096624					9.78425	0.0345042					2.41722	8.37679e-05
			2.42249	0.00159064					2.42253	0.000955937					9.78952	0.0341902					2.42248	7.97016e-05
			2.42776	0.0015761					2.42779	0.000935052					9.79478	0.0338826					2.42775	4.14974e-05
			2.43302	0.00155144					2.43306	0.000906077					9.80005	0.0335181					2.43302	-1.69291e-05
			2.43829	0.00155667					2.43833	0.000877102					9.80531	0.0330693					2.43828	-5.0026e-05
			2.44355	0.00154786					2.44359	0.000778303					9.81058	0.0326788					2.44355	-3.24142e-05
			2.44882	0.00153904					2.44886	0.000593185					9.81584	0.0323384					2.44881	8.71457e-07
			2.45409	0.0010869					2.45413	0.000562051					9.82111	0.0320628					2.45408	3.69679e-05
			2.45935	0.000852906					2.45939	0.000628668					9.82638	0.0318161					2.45935	5.38437e-05
			2.46462	0.000837739					2.46466	0.000749027					9.83164	0.0315816					2.46461	6.02558e-05
			2.46988	0.000988493					2.46992	0.000903714					9.83691	0.0313163					2.46988	5.77106e-05
			2.47515	0.00131369					2.47519	0.000948237					9.84217	0.0309499					2.47514	5.51653e-05
			2.48042	0.00171148					2.48046	0.000949381					9.84744	0.0306007					2.48041	4.62561e-05
			2.48568	0.00169994					2.48572	0.000935394					9.85271	0.0302633					2.48568	4.42884e-05
			2.49095	0.00168841					2.49099	0.000921408					9.85797	0.0299619					2.49094	3.68475e-05
			2.49621	0.00164128					2.49625	0.00092429					9.86324	0.0296624					2.49621	2.94066e-05
			2.50148	0.00162482					2.50152	0.000924814					9.8685	0.0293586					2.50147	-2.37865e-05
			2.50675	0.00162136					2.50679	0.000897164					9.87377	0.0289445					2.50674	-6.2943e-05
			2.51201	0.0016179					2.51205	0.000869515					9.87904	0.0285453					2.51201	-6.31601e-05
			2.51728	0.00159488					2.51732	0.000673236					9.8843	0.0282252					2.51727	-3.92989e-05
			2.52254	0.00120272					2.52258	0.000604305					9.88957	0.0279458					2.52254	-4.11213e-06
			2.52781	0.000853769					2.52785	0.00065274					9.89483	0.0277048					2.5278	3.75793e-05
			2.53308	0.000774165					2.53312	0.000732848					9.9001	0.0274952					2.53307	3.45069e-05
			2.53834	0.000886719					2.53838	0.00087229					9.90537	0.0272792					2.53834	3.14344e-05
			2.54361	0.00110774					2.54365	0.000894829					9.91063	0.0269781					2.5436	2.19701e-05
			2.54887	0.0015287					2.54891	0.000897579					9.9159	0.0266817					2.54887	4.70194e-06
			2.55414	0.00154738					2.55418	0.00088118					9.92116	0.0263705					2.55413	-1.14844e-06
			2.55941	0.00152958					2.55945	0.000864781					9.92643	0.0260786					2.5594	-1.34621e-05
			2.56467	0.00151178					2.56471	0.000848832					9.9317	0.0257862					2.56467	-2.57757e-05
			2.56994	0.00147403					2.56998	0.000839304					9.93696	0.0255336					2.56993	-5.36112e-05
			2.5752	0.00151501					2.57524	0.000808939					9.94223	0.0251812					2.5752	-0.000101941
			2.58047	0.00148235					2.58051	0.000778574					9.94749	0.0248017					2.58046	-0.000112381
			2.58574	0.0014497					2.58578	0.000597874					9.95276	0.0244613					2.58573	-9.43682e-05
			2.591	0.00134016					2.59104	0.000441095					9.95803	0.0242228					2.591	-6.95447e-05
			2.59627	0.000896326					2.59631	0.000435483					9.96329	0.0240097					2.59626	-3.35061e-05
			2.60153	0.000744499					2.60157	0.000502277					9.96856	0.0238461					2.60153	-2.97834e-05
			2.6068	0.000856407					2.60684	0.000591912					9.97382	0.0236735					2.60679	-3.07429e-05
			2.61207	0.00107515					2.61211	0.000674081					9.97909	0.0234421					2.61206	-3.17024e-05
			2.61733	0.00146283					2.61737	0.000713474					9.98436	0.0231413					2.61733	-4.58148e-05
			2.6226	0.00153813					2.62264	0.000702879					9.98962	0.0228658					2.62259	-4.60929e-05
			2.62786	0.0015698					2.62791	0.000692285					9.99489	0.0226172					2.62786	-4.67324e-05
			2.63313	0.0015052					2.63317	0.000644301					10.0002	0.0223803					2.63312	-4.73719e-05
			2.6384	0.0014406					2.63844	0.000611112					10.0054	0.0221596					2.63839	-6.27367e-05
			2.64366	0.00136505					2.6437	0.000570436					10.0107	0.0218812					2.64366	-0.000116018
			2.64893	0.00139716					2.64897	0.00052976					10.016	0.0215474					2.64892	-0.000134317
			2.65419	0.00139204					2.65424	0.000442043					10.0212	0.021239					2.65419	-0.000118705
			2.65946	0.00138691					2.6595	0.000270432					10.0265	0.0210362					2.65945	-9.22917e-05
			2.66473	0.000905765					2.66477	0.000240974					10.0317	0.0208608					2.66472	-5.21482e-05
			2.66999	0.000585784					2.67003	0.000309606					10.037	0.020706					2.66999	-4.40436e-05
			2.67526	0.000644447					2.6753	0.000419627					10.0423	0.0205661					2.67525	-4.10073e-05
			2.68052	0.000901389					2.68057	0.000575648					10.0475	0.0204093					2.68052	-4.07163e-05
			2.68579	0.00117992					2.68583	0.00058864					10.0528	0.020188					2.68578	-4.04253e-05
			2.69106	0.00137936					2.6911	0.000589778					10.0581	0.019949					2.69105	-3.97653e-05
			2.69632	0.00147625					2.69636	0.000574882					10.0633	0.0197413					2.69632	-4.08884e-05
			2.70159	0.00149438					2.70163	0.000559986					10.0686	0.0195653					2.70158	-4.20115e-05
			2.70685	0.00148407					2.7069	0.000545021					10.0739	0.0194129					2.70685	-4.49178e-05
			2.71212	0.00147376					2.71216	0.000524118					10.0791	0.019217					2.71211	-9.96779e-05
			2.71739	0.00152333					2.71743	0.000503214					10.0844	0.0189771					2.71738	-0.000140671
			2.72265	0.00147358					2.72269	0.000425418					10.0897	0.0187097					2.72265	-0.000145171
			2.72792	0.00142382					2.72796	0.000234368					10.0949	0.0185254					2.72791	-0.000119495
			2.73318	0.00127108					2.73323	0.00017526					10.1002	0.0183788					2.73318	-7.89852e-05
			2.73845	0.000992216					2.73849	0.000231648					10.1055	0.0182616					2.73844	-5.47577e-05
			2.74372	0.000987241					2.74376	0.000332647					10.1107	0.0181884					2.74371	-4.27227e-05
			2.74898	0.00113874					2.74902	0.000461438					10.116	0.0181062					2.74898	-4.20508e-05
			2.75425	0.00140319					2.75429	0.000511671					10.1213	0.0179285					2.75424	-4.56877e-05
			2.75951	0.00178597					2.75956	0.000513713					10.1265	0.0177298					2.75951	-4.93247e-05
			2.76478	0.00181023					2.76482	0.000487197					10.1318	0.0175431					2.76477	-5.36117e-05
			2.77005	0.00180828					2.77009	0.00046068					10.1371	0.0174028					2.77004	-6.42368e-05
			2.77531	0.00180632					2.77535	0.000449274					10.1423	0.0172789					2.77531	-7.48618e-05
			2.78058	0.00172157					2.78062	0.000449861					10.1476	0.0171469					2.78057	-9.83174e-05
			2.78584	0.00165628					2.78589	0.00042681					10.1529	0.0169307					2.78584	-0.000145787
			2.79111	0.0016272					2.79115	0.000403759					10.1581	0.0166908					2.7911	-0.000152772
			2.79638	0.00159811					2.79642	0.000198597					10.1634	0.0165185					2.79637	-0.000134718
			2.80164	0.00144544					2.80169	7.99765e-05					10.1687	0.0164084					2.80164	-0.000105292
			2.80691	0.00102457					2.80695	9.44338e-05					10.1739	0.0163374					2.8069	-6.52848e-05
			2.81217	0.000877776					2.81222	0.000164129					10.1792	0.0163002					2.81217	-6.46068e-05
			2.81744	0.00098171					2.81748	0.000308749					10.1845	0.0162575					2.81743	-6.64903e-05
			2.82271	0.00115513					2.82275	0.000395141					10.1897	0.0161504					2.8227	-6.83738e-05
			2.82797	0.001524					2.82802	0.000431087					10.195	0.0160136					2.82796	-7.12758e-05
			2.83324	0.00155956					2.83328	0.000418135					10.2003	0.0158747					2.83323	-7.45461e-05
			2.8385	0.00155431					2.83855	0.000405184					10.2055	0.0157616					2.8385	-8.03043e-05
			2.84377	0.00154906					2.84381	0.000367764					10.2108	0.0156474					2.84376	-8.60625e-05
			2.84904	0.00150331					2.84908	0.000362223					10.2161	0.0155675					2.84903	-0.000102283
			2.8543	0.00146028					2.85435	0.000310724					10.2213	0.0154342					2.85429	-0.000161745
			2.85957	0.00144766					2.85961	0.000259225					10.2266	0.0152071					2.85956	-0.000189232
			2.86483	0.00134191					2.86488	0.000154855					10.2319	0.0150273					2.86483	-0.000175409
			2.8701	0.00123616					2.87014	-3.69872e-05					10.2371	0.0149546					2.87009	-0.000146408
			2.87537	0.000799642					2.87541	-7.08316e-05					10.2424	0.0149159					2.87536	-0.000100928
			2.88063	0.00052403					2.88068	1.65055e-05					10.2477	0.0148764					2.88062	-8.31915e-05
			2.8859	0.000610758					2.88594	0.000123433					10.2529	0.0148713					2.88589	-7.79376e-05
			2.89116	0.00081939					2.89121	0.000263182					10.2582	0.0148143					2.89116	-8.2607e-05
			2.89643	0.00111848					2.89647	0.000268013					10.2634	0.0146978					2.89642	-8.72764e-05
			2.9017	0.00148097					2.90174	0.000265448					10.2687	0.0145972					2.90169	-8.85071e-05
			2.90696	0.00149647					2.90701	0.000262884					10.274	0.0145309					2.90695	-8.95623e-05
			2.91223	0.00150165					2.91227	0.000252063					10.2792	0.0144688					2.91222	-9.06174e-05
			2.91749	0.00143657					2.91754	0.000212407					10.2845	0.014433					2.91749	-9.85057e-05
			2.92276	0.00137149					2.9228	0.000189454					10.2898	0.0143492					2.92275	-0.000159812
			2.92803	0.00135475					2.92807	0.000166501					10.295	0.0141859					2.92802	-0.000187583
			2.93329	0.00135418					2.93334	0.000114823					10.3003	0.0140481					2.93328	-0.000177174
			2.93856	0.0013536					2.9386	-8.54681e-05					10.3056	0.0139948					2.93855	-0.000150691
			2.94382	0.000905532					2.94387	-0.000153214					10.3108	0.0139762					2.94382	-0.00010389
			2.94909	0.000478408					2.94913	-0.000107365					10.3161	0.0139894					2.94908	-8.51204e-05
			2.95436	0.000421319					2.9544	4.54335e-06					10.3214	0.0140029					2.95435	-7.60789e-05
			2.95962	0.00061358					2.95967	0.000165059					10.3266	0.0140016					2.95961	-7.84883e-05
			2.96489	0.000872419					2.96493	0.000230098					10.3319	0.0140003					2.96488	-8.08978e-05
			2.97015	0.00131475					2.9702	0.000254453					10.3372	0.0139247					2.97015	-7.75143e-05
			2.97542	0.0013264					2.97547	0.000242876					10.3424	0.0138765					2.97541	-7.17821e-05
			2.98069	0.00131462					2.98073	0.000231299					10.3477	0.0138512					2.98068	-8.11071e-05
			2.98595	0.00130284					2.986	0.000213545					10.353	0.0138376					2.98594	-9.04321e-05
			2.99122	0.00116436					2.99126	0.000208496					10.3582	0.0137966					2.99121	-0.000112851
			2.99648	0.00112488					2.99653	0.000203448					10.3635	0.0137077					2.99648	-0.000148007
			3.00175	0.00108195					3.0018	0.000157849					10.3688	0.0135743					3.00174	-0.000149074
			3.00702	0.00103903					3.00706	-7.2023e-05					10.374	0.0135022					3.00701	-0.000130658
			3.01228	0.00088714					3.01233	-0.000185983					10.3793	0.0135019					3.01227	-9.60729e-05
			3.01755	0.000518707					3.01759	-0.000158461					10.3846	0.0135262					3.01754	-4.68573e-05
			3.02281	0.000413691					3.02286	-6.78398e-05					10.3898	0.0135783					3.02281	-4.38933e-05
			3.02808	0.000542793					3.02813	5.74371e-05					10.3951	0.0135666					3.02807	-4.41059e-05
			3.03335	0.000761435					3.03339	0.000114033					10.4004	0.013555					3.03334	-4.43185e-05
			3.03861	0.0010885					3.03866	0.000128268					10.4056	0.0135302					3.0386	-5.30419e-05
			3.04388	0.00111943					3.04392	0.000106676					10.4109	0.0134914					3.04387	-5.60287e-05
			3.04914	0.00111406					3.04919	8.50835e-05					10.4162	0.0134561					3.04914	-5.55447e-05
			3.05441	0.00110869					3.05446	8.30585e-05					10.4214	0.0134367					3.0544	-6.16583e-05
			3.05968	0.00103322					3.05972	8.10336e-05					10.4267	0.0134289					3.05967	-6.77719e-05
			3.06494	0.00104515					3.06499	3.29656e-05					10.432	0.013378					3.06493	-0.000115794
			3.07021	0.00100844					3.07025	-1.51025e-05					10.4372	0.0132435					3.0702	-0.000130036
			3.07547	0.000971741					3.07552	-0.000109679					10.4425	0.0131548					3.07547	-0.00010961
			3.08074	0.000842112					3.08079	-0.000269958					10.4478	0.0131391					3.08073	-7.74315e-05
			3.08601	0.000418242					3.08605	-0.000280937					10.453	0.0131618					3.086	-4.20299e-05
			3.09127	0.000157613					3.09132	-0.000206516					10.4583	0.0132165					3.09126	-2.37661e-05
			3.09654	0.0002245					3.09658	-9.1913e-05					10.4636	0.0132433					3.09653	-1.81716e-05
			3.1018	0.000381503					3.10185	7.98695e-05					10.4688	0.0132493					3.1018	-2.14254e-05
			3.10707	0.000628071					3.10712	7.21173e-05					10.4741	0.013225					3.10706	-2.46793e-05
			3.11233	0.000755555					3.11238	6.43651e-05					10.4794	0.0132007					3.11233	-3.63539e-05
			3.1176	0.000781943					3.11765	2.62615e-05					10.4846	0.0131614					3.11759	-3.6311e-05
			3.12287	0.000723721					3.12291	-9.64965e-06					10.4899	0.0131405					3.12286	-3.62681e-05
			3.12813	0.000665499					3.12818	-1.51166e-05					10.4952	0.0131316					3.12813	-4.53994e-05
			3.1334	0.000586206					3.13345	-2.53061e-05					10.5004	0.0131227					3.13339	-0.00010543
			3.13866	0.000568008					3.13871	-3.54956e-05					10.5057	0.0130048					3.13866	-0.000138509
			3.14393	0.000561669					3.14398	-0.000108562					10.5109	0.0129047					3.14392	-0.000131969
			3.1492	0.000555331					3.14925	-0.00028635					10.5162	0.01289					3.14919	-0.000105368
			3.15446	3.94823e-05					3.15451	-0.000362523					10.5215	0.0129133					3.15446	-7.22704e-05
			3.15973	-0.000339644					3.15978	-0.000292249					10.5267	0.0129528					3.15972	-5.51336e-05
			3.16499	-0.00032851					3.16504	-0.000168043					10.532	0.0129819					3.16499	-4.83092e-05
			3.17026	-0.000181485					3.17031	-2.80809e-05					10.5373	0.0129948					3.17025	-4.14849e-05
			3.17553	7.83938e-05					3.17558	3.28902e-05					10.5425	0.0129689					3.17552	-4.07283e-05
			3.18079	0.000460358					3.18084	5.42533e-05					10.5478	0.012943					3.18079	-4.08306e-05
			3.18606	0.000441844					3.18611	5.39633e-05					10.5531	0.0129023					3.18605	-4.0933e-05
			3.19132	0.00042333					3.19137	5.09973e-05					10.5583	0.0128771					3.19132	-4.68408e-05
			3.19659	0.000380367					3.19664	4.80314e-05					10.5636	0.0128629					3.19658	-5.27485e-05
			3.20186	0.000259819					3.20191	8.61734e-05					10.5689	0.0128341					3.20185	-0.000101438
			3.20712	0.000184641					3.20717	3.45513e-05					10.5741	0.0127519					3.20712	-0.000136743
			3.21239	0.000130511					3.21244	-1.70708e-05					10.5794	0.0126474					3.21238	-0.000140974
			3.21765	7.63814e-05					3.2177	-0.00012125					10.5847	0.012574					3.21765	-0.000127658
			3.22292	-8.7753e-05					3.22297	-0.000233095					10.5899	0.0125561					3.22291	-9.43566e-05
			3.22819	-0.000534857					3.22824	-0.000151579					10.5952	0.0125561					3.22818	-4.25818e-05
			3.23345	-0.000660117					3.2335	-2.34405e-05					10.6005	0.0126022					3.23344	-4.48815e-05
			3.23872	-0.000501462					3.23877	0.000101093					10.6057	0.012588					3.23871	-4.71812e-05
			3.24398	-0.000316336					3.24403	0.000173061					10.611	0.0125738					3.24398	-5.47546e-05
			3.24925	-6.99491e-05					3.2493	0.000204221					10.6163	0.012535					3.24924	-5.73125e-05
			3.25452	-7.91999e-05					3.25457	0.000202693					10.6215	0.0124559					3.25451	-6.42443e-05
			3.25978	-8.84507e-05					3.25983	0.000191433					10.6268	0.0124016					3.25977	-7.22648e-05
			3.26505	-0.000160275					3.2651	0.000180172					10.6321	0.0123759					3.26504	-8.02853e-05
			3.27031	-0.000281948					3.27036	0.000178606					10.6373	0.0123437					3.27031	-0.000103249
			3.27558	-0.00031296					3.27563	0.000169528					10.6426	0.0122422					3.27557	-0.00015607
			3.28085	-0.000322742					3.2809	0.00016045					10.6479	0.0120898					3.28084	-0.000173016
			3.28611	-0.000332525					3.28616	-6.73568e-05					10.6531	0.0119863					3.2861	-0.00016067
			3.29138	-0.000631752					3.29143	-0.000186442					10.6584	0.0119538					3.29137	-0.000129753
			3.29664	-0.00110456					3.29669	-0.000177443					10.6637	0.0119618					3.29664	-8.33048e-05
			3.30191	-0.00132031					3.30196	-9.1936e-05					10.6689	0.0119994					3.3019	-7.8604e-05
			3.30718	-0.00128821					3.30723	1.85561e-05					10.6742	0.01198					3.30717	-7.66944e-05
			3.31244	-0.00109818					3.31249	0.000188051					10.6795	0.0119607					3.31243	-7.82496e-05
			3.31771	-0.000772419					3.31776	0.000188412					10.6847	0.0119188					3.3177	-7.98048e-05
			3.32297	-0.000653303					3.32303	0.000175798					10.69	0.011846					3.32297	-8.51542e-05
			3.32824	-0.000625622					3.32829	0.000163184					10.6953	0.0117924					3.32823	-7.98577e-05
			3.33351	-0.000686902					3.33356	0.00013893					10.7005	0.0117449					3.3335	-9.59546e-05
			3.33877	-0.000748183					3.33882	0.000124968					10.7058	0.0117076					3.33876	-0.000112052
			3.34404	-0.000813561					3.34409	9.71431e-05					10.7111	0.0116418					3.34403	-0.000145097
			3.3493	-0.000823899					3.34936	6.93182e-05					10.7163	0.0114809					3.3493	-0.000181029
			3.35457	-0.000834236					3.35462	4.01057e-07					10.7216	0.011336					3.35456	-0.000171913
			3.35984	-0.00088268					3.35989	-0.000153273					10.7269	0.011269					3.35983	-0.000139645
			3.3651	-0.0012882					3.36515	-0.000196975					10.7321	0.0112419					3.36509	-9.66022e-05
			3.37037	-0.00153326					3.37042	-0.000120955					10.7374	0.0112404					3.37036	-4.64409e-05
			3.37563	-0.00153222					3.37569	-1.75135e-06					10.7427	0.0112388					3.37563	-4.7265e-05
			3.3809	-0.00135254					3.38095	0.000182236					10.7479	0.0112276					3.38089	-4.8089e-05
			3.38617	-0.00103804					3.38622	0.000245679					10.7532	0.0111548					3.38616	-5.2937e-05
			3.39143	-0.000704928					3.39148	0.000243687					10.7584	0.01107					3.39142	-5.9396e-05
			3.3967	-0.000682583					3.39675	0.000241695					10.7637	0.0109774					3.39669	-5.59176e-05
			3.40196	-0.000679402					3.40202	0.000229487					10.769	0.0109002					3.40196	-6.78874e-05
			3.40723	-0.000691434					3.40728	0.000194732					10.7742	0.0108624					3.40722	-7.98571e-05
			3.4125	-0.000703465					3.41255	0.000196472					10.7795	0.0108158					3.41249	-0.000104617
			3.41776	-0.000740505					3.41781	0.000178335					10.7848	0.0106561					3.41775	-0.000142923
			3.42303	-0.000828289					3.42308	0.000160198					10.79	0.0104853					3.42302	-0.000140888
			3.42829	-0.000916074					3.42835	-4.27958e-05					10.7953	0.0103995					3.42829	-0.000114678
			3.43356	-0.00110467					3.43361	-0.000186912					10.8006	0.0103661					3.43355	-8.13504e-05
			3.43883	-0.00159439					3.43888	-0.000163387					10.8058	0.0103481					3.43882	-2.99724e-05
			3.44409	-0.00177797					3.44414	-4.44115e-05					10.8111	0.0103342					3.44408	-3.34436e-05
			3.44936	-0.00159199					3.44941	0.000114601					10.8164	0.0103204					3.44935	-3.69147e-05
			3.45462	-0.00124311					3.45468	0.000293275					10.8216	0.0102893					3.45462	-4.61717e-05
			3.45989	-0.000915053					3.45994	0.000293777					10.8269	0.0101949					3.45988	-5.12691e-05
			3.46516	-0.000869781					3.46521	0.000290488					10.8322	0.0100975					3.46515	-4.72972e-05
			3.47042	-0.000858575					3.47047	0.000287199					10.8374	0.0100181					3.47041	-5.23168e-05
			3.47569	-0.000927454					3.47574	0.000263347					10.8427	0.00995224					3.47568	-5.73364e-05
			3.48095	-0.000996334					3.48101	0.000245537					10.848	0.00988612					3.48095	-7.46673e-05
			3.48622	-0.00110524					3.48627	0.000231335					10.8532	0.00975156					3.48621	-0.000118437
			3.49149	-0.00112053					3.49154	0.000217134					10.8585	0.00957814					3.49148	-0.000134555
			3.49675	-0.00113582					3.4968	1.43587e-05					10.8638	0.00945654					3.49674	-0.000118343
			3.50202	-0.00124488					3.50207	-0.000160143					10.869	0.00941099					3.50201	-9.3006e-05
			3.50728	-0.00164789					3.50734	-0.000143045					10.8743	0.00938855					3.50728	-4.54059e-05
			3.51255	-0.00180258					3.5126	-4.5458e-05					10.8796	0.0093903					3.51254	-2.87844e-05
			3.51782	-0.00167833					3.51787	6.90277e-05					10.8848	0.00939103					3.51781	-3.04075e-05
			3.52308	-0.0014778					3.52314	0.000224509					10.8901	0.00934829					3.52307	-3.20307e-05
			3.52835	-0.00117429					3.5284	0.000216997					10.8954	0.00930556					3.52834	-3.56845e-05
			3.53361	-0.00102009					3.53367	0.000209484					10.9006	0.00933718					3.53361	-4.1293e-05
			3.53888	-0.000971108					3.53893	0.00018098					10.9059	0.00921539					3.53887	-4.44338e-05
			3.54415	-0.00101132					3.5442	0.000151686					10.9112	0.00909359					3.54414	-4.75747e-05
			3.54941	-0.00105154					3.54947	0.000169822					10.9164	0.00905221					3.5494	-5.7248e-05
			3.55468	-0.0011077					3.55473	0.000136494					10.9217	0.00895573					3.55467	-0.000107523
			3.55994	-0.00112195					3.56	0.000103166					10.927	0.00880193					3.55994	-0.000134678
			3.56521	-0.0011362					3.56526	2.31636e-05					10.9322	0.00864969					3.5652	-0.000127909
			3.57048	-0.00120904					3.57053	-0.000128348					10.9375	0.00857332					3.57047	-9.21524e-05
			3.57574	-0.00168681					3.5758	-0.000162077					10.9428	0.00854572					3.57573	-4.45588e-05
			3.58101	-0.0019668					3.58106	-0.00011519					10.948	0.00855834					3.581	-2.3954e-05
			3.58627	-0.00200714					3.58633	-5.15713e-05					10.9533	0.00855655					3.58627	-1.48345e-05
			3.59154	-0.00194031					3.59159	0.000112523					10.9586	0.00855476					3.59153	-1.31497e-05
			3.59681	-0.00167672					3.59686	0.00012974					10.9638	0.00852819					3.5968	-1.93123e-05
			3.60207	-0.00148932					3.60213	0.000129993					10.9691	0.00843733					3.60206	-2.5475e-05
			3.60734	-0.00140704					3.60739	0.000103553					10.9744	0.0083629					3.60733	-2.96737e-05
			3.6126	-0.00146074					3.61266	7.71127e-05					10.9796	0.00830669					3.6126	-4.27066e-05
			3.61787	-0.00151445					3.61792	7.76022e-05					10.9849	0.00828171					3.61786	-5.57396e-05
			3.62314	-0.00164111					3.62319	6.38768e-05					10.9901	0.00824573					3.62313	-8.37671e-05
			3.6284	-0.0017027					3.62846	5.01513e-05					10.9954	0.00812364					3.62839	-0.000128756
			3.63367	-0.00170315					3.63372	-1.10227e-05					11.0007	0.00796763					3.63366	-0.000124779
			3.63893	-0.0017036					3.63899	-0.000225465					11.0059	0.0078941					3.63892	-9.55509e-05
			3.6442	-0.00212007					3.64425	-0.000327708					11.0112	0.00788752					3.64419	-5.70257e-05
			3.64947	-0.00250533					3.64952	-0.000308084					11.0165	0.0078965					3.64946	-3.66087e-05
			3.65473	-0.00259734					3.65479	-0.000223237					11.0217	0.00790804					3.65472	-2.76451e-05
			3.66	-0.00246253					3.66005	-4.92463e-05					11.027	0.00790939					3.65999	-2.71766e-05
			3.66526	-0.00218682					3.66532	1.07815e-05					11.0323	0.00787346					3.66525	-2.68771e-05
			3.67053	-0.00179781					3.67058	2.00599e-05					11.0375	0.00783753					3.67052	-2.65776e-05
			3.6758	-0.00175178					3.67585	2.24649e-06					11.0428	0.00778377					3.67579	-2.34038e-05
			3.68106	-0.00173155					3.68112	-1.55669e-05					11.0481	0.00774798					3.68105	-3.15195e-05
			3.68633	-0.00173031					3.68638	-4.98603e-05					11.0533	0.00774242					3.68632	-3.96352e-05
			3.69159	-0.00175284					3.69165	-5.37027e-05					11.0586	0.00773324					3.69158	-6.03017e-05
			3.69686	-0.00177537					3.69692	-5.75452e-05					11.0639	0.00764736					3.69685	-0.000113778
			3.70213	-0.00176717					3.70218	-7.76389e-05					11.0691	0.00751296					3.70212	-0.000123122
			3.70739	-0.00178918					3.70745	-0.000247066					11.0744	0.00744371					3.70738	-9.68832e-05
			3.71266	-0.00181118					3.71271	-0.000390409					11.0797	0.00743667					3.71265	-6.15917e-05
			3.71792	-0.00222329					3.71798	-0.000403811					11.0849	0.0074559					3.71791	-1.44531e-05
			3.72319	-0.00240214					3.72325	-0.00030992					11.0902	0.00749902					3.72318	-1.24414e-05
			3.72846	-0.00226462					3.72851	-0.000195908					11.0955	0.00751373					3.72845	-1.47997e-05
			3.73372	-0.00200718					3.73378	-0.000138305					11.1007	0.00750474					3.73371	-1.71581e-05
			3.73899	-0.00171406					3.73904	-0.00011165					11.106	0.00749575					3.73898	-2.39517e-05
			3.74425	-0.00158575					3.74431	-0.00013863					11.1113	0.00743733					3.74424	-1.96538e-05
			3.74952	-0.00153311					3.74958	-0.00016561					11.1165	0.00740573					3.74951	-2.23103e-05
			3.75479	-0.00154546					3.75484	-0.000223676					11.1218	0.00740051					3.75478	-2.49668e-05
			3.76005	-0.00155781					3.76011	-0.00025911					11.1271	0.00738252					3.76004	-3.80482e-05
			3.76532	-0.00160028					3.76537	-0.000267354					11.1323	0.00736454					3.76531	-9.79479e-05
			3.77058	-0.00160911					3.77064	-0.000275599					11.1376	0.00726444					3.77057	-0.000126576
			3.77585	-0.00161794					3.77591	-0.000455419					11.1429	0.00719491					3.77584	-0.000109518
			3.78112	-0.00165196					3.78117	-0.000663063					11.1481	0.00718564					3.78111	-7.78436e-05
			3.78638	-0.00215888					3.78644	-0.00072471					11.1534	0.00722038					3.78637	-3.67413e-05
			3.79165	-0.00243661					3.7917	-0.000640879					11.1587	0.00728883					3.79164	-1.43939e-05
			3.79691	-0.00234496					3.79697	-0.000555972					11.1639	0.00737666					3.7969	-3.16683e-06
			3.80218	-0.00222301					3.80224	-0.000404265					11.1692	0.00737758					3.80217	-1.21256e-07
			3.80745	-0.00196975					3.8075	-0.000394823					11.1745	0.00737364					3.80744	1.35618e-06
			3.81271	-0.00174182					3.81277	-0.000405007					11.1797	0.00736971					3.8127	2.83361e-06
			3.81798	-0.00163657					3.81803	-0.000415192					11.185	0.00736097					3.81797	5.0616e-06
			3.82324	-0.00165441					3.8233	-0.000489511					11.1903	0.00735444					3.82323	5.95014e-06
			3.82851	-0.00167226					3.82857	-0.000486892					11.1955	0.00735136					3.8285	-1.87938e-05
			3.83378	-0.00170791					3.83383	-0.000495652					11.2008	0.00734829					3.83377	-4.35377e-05
			3.83904	-0.0016687					3.8391	-0.000504412					11.2061	0.00731768					3.83903	-9.04124e-05
			3.84431	-0.00174831					3.84436	-0.000575882					11.2113	0.00724356					3.8443	-9.47193e-05
			3.84957	-0.00182792					3.84963	-0.000780728					11.2166	0.00722008					3.84956	-6.81705e-05
			3.85484	-0.00200997					3.8549	-0.000850993					11.2219	0.00725225					3.85483	-2.58364e-05
			3.8601	-0.00234687					3.86016	-0.000805807					11.2271	0.00731795					3.8601	2.38765e-05
			3.86537	-0.0023796					3.86543	-0.000716304					11.2324	0.00740513					3.86536	3.47461e-05
			3.87064	-0.00219757					3.8707	-0.000572552					11.2376	0.00744178					3.87063	3.74644e-05
			3.8759	-0.00191701					3.87596	-0.000545641					11.2429	0.00745671					3.87589	3.33624e-05
			3.88117	-0.00147518					3.88123	-0.000540751					11.2482	0.00747163					3.88116	2.92605e-05
			3.88643	-0.00142436					3.88649	-0.000561419					11.2534	0.00748615					3.88643	2.53192e-05
			3.8917	-0.00140027					3.89176	-0.000582088					11.2587	0.00751386					3.89169	1.63213e-05
			3.89697	-0.00141463					3.89703	-0.00059095					11.264	0.00754825					3.89696	7.32332e-06
			3.90223	-0.001429					3.90229	-0.00059856					11.2692	0.00753092					3.90222	-1.73512e-05
			3.9075	-0.00144105					3.90756	-0.00060617					11.2745	0.00751358					3.90749	-7.01582e-05
			3.91276	-0.00147278					3.91282	-0.000646165					11.2798	0.00747471					3.91276	-7.70883e-05
			3.91803	-0.00150451					3.91809	-0.000878049					11.285	0.0074569					3.91802	-5.0186e-05
			3.9233	-0.00164703					3.92336	-0.0010243					11.2903	0.00751787					3.92329	-1.74347e-05
			3.92856	-0.00209359					3.92862	-0.00104263					11.2956	0.00760393					3.92855	2.12406e-05
			3.93383	-0.00226256					3.93389	-0.000975902					11.3008	0.00771089					3.93382	2.61529e-05
			3.93909	-0.00218902					3.93915	-0.000841714					11.3061	0.00784308					3.93909	2.6524e-05
			3.94436	-0.00193379					3.94442	-0.000751632					11.3114	0.00790841					3.94435	2.41811e-05
			3.94963	-0.00153843					3.94969	-0.000708326					11.3166	0.00791633					3.94962	2.18382e-05
			3.95489	-0.0013857					3.95495	-0.000724662					11.3219	0.00793822					3.95488	1.56567e-05
			3.96016	-0.00133477					3.96022	-0.000740998					11.3272	0.00797061					3.96015	1.41939e-05
			3.96542	-0.00135317					3.96548	-0.000784406					11.3324	0.00801665					3.96542	1.27311e-05
			3.97069	-0.00137157					3.97075	-0.000824362					11.3377	0.00805309					3.97068	1.55529e-06
			3.97596	-0.00142651					3.97602	-0.000839689					11.343	0.00806922					3.97595	-5.16167e-05
			3.98122	-0.00146457					3.98128	-0.000855017					11.3482	0.00808534					3.98121	-7.0542e-05
			3.98649	-0.00150264					3.98655	-0.00106124					11.3535	0.00809182					3.98648	-5.54141e-05
			3.99175	-0.00160391					3.99181	-0.00125208					11.3588	0.00816741					3.99175	-3.57295e-05
			3.99702	-0.00204729					3.99708	-0.00129026					11.364	0.00827215					3.99701	8.61976e-06
			4.00229	-0.00227576					4.00235	-0.00121081					11.3693	0.00840841					4.00228	3.50649e-05
			4.00755	-0.00223361					4.00761	-0.00109355					11.3746	0.0085458					4.00754	4.49527e-05
			4.01282	-0.00206099					4.01288	-0.000963121					11.3798	0.00865364					4.01281	4.12227e-05
			4.01808	-0.00175649					4.01814	-0.000960537					11.3851	0.00871728					4.01808	3.74927e-05
			4.02335	-0.00156179					4.02341	-0.00096901					11.3904	0.00877738					4.02334	3.51867e-05
			4.02862	-0.00146962					4.02868	-0.000977483					11.3956	0.0088706					4.02861	3.95839e-05
			4.03388	-0.00144849					4.03394	-0.00101972					11.4009	0.00896927					4.03387	4.09965e-05
			4.03915	-0.00147562					4.03921	-0.00104532					11.4062	0.00908266					4.03914	1.76066e-05
			4.04441	-0.00150274					4.04448	-0.00107785					11.4114	0.00915865					4.0444	-5.78324e-06
			4.04968	-0.00149832					4.04974	-0.00111037					11.4167	0.0091957					4.04967	-3.70493e-05
			4.05495	-0.00149701					4.05501	-0.00118551					11.422	0.00921889					4.05494	-3.16139e-05
			4.06021	-0.00171361					4.06027	-0.00138201					11.4272	0.00929274					4.0602	-8.01739e-06
			4.06548	-0.00193022					4.06554	-0.0014556					11.4325	0.00942614					4.06547	3.63959e-05
			4.07074	-0.00230468					4.07081	-0.00141728					11.4378	0.00961213					4.07073	6.352e-05
			4.07601	-0.00228483					4.07607	-0.00136819					11.443	0.00981756					4.076	7.70467e-05
			4.08128	-0.00211178					4.08134	-0.00125306					11.4483	0.0100093					4.08127	8.04659e-05
			4.08654	-0.00190592					4.0866	-0.00120641					11.4536	0.010114					4.08653	8.14259e-05
			4.09181	-0.00148665					4.09187	-0.00120713					11.4588	0.0102219					4.0918	8.11561e-05
			4.09707	-0.00148575					4.09714	-0.00125509					11.4641	0.0103529					4.09706	8.08864e-05
			4.10234	-0.0015176					4.1024	-0.00130304					11.4693	0.0104797					4.10233	7.1266e-05
			4.10761	-0.00154944					4.10767	-0.00132837					11.4746	0.0106443					4.1076	6.16457e-05
			4.11287	-0.00167303					4.11293	-0.0013325					11.4799	0.0108171					4.11286	4.11465e-05
			4.11814	-0.0016787					4.1182	-0.00133664					11.4851	0.0109175					4.11813	-1.31661e-05
			4.1234	-0.00172069					4.12347	-0.00136193					11.4904	0.0109969					4.12339	-2.23624e-05
			4.12867	-0.00176268					4.12873	-0.00155307					11.4957	0.0111279					4.12866	7.30531e-06
			4.13394	-0.00188394					4.134	-0.0016456					11.5009	0.0113198					4.13393	3.28878e-05
			4.1392	-0.00225695					4.13926	-0.00165301					11.5062	0.0115695					4.13919	7.01472e-05
			4.14447	-0.00236799					4.14453	-0.00157684					11.5115	0.0118306					4.14446	7.78555e-05
			4.14973	-0.0021989					4.1498	-0.00143005					11.5167	0.0121044					4.14972	8.16281e-05
			4.155	-0.00196823					4.15506	-0.00123579					11.522	0.0123105					4.15499	7.70379e-05
			4.16027	-0.00154588					4.16033	-0.00124378					11.5273	0.0125118					4.16026	7.24476e-05
			4.16553	-0.00136098					4.16559	-0.00125178					11.5325	0.0127132					4.16552	6.76742e-05
			4.1708	-0.00127581					4.17086	-0.00126846					11.5378	0.0129393					4.17079	6.50479e-05
			4.17606	-0.00123809					4.17613	-0.00127028					11.5431	0.0131856					4.17605	6.24215e-05
			4.18133	-0.00123326					4.18139	-0.00129615					11.5483	0.0134611					4.18132	4.33375e-05
			4.1866	-0.00122843					4.18666	-0.00130456					11.5536	0.0137281					4.18659	-1.5156e-06
			4.19186	-0.00120503					4.19192	-0.00131296					11.5589	0.0139327					4.19185	-1.15901e-05
			4.19713	-0.00130929					4.19719	-0.00148321					11.5641	0.0141406					4.19712	6.09914e-06
			4.20239	-0.00141354					4.20246	-0.00162625					11.5694	0.0144266					4.20238	3.2162e-05
			4.20766	-0.00163075					4.20772	-0.00165473					11.5747	0.0147784					4.20765	7.57757e-05
			4.21293	-0.00187897					4.21299	-0.0015883					11.5799	0.0151272					4.21292	9.71476e-05
			4.21819	-0.00175988					4.21826	-0.00146614					11.5852	0.0155389					4.21818	0.000105247
			4.22346	-0.00151507					4.22352	-0.0013469					11.5905	0.0158842					4.22345	0.00010441
			4.22872	-0.00121599					4.22879	-0.00135295					11.5957	0.0162194					4.22871	0.000103572
			4.23399	-0.00106896					4.23405	-0.00135899					11.601	0.0165294					4.23398	0.000102788
			4.23926	-0.00100574					4.23932	-0.00137522					11.6063	0.0168836					4.23925	0.000106017
			4.24452	-0.000985128					4.24459	-0.00139285					11.6115	0.0172397					4.24451	0.000104409
			4.24979	-0.000990375					4.24985	-0.0014163					11.6168	0.0176693					4.24978	0.0001028
			4.25505	-0.000995623					4.25512	-0.0014561					11.6221	0.0180481					4.25504	5.00922e-05
			4.26032	-0.000983488					4.26038	-0.0014959					11.6273	0.0183981					4.26031	2.80374e-05
			4.26559	-0.00105771					4.26565	-0.00157534					11.6326	0.018732					4.26558	3.8389e-05
			4.27085	-0.00113193					4.27092	-0.00177582					11.6379	0.0191447					4.27084	6.62052e-05
			4.27612	-0.00130757					4.27618	-0.00188002					11.6431	0.0196616					4.27611	0.000110644
			4.28138	-0.00162654					4.28145	-0.00183128					11.6484	0.0201985					4.28137	0.000135545
			4.28665	-0.00166926					4.28671	-0.00173332					11.6537	0.0207416					4.28664	0.000146762
			4.29192	-0.00148117					4.29198	-0.00158793					11.6589	0.0212639					4.29191	0.000148805
			4.29718	-0.00121293					4.29725	-0.00152658					11.6642	0.0217737					4.29717	0.000150848
			4.30245	-0.000851436					4.30251	-0.00150845					11.6695	0.0222422					4.30244	0.000159581
			4.30771	-0.000841825					4.30778	-0.00152655					11.6747	0.0227722					4.3077	0.00016148
			4.31298	-0.00086722					4.31304	-0.00154465					11.68	0.0233065					4.31297	0.000160952
			4.31825	-0.000892614					4.31831	-0.0015748					11.6853	0.023552					4.31824	0.000160424
			4.32351	-0.000984598					4.32358	-0.00158831					11.6905	0.0237975					4.3235	0.000120556
			4.32878	-0.00101509					4.32884	-0.00160181					11.6958	0.0243506					4.32877	8.11312e-05
			4.33404	-0.00104227					4.33411	-0.00163939					11.7011	0.0255534					4.33403	7.60719e-05
			4.33931	-0.00106945					4.33937	-0.00183112					11.7063	0.0261689					4.3393	9.54531e-05
			4.34458	-0.001218					4.34464	-0.00192081					11.7116	0.0267987					4.34457	0.000133364
			4.34984	-0.00163					4.34991	-0.00188228					11.7168	0.0274554					4.34983	0.000192253
			4.35511	-0.00174761					4.35517	-0.00177666					11.7221	0.0282185					4.3551	0.000194463
			4.36037	-0.001624					4.36044	-0.00164689					11.7274	0.02898					4.36036	0.000193469
			4.36564	-0.00143781					4.3657	-0.00157574					11.7326	0.0296663					4.36563	0.000192475
			4.37091	-0.00111111					4.37097	-0.00154706					11.7379	0.0303245					4.3709	0.000190428
			4.37617	-0.000998845					4.37624	-0.00156201					11.7432	0.0310656					4.37616	0.000188266
			4.38144	-0.000995806					4.3815	-0.00157696					11.7484	0.0317687					4.38143	0.000184551
			4.3867	-0.000999038					4.38677	-0.0015928					11.7537	0.0325531					4.38669	0.000180836
			4.39197	-0.00100227					4.39204	-0.00160042					11.759	0.0333004					4.39196	0.000169246
			4.39724	-0.00101177					4.3973	-0.00162812					11.7642	0.034097					4.39723	0.000111818
			4.4025	-0.00102864					4.40257	-0.00165582					11.7695	0.0348127					4.40249	9.18526e-05
			4.40777	-0.0011137					4.40783	-0.00190564					11.7748	0.0356179					4.40776	0.000107392
			4.41303	-0.00119877					4.4131	-0.00206122					11.78	0.0364156					4.41302	0.000135139
			4.4183	-0.00157767					4.41837	-0.00209647					11.7853	0.0373242					4.41829	0.000180516
			4.42357	-0.00188837					4.42363	-0.00205832					11.7906	0.0382304					4.42356	0.000187741
			4.42883	-0.00190822					4.4289	-0.00195183					11.7958	0.0392098					4.42882	0.00019119
			4.4341	-0.00166014					4.43416	-0.00176767					11.8011	0.0400805					4.43409	0.0001856
			4.43936	-0.00130413					4.43943	-0.00177402					11.8064	0.0409454					4.43935	0.000180011
			4.44463	-0.00113902					4.4447	-0.00178037					11.8116	0.0418997					4.44462	0.000172667
			4.4499	-0.00108252					4.44996	-0.00181421					11.8169	0.0428508					4.44988	0.000170687
			4.45516	-0.00110163					4.45523	-0.00186433					11.8222	0.0437794					4.45515	0.000168706
			4.46043	-0.00112073					4.46049	-0.0018789					11.8274	0.0447381					4.46042	0.000160713
			4.46569	-0.00111273					4.46576	-0.00191476					11.8327	0.045778					4.46568	0.000105262
			4.47096	-0.00110891					4.47103	-0.00195061					11.838	0.0466987					4.47095	6.69143e-05
			4.47623	-0.00114952					4.47629	-0.00202433					11.8432	0.0476847					4.47621	6.82235e-05
			4.48149	-0.00119013					4.48156	-0.00222108					11.8485	0.0486789					4.48148	9.96784e-05
			4.48676	-0.00160381					4.48682	-0.00227972					11.8538	0.0497975					4.48675	0.000141397
			4.49202	-0.001936					4.49209	-0.00222999					11.859	0.0508655					4.49201	0.000194105
			4.49729	-0.00195384					4.49736	-0.00213849					11.8643	0.0520185					4.49728	0.000195295
			4.50256	-0.00177274					4.50262	-0.00198421					11.8696	0.0531176					4.50254	0.000194568
			4.50782	-0.00151936					4.50789	-0.00193295					11.8748	0.0542731					4.50781	0.00019384
			4.51309	-0.0012378					4.51315	-0.00192007					11.8801	0.0553543					4.51308	0.00018325
			4.51835	-0.00124545					4.51842	-0.00192411					11.8854	0.0564141					4.51834	0.000189327
			4.52362	-0.0012531					4.52369	-0.00192815					11.8906	0.0576274					4.52361	0.000181721
			4.52889	-0.00130189					4.52895	-0.00196272					11.8959	0.0588654					4.52887	0.000174115
			4.53415	-0.00142789					4.53422	-0.00197421					11.9012	0.0600232					4.53414	0.000153238
			4.53942	-0.00146227					4.53948	-0.00198569					11.9064	0.0611558					4.53941	0.000114482
			4.54468	-0.00149699					4.54475	-0.00201397					11.9117	0.0623764					4.54467	0.000111743
			4.54995	-0.00153172					4.55002	-0.00222394					11.917	0.0635729					4.54994	0.000137363
			4.55522	-0.00173907					4.55528	-0.00232183					11.9222	0.0648899					4.5552	0.000180112
			4.56048	-0.00212895					4.56055	-0.00228491					11.9275	0.0661437					4.56047	0.00023186
			4.56575	-0.00221271					4.56581	-0.00219012					11.9328	0.0675275					4.56574	0.000233306
			4.57101	-0.00209419					4.57108	-0.00205382					11.938	0.0688537					4.571	0.000231387
			4.57628	-0.00185579					4.57635	-0.00189996					11.9433	0.0702473					4.57627	0.000229468
			4.58155	-0.00151132					4.58161	-0.00192126					11.9486	0.0715548					4.58153	0.000225313
			4.58681	-0.00146008					4.58688	-0.00194255					11.9538	0.0729296					4.5868	0.000223449
			4.59208	-0.00145508					4.59215	-0.00198883					11.9591	0.0742677					4.59207	0.000219831
			4.59734	-0.00151369					4.59741	-0.00202989					11.9643	0.0757228					4.59733	0.000216212
			4.60261	-0.00157231					4.60268	-0.00202772					11.9696	0.0771176					4.6026	0.000196872
			4.60787	-0.00155585					4.60794	-0.00202784					11.9749	0.078516					4.60786	0.000143428
			4.61314	-0.00155244					4.61321	-0.00214051					11.9801	0.0800448					4.61313	0.000124998
			4.61841	-0.00161686					4.61848	-0.00225319					11.9854	0.0815682					4.6184	0.000139501
			4.62367	-0.00168128					4.62374	-0.00240958					11.9907	0.0830096					4.62366	0.000169001
			4.62894	-0.00212444					4.62901	-0.00240872					11.9959	0.0845384					4.62893	0.000216695
			4.6342	-0.00226562					4.63427	-0.00234143					12.0012	0.0862162					4.63419	0.000217494
			4.63947	-0.00218111					4.63954	-0.00221462					12.0065	0.0878276					4.63946	0.000215106
			4.64474	-0.002013					4.64481	-0.00202847					12.0117	0.0895735					4.64473	0.000212718
			4.65	-0.00166829					4.65007	-0.00204092					12.017	0.0913953					4.64999	0.000209517
			4.65527	-0.00154309					4.65534	-0.00205337					12.0223	0.0932989					4.65526	0.000201807
			4.66053	-0.00151024					4.6606	-0.0020902					12.0275	0.0949674					4.66052	0.000198528
			4.6658	-0.00157554					4.66587	-0.00209397					12.0328	0.0967796					4.66579	0.00018824
			4.67107	-0.00164085					4.67114	-0.00209467					12.0381	0.0987611					4.67106	0.000177953
			4.67633	-0.00169089					4.6764	-0.00212434					12.0433	0.100909					4.67632	0.000115356
			4.6816	-0.00168434					4.68167	-0.00215401					12.0486	0.102754					4.68159	8.46545e-05
			4.68686	-0.00168102					4.68693	-0.00223128					12.0539	0.104571					4.68685	0.000102562
			4.69213	-0.00188218					4.6922	-0.00241013					12.0591	0.106586					4.69212	0.000127507
			4.6974	-0.00208334					4.69747	-0.00245529					12.0644	0.10866					4.69739	0.000165234
			4.70266	-0.0024837					4.70273	-0.00241213					12.0697	0.110697					4.70265	0.000186525
			4.70793	-0.00250743					4.708	-0.00234203					12.0749	0.112794					4.70792	0.000195876
			4.71319	-0.00234446					4.71326	-0.0022117					12.0802	0.115208					4.71318	0.000191377
			4.71846	-0.00207589					4.71853	-0.00220295					12.0855	0.117499					4.71845	0.000186877
			4.72373	-0.0019211					4.7238	-0.00221021					12.0907	0.119837					4.72372	0.000174222
			4.72899	-0.00184492					4.72906	-0.00221747					12.096	0.121993					4.72898	0.000176869
			4.73426	-0.00185905					4.73433	-0.00223086					12.1013	0.124367					4.73425	0.000163962
			4.73952	-0.00187318					4.73959	-0.00226486					12.1065	0.126726					4.73951	0.000151055
			4.74479	-0.00195737					4.74486	-0.00227118					12.1118	0.129257					4.74478	0.000120651
			4.75006	-0.00201369					4.75013	-0.00230645					12.1171	0.131765					4.75005	7.85846e-05
			4.75532	-0.00210758					4.75539	-0.00234171					12.1223	0.134452					4.75531	7.80475e-05
			4.76059	-0.00220147					4.76066	-0.00255029					12.1276	0.137011					4.76058	0.000103607
			4.76585	-0.00241328					4.76593	-0.00267942					12.1329	0.139787					4.76584	0.000146091
			4.77112	-0.00284006					4.77119	-0.00266335					12.1381	0.142519					4.77111	0.000196454
			4.77639	-0.00295515					4.77646	-0.00257637					12.1434	0.145267					4.77638	0.000198998
			4.78165	-0.00285277					4.78172	-0.00243476					12.1487	0.148377					4.78164	0.000198513
			4.78692	-0.00265903					4.78699	-0.00238237					12.1539	0.151717					4.78691	0.000198028
			4.79218	-0.00234008					4.79226	-0.0023734					12.1592	0.154869					4.79217	0.000197023
			4.79745	-0.00229943					4.79752	-0.00239012					12.1645	0.157936					4.79744	0.000196462
			4.80272	-0.00229068					4.80279	-0.00240684					12.1697	0.161295					4.80271	0.000191863
			4.80798	-0.00234354					4.80805	-0.00244739					12.175	0.164506					4.80797	0.000187264
			4.81325	-0.0023964					4.81332	-0.00246626					12.1803	0.168017					4.81324	0.000146689
			4.81851	-0.00243626					4.81859	-0.00251571					12.1855	0.171531					4.8185	9.78798e-05
			4.82378	-0.00242652					4.82385	-0.00256516					12.1908	0.175343					4.82377	7.67933e-05
			4.82905	-0.00246104					4.82912	-0.00267117					12.196	0.178969					4.82904	8.61552e-05
			4.83431	-0.00249557					4.83438	-0.00278072					12.2013	0.18283					4.8343	0.000122974
			4.83958	-0.00292519					4.83965	-0.00275802					12.2066	0.186662					4.83957	0.000181758
			4.84484	-0.00306897					4.84492	-0.00267781					12.2118	0.190515					4.84483	0.000185719
			4.85011	-0.0029687					4.85018	-0.00256185					12.2171	0.19477					4.8501	0.000185406
			4.85538	-0.00274823					4.85545	-0.00240863					12.2224	0.198849					4.85537	0.000185093
			4.86064	-0.0023862					4.86071	-0.00241228					12.2276	0.20343					4.86063	0.000182257
			4.86591	-0.00225665					4.86598	-0.00241594					12.2329	0.207714					4.8659	0.000179674
			4.87117	-0.00222036					4.87125	-0.00244559					12.2382	0.212442					4.87116	0.000174651
			4.87644	-0.00223815					4.87651	-0.00248579					12.2434	0.216935					4.87643	0.000169629
			4.88171	-0.00225594					4.88178	-0.00249998					12.2487	0.221877					4.88169	0.000158795
			4.88697	-0.00225484					4.88704	-0.00253982					12.254	0.226783					4.88696	0.000100248
			4.89224	-0.00227932					4.89231	-0.00257965					12.2592	0.232281					4.89223	6.58365e-05
			4.8975	-0.00230379					4.89758	-0.00266486					12.2645	0.237365					4.89749	7.39792e-05
			4.90277	-0.00235385					4.90284	-0.0028243					12.2698	0.242787					4.90276	9.71906e-05
			4.90804	-0.00279379					4.90811	-0.00288224					12.275	0.248572					4.90802	0.000133835
			4.9133	-0.00316612					4.91337	-0.00284496					12.2803	0.255058					4.91329	0.000140508
			4.91857	-0.00324679					4.91864	-0.00273451					12.2856	0.260789					4.91856	0.000142865
			4.92383	-0.00310354					4.92391	-0.00255399					12.2908	0.266398					4.92382	0.000139439
			4.9291	-0.00280141					4.92917	-0.00251467					12.2961	0.272762					4.92909	0.000136013
			4.93437	-0.00262207					4.93444	-0.00249605					12.3014	0.279145					4.93435	0.000128266
			4.93963	-0.00255649					4.93971	-0.00251331					12.3066	0.285223					4.93962	0.000128024
			4.9449	-0.00257445					4.94497	-0.00253057					12.3119	0.291429					4.94489	0.000114392
			4.95016	-0.00259242					4.95024	-0.00252381					12.3172	0.298474					4.95015	0.00010076
			4.95543	-0.00265583					4.9555	-0.00253668					12.3224	0.305135					4.95542	7.16152e-05
			4.9607	-0.00271624					4.96077	-0.00254955					12.3277	0.312462					4.96068	3.61431e-05
			4.96596	-0.00271996					4.96604	-0.00261868					12.333	0.319578					4.96595	3.31757e-05
			4.97123	-0.00281806					4.9713	-0.00282563					12.3382	0.327036					4.97122	5.31055e-05
			4.97649	-0.00316833					4.97657	-0.0029073					12.3435	0.333994					4.97648	8.62806e-05
			4.98176	-0.00356606					4.98183	-0.00285338					12.3488	0.341665					4.98175	0.000127178
			4.98703	-0.00361441					4.9871	-0.0027546					12.354	0.348965					4.98701	0.000129429
			4.99229	-0.00345379					4.99237	-0.00261108					12.3593	0.356812					4.99228	0.000128216
			4.99756	-0.00322026					4.99763	-0.00253152					12.3646	0.364619					4.99755	0.000127002
			5.00282	-0.00288206					5.0029	-0.00252257					12.3698	0.372601					5.00281	0.000112938
			5.00809	-0.00284792					5.00816	-0.00252025					12.3751	0.381297					5.00808	0.000105238
			5.01336	-0.00284013					5.01343	-0.00252124					12.3804	0.389266					5.01334	0.000101595
			5.01862	-0.00288638					5.0187	-0.00252223					12.3856	0.398104					5.01861	9.79519e-05
			5.02389	-0.00293263					5.02396	-0.00251471					12.3909	0.406395					5.02388	7.51462e-05
			5.02915	-0.00302243					5.02923	-0.00251402					12.3962	0.415764					5.02914	2.14293e-05
			5.03442	-0.00303345					5.03449	-0.00261821					12.4014	0.424738					5.03441	1.21756e-05
			5.03969	-0.00304447					5.03976	-0.0027224					12.4067	0.434298					5.03967	3.02177e-05
			5.04495	-0.00313753					5.04503	-0.00285237					12.412	0.442978					5.04494	5.77414e-05
			5.05022	-0.00366426					5.05029	-0.00283255					12.4172	0.452435					5.05021	0.000103628
			5.05548	-0.00386629					5.05556	-0.00276177					12.4225	0.461503					5.05547	0.000107139
			5.06075	-0.00379805					5.06082	-0.00265456					12.4278	0.471203					5.06074	0.000106009
			5.06602	-0.00363019					5.06609	-0.00258253					12.433	0.480477					5.066	0.000104879
			5.07128	-0.00337782					5.07136	-0.00255025					12.4383	0.490674					5.07127	9.73412e-05
			5.07655	-0.0032609					5.07662	-0.00256311					12.4435	0.500285					5.07654	9.94291e-05
			5.08181	-0.00321788					5.08189	-0.00257597					12.4488	0.51046					5.0818	9.6061e-05
			5.08708	-0.00329117					5.08715	-0.00264803					12.4541	0.520243					5.08707	9.26929e-05
			5.09235	-0.00336445					5.09242	-0.00269369					12.4593	0.530043					5.09233	6.9236e-05
			5.09761	-0.00341846					5.09769	-0.00269894					12.4646	0.54099					5.0976	1.94282e-05
			5.10288	-0.00341986					5.10295	-0.0027042					12.4699	0.552105					5.10287	-1.97231e-06
			5.10814	-0.00342125					5.10822	-0.00279504					12.4751	0.562445					5.10813	5.62782e-06
			5.11341	-0.00348614					5.11349	-0.00299254					12.4804	0.572326					5.1134	2.61861e-05
			5.11868	-0.0039667					5.11875	-0.00300818					12.4857	0.58316					5.11866	6.41515e-05
			5.12394	-0.00425707					5.12402	-0.00290601					12.4909	0.593197					5.12393	7.07729e-05
			5.12921	-0.00419717					5.12928	-0.00280756					12.4962	0.603849					5.1292	7.27781e-05
			5.13447	-0.00407711					5.13455	-0.00264049					12.5015	0.614135					5.13446	7.06621e-05
			5.13974	-0.00378951					5.13982	-0.00258284					12.5067	0.625405					5.13973	6.85462e-05
			5.14501	-0.00357907					5.14508	-0.00255884					12.512	0.635672					5.14499	6.6815e-05
			5.15027	-0.00347735					5.15035	-0.00255846					12.5173	0.645782					5.15026	6.4836e-05
			5.15554	-0.00346536					5.15561	-0.00255809					12.5225	0.656881					5.15553	5.84722e-05
			5.1608	-0.00347171					5.16088	-0.00255031					12.5278	0.667795					5.16079	5.21084e-05
			5.16607	-0.00347805					5.16615	-0.00253479					12.5331	0.678216					5.16606	-1.28172e-08
			5.17134	-0.00352032					5.17141	-0.00254437					12.5383	0.688826					5.17132	-4.31614e-05
			5.1766	-0.00352594					5.17668	-0.00255395					12.5436	0.700275					5.17659	-4.61642e-05
			5.18187	-0.00353156					5.18194	-0.00274696					12.5489	0.710326					5.18186	-2.22749e-05
			5.18713	-0.00391345					5.18721	-0.00279041					12.5541	0.72071					5.18712	1.19804e-05
			5.1924	-0.00426797					5.19248	-0.00270235					12.5594	0.730193					5.19239	6.37887e-05
			5.19767	-0.00436555					5.19774	-0.00261296					12.5647	0.740629					5.19765	6.14893e-05
			5.20293	-0.00420943					5.20301	-0.00246014					12.5699	0.750264					5.20292	5.91899e-05
			5.2082	-0.00398601					5.20827	-0.00238933					12.5752	0.760967					5.20819	5.35663e-05
			5.21346	-0.00366561					5.21354	-0.0023658					12.5805	0.770777					5.21345	4.30132e-05
			5.21873	-0.00369194					5.21881	-0.00237289					12.5857	0.780987					5.21872	3.69019e-05
			5.224	-0.00371827					5.22407	-0.00237998					12.591	0.790534					5.22398	3.67414e-05
			5.22926	-0.00377535					5.22934	-0.00237655					12.5963	0.800626					5.22925	3.65809e-05
			5.23453	-0.00377623					5.2346	-0.00237983					12.6015	0.809794					5.23452	-1.06648e-05
			5.23979	-0.00386264					5.23987	-0.00238312					12.6068	0.819819					5.23978	-5.2017e-05
			5.24506	-0.00391012					5.24514	-0.00241758					12.6121	0.829236					5.24505	-5.37219e-05
			5.25033	-0.00395761					5.2504	-0.00262797					12.6173	0.83863					5.25031	-3.16206e-05
			5.25559	-0.00409617					5.25567	-0.00276065					12.6226	0.84719					5.25558	-5.85648e-07
			5.26086	-0.00453817					5.26093	-0.00274821					12.6279	0.855547					5.26085	4.19171e-05
			5.26612	-0.00476135					5.2662	-0.00267442					12.6331	0.864524					5.26611	5.84836e-05
			5.27139	-0.00466997					5.27147	-0.00252337					12.6384	0.873294					5.27138	5.88313e-05
			5.27666	-0.00442833					5.27673	-0.0023417					12.6437	0.881571					5.27664	5.83777e-05
			5.28192	-0.00414428					5.282	-0.00235371					12.6489	0.889502					5.28191	5.7924e-05
			5.28719	-0.00409175					5.28727	-0.00236572					12.6542	0.897721					5.28717	5.60122e-05
			5.29245	-0.00408147					5.29253	-0.00238949					12.6595	0.904845					5.29244	4.87844e-05
			5.29772	-0.00414007					5.2978	-0.00240369					12.6647	0.912248					5.29771	4.15566e-05
			5.30299	-0.00419866					5.30306	-0.00240323					12.67	0.919006					5.30297	1.87031e-05
			5.30825	-0.00428013					5.30833	-0.00241124					12.6752	0.926221					5.30824	-3.80838e-05
			5.31352	-0.00431017					5.3136	-0.00241925					12.6805	0.932877					5.3135	-5.20973e-05
			5.31878	-0.0043402					5.31886	-0.00249791					12.6858	0.939435					5.31877	-3.84509e-05
			5.32405	-0.00440918					5.32413	-0.00266011					12.691	0.945074					5.32404	-1.61486e-05
			5.32931	-0.00490584					5.32939	-0.00267071					12.6963	0.950805					5.3293	2.92313e-05
			5.33458	-0.00519509					5.33466	-0.00257895					12.7016	0.956009					5.33457	5.19384e-05
			5.33985	-0.00517468					5.33993	-0.00244512					12.7068	0.960781					5.33983	5.97588e-05
			5.34511	-0.00501785					5.34519	-0.00228087					12.7121	0.965735					5.3451	6.11432e-05
			5.35038	-0.00477542					5.35046	-0.00224726					12.7174	0.970081					5.35037	6.13303e-05
			5.35564	-0.00444667					5.35572	-0.0022462					12.7226	0.974422					5.35563	6.15175e-05
			5.36091	-0.0044326					5.36099	-0.00225201					12.7279	0.978065					5.3609	6.05075e-05
			5.36618	-0.00443696					5.36626	-0.00225781					12.7332	0.981786					5.36616	5.73765e-05
			5.37144	-0.00444133					5.37152	-0.00226832					12.7384	0.984931					5.37143	5.42456e-05
			5.37671	-0.00452842					5.37679	-0.00226916					12.7437	0.988007					5.3767	1.90683e-06
			5.38197	-0.0045284					5.38205	-0.00228853					12.749	0.990566					5.38196	-3.15799e-05
			5.38724	-0.00462461					5.38732	-0.00230789					12.7542	0.992968					5.38723	-2.37587e-05
			5.39251	-0.00472082					5.39259	-0.00252168					12.7595	0.994864					5.39249	4.09342e-07
			5.39777	-0.00492543					5.39785	-0.00262878					12.7648	0.996576					5.39776	4.61151e-05
			5.40304	-0.00531689					5.40312	-0.00258075					12.77	0.997926					5.40303	6.88189e-05
			5.4083	-0.0054227					5.40838	-0.00248365					12.7753	0.999069					5.40829	7.92424e-05
			5.41357	-0.00528339					5.41365	-0.00230795					12.7806	0.999802					5.41356	8.13941e-05
			5.41884	-0.00500897					5.41892	-0.00222083					12.7858	0.999964					5.41882	8.11373e-05
			5.4241	-0.00457567					5.42418	-0.00217857					12.7911	1					5.42409	8.08806e-05
			5.42937	-0.00454154					5.42945	-0.00217421					12.7964	0.999749					5.42936	7.45495e-05
			5.43463	-0.00454479					5.43471	-0.00218345					12.8016	0.999497					5.43462	6.34203e-05
			5.4399	-0.00454804					5.43998	-0.0021927					12.8069	0.998675					5.43989	5.22911e-05
			5.44517	-0.00465731					5.44525	-0.00219217					12.8122	0.997589					5.44515	2.9609e-05
			5.45043	-0.00470003					5.45051	-0.0022012					12.8174	0.996112					5.45042	-1.80703e-05
			5.4557	-0.00474803					5.45578	-0.00221022					12.8227	0.994159					5.45569	-2.81152e-05
			5.46096	-0.00479603					5.46105	-0.00238735					12.828	0.992155					5.46095	-5.68327e-06
			5.46623	-0.0049349					5.46631	-0.00248261					12.8332	0.989797					5.46622	1.99589e-05
			5.4715	-0.00528375					5.47158	-0.00243464					12.8385	0.987323					5.47148	6.03706e-05
			5.47676	-0.00543917					5.47684	-0.00234017					12.8438	0.984461					5.47675	6.37895e-05
			5.48203	-0.00539791					5.48211	-0.00219148					12.849	0.981566					5.48202	6.26758e-05
			5.48729	-0.00517812					5.48738	-0.00199804					12.8543	0.978027					5.48728	6.15622e-05
			5.49256	-0.00483089					5.49264	-0.00200215					12.8596	0.974329					5.49255	4.37168e-05
			5.49783	-0.00481647					5.49791	-0.00200626					12.8648	0.970219					5.49781	3.55251e-05
			5.50309	-0.00483874					5.50317	-0.00201953					12.8701	0.966099					5.50308	3.64397e-05
			5.50836	-0.00486102					5.50844	-0.00199691					12.8754	0.961801					5.50835	3.01015e-05
			5.51362	-0.00497007					5.51371	-0.00195593					12.8806	0.956929					5.51361	2.37633e-05
			5.51889	-0.00502602					5.51897	-0.00197705					12.8859	0.952024					5.51888	-3.46731e-05
			5.52416	-0.00502914					5.52424	-0.00199817					12.8912	0.946222					5.52414	-5.92378e-05
			5.52942	-0.00506463					5.5295	-0.00205287					12.8964	0.940801					5.52941	-4.01555e-05
			5.53469	-0.00510012					5.53477	-0.00217357					12.9017	0.934939					5.53468	-8.425e-06
			5.53995	-0.00555372					5.54004	-0.00218866					12.907	0.92922					5.53994	3.33074e-05
			5.54522	-0.00585268					5.5453	-0.00214582					12.9122	0.922878					5.54521	5.38939e-05
			5.55049	-0.0058269					5.55057	-0.00204898					12.9175	0.917141					5.55047	5.36019e-05
			5.55575	-0.00566605					5.55583	-0.00187612					12.9227	0.910636					5.55574	5.33098e-05
			5.56102	-0.00540072					5.5611	-0.00185136					12.928	0.903999					5.56101	5.01467e-05
			5.56628	-0.00522345					5.56637	-0.00184517					12.9333	0.89679					5.56627	5.41247e-05
			5.57155	-0.00513559					5.57163	-0.00187092					12.9385	0.889859					5.57154	5.42118e-05
			5.57682	-0.00516842					5.5769	-0.00189667					12.9438	0.882268					5.5768	5.42988e-05
			5.58208	-0.00520124					5.58216	-0.00192506					12.9491	0.875011					5.58207	4.77388e-05
			5.58735	-0.00534978					5.58743	-0.00192448					12.9543	0.866844					5.58734	-9.21456e-06
			5.59261	-0.00537562					5.5927	-0.00195469					12.9596	0.858741					5.5926	-8.1583e-06
			5.59788	-0.00547033					5.59796	-0.00198491					12.9649	0.850957					5.59787	9.70131e-07
			5.60315	-0.00556504					5.60323	-0.00219025					12.9701	0.842759					5.60313	1.00986e-05
			5.60841	-0.00578899					5.60849	-0.00225558					12.9754	0.834688					5.6084	3.30975e-05
			5.61368	-0.00613998					5.61376	-0.00218005					12.9807	0.826904					5.61367	5.18544e-05
			5.61894	-0.0061424					5.61903	-0.00204931					12.9859	0.819335					5.61893	6.02159e-05
			5.62421	-0.00601729					5.62429	-0.00188892					12.9912	0.81096					5.6242	5.70031e-05
			5.62948	-0.00580367					5.62956	-0.00172735					12.9965	0.802786					5.62946	5.37904e-05
			5.63474	-0.00542745					5.63482	-0.00173349					13.0017	0.793914					5.63473	4.89698e-05
			5.64001	-0.00544162					5.64009	-0.00173962					13.007	0.785641					5.64	4.67753e-05
			5.64527	-0.00545579					5.64536	-0.0017544					13.0123	0.776732					5.64526	4.64196e-05
			5.65054	-0.00553396					5.65062	-0.00177842					13.0175	0.768525					5.65053	4.60639e-05
			5.65581	-0.00565106					5.65589	-0.00176553					13.0228	0.76022					5.65579	-9.51681e-06
			5.66107	-0.00570201					5.66116	-0.0017652					13.0281	0.750691					5.66106	-5.43566e-05
			5.66634	-0.0057622					5.66642	-0.00186991					13.0333	0.741143					5.66633	-5.86458e-05
			5.6716	-0.00582239					5.67169	-0.00197463					13.0386	0.732438					5.67159	-3.63423e-05
			5.67687	-0.00597765					5.67695	-0.00208488					13.0439	0.724351					5.67686	-6.9404e-07
			5.68214	-0.00638463					5.68222	-0.00204088					13.0491	0.715678					5.68212	4.51911e-05
			5.6874	-0.00650396					5.68749	-0.00192925					13.0544	0.707604					5.68739	4.14978e-05
			5.69267	-0.00632909					5.69275	-0.00178144					13.0597	0.698662					5.69265	3.78046e-05
			5.69793	-0.00606896					5.69802	-0.00160071					13.0649	0.690069					5.69792	2.54451e-05
			5.7032	-0.00574945					5.70328	-0.001606					13.0702	0.680528					5.70319	1.49784e-05
			5.70847	-0.00572634					5.70855	-0.00161129					13.0755	0.671859					5.70845	1.79085e-05
			5.71373	-0.00573128					5.71382	-0.0016299					13.0807	0.662512					5.71372	1.51332e-05
			5.719	-0.00573621					5.71908	-0.00163375					13.086	0.654001					5.71898	1.23578e-05
			5.72426	-0.0057425					5.72435	-0.00163113					13.0913	0.644926					5.72425	-2.08862e-06
			5.72953	-0.00572965					5.72961	-0.00163667					13.0965	0.635927					5.72952	-5.84216e-05
			5.7348	-0.00573197					5.73488	-0.00164221					13.1018	0.626067					5.73478	-8.74928e-05
			5.74006	-0.00573429					5.74015	-0.00180311					13.1071	0.617356					5.74005	-7.04585e-05
			5.74533	-0.00581033					5.74541	-0.00191861					13.1123	0.608457					5.74531	-3.55018e-05
			5.75059	-0.0062432					5.75068	-0.00193169					13.1176	0.600058					5.75058	3.04178e-06
			5.75586	-0.00650991					5.75594	-0.00185707					13.1229	0.591277					5.75585	1.87452e-05
			5.76113	-0.00650065					5.76121	-0.0017311					13.1281	0.583147					5.76111	1.82062e-05
			5.76639	-0.00633096					5.76648	-0.00154619					13.1334	0.57494					5.76638	1.76672e-05
			5.77166	-0.00597967					5.77174	-0.00154101					13.1387	0.565746					5.77164	1.58913e-05
			5.77692	-0.00585351					5.77701	-0.00154586					13.1439	0.556936					5.77691	1.03343e-05
			5.78219	-0.00581776					5.78227	-0.00155071					13.1492	0.548743					5.78218	9.19145e-06
			5.78746	-0.00586059					5.78754	-0.00156533					13.1545	0.540686					5.78744	5.52004e-06
			5.79272	-0.00590341					5.79281	-0.00156391					13.1597	0.532029					5.79271	-2.04601e-05
			5.79799	-0.0059068					5.79807	-0.00158125					13.165	0.523876					5.79797	-7.70611e-05
			5.80325	-0.00591019					5.80334	-0.00159859					13.1702	0.514798					5.80324	-0.000105851
			5.80852	-0.00595527					5.8086	-0.00167038					13.1755	0.506451					5.80851	-9.43888e-05
			5.81379	-0.00600034					5.81387	-0.00183747					13.1808	0.498101					5.81377	-7.02948e-05
			5.81905	-0.00644038					5.81914	-0.00188434					13.186	0.490576					5.81904	-3.33334e-05
			5.82432	-0.00676147					5.8244	-0.00184513					13.1913	0.483092					5.8243	2.32963e-05
			5.82958	-0.00675251					5.82967	-0.00175991					13.1966	0.475136					5.82957	2.18293e-05
			5.83485	-0.00653107					5.83494	-0.00159105					13.2018	0.467277					5.83484	2.03623e-05
			5.84012	-0.00630789					5.8402	-0.00156866					13.2071	0.459614					5.8401	1.26547e-05
			5.84538	-0.00599928					5.84547	-0.00156061					13.2124	0.452143					5.84537	8.41297e-06
			5.85065	-0.00597427					5.85073	-0.00155257					13.2176	0.444244					5.85063	1.7212e-05
			5.85591	-0.00597059					5.856	-0.00152838					13.2229	0.43708					5.8559	6.43763e-06
			5.86118	-0.00600616					5.86127	-0.00152636					13.2282	0.429422					5.86117	-4.33676e-06
			5.86645	-0.00604174					5.86653	-0.00153065					13.2334	0.422403					5.86643	-3.0083e-05
			5.87171	-0.00606888					5.8718	-0.00153495					13.2387	0.414478					5.8717	-6.72601e-05
			5.87698	-0.00613909					5.87706	-0.00156476					13.244	0.407146					5.87696	-6.46275e-05
			5.88224	-0.0062093					5.88233	-0.00178483					13.2492	0.399707					5.88223	-4.25316e-05
			5.88751	-0.0063773					5.8876	-0.00190154					13.2545	0.393186					5.8875	-9.05327e-07
			5.89278	-0.00676698					5.89286	-0.00186589					13.2598	0.386207					5.89276	4.96842e-05
			5.89804	-0.00686338					5.89813	-0.00176041					13.265	0.379783					5.89803	5.00459e-05
			5.90331	-0.00680612					5.90339	-0.00160044					13.2703	0.372834					5.90329	4.77414e-05
			5.90857	-0.00663231					5.90866	-0.00139667					13.2756	0.366185					5.90856	4.54368e-05
			5.91384	-0.00623271					5.91393	-0.00140132					13.2808	0.359244					5.91383	3.96187e-05
			5.91911	-0.00614199					5.91919	-0.00140598					13.2861	0.352937					5.91909	4.032e-05
			5.92437	-0.00609768					5.92446	-0.00142208					13.2914	0.346434					5.92436	3.35438e-05
			5.92964	-0.00610813					5.92972	-0.00145094					13.2966	0.340442					5.92962	2.67676e-05
			5.9349	-0.00611859					5.93499	-0.00145416					13.3019	0.334438					5.93489	1.03243e-05
			5.94017	-0.00611712					5.94026	-0.00145738					13.3072	0.327824					5.94016	-3.5471e-05
			5.94544	-0.00614282					5.94552	-0.00146487					13.3124	0.321183					5.94542	-5.27142e-05
			5.9507	-0.00616853					5.95079	-0.00166383					13.3177	0.315317					5.95069	-3.96971e-05
			5.95597	-0.00622841					5.95605	-0.00179051					13.323	0.309708					5.95595	-1.08112e-05
			5.96123	-0.00666336					5.96132	-0.00175446					13.3282	0.303893					5.96122	3.34743e-05
			5.9665	-0.00682432					5.96659	-0.00168673					13.3335	0.298324					5.96649	4.64788e-05
			5.97177	-0.00668078					5.97185	-0.00161106					13.3388	0.29259					5.97175	4.83216e-05
			5.97703	-0.00654119					5.97712	-0.00143685					13.344	0.287252					5.97702	4.10946e-05
			5.9823	-0.00622022					5.98238	-0.00143641					13.3493	0.281506					5.98228	3.38677e-05
			5.98756	-0.00606956					5.98765	-0.00145027					13.3546	0.276232					5.98755	2.6627e-05
			5.99283	-0.00603384					5.99292	-0.00146413					13.3598	0.271233					5.99282	2.59844e-05
			5.9981	-0.0060388					5.99818	-0.00149863					13.3651	0.265797					5.99808	2.53419e-05
			6.00336	-0.00604377					6.00345	-0.00147829					13.3704	0.260572					6.00335	1.69092e-05
			6.00863	-0.00604504					6.00872	-0.00149135					13.3756	0.255172					6.00861	-4.46661e-05
			6.01389	-0.00607962					6.01398	-0.00150442					13.3809	0.249416					6.01388	-7.52264e-05
			6.01916	-0.00617248					6.01925	-0.00159149					13.3862	0.243726					6.01915	-6.13288e-05
			6.02443	-0.00626533					6.02451	-0.00174952					13.3914	0.239154					6.02441	-3.12529e-05
			6.02969	-0.00645905					6.02978	-0.00178276					13.3967	0.234337					6.02968	4.60528e-06
			6.03496	-0.00679206					6.03505	-0.00173648					13.4019	0.23007					6.03494	2.42485e-05
			6.04022	-0.00681084					6.04031	-0.00163089					13.4072	0.225674					6.04021	3.41105e-05
			6.04549	-0.0066421					6.04558	-0.00143932					13.4125	0.221455					6.04548	2.99314e-05
			6.05076	-0.00632024					6.05084	-0.00142334					13.4177	0.21679					6.05074	2.57523e-05
			6.05602	-0.006					6.05611	-0.0014227					13.423	0.212597					6.05601	1.83272e-05
			6.06129	-0.00602595					6.06138	-0.00144063					13.4283	0.208269					6.06127	2.66193e-05
			6.06655	-0.0060519					6.06664	-0.00145855					13.4335	0.204202					6.06654	1.36398e-05
			6.07182	-0.00611733					6.07191	-0.00147236					13.4388	0.200056					6.07181	6.60215e-07
			6.07708	-0.00621012					6.07717	-0.00150478					13.4441	0.196147					6.07707	-2.63763e-05
			6.08235	-0.00621618					6.08244	-0.0015372					13.4493	0.191827					6.08234	-7.22757e-05
			6.08762	-0.0062524					6.08771	-0.00160445					13.4546	0.187775					6.0876	-7.53814e-05
			6.09288	-0.00628862					6.09297	-0.00181152					13.4599	0.183867					6.09287	-5.53676e-05
			6.09815	-0.00642411					6.09824	-0.00190798					13.4651	0.180388					6.09813	-2.33609e-05
			6.10341	-0.00680499					6.1035	-0.00187572					13.4704	0.176878					6.1034	1.7084e-05
			6.10868	-0.00689874					6.10877	-0.0018049					13.4757	0.173287					6.10867	1.93271e-05
			6.11395	-0.00670617					6.11404	-0.00165525					13.4809	0.170057					6.11393	1.85055e-05
			6.11921	-0.00646384					6.1193	-0.00159577					13.4862	0.166452					6.1192	1.76838e-05
			6.12448	-0.00612594					6.12457	-0.00157946					13.4915	0.16303					6.12446	1.3789e-05
			6.12974	-0.00609682					6.12983	-0.00160573					13.4967	0.159601					6.12973	9.22358e-06
			6.13501	-0.00609789					6.1351	-0.00163201					13.502	0.156429					6.135	-6.29179e-07
			6.14028	-0.00609895					6.14037	-0.00167699					13.5073	0.153029					6.14026	-1.04819e-05
			6.14554	-0.00620967					6.14563	-0.00168412					13.5125	0.149774					6.14553	-3.11904e-05
			6.15081	-0.00622976					6.1509	-0.00169124					13.5178	0.146342					6.15079	-8.19366e-05
			6.15607	-0.00621411					6.15616	-0.00171125					13.5231	0.14311					6.15606	-0.000103709
			6.16134	-0.00625623					6.16143	-0.00194153					13.5283	0.140143					6.16133	-9.07169e-05
			6.16661	-0.00629835					6.1667	-0.00211238					13.5336	0.137138					6.16659	-5.915e-05
			6.17187	-0.00670373					6.17196	-0.00210612					13.5389	0.134294					6.17186	-1.03781e-05
			6.17714	-0.00686628					6.17723	-0.00200569					13.5441	0.131716					6.17712	-3.93777e-06
			6.1824	-0.00674936					6.1825	-0.0019091					13.5494	0.129252					6.18239	-1.7666e-06
			6.18767	-0.00654457					6.18776	-0.00177369					13.5547	0.126488					6.18766	-2.7984e-06
			6.19294	-0.00620321					6.19303	-0.00178026					13.5599	0.123858					6.19292	-3.83019e-06
			6.1982	-0.00607057					6.19829	-0.00178683					13.5652	0.121117					6.19819	-6.0205e-06
			6.20347	-0.00602103					6.20356	-0.00181128					13.5705	0.118703					6.20345	-6.9638e-06
			6.20873	-0.00600913					6.20883	-0.00183533					13.5757	0.116055					6.20872	-7.9071e-06
			6.214	-0.00600368					6.21409	-0.00187223					13.581	0.113523					6.21399	-1.80788e-05
			6.21927	-0.00599822					6.21936	-0.00190038					13.5863	0.110903					6.21925	-7.31435e-05
			6.22453	-0.00601075					6.22462	-0.00192853					13.5915	0.108463					6.22452	-9.50384e-05
			6.2298	-0.00602328					6.22989	-0.00200741					13.5968	0.105957					6.22978	-7.93691e-05
			6.23506	-0.00606354					6.23516	-0.00214493					13.6021	0.10381					6.23505	-5.88266e-05
			6.24033	-0.00651295					6.24042	-0.0018312					13.6073	0.10165					6.24032	-1.77497e-05
			6.2456	-0.00684061					6.24569	-0.00140683					13.6126	0.0994323					6.24558	9.27908e-07
			6.25086	-0.006872					6.25095	-0.00124849					13.6179	0.0973396					6.25085	8.41722e-06
			6.25613	-0.00675274					6.25622	-0.00125351					13.6231	0.0952833					6.25611	1.05438e-05
			6.26139	-0.00642894					6.26149	-0.00125853					13.6284	0.0931705					6.26138	8.43307e-06
			6.26666	-0.00624137					6.26675	-0.00148717					13.6337	0.0910508					6.26665	6.3223e-06
			6.27193	-0.00616118					6.27202	-0.00187161					13.6389	0.0890105					6.27191	5.71951e-06
			6.27719	-0.00615624					6.27728	-0.00191415					13.6442	0.0870113					6.27718	1.53911e-06
			6.28246	-0.00617819					6.28255	-0.00201491					13.6494	0.0853008					6.28244	-2.6413e-06
			6.28772	-0.00620014					6.28782	-0.00204807					13.6547	0.0834594					6.28771	-5.99264e-05
			6.29299	-0.006203					6.29308	-0.00208123					13.66	0.0815816					6.29298	-0.000100971
			6.29826	-0.00627602					6.29835	-0.00215094					13.6652	0.0796064					6.29824	-0.000104565
			6.30352	-0.00634904					6.30361	-0.00237803					13.6705	0.0779802					6.30351	-8.49788e-05
			6.30879	-0.0065171					6.30888	-0.00247507					13.6758	0.076485					6.30877	-5.08397e-05
			6.31405	-0.0069033					6.31415	-0.00246642					13.681	0.0748741					6.31404	-2.72597e-06
			6.31932	-0.00698131					6.31941	-0.00240097					13.6863	0.0733677					6.31931	-4.99026e-06
			6.32459	-0.00674515					6.32468	-0.00226931					13.6916	0.0719701					6.32457	-7.25454e-06
			6.32985	-0.00650586					6.32994	-0.00221039					13.6968	0.0705088					6.32984	-1.60036e-05
			6.33512	-0.00620117					6.33521	-0.00219511					13.7021	0.0689326					6.3351	-2.06987e-05
			6.34038	-0.00617118					6.34048	-0.00220666					13.7074	0.0675659					6.34037	-2.01092e-05
			6.34565	-0.00616457					6.34574	-0.0022182					13.7126	0.0661102					6.34564	-3.2477e-05
			6.35092	-0.0061955					6.35101	-0.00225586					13.7179	0.0648189					6.3509	-4.48448e-05
			6.35618	-0.00622644					6.35628	-0.00228769					13.7232	0.0634514					6.35617	-7.01483e-05
			6.36145	-0.00624879					6.36154	-0.00231331					13.7284	0.0620913					6.36143	-0.000117443
			6.36671	-0.00627347					6.36681	-0.00233893					13.7337	0.0605744					6.3667	-0.00012824
			6.37198	-0.00629814					6.37207	-0.00252303					13.739	0.0593172					6.37197	-0.000114489
			6.37725	-0.00643076					6.37734	-0.00265243					13.7442	0.0581071					6.37723	-8.93747e-05
			6.38251	-0.00686456					6.38261	-0.00269193					13.7495	0.0570002					6.3825	-4.30823e-05
			6.38778	-0.00702094					6.38787	-0.00262766					13.7548	0.0558979					6.38776	-4.05823e-05
			6.39304	-0.00699018					6.39314	-0.0024783					13.76	0.0549337					6.39303	-4.23594e-05
			6.39831	-0.00684707					6.3984	-0.00231009					13.7653	0.0538005					6.3983	-4.41364e-05
			6.40358	-0.00646131					6.40367	-0.00231836					13.7706	0.0526729					6.40356	-4.99173e-05
			6.40884	-0.00632902					6.40894	-0.00232664					13.7758	0.0515637					6.40883	-5.57353e-05
			6.41411	-0.00629311					6.4142	-0.00235492					13.7811	0.0505756					6.41409	-5.79921e-05
			6.41937	-0.00634864					6.41947	-0.00237288					13.7864	0.0496165					6.41936	-7.1635e-05
			6.42464	-0.00640417					6.42473	-0.00239706					13.7916	0.0486233					6.42463	-8.52778e-05
			6.42991	-0.00649297					6.43	-0.002437					13.7969	0.0475894					6.42989	-0.000140359
			6.43517	-0.00650303					6.43527	-0.00247694					13.8022	0.0465298					6.43516	-0.000166606
			6.44044	-0.00651308					6.44053	-0.0025722					13.8074	0.0455468					6.44042	-0.000149428
			6.4457	-0.00659185					6.4458	-0.00277554					13.8127	0.0446171					6.44569	-0.000128954
			6.45097	-0.0070638					6.45106	-0.00283533					13.818	0.0438399					6.45096	-9.76578e-05
			6.45624	-0.00742193					6.45633	-0.00279424					13.8232	0.0430284					6.45622	-7.77312e-05
			6.4615	-0.00738479					6.4616	-0.00270231					13.8285	0.0423043					6.46149	-7.26067e-05
			6.46677	-0.00717113					6.46686	-0.00258254					13.8338	0.0414962					6.46675	-7.52258e-05
			6.47203	-0.00693052					6.47213	-0.00257181					13.839	0.0407002					6.47202	-7.78449e-05
			6.4773	-0.00662811					6.47739	-0.00257569					13.8443	0.0399414					6.47729	-8.93065e-05
			6.48257	-0.00663042					6.48266	-0.00257956					13.8496	0.0391533					6.48255	-9.11458e-05
			6.48783	-0.00663273					6.48793	-0.0026181					13.8548	0.0383956					6.48782	-9.69007e-05
			6.4931	-0.00666453					6.49319	-0.00264698					13.8601	0.0377308					6.49308	-0.000102656
			6.49836	-0.00667804					6.49846	-0.00265545					13.8654	0.0370527					6.49835	-0.000163876
			6.50363	-0.00666479					6.50372	-0.00266392					13.8706	0.0362098					6.50361	-0.000204737
			6.5089	-0.00666494					6.50899	-0.00272005					13.8759	0.0354502					6.50888	-0.000198752
			6.51416	-0.00666509					6.51426	-0.0029151					13.8811	0.0347408					6.51415	-0.000169808
			6.51943	-0.00699904					6.51952	-0.00297771					13.8864	0.0341645					6.51941	-0.000135033
			6.52469	-0.0073124					6.52479	-0.00292333					13.8917	0.0335753					6.52468	-9.09642e-05
			6.52996	-0.00736991					6.53006	-0.00283343					13.8969	0.0330894					6.52994	-9.01772e-05
			6.53523	-0.0072926					6.53532	-0.00270312					13.9022	0.0325598					6.53521	-9.19526e-05
			6.54049	-0.00706254					6.54059	-0.0026448					13.9075	0.0319938					6.54048	-9.37279e-05
			6.54576	-0.00670161					6.54585	-0.00263345					13.9127	0.0313509					6.54574	-9.66598e-05
			6.55102	-0.0067282					6.55112	-0.00266653					13.918	0.0307888					6.55101	-9.8825e-05
			6.55629	-0.00675479					6.55639	-0.00269962					13.9233	0.0302202					6.55627	-0.000110447
			6.56156	-0.00684047					6.56165	-0.00271188					13.9285	0.0297334					6.56154	-0.000122069
			6.56682	-0.00697354					6.56692	-0.00269597					13.9338	0.0292243					6.56681	-0.00014592
			6.57209	-0.00705702					6.57218	-0.00269916					13.9391	0.0286586					6.57207	-0.000183738
			6.57735	-0.00707993					6.57745	-0.00270235					13.9443	0.0280282					6.57734	-0.000189178
			6.58262	-0.00710285					6.58272	-0.0029055					13.9496	0.0275182					6.5826	-0.000175282
			6.58789	-0.00722066					6.58798	-0.00303626					13.9549	0.0271083					6.58787	-0.000147294
			6.59315	-0.00775114					6.59325	-0.00300365					13.9601	0.026673					6.59314	-0.000100989
			6.59842	-0.00794277					6.59851	-0.00291513					13.9654	0.0263038					6.5984	-9.72215e-05
			6.60368	-0.00785565					6.60378	-0.0027753					13.9707	0.0259793					6.60367	-9.6806e-05
			6.60895	-0.00764413					6.60905	-0.00268056					13.9759	0.0255834					6.60893	-9.80113e-05
			6.61422	-0.00729					6.61431	-0.0026402					13.9812	0.025122					6.6142	-9.92166e-05
			6.61948	-0.00717115					6.61958	-0.00263653					13.9865	0.0247189					6.61947	-0.000101459
			6.62475	-0.00719771					6.62484	-0.00264715					13.9917	0.0243184					6.62473	-0.00010653
			6.63001	-0.00722427					6.63011	-0.00265776					13.997	0.0239463					6.63	-0.0001116
			6.63528	-0.00728174					6.63538	-0.00268072					14.0023	0.0235797					6.63526	-0.000124416
			6.64055	-0.00735296					6.64064	-0.00270506					14.0075	0.0232092					6.64053	-0.000171811
			6.64581	-0.00734461					6.64591	-0.00272941					14.0128	0.0227442					6.6458	-0.000201524
			6.65108	-0.00736607					6.65117	-0.00280256					14.0181	0.0222781					6.65106	-0.000195581
			6.65634	-0.00738754					6.65644	-0.00296028					14.0233	0.0219354					6.65633	-0.000165321
			6.66161	-0.00786993					6.66171	-0.00297346					14.0286	0.0216609					6.66159	-0.00011976
			6.66688	-0.00812901					6.66697	-0.00288139					14.0339	0.0214039					6.66686	-0.000111608
			6.67214	-0.00804441					6.67224	-0.00276274					14.0391	0.0211563					6.67213	-0.000108753
			6.67741	-0.00785338					6.6775	-0.00261464					14.0444	0.0209057					6.67739	-0.00011413
			6.68267	-0.00760682					6.68277	-0.00256644					14.0497	0.0205495					6.68266	-0.000119506
			6.68794	-0.0073111					6.68804	-0.00255366					14.0549	0.0202251					6.68792	-0.000127752
			6.69321	-0.00734067					6.6933	-0.00254845					14.0602	0.0199027					6.69319	-0.000127766
			6.69847	-0.00737024					6.69857	-0.00254701					14.0655	0.0196231					6.69846	-0.00012778
			6.70374	-0.00744543					6.70383	-0.00254557					14.0707	0.019376					6.70372	-0.000129429
			6.709	-0.00750749					6.7091	-0.00254738					14.076	0.0191123					6.70899	-0.000182413
			6.71427	-0.00745391					6.71437	-0.00254919					14.0813	0.0187267					6.71425	-0.000213707
			6.71954	-0.0075529					6.71963	-0.00260134					14.0865	0.0183645					6.71952	-0.000205212
			6.7248	-0.00765188					6.7249	-0.00279447					14.0918	0.0180804					6.72479	-0.000175746
			6.73007	-0.00785587					6.73017	-0.00286491					14.0971	0.0178786					6.73005	-0.000142268
			6.73533	-0.00810369					6.73543	-0.00281071					14.1023	0.0176842					6.73532	-9.83719e-05
			6.7406	-0.00810507					6.7407	-0.00270708					14.1076	0.0175488					6.74058	-9.41813e-05
			6.74587	-0.00801445					6.74596	-0.00255242					14.1129	0.0173767					6.74585	-9.25243e-05
			6.75113	-0.00781738					6.75123	-0.0024873					14.1181	0.017128					6.75112	-9.08674e-05
			6.7564	-0.00739797					6.7565	-0.00246615					14.1234	0.0168708					6.75638	-8.71323e-05
			6.76166	-0.00734816					6.76176	-0.00248437					14.1286	0.0166226					6.76165	-8.18854e-05
			6.76693	-0.00733381					6.76703	-0.00250258					14.1339	0.0164009					6.76691	-9.08724e-05
			6.7722	-0.0073485					6.77229	-0.00251794					14.1392	0.0162234					6.77218	-9.98593e-05
			6.77746	-0.00736318					6.77756	-0.00250488					14.1444	0.0160473					6.77745	-0.000122624
			6.78273	-0.00740661					6.78283	-0.00250851					14.1497	0.0157644					6.78271	-0.000159941
			6.78799	-0.00743558					6.78809	-0.00251213					14.155	0.0154663					6.78798	-0.000165907
			6.79326	-0.00746455					6.79336	-0.00272907					14.1602	0.0152206					6.79324	-0.000150311
			6.79853	-0.00757733					6.79862	-0.00286531					14.1655	0.015066					6.79851	-0.000108776
			6.80379	-0.00798244					6.80389	-0.00282459					14.1708	0.0149326					6.80378	-5.52711e-05
			6.80906	-0.00809062					6.80916	-0.0027155					14.176	0.0148392					6.80904	-4.96376e-05
			6.81432	-0.00794092					6.81442	-0.00259882					14.1813	0.014749					6.81431	-4.8749e-05
			6.81959	-0.00767659					6.81969	-0.00243912					14.1866	0.0145852					6.81957	-5.46429e-05
			6.82485	-0.00731988					6.82495	-0.00244369					14.1918	0.0143814					6.82484	-6.05369e-05
			6.83012	-0.0071961					6.83022	-0.00244825					14.1971	0.014217					6.83011	-6.0841e-05
			6.83539	-0.00719036					6.83549	-0.00245938					14.2024	0.0140687					6.83537	-6.30599e-05
			6.84065	-0.00718462					6.84075	-0.00245034					14.2076	0.0139132					6.84064	-6.52788e-05
			6.84592	-0.00716634					6.84602	-0.00244742					14.2129	0.013777					6.8459	-8.20254e-05
			6.85118	-0.00716334					6.85128	-0.00249022					14.2182	0.0135845					6.85117	-0.000132925
			6.85645	-0.00718278					6.85655	-0.00253302					14.2234	0.0133463					6.85644	-0.000153581
			6.86172	-0.00720222					6.86182	-0.00261899					14.2287	0.0131341					6.8617	-0.000140835
			6.86698	-0.00727318					6.86708	-0.0028012					14.234	0.0130053					6.86697	-0.000111719
			6.87225	-0.00772715					6.87235	-0.0028298					14.2392	0.0129016					6.87223	-6.28915e-05
			6.87751	-0.00799962					6.87761	-0.00276625					14.2445	0.0128362					6.8775	-4.55113e-05
			6.88278	-0.00804282					6.88288	-0.00262163					14.2498	0.0127822					6.88277	-4.25105e-05
			6.88805	-0.00786601					6.88815	-0.00239386					14.255	0.0126843					6.88803	-4.22853e-05
			6.89331	-0.00754038					6.89341	-0.00236061					14.2603	0.0125243					6.8933	-4.20601e-05
			6.89858	-0.00740005					6.89868	-0.00234997					14.2656	0.0123911					6.89856	-4.22862e-05
			6.90384	-0.00735771					6.90395	-0.00235176					14.2708	0.0122657					6.90383	-3.83973e-05
			6.90911	-0.00741602					6.90921	-0.00235356					14.2761	0.0121478					6.9091	-4.99542e-05
			6.91438	-0.00747432					6.91448	-0.00235924					14.2814	0.0120508					6.91436	-6.15112e-05
			6.91964	-0.00754085					6.91974	-0.00236454					14.2866	0.0119368					6.91963	-8.53334e-05
			6.92491	-0.0075728					6.92501	-0.00236984					14.2919	0.011739					6.92489	-0.000118101
			6.93017	-0.00763855					6.93028	-0.00242138					14.2972	0.0115219					6.93016	-0.000115157
			6.93544	-0.00770429					6.93554	-0.00262385					14.3024	0.0113972					6.93542	-8.56457e-05
			6.94071	-0.00818355					6.94081	-0.00268811					14.3077	0.0113324					6.94069	-4.23432e-05
			6.94597	-0.00859758					6.94607	-0.00262998					14.313	0.0112894					6.94596	1.08875e-05
			6.95124	-0.00866957					6.95134	-0.00252261					14.3182	0.0112539					6.95122	1.0769e-05
			6.9565	-0.00849832					6.95661	-0.0023895					14.3235	0.0111989					6.95649	1.06505e-05
			6.96177	-0.00822502					6.96187	-0.0023529					14.3288	0.011088					6.96175	3.65305e-06
			6.96704	-0.00785912					6.96714	-0.00235209					14.334	0.0109747					6.96702	-5.15561e-06
			6.9723	-0.0078321					6.9724	-0.00237985					14.3393	0.0108603					6.97229	-4.25901e-06
			6.97757	-0.00783198					6.97767	-0.00240761					14.3446	0.0107564					6.97755	-8.2415e-06
			6.98283	-0.00783185					6.98294	-0.00244683					14.3498	0.0106825					6.98282	-1.2224e-05
			6.9881	-0.00785801					6.9882	-0.00243524					14.3551	0.0105957					6.98808	-3.06356e-05
			6.99337	-0.00784731					6.99347	-0.00243027					14.3604	0.0104355					6.99335	-7.66378e-05
			6.99863	-0.00784988					6.99873	-0.00253974					14.3656	0.0102443					6.99862	-7.162e-05
			7.0039	-0.00785245					7.004	-0.0026492					14.3709	0.0101061					7.00388	-4.13697e-05
			7.00916	-0.00796426					7.00927	-0.00275523					14.3761	0.0100331					7.00915	-1.28377e-05
			7.01443	-0.00831451					7.01453	-0.0027262					14.3814	0.00999531					7.01441	3.80623e-05
			7.0197	-0.00842486					7.0198	-0.00263471					14.3867	0.0099891					7.01968	4.39347e-05
			7.02496	-0.00835701					7.02506	-0.00249067					14.3919	0.00995652					7.02495	4.58452e-05
			7.03023	-0.00819396					7.03033	-0.00230866					14.3972	0.00992395					7.03021	4.31247e-05
			7.03549	-0.00780403					7.0356	-0.00230421					14.4025	0.00979289					7.03548	4.04041e-05
			7.04076	-0.00771702					7.04086	-0.00231119					14.4077	0.00969648					7.04074	3.32375e-05
			7.04603	-0.0076772					7.04613	-0.00231817					14.413	0.00961977					7.04601	2.90625e-05
			7.05129	-0.00769029					7.05139	-0.00234688					14.4183	0.00955099					7.05128	2.48876e-05
			7.05656	-0.00770338					7.05666	-0.00232883					14.4235	0.00949379					7.05654	7.78719e-06
			7.06182	-0.00768785					7.06193	-0.00236148					14.4288	0.00935881					7.06181	-3.77405e-05
			7.06709	-0.00766673					7.06719	-0.00239413					14.4341	0.00918482					7.06707	-4.86986e-05
			7.07236	-0.00767627					7.07246	-0.00247444					14.4393	0.00905653					7.07234	-3.68315e-05
			7.07762	-0.0076858					7.07773	-0.00261923					14.4446	0.00900132					7.07761	-1.46251e-05
			7.08289	-0.00816457					7.08299	-0.00261031					14.4499	0.00898532					7.08287	2.85418e-05
			7.08815	-0.00837977					7.08826	-0.00253279					14.4551	0.0089807					7.08814	3.49694e-05
			7.09342	-0.00825416					7.09352	-0.00241658					14.4604	0.00897607					7.0934	3.70898e-05
			7.09869	-0.00799253					7.09879	-0.00223426					14.4657	0.00896471					7.09867	3.69413e-05
			7.10395	-0.00767064					7.10406	-0.00224522					14.4709	0.00885643					7.10394	3.67928e-05
			7.10922	-0.00726649					7.10932	-0.00225618					14.4762	0.00877129					7.1092	3.5814e-05
			7.11448	-0.00726208					7.11459	-0.00228551					14.4815	0.00871366					7.11447	3.17141e-05
			7.11975	-0.00726783					7.11985	-0.00230393					14.4867	0.00863987					7.11973	2.76143e-05
			7.12502	-0.00727358					7.12512	-0.00230064					14.492	0.00859881					7.125	1.9108e-05
			7.13028	-0.00735524					7.13039	-0.00230041					14.4973	0.00853292					7.13027	-4.55414e-05
			7.13555	-0.00738524					7.13565	-0.00237417					14.5025	0.00838128					7.13553	-7.48353e-05
			7.14081	-0.00747573					7.14092	-0.00244794					14.5078	0.00821577					7.1408	-6.52206e-05
			7.14608	-0.00756622					7.14618	-0.00264668					14.5131	0.00813428					7.14606	-3.87318e-05
			7.15135	-0.00778209					7.15145	-0.00271576					14.5183	0.00811379					7.15133	5.01393e-06
			7.15661	-0.00823286					7.15672	-0.00263849					14.5236	0.00811219					7.1566	4.91506e-05
			7.16188	-0.00824332					7.16198	-0.00250432					14.5289	0.00811043					7.16186	4.71221e-05
			7.16714	-0.00806733					7.16725	-0.00233034					14.5341	0.00810866					7.16713	4.50936e-05
			7.17241	-0.0078959					7.17251	-0.00231637					14.5394	0.00807508					7.17239	3.88655e-05
			7.17768	-0.00776735					7.17778	-0.00231395					14.5447	0.00798097					7.17766	3.21235e-05
			7.18294	-0.00771014					7.18305	-0.00232787					14.5499	0.00789866					7.18293	3.59073e-05
			7.18821	-0.00773749					7.18831	-0.00234179					14.5552	0.00781991					7.18819	2.75801e-05
			7.19347	-0.00776484					7.19358	-0.00235688					14.5605	0.00779023					7.19346	1.92528e-05
			7.19874	-0.00783555					7.19884	-0.00237398					14.5657	0.00775596					7.19872	-2.84456e-06
			7.20401	-0.00787288					7.20411	-0.00239109					14.571	0.00763613					7.20399	-4.6398e-05
			7.20927	-0.00793168					7.20938	-0.00243543					14.5763	0.00746866					7.20926	-4.01365e-05
			7.21454	-0.00799049					7.21464	-0.00263667					14.5815	0.00739491					7.21452	-1.16348e-05
			7.2198	-0.00817748					7.21991	-0.00272654					14.5868	0.00738122					7.21979	2.11977e-05
			7.22507	-0.00858039					7.22517	-0.00268493					14.5921	0.00737001					7.22505	7.25398e-05
			7.23034	-0.00867385					7.23044	-0.00260693					14.5973	0.0073779					7.23032	7.79373e-05
			7.2356	-0.00852673					7.23571	-0.00247872					14.6026	0.00737553					7.23559	8.00134e-05
			7.24087	-0.0082689					7.24097	-0.00239491					14.6078	0.00737315					7.24085	7.29891e-05
			7.24613	-0.00785182					7.24624	-0.00235555					14.6131	0.00729499					7.24612	6.59648e-05
			7.2514	-0.00769236					7.25151	-0.00235559					14.6184	0.00723362					7.25138	6.10951e-05
			7.25667	-0.00764812					7.25677	-0.00236123					14.6236	0.00717497					7.25665	5.06383e-05
			7.26193	-0.00765632					7.26204	-0.00236688					14.6289	0.00714506					7.26192	4.01815e-05
			7.2672	-0.00766453					7.2673	-0.00236373					14.6342	0.00710993					7.26718	1.84054e-05
			7.27246	-0.00760793					7.27257	-0.00236357					14.6394	0.00700443					7.27245	-3.39117e-05
			7.27773	-0.00757913					7.27784	-0.00248094					14.6447	0.00684809					7.27771	-5.36917e-05
			7.283	-0.0075819					7.2831	-0.00259831					14.65	0.00674413					7.28298	-4.76056e-05
			7.28826	-0.00758466					7.28837	-0.00275978					14.6552	0.00670771					7.28825	-2.36268e-05
			7.29353	-0.0079633					7.29363	-0.0027294					14.6605	0.00670323					7.29351	2.94993e-05
			7.29879	-0.00815198					7.2989	-0.00263025					14.6658	0.00671114					7.29878	3.93558e-05
			7.30406	-0.00795778					7.30417	-0.00253223					14.671	0.00669888					7.30404	4.43413e-05
			7.30933	-0.0077089					7.30943	-0.00237589					14.6763	0.00668662					7.30931	4.3918e-05
			7.31459	-0.00739781					7.3147	-0.00236612					14.6816	0.00665285					7.31458	4.34948e-05
			7.31986	-0.00721224					7.31996	-0.00236644					14.6868	0.00658151					7.31984	4.15186e-05
			7.32512	-0.00712325					7.32523	-0.00237959					14.6921	0.00652801					7.32511	3.86463e-05
			7.33039	-0.0070825					7.3305	-0.00239274					14.6974	0.00648722					7.33037	3.5774e-05
			7.33566	-0.00706273					7.33576	-0.00238818					14.7026	0.00645674					7.33564	2.63903e-05
			7.34092	-0.00707658					7.34103	-0.0024244					14.7079	0.00639529					7.3409	-2.45282e-05
			7.34619	-0.00709043					7.34629	-0.00246062					14.7132	0.00626904					7.34617	-4.46961e-05
			7.35145	-0.007178					7.35156	-0.00254294					14.7184	0.00616046					7.35144	-3.85839e-05
			7.35672	-0.00726557					7.35683	-0.00273625					14.7237	0.00610438					7.3567	-9.18404e-06
			7.36199	-0.00746216					7.36209	-0.00278556					14.729	0.0061002					7.36197	3.58081e-05
			7.36725	-0.00782182					7.36736	-0.00275867					14.7342	0.00611994					7.36723	5.40384e-05
			7.37252	-0.00785784					7.37262	-0.00265721					14.7395	0.00613173					7.3725	6.12346e-05
			7.37778	-0.00769453					7.37789	-0.00246846					14.7448	0.00612409					7.37777	6.44102e-05
			7.38305	-0.00741166					7.38316	-0.00244127					14.75	0.00611644					7.38303	6.75859e-05
			7.38832	-0.00695843					7.38842	-0.00243409					14.7553	0.00602918					7.3883	6.89085e-05
			7.39358	-0.00684195					7.39369	-0.00245163					14.7606	0.00598503					7.39356	7.15968e-05
			7.39885	-0.00685846					7.39895	-0.00246917					14.7658	0.00595915					7.39883	6.48422e-05
			7.40411	-0.00687497					7.40422	-0.00248881					14.7711	0.00595794					7.4041	5.80876e-05
			7.40938	-0.00691827					7.40949	-0.00250045					14.7764	0.00592775					7.40936	3.695e-05
			7.41465	-0.00695841					7.41475	-0.0025121					14.7816	0.0058203					7.41463	-1.58173e-06
			7.41991	-0.00700707					7.42002	-0.00255632					14.7869	0.00569276					7.41989	-4.79711e-06
			7.42518	-0.00705573					7.42529	-0.00273228					14.7922	0.00561749					7.42516	1.75223e-05
			7.43044	-0.00722831					7.43055	-0.00284598					14.7974	0.00560937					7.43043	4.85616e-05
			7.43571	-0.00763756					7.43582	-0.00280101					14.8027	0.00562172					7.43569	9.28246e-05
			7.44098	-0.00767119					7.44108	-0.00271114					14.808	0.00564828					7.44096	9.45046e-05
			7.44624	-0.00749297					7.44635	-0.00257334					14.8132	0.00563735					7.44622	9.23104e-05
			7.45151	-0.00721813					7.45162	-0.00249184					14.8185	0.00562641					7.45149	9.01163e-05
			7.45677	-0.00686335					7.45688	-0.00245799					14.8238	0.00560351					7.45676	7.17319e-05
			7.46204	-0.00672779					7.46215	-0.00246954					14.829	0.00556041					7.46202	6.03748e-05
			7.46731	-0.00669586					7.46741	-0.00248108					14.8343	0.00551357					7.46729	4.90555e-05
			7.47257	-0.00670479					7.47268	-0.00249973					14.8396	0.00547852					7.47255	3.77362e-05
			7.47784	-0.00671371					7.47795	-0.00250809					14.8448	0.00546152					7.47782	1.19455e-05
			7.4831	-0.00668047					7.48321	-0.00251783					14.8501	0.00538714					7.48309	-3.885e-05
			7.48837	-0.0066577					7.48848	-0.00252758					14.8553	0.00524701					7.48835	-4.85455e-05
			7.49364	-0.00668022					7.49374	-0.00271762					14.8606	0.00513829					7.49362	-2.94082e-05
			7.4989	-0.00670275					7.49901	-0.0028641					14.8659	0.00511931					7.49888	-7.28181e-06
			7.50417	-0.00713556					7.50428	-0.00288355					14.8711	0.00513366					7.50415	3.30268e-05
			7.50943	-0.00733799					7.50954	-0.00281073					14.8764	0.00516799					7.50942	3.90101e-05
			7.5147	-0.00728041					7.51481	-0.00271022					14.8817	0.00516625					7.51468	3.93314e-05
			7.51997	-0.00712851					7.52007	-0.00253329					14.8869	0.00516452					7.51995	3.40733e-05
			7.52523	-0.00675509					7.52534	-0.00253657					14.8922	0.00513952					7.52521	2.88153e-05
			7.5305	-0.00654688					7.53061	-0.00253985					14.8975	0.00507902					7.53048	2.82955e-05
			7.53576	-0.0064576					7.53587	-0.00257351					14.9027	0.00504661					7.53575	2.17329e-05
			7.54103	-0.00644908					7.54114	-0.0026342					14.908	0.00502466					7.54101	1.51703e-05
			7.5463	-0.00644056					7.5464	-0.00263462					14.9133	0.00501362					7.54628	-6.98132e-07
			7.55156	-0.00642258					7.55167	-0.0026299					14.9185	0.00496062					7.55154	-4.99721e-05
			7.55683	-0.00640746					7.55694	-0.00267351					14.9238	0.00481875					7.55681	-6.85481e-05
			7.56209	-0.00641236					7.5622	-0.00271713					14.9291	0.00470859					7.56208	-6.25723e-05
			7.56736	-0.00641725					7.56747	-0.0028714					14.9343	0.00468073					7.56734	-3.9205e-05
			7.57262	-0.00681966					7.57273	-0.00289551					14.9396	0.00468543					7.57261	2.74356e-06
			7.57789	-0.00713193					7.578	-0.00281134					14.9449	0.00469764					7.57787	2.50286e-05
			7.58316	-0.00715754					7.58327	-0.00270386					14.9501	0.00471337					7.58314	3.49511e-05
			7.58842	-0.006985					7.58853	-0.00253654					14.9554	0.00471073					7.58841	3.6916e-05
			7.59369	-0.00669363					7.5938	-0.0025066					14.9607	0.00470809					7.59367	3.88809e-05
			7.59895	-0.00634209					7.59907	-0.00249465					14.9659	0.00464612					7.59894	4.07372e-05
			7.60422	-0.00636177					7.60433	-0.00250809					14.9712	0.00460938					7.6042	4.13718e-05
			7.60949	-0.00638146					7.6096	-0.00252154					14.9765	0.00458296					7.60947	4.13956e-05
			7.61475	-0.00644626					7.61486	-0.00250906					14.9817	0.00457698					7.61474	4.14194e-05
			7.62002	-0.00655868					7.62013	-0.00253184					14.987	0.00454984					7.62	-7.03267e-06
			7.62528	-0.00662873					7.6254	-0.00255461					14.9923	0.00443495					7.62527	-5.60343e-05
			7.63055	-0.00671803					7.63066	-0.00261411					14.9975	0.00430858					7.63053	-5.6717e-05
			7.63582	-0.00680734					7.63593	-0.00279194					15.0028	0.00423651					7.6358	-2.40376e-05
			7.64108	-0.00700554					7.64119	-0.00285081					15.0081	0.00422225					7.64107	1.38799e-05
			7.64635	-0.00743355					7.64646	-0.00281432					15.0133	0.00424101					7.64633	6.46204e-05
			7.65161	-0.00751264					7.65173	-0.00275578					15.0186	0.00426242					7.6516	6.42692e-05
			7.65688	-0.00732811					7.65699	-0.0026312					15.0239	0.00426797					7.65686	6.3918e-05
			7.66215	-0.00707334					7.66226	-0.0026081					15.0291	0.00423293					7.66213	5.91898e-05
			7.66741	-0.0067705					7.66752	-0.00260582					15.0344	0.00419788					7.6674	5.38845e-05
			7.67268	-0.00662288					7.67279	-0.00262196					15.0397	0.00413839					7.67266	5.56982e-05
			7.67794	-0.00661575					7.67806	-0.00263811					15.0449	0.00409885					7.67793	4.79637e-05
			7.68321	-0.00661374					7.68332	-0.00263022					15.0502	0.00408649					7.68319	4.02293e-05
			7.68848	-0.00661172					7.68859	-0.00259227					15.0555	0.00407877					7.68846	2.00995e-05
			7.69374	-0.00657706					7.69385	-0.00263814					15.0607	0.00399868					7.69373	-3.7233e-05
			7.69901	-0.00653125					7.69912	-0.002684					15.066	0.00386832					7.69899	-4.612e-05
			7.70427	-0.00653475					7.70439	-0.00277624					15.0713	0.00377865					7.70426	-2.08261e-05
			7.70954	-0.00653825					7.70965	-0.00292054					15.0765	0.00375916					7.70952	3.25116e-06
			7.71481	-0.00697042					7.71492	-0.00289128					15.0818	0.00378536					7.71479	5.17929e-05
			7.72007	-0.0071306					7.72018	-0.00277281					15.087	0.00383714					7.72006	5.76098e-05
			7.72534	-0.00698667					7.72545	-0.00262739					15.0923	0.00384201					7.72532	5.86779e-05
			7.7306	-0.00675069					7.73072	-0.00242083					15.0976	0.00383808					7.73059	5.63703e-05
			7.73587	-0.00648079					7.73598	-0.00237395					15.1028	0.00383415					7.73585	5.40627e-05
			7.74114	-0.00633688					7.74125	-0.00237601					15.1081	0.00378601					7.74112	5.94773e-05
			7.7464	-0.00629714					7.74651	-0.00237806					15.1134	0.00375042					7.74638	6.08673e-05
			7.75167	-0.00631165					7.75178	-0.00238597					15.1186	0.00372248					7.75165	5.63453e-05
			7.75693	-0.00632617					7.75705	-0.00239124					15.1239	0.00371617					7.75692	5.18232e-05
			7.7622	-0.00633397					7.76231	-0.00239066					15.1292	0.00365948					7.76218	9.9001e-07
			7.76747	-0.00631741					7.76758	-0.00242218					15.1344	0.00353621					7.76745	-1.92775e-05
			7.77273	-0.00631323					7.77284	-0.00245369					15.1397	0.00342831					7.77271	2.11665e-07
			7.778	-0.0064933					7.77811	-0.00261181					15.145	0.00339665					7.77798	3.28854e-05
			7.78326	-0.00667338					7.78338	-0.00262842					15.1502	0.00341319					7.78325	9.35865e-05
			7.78853	-0.00691691					7.78864	-0.00254762					15.1555	0.00344414					7.78851	0.000125327
			7.7938	-0.00679916					7.79391	-0.00241979					15.1608	0.00345811					7.79378	0.000140937
			7.79906	-0.00658832					7.79918	-0.00222191					15.166	0.00345331					7.79904	0.000156548
			7.80433	-0.00632734					7.80444	-0.00216239					15.1713	0.00344852					7.80431	0.000159871
			7.80959	-0.005917					7.80971	-0.00215014					15.1766	0.00339283					7.80958	0.000170203
			7.81486	-0.00593093					7.81497	-0.00213789					15.1818	0.00334699					7.81484	0.000184944
			7.82013	-0.00594486					7.82024	-0.00213207					15.1871	0.00330766					7.82011	0.000192877
			7.82539	-0.00598892					7.82551	-0.00210824					15.1924	0.00329272					7.82537	0.000191397
			7.83066	-0.00597316					7.83077	-0.00210337					15.1976	0.00327778					7.83064	0.000189917
			7.83592	-0.00592705					7.83604	-0.00212894					15.2029	0.0031556					7.83591	0.000170959
			7.84119	-0.00594757					7.8413	-0.0021545					15.2082	0.00302568					7.84117	0.000187555
			7.84646	-0.00596809					7.84657	-0.00231931					15.2134	0.002983					7.84644	0.000233209
			7.85172	-0.00610459					7.85184	-0.00238599					15.2187	0.00298095					7.8517	0.00029646
			7.85699	-0.00639761					7.8571	-0.00234242					15.224	0.00299596					7.85697	0.000367061
			7.86225	-0.00646651					7.86237	-0.00221874					15.2292	0.00305529					7.86224	0.000417504
			7.86752	-0.00632436					7.86763	-0.00201729					15.2345	0.00303792					7.8675	0.000432363
			7.87279	-0.0060313					7.8729	-0.00183535					15.2398	0.00302054					7.87277	0.000447522
			7.87805	-0.00559284					7.87817	-0.00184301					15.245	0.00298514					7.87803	0.000472094
			7.88332	-0.00544137					7.88343	-0.00185067					15.2503	0.00294597					7.8833	0.000510079
			7.88858	-0.0054299					7.8887	-0.00186528					15.2556	0.00292412					7.88857	0.000552549
			7.89385	-0.00542733					7.89396	-0.0018318					15.2608	0.00290983					7.89383	0.000569332
			7.89912	-0.00542818					7.89923	-0.00182466					15.2661	0.00288976					7.8991	0.000572781
			7.90438	-0.00542903					7.9045	-0.0018613					15.2714	0.00279912					7.90436	0.000576229
			7.90965	-0.00541758					7.90976	-0.00189793					15.2766	0.00267841					7.90963	0.000610981
			7.91491	-0.00545545					7.91503	-0.00197557					15.2819	0.00260371					7.9149	0.000687169
			7.92018	-0.00549331					7.92029	-0.00211319					15.2872	0.00257422					7.92016	0.000764285
			7.92545	-0.0058962					7.92556	-0.00209379					15.2924	0.0025854					7.92543	0.00085906
			7.93071	-0.00607045					7.93083	-0.00198234					15.2977	0.00262581					7.93069	0.000941797
			7.93598	-0.00595538					7.93609	-0.00180975					15.303	0.00261708					7.93596	0.000992376
			7.94124	-0.00574276					7.94136	-0.00158315					15.3082	0.00260835					7.94123	0.00102261
			7.94651	-0.00541275					7.94662	-0.00156629					15.3135	0.00257974					7.94649	0.00105916
			7.95178	-0.00535016					7.95189	-0.00156609					15.3188	0.0025373					7.95176	0.00111153
			7.95704	-0.00532912					7.95716	-0.0015659					15.324	0.00250259					7.95702	0.00118605
			7.96231	-0.00534636					7.96242	-0.00153195					15.3293	0.00247309					7.96229	0.00125197
			7.96757	-0.0053636					7.96769	-0.00150352					15.3345	0.00245799					7.96756	0.00127415
			7.97284	-0.00541644					7.97296	-0.0014945					15.3398	0.00239701					7.97282	0.00129079
			7.97811	-0.00538665					7.97822	-0.00151314					15.3451	0.00226234					7.97809	0.0013405
			7.98337	-0.00537319					7.98349	-0.00153178					15.3503	0.00214979					7.98335	0.00142222
			7.98864	-0.00559593					7.98875	-0.0016617					15.3556	0.00210283					7.98862	0.00151499
			7.9939	-0.00581867					7.99402	-0.00167208					15.3609	0.00211407					7.99389	0.00163441
			7.99917	-0.00602389					7.99929	-0.00156291					15.3661	0.00215121					7.99915	0.0017434
			8.00444	-0.0059312					8.00455	-0.0013909					15.3714	0.00216831					8.00442	0.00182302
			8.0097	-0.00574699					8.00982	-0.00117041					15.3767	0.00216942					8.00968	0.0018853
			8.01497	-0.00540935					8.01508	-0.00100052					15.3819	0.00213944					8.01495	0.0019562
			8.02023	-0.00491433					8.02035	-0.000986258					15.3872	0.00210946					8.02022	0.00203009
			8.0255	-0.00488974					8.02562	-0.000971993					15.3925	0.0020678					8.02548	0.00210855
			8.03077	-0.00487976					8.03088	-0.000949206					15.3977	0.00202998					8.03075	0.00221041
			8.03603	-0.00486977					8.03615	-0.000911696					15.403	0.00202361					8.03601	0.00228059
			8.0413	-0.00483621					8.04141	-0.000794838					15.4083	0.00198823					8.04128	0.00232155
			8.04656	-0.00472184					8.04668	-0.000814237					15.4135	0.00187556					8.04655	0.00238106
			8.05183	-0.00475784					8.05195	-0.000833637					15.4188	0.0017597					8.05181	0.00248505
			8.0571	-0.00479384					8.05721	-0.000892722					15.4241	0.00172155					8.05708	0.00259604
			8.06236	-0.0049263					8.06248	-0.00090167					15.4293	0.00173085					8.06234	0.00272962
			8.06763	-0.0052591					8.06774	-0.000791564					15.4346	0.00174903					8.06761	0.00286368
			8.07289	-0.00522772					8.07301	-0.00061931					15.4399	0.00176986					8.07288	0.00298473
			8.07816	-0.00494428					8.07828	-0.000386514					15.4451	0.0017799					8.07814	0.00306143
			8.08343	-0.00464646					8.08354	-0.000186963					15.4504	0.00175203					8.08341	0.00315391
			8.08869	-0.00424146					8.08881	-0.000167799					15.4557	0.00172417					8.08867	0.00324778
			8.09396	-0.00410246					8.09407	-0.000148634					15.4609	0.00167877					8.09394	0.00334286
			8.09922	-0.00408049					8.09934	-0.000123722					15.4662	0.00166134					8.09921	0.00345821
			8.10449	-0.00405852					8.10461	-5.46147e-05					15.4715	0.00166004					8.10447	0.00356814
			8.10976	-0.00405531					8.10987	4.33256e-06					15.4767	0.00164272					8.10974	0.00363241
			8.11502	-0.00402615					8.11514	-3.28799e-06					15.482	0.00154928					8.115	0.00369087
			8.12029	-0.00403808					8.1204	-1.09085e-05					15.4873	0.00141192					8.12027	0.00379047
			8.12555	-0.00405001					8.12567	-7.21115e-05					15.4925	0.00134172					8.12554	0.00392639
			8.13082	-0.00415402					8.13094	-0.000138854					15.4978	0.00132911					8.1308	0.00406956
			8.13609	-0.00451267					8.1362	-6.63923e-05					15.5031	0.00133235					8.13607	0.00422268
			8.14135	-0.00456563					8.14147	6.72198e-05					15.5083	0.00136617					8.14133	0.00438027
			8.14662	-0.00439873					8.14674	0.000267345					15.5136	0.00136609					8.1466	0.0044893
			8.15188	-0.00410723					8.152	0.000458433					15.5189	0.00136602					8.15186	0.00459075
			8.15715	-0.00369913					8.15727	0.000501431					15.5241	0.0013431					8.15713	0.00469218
			8.16242	-0.00337251					8.16253	0.000544428					15.5294	0.00129446					8.1624	0.00480354
			8.16768	-0.00333471					8.1678	0.000553223					15.5347	0.00125873					8.16766	0.00493241
			8.17295	-0.00329691					8.17307	0.000594597					15.5399	0.00123302					8.17293	0.00505898
			8.17821	-0.00325207					8.17833	0.000659869					15.5452	0.001228					8.17819	0.00515346
			8.18348	-0.00322831					8.1836	0.000693748					15.5505	0.00118245					8.18346	0.00523246
			8.18875	-0.0031104					8.18886	0.000691087					15.5557	0.00106586					8.18873	0.0053423
			8.19401	-0.0031908					8.19413	0.000688426					15.561	0.000984023					8.19399	0.0054774
			8.19928	-0.00327119					8.1994	0.00060927					15.5663	0.000961014					8.19926	0.00563493
			8.20454	-0.00344803					8.20466	0.000626275					15.5715	0.000975146					8.20452	0.0058
			8.20981	-0.00361569					8.20993	0.000757068					15.5768	0.00103524					8.20979	0.0059734
			8.21508	-0.00344176					8.21519	0.000968797					15.582	0.00104357					8.21506	0.00610117
			8.22034	-0.00316362					8.22046	0.00119699					15.5873	0.00104044					8.22032	0.00622127
			8.22561	-0.00282914					8.22573	0.00128056					15.5926	0.0010373					8.22559	0.00634304
			8.23087	-0.00240312					8.23099	0.00132069					15.5978	0.000985876					8.23085	0.00648726
			8.23614	-0.00226928					8.23626	0.00136082					15.6031	0.000955564					8.23612	0.00661574
			8.24141	-0.00225543					8.24152	0.00141758					15.6084	0.000934169					8.24139	0.00675523
			8.24667	-0.00224157					8.24679	0.00144904					15.6136	0.000927819					8.24665	0.00686035
			8.25194	-0.00223117					8.25206	0.00150675					15.6189	0.000898052					8.25192	0.00695364
			8.2572	-0.00213774					8.25732	0.00148848					15.6242	0.000781876					8.25718	0.00705994
			8.26247	-0.00218118					8.26259	0.00147022					15.6294	0.000669306					8.26245	0.00719731
			8.26774	-0.00222462					8.26785	0.0014127					15.6347	0.000616889					8.26772	0.00735509
			8.273	-0.0023756					8.27312	0.00137012					15.64	0.000618519					8.27298	0.00754412
			8.27827	-0.00264787					8.27839	0.0014819					15.6452	0.000654613					8.27825	0.00772378
			8.28353	-0.00258028					8.28365	0.00168697					15.6505	0.000706542					8.28351	0.00787394
			8.2888	-0.00238141					8.28892	0.00187872					15.6558	0.00069513					8.28878	0.00801461
			8.29406	-0.00212598					8.29418	0.00205443					15.661	0.000683719					8.29405	0.00814767
			8.29933	-0.00170607					8.29945	0.00212409					15.6663	0.000659042					8.29931	0.00827438
			8.3046	-0.00157031					8.30472	0.0021481					15.6716	0.000621541					8.30458	0.00841325
			8.30986	-0.00155036					8.30998	0.0021959					15.6768	0.000594504					8.30984	0.00857509
			8.31513	-0.00153041					8.31525	0.00223459					15.6821	0.00058344					8.31511	0.00870402
			8.32039	-0.00149673					8.32052	0.00229119					15.6874	0.000564134					8.32038	0.00881588
			8.32566	-0.00144615					8.32578	0.00229564					15.6926	0.00046943					8.32564	0.00892183
			8.33093	-0.00143315					8.33105	0.00228015					15.6979	0.000353472					8.33091	0.00906041
			8.33619	-0.00146025					8.33631	0.00226466					15.7032	0.000304484					8.33617	0.00922076
			8.34146	-0.00148734					8.34158	0.00220323					15.7084	0.000301399					8.34144	0.00939792
			8.34672	-0.00184058					8.34685	0.00226808					15.7137	0.00032202					8.34671	0.00959905
			8.35199	-0.00198088					8.35211	0.0024357					15.719	0.000389452					8.35197	0.00978118
			8.35726	-0.00182882					8.35738	0.00265267					15.7242	0.000389844					8.35724	0.00992704
			8.36252	-0.00147826					8.36264	0.00292193					15.7295	0.000379433					8.3625	0.0100627
			8.36779	-0.000971414					8.36791	0.0030637					15.7348	0.000369023					8.36777	0.0102181
			8.37305	-0.000820725					8.37318	0.00308008					15.74	0.000320855					8.37304	0.0103607
			8.37832	-0.000772242					8.37844	0.00309008					15.7453	0.000300111					8.3783	0.0105364
			8.38359	-0.000764662					8.38371	0.00313355					15.7506	0.000295427					8.38357	0.0106961
			8.38885	-0.000757081					8.38897	0.00320025					15.7558	0.000286649					8.38883	0.0108261
			8.39412	-0.000727327					8.39424	0.003229					15.7611	0.000217056					8.3941	0.010938
			8.39938	-0.000614446					8.39951	0.00321746					15.7664	0.000102547					8.39937	0.011092
			8.40465	-0.000717341					8.40477	0.00320591					15.7716	1.7894e-05					8.40463	0.0112679
			8.40992	-0.000820236					8.41004	0.00312954					15.7769	5.42137e-06					8.4099	0.0114723
			8.41518	-0.0010315					8.4153	0.00319415					15.7822	2.24328e-05					8.41516	0.0116759
			8.42045	-0.00119486					8.42057	0.00331194					15.7874	7.12393e-05					8.42043	0.011896
			8.42571	-0.00106399					8.42584	0.003452					15.7927	9.40858e-05					8.4257	0.0120739
			8.43098	-0.000810672					8.4311	0.00370513					15.798	9.24499e-05					8.43096	0.012239
			8.43625	-0.000419726					8.43637	0.00378661					15.8032	9.08139e-05					8.43623	0.0123959
			8.44151	3.36498e-06					8.44163	0.0038208					15.8085	5.02782e-05					8.44149	0.0125753
			8.44678	7.29646e-05					8.4469	0.00385499					15.8137	3.53616e-05					8.44676	0.0127609
			8.45204	8.50633e-05					8.45217	0.00389624					15.819	3.15605e-05					8.45203	0.0129419
			8.45731	8.95162e-05					8.45743	0.00394248					15.8243	2.7362e-05					8.45729	0.0131155
			8.46258	9.3969e-05					8.4627	0.00402985					15.8295	-2.78384e-06					8.46256	0.0132714
			8.46784	0.000178084					8.46796	0.00399957					15.8348	-0.000112175					8.46782	0.0134301
			8.47311	0.0002139					8.47323	0.00396928					15.8401	-0.000231398					8.47309	0.0136195
			8.47837	0.000148838					8.4785	0.00390957					15.8453	-0.000279532					8.47836	0.0138598
			8.48364	8.37769e-05					8.48376	0.00388867					15.8506	-0.000265286					8.48362	0.0140947
			8.48891	-0.000166546					8.48903	0.00400777					15.8559	-0.000211898					8.48889	0.0143453
			8.49417	-7.15594e-05					8.4943	0.0041873					15.8611	-0.000134869					8.49415	0.0145607
			8.49944	0.0001452					8.49956	0.00441474					15.8664	-0.000143731					8.49942	0.0147666
			8.5047	0.000428843					8.50483	0.00461535					15.8717	-0.000152593					8.50469	0.0149585
			8.50997	0.000844401					8.51009	0.00465132					15.8769	-0.000176088					8.50995	0.0151629
			8.51524	0.00100013					8.51536	0.00468729					15.8822	-0.000214945					8.51522	0.015391
			8.5205	0.00102968					8.52063	0.00472807					15.8875	-0.00024422					8.52048	0.015625
			8.52577	0.00105923					8.52589	0.00478901					15.8927	-0.000250015					8.52575	0.0158353
			8.53103	0.00107495					8.53116	0.00488426					15.898	-0.000257981					8.53102	0.0160187
			8.5363	0.00110776					8.53642	0.0049194					15.9033	-0.000348626					8.53628	0.0162216
			8.54157	0.00114892					8.54169	0.0049056					15.9085	-0.000467849					8.54155	0.0164353
			8.54683	0.0011229					8.54696	0.0048918					15.9138	-0.000530616					8.54681	0.0167094
			8.5521	0.00109688					8.55222	0.00484394					15.9191	-0.00052613					8.55208	0.0169763
			8.55736	0.000749323					8.55749	0.00495185					15.9243	-0.000488223					8.55734	0.0172685
			8.56263	0.000727473					8.56275	0.0051552					15.9296	-0.000427174					8.56261	0.0175325
			8.5679	0.00091668					8.56802	0.00537757					15.9349	-0.00041839					8.56788	0.0177962
			8.57316	0.00122525					8.57329	0.00563194					15.9401	-0.000417602					8.57314	0.0180335
			8.57843	0.00171104					8.57855	0.00577635					15.9454	-0.000432269					8.57841	0.0182909
			8.58369	0.00191272					8.58382	0.00582541					15.9507	-0.000446936					8.58367	0.0185426
			8.58896	0.00200605					8.58908	0.00588613					15.9559	-0.000453865					8.58894	0.0188257
			8.59423	0.00204919					8.59435	0.0059716					15.9612	-0.000457279					8.59421	0.0190999
			8.59949	0.00209234					8.59962	0.0060793					15.9665	-0.000460694					8.59947	0.0193617
			8.60476	0.0021462					8.60488	0.00621544					15.9717	-0.000476173					8.60474	0.0196004
			8.61002	0.00232404					8.61015	0.00620906					15.977	-0.000586993					8.61	0.0198833
			8.61529	0.00228101					8.61541	0.00620269					15.9823	-0.000653721					8.61527	0.0201809
			8.62056	0.00223798					8.62068	0.00619077					15.9875	-0.0006408					8.62054	0.020504
			8.62582	0.00212833					8.62595	0.00627989					15.9928	-0.000614827					8.6258	0.0208639
			8.63109	0.002014					8.63121	0.00646636					15.9981	-0.000569445					8.63107	0.0212219
			8.63635	0.00211469					8.63648	0.00668669					16.0033	-0.000529137					8.63633	0.0215402
			8.64162	0.00243217					8.64174	0.00699386					16.0086	-0.000511224					8.6416	0.0218456
			8.64689	0.00288218					8.64701	0.00721044					16.0139	-0.000532096					8.64687	0.0221724
			8.65215	0.0033455					8.65228	0.00728415					16.0191	-0.000552969					8.65213	0.0224995
			8.65742	0.00341056					8.65754	0.00733585					16.0244	-0.000581836					8.6574	0.022864
			8.66268	0.00347562					8.66281	0.00744892					16.0297	-0.000579465					8.66266	0.0232163
			8.66795	0.00350777					8.66807	0.00757385					16.0349	-0.000580758					8.66793	0.0235787
			8.67322	0.00360283					8.67334	0.00771921					16.0402	-0.000582051					8.6732	0.0239141
			8.67848	0.00376998					8.67861	0.00772355					16.0455	-0.000679164					8.67846	0.024252
			8.68375	0.00385241					8.68387	0.00771947					16.0507	-0.000768362					8.68373	0.0246612
			8.68901	0.00383436					8.68914	0.00771538					16.056	-0.000786304					8.68899	0.0250964
			8.69428	0.00381631					8.69441	0.00779393					16.0612	-0.000767466					8.69426	0.0255198
			8.69955	0.003633					8.69967	0.00796139					16.0665	-0.000718798					8.69953	0.025953
			8.70481	0.00381038					8.70494	0.00813195					16.0718	-0.000677717					8.70479	0.0264078
			8.71008	0.00413392					8.7102	0.00841002					16.077	-0.000657819					8.71006	0.0268268
			8.71534	0.00451769					8.71547	0.00869645					16.0823	-0.000669499					8.71532	0.0272788
			8.72061	0.00503323					8.72074	0.00880355					16.0876	-0.000681179					8.72059	0.0277
			8.72588	0.00538373					8.726	0.00884401					16.0928	-0.000697858					8.72586	0.0281703
			8.73114	0.00550062					8.73127	0.00894678					16.0981	-0.000709961					8.73112	0.0286311
			8.73641	0.00557089					8.73653	0.00904996					16.1034	-0.000713669					8.73639	0.0291194
			8.74167	0.00566153					8.7418	0.00919377					16.1086	-0.000717377					8.74165	0.0295844
			8.74694	0.00576511					8.74707	0.00927603					16.1139	-0.000798583					8.74692	0.0300693
			8.75221	0.00588999					8.75233	0.00931546					16.1192	-0.000902754					8.75219	0.0305483
			8.75747	0.00593489					8.7576	0.0093549					16.1244	-0.000950031					8.75745	0.0310993
			8.76274	0.00586241					8.76286	0.0094046					16.1297	-0.000929839					8.76272	0.0316532
			8.768	0.00578993					8.76813	0.00955303					16.135	-0.000885012					8.76798	0.0322496
			8.77327	0.00591654					8.7734	0.00978452					16.1402	-0.000827576					8.77325	0.0328159
			8.77854	0.00624496					8.77866	0.0100887					16.1455	-0.000824501					8.77852	0.0334075
			8.7838	0.00661346					8.78393	0.0103649					16.1508	-0.000828571					8.78378	0.0339605
			8.78907	0.00705191					8.78919	0.0105236					16.156	-0.00083264					8.78905	0.0345326
			8.79433	0.00750889					8.79446	0.0105974					16.1613	-0.000853209					8.79431	0.0351608
			8.7996	0.00757309					8.79973	0.0107475					16.1666	-0.000863415					8.79958	0.0357566
			8.80487	0.00763728					8.80499	0.0108928					16.1718	-0.000862011					8.80485	0.0364144
			8.81013	0.00775551					8.81026	0.0110435					16.1771	-0.000864751					8.81011	0.0370447
			8.8154	0.00793135					8.81552	0.0112327					16.1824	-0.000867491					8.81538	0.0377037
			8.82066	0.00815808					8.82079	0.0112816					16.1876	-0.000988553					8.82064	0.0383446
			8.82593	0.00813307					8.82606	0.0113306					16.1929	-0.00105428					8.82591	0.0390653
			8.8312	0.00810805					8.83132	0.0113445					16.1982	-0.0010347					8.83118	0.0397858
			8.83646	0.00802311					8.83659	0.0115091					16.2034	-0.000984459					8.83644	0.040554
			8.84173	0.00800791					8.84185	0.0117689					16.2087	-0.000918683					8.84171	0.0412971
			8.84699	0.00814711					8.84712	0.0121003					16.214	-0.000843709					8.84697	0.0420319
			8.85226	0.00855341					8.85239	0.0124943					16.2192	-0.000850876					8.85224	0.0428375
			8.85753	0.00913949					8.85765	0.0128002					16.2245	-0.000858042					8.85751	0.0436299
			8.86279	0.00971712					8.86292	0.0129755					16.2298	-0.000875675					8.86277	0.0443942
			8.86806	0.00997334					8.86819	0.0131124					16.235	-0.000889328					8.86804	0.0451799
			8.87332	0.0100111					8.87345	0.013261					16.2403	-0.000889486					8.8733	0.0460611
			8.87859	0.0101337					8.87872	0.0134787					16.2456	-0.000905963					8.87857	0.04688
			8.88386	0.0103278					8.88398	0.0137304					16.2508	-0.000922439					8.88384	0.0477845
			8.88912	0.010545					8.88925	0.0139354					16.2561	-0.000962871					8.8891	0.0486149
			8.89439	0.0106844					8.89452	0.0139765					16.2614	-0.00104106					8.89437	0.0495269
			8.89965	0.010745					8.89978	0.0140457					16.2666	-0.00105389					8.89963	0.0504824
			8.90492	0.0107637					8.90505	0.0142396					16.2719	-0.0010142					8.9049	0.0515944
			8.91019	0.0107825					8.91031	0.0145351					16.2772	-0.000946819					8.91017	0.0526146
			8.91545	0.0110731					8.91558	0.0148626					16.2824	-0.000860358					8.91543	0.0535592
			8.92072	0.0115805					8.92085	0.0152542					16.2877	-0.000859034					8.9207	0.0546263
			8.92598	0.0121637					8.92611	0.0156568					16.293	-0.000863367					8.92596	0.0557903
			8.93125	0.0127844					8.93138	0.0158811					16.2982	-0.0008677					8.93123	0.0568735
			8.93652	0.0131776					8.93664	0.0160297					16.3035	-0.000866363					8.9365	0.0578727
			8.94178	0.0133605					8.94191	0.0162433					16.3087	-0.000865027					8.94176	0.0589822
			8.94705	0.0135345					8.94718	0.0165244					16.314	-0.000874239					8.94703	0.0600281
			8.95231	0.0137588					8.95244	0.0167995					16.3193	-0.00088345					8.95229	0.0611751
			8.95758	0.0139493					8.95771	0.017082					16.3245	-0.000927124					8.95756	0.0622621
			8.96285	0.0142678					8.96297	0.0172193					16.3298	-0.00100462					8.96283	0.0634527
			8.96811	0.0143347					8.96824	0.0173032					16.3351	-0.0010365					8.96809	0.0646783
			8.97338	0.0143684					8.97351	0.0174831					16.3403	-0.00102764					8.97336	0.0660022
			8.97864	0.0144021					8.97877	0.0177658					16.3456	-0.00097676					8.97862	0.0671761
			8.98391	0.0145239					8.98404	0.0180699					16.3509	-0.000881444					8.98389	0.0684304
			8.98918	0.0149467					8.9893	0.0185289					16.3561	-0.000841541					8.98915	0.0696392
			8.99444	0.0153822					8.99457	0.0189891					16.3614	-0.000836177					8.99442	0.070826
			8.99971	0.0159639					8.99984	0.0192979					16.3667	-0.000830813					8.99969	0.0721162
			9.00497	0.0165473					9.0051	0.0194836					16.3719	-0.000829344					9.00495	0.0734205
			9.01024	0.0168101					9.01037	0.0197168					16.3772	-0.000820766					9.01022	0.0746802
			9.01551	0.0168892					9.01563	0.0200038					16.3825	-0.000816326					9.01548	0.0759488
			9.02077	0.0170275					9.0209	0.0202856					16.3877	-0.000820473					9.02075	0.0773662
			9.02604	0.0172628					9.02617	0.020594					16.393	-0.00082462					9.02602	0.0786622
			9.0313	0.0176475					9.03143	0.0208206					16.3983	-0.000921632					9.03128	0.0800551
			9.03657	0.017712					9.0367	0.020942					16.4035	-0.000968156					9.03655	0.0813653
			9.04183	0.0177368					9.04197	0.0210725					16.4088	-0.000947139					9.04181	0.0828348
			9.0471	0.0177616					9.04723	0.0213374					16.4141	-0.000905064					9.04708	0.0842255
			9.05237	0.0178223					9.0525	0.0216885					16.4193	-0.000830364					9.05235	0.0858366
			9.05763	0.0182199					9.05776	0.0221439					16.4246	-0.000786659					9.05761	0.0873204
			9.0629	0.0187137					9.06303	0.0226147					16.4299	-0.000769031					9.06288	0.088822
			9.06816	0.0193137					9.0683	0.0229853					16.4351	-0.000767408					9.06814	0.0902246
			9.07343	0.0199321					9.07356	0.0232067					16.4404	-0.000765785					9.07341	0.0917415
			9.0787	0.0202531					9.07883	0.0234493					16.4457	-0.000763029					9.07868	0.0931638
			9.08396	0.0203561					9.08409	0.0237105					16.4509	-0.000756786					9.08394	0.0945971
			9.08923	0.0205655					9.08936	0.0239629					16.4562	-0.000770796					9.08921	0.0962029
			9.09449	0.0208622					9.09463	0.0243034					16.4615	-0.000784806					9.09447	0.0978026
			9.09976	0.0212119					9.09989	0.0245711					16.4667	-0.00081909					9.09974	0.0992737
			9.10503	0.0214944					9.10516	0.0246972					16.472	-0.000876388					9.10501	0.100721
			9.11029	0.0215358					9.11042	0.0247814					16.4773	-0.000883853					9.11027	0.102344
			9.11556	0.0215771					9.11569	0.0250211					16.4825	-0.000835558					9.11554	0.10384
			9.12082	0.0216001					9.12096	0.0253741					16.4878	-0.000760962					9.1208	0.105438
			9.12609	0.021862					9.12622	0.0257517					16.4931	-0.000667084					9.12607	0.10699
			9.13136	0.0223145					9.13149	0.026155					16.4983	-0.000642418					9.13134	0.108656
			9.13662	0.0228828					9.13675	0.0265621					16.5036	-0.000635449					9.1366	0.110155
			9.14189	0.0234673					9.14202	0.0268096					16.5089	-0.000628479					9.14187	0.111753
			9.14715	0.0239035					9.14729	0.0270108					16.5141	-0.000628361					9.14713	0.113287
			9.15242	0.0240268					9.15255	0.0272362					16.5194	-0.000610075					9.1524	0.114916
			9.15769	0.0242233					9.15782	0.0275122					16.5247	-0.000591541					9.15767	0.116487
			9.16295	0.0244883					9.16308	0.027798					16.5299	-0.000592609					9.16293	0.118049
			9.16822	0.0247056					9.16835	0.0280766					16.5352	-0.000593678					9.1682	0.119717
			9.17348	0.0250122					9.17362	0.0282279					16.5404	-0.000654503					9.17346	0.121318
			9.17875	0.0250079					9.17888	0.0282684					16.5457	-0.000644348					9.17873	0.122864
			9.18402	0.0250037					9.18415	0.0284433					16.551	-0.000580074					9.184	0.124407
			9.18928	0.0249441					9.18941	0.0287531					16.5562	-0.000506991					9.18926	0.126059
			9.19455	0.0250759					9.19468	0.0290694					16.5615	-0.000407975					9.19453	0.127575
			9.19981	0.0253897					9.19995	0.0294646					16.5668	-0.000304438					9.19979	0.129238
			9.20508	0.0258699					9.20521	0.029889					16.572	-0.000300652					9.20506	0.130736
			9.21035	0.0264967					9.21048	0.0301491					16.5773	-0.000296867					9.21033	0.132331
			9.21561	0.0269083					9.21575	0.0303168					16.5826	-0.000291897					9.21559	0.13381
			9.22088	0.0269734					9.22101	0.0304913					16.5878	-0.000259345					9.22086	0.135413
			9.22614	0.027007					9.22628	0.0307079					16.5931	-0.00022071					9.22612	0.136885
			9.23141	0.0271079					9.23154	0.0309247					16.5984	-0.000237533					9.23139	0.13848
			9.23668	0.027209					9.23681	0.0311633					16.6036	-0.000254357					9.23666	0.140304
			9.24194	0.027434					9.24208	0.0313128					16.6089	-0.000289197					9.24192	0.14225
			9.24721	0.0274193					9.24734	0.0313329					16.6142	-0.000309943					9.24719	0.143708
			9.25247	0.0274045					9.25261	0.0314278					16.6194	-0.000280196					9.25245	0.14512
			9.25774	0.0273067					9.25787	0.0315995					16.6247	-0.000220683					9.25772	0.146637
			9.26301	0.0272798					9.26314	0.0318611					16.63	-0.000127446					9.26299	0.14811
			9.26827	0.0275468					9.26841	0.0321965					16.6352	-2.4298e-05					9.26825	0.149492
			9.27354	0.0279276					9.27367	0.0325832					16.6405	-1.25298e-05					9.27352	0.150822
			9.2788	0.0283146					9.27894	0.0328076					16.6458	-7.61638e-07					9.27878	0.152222
			9.28407	0.0287416					9.2842	0.0329141					16.651	1.21041e-05					9.28405	0.153485
			9.28934	0.028828					9.28947	0.0330268					16.6563	2.7184e-05					9.28932	0.154837
			9.2946	0.0288624					9.29474	0.0331635					16.6616	4.24514e-05					9.29458	0.1561
			9.29987	0.0288967					9.3	0.0332664					16.6668	4.82628e-05					9.29985	0.15744
			9.30513	0.0289589					9.30527	0.0334471					16.6721	3.70548e-05					9.30511	0.158649
			9.3104	0.0291089					9.31053	0.0334516					16.6774	2.58469e-05					9.31038	0.159882
			9.31567	0.029021					9.3158	0.0334403					16.6826	-1.46426e-05					9.31565	0.161019
			9.32093	0.0289331					9.32107	0.0334289					16.6879	5.34124e-06					9.32091	0.162218
			9.3262	0.0287308					9.32633	0.0334482					16.6932	6.92289e-05					9.32618	0.163335
			9.33146	0.0284968					9.3316	0.0336168					16.6984	0.000161981					9.33144	0.164389
			9.33673	0.0285505					9.33686	0.0338647					16.7037	0.000271791					9.33671	0.16551
			9.342	0.0287047					9.34213	0.0341143					16.709	0.000300946					9.34198	0.166583
			9.34726	0.029028					9.3474	0.034278					16.7142	0.000313991					9.34724	0.167636
			9.35253	0.0294095					9.35266	0.0343225					16.7195	0.000327037					9.35251	0.168659
			9.35779	0.0294064					9.35793	0.0343264					16.7248	0.000329148					9.35777	0.169661
			9.36306	0.0294033					9.36319	0.0343453					16.73	0.000339925					9.36304	0.170526
			9.36833	0.029342					9.36846	0.0343536					16.7353	0.000364908					9.36831	0.171432
			9.37359	0.0293006					9.37373	0.0343631					16.7406	0.000369133					9.37357	0.172228
			9.37886	0.0292887					9.37899	0.0343488					16.7458	0.000344874					9.37884	0.173034
			9.38412	0.0292537					9.38426	0.0343345					16.7511	0.000320614					9.3841	0.173744
			9.38939	0.0292186					9.38953	0.0340963					16.7564	0.00033965					9.38937	0.174509
			9.39466	0.0287467					9.39479	0.0340175					16.7616	0.000419049					9.39463	0.175185
			9.39992	0.02837					9.40006	0.0340679					16.7669	0.00050743					9.3999	0.175865
			9.40519	0.0282683					9.40532	0.0341437					16.7722	0.000606789					9.40517	0.176466
			9.41045	0.0283757					9.41059	0.0342917					16.7774	0.000700653					9.41043	0.177057
			9.41572	0.028631					9.41586	0.0343031					16.7827	0.000716506					9.4157	0.177551
			9.42099	0.0287624					9.42112	0.0342932					16.7879	0.000732359					9.42096	0.178001
			9.42625	0.0288157					9.42639	0.0342833					16.7932	0.000736206					9.42623	0.178467
			9.43152	0.0287452					9.43165	0.0341717					16.7985	0.000752348					9.4315	0.178899
			9.43678	0.0286748					9.43692	0.0340776					16.8037	0.000768556					9.43676	0.179258
			9.44205	0.0285465					9.44219	0.0340466					16.809	0.00077288					9.44203	0.179547
			9.44732	0.0283504					9.44745	0.0340352					16.8143	0.000735747					9.44729	0.179809
			9.45258	0.0282428					9.45272	0.0338657					16.8195	0.000698615					9.45256	0.180034
			9.45785	0.0281918					9.45798	0.033574					16.8248	0.000681528					9.45783	0.180264
			9.46311	0.0278212					9.46325	0.0333658					16.8301	0.000723514					9.46309	0.18045
			9.46838	0.0272052					9.46852	0.0332874					16.8353	0.000784578					9.46836	0.18062
			9.47365	0.0268121					9.47378	0.0332504					16.8406	0.000897331					9.47362	0.180732
			9.47891	0.0267994					9.47905	0.0332806					16.8459	0.00102137					9.47889	0.18073
			9.48418	0.026853					9.48431	0.0332321					16.8511	0.00103164					9.48416	0.180728
			9.48944	0.0269188					9.48958	0.0331837					16.8564	0.0010419					9.48942	0.180709
			9.49471	0.0269443					9.49485	0.0330818					16.8617	0.00104315					9.49469	0.180637
			9.49998	0.0267846					9.50011	0.0328288					16.8669	0.00106561					9.49995	0.180545
			9.50524	0.0266248					9.50538	0.0326259					16.8722	0.00108669					9.50522	0.180394
			9.51051	0.0262768					9.51064	0.0324647					16.8775	0.00107551					9.51049	0.180155
			9.51577	0.0259221					9.51591	0.0323671					16.8827	0.00106432					9.51575	0.179878
			9.52104	0.0257606					9.52118	0.0321741					16.888	0.00102949					9.52102	0.179598
			9.52631	0.0256047					9.52644	0.0317972					16.8933	0.000979754					9.52628	0.179288
			9.53157	0.0251536					9.53171	0.0314333					16.8985	0.00100358					9.53155	0.178989
			9.53684	0.0244326					9.53697	0.0312309					16.9038	0.00106222					9.53682	0.178639
			9.5421	0.0238865					9.54224	0.0310749					16.9091	0.00114118					9.54208	0.178274
			9.54737	0.0237631					9.54751	0.0309986					16.9143	0.00124468					9.54735	0.177799
			9.55264	0.0237389					9.55277	0.0309878					16.9196	0.00126716					9.55261	0.177313
			9.5579	0.0237849					9.55804	0.0308597					16.9249	0.00127419					9.55788	0.176757
			9.56317	0.0237293					9.56331	0.0305549					16.9301	0.00128122					9.56315	0.176215
			9.56843	0.0236737					9.56857	0.0302652					16.9354	0.00129526					9.56841	0.17561
			9.5737	0.0235133					9.57384	0.030024					16.9407	0.0013169					9.57368	0.175016
			9.57897	0.0231004					9.5791	0.0297496					16.9459	0.00133455					9.57894	0.174293
			9.58423	0.0227518					9.58437	0.0295414					16.9512	0.00133609					9.58421	0.173534
			9.5895	0.0225328					9.58964	0.0293023					16.9565	0.00130471					9.58948	0.172781
			9.59476	0.0223831					9.5949	0.0289164					16.9617	0.00127333					9.59474	0.172024
			9.60003	0.0220222					9.60017	0.0284192					16.967	0.00127206					9.60001	0.171259
			9.6053	0.0212836					9.60543	0.0281057					16.9723	0.00133606					9.60527	0.170507
			9.61056	0.02068					9.6107	0.0279079					16.9775	0.0014142					9.61054	0.169758
			9.61583	0.0204231					9.61597	0.0277536					16.9828	0.00150287					9.61581	0.168865
			9.62109	0.0202956					9.62123	0.0276354					16.9881	0.00158883					9.62107	0.167881
			9.62636	0.0202474					9.6265	0.0275018					16.9933	0.00159203					9.62634	0.166786
			9.63163	0.0201451					9.63176	0.0272196					16.9986	0.00159326					9.6316	0.165824
			9.63689	0.0200429					9.63703	0.0269105					17.0039	0.00159449					9.63687	0.164819
			9.64216	0.0198359					9.6423	0.0266061					17.0091	0.0016163					9.64214	0.163892
			9.64742	0.0195411					9.64756	0.0263114					17.0144	0.00167212					9.6474	0.162816
			9.65269	0.0192553					9.65283	0.0260397					17.0196	0.00166007					9.65267	0.161685
			9.65796	0.0189813					9.65809	0.0258401					17.0249	0.00164803					9.65793	0.160507
			9.66322	0.0187319					9.66336	0.0254968					17.0302	0.00161501					9.6632	0.159462
			9.66849	0.0184619					9.66863	0.0249794					17.0354	0.00159762					9.66847	0.158443
			9.67375	0.0178586					9.67389	0.0245795					17.0407	0.00165569					9.67373	0.157311
			9.67902	0.0171564					9.67916	0.0243325					17.046	0.00173409					9.679	0.156207
			9.68429	0.0166557					9.68442	0.0241613					17.0512	0.00182623					9.68426	0.15513
			9.68955	0.0164914					9.68969	0.0240573					17.0565	0.00192966					9.68953	0.153976
			9.69482	0.0164833					9.69496	0.0240045					17.0618	0.00194584					9.6948	0.152687
			9.70008	0.0164276					9.70022	0.0238103					17.067	0.00196202					9.70006	0.151531
			9.70535	0.016372					9.70549	0.0234495					17.0723	0.00196776					9.70533	0.150268
			9.71062	0.016223					9.71075	0.0230945					17.0776	0.0019842					9.71059	0.149103
			9.71588	0.0157476					9.71602	0.0228208					17.0828	0.00202101					9.71586	0.147805
			9.72115	0.0153762					9.72129	0.0225553					17.0881	0.00200396					9.72113	0.146511
			9.72641	0.0150387					9.72655	0.0223385					17.0934	0.00198691					9.72639	0.145067
			9.73168	0.0147609					9.73182	0.0220084					17.0986	0.00194536					9.73166	0.143816
			9.73695	0.0145293					9.73708	0.0215138					17.1039	0.00190986					9.73692	0.142206
			9.74221	0.0139878					9.74235	0.0210943					17.1092	0.00194206					9.74219	0.140604
			9.74748	0.0132196					9.74762	0.0208066					17.1144	0.00199146					9.74746	0.139236
			9.75274	0.0126236					9.75288	0.0206182					17.1197	0.00206949					9.75272	0.138028
			9.75801	0.0124163					9.75815	0.020445					17.125	0.00216203					9.75799	0.13675
			9.76328	0.0123304					9.76342	0.0203447					17.1302	0.00217607					9.76325	0.135317
			9.76854	0.0123115					9.76868	0.0201856					17.1355	0.00217945					9.76852	0.133955
			9.77381	0.0122926					9.77395	0.019879					17.1408	0.00218283					9.77379	0.13267
			9.77907	0.0122322					9.77921	0.0195396					17.146	0.00219435					9.77905	0.131388
			9.78434	0.0118679					9.78448	0.0193013					17.1513	0.00221628					9.78432	0.13001
			9.7896	0.0114941					9.78975	0.019052					17.1566	0.00221867					9.78958	0.128678
			9.79487	0.0111676					9.79501	0.0188374					17.1618	0.00220314					9.79485	0.127166
			9.80014	0.0109466					9.80028	0.0185563					17.1671	0.00218761					9.80011	0.125795
			9.8054	0.0108033					9.80554	0.0181489					17.1724	0.00211742					9.80538	0.12443
			9.81067	0.0104377					9.81081	0.0176961					17.1776	0.00210219					9.81065	0.123185
			9.81593	0.00975726					9.81608	0.0173704					17.1829	0.00214744					9.81591	0.12186
			9.8212	0.00908016					9.82134	0.0171322					17.1882	0.00222118					9.82118	0.120629
			9.82647	0.00874348					9.82661	0.0170079					17.1934	0.00231411					9.82644	0.119275
			9.83173	0.00860411					9.83187	0.016964					17.1987	0.00233379					9.83171	0.117917
			9.837	0.00864881					9.83714	0.0168762					17.204	0.00233465					9.83698	0.116612
			9.84226	0.0086584					9.84241	0.0166338					17.2092	0.00233551					9.84224	0.11522
			9.84753	0.00860356					9.84767	0.0162849					17.2145	0.00234723					9.84751	0.113862
			9.8528	0.00854873					9.85294	0.0160272					17.2198	0.00235551					9.85277	0.1126
			9.85806	0.00813551					9.8582	0.0157674					17.225	0.00235708					9.85804	0.111309
			9.86333	0.00780543					9.86347	0.0155566					17.2303	0.00234933					9.86331	0.109804
			9.86859	0.00757486					9.86874	0.0153671					17.2356	0.00234159					9.86857	0.108465
			9.87386	0.00743357					9.874	0.0150414					17.2408	0.00225201					9.87384	0.107114
			9.87913	0.00722881					9.87927	0.0145607					17.2461	0.00221377					9.8791	0.105902
			9.88439	0.00660321					9.88453	0.0142279					17.2514	0.0022558					9.88437	0.104588
			9.88966	0.00591411					9.8898	0.0140647					17.2566	0.00232269					9.88964	0.103436
			9.89492	0.00567064					9.89507	0.0139499					17.2619	0.002393					9.8949	0.10216
			9.90019	0.00562485					9.90033	0.013847					17.2671	0.00241516					9.90017	0.100904
			9.90546	0.00554896					9.9056	0.0137665					17.2724	0.0024198					9.90543	0.0995555
			9.91072	0.0055848					9.91086	0.0136062					17.2777	0.00241511					9.9107	0.0983258
			9.91599	0.00556154					9.91613	0.0133079					17.2829	0.00241042					9.91597	0.0970622
			9.92125	0.00553828					9.9214	0.0130401					17.2882	0.00240281					9.92123	0.0958983
			9.92652	0.00514332					9.92666	0.0128139					17.2935	0.00240086					9.9265	0.0947244
			9.93179	0.00487394					9.93193	0.0126448					17.2987	0.0023989					9.93176	0.0933472
			9.93705	0.00466623					9.9372	0.0124996					17.304	0.00238845					9.93703	0.0919887
			9.94232	0.00450396					9.94246	0.0122511					17.3093	0.00228173					9.9423	0.0908141
			9.94758	0.00437987					9.94773	0.0118372					17.3145	0.00221168					9.94756	0.0897167
			9.95285	0.00398328					9.95299	0.0115378					17.3198	0.00221694					9.95283	0.0885298
			9.95812	0.00332585					9.95826	0.0113599					17.3251	0.00225604					9.95809	0.087478
			9.96338	0.00288732					9.96353	0.0112579					17.3303	0.0023294					9.96336	0.0863072
			9.96865	0.00276957					9.96879	0.0111856					17.3356	0.00242485					9.96863	0.0850513
			9.97391	0.00278012					9.97406	0.0111602					17.3409	0.00241837					9.97389	0.0837497
			9.97918	0.00293134					9.97932	0.0111349					17.3461	0.00241189					9.97916	0.0826732
			9.98445	0.00292715					9.98459	0.0109148					17.3514	0.00239545					9.98442	0.0815356
			9.98971	0.00292296					9.98986	0.0106574					17.3567	0.00236991					9.98969	0.0804794
			9.99498	0.00282675					9.99512	0.0104446					17.3619	0.00238033					9.99496	0.0793868
			10.0002	0.00250345					10.0004	0.0102916					17.3672	0.00235802					10.0002	0.0782787
			10.0055	0.00224974					10.0057	0.0102052					17.3725	0.0023357					10.0055	0.0771465
			10.0108	0.00215597					10.0109	0.0100248					17.3777	0.0022851					10.0108	0.0760047
			10.016	0.00199406					10.0162	0.00969516					17.383	0.00221144					10.016	0.0749741
			10.0213	0.00183214					10.0215	0.00938126					17.3883	0.00219848					10.0213	0.0740021
			10.0266	0.00127238					10.0267	0.00918413					17.3935	0.00222286					10.0266	0.0730751
			10.0318	0.000847105					10.032	0.00910015					17.3988	0.00227829					10.0318	0.0721206
			10.0371	0.000663641					10.0373	0.00906252					17.4041	0.00235725					10.0371	0.0711686
			10.0424	0.000675027					10.0425	0.00904238					17.4093	0.00236125					10.0423	0.0701035
			10.0476	0.00088483					10.0478	0.00902223					17.4146	0.00235825					10.0476	0.0691649
			10.0529	0.000966365					10.053	0.00895882					17.4199	0.00235526					10.0529	0.0681946
			10.0582	0.00095663					10.0583	0.00875983					17.4251	0.00233887					10.0581	0.0672823
			10.0634	0.000946895					10.0636	0.00857703					17.4304	0.00232386					10.0634	0.0663562
			10.0687	0.000682454					10.0688	0.00843914					17.4357	0.00231699					10.0687	0.0654416
			10.074	0.000466502					10.0741	0.00833494					17.4409	0.00231013					10.0739	0.0642766
			10.0792	0.000343068					10.0794	0.00823538					17.4462	0.00228161					10.0792	0.0632144
			10.0845	0.000284674					10.0846	0.0080243					17.4515	0.00218959					10.0845	0.0623214
			10.0898	0.00022628					10.0899	0.00773827					17.4567	0.00214618					10.0897	0.0615217
			10.095	-0.000227245					10.0952	0.00751204					17.462	0.00215638					10.095	0.0607451
			10.1003	-0.000733222					10.1004	0.00743931					17.4673	0.00219711					10.1003	0.0599353
			10.1056	-0.000881943					10.1057	0.00742791					17.4725	0.00228197					10.1055	0.059123
			10.1108	-0.000793907					10.111	0.00744613					17.4778	0.00231732					10.1108	0.0583119
			10.1161	-0.000651144					10.1162	0.00744997					17.4831	0.00231373					10.1161	0.0574969
			10.1214	-0.00039067					10.1215	0.00737577					17.4883	0.00231013					10.1213	0.0566781
			10.1266	-0.000433805					10.1268	0.00730158					17.4936	0.00229893					10.1266	0.0558147
			10.1319	-0.000476941					10.132	0.00718741					17.4989	0.00228645					10.1319	0.0549201
			10.1372	-0.000586371					10.1373	0.00708953					17.5041	0.00227869					10.1371	0.0541657
			10.1424	-0.000696905					10.1426	0.00700924					17.5094	0.00227094					10.1424	0.0533108
			10.1477	-0.000750682					10.1478	0.00696163					17.5146	0.0022475					10.1477	0.0525133
			10.153	-0.000836633					10.1531	0.00684565					17.5199	0.00214875					10.1529	0.0517817
			10.1582	-0.000922585					10.1584	0.00656335					17.5252	0.00208244					10.1582	0.0510377
			10.1635	-0.0010966					10.1636	0.00632591					17.5304	0.00210055					10.1635	0.0502389
			10.1688	-0.00171615					10.1689	0.00624348					17.5357	0.00214383					10.1687	0.0496085
			10.174	-0.00198852					10.1742	0.00626614					17.541	0.00221178					10.174	0.0490169
			10.1793	-0.00193316					10.1794	0.00635658					17.5462	0.00228692					10.1793	0.0483202
			10.1846	-0.00179861					10.1847	0.00639685					17.5515	0.00228033					10.1845	0.0476791
			10.1898	-0.00154513					10.19	0.00639602					17.5568	0.00227375					10.1898	0.0470238
			10.1951	-0.00143331					10.1952	0.00633583					17.562	0.0022578					10.1951	0.0464446
			10.2004	-0.00143244					10.2005	0.00627564					17.5673	0.00223742					10.2003	0.0458303
			10.2056	-0.0015156					10.2058	0.00617005					17.5726	0.00223553					10.2056	0.0452474
[truncated: 2,234 more rows]

## Sheet: LBD and LBD-OD
LBD-OD	Wavelength	Ellipticity		LBD
	260	0.312954			260	0.0761525
	259	0.308539			259	0.0241207
	258	0.289575			258	0.0283258
	257	0.248458			257	0.044602
	256	0.243267			256	0.0335231
	255	0.218125			255	-0.0270435
	254	0.225075			254	-0.00338734
	253	0.24495			253	0.000538551
	252	0.200806			252	0.00170916
	251	0.183516			251	-0.0585642
	250	0.146005			250	-0.0710571
	249	0.143728			249	-0.116846
	248	0.157789			248	-0.138098
	247	0.142643			247	-0.189343
	246	0.160982			246	-0.283931
	245	0.125997			245	-0.351104
	244	0.0751353			244	-0.502222
	243	-0.00575605			243	-0.554074
	242	-0.122033			242	-0.579114
	241	-0.189351			241	-0.541714
	240	-0.297874			240	-0.614488
	239	-0.377677			239	-0.76584
	238	-0.561998			238	-0.955314
	237	-0.714405			237	-1.16963
	236	-0.839497			236	-1.26328
	235	-0.948007			235	-1.41316
	234	-1.10522			234	-1.54387
	233	-1.38059			233	-1.8237
	232	-1.70112			232	-1.97681
	231	-1.96322			231	-2.21323
	230	-2.25403			230	-2.38249
	229	-2.54716			229	-2.62939
	228	-2.92816			228	-2.77786
	227	-3.35032			227	-2.88624
	226	-3.7365			226	-2.98188
	225	-4.13277			225	-3.00218
	224	-4.53909			224	-3.03127
	223	-5.05769			223	-3.0522
	222	-5.60427			222	-3.13305
	221	-6.12103			221	-3.1726
	220	-6.58124			220	-3.15787
	219	-6.93092			219	-3.08525
	218	-7.28974			218	-3.06859
	217	-7.56039			217	-3.18686
	216	-7.85569			216	-3.51986
	215	-8.05922			215	-3.85964
	214	-8.18373			214	-4.23706
	213	-8.22928			213	-4.64595
	212	-8.29725			212	-5.14467
	211	-8.26			211	-5.8246
	210	-8.21444			210	-6.70462
	209	-8.11039			209	-7.91458
	208	-8.00719			208	-9.26104
	207	-7.82765			207	-10.757
	206	-7.60392			206	-12.4784
	205	-7.4051			205	-14.0581
	204	-7.32739			204	-15.8902
	203	-7.4981			203	-17.4779
	202	-8.07614			202	-19.0864
	201	-8.84222			201	-20.3314
	200	-9.59235			200	-21.5295
	199	-10.0715			199	-22.3627
	198	-10.4443			198	-23.0773
	197	-10.3711			197	-22.4741
	196	-10.826			196	-21.6779
	195	-10.7927			195	-20.1451
	194	-10.5801			194	-19.0377
	193	-10.1249			193	-17.66
	192	-8.74131			192	-15.1616
	191	-7.47			191	-12.8128
	190	-6.18647			190	-10.6794
	189	-5.41915
	188	-5.04828
	187	-5.3719
	186	-5.56201
	185	-5.97744

## Sheet: LBD-OD thermal denaturing
45	-8974.25
50	-11689.8
55	-14241
60	-17343
65	-19777.1
70	-19788

## Sheet: Sheet5
volume (mL)	Molar Mass 1									volume (mL)	RI
10.4189	83403.1									-0.315822	-0.000124794
10.4275	82674.5									-0.30705	-0.000126647
10.436	80933.3									-0.298278	-0.000129762
10.4445	79174.7									-0.289506	-0.000130456
10.4531	77394.9									-0.280734	-0.000131112
10.4616	75608.8									-0.271962	-0.000132886
10.4701	74438.2									-0.26319	-0.000132738
10.4787	73768.5									-0.254418	-0.00013183
10.4872	72786.7									-0.245646	-0.000129577
10.4957	71542.5									-0.236874	-0.000127169
10.5043	70267.9									-0.228102	-0.000126832
10.5128	69108.4									-0.21933	-0.000125944
10.5213	68086.8									-0.210558	-0.00012433
10.5299	67091.2									-0.201786	-0.000124422
10.5384	66144									-0.193014	-0.000124515
10.5469	65370.1									-0.184242	-0.000123503
10.5555	64564.6									-0.17547	-0.000120836
10.564	63679.1									-0.166698	-0.000119264
10.5725	62982.9									-0.157926	-0.000119013
10.5811	62369									-0.149154	-0.000118917
10.5896	61704.3									-0.140382	-0.000119214
10.5981	61106.3									-0.13161	-0.000119511
10.6067	60476.2									-0.122838	-0.000120033
10.6152	59899.1									-0.114066	-0.000121079
10.6237	59396.2									-0.105294	-0.000119509
10.6323	58970.9									-0.0965219	-0.000119029
10.6408	58623.1									-0.0877499	-0.00011855
10.6493	58122.9									-0.0789779	-0.000118011
10.6579	57567.9									-0.0702059	-0.000116355
10.6664	57116.3									-0.0614339	-0.000116244
10.6749	56783.7									-0.0526619	-0.000116062
10.6835	56493.8									-0.0438899	-0.000114072
10.692	56206.5									-0.0351179	-0.000111678
10.7005	55908.1									-0.0263459	-0.000108331
10.7091	55584.6									-0.0175739	-0.000106442
10.7176	55336									-0.00880192	-0.000104867
10.7261	55159.8									-2.99e-05	-0.000102325
10.7347	54932.8									0.00874208	-0.000101552
10.7432	54681.5									0.0175141	-0.000101184
10.7517	54447.9									0.0262861	-9.93e-05
10.7603	54298.6									0.0350581	-9.55e-05
10.7688	54215									0.0438301	-9.27e-05
10.7773	54040.3									0.0526021	-9.05e-05
10.7859	53843.1									0.0613741	-8.79e-05
10.7944	53674.8									0.0701461	-8.6e-05
10.8029	53488.2									0.078918	-8.39e-05
10.8115	53270.5									0.08769	-8.27e-05
10.82	53035.8									0.096462	-8.1e-05
10.8285	52818.4									0.105234	-7.8e-05
10.8371	52628.4									0.114006	-7.59e-05
10.8456	52459.9									0.122778	-7.47e-05
10.8541	52335.9									0.13155	-7.3e-05
10.8627	52260.2									0.140322	-7.1e-05
10.8712	52197.2									0.149094	-7.06e-05
10.8797	52121									0.157866	-7.06e-05
10.8883	52027									0.166638	-6.86e-05
10.8968	51931.1									0.17541	-6.59e-05
10.9053	51862.3									0.184182	-6.33e-05
10.9139	51815.1									0.192954	-6.17e-05
10.9224	51757.1									0.201726	-6.11e-05
10.9309	51686.7									0.210498	-5.93e-05
10.9395	51614.2									0.21927	-5.95e-05
10.948	51531.6									0.228042	-5.97e-05
10.9565	51409.5									0.236814	-6e-05
10.9651	51279.4									0.245586	-5.83e-05
10.9736	51203.7									0.254358	-5.73e-05
10.9821	51192.8									0.26313	-5.63e-05
10.9907	51171.5									0.271902	-5.59e-05
10.9992	51140.1									0.280674	-5.47e-05
11.0077	51034.6									0.289446	-5.47e-05
11.0163	50954.2									0.298218	-5.47e-05
11.0248	50920.3									0.30699	-5.44e-05
11.0333	50900.1									0.315762	-5.24e-05
11.0419	50828.6									0.324534	-5.08e-05
11.0504	50739.5									0.333306	-5.06e-05
11.0589	50690.2									0.342078	-4.99e-05
11.0675	50653.7									0.35085	-5e-05
11.076	50638.1									0.359622	-5.02e-05
11.0845	50634.7									0.368394	-5.03e-05
11.0931	50617.3									0.377166	-4.97e-05
11.1016	50564.4									0.385938	-4.74e-05
11.1101	50492.7									0.39471	-4.58e-05
11.1187	50419.7									0.403482	-4.48e-05
11.1272	50365.7									0.412254	-4.34e-05
11.1357	50317.1									0.421026	-4.21e-05
11.1443	50249.7									0.429798	-4.12e-05
11.1528	50223.2									0.43857	-4e-05
11.1613	50218.5									0.447342	-3.86e-05
11.1699	50185.8									0.456114	-3.49e-05
11.1784	50121.9									0.464886	-3.17e-05
11.1869	50042.2									0.473658	-3.06e-05
11.1955	49977.1									0.48243	-2.88e-05
11.204	49925.3									0.491202	-2.6e-05
11.2125	49874.7									0.499974	-2.49e-05
11.2211	49818.6									0.508746	-2.46e-05
11.2296	49780.9									0.517518	-2.2e-05
11.2381	49803.1									0.52629	-1.83e-05
11.2467	49833									0.535062	-1.51e-05
11.2552	49795.5									0.543834	-1.31e-05
11.2637	49733.7									0.552606	-1.07e-05
11.2723	49710.7									0.561378	-8.59e-06
11.2808	49694.5									0.57015	-8.13e-06
11.2893	49647.8									0.578922	-6.96e-06
11.2979	49600.1									0.587694	-4.26e-06
11.3064	49629.8									0.596466	-1.26e-06
11.3149	49754.1									0.605238	1.31e-06
11.3235	49811.9									0.61401	2.9e-06
11.332	49742.6									0.622782	5.21e-06
11.3405	49684									0.631554	8.07e-06
11.3491	49691.8									0.640326	9.07e-06
11.3576	49745.7									0.649098	9.58e-06
11.3661	49794.5									0.65787	1.14e-05
11.3747	49831.7									0.666642	1.52e-05
11.3832	49895.5									0.675414	1.88e-05
11.3917	49928.9									0.684186	2e-05
11.4003	49918.1									0.692958	2.21e-05
11.4088	49978.3									0.70173	2.42e-05
11.4173	50046.8									0.710502	2.53e-05
11.4259	50018.7									0.719274	2.67e-05
11.4344	49989									0.728046	2.93e-05
11.4429	49970.2									0.736818	3.3e-05
11.4515	49977.8									0.74559	3.59e-05
11.46	50057.9									0.754362	3.74e-05
11.4685	50122.9									0.763134	3.85e-05
11.4771	50165.3									0.771906	4.05e-05
11.4856	50257.2									0.780678	4.17e-05
11.4941	50357									0.78945	4.21e-05
11.5027	50438.1									0.798222	4.37e-05
11.5112	50633.7									0.806994	4.63e-05
11.5197	50864.4									0.815766	4.85e-05
11.5283	50633.2									0.824538	4.99e-05
										0.83331	5.08e-05
										0.842082	5.08e-05
										0.850854	5.07e-05
										0.859626	5.05e-05
										0.868398	5.07e-05
										0.87717	5.31e-05
										0.885942	5.34e-05
										0.894714	5.36e-05
										0.903486	5.37e-05
										0.912258	5.35e-05
										0.92103	5.32e-05
										0.929802	5.28e-05
										0.938574	5.29e-05
										0.947346	5.51e-05
										0.956118	5.65e-05
										0.96489	5.68e-05
										0.973662	5.67e-05
										0.982434	5.64e-05
										0.991206	5.62e-05
										0.999978	5.58e-05
										1.00875	5.51e-05
										1.01752	5.58e-05
										1.02629	5.56e-05
										1.03507	5.54e-05
										1.04384	5.5e-05
										1.05261	5.4e-05
										1.06138	5.27e-05
										1.07015	5.04e-05
										1.07893	4.89e-05
										1.0877	5.01e-05
										1.09647	5e-05
										1.10524	4.98e-05
										1.11401	4.97e-05
										1.12279	4.95e-05
										1.13156	4.93e-05
										1.14033	4.89e-05
										1.1491	5e-05
										1.15787	5.03e-05
										1.16665	4.99e-05
										1.17542	4.94e-05
										1.18419	4.87e-05
										1.19296	4.77e-05
										1.20173	4.61e-05
										1.21051	4.5e-05
										1.21928	4.49e-05
										1.22805	4.48e-05
										1.23682	4.46e-05
										1.24559	4.44e-05
										1.25437	4.39e-05
										1.26314	4.35e-05
										1.27191	4.21e-05
										1.28068	3.92e-05
										1.28945	3.88e-05
										1.29823	3.82e-05
										1.307	3.76e-05
										1.31577	3.65e-05
										1.32454	3.55e-05
										1.33331	3.52e-05
										1.34209	3.3e-05
										1.35086	3.09e-05
										1.35963	3.11e-05
										1.3684	3.11e-05
										1.37717	3.08e-05
										1.38595	3.05e-05
										1.39472	3.03e-05
										1.40349	2.98e-05
										1.41226	2.92e-05
										1.42103	2.83e-05
										1.42981	2.82e-05
										1.43858	2.83e-05
										1.44735	2.82e-05
										1.45612	2.8e-05
										1.46489	2.6e-05
										1.47367	2.38e-05
										1.48244	2.16e-05
										1.49121	2.04e-05
										1.49998	1.97e-05
										1.50875	2.04e-05
										1.51753	2.05e-05
										1.5263	2.04e-05
										1.53507	2e-05
										1.54384	1.96e-05
										1.55261	1.9e-05
										1.56139	1.73e-05
										1.57016	1.72e-05
										1.57893	1.85e-05
										1.5877	2e-05
										1.59647	2.03e-05
										1.60525	2.05e-05
										1.61402	2.01e-05
										1.62279	1.97e-05
										1.63156	1.88e-05
										1.64033	1.95e-05
										1.64911	2.07e-05
										1.65788	2.1e-05
										1.66665	2.14e-05
										1.67542	2.16e-05
										1.68419	2.15e-05
										1.69297	2.13e-05
										1.70174	2.12e-05
										1.71051	2.1e-05
										1.71928	2.09e-05
										1.72805	2.07e-05
										1.73683	2.05e-05
										1.7456	1.94e-05
										1.75437	1.86e-05
										1.76314	1.67e-05
										1.77191	1.54e-05
										1.78069	1.63e-05
										1.78946	1.7e-05
										1.79823	1.74e-05
										1.807	1.88e-05
										1.81577	2.01e-05
										1.82455	2.05e-05
										1.83332	2.06e-05
										1.84209	2.07e-05
										1.85086	2.27e-05
										1.85963	2.57e-05
										1.86841	2.57e-05
										1.87718	2.58e-05
										1.88595	2.61e-05
										1.89472	2.61e-05
										1.90349	2.61e-05
										1.91227	2.68e-05
										1.92104	2.87e-05
										1.92981	3.02e-05
										1.93858	3.23e-05
										1.94735	3.43e-05
										1.95613	3.6e-05
										1.9649	3.74e-05
										1.97367	3.75e-05
										1.98244	3.76e-05
										1.99121	3.89e-05
										1.99999	4.18e-05
										2.00876	4.31e-05
										2.01753	4.3e-05
										2.0263	4.24e-05
										2.03507	4.17e-05
										2.04385	4.02e-05
										2.05262	3.83e-05
										2.06139	3.79e-05
										2.07016	3.92e-05
										2.07893	3.97e-05
										2.08771	4.01e-05
										2.09648	4.03e-05
										2.10525	4.09e-05
										2.11402	4.16e-05
										2.12279	4.23e-05
										2.13157	4.4e-05
										2.14034	4.69e-05
										2.14911	4.86e-05
										2.15788	4.91e-05
										2.16665	5.05e-05
										2.17543	5.19e-05
										2.1842	5.32e-05
										2.19297	5.38e-05
										2.20174	5.57e-05
										2.21051	5.91e-05
										2.21929	6.07e-05
										2.22806	6.11e-05
										2.23683	6.18e-05
										2.2456	6.17e-05
										2.25437	6.14e-05
										2.26315	6.11e-05
										2.27192	6.16e-05
										2.28069	6.39e-05
										2.28946	6.59e-05
										2.29823	6.59e-05
										2.30701	6.69e-05
										2.31578	6.76e-05
										2.32455	6.82e-05
										2.33332	6.81e-05
										2.34209	6.94e-05
										2.35087	7.25e-05
										2.35964	7.43e-05
										2.36841	7.47e-05
										2.37718	7.62e-05
										2.38595	7.61e-05
										2.39473	7.58e-05
										2.4035	7.56e-05
										2.41227	7.65e-05
										2.42104	7.76e-05
										2.42981	7.8e-05
										2.43859	7.8e-05
										2.44736	7.78e-05
										2.45613	7.76e-05
										2.4649	7.74e-05
										2.47367	7.52e-05
										2.48245	7.52e-05
										2.49122	7.5e-05
										2.49999	7.48e-05
										2.50876	7.43e-05
										2.51753	7.4e-05
										2.52631	7.36e-05
										2.53508	7.31e-05
										2.54385	7.17e-05
										2.55262	7.33e-05
										2.56139	7.4e-05
										2.57017	7.42e-05
										2.57894	7.44e-05
										2.58771	7.43e-05
										2.59648	7.42e-05
										2.60525	7.34e-05
										2.61403	7.25e-05
										2.6228	7.25e-05
										2.63157	7.29e-05
										2.64034	7.27e-05
										2.64911	7.25e-05
										2.65789	7.18e-05
										2.66666	7.1e-05
										2.67543	6.93e-05
										2.6842	6.68e-05
										2.69297	6.59e-05
										2.70174	6.43e-05
										2.71052	6.31e-05
										2.71929	6.14e-05
										2.72806	5.93e-05
										2.73683	5.79e-05
										2.7456	5.55e-05
										2.75438	5.16e-05
										2.76315	5.03e-05
										2.77192	5.01e-05
										2.78069	4.99e-05
										2.78946	4.88e-05
										2.79824	4.76e-05
										2.80701	4.66e-05
										2.81578	4.52e-05
										2.82455	4.35e-05
										2.83332	4.26e-05
										2.8421	4.22e-05
										2.85087	4.18e-05
										2.85964	3.91e-05
										2.86841	3.77e-05
										2.87718	3.63e-05
										2.88596	3.24e-05
										2.89473	2.96e-05
										2.9035	2.87e-05
										2.91227	2.73e-05
										2.92104	2.59e-05
										2.92982	2.41e-05
										2.93859	2.14e-05
										2.94736	1.9e-05
										2.95613	1.59e-05
										2.9649	1.26e-05
										2.97368	1.22e-05
										2.98245	1.14e-05
										2.99122	1.06e-05
										2.99999	8.15e-06
										3.00876	6.47e-06
										3.01754	4.22e-06
										3.02631	1.57e-06
										3.03508	-1.74e-06
										3.04385	-3.51e-06
										3.05262	-4.05e-06
										3.0614	-4.59e-06
										3.07017	-7.14e-06
										3.07894	-8.33e-06
										3.08771	-9.4e-06
										3.09648	-1.29e-05
										3.10526	-1.62e-05
										3.11403	-1.8e-05
										3.1228	-1.93e-05
										3.13157	-2.06e-05
										3.14034	-2.28e-05
										3.14912	-2.52e-05
										3.15789	-2.75e-05
										3.16666	-3.06e-05
										3.17543	-3.43e-05
										3.1842	-3.5e-05
										3.19298	-3.58e-05
										3.20175	-3.66e-05
										3.21052	-3.88e-05
										3.21929	-3.99e-05
										3.22806	-4.22e-05
										3.23684	-4.56e-05
										3.24561	-4.78e-05
										3.25438	-4.88e-05
										3.26315	-4.9e-05
										3.27192	-4.92e-05
										3.2807	-5.21e-05
										3.28947	-5.32e-05
										3.29824	-5.39e-05
										3.30701	-5.65e-05
										3.31578	-5.84e-05
										3.32456	-5.85e-05
										3.33333	-5.87e-05
										3.3421	-5.98e-05
										3.35087	-6.12e-05
										3.35964	-6.2e-05
										3.36842	-6.3e-05
										3.37719	-6.48e-05
										3.38596	-6.7e-05
										3.39473	-6.72e-05
										3.4035	-6.74e-05
										3.41228	-6.77e-05
										3.42105	-6.83e-05
										3.42982	-6.86e-05
										3.43859	-6.89e-05
										3.44736	-6.96e-05
										3.45614	-7.08e-05
										3.46491	-7.04e-05
										3.47368	-7.02e-05
										3.48245	-7.05e-05
										3.49122	-7.08e-05
										3.5	-7.25e-05
										3.50877	-7.3e-05
										3.51754	-7.34e-05
										3.52631	-7.5e-05
										3.53508	-7.37e-05
										3.54386	-7.3e-05
										3.55263	-7.22e-05
										3.5614	-7.24e-05
										3.57017	-7.23e-05
										3.57894	-7.24e-05
										3.58772	-7.29e-05
										3.59649	-7.34e-05
										3.60526	-7.25e-05
										3.61403	-7.19e-05
										3.6228	-7.18e-05
										3.63158	-7.19e-05
										3.64035	-7.25e-05
										3.64912	-7.31e-05
										3.65789	-7.56e-05
										3.66666	-7.66e-05
										3.67544	-7.6e-05
										3.68421	-7.55e-05
										3.69298	-7.55e-05
										3.70175	-7.54e-05
										3.71052	-7.55e-05
										3.7193	-7.45e-05
										3.72807	-7.46e-05
										3.73684	-7.46e-05
										3.74561	-7.34e-05
										3.75438	-7.04e-05
										3.76316	-6.83e-05
										3.77193	-6.79e-05
										3.7807	-6.7e-05
										3.78947	-6.61e-05
										3.79824	-6.6e-05
										3.80702	-6.59e-05
										3.81579	-6.46e-05
										3.82456	-6.35e-05
										3.83333	-6.31e-05
										3.8421	-6.27e-05
										3.85088	-6.31e-05
										3.85965	-6.35e-05
										3.86842	-6.44e-05
										3.87719	-6.54e-05
										3.88596	-6.45e-05
										3.89474	-6.28e-05
										3.90351	-6.16e-05
										3.91228	-6.14e-05
										3.92105	-6.1e-05
										3.92982	-6.03e-05
										3.9386	-6.04e-05
										3.94737	-5.91e-05
										3.95614	-5.57e-05
										3.96491	-5.15e-05
										3.97368	-4.96e-05
										3.98246	-4.76e-05
										3.99123	-4.54e-05
										4	-4.37e-05
										4.00877	-4.2e-05
										4.01754	-3.96e-05
										4.02632	-3.71e-05
										4.03509	-3.37e-05
										4.04386	-3.05e-05
										4.05263	-2.97e-05
										4.0614	-2.93e-05
										4.07018	-2.92e-05
										4.07895	-2.91e-05
										4.08772	-2.88e-05
										4.09649	-2.63e-05
										4.10526	-2.36e-05
										4.11404	-2.18e-05
										4.12281	-2.05e-05
										4.13158	-1.88e-05
										4.14035	-1.68e-05
										4.14912	-1.63e-05
										4.1579	-1.49e-05
										4.16667	-1.13e-05
										4.17544	-7.99e-06
										4.18421	-6.65e-06
										4.19298	-5.72e-06
										4.20176	-3.96e-06
										4.21053	-2.48e-06
										4.2193	-1.91e-06
										4.22807	-1.93e-07
										4.23684	2.2e-06
										4.24562	4.6e-06
										4.25439	6.61e-06
										4.26316	7.68e-06
										4.27193	9.98e-06
										4.2807	1.01e-05
										4.28948	1.02e-05
										4.29825	1.08e-05
										4.30702	1.4e-05
										4.31579	1.59e-05
										4.32456	1.72e-05
										4.33334	1.86e-05
										4.34211	1.94e-05
										4.35088	1.94e-05
										4.35965	1.94e-05
										4.36842	1.93e-05
										4.3772	2.05e-05
										4.38597	2.14e-05
										4.39474	2.17e-05
										4.40351	2.17e-05
										4.41228	2.16e-05
										4.42106	2.09e-05
										4.42983	2.01e-05
										4.4386	2e-05
										4.44737	2.07e-05
										4.45614	2.11e-05
										4.46492	2.1e-05
										4.47369	2.09e-05
										4.48246	2.03e-05
										4.49123	1.96e-05
										4.5	1.84e-05
										4.50878	1.62e-05
										4.51755	1.52e-05
										4.52632	1.48e-05
										4.53509	1.44e-05
										4.54386	1.36e-05
										4.55264	1.29e-05
										4.56141	1.12e-05
										4.57018	9.02e-06
										4.57895	7.9e-06
										4.58772	8.04e-06
										4.5965	7.63e-06
										4.60527	7.22e-06
										4.61404	6.32e-06
										4.62281	5.24e-06
										4.63158	3.63e-06
										4.64036	1.14e-06
										4.64913	-6.53e-07
										4.6579	-2.12e-06
										4.66667	-3.09e-06
										4.67544	-4.21e-06
										4.68422	-6.36e-06
										4.69299	-8.68e-06
										4.70176	-1.02e-05
										4.71053	-1.25e-05
										4.7193	-1.5e-05
										4.72808	-1.5e-05
										4.73685	-1.53e-05
										4.74562	-1.56e-05
										4.75439	-1.63e-05
										4.76316	-1.68e-05
										4.77194	-1.73e-05
										4.78071	-1.99e-05
										4.78948	-2.22e-05
										4.79825	-2.34e-05
										4.80702	-2.41e-05
										4.8158	-2.48e-05
										4.82457	-2.64e-05
										4.83334	-2.69e-05
										4.84211	-2.81e-05
										4.85088	-3.03e-05
										4.85966	-3.26e-05
										4.86843	-3.27e-05
										4.8772	-3.32e-05
										4.88597	-3.38e-05
										4.89474	-3.47e-05
										4.90352	-3.6e-05
										4.91229	-3.79e-05
										4.92106	-4.03e-05
										4.92983	-4.24e-05
										4.9386	-4.25e-05
										4.94738	-4.29e-05
										4.95615	-4.33e-05
										4.96492	-4.43e-05
										4.97369	-4.45e-05
										4.98246	-4.53e-05
										4.99124	-4.7e-05
										5.00001	-4.83e-05
										5.00878	-4.84e-05
										5.01755	-4.87e-05
										5.02632	-4.91e-05
										5.0351	-5.09e-05
										5.04387	-5.15e-05
										5.05264	-5.21e-05
										5.06141	-5.44e-05
										5.07018	-5.44e-05
										5.07896	-5.33e-05
										5.08773	-5.35e-05
										5.0965	-5.37e-05
										5.10527	-5.44e-05
										5.11404	-5.46e-05
										5.12282	-5.51e-05
										5.13159	-5.56e-05
										5.14036	-5.58e-05
										5.14913	-5.45e-05
										5.1579	-5.22e-05
										5.16668	-5.19e-05
										5.17545	-5.17e-05
										5.18422	-5.16e-05
										5.19299	-5.16e-05
										5.20176	-5.17e-05
										5.21054	-5.18e-05
										5.21931	-5.04e-05
										5.22808	-4.93e-05
										5.23685	-4.88e-05
										5.24562	-4.84e-05
										5.2544	-4.86e-05
										5.26317	-4.88e-05
										5.27194	-4.96e-05
										5.28071	-5.01e-05
										5.28948	-4.83e-05
										5.29826	-4.67e-05
										5.30703	-4.64e-05
										5.3158	-4.64e-05
										5.32457	-4.64e-05
										5.33334	-4.61e-05
										5.34212	-4.6e-05
										5.35089	-4.56e-05
										5.35966	-4.3e-05
										5.36843	-4.12e-05
										5.3772	-4.07e-05
										5.38598	-3.97e-05
										5.39475	-3.82e-05
										5.40352	-3.74e-05
										5.41229	-3.74e-05
										5.42106	-3.65e-05
										5.42984	-3.53e-05
										5.43861	-3.48e-05
										5.44738	-3.47e-05
										5.45615	-3.47e-05
										5.46492	-3.47e-05
										5.4737	-3.51e-05
										5.48247	-3.55e-05
										5.49124	-3.66e-05
										5.50001	-3.54e-05
										5.50878	-3.43e-05
										5.51756	-3.43e-05
										5.52633	-3.44e-05
										5.5351	-3.43e-05
										5.54387	-3.43e-05
										5.55264	-3.42e-05
										5.56142	-3.39e-05
										5.57019	-3.22e-05
										5.57896	-2.99e-05
										5.58773	-2.85e-05
										5.5965	-2.76e-05
										5.60528	-2.61e-05
										5.61405	-2.61e-05
										5.62282	-2.61e-05
										5.63159	-2.62e-05
										5.64036	-2.5e-05
										5.64914	-2.49e-05
										5.65791	-2.49e-05
										5.66668	-2.5e-05
										5.67545	-2.52e-05
										5.68422	-2.54e-05
										5.693	-2.75e-05
										5.70177	-2.85e-05
										5.71054	-2.78e-05
										5.71931	-2.76e-05
										5.72808	-2.77e-05
										5.73686	-2.82e-05
										5.74563	-2.87e-05
										5.7544	-2.97e-05
										5.76317	-3.21e-05
										5.77194	-3.37e-05
										5.78072	-3.36e-05
										5.78949	-3.36e-05
										5.79826	-3.49e-05
										5.80703	-3.61e-05
										5.8158	-3.69e-05
										5.82458	-3.81e-05
										5.83335	-4.12e-05
										5.84212	-4.33e-05
										5.85089	-4.35e-05
										5.85966	-4.37e-05
										5.86844	-4.4e-05
										5.87721	-4.62e-05
										5.88598	-4.74e-05
										5.89475	-4.9e-05
										5.90352	-5.15e-05
										5.9123	-5.27e-05
										5.92107	-5.34e-05
										5.92984	-5.46e-05
										5.93861	-5.65e-05
										5.94738	-5.81e-05
										5.95616	-5.96e-05
										5.96493	-6.24e-05
										5.9737	-6.52e-05
										5.98247	-6.76e-05
										5.99124	-6.83e-05
										6.00002	-6.92e-05
										6.00879	-7.01e-05
										6.01756	-7.35e-05
										6.02633	-7.51e-05
										6.0351	-7.6e-05
										6.04388	-7.85e-05
										6.05265	-8.01e-05
										6.06142	-8.06e-05
										6.07019	-8.1e-05
										6.07896	-8.17e-05
										6.08774	-8.3e-05
										6.09651	-8.45e-05
										6.10528	-8.68e-05
										6.11405	-8.96e-05
										6.12282	-9.15e-05
										6.1316	-9.19e-05
										6.14037	-9.22e-05
										6.14914	-9.33e-05
										6.15791	-9.37e-05
										6.16668	-9.4e-05
										6.17546	-9.52e-05
										6.18423	-9.68e-05
										6.193	-9.77e-05
										6.20177	-9.63e-05
										6.21054	-9.58e-05
										6.21932	-9.58e-05
										6.22809	-9.59e-05
										6.23686	-9.64e-05
										6.24563	-9.68e-05
										6.2544	-9.78e-05
										6.26318	-9.84e-05
										6.27195	-9.71e-05
										6.28072	-9.69e-05
										6.28949	-9.69e-05
										6.29826	-9.7e-05
										6.30704	-9.73e-05
										6.31581	-9.76e-05
										6.32458	-9.94e-05
										6.33335	-0.000100265
										6.34212	-9.81e-05
										6.3509	-9.81e-05
										6.35967	-9.83e-05
										6.36844	-9.86e-05
										6.37721	-9.87e-05
										6.38598	-9.88e-05
										6.39476	-9.9e-05
										6.40353	-9.91e-05
										6.4123	-9.68e-05
										6.42107	-9.66e-05
										6.42984	-9.63e-05
										6.43862	-9.6e-05
										6.44739	-9.47e-05
										6.45616	-9.42e-05
										6.46493	-9.43e-05
										6.4737	-9.37e-05
										6.48248	-9.18e-05
										6.49125	-9.11e-05
										6.50002	-9.03e-05
										6.50879	-8.93e-05
										6.51756	-8.86e-05
										6.52634	-8.84e-05
										6.53511	-8.83e-05
										6.54388	-8.71e-05
										6.55265	-8.55e-05
										6.56142	-8.32e-05
										6.5702	-8.19e-05
										6.57897	-8.09e-05
										6.58774	-7.93e-05
										6.59651	-7.94e-05
										6.60528	-7.95e-05
										6.61406	-7.9e-05
										6.62283	-7.71e-05
										6.6316	-7.57e-05
										6.64037	-7.54e-05
										6.64914	-7.47e-05
										6.65792	-7.43e-05
										6.66669	-7.44e-05
										6.67546	-7.46e-05
										6.68423	-7.49e-05
										6.693	-7.37e-05
										6.70178	-7.22e-05
										6.71055	-7.17e-05
										6.71932	-7.15e-05
										6.72809	-7.15e-05
										6.73686	-7.16e-05
										6.74564	-7.16e-05
										6.75441	-7.13e-05
										6.76318	-6.96e-05
										6.77195	-6.74e-05
										6.78072	-6.7e-05
										6.7895	-6.69e-05
										6.79827	-6.7e-05
										6.80704	-6.73e-05
										6.81581	-6.77e-05
										6.82458	-6.76e-05
										6.83336	-6.57e-05
										6.84213	-6.56e-05
										6.8509	-6.55e-05
										6.85967	-6.57e-05
										6.86844	-6.6e-05
										6.87722	-6.65e-05
										6.88599	-6.72e-05
										6.89476	-6.69e-05
										6.90353	-6.56e-05
										6.9123	-6.46e-05
										6.92108	-6.44e-05
										6.92985	-6.41e-05
										6.93862	-6.47e-05
										6.94739	-6.53e-05
										6.95616	-6.66e-05
										6.96494	-6.67e-05
										6.97371	-6.55e-05
										6.98248	-6.51e-05
										6.99125	-6.46e-05
										7.00002	-6.46e-05
										7.0088	-6.46e-05
										7.01757	-6.47e-05
										7.02634	-6.48e-05
										7.03511	-6.39e-05
										7.04388	-6.22e-05
										7.05266	-6.03e-05
										7.06143	-6.02e-05
										7.0702	-6.02e-05
										7.07897	-6.04e-05
										7.08774	-6.05e-05
										7.09652	-6.11e-05
										7.10529	-6.14e-05
										7.11406	-5.96e-05
										7.12283	-5.7e-05
										7.1316	-5.6e-05
										7.14038	-5.54e-05
										7.14915	-5.38e-05
										7.15792	-5.36e-05
										7.16669	-5.34e-05
										7.17546	-5.27e-05
										7.18424	-4.92e-05
										7.19301	-4.55e-05
										7.20178	-4.39e-05
										7.21055	-4.2e-05
										7.21932	-3.95e-05
										7.2281	-3.8e-05
										7.23687	-3.59e-05
										7.24564	-3.32e-05
										7.25441	-2.95e-05
										7.26318	-2.45e-05
										7.27196	-2.09e-05
										7.28073	-1.76e-05
										7.2895	-1.34e-05
										7.29827	-1.01e-05
										7.30704	-7.35e-06
										7.31582	-3.74e-06
										7.32459	1.14e-06
										7.33336	5.97e-06
										7.34213	9.14e-06
										7.3509	1.23e-05
										7.35968	1.54e-05
										7.36845	1.84e-05
										7.37722	2.09e-05
										7.38599	2.34e-05
										7.39476	2.87e-05
										7.40354	3.34e-05
										7.41231	3.55e-05
										7.42108	3.91e-05
										7.42985	4.31e-05
										7.43862	4.53e-05
										7.4474	4.77e-05
										7.45617	5.17e-05
										7.46494	5.73e-05
										7.47371	6.28e-05
										7.48248	6.66e-05
										7.49126	7.04e-05
										7.50003	7.51e-05
										7.5088	7.81e-05
										7.51757	8.05e-05
										7.52634	8.5e-05
										7.53512	9.12e-05
										7.54389	9.65e-05
										7.55266	9.96e-05
										7.56143	0.00010353
										7.5702	0.000107742
										7.57898	0.000110869
										7.58775	0.000113391
										7.59652	0.000115964
										7.60529	0.000121368
										7.61406	0.00012737
										7.62284	0.000130837
										7.63161	0.000134904
										7.64038	0.00014033
										7.64915	0.000144807
										7.65792	0.000148536
										7.6667	0.000154416
										7.67547	0.000161383
										7.68424	0.000168296
										7.69301	0.000174379
										7.70178	0.000179369
										7.71055	0.000185129
										7.71933	0.000189733
										7.7281	0.000193656
										7.73687	0.000199885
										7.74564	0.000207913
										7.75441	0.000215076
										7.76319	0.000221134
										7.77196	0.000227187
										7.78073	0.00023373
										7.7895	0.000240201
										7.79827	0.000246568
										7.80705	0.000253751
										7.81582	0.00026269
										7.82459	0.000272392
										7.83336	0.000280669
										7.84213	0.000288829
										7.85091	0.00029832
										7.85968	0.000307471
										7.86845	0.000315983
										7.87722	0.000326092
										7.88599	0.000337921
										7.89477	0.000349203
										7.90354	0.000359171
										7.91231	0.00036889
										7.92108	0.000379374
										7.92985	0.000390111
										7.93863	0.000400928
										7.9474	0.000413026
										7.95617	0.000425664
										7.96494	0.000437298
										7.97371	0.000448279
										7.98249	0.000460551
										7.99126	0.000472106
										8.00003	0.000481092
										8.0088	0.000490424
										8.01757	0.000500911
										8.02635	0.000512826
										8.03512	0.000524095
										8.04389	0.000532898
										8.05266	0.000541095
										8.06143	0.000549023
										8.07021	0.00055546
										8.07898	0.000561156
										8.08775	0.000568024
										8.09652	0.000575374
										8.10529	0.000581407
										8.11407	0.000585546
										8.12284	0.000589355
										8.13161	0.000593589
										8.14038	0.000596574
										8.14915	0.000598063
										8.15793	0.000600575
										8.1667	0.000604832
										8.17547	0.000605828
										8.18424	0.000606823
										8.19301	0.000607842
										8.20179	0.000608035
										8.21056	0.00060805
										8.21933	0.000608065
										8.2281	0.000608221
										8.23687	0.000609428
										8.24565	0.000609316
										8.25442	0.000609142
										8.26319	0.000608968
										8.27196	0.000608716
										8.28073	0.000608464
										8.28951	0.000607217
										8.29828	0.000608837
										8.30705	0.000611863
										8.31582	0.000612234
										8.32459	0.000612605
										8.33337	0.000613866
										8.34214	0.000616243
										8.35091	0.000617195
										8.35968	0.000617083
										8.36845	0.000618641
										8.37723	0.000621791
										8.386	0.00062504
										8.39477	0.000626827
										8.40354	0.00062866
										8.41231	0.000631536
										8.42109	0.0006331
										8.42986	0.000634765
										8.43863	0.000638115
										8.4474	0.000642274
										8.45617	0.000646422
										8.46495	0.000649584
										8.47372	0.000651293
										8.48249	0.000654314
										8.49126	0.000657251
										8.50003	0.000658841
										8.50881	0.000661727
										8.51758	0.000666108
										8.52635	0.000669227
										8.53512	0.00067141
										8.54389	0.000675235
										8.55267	0.000679064
										8.56144	0.000682451
										8.57021	0.000684199
										8.57898	0.000686475
										8.58775	0.000692442
										8.59653	0.000698183
										8.6053	0.000701042
										8.61407	0.000704376
										8.62284	0.00070935
										8.63161	0.000713007
										8.64039	0.000716014
										8.64916	0.000720295
										8.65793	0.000725127
										8.6667	0.000729665
										8.67547	0.000734274
										8.68425	0.000738586
										8.69302	0.000741841
										8.70179	0.000744322
										8.71056	0.000746727
										8.71933	0.000750901
										8.72811	0.000756102
										8.73688	0.000759777
										8.74565	0.000763301
										8.75442	0.000768041
										8.76319	0.000771998
										8.77197	0.000775023
										8.78074	0.000778085
										8.78951	0.000782809
										8.79828	0.000789899
										8.80705	0.00079606
										8.81583	0.000801032
										8.8246	0.000806648
										8.83337	0.000812943
										8.84214	0.000818445
										8.85091	0.00082414
										8.85969	0.000831825
										8.86846	0.000840539
										8.87723	0.000848566
										8.886	0.000856246
										8.89477	0.000864563
										8.90355	0.000874013
										8.91232	0.000883036
										8.92109	0.000892375
										8.92986	0.000904354
										8.93863	0.000917737
										8.94741	0.000931003
										8.95618	0.000943765
										8.96495	0.000958123
										8.97372	0.000973039
										8.98249	0.000987311
										8.99127	0.00100352
										9.00004	0.00102167
										9.00881	0.00104127
										9.01758	0.00106088
										9.02635	0.00107979
										9.03513	0.00110018
										9.0439	0.00112153
										9.05267	0.00114184
										9.06144	0.00116174
										9.07021	0.00118432
										9.07899	0.00120827
										9.08776	0.00123138
										9.09653	0.00125432
										9.1053	0.00127812
										9.11407	0.0013021
										9.12285	0.00132573
										9.13162	0.00135059
										9.14039	0.00137726
										9.14916	0.00140541
										9.15793	0.00143309
										9.16671	0.00146033
										9.17548	0.00148901
										9.18425	0.00151843
										9.19302	0.0015481
										9.20179	0.00157988
										9.21057	0.00161421
										9.21934	0.00164992
										9.22811	0.00168644
										9.23688	0.00172372
										9.24565	0.00176336
										9.25443	0.00180414
										9.2632	0.00184548
										9.27197	0.00189011
										9.28074	0.00193828
										9.28951	0.00198892
										9.29829	0.00204157
										9.30706	0.00209633
										9.31583	0.00215402
										9.3246	0.00221456
										9.33337	0.00227794
										9.34215	0.0023461
										9.35092	0.00241845
										9.35969	0.00249402
										9.36846	0.00257181
										9.37723	0.00265188
										9.38601	0.00273768
										9.39478	0.00282624
										9.40355	0.00291625
										9.41232	0.00301191
										9.42109	0.0031118
										9.42987	0.00321348
										9.43864	0.00331642
										9.44741	0.00342257
										9.45618	0.00353322
										9.46495	0.00364477
										9.47373	0.00375729
										9.4825	0.0038741
										9.49127	0.00399467
										9.50004	0.00411447
										9.50881	0.00423342
										9.51759	0.00435344
										9.52636	0.00447451
										9.53513	0.00459531
										9.5439	0.00471398
										9.55267	0.00483321
										9.56145	0.00495316
										9.57022	0.00505529
										9.57899	0.00513042
										9.58776	0.00521762
										9.59653	0.00532652
										9.60531	0.00543202
										9.61408	0.00553254
										9.62285	0.00563209
										9.63162	0.00572982
										9.64039	0.00582169
										9.64917	0.00590776
										9.65794	0.00598955
										9.66671	0.00606855
										9.67548	0.00614273
										9.68425	0.00621082
										9.69303	0.00627625
										9.7018	0.00633974
										9.71057	0.00639749
										9.71934	0.00644938
										9.72811	0.00649783
										9.73689	0.00654385
										9.74566	0.00658529
										9.75443	0.00662193
										9.7632	0.00665719
										9.77197	0.00669099
										9.78075	0.00672111
										9.78952	0.00674766
										9.79829	0.00677231
										9.80706	0.00679565
										9.81583	0.00681676
										9.82461	0.00683592
										9.83338	0.00685602
										9.84215	0.00687709
										9.85092	0.00689824
										9.85969	0.00691876
										9.86847	0.00693952
										9.87724	0.00696234
										9.88601	0.00698627
										9.89478	0.00701137
										9.90355	0.00703913
										9.91233	0.00706962
										9.9211	0.00710348
										9.92987	0.00713834
										9.93864	0.00717446
										9.94741	0.00721531
										9.95619	0.00725861
										9.96496	0.00730328
										9.97373	0.00735238
										9.9825	0.0074068
										9.99127	0.00746366
										10	0.00752197
										10.0088	0.00758304
										10.0176	0.00764862
										10.0264	0.00771692
										10.0351	0.00778578
										10.0439	0.00785789
										10.0527	0.00793502
										10.0615	0.00801444
										10.0702	0.00809397
										10.079	0.00817576
										10.0878	0.00826059
										10.0965	0.00834665
										10.1053	0.00843428
										10.1141	0.00852435
										10.1229	0.00861786
										10.1316	0.00871291
										10.1404	0.00880721
										10.1492	0.00890298
										10.1579	0.00900229
										10.1667	0.00910267
										10.1755	0.00920458
										10.1843	0.00931164
										10.193	0.00942227
										10.2018	0.00953426
										10.2106	0.00964937
										10.2193	0.00977029
										10.2281	0.00989758
										10.2369	0.0100286
										10.2457	0.0101664
										10.2544	0.0103157
										10.2632	0.0104755
										10.272	0.0106431
										10.2807	0.0108193
										10.2895	0.0110101
										10.2983	0.0112182
										10.3071	0.0114404
										10.3158	0.0116803
										10.3246	0.0119447
										10.3334	0.0122329
										10.3422	0.0125411
										10.3509	0.0128708
										10.3597	0.0132315
										10.3685	0.0136274
										10.3772	0.0140511
										10.386	0.0145109
										10.3948	0.0150185
										10.4036	0.0155672
										10.4123	0.0161626
										10.4211	0.016812
										10.4299	0.0175092
										10.4386	0.01826
										10.4474	0.0190517
										10.4562	0.0199003
										10.465	0.0208284
										10.4737	0.0218058
										10.4825	0.0228213
										10.4913	0.0238908
										10.5	0.0250395
										10.5088	0.0262633
										10.5176	0.0275691
										10.5264	0.0289783
										10.5351	0.0304551
										10.5439	0.0319877
										10.5527	0.0335611
										10.5615	0.0351722
										10.5702	0.0368706
										10.579	0.0386671
										10.5878	0.0405079
										10.5965	0.0423996
										10.6053	0.0443938
										10.6141	0.0464471
										10.6229	0.0485109
										10.6316	0.0506167
										10.6404	0.0527975
										10.6492	0.0550296
										10.6579	0.0572803
										10.6667	0.0595686
										10.6755	0.0619261
										10.6843	0.0642924
										10.693	0.0666083
										10.7018	0.0689267
										10.7106	0.0712952
										10.7193	0.0736969
										10.7281	0.0760783
										10.7369	0.0784791
										10.7457	0.0809147
										10.7544	0.0832878
										10.7632	0.085552
										10.772	0.0878017
										10.7808	0.0900552
										10.7895	0.0922442
										10.7983	0.0943376
										10.8071	0.0963529
										10.8158	0.0983476
										10.8246	0.100278
										10.8334	0.102068
										10.8422	0.103737
										10.8509	0.105357
										10.8597	0.106913
										10.8685	0.108338
										10.8772	0.109667
										10.886	0.110945
										10.8948	0.112119
										10.9036	0.11315
										10.9123	0.114058
										10.9211	0.114885
										10.9299	0.115624
										10.9386	0.116242
										10.9474	0.11675
										10.9562	0.117177
										10.965	0.117503
										10.9737	0.117711
										10.9825	0.117746
										10.9913	0.117749
										11.0001	0.117662
										11.0088	0.117576
										11.0176	0.117304
										11.0264	0.116948
										11.0351	0.116513
										11.0439	0.115999
										11.0527	0.115402
										11.0615	0.114728
										11.0702	0.11398
										11.079	0.113165
										11.0878	0.112277
										11.0965	0.111308
										11.1053	0.110276
										11.1141	0.10921
										11.1229	0.108098
										11.1316	0.106922
										11.1404	0.105691
										11.1492	0.104426
										11.1579	0.103108
										11.1667	0.101732
										11.1755	0.100325
										11.1843	0.0988944
										11.193	0.0974466
										11.2018	0.0959672
										11.2106	0.0944477
										11.2194	0.0929125
										11.2281	0.0913511
										11.2369	0.0897467
										11.2457	0.0880899
										11.2544	0.0864694
										11.2632	0.0849001
										11.272	0.0832996
										11.2808	0.0816803
										11.2895	0.0800684
										11.2983	0.0784323
										11.3071	0.076759
										11.3158	0.0751198
										11.3246	0.0735467
										11.3334	0.0720003
										11.3422	0.0704342
										11.3509	0.0688647
										11.3597	0.0673318
										11.3685	0.0658347
										11.3772	0.0643306
										11.386	0.0628245
										11.3948	0.061362
										11.4036	0.0599269
										11.4123	0.0584827
										11.4211	0.0570504
										11.4299	0.0556585
										11.4387	0.0542802
										11.4474	0.0528967
										11.4562	0.0515377
										11.465	0.0502269
										11.4737	0.0489545
										11.4825	0.0476872
										11.4913	0.0464336
										11.5001	0.0452262
										11.5088	0.0440374
										11.5176	0.0428443
										11.5264	0.0416813
										11.5351	0.0405728
										11.5439	0.0394936
										11.5527	0.0384093
										11.5615	0.0373445
										11.5702	0.0363302
										11.579	0.0353342
										11.5878	0.0343419
										11.5965	0.0333775
										11.6053	0.0324541
										11.6141	0.031551
										11.6229	0.0306581
										11.6316	0.0297921
										11.6404	0.0289542
										11.6492	0.0280868
										11.658	0.0272278
										11.6667	0.0264418
										11.6755	0.0256996
										11.6843	0.0249815
										11.693	0.0242686
										11.7018	0.0235699
										11.7106	0.0229015
										11.7194	0.0222486
										11.7281	0.0215985
										11.7369	0.0209712
										11.7457	0.0203661
										11.7544	0.0197776
										11.7632	0.0192059
										11.772	0.0186456
										11.7808	0.0181015
										11.7895	0.017575
										11.7983	0.0170442
										11.8071	0.0165267
										11.8158	0.0160437
										11.8246	0.0155844
										11.8334	0.0151371
										11.8422	0.0146998
										11.8509	0.0142838
										11.8597	0.0138785
										11.8685	0.0134753
										11.8773	0.0130877
										11.886	0.0127236
										11.8948	0.0123736
										11.9036	0.0120259
										11.9123	0.0116868
										11.9211	0.0113647
										11.9299	0.0110507
										11.9387	0.0107397
										11.9474	0.0104412
										11.9562	0.0101613
										11.965	0.0098912
										11.9737	0.00962356
										11.9825	0.00936419
										11.9913	0.00911762
										12.0001	0.00887718
										12.0088	0.00863779
										12.0176	0.00840899
										12.0264	0.00819702
										12.0351	0.00799106
										12.0439	0.00778733
										12.0527	0.00759139
										12.0615	0.00740457
										12.0702	0.00722137
										12.079	0.00704113
										12.0878	0.00687051
										12.0966	0.0067105
										12.1053	0.00655621
										12.1141	0.00640405
										12.1229	0.0062568
										12.1316	0.00611761
										12.1404	0.00598075
										12.1492	0.00584438
										12.158	0.00571674
										12.1667	0.00559772
										12.1755	0.00548153
										12.1843	0.00536754
										12.193	0.00525699
										12.2018	0.00515157
										12.2106	0.0050641
										12.2194	0.00500008
										12.2281	0.00492686
										12.2369	0.00483775
										12.2457	0.00475094
										12.2544	0.00466395
										12.2632	0.00458109
										12.272	0.00450252
										12.2808	0.004425
										12.2895	0.0043478
										12.2983	0.00427444
										12.3071	0.00420767
										12.3159	0.00414202
										12.3246	0.00407492
										12.3334	0.00401044
										12.3422	0.00394918
										12.3509	0.00388805
										12.3597	0.00382694
										12.3685	0.00376957
										12.3773	0.00371619
										12.386	0.00366302
										12.3948	0.00361004
										12.4036	0.00355832
										12.4123	0.00350769
										12.4211	0.00345693
										12.4299	0.00340716
										12.4387	0.00335964
										12.4474	0.00331405
										12.4562	0.00326871
										12.465	0.00322259
										12.4737	0.00317884
										12.4825	0.0031364
										12.4913	0.00309197
										12.5001	0.00304802
										12.5088	0.00300649
										12.5176	0.00296698
										12.5264	0.00292784
										12.5352	0.00288687
										12.5439	0.00284615
										12.5527	0.00280609
										12.5615	0.00276458
										12.5702	0.00272321
										12.579	0.00268378
										12.5878	0.00264652
										12.5966	0.00260923
										12.6053	0.00257093
										12.6141	0.00253369
										12.6229	0.00249685
										12.6316	0.0024595
										12.6404	0.00242176
										12.6492	0.00238636
										12.658	0.00235208
										12.6667	0.00231678
										12.6755	0.00228181
										12.6843	0.0022481
										12.693	0.00221344
										12.7018	0.00217742
										12.7106	0.00214258
										12.7194	0.00211006
										12.7281	0.00207858
										12.7369	0.00204509
										12.7457	0.00201158
										12.7545	0.00197994
										12.7632	0.0019488
										12.772	0.00191644
										12.7808	0.00188392
										12.7895	0.00185368
										12.7983	0.00182481
										12.8071	0.00179472
										12.8159	0.00176418
										12.8246	0.00173541
										12.8334	0.00170702
										12.8422	0.00167663
										12.8509	0.00164655
										12.8597	0.00162008
										12.8685	0.00159416
										12.8773	0.00156654
										12.886	0.00153914
										12.8948	0.00151233
										12.9036	0.00148602
										12.9123	0.00145867
										12.9211	0.00143149
										12.9299	0.00140745
										12.9387	0.00138574
										12.9474	0.0013622
										12.9562	0.0013365
										12.965	0.00131279
										12.9738	0.00128983
										12.9825	0.00126566
										12.9913	0.00124158
										13.0001	0.00121965
										13.0088	0.00119899
										13.0176	0.00117777
										13.0264	0.00115569
										13.0352	0.00113512
										13.0439	0.00111464
										13.0527	0.00109285
										13.0615	0.0010717
										13.0702	0.00105191
										13.079	0.00103457
										13.0878	0.00101649
										13.0966	0.000997045
										13.1053	0.000979074
										13.1141	0.000961227
										13.1229	0.000941998
										13.1316	0.000922221
										13.1404	0.000905967
										13.1492	0.000891649
										13.158	0.000875291
										13.1667	0.000857705
										13.1755	0.000841293
										13.1843	0.000826108
										13.1931	0.000809303
										13.2018	0.000793077
										13.2106	0.000779067
										13.2194	0.000765617
										13.2281	0.000751856
										13.2369	0.000738639
										13.2457	0.00072539
										13.2545	0.000711242
										13.2632	0.000696779
										13.272	0.000682652
										13.2808	0.000671057
										13.2895	0.000660142
										13.2983	0.000647701
										13.3071	0.000634806
										13.3159	0.000622978
										13.3246	0.000610656
										13.3334	0.000597166
										13.3422	0.000585296
										13.3509	0.000575944
										13.3597	0.000566818
										13.3685	0.000555881
										13.3773	0.000545139
										13.386	0.000535542
										13.3948	0.000526513
										13.4036	0.000516229
										13.4124	0.000505293
										13.4211	0.000496502
										13.4299	0.000489134
										13.4387	0.000480991
										13.4474	0.000471796
										13.4562	0.000464289
										13.465	0.000456662
										13.4738	0.000447856
										13.4825	0.00043968
										13.4913	0.000432164
										13.5001	0.000426469
										13.5088	0.00041986
										13.5176	0.000412344
										13.5264	0.000405766
										13.5352	0.00039863
										13.5439	0.000389614
										13.5527	0.000381212
										13.5615	0.000375453
										13.5702	0.000370265
										13.579	0.000364073
										13.5878	0.000356699
										13.5966	0.000350687
										13.6053	0.000345393
										13.6141	0.000337393
										13.6229	0.000329268
										13.6317	0.000323662
										13.6404	0.000318635
										13.6492	0.000312095
										13.658	0.000304884
										13.6667	0.00029876
										13.6755	0.000291914
										13.6843	0.000285021
										13.6931	0.000278613
										13.7018	0.000273768
										13.7106	0.000270818
										13.7194	0.0002653
										13.7281	0.000259974
										13.7369	0.000255893
										13.7457	0.000250462
										13.7545	0.000243683
										13.7632	0.000237994
										13.772	0.000233677
										13.7808	0.000228716
										13.7895	0.000223652
										13.7983	0.000218104
										13.8071	0.00021362
										13.8159	0.000210097
										13.8246	0.000204447
										13.8334	0.000198714
										13.8422	0.000195549
										13.851	0.000192041
										13.8597	0.000187102
										13.8685	0.000183003
										13.8773	0.000179358
										13.886	0.000174734
										13.8948	0.000170115
										13.9036	0.000165877
										13.9124	0.000162
										13.9211	0.000159008
										13.9299	0.000155588
										13.9387	0.000150065
										13.9474	0.000144769
										13.9562	0.000140432
										13.965	0.000135121
										13.9738	0.000129663
										13.9825	0.000126635
										13.9913	0.00012354
										14.0001	0.000118415
										14.0088	0.000114087
										14.0176	0.000110625
										14.0264	0.000106201
										14.0352	0.00010105
										14.0439	9.68e-05
										14.0527	9.34e-05
										14.0615	9.11e-05
										14.0703	8.78e-05
										14.079	8.29e-05
										14.0878	7.91e-05
										14.0966	7.58e-05
										14.1053	7.05e-05
										14.1141	6.57e-05
										14.1229	6.31e-05
										14.1317	6.15e-05
										14.1404	5.83e-05
										14.1492	5.33e-05
										14.158	4.98e-05
										14.1667	4.62e-05
										14.1755	4.14e-05
										14.1843	3.68e-05
										14.1931	3.5e-05
										14.2018	3.34e-05
										14.2106	2.95e-05
										14.2194	2.64e-05
										14.2281	2.42e-05
										14.2369	1.95e-05
										14.2457	1.5e-05
										14.2545	1.13e-05
										14.2632	8.18e-06
										14.272	7.15e-06
										14.2808	3.66e-06
										14.2896	-7.05e-07
										14.2983	-3.06e-06
										14.3071	-7.08e-06
										14.3159	-1.23e-05
										14.3246	-1.6e-05
										14.3334	-1.87e-05
										14.3422	-2.09e-05
										14.351	-2.45e-05
										14.3597	-2.81e-05
										14.3685	-3.09e-05
										14.3773	-3.44e-05
										14.386	-3.88e-05
										14.3948	-4.3e-05
										14.4036	-4.45e-05
										14.4124	-4.69e-05
										14.4211	-5.1e-05
										14.4299	-5.35e-05
										14.4387	-5.57e-05
										14.4474	-5.84e-05
										14.4562	-6.23e-05
										14.465	-6.59e-05
										14.4738	-6.7e-05
										14.4825	-6.76e-05
										14.4913	-7.07e-05
										14.5001	-7.29e-05
										14.5089	-7.33e-05
										14.5176	-7.55e-05
										14.5264	-7.85e-05
										14.5352	-8.08e-05
										14.5439	-8.23e-05
										14.5527	-8.33e-05
										14.5615	-8.56e-05
										14.5703	-8.79e-05
										14.579	-8.93e-05
										14.5878	-9.21e-05
										14.5966	-9.51e-05
										14.6053	-9.71e-05
										14.6141	-9.75e-05
										14.6229	-9.79e-05
										14.6317	-9.84e-05
										14.6404	-0.00010019
										14.6492	-0.000101427
										14.658	-0.000103208
										14.6667	-0.000104286
										14.6755	-0.000106075
										14.6843	-0.000106735
										14.6931	-0.000107271
										14.7018	-0.000107807
										14.7106	-0.000109581
										14.7194	-0.000110138
										14.7282	-0.000110694
										14.7369	-0.000113026
										14.7457	-0.000113886
										14.7545	-0.000113741
										14.7632	-0.000113826
										14.772	-0.00011408
										14.7808	-0.000114334
										14.7896	-0.000115058
										14.7983	-0.000116204
										14.8071	-0.00011746
										14.8159	-0.000118302
										14.8246	-0.000116962
										14.8334	-0.000116568
										14.8422	-0.000116659
										14.851	-0.00011675
										14.8597	-0.000116632
										14.8685	-0.000116753
										14.8773	-0.000117025
										14.886	-0.000117297
										14.8948	-0.000115978
										14.9036	-0.000115798
										14.9124	-0.000115897
										14.9211	-0.000115996
										14.9299	-0.000116487
										14.9387	-0.000116978
										14.9475	-0.000117971
										14.9562	-0.000118968
										14.965	-0.000118121
										14.9738	-0.000118356
										14.9825	-0.000118591
										14.9913	-0.000118973
										15.0001	-0.000119244
										15.0089	-0.000119514
										15.0176	-0.0001213
										15.0264	-0.000123096
										15.0352	-0.000122927
										15.0439	-0.000122965
										15.0527	-0.000123684
										15.0615	-0.000124403
										15.0703	-0.000124575
										15.079	-0.000124746
										15.0878	-0.000127412
										15.0966	-0.000128681
										15.1053	-0.000127317
										15.1141	-0.000127292
										15.1229	-0.000127466
										15.1317	-0.00012764
										15.1404	-0.000127858
										15.1492	-0.000128964
										15.158	-0.000130161
										15.1668	-0.000129427
										15.1755	-0.000127066
										15.1843	-0.000126727
										15.1931	-0.000126389
										15.2018	-0.000124734
										15.2106	-0.000122767
										15.2194	-0.000122424
										15.2282	-0.000122376
										15.2369	-0.000122376
										15.2457	-0.000120974
										15.2545	-0.000119107
										15.2632	-0.000119141
										15.272	-0.000118985
										15.2808	-0.000118798
										15.2896	-0.00011883
										15.2983	-0.000118861
										15.3071	-0.00011801
										15.3159	-0.000116841
										15.3246	-0.000115161
										15.3334	-0.00011504
										15.3422	-0.000114918
										15.351	-0.000115384
										15.3597	-0.00011585
										15.3685	-0.000116707
										15.3773	-0.000117463
										15.3861	-0.00011719
										15.3948	-0.000117518
										15.4036	-0.000117846
										15.4124	-0.000119169
										15.4211	-0.000119743
										15.4299	-0.000120974
										15.4387	-0.000123019
										15.4475	-0.000124831
										15.4562	-0.000125183
										15.465	-0.000125534
										15.4738	-0.000126088
										15.4825	-0.000128938
										15.4913	-0.000130254
										15.5001	-0.00013219
										15.5089	-0.000135521
										15.5176	-0.000136996
										15.5264	-0.000137339
										15.5352	-0.000138386
										15.5439	-0.000139559
										15.5527	-0.000140826
										15.5615	-0.000142352
										15.5703	-0.000144569
										15.579	-0.000147322
										15.5878	-0.000149133
										15.5966	-0.000149355
										15.6054	-0.000150579
										15.6141	-0.000153326
										15.6229	-0.000155187
										15.6317	-0.000156695
										15.6404	-0.000159609
										15.6492	-0.00016274
										15.658	-0.000164776
										15.6668	-0.000166331
										15.6755	-0.000167723
										15.6843	-0.000169788
										15.6931	-0.000172025
										15.7018	-0.000173998
										15.7106	-0.000176934
										15.7194	-0.000180673
										15.7282	-0.000182669
										15.7369	-0.00018334
										15.7457	-0.000184865
										15.7545	-0.000187378
										15.7632	-0.000190347
										15.772	-0.000192818
										15.7808	-0.000196171
										15.7896	-0.000199957
										15.7983	-0.000202337
										15.8071	-0.000203096
										15.8159	-0.000203922
										15.8247	-0.000205667
										15.8334	-0.000207249
										15.8422	-0.00020882
										15.851	-0.000210854
										15.8597	-0.000213691
										15.8685	-0.000214944
										15.8773	-0.00021514
										15.8861	-0.000215337
										15.8948	-0.00021715
										15.9036	-0.000218264
										15.9124	-0.000218641
										15.9211	-0.000220199
										15.9299	-0.000223109
										15.9387	-0.000224645
										15.9475	-0.000224712
										15.9562	-0.00022526
										15.965	-0.000225807
										15.9738	-0.000226344
										15.9825	-0.000226882
										15.9913	-0.00022742
										16.0001	-0.000229173
										16.0089	-0.000229376
										16.0176	-0.000228352
										16.0264	-0.000228354
										16.0352	-0.000228517
										16.044	-0.000228681
										16.0527	-0.000228502
										16.0615	-0.000228521
										16.0703	-0.00022854
										16.079	-0.000228604
										16.0878	-0.000227097
										16.0966	-0.000226462
										16.1054	-0.000226416
										16.1141	-0.00022604
										16.1229	-0.000226354
										16.1317	-0.000226668
										16.1404	-0.000227239
										16.1492	-0.00022787
										16.158	-0.000226903
										16.1668	-0.000226789
										16.1755	-0.000226674
										16.1843	-0.000226642
										16.1931	-0.000226739
										16.2018	-0.000227208
										16.2106	-0.000227677
										16.2194	-0.000227357
										16.2282	-0.000225553
										16.2369	-0.000225225
										16.2457	-0.000224897
										16.2545	-0.000224916
										16.2633	-0.00022515
										16.272	-0.000225385
										16.2808	-0.000225751
										16.2896	-0.000223865
										16.2983	-0.00022179
										16.3071	-0.000220107
										16.3159	-0.000218645
										16.3247	-0.000217795
										16.3334	-0.000217452
										16.3422	-0.000217393
										16.351	-0.000217335
										16.3597	-0.000216976
										16.3685	-0.00021398
										16.3773	-0.00021154
										16.3861	-0.000210823
										16.3948	-0.000209267
										16.4036	-0.000208786
										16.4124	-0.000208306
										16.4211	-0.000208184
										16.4299	-0.000206573
										16.4387	-0.00020424
										16.4475	-0.000202459
										16.4562	-0.000201962
										16.465	-0.000201195
										16.4738	-0.000201363
										16.4826	-0.000201531
										16.4913	-0.000201777
										16.5001	-0.000200563
										16.5089	-0.000197613
										16.5176	-0.000197181
										16.5264	-0.000196749
										16.5352	-0.000196034
										16.544	-0.000196391
										16.5527	-0.000196747
										16.5615	-0.000197475
										16.5703	-0.000197441
										16.579	-0.000197208
										16.5878	-0.000197491
										16.5966	-0.000197774
										16.6054	-0.000198751
										16.6141	-0.000199851
										16.6229	-0.000200951
										16.6317	-0.000203097
										16.6404	-0.000204256
										16.6492	-0.0002045
										16.658	-0.000204744
										16.6668	-0.000205686
										16.6755	-0.000206812
										16.6843	-0.000207829
										16.6931	-0.000210395
										16.7019	-0.000213515
										16.7106	-0.000215238
										16.7194	-0.000215697
										16.7282	-0.000216155
										16.7369	-0.000217159
										16.7457	-0.000217914
										16.7545	-0.000218917
										16.7633	-0.000221637
										16.772	-0.00022366
										16.7808	-0.000224517
										16.7896	-0.000224355
										16.7983	-0.000224489
										16.8071	-0.000224648
										16.8159	-0.000224808
										16.8247	-0.000225497
										16.8334	-0.000227458
										16.8422	-0.000229789
										16.851	-0.000230516
										16.8597	-0.000231013
										16.8685	-0.000231509
										16.8773	-0.00023255
										16.8861	-0.00023398
										16.8948	-0.000234776
										16.9036	-0.000235573
										16.9124	-0.000238145
										16.9212	-0.000239398
										16.9299	-0.000239514
										16.9387	-0.000239958
										16.9475	-0.000240403
										16.9562	-0.000241312
										16.965	-0.000242356
										16.9738	-0.000244334
										16.9826	-0.000245588
										16.9913	-0.00024615
										17.0001	-0.00024597
										17.0089	-0.000246141
										17.0176	-0.000246312
										17.0264	-0.000247725
										17.0352	-0.0002475
										17.044	-0.000247679
										17.0527	-0.000247858
										17.0615	-0.000246998
										17.0703	-0.000244929
										17.079	-0.000243001
										17.0878	-0.000241486
										17.0966	-0.000239297
										17.1054	-0.000237201
										17.1141	-0.000236338
										17.1229	-0.000235465
										17.1317	-0.000232107
										17.1405	-0.000227413
										17.1492	-0.000224669
										17.158	-0.000222446
										17.1668	-0.00021839
										17.1755	-0.000215318
										17.1843	-0.000213384
										17.1931	-0.000210045
										17.2019	-0.000206111
										17.2106	-0.000201667
[truncated: 884 more rows]
