# Supplementary material for: LC8 enhances 53BP1 foci through heterogeneous bridging of 53BP1 oligomers
Source: eLife. 2025 Apr 29;14:e102179. doi: 10.7554/eLife.102179 (PMC12187134; doi:10.7554/eLife.102179)
Supplement: Figure 2—source data 1. [file elife-102179-fig2-data1.xlsx]

## Sheet: R1, R2, HetNOE
Residue	LBD R1	StDev LBD R1		LBD-OD R1	StDev LBD-OD R1		Residue	LBD R2	StDev LBD R2		LBD-OD R2	StDev LBD-OD R2		Residue	LBD 1H-15N HetNOE	Error		LBD-OD 1H-15N HetNOE	Error
1140							1140
1141	1.601	0.005		1.189	0.024		1141	4.51	0.05		3.85	0.05		1141	0.387149	0.004		0.432368	0.08
1142	1.5872	0.0048		1.532	0.026		1142	6.004	0.045		4.18	0.043		1142	0.130778	0.003		0.176767	0.023
1143	1.5455	0.0038		1.415	0.027		1143	3.361	0.031		4.348	0.049		1143	0.275754	0.003		0.313131	0.024
1144	1.5491	0.0037		1.462	0.025		1144	4.041	0.043		2.494	0.034		1144	0.328767	0.003		0.350627	0.013
1145	1.6151	0.005		1.487	0.026		1145	6.19	0.06		5.66	0.06		1145	0.338826	0.004		0.344351	0.026
1146	1.6275	0.0038		1.498	0.026		1146	4.221	0.039					1146	0.255547	0.003		0.276827	0.013
1147							1147							1147
1148	1.602	0.007		1.453	0.025		1148	4.811	0.049					1148	0.272041	0.004		0.295022	0.023
1149	1.579	0.004		1.427	0.024		1149	4.161	0.04					1149	0.226618	0.003		0.252237	0.014
1150	1.577	0.009		1.384	0.023		1150	4.8	0.06					1150	0.320098	0.005		0.327652	0.026
1151	1.6244	0.0047		1.409	0.021		1151	4.521	0.036					1151	0.377528	0.003		0.352775	0.013
1152	1.6141	0.0046		1.218	0.025		1152	4.743	0.046					1152	0.331906	0.003		0.251751	0.189
1153	1.593	0.006		1.477	0.028		1153	4.118	0.045		4.33	0.05		1153	0.334974	0.004		0.325605	0.021
1154	1.544	0.005		1.445	0.026		1154	3.738	0.043		4.61	0.05		1154	0.3317	0.004		0.30962	0.02
1155	1.5677	0.0038		1.465	0.026		1155	6.45	0.06					1155	0.190209	0.004		0.240539	0.015
1156							1156				4.324	0.049		1156
1157	1.6099	0.0032		1.509	0.026		1157	4.259	0.028		4.302	0.041		1157	0.273612	0.002		0.275283	0.011
1158	1.609	0.005		1.463	0.027		1158	4.634	0.046		4.82	0.06		1158	0.255809	0.004		0.294554	0.02
1159	1.596	0.006		1.421	0.023		1159	5.33	0.06		4.98	0.05		1159	0.369977	0.004		0.341339	0.022
1160	1.612	0.007		1.41	0.024		1160	5.41	0.08		5.17	0.05		1160	0.283913	0.005		0.324124	0.024
1161	1.599	0.006		1.523	0.027		1161	4.38	0.06		4.81	0.06		1161	0.27491	0.004		0.294731	0.024
1162	1.512	0.032		1.33	0.027		1162	4.2	0.8					1162	0.163472	0.017		1.36023	0.921
1163	1.512	0.005		1.428	0.022		1163	5.2	0.06		4.66	0.05		1163	0.240484	0.004		0.263713	0.021
1164							1164							1164
1165	1.5068	0.0046		1.436	0.027		1165	4.299	0.05					1165	0.30746	0.003		0.287163	0.018
1166	1.5442	0.0028		1.423	0.027		1166	4.763	0.029		4.51	0.05		1166	0.246441	0.002		0.257143	0.011
1167	1.4636	0.0043		1.413	0.021		1167	4.557	0.048		4.29	0.06		1167	0.1754	0.003		0.180403	0.02
1168	1.498	0.005		1.373	0.025		1168	4.62	0.06		4.55	0.05		1168	0.218058	0.003		0.254208	0.019
1169	1.523	0.006		1.389	0.025		1169	5.63	0.07		5.34	0.06		1169	0.24316	0.003		0.196554	0.018
1170	1.4758	0.0045		1.357	0.023		1170	4.153	0.043		3.834	0.044		1170	0.14174	0.003		0.170808	0.016
1171	1.5627	0.0045		1.418	0.026		1171	4.128	0.037		3.839	0.044		1171	0.245943	0.003		0.256683	0.014
1172	1.537	0.005		1.423	0.024		1172	4.4	0.05		4.128	0.046		1172	0.207278	0.003		0.222797	0.018
1173	1.524	0.006		1.342	0.024		1173	4.9	0.06					1173	0.182861	0.004		0.19541	0.018
1174	1.5355	0.0049		1.444	0.026		1174	5.99	0.06		4.33	0.05		1174	0.239649	0.003		0.257885	0.018
1175	1.6031	0.005		1.526	0.029		1175	6.13	0.07		6.72	0.07		1175	0.350498	0.003		0.339827	0.018
1176	1.605	0.007		1.456	0.025		1176	4.96	0.07		4.49	0.05		1176	0.256346	0.004		0.269225	0.019
1177	1.5078	0.0046		1.401	0.022		1177	4.212	0.045		4.239	0.044		1177	0.27925	0.003		0.257184	0.015
1178	1.6252	0.005		1.364	0.022		1178	4.417	0.033					1178	0.33312	0.003		0.279481	0.015
1179							1179							1179
1180	1.5348	0.0046		1.376	0.023		1180	3.311	0.038					1180	0.352712	0.003		0.313105	0.015
1181	1.5342	0.0047		1.427	0.024		1181	4.73	0.05		3.717	0.047		1181	0.229727	0.003		0.251808	0.015
1182	1.453	0.005		1.331	0.022		1182	4.35	0.06		3.311	0.042		1182	0.138016	0.004		0.156496	0.017
1183	1.56	0.005		1.418	0.027		1183	4.564	0.049		3.708	0.045		1183	0.258722	0.003		0.270647	0.014
1184	1.604	0.005		1.423	0.024		1184	4.64	0.06		3.586	0.043		1184	0.217486	0.003		0.223599	0.014
1185	1.511	0.005		1.321	0.023		1185	3.375	0.037		4.263	0.049		1185	0.188896	0.004		0.266951	0.026
1186	1.5962	0.0039		1.541	0.023		1186	5.314	0.049		4.46	0.05		1186	0.369069	0.003		0.358646	0.014
1187	1.613	0.0046		1.502	0.024		1187	4.286	0.045		4.394	0.049		1187	0.432013	0.003		0.422421	0.014
1188	1.691	0.006		1.542	0.026		1188	4.85	0.06		5.02	0.06		1188	0.442464	0.004		0.466461	0.016
1189	1.6226	0.0049		1.508	0.03		1189	4.148	0.038		4.99	0.05		1189	0.329694	0.003		0.359112	0.013
1190	1.663	0.005		1.548	0.026		1190	4.181	0.046		5.02	0.05		1190	0.38423	0.003		0.402709	0.016
1191	1.518	0.006		1.464	0.022		1191	4.026	0.045		4.526	0.048		1191	0.18696	0.004		0.331706	0.013
1192							1192				3.955	0.05		1192
1193	1.5659	0.0036		1.434	0.025		1193	3.999	0.034		3.841	0.047		1193	0.361667	0.003		0.375393	0.013
1194	1.4876	0.0044		1.393	0.02		1194	6.3	0.05		3.886	0.044		1194	0.349107	0.003		0.355602	0.013
1195	1.5347	0.0039		1.429	0.026		1195	4.183	0.044		4.042	0.049		1195	0.225435	0.003		0.268419	0.013
1196	1.5283	0.0042		1.459	0.027		1196	4.14	0.05		4.35	0.05		1196	0.26976	0.003		0.278247	0.014
1197	1.5677	0.004		1.286	0.023		1197	6.45	0.06		4.317	0.049		1197	0.184933	0.003		0.104472	0.06
1198	1.5312	0.0047		1.428	0.022		1198	4.54	0.05		4.016	0.049		1198	0.254141	0.003		0.273885	0.014
1199							1199				4.439	0.048		1199
1200							1200							1200
1201	1.597	0.006		1.456	0.024		1201	4.57	0.05		4.264	0.045		1201	0.205717	0.003		0.226291	0.015
1202	1.539	0.005		1.357	0.024		1202	4.585	0.046		3.405	0.047		1202	0.3426	0.003		0.320992	0.046
1203	1.563	0.006		1.421	0.023		1203	4.187	0.045		4.336	0.048		1203	0.184276	0.003		0.214549	0.014
1204	1.5498	0.004		1.443	0.028		1204	3.873	0.037		4.092	0.047		1204	0.368696	0.003		0.352256	0.013
1205	1.4818	0.0035		1.408	0.026		1205	5.271	0.045		4.144	0.047		1205	0.305051	0.003		0.269318	0.014
1206							1206							1206
1207	1.5058	0.003		1.408	0.024		1207	3.617	0.03		3.92	0.05		1207	0.275746	0.002		0.275679	0.011
1208	1.4745	0.0045		1.354	0.022		1208	3.957	0.048		4.67	0.05		1208	0.277255	0.003		0.23428	0.016
1209	1.412	0.004		1.29	0.023		1209	3.925	0.041		4.77	0.05		1209	0.188541	0.003		0.195413	0.015
1210							1210							1210
1211	1.4291	0.0046		1.281	0.023		1211	4.74	0.05		5.14	0.05		1211	0.104557	0.003		0.122897	0.017
1212	1.5412	0.0045		1.375	0.023		1212	3.521	0.038		4.79	0.06		1212	0.390351	0.003		0.378926	0.014
1213							1213				4.517	0.048		1213
1214	1.5829	0.0047		1.382	0.022		1214	3.882	0.044		4.95	0.05		1214	0.402604	0.004		0.345012	0.016
1215	1.6375	0.0038		1.504	0.028		1215	3.997	0.024		4.49	0.05		1215	0.405473	0.002		0.411601	0.012
1216	1.5957	0.0048		1.393	0.024		1216	4.097	0.043		5.38	0.06		1216	0.36165	0.004		0.325207	0.017
1217				1.46	0.026		1217				5.66	0.06		1217				0.40039	0.024
1218							1218				5.05	0.06		1218				0.365544	0.019
1219	1.654	0.009		1.266	0.023		1219	4.52	0.05		6.27	0.07		1219	0.296734	0.005
1220	1.6005	0.0049		1.374	0.023		1220	3.499	0.036		5.97	0.06		1220	0.220867	0.003		0.320899	0.024
1221	1.546	0.005		1.324	0.024		1221	3.229	0.034		5.99	0.06		1221	0.126216	0.003		0.348817	0.022
1222	1.5661	0.0044		1.351	0.025		1222	2.716	0.027		7.24	0.08		1222	0.0964996	0.003		0.20135	0.023
1223	1.5082	0.0032		1.333	0.023		1223	2.404	0.025		7.55	0.08		1223	0.0455068	0.002		0.319481	0.026
1224	1.4365	0.0031		1.301	0.023		1224	1.984	0.024					1224	-0.197697	0.003		0.229844	0.03
1225	1.2093	0.0033					1225	3.929	0.034					1225	-0.461092	0.004		0.2978	0.039
														1225	0.517	0.006

## Sheet: Peak ratio in 4 equivalents LC8
LBD	Residue	Ratio	LBD-OD	Residue
		0.169622			0.126491
	1142	1.29758		1142	1
	1143	0.844268		1143	0.671784
	1144	0.055415		1144	0.0475034
	1145	0.242967		1145	0.203143
	1146	0.19475		1146	0.157346
	1147	0		1147	0
	1148	-0.0180596		1148	-0.0441353
	1149	0.0509624		1149	-0.0212449
	1150	0.0321222		1150	0.068557
	1151	0		1151	0.100253
	1152	-0.0232867		1152	-0.104672
	1153	0.0141087		1153	-0.034553
	1154	-0.0195255		1154	-0.0240548
	1155	-0.0129375		1155	-0.0137319
	1156	0		1156	0
	1157	0.0201757		1157	0.0678918
	1158	0.0667806		1158	0.388818
	1159	0.0179986		1159	0.0692902
	1160	-0.00402664		1160	0.141153
	1161	0.0258718		1161	0.0511556
	1162	0.236637		1162	0
	1163	0.0299132		1163	0.0285873
	1164	0		1164	0
	1165	-0.00625008		1165	-0.0310974
	1166	0.0230459		1166	0.0439388
	1167	-0.0209719		1167	0.0825022
	1168	-0.0168954		1168	-0.0569778
	1169	0.0467644		1169	-0.0497697
	1170	-0.00520077		1170	0.0424758
	1171	-0.0151533		1171	-0.0285108
	1172	0.137029		1172	-0.0604648
	1173	0.0437742		1173	0.0610532
	1174	0.0178336		1174	0.0167086
	1175	0.0400649		1175	-0.0254315
	1176	-0.0424515		1176	-0.064082
	1177	0.0241082		1177	-0.0491971
	1178	0.371321		1178	0
	1179	0		1179	0
	1180	0		1180	0.392394
	1181	0.0331488		1181	0.0535317
	1182	0.0183234		1182	0.0143626
	1183	0.0253595		1183	0.0176259
	1184	-0.010369		1184	0.0311725
	1185	0.376356		1185	0.486646
	1186	0.0315527		1186	-0.0147715
	1187	0.0518472		1187	-0.0488396
	1188	-0.0139221		1188	0.0517337
	1189	-0.0162576		1189	-0.0504254
	1190	-0.0127829		1190	0.043763
	1191	-0.0132047		1191	-0.0643124
	1192	0		1192	0
	1193	0.0189566		1193	-0.0285265
	1194	0.0146525		1194	-0.01098
	1195	-0.0073528		1195	0.0205389
	1196	0.0139149		1196	0.0292565
	1197	-0.0104064		1197	0.249088
	1198	0.117745		1198	0.0408981
	1199	0		1199	0
	1200	0		1200	0
	1201	0.117944		1201	0.074172
	1202	0.0103439		1202	-0.0419857
	1203	0.0224173		1203	0.0204268
	1204	0.0801441		1204	0.092715
	1205	0.284313		1205	0.281914
	1206	0		1206	0
	1207	0.193263		1207	0.0242854
	1208	0.250141		1208	0.0245646
	1209	0.3765		1209	-0.0453896
	1210	0		1210	0
	1211	0.593355		1211	0.196691
	1212	0.461702		1212	0.0259493
	1213	0.929704		1213	0
	1214	0		1214	0.307851
	1215	0.509677		1215	0.137201
	1216	0.776803		1216	0.26726
	1217	0		1217	0.128749
	1218	0		1218	0
	1219	0.552985		1219	0.188471
	1220	0.74731		1220	0.150953
	1221	0.883166		1221	0.210031
	1222	1.05882		1222	0.260525
	1223	1		1223	0.122675
	1224	0.933679		1224	0.108361
	1225	0.259352		1225	0

## Sheet: Titration oF LBD-OD with LC8
0.25 equivalent LC8	Residue	Ratio	normalized	0.5 equivalent LC8	Residue	Ratio	normalized	1 equivalent LC8	Residue	Ratio	normalized	2 equivalent LC8	Residue	Ratio	normalized	0.5 equivalent LC8	Residue	Ratio	normalized	4 equivalent LC8	Residue	Ratio	normalized
	1141	0.849629	0.915449			0.6634	0.786658			0.435116	0.600319			0.181913	0.29761			0.0694557	0.167609			0.0591433	0.126491
	1142	0.928079	0.999977		1142	0.843314	1		1142	0.724808	1		1142	0.611247	1		1142	0.414391	1		1142	0.46757	1
	1143	0.909729	0.980205		1143	0.756729	0.897327		1143	0.654526	0.903034		1143	0.46415	0.759349		1143	0.290109	0.700085		1143	0.314106	0.671784
	1144	0.818646	0.882066		1144	0.62425	0.740234		1144	0.424161	0.585205		1144	0.17093	0.279642		1144	-0.00820413	-0.0197981		1144	0.0222112	0.0475034
	1145	0.821286	0.884911		1145	0.692151	0.820751		1145	0.489428	0.675253		1145	0.208635	0.341327		1145	0.0971343	0.234403		1145	0.0949835	0.203143
	1146	0.850336	0.916212		1146	0.718255	0.851706		1146	0.502972	0.693939		1146	0.242671	0.397009		1146	0.0787098	0.189941		1146	0.0735703	0.157346
	1147		0		1147		0		1147		0		1147		0		1147		0		1147		0
	1148	0.802443	0.864609		1148	0.620152	0.735374		1148	0.367897	0.507578		1148	0.107554	0.175959		1148	0.0480278	0.1159		1148	-0.0206363	-0.0441353
	1149	0.839851	0.904915		1149	0.657351	0.779485		1149	0.440521	0.607777		1149	0.172033	0.281446		1149	0.0205039	0.0494797		1149	-0.00993349	-0.0212449
	1150	0.829496	0.893757		1150	0.667994	0.792105		1150	0.400878	0.553081		1150	0.137736	0.225336		1150	0.0247756	0.059788		1150	0.0320552	0.068557
	1151	0.860284	0.926931		1151	0.690539	0.81884		1151	0.50404	0.695412		1151	0.221535	0.362432		1151	0.0596276	0.143892		1151	0.0468751	0.100253
	1152	0.690301	0.743779		1152	0.597188	0.708144		1152	0.432934	0.597308		1152	0.201236	0.329222		1152	0.146537	0.353621		1152	-0.0489413	-0.104672
	1153	0.838249	0.903189		1153	0.667835	0.791917		1153	0.392846	0.542001		1153	0.11088	0.181399		1153	0.0161417	0.0389528		1153	-0.0161559	-0.034553
	1154	0.81439	0.87748		1154	0.666991	0.790917		1154	0.402893	0.555862		1154	0.100535	0.164476		1154	0.0274815	0.0663179		1154	-0.0112473	-0.0240548
	1155	0.810346	0.873123		1155	0.663376	0.78663		1155	0.450617	0.621706		1155	0.175762	0.287546		1155	0.0174716	0.0421622		1155	-0.00642062	-0.0137319
	1156		0		1156		0		1156		0		1156		0		1156		0		1156		0
	1157	0.821536	0.885181		1157	0.669712	0.794143		1157	0.466211	0.64322		1157	0.18795	0.307486		1157	-0.00632194	-0.015256		1157	0.0317442	0.0678918
	1158	0.831897	0.896344		1158	0.65182	0.772927		1158	0.413145	0.570006		1158	0.367428	0.601112		1158	0.236702	0.571206		1158	0.1818	0.388818
	1159	0.811771	0.874659		1159	0.64223	0.761555		1159	0.428393	0.591043		1159	0.155594	0.254552		1159	0.0368484	0.088922		1159	0.032398	0.0692902
	1160	0.796555	0.858264		1160	0.615452	0.729801		1160	0.383074	0.528518		1160	0.111521	0.182449		1160	-0.00943874	-0.0227774		1160	0.065999	0.141153
	1161	0.746383	0.804205		1161	0.595129	0.705703		1161	0.352104	0.48579		1161	0.0805916	0.131848		1161	-0.0145458	-0.0351017		1161	0.0239188	0.0511556
	1162		0		1162		0		1162		0		1162		0		1162		0		1162		0
	1163	0.794138	0.85566		1163	0.606576	0.719277		1163	0.359088	0.495426		1163	0.0682854	0.111715		1163	-0.0172732	-0.0416835		1163	0.0133665	0.0285873
	1164		0		1164		0		1164		0		1164		0		1164		0		1164		0
	1165	0.79872	0.860596		1165	0.604779	0.717146		1165	0.374017	0.516023		1165	0.0874957	0.143143		1165	0.0246501	0.0594852		1165	-0.0145402	-0.0310974
	1166	0.810902	0.873723		1166	0.627799	0.744442		1166	0.378352	0.522004		1166	0.120003	0.196325		1166	-0.00558886	-0.0134869		1166	0.0205445	0.0439388
	1167	0.778765	0.839096		1167	0.611064	0.724598		1167	0.368825	0.508859		1167	0.0781156	0.127797		1167	-0.0151895	-0.0366549		1167	0.0385756	0.0825022
	1168	0.807905	0.870493		1168	0.607484	0.720354		1168	0.358881	0.49514		1168	0.0929675	0.152095		1168	-0.0179332	-0.0432761		1168	-0.0266411	-0.0569778
	1169	0.815554	0.878735		1169	0.639613	0.758452		1169	0.394121	0.54376		1169	0.109089	0.17847		1169	0.021279	0.0513501		1169	-0.0232708	-0.0497697
	1170	0.763585	0.82274		1170	0.581374	0.689392		1170	0.380192	0.524541		1170	0.0794319	0.129951		1170	0.0238071	0.0574508		1170	0.0198604	0.0424758
	1171	0.811583	0.874457		1171	0.67537	0.800852		1171	0.454667	0.627294		1171	0.194999	0.319018		1171	0.0124473	0.0300376		1171	-0.0133308	-0.0285108
	1172	0.817665	0.88101		1172	0.61861	0.733547		1172	0.398298	0.549522		1172	0.237608	0.388726		1172	0.121184	0.292439		1172	-0.0282715	-0.0604648
	1173	0.783193	0.843867		1173	0.58543	0.694201		1173	0.353574	0.487818		1173	0.0881373	0.144193		1173	0.0248617	0.0599959		1173	0.0285467	0.0610532
	1174	0.783232	0.843909		1174	0.587489	0.696644		1174	0.358927	0.495204		1174	0.0716043	0.117145		1174	0.00859246	0.0207352		1174	0.00781245	0.0167086
	1175	0.780071	0.840503		1175	0.615946	0.730388		1175	0.360325	0.497132		1175	0.10256	0.167789		1175	-0.0116764	-0.0281772		1175	-0.011891	-0.0254315
	1176	0.805365	0.867757		1176	0.602778	0.714772		1176	0.365942	0.504881		1176	0.115819	0.18948		1176	-0.0198042	-0.0477911		1176	-0.0299628	-0.064082
	1177	0.803449	0.865692		1177	0.641378	0.760545		1177	0.435382	0.600687		1177	0.175486	0.287094		1177	0.0223689	0.0539803		1177	-0.0230031	-0.0491971
	1178		0		1178		0		1178		0		1178		0		1178		0		1178		0
	1179		0		1179		0		1179		0		1179		0		1179		0		1179		0
	1180	0.899845	0.969556		1180	0.777708	0.922204		1180	0.646954	0.892588		1180	0.444488	0.727182		1180	0.194559	0.469506		1180	0.183472	0.392394
	1181	0.82137	0.885002		1181	0.682149	0.808891		1181	0.457004	0.630517		1181	0.181172	0.296397		1181	0.0123331	0.0297621		1181	0.0250298	0.0535317
	1182	0.775795	0.835896		1182	0.610096	0.723451		1182	0.369302	0.509517		1182	0.0975264	0.159553		1182	0.0145805	0.0351854		1182	0.00671552	0.0143626
	1183	0.843141	0.908459		1183	0.683451	0.810435		1183	0.45932	0.633713		1183	0.211904	0.346675		1183	0.0182154	0.043957		1183	0.00824132	0.0176259
	1184	0.811974	0.874878		1184	0.656143	0.778053		1184	0.452271	0.623988		1184	0.18785	0.307322		1184	0.0249248	0.060148		1184	0.0145753	0.0311725
	1185	0.847957	0.913648		1185	0.728775	0.86418		1185	0.492165	0.679028		1185	0.421704	0.689907		1185	0.257954	0.62249		1185	0.227541	0.486646
	1186	0.787558	0.84857		1186	0.632541	0.750066		1186	0.416688	0.574895		1186	0.17805	0.29129		1186	0.00980543	0.0236623		1186	-0.00690672	-0.0147715
	1187	0.781899	0.842472		1187	0.6287	0.74551		1187	0.41963	0.578953		1187	0.151234	0.247419		1187	0.0303368	0.0732081		1187	-0.0228359	-0.0488396
	1188	0.826883	0.890941		1188	0.678419	0.804468		1188	0.484486	0.668434		1188	0.177271	0.290015		1188	0.00792242	0.0191182		1188	0.0241891	0.0517337
	1189	0.823563	0.887365		1189	0.646095	0.766138		1189	0.436876	0.602747		1189	0.18789	0.307388		1189	0.0142711	0.0344387		1189	-0.0235774	-0.0504254
	1190	0.811891	0.874788		1190	0.651316	0.772329		1190	0.445757	0.615		1190	0.162323	0.265561		1190	-0.00895091	-0.0216002		1190	0.0204623	0.043763
	1191	0.808945	0.871614		1191	0.622428	0.738073		1191	0.424666	0.585902		1191	0.186648	0.305356		1191	-0.0337478	-0.0814396		1191	-0.0300705	-0.0643124
	1192		0		1192		0		1192		0		1192		0		1192		0		1192		0
	1193	0.83996	0.905032		1193	0.669199	0.793535		1193	0.482868	0.666201		1193	0.208143	0.340523		1193	0.0100028	0.0241387		1193	-0.0133381	-0.0285265
	1194	0.828161	0.892319		1194	0.684696	0.811911		1194	0.474432	0.654563		1194	0.194038	0.317445		1194	0.0111589	0.0269283		1194	-0.0051339	-0.01098
	1195	0.836068	0.900838		1195	0.660798	0.783573		1195	0.478374	0.660002		1195	0.193293	0.316227		1195	-0.00945364	-0.0228134		1195	0.00960336	0.0205389
	1196	0.815048	0.87819		1196	0.642707	0.76212		1196	0.419613	0.578931		1196	0.18501	0.302676		1196	-0.0147337	-0.035555		1196	0.0136795	0.0292565
	1197	0.938147	1.01082		1197	0.945945	1.1217		1197	0.700397	0.966321		1197	0.465232	0.761119		1197	0.164153	0.396131		1197	0.116466	0.249088
	1198	0.84669	0.912283		1198	0.683339	0.810302		1198	0.482003	0.665008		1198	0.215149	0.351983		1198	0.00997122	0.0240624		1198	0.0191227	0.0408981
	1199		0		1199		0		1199		0		1199		0		1199		0		1199		0
	1200		0		1200		0		1200		0		1200		0		1200		0		1200		0
	1201	0.887652	0.956419		1201	0.766078	0.908414		1201	0.564877	0.779348		1201	0.276898	0.453005		1201	0.0436443	0.105322		1201	0.0346806	0.074172
	1202	0.847808	0.913488		1202	0.740959	0.878627		1202	0.568898	0.784895		1202	0.273269	0.447067		1202	0.0566604	0.136732		1202	-0.0196313	-0.0419857
	1203	0.853738	0.919877		1203	0.750433	0.889862		1203	0.567649	0.783172		1203	0.280364	0.458676		1203	0.0253135	0.0610861		1203	0.00955096	0.0204268
	1204	0.873391	0.941053		1204	0.756738	0.897338		1204	0.569182	0.785287		1204	0.281496	0.460527		1204	0.0463863	0.111939		1204	0.0433508	0.092715
	1205	0.829101	0.893332		1205	0.695921	0.825222		1205	0.524541	0.723696		1205	0.384317	0.628743		1205	0.185435	0.447489		1205	0.131814	0.281914
	1206		0		1206		0		1206		0		1206		0		1206		0		1206		0
	1207	0.848356	0.914079		1207	0.718445	0.851931		1207	0.501475	0.691873		1207	0.211915	0.346692		1207	0.0260519	0.062868		1207	0.0113551	0.0242854
	1208	0.835557	0.900288		1208	0.68332	0.810279		1208	0.519804	0.717161		1208	0.229893	0.376105		1208	0.0431774	0.104195		1208	0.0114857	0.0245646
	1209	0.88015	0.948336		1209	0.753223	0.89317		1209	0.573507	0.791255		1209	0.304492	0.498149		1209	0.0636343	0.153561		1209	-0.0212228	-0.0453896
	1210		0		1210		0		1210		0		1210		0		1210		0		1210		0
	1211	0.885553	0.954157		1211	0.742357	0.880285		1211	0.567826	0.783416		1211	0.307403	0.502911		1211	0.0936579	0.226013		1211	0.0919666	0.196691
	1212	0.860828	0.927516		1212	0.700142	0.830227		1212	0.471022	0.649857		1212	0.153454	0.251051		1212	0.0152479	0.036796		1212	0.0121331	0.0259493
	1213		0		1213		0		1213		0		1213		0		1213		0		1213		0
	1214	0.887032	0.955751		1214	0.763715	0.905611		1214	0.622891	0.859387		1214	0.384703	0.629374		1214	0.149552	0.360896		1214	0.143942	0.307851
	1215	0.851468	0.917432		1215	0.701716	0.832094		1215	0.528914	0.72973		1215	0.283737	0.464194		1215	0.0751046	0.181241		1215	0.0641511	0.137201
	1216	0.866943	0.934105		1216	0.746474	0.885168		1216	0.597778	0.82474		1216	0.370434	0.606029		1216	0.135242	0.326363		1216	0.124963	0.26726
	1217	0.862941	0.929793		1217	0.712406	0.844769		1217	0.537352	0.741372		1217	0.309751	0.506752		1217	0.0866838	0.209184		1217	0.0601993	0.128749
	1218		0		1218		0		1218		0		1218		0		1218		0		1218		0
	1219	0.866097	0.933194		1219	0.681756	0.808425		1219	0.545746	0.752953		1219	0.303849	0.497097		1219	0.0788137	0.190192		1219	0.0881234	0.188471
	1220	0.884234	0.952736		1220	0.707312	0.838729		1220	0.545929	0.753205		1220	0.320361	0.524111		1220	0.116596	0.281368		1220	0.0705811	0.150953
	1221	0.860961	0.927659		1221	0.731261	0.867127		1221	0.596819	0.823417		1221	0.340958	0.557807		1221	0.0937925	0.226338		1221	0.0982042	0.210031
	1222	0.872379	0.939962		1222	0.717913	0.8513		1222	0.620914	0.85666		1222	0.324119	0.530259		1222	0.106171	0.256211		1222	0.121814	0.260525
	1223	0.846808	0.91241		1223	0.667739	0.791803		1223	0.489175	0.674903		1223	0.291438	0.476792		1223	0.0563735	0.13604		1223	0.0573593	0.122675
	1224	0.833119	0.897661		1224	0.675259	0.80072		1224	0.50958	0.703055		1224	0.266937	0.43671		1224	0.0606254	0.1463		1224	0.0506665	0.108361
	1225		0		1225		0		1225		0		1225		0		1225		0		1225		0
