# Supplementary material for: LC8 enhances 53BP1 foci through heterogeneous bridging of 53BP1 oligomers
Source: eLife. 2025 Apr 29;14:e102179. doi: 10.7554/eLife.102179 (PMC12187134; doi:10.7554/eLife.102179)
Supplement: Figure 3—source data 1. [file elife-102179-fig3-data1.xlsx]

## Sheet: LBD titration with LC8 by SEC
Free LBD	volume (mL)	RI		1 equivalent LC8	volume (mL)	RI		2 equivalent LC8	volume (mL)	RI		4 equivalent LC8	volume (mL)	RI
	-0.31014	-2.6977e-05			-0.315822	0.0074733			0.856995	-0.00115101			5.38938	-1.50646e-05
	-0.304	-1.04421e-05			-0.309681	0.00744268			0.863135	-0.00112176			5.39552	-1.0825e-05
	-0.297859	6.27277e-07			-0.303541	0.00742285			0.869275	-0.00112354			5.40166	-8.63145e-06
	-0.291719	1.01169e-05			-0.297401	0.00742004			0.875416	-0.0011276			5.4078	-6.43794e-06
	-0.285579	1.77281e-05			-0.29126	0.00741072			0.881556	-0.00113167			5.41394	8.62184e-06
	-0.279438	2.05939e-05			-0.28512	0.00740292			0.887697	-0.00110617			5.42008	1.75091e-05
	-0.273298	2.21022e-05			-0.278979	0.00739643			0.893837	-0.00108797			5.42622	2.25668e-05
	-0.267157	2.36106e-05			-0.272839	0.00738404			0.899977	-0.00107016			5.43236	2.04538e-05
	-0.261017	2.69234e-05			-0.266699	0.00728694			0.906118	-0.00104483			5.4385	1.83409e-05
	-0.254877	2.8009e-05			-0.260558	0.0065815			0.912258	-0.00103307			5.44464	-9.39652e-07
	-0.248736	2.83925e-05			-0.254418	0.00570961			0.918399	-0.00102469			5.45078	-3.84178e-06
	-0.242596	2.64496e-05			-0.248277	0.00547547			0.924539	-0.000988611			5.45692	7.82751e-06
	-0.236455	2.45067e-05			-0.242137	0.00555157			0.93068	-0.000937262			5.46306	1.07061e-05
	-0.230315	1.22671e-05			-0.235997	0.00571924			0.93682	-0.000942924			5.4692	1.23069e-05
	-0.224175	5.03653e-06			-0.229856	0.00597179			0.94296	-0.000948587			5.47534	1.38188e-05
	-0.218034	4.17143e-06			-0.223716	0.00622582			0.949101	-0.000966815			5.48149	1.53308e-05
	-0.211894	3.30633e-06			-0.217575	0.00643273			0.955241	-0.000938062			5.48763	1.64265e-05
	-0.205753	1.27011e-06			-0.211435	0.00658046			0.961382	-0.000880084			5.49377	1.75222e-05
	-0.199613	-3.5943e-06			-0.205295	0.00669188			0.967522	-0.000854249			5.49991	1.68551e-05
	-0.193473	-2.60836e-06			-0.199154	0.00680991			0.973662	-0.000827638			5.50605	-8.68783e-06
	-0.187332	3.57533e-06			-0.193014	0.00691697			0.979803	-0.000805968			5.51219	-2.56777e-05
	-0.181192	3.61529e-06			-0.186873	0.00699016			0.985943	-0.000765153			5.51833	-4.32301e-05
	-0.175051	3.65525e-06			-0.180733	0.00700752			0.992084	-0.000693463			5.52447	-4.92015e-05
	-0.168911	2.51017e-06			-0.174593	0.00701006			0.998224	-0.000651733			5.53061	-4.89967e-05
	-0.162771	-7.43197e-06			-0.168452	0.00701261			1.00436	-0.000642374			5.53675	-4.87918e-05
	-0.15663	-1.47222e-05			-0.162312	0.0069895			1.0105	-0.000631139			5.54289	-5.66779e-05
	-0.15049	-1.37577e-05			-0.156171	0.00699149			1.01665	-0.000631784			5.54903	-6.3289e-05
	-0.144349	-1.36452e-05			-0.150031	0.00700744			1.02279	-0.000624618			5.55517	-5.10512e-05
	-0.138209	-1.35326e-05			-0.143891	0.00704848			1.02893	-0.00060409			5.56131	-4.4315e-05
	-0.132069	-1.41421e-05			-0.13775	0.00713327			1.03507	-0.000545618			5.56745	-4.63467e-05
	-0.125928	-1.54814e-05			-0.13161	0.00725323			1.04121	-0.000481652			5.57359	-4.83783e-05
	-0.119788	-1.38151e-05			-0.125469	0.00740919			1.04735	-0.000467265			5.57973	-5.4864e-05
	-0.113647	-1.34957e-05			-0.119329	0.00760281			1.05349	-0.000445588			5.58587	-7.39263e-05
	-0.107507	-1.39264e-05			-0.113189	0.00779974			1.05963	-0.000390024			5.59201	-7.99291e-05
	-0.101367	-1.4357e-05			-0.107048	0.00797394			1.06577	-0.00033643			5.59815	-7.62049e-05
	-0.0952261	-2.24913e-05			-0.100908	0.008124			1.07191	-0.000294118			5.60429	-7.32308e-05
	-0.0890857	-2.98866e-05			-0.0947674	0.00825445			1.07805	-0.000281656			5.61043	-7.19751e-05
	-0.0829453	-3.25211e-05			-0.088627	0.00834802			1.08419	-0.000278723			5.61657	-7.07194e-05
	-0.0768049	-3.22616e-05			-0.0824866	0.00836689			1.09033	-0.00027579			5.62271	-7.12538e-05
	-0.0706645	-3.07695e-05			-0.0763462	0.00837202			1.09647	-0.000248684			5.62885	-5.84193e-05
	-0.0645241	-3.0132e-05			-0.0702058	0.00833833			1.10261	-0.000211189			5.635	-5.77099e-05
	-0.0583837	-2.94946e-05			-0.0640654	0.00830465			1.10875	-0.000200584			5.64114	-5.70006e-05
	-0.0522433	-2.77353e-05			-0.057925	0.00821621			1.11489	-0.00018098			5.64728	-6.50677e-05
	-0.0461029	-2.57869e-05			-0.0517846	0.00811478			1.12103	-0.000155154			5.65342	-9.45266e-05
	-0.0399625	-2.49492e-05			-0.0456442	0.00799003			1.12717	-0.000129622			5.65956	-0.000101044
	-0.0338221	-2.51652e-05			-0.0395038	0.00785646			1.13331	-8.80184e-05			5.6657	-0.000100152
	-0.0276817	-2.53813e-05			-0.0333634	0.00771553			1.13945	-7.34177e-05			5.67184	-0.000100444
	-0.0215413	-3.48352e-05			-0.027223	0.00757318			1.14559	-7.07915e-05			5.67798	-0.000101782
	-0.0154009	-4.06522e-05			-0.0210826	0.00744867			1.15173	-8.20941e-05			5.68412	-0.000113003
	-0.0092605	-4.07074e-05			-0.0149422	0.00734966			1.15787	-9.33967e-05			5.69026	-0.000121217
	-0.0031201	-4.15897e-05			-0.00880177	0.00725958			1.16401	-8.94866e-05			5.6964	-0.000110859
	0.0030203	-4.21164e-05			-0.00266137	0.00716921			1.17016	-7.48406e-05			5.70254	-0.0001102
	0.0091607	-4.60827e-05			0.00347903	0.00708708			1.1763	-5.1237e-05			5.70868	-0.000109542
	0.0153011	-5.0502e-05			0.00961943	0.00702384			1.18244	-1.97659e-05			5.71482	-0.000111129
	0.0214415	-4.98245e-05			0.0157598	0.00697617			1.18858	-2.29295e-05			5.72096	-0.00012531
	0.0275819	-4.96987e-05			0.0219002	0.00693679			1.19472	-2.60931e-05			5.7271	-0.000139534
	0.0337223	-4.95729e-05			0.0280406	0.00690424			1.20086	1.52024e-05			5.73324	-0.00013391
	0.0398627	-5.15694e-05			0.034181	0.00686335			1.207	7.17559e-05			5.73938	-0.000127381
	0.0460031	-6.09219e-05			0.0403214	0.00680522			1.21314	9.36386e-05			5.74552	-0.000125306
	0.0521435	-7.03412e-05			0.0464618	0.00676971			1.21928	8.50492e-05			5.75166	-0.000125698
	0.0582839	-7.43396e-05			0.0526022	0.00674886			1.22542	7.64597e-05			5.7578	-0.000126089
	0.0644243	-7.7803e-05			0.0587426	0.00672672			1.23156	6.14302e-05			5.76394	-0.000113183
	0.0705647	-8.0078e-05			0.064883	0.00672633			1.2377	7.25924e-05			5.77008	-0.000105555
	0.0767051	-8.41194e-05			0.0710234	0.00671221			1.24384	0.000128775			5.77622	-0.000107879
	0.0828455	-8.88774e-05			0.0771638	0.00669716			1.24998	0.000131374			5.78236	-0.000110203
	0.0889859	-8.86614e-05			0.0833042	0.00670526			1.25612	0.000133972			5.78851	-0.000118723
	0.0951263	-8.86858e-05			0.0894446	0.00670673			1.26226	0.000141482			5.79465	-0.000137322
	0.101267	-8.87103e-05			0.095585	0.00670819			1.2684	0.00017704			5.80079	-0.000136232
	0.107407	-9.01101e-05			0.101725	0.00670521			1.27454	0.000204696			5.80693	-0.000126581
	0.113548	-9.60924e-05			0.107866	0.00668507			1.28068	0.000210468			5.81307	-0.000124297
	0.119688	-0.000104648			0.114006	0.00666448			1.28682	0.000209341			5.81921	-0.000123555
	0.125828	-0.000107921			0.120147	0.00664945			1.29296	0.000190497			5.82535	-0.000122814
	0.131969	-0.000107026			0.126287	0.00664598			1.2991	0.000171652			5.83149	-0.000119811
	0.138109	-0.000105262			0.132427	0.00663985			1.30524	0.000162724			5.83763	-0.000110577
	0.14425	-0.000104904			0.138568	0.00662522			1.31138	0.000174166			5.84377	-0.000105538
	0.15039	-0.000104545			0.144708	0.00660373			1.31752	0.000185165			5.84991	-0.000109097
	0.15653	-0.000100153			0.150849	0.00658519			1.32367	0.000219383			5.85605	-0.000112656
	0.162671	-9.16644e-05			0.156989	0.00658252			1.32981	0.00024052			5.86219	-0.000135866
	0.168811	-8.54786e-05			0.163129	0.00656854			1.33595	0.000262327			5.86833	-0.000152432
	0.174952	-8.50464e-05			0.16927	0.00654902			1.34209	0.000301118			5.87447	-0.000143969
	0.181092	-8.55713e-05			0.17541	0.00652186			1.34823	0.000350855			5.88061	-0.000142636
	0.187232	-8.60962e-05			0.181551	0.00647393			1.35437	0.000364703			5.88675	-0.000141303
	0.193373	-8.85099e-05			0.187691	0.00644164			1.36051	0.000362611			5.89289	-0.000143412
	0.199513	-8.50811e-05			0.193831	0.00642479			1.36665	0.000360519			5.89903	-0.000146493
	0.205654	-8.08819e-05			0.199972	0.00640808			1.37279	0.000368667			5.90517	-0.000129614
	0.211794	-7.58427e-05			0.206112	0.00638988			1.37893	0.000389137			5.91131	-0.000105831
	0.217934	-7.30533e-05			0.212253	0.00637324			1.38507	0.00040022			5.91745	-0.000104022
	0.224075	-7.24554e-05			0.218393	0.00636222			1.39121	0.000429225			5.92359	-0.000100863
	0.230215	-6.82337e-05			0.224533	0.00636579			1.39735	0.000429214			5.92973	-0.000101842
	0.236356	-6.27301e-05			0.230674	0.00636701			1.40349	0.000429203			5.93587	-0.000102822
	0.242496	-6.26689e-05			0.236814	0.00636822			1.40963	0.000455735			5.94202	-9.03369e-05
	0.248636	-6.26077e-05			0.242955	0.00636685			1.41577	0.00051173			5.94816	-7.47579e-05
	0.254777	-6.65612e-05			0.249095	0.00635587			1.42191	0.00050954			5.9543	-6.96463e-05
	0.260917	-7.67856e-05			0.255235	0.00634586			1.42805	0.000492883			5.96044	-6.46944e-05
	0.267058	-8.25381e-05			0.261376	0.00635169			1.43419	0.000476226			5.96658	-5.97424e-05
	0.273198	-8.59811e-05			0.267516	0.00636422			1.44033	0.000447095			5.97272	-5.52821e-05
	0.279338	-8.53217e-05			0.273657	0.00638207			1.44647	0.00044552			5.97886	-5.08029e-05
	0.285479	-8.57127e-05			0.279797	0.00639782			1.45261	0.000448261			5.985	-4.59396e-05
	0.291619	-8.61037e-05			0.285937	0.0064018			1.45875	0.000455412			5.99114	-4.54178e-05
	0.29776	-8.37112e-05			0.292078	0.00641856			1.46489	0.000475046			5.99728	-4.48959e-05
	0.3039	-7.23693e-05			0.298218	0.00644348			1.47103	0.000479472			6.00342	-6.85824e-05
	0.31004	-6.56466e-05			0.304359	0.00646015			1.47718	0.000506473			6.00956	-7.73894e-05
	0.316181	-6.66315e-05			0.310499	0.00646454			1.48332	0.000536402			6.0157	-8.28012e-05
	0.322321	-6.76164e-05			0.316639	0.00646546			1.48946	0.000540283			6.02184	-8.38081e-05
	0.328462	-7.05522e-05			0.32278	0.00646638			1.4956	0.000527756			6.02798	-8.32244e-05
	0.334602	-7.3787e-05			0.32892	0.00646036			1.50174	0.000515228			6.03412	-8.26408e-05
	0.340742	-7.24397e-05			0.335061	0.00646417			1.50788	0.000494026			6.04026	-8.77424e-05
	0.346883	-7.07001e-05			0.341201	0.00646514			1.51402	0.000493218			6.0464	-8.12997e-05
	0.353023	-6.99302e-05			0.347341	0.0064661			1.52016	0.000491914			6.05254	-7.76164e-05
	0.359164	-6.95588e-05			0.353482	0.00644266			1.5263	0.000499248			6.05868	-7.74333e-05
	0.365304	-6.91874e-05			0.359622	0.00643259			1.53244	0.000499231			6.06482	-7.72502e-05
	0.371444	-6.61872e-05			0.365763	0.00643353			1.53858	0.000495523			6.07096	-9.14472e-05
	0.377585	-6.46798e-05			0.371903	0.0064277			1.54472	0.000491814			6.0771	-0.000104823
	0.383725	-6.47004e-05			0.378043	0.00640824			1.55086	0.000528361			6.08324	-9.89989e-05
	0.389866	-6.4721e-05			0.384184	0.00637485			1.557	0.000529629			6.08938	-8.72385e-05
	0.396006	-7.27951e-05			0.390324	0.00633817			1.56314	0.00052721			6.09553	-8.50318e-05
	0.402146	-7.80696e-05			0.396465	0.00630736			1.56928	0.000508637			6.10167	-8.40443e-05
	0.408287	-7.85615e-05			0.402605	0.00627984			1.57542	0.000490063			6.10781	-8.30567e-05
	0.414427	-7.90867e-05			0.408745	0.00625495			1.58156	0.000450637			6.11395	-7.7412e-05
	0.420568	-7.8444e-05			0.414886	0.00624059			1.5877	0.000453314			6.12009	-6.56259e-05
	0.426708	-7.85081e-05			0.421026	0.00622098			1.59384	0.000479944			6.12623	-6.59193e-05
	0.432848	-7.85721e-05			0.427167	0.0061956			1.59998	0.000474351			6.13237	-6.62127e-05
	0.438989	-8.0176e-05			0.433307	0.00617707			1.60612	0.000468758			6.13851	-7.33941e-05
	0.445129	-7.65187e-05			0.439447	0.00616863			1.61226	0.000460267			6.14465	-9.5442e-05
	0.45127	-7.51487e-05			0.445588	0.00615664			1.6184	0.000480424			6.15079	-9.04354e-05
	0.45741	-7.48668e-05			0.451728	0.00613128			1.62454	0.0005068			6.15693	-7.91384e-05
	0.46355	-7.80431e-05			0.457869	0.00609838			1.63069	0.000501635			6.16307	-7.45933e-05
	0.469691	-8.12194e-05			0.464009	0.00607083			1.63683	0.00049647			6.16921	-7.52676e-05
	0.475831	-8.7781e-05			0.470149	0.0060485			1.64297	0.000478346			6.17535	-7.5942e-05
	0.481972	-8.42498e-05			0.47629	0.0060299			1.64911	0.000413943			6.18149	-8.08442e-05
	0.488112	-7.85921e-05			0.48243	0.00602761			1.65525	0.000395033			6.18763	-6.677e-05
	0.494252	-7.65278e-05			0.488571	0.0060167			1.66139	0.000377792			6.19377	-6.51105e-05
	0.500393	-7.51011e-05			0.494711	0.00599682			1.66753	0.000360552			6.19991	-6.5686e-05
	0.506533	-7.10315e-05			0.500851	0.00598506			1.67367	0.000353295			6.20605	-6.62616e-05
	0.512674	-6.1187e-05			0.506992	0.0059819			1.67981	0.000346038			6.21219	-8.0466e-05
	0.518814	-5.19419e-05			0.513132	0.00597902			1.68595	0.000315319			6.21833	-8.94626e-05
	0.524954	-5.06797e-05			0.519273	0.00596756			1.69209	0.000343563			6.22447	-9.23923e-05
	0.531095	-5.08393e-05			0.525413	0.00595197			1.69823	0.000346915			6.23061	-9.24138e-05
	0.537235	-5.09989e-05			0.531553	0.00592591			1.70437	0.0003341			6.23675	-9.313e-05
	0.543376	-5.54449e-05			0.537694	0.00590741			1.71051	0.000321285			6.24289	-9.38462e-05
	0.549516	-5.03223e-05			0.543834	0.00590539			1.71665	0.000298252			6.24904	-0.000104341
	0.555656	-4.31275e-05			0.549975	0.00589821			1.72279	0.000267424			6.25518	-9.1269e-05
	0.561797	-3.65421e-05			0.556115	0.00588795			1.72893	0.000286173			6.26132	-8.27647e-05
	0.567937	-3.50717e-05			0.562255	0.00587605			1.73507	0.000309074			6.26746	-8.54194e-05
	0.574078	-3.36012e-05			0.568396	0.00586348			1.74121	0.000327904			6.2736	-8.80741e-05
	0.580218	-2.89979e-05			0.574536	0.00585712			1.74735	0.000333226			6.27974	-9.57539e-05
	0.586358	-1.68056e-05			0.580677	0.0058583			1.75349	0.000338106			6.28588	-0.000117461
	0.592499	-1.50291e-05			0.586817	0.00585948			1.75963	0.000376049			6.29202	-0.000113367
	0.598639	-1.40652e-05			0.592957	0.00584654			1.76577	0.000424587			6.29816	-0.00010699
	0.60478	-1.68984e-05			0.599098	0.00583181			1.77191	0.000428621			6.3043	-0.000100613
	0.61092	-1.97316e-05			0.605238	0.00581204			1.77805	0.00042604			6.31044	-9.08836e-05
	0.61706	-2.05306e-05			0.611379	0.00580291			1.7842	0.000402118			6.31658	-8.15913e-05
	0.623201	-1.49898e-05			0.617519	0.00580269			1.79034	0.000378196			6.32272	-6.66785e-05
	0.629341	-1.02576e-05			0.623659	0.00580088			1.79648	0.000367837			6.32886	-3.76244e-05
	0.635482	-9.35711e-06			0.6298	0.00579908			1.80262	0.000361281			6.335	-1.98947e-05
	0.641622	-9.01403e-06			0.63594	0.00579221			1.80876	0.000364535			6.34114	-1.49437e-05
	0.647762	-8.67094e-06			0.642081	0.00579098			1.8149	0.000364755			6.34728	-1.47998e-05
	0.653903	-2.47647e-06			0.648221	0.0057995			1.82104	0.000362439			6.35342	-1.46559e-05
	0.660043	-1.38888e-06			0.654361	0.00580248			1.82718	0.000360123			6.35956	-1.47136e-05
	0.666184	-2.42739e-06			0.660502	0.00580545			1.83332	0.000383057			6.3657	-3.32634e-06
	0.672324	-3.46589e-06			0.666642	0.00579183			1.83946	0.000397211			6.37184	1.15863e-05
	0.678464	-6.11514e-06			0.672783	0.00576685			1.8456	0.00040037			6.37798	1.89361e-05
	0.684605	-1.19176e-05			0.678923	0.00574543			1.85174	0.000378282			6.38412	2.24304e-05
	0.690745	-8.53574e-06			0.685063	0.00574661			1.85788	0.000356193			6.39026	2.59247e-05
	0.696886	-2.77043e-06			0.691204	0.00574695			1.86402	0.000329606			6.3964	4.40346e-05
	0.703026	1.15688e-06			0.697344	0.00574729			1.87016	0.000333887			6.40255	5.03149e-05
	0.709166	4.51106e-06			0.703485	0.00574644			1.8763	0.000331793			6.40869	5.413e-05
	0.715307	1.03856e-05			0.709625	0.00574838			1.88244	0.000329698			6.41483	5.18956e-05
	0.721447	1.81162e-05			0.715765	0.00575229			1.88858	0.000326451			6.42097	4.96612e-05
	0.727588	2.93746e-05			0.721906	0.00575658			1.89472	0.000323204			6.42711	4.14048e-05
	0.733728	3.07695e-05			0.728046	0.0057597			1.90086	0.00033637			6.43325	4.11876e-05
	0.739868	3.13014e-05			0.734187	0.00574978			1.907	0.000331538			6.43939	4.40759e-05
	0.746009	3.18333e-05			0.740327	0.00573987			1.91314	0.000326706			6.44553	4.56729e-05
	0.752149	3.27987e-05			0.746467	0.00572154			1.91928	0.00031509			6.45167	4.72699e-05
	0.75829	3.5191e-05			0.752608	0.00571983			1.92542	0.000276921			6.45781	5.32845e-05
	0.76443	3.91849e-05			0.758748	0.00571288			1.93156	0.00024641			6.46395	7.44657e-05
	0.77057	4.32247e-05			0.764889	0.00571576			1.93771	0.000242141			6.47009	9.35874e-05
	0.776711	4.54036e-05			0.771029	0.00571864			1.94385	0.000265323			6.47623	0.000103625
	0.782851	4.64978e-05			0.777169	0.00571964			1.94999	0.000267876			6.48237	0.000104887
	0.788992	4.7592e-05			0.78331	0.00572082			1.95613	0.00027043			6.48851	0.000106148
	0.795132	5.54573e-05			0.78945	0.00573759			1.96227	0.000282601			6.49465	0.000104325
	0.801272	6.21447e-05			0.795591	0.00574028			1.96841	0.000317437			6.50079	0.000102092
	0.807413	6.06712e-05			0.801731	0.00574298			1.97455	0.000351613			6.50693	0.000106675
	0.813553	5.91977e-05			0.807871	0.00574474			1.98069	0.000365957			6.51307	0.00011649
	0.819694	5.54083e-05			0.814012	0.00572663			1.98683	0.000369645			6.51921	0.000118199
	0.825834	4.90054e-05			0.820152	0.00571559			1.99297	0.000342759			6.52535	0.000119907
	0.831974	5.14011e-05			0.826293	0.0057158			1.99911	0.000315872			6.53149	0.000122154
	0.838115	5.51698e-05			0.832433	0.00571767			2.00525	0.000308763			6.53763	0.000137921
	0.844255	5.95575e-05			0.838573	0.00571954			2.01139	0.000348669			6.54377	0.000138197
	0.850396	6.0577e-05			0.844714	0.00571738			2.01753	0.000385715			6.54991	0.000138472
	0.856536	6.16565e-05			0.850854	0.00572092			2.02367	0.000384712			6.55606	0.000135515
	0.862676	6.96734e-05			0.856995	0.00573578			2.02981	0.000380539			6.5622	0.000117566
	0.868817	7.49525e-05			0.863135	0.00573819			2.03595	0.000376366			6.56834	0.000108981
	0.874957	7.71258e-05			0.869275	0.0057406			2.04209	0.000392911			6.57448	0.000111402
	0.881098	7.81182e-05			0.875416	0.00573729			2.04823	0.000408334			6.58062	0.000119347
	0.887238	7.56914e-05			0.881556	0.00571641			2.05437	0.000407133			6.58676	0.000119931
	0.893378	7.32647e-05			0.887697	0.00570752			2.06051	0.000395075			6.5929	0.000120515
	0.899519	7.60313e-05			0.893837	0.00571164			2.06665	0.000383016			6.59904	0.000118551
	0.905659	8.17452e-05			0.899977	0.00571306			2.07279	0.000343788			6.60518	0.000122285
	0.9118	8.37704e-05			0.906118	0.00571447			2.07893	0.000334289			6.61132	0.000127431
	0.91794	8.44826e-05			0.912258	0.00571397			2.08507	0.000332669			6.61746	0.000124695
	0.92408	8.51948e-05			0.918399	0.00571502			2.09122	0.000328736			6.6236	0.000121958
	0.930221	8.59588e-05			0.924539	0.00572267			2.09736	0.000308034			6.62974	0.000114393
	0.936361	8.94958e-05			0.93068	0.00573353			2.1035	0.000287332			6.63588	8.62177e-05
	0.942502	9.12125e-05			0.93682	0.00574			2.10964	0.000294479			6.64202	7.94436e-05
	0.948642	8.86704e-05			0.94296	0.0057385			2.11578	0.000306697			6.64816	8.08392e-05
	0.954782	8.61283e-05			0.949101	0.00573701			2.12192	0.000300231			6.6543	8.21215e-05
	0.960923	7.47587e-05			0.955241	0.00572476			2.12806	0.000293765			6.66044	8.35167e-05
	0.967063	6.65373e-05			0.961382	0.00571985			2.1342	0.000282824			6.66658	7.70544e-05
	0.973204	6.88086e-05			0.967522	0.00571023			2.14034	0.000229721			6.67272	7.05878e-05
	0.979344	7.43208e-05			0.973662	0.00570981			2.14648	0.000214172			6.67886	7.68755e-05
	0.985484	7.48551e-05			0.979803	0.0057094			2.15262	0.000205935			6.685	7.66846e-05
	0.991625	7.51079e-05			0.985943	0.0057039			2.15876	0.000197698			6.69114	7.64937e-05
	0.997765	7.53607e-05			0.992084	0.00569563			2.1649	0.000185984			6.69728	7.25358e-05
	1.00391	8.38194e-05			0.998224	0.00569761			2.17104	0.000165838			6.70342	5.89104e-05
	1.01005	8.92134e-05			1.00436	0.00569958			2.17718	0.000164423			6.70957	5.2231e-05
	1.01619	8.90283e-05			1.0105	0.00569785			2.18332	0.000176229			6.71571	5.9882e-05
	1.02233	8.88432e-05			1.01665	0.00568252			2.18946	0.00016884			6.72185	7.0082e-05
	1.02847	8.62211e-05			1.02279	0.00565599			2.1956	0.00016145			6.72799	8.22424e-05
	1.03461	8.15206e-05			1.02893	0.00563121			2.20174	0.000138398			6.73413	8.87484e-05
	1.04075	8.52164e-05			1.03507	0.00562912			2.20788	7.627e-05			6.74027	9.36047e-05
	1.04689	8.76772e-05			1.04121	0.00563192			2.21402	4.75192e-05			6.74641	0.00011316
	1.05303	8.81064e-05			1.04735	0.00562935			2.22016	3.60755e-05			6.75255	0.000136012
	1.05917	8.71942e-05			1.05349	0.00561556			2.2263	2.02955e-05			6.75869	0.00013535
	1.06531	8.6282e-05			1.05963	0.00560671			2.23244	1.93063e-05			6.76483	0.000134688
	1.07145	8.63361e-05			1.06577	0.00561189			2.23858	1.25852e-05			6.77097	0.000126773
	1.07759	8.90509e-05			1.07191	0.00561562			2.24473	5.86409e-06			6.77711	0.000102159
	1.08373	9.01513e-05			1.07805	0.00561364			2.25087	3.35264e-05			6.78325	9.60221e-05
	1.08987	8.64602e-05			1.08419	0.00561166			2.25701	3.41762e-05			6.78939	0.000100024
	1.09601	8.2769e-05			1.09033	0.0055798			2.26315	2.30434e-05			6.79553	0.00010161
	1.10215	7.40676e-05			1.09647	0.00555298			2.26929	1.19107e-05			6.80167	9.68835e-05
	1.10829	7.0379e-05			1.10261	0.00555528			2.27543	-6.75547e-06			6.80781	9.21575e-05
	1.11443	6.79544e-05			1.10875	0.00555716			2.28157	-3.52313e-05			6.81395	9.11656e-05
	1.12057	6.9076e-05			1.11489	0.00555356			2.28771	-4.39407e-05			6.82009	9.5478e-05
	1.12671	6.98736e-05			1.12103	0.00554689			2.29385	-2.62495e-05			6.82623	9.41173e-05
	1.13285	7.06713e-05			1.12717	0.0055325			2.29999	-3.37852e-06			6.83237	9.27567e-05
	1.13899	7.22517e-05			1.13331	0.00552802			2.30613	7.63975e-07			6.83851	8.80573e-05
	1.14513	7.8779e-05			1.13945	0.00552982			2.31227	1.71841e-05			6.84465	6.45213e-05
	1.15128	7.91509e-05			1.14559	0.00553161			2.31841	5.21762e-05			6.85079	6.24265e-05
	1.15742	7.94096e-05			1.15173	0.005529			2.32455	9.53696e-05			6.85693	7.12744e-05
	1.16356	7.55842e-05			1.15787	0.00551492			2.33069	0.000107493			6.86308	7.42034e-05
	1.1697	7.17588e-05			1.16401	0.00548388			2.33683	0.000110949			6.86922	7.58514e-05
	1.17584	6.89148e-05			1.17016	0.00545807			2.34297	9.48088e-05			6.87536	7.73737e-05
	1.18198	7.67425e-05			1.1763	0.00545611			2.34911	7.86689e-05			6.8815	7.8896e-05
	1.18812	7.99825e-05			1.18244	0.00545265			2.35525	8.60473e-05			6.88764	9.41321e-05
	1.19426	8.17119e-05			1.18858	0.00543623			2.36139	0.000115432			6.89378	9.93365e-05
	1.2004	8.25818e-05			1.19472	0.00541481			2.36753	0.000130754			6.89992	0.000101072
	1.20654	8.34517e-05			1.20086	0.00540216			2.37367	0.000147141			6.90606	9.2736e-05
	1.21268	8.87109e-05			1.207	0.00539445			2.37981	0.00014434			6.9122	8.43997e-05
	1.21882	9.63572e-05			1.21314	0.00537793			2.38595	0.000141539			6.91834	6.6541e-05
	1.22496	9.4812e-05			1.21928	0.00536524			2.39209	0.000141696			6.92448	6.85322e-05
	1.2311	9.32667e-05			1.22542	0.00535081			2.39824	0.000138379			6.93062	6.98591e-05
	1.23724	8.94495e-05			1.23156	0.00531873			2.40438	0.000111209			6.93676	7.1186e-05
	1.24338	8.37462e-05			1.2377	0.00529013			2.41052	8.40388e-05			6.9429	6.60251e-05
	1.24952	8.4845e-05			1.24384	0.00527667			2.41666	4.06249e-05			6.94904	5.40832e-05
	1.25566	8.70289e-05			1.24998	0.0052687			2.4228	6.73853e-06			6.95518	5.98228e-05
	1.2618	8.74889e-05			1.25612	0.00525803			2.42894	-2.84573e-05			6.96132	6.18312e-05
	1.26794	8.75652e-05			1.26226	0.00524188			2.43508	-3.48267e-05			6.96746	6.13215e-05
	1.27408	8.76415e-05			1.2684	0.00522018			2.44122	-4.21087e-05			6.9736	6.08118e-05
	1.28022	8.68354e-05			1.27454	0.00521949			2.44736	-4.93907e-05			6.97974	3.75048e-05
	1.28636	9.12981e-05			1.28068	0.00521559			2.4535	-6.52126e-05			6.98588	1.68744e-05
	1.2925	9.07104e-05			1.28682	0.00521169			2.45964	-5.9346e-05			6.99202	1.30203e-05
	1.29864	9.01228e-05			1.29296	0.00519774			2.46578	-3.5841e-05			6.99816	1.21172e-05
	1.30479	8.85277e-05			1.2991	0.00517256			2.47192	-3.46509e-05			7.0043	1.12141e-05
	1.31093	7.87988e-05			1.30524	0.00515027			2.47806	-4.59358e-05			7.01044	1.02952e-05
	1.31707	7.15332e-05			1.31138	0.00514004			2.4842	-5.72207e-05			7.01659	1.01585e-05
	1.32321	7.14823e-05			1.31752	0.00513452			2.49034	-9.88701e-05			7.02273	5.20925e-06
	1.32935	7.18166e-05			1.32367	0.00512462			2.49648	-0.000130088			7.02887	7.42163e-06
	1.33549	7.10618e-05			1.32981	0.00511654			2.50262	-0.000141636			7.03501	9.10586e-06
	1.34163	7.0307e-05			1.33595	0.0051087			2.50876	-0.000142909			7.04115	5.02703e-06
	1.34777	6.84301e-05			1.34209	0.00509678			2.5149	-0.000150668			7.04729	9.48205e-07
	1.35391	7.31199e-05			1.34823	0.00509864			2.52104	-0.000158426			7.05343	-1.90049e-05
	1.36005	7.56197e-05			1.35437	0.00510022			2.52718	-0.000172937			7.05957	-2.02058e-05
	1.36619	7.49539e-05			1.36051	0.00508981			2.53332	-0.000152683			7.06571	-3.16264e-06
	1.37233	7.42881e-05			1.36665	0.0050677			2.53946	-0.000145554			7.07185	3.85794e-06
	1.37847	6.92808e-05			1.37279	0.00503808			2.5456	-0.000149002			7.07799	1.63532e-05
	1.38461	6.02186e-05			1.37893	0.00501708			2.55175	-0.000185329			7.08413	2.10593e-05
	1.39075	6.20573e-05			1.38507	0.00500559			2.55789	-0.000221657			7.09027	3.02467e-05
	1.39689	6.54014e-05			1.39121	0.00499491			2.56403	-0.000269728			7.09641	5.88104e-05
	1.40303	6.55168e-05			1.39735	0.0049801			2.57017	-0.000278241			7.10255	8.49483e-05
	1.40917	6.56323e-05			1.40349	0.00497023			2.57631	-0.000286754			7.10869	9.43344e-05
	1.41531	6.45917e-05			1.40963	0.00496531			2.58245	-0.000294416			7.11483	9.93764e-05
	1.42145	6.9272e-05			1.41577	0.00495756			2.58859	-0.000303226			7.12097	0.000104418
	1.42759	7.68319e-05			1.42191	0.00495032			2.59473	-0.000312037			7.12711	0.000107851
	1.43373	7.78505e-05			1.42805	0.00494518			2.60087	-0.000296503			7.13325	0.000110441
	1.43987	7.63459e-05			1.43419	0.00492629			2.60701	-0.000271769			7.13939	0.00012471
	1.44601	7.48414e-05			1.44033	0.0048974			2.61315	-0.000279077			7.14553	0.000146958
	1.45215	6.63758e-05			1.44647	0.00487411			2.61929	-0.000286385			7.15167	0.000149889
	1.4583	6.38019e-05			1.45261	0.00486021			2.62543	-0.000298155			7.15781	0.00015282
	1.46444	6.41997e-05			1.45875	0.00484774			2.63157	-0.000359003			7.16395	0.000164184
	1.47058	6.41339e-05			1.46489	0.00483533			2.63771	-0.000398902			7.1701	0.000176647
	1.47672	6.40681e-05			1.47103	0.00483207			2.64385	-0.000378194			7.17624	0.000177557
	1.48286	5.72438e-05			1.47718	0.00481735			2.64999	-0.000377877			7.18238	0.000178466
	1.489	5.53937e-05			1.48332	0.00480799			2.65613	-0.00038158			7.18852	0.000176392
	1.49514	6.34564e-05			1.48946	0.00481098			2.66227	-0.000385283			7.19466	0.000152102
	1.50128	6.40531e-05			1.4956	0.00480613			2.66841	-0.000385595			7.2008	0.000136419
	1.50742	6.36404e-05			1.50174	0.00479765			2.67455	-0.000340811			7.20694	0.00014256
	1.51356	6.32277e-05			1.50788	0.00478498			2.68069	-0.000350819			7.21308	0.000148701
	1.5197	5.31523e-05			1.51402	0.00475894			2.68683	-0.000360827			7.21922	0.000150459
	1.52584	4.68989e-05			1.52016	0.00473344			2.69297	-0.000378497			7.22536	0.000159625
	1.53198	4.86124e-05			1.5263	0.00472505			2.69911	-0.000440326			7.2315	0.000161486
	1.53812	5.25757e-05			1.53244	0.00472081			2.70526	-0.000459556			7.23764	0.000167284
	1.54426	5.84105e-05			1.53858	0.00471124			2.7114	-0.000443907			7.24378	0.000173127
	1.5504	6.13199e-05			1.54472	0.00469331			2.71754	-0.000440767			7.24992	0.000172239
	1.55654	6.30188e-05			1.55086	0.00468492			2.72368	-0.000441938			7.25606	0.00017135
	1.56268	7.02552e-05			1.557	0.00468381			2.72982	-0.000443109			7.2622	0.000166567
	1.56882	7.5824e-05			1.56314	0.00468608			2.73596	-0.000441228			7.26834	0.000139713
	1.57496	7.58407e-05			1.56928	0.00468335			2.7421	-0.000419748			7.27448	0.000132884
	1.5811	7.58574e-05			1.57542	0.00466191			2.74824	-0.000359866			7.28062	0.0001342
	1.58724	7.28278e-05			1.58156	0.00463585			2.75438	-0.000368282			7.28676	0.000135517
	1.59338	6.91553e-05			1.5877	0.0046111			2.76052	-0.000376697			7.2929	0.000125571
	1.59952	6.85657e-05			1.59384	0.00459828			2.76666	-0.000393072			7.29904	0.000109656
	1.60566	6.8836e-05			1.59998	0.00459962			2.7728	-0.000417377			7.30518	0.00010962
	1.61181	7.07661e-05			1.60612	0.00460096			2.77894	-0.00042107			7.31132	0.000110776
	1.61795	7.15882e-05			1.61226	0.00459109			2.78508	-0.000424938			7.31746	0.000111933
	1.62409	7.24103e-05			1.6184	0.00458395			2.79122	-0.000426541			7.32361	0.000104513
	1.63023	7.29943e-05			1.62454	0.00458876			2.79736	-0.000437184			7.32975	9.39236e-05
	1.63637	7.8479e-05			1.63069	0.00459513			2.8035	-0.000447827			7.33589	7.55534e-05
	1.64251	7.86664e-05			1.63683	0.00459793			2.80964	-0.000444237			7.34203	7.09387e-05
	1.64865	7.88538e-05			1.64297	0.00460073			2.81578	-0.000444084			7.34817	7.35255e-05
	1.65479	7.76247e-05			1.64911	0.00458199			2.82192	-0.000448724			7.35431	7.4896e-05
	1.66093	7.19193e-05			1.65525	0.00456478			2.82806	-0.000453363			7.36045	7.62665e-05
	1.66707	6.55525e-05			1.66139	0.00456011			2.8342	-0.00048749			7.36659	6.93193e-05
	1.67321	6.56385e-05			1.66753	0.00456043			2.84034	-0.000549539			7.37273	6.67998e-05
	1.67935	6.55794e-05			1.67367	0.00455958			2.84648	-0.000569759			7.37887	7.01254e-05
	1.68549	6.55203e-05			1.67981	0.00455873			2.85262	-0.000572673			7.38501	7.10194e-05
	1.69163	6.48678e-05			1.68595	0.00455375			2.85877	-0.000579038			7.39115	7.19134e-05
	1.69777	6.39574e-05			1.69209	0.00455563			2.86491	-0.000585404			7.39729	5.54196e-05
	1.70391	6.77661e-05			1.69823	0.00456222			2.87105	-0.000600967			7.40343	3.26857e-05
	1.71005	7.30089e-05			1.70437	0.00456374			2.87719	-0.000598505			7.40957	1.49014e-05
	1.71619	7.25868e-05			1.71051	0.00456526			2.88333	-0.000570291			7.41571	1.94137e-05
	1.72233	7.21647e-05			1.71665	0.00454943			2.88947	-0.000535815			7.42185	2.05062e-05
	1.72847	7.04016e-05			1.72279	0.00452241			2.89561	-0.00055334			7.42799	2.15987e-05
	1.73461	6.22786e-05			1.72893	0.00450239			2.90175	-0.000570865			7.43413	2.14709e-05
	1.74075	6.42574e-05			1.73507	0.0044959			2.90789	-0.000601736			7.44027	8.22678e-06
	1.74689	7.07562e-05			1.74121	0.00448711			2.91403	-0.000622658			7.44641	1.63137e-05
	1.75303	7.64649e-05			1.74735	0.00447161			2.92017	-0.000614931			7.45255	2.03275e-05
	1.75917	8.08833e-05			1.75349	0.00445257			2.92631	-0.000616643			7.45869	2.16581e-05
	1.76532	8.14954e-05			1.75963	0.00443683			2.93245	-0.000622067			7.46483	2.29887e-05
	1.77146	8.33842e-05			1.76577	0.00443229			2.93859	-0.000627491			7.47097	5.95985e-06
	1.7776	9.55563e-05			1.77191	0.00442855			2.94473	-0.000649998			7.47712	-1.34834e-05
	1.78374	0.000100427			1.77805	0.00441757			2.95087	-0.000628728			7.48326	-1.45802e-05
	1.78988	9.97946e-05			1.7842	0.00439618			2.95701	-0.000613033			7.4894	-1.16832e-05
	1.79602	9.91624e-05			1.79034	0.00436295			2.96315	-0.000608517			7.49554	-1.00771e-05
	1.80216	9.73915e-05			1.79648	0.00434191			2.96929	-0.000623865			7.50168	-9.11623e-06
	1.8083	9.98217e-05			1.80262	0.00433214			2.97543	-0.000639214			7.50782	-8.15541e-06
	1.81444	0.000105645			1.80876	0.00432051			2.98157	-0.000697497			7.51396	-1.91738e-06
	1.82058	0.000106358			1.8149	0.00431767			2.98771	-0.000735695			7.5201	8.93899e-06
	1.82672	0.000105296			1.82104	0.00431463			2.99385	-0.000713924			7.52624	9.49497e-06
	1.83286	0.000104233			1.82718	0.0043023			2.99999	-0.000682004			7.53238	1.0051e-05
	1.839	0.00010443			1.83332	0.0042993			3.00613	-0.000684057			7.53852	3.19441e-06
	1.84514	0.000108877			1.83946	0.00431174			3.01228	-0.00068611			7.54466	-1.44574e-05
	1.85128	0.00011059			1.8456	0.00431255			3.01842	-0.00067531			7.5508	-1.80744e-05
	1.85742	0.000109256			1.85174	0.00431336			3.02456	-0.000634411			7.55694	-1.80013e-05
	1.86356	0.000107923			1.85788	0.00431			3.0307	-0.000581626			7.56308	-1.33322e-05
	1.8697	9.75432e-05			1.86402	0.0042914			3.03684	-0.000572916			7.56922	-1.21758e-05
	1.87584	8.69342e-05			1.87016	0.00427			3.04298	-0.000578576			7.57536	-1.10194e-05
	1.88198	8.38495e-05			1.8763	0.00426359			3.04912	-0.000584237			7.5815	-1.2789e-05
	1.88812	8.35589e-05			1.88244	0.00426577			3.05526	-0.000604829			7.58764	-1.39794e-05
	1.89426	8.32683e-05			1.88858	0.00426796			3.0614	-0.000567853			7.59378	-1.37331e-05
	1.9004	8.20496e-05			1.89472	0.00425161			3.06754	-0.000532558			7.59992	-1.34868e-05
	1.90654	7.96903e-05			1.90086	0.00424132			3.07368	-0.000510212			7.60606	-1.79103e-05
	1.91268	8.12973e-05			1.907	0.00423888			3.07982	-0.000507159			7.6122	-3.2706e-05
	1.91883	8.59474e-05			1.91314	0.00423164			3.08596	-0.000503066			7.61834	-4.83943e-05
	1.92497	8.62954e-05			1.91928	0.00422998			3.0921	-0.000461099			7.62448	-5.8147e-05
	1.93111	8.49584e-05			1.92542	0.00422198			3.09824	-0.000412093			7.63063	-5.89144e-05
	1.93725	8.36214e-05			1.93156	0.00418946			3.10438	-0.000387101			7.63677	-5.63598e-05
	1.94339	7.4214e-05			1.93771	0.0041629			3.11052	-0.000391323			7.64291	-5.60504e-05
	1.94953	7.26655e-05			1.94385	0.00415555			3.11666	-0.000396746			7.64905	-5.5741e-05
	1.95567	7.40645e-05			1.94999	0.00415382			3.1228	-0.000402169			7.65519	-4.6923e-05
	1.96181	7.8494e-05			1.95613	0.00414909			3.12894	-0.00040523			7.66133	-2.73434e-05
	1.96795	7.97029e-05			1.96227	0.00413081			3.13508	-0.000409705			7.66747	-2.40184e-05
	1.97409	8.02168e-05			1.96841	0.00411016			3.14122	-0.000393745			7.67361	-2.41162e-05
	1.98023	8.07307e-05			1.97455	0.00410841			3.14736	-0.000370411			7.67975	-2.4214e-05
	1.98637	8.89212e-05			1.98069	0.00410933			3.1535	-0.000369809			7.68589	-3.74623e-05
	1.99251	8.92992e-05			1.98683	0.00409814			3.15964	-0.000340755			7.69203	-3.00068e-05
	1.99865	8.88815e-05			1.99297	0.0040786			3.16579	-0.000285133			7.69817	-2.59577e-07
	2.00479	8.84637e-05			1.99911	0.00405535			3.17193	-0.000252602			7.70431	3.94242e-06
	2.01093	7.898e-05			2.00525	0.00402553			3.17807	-0.000240951			7.71045	8.14441e-06
	2.01707	7.04017e-05			2.01139	0.00400319			3.18421	-0.000237948			7.71659	2.42082e-05
	2.02321	6.83843e-05			2.01753	0.00399428			3.19035	-0.000234945			7.72273	3.71026e-05
	2.02935	6.86465e-05			2.02367	0.00398443			3.19649	-0.000225066			7.72887	4.96477e-05
	2.03549	6.82409e-05			2.02981	0.00398069			3.20263	-0.00016543			7.73501	7.54368e-05
	2.04163	6.78352e-05			2.03595	0.00396308			3.20877	-0.000112138			7.74115	7.95449e-05
	2.04777	6.5735e-05			2.04209	0.00395166			3.21491	-8.24561e-05			7.74729	8.11156e-05
	2.05391	6.60485e-05			2.04823	0.00395426			3.22105	-6.43239e-05			7.75343	8.15091e-05
	2.06005	6.60129e-05			2.05437	0.00395686			3.22719	-4.51796e-05			7.75957	8.19025e-05
	2.06619	6.59773e-05			2.06051	0.0039569			3.23333	-5.17305e-06			7.76571	9.46069e-05
	2.07234	6.39077e-05			2.06665	0.00393801			3.23947	5.30737e-05			7.77185	0.000106764
	2.07848	5.7241e-05			2.07279	0.00391348			3.24561	7.05832e-05			7.77799	0.000119478
	2.08462	4.88607e-05			2.07893	0.00389288			3.25175	7.31445e-05			7.78414	0.000125088
	2.09076	4.35384e-05			2.08507	0.00388561			3.25789	7.57059e-05			7.79028	0.00012899
	2.0969	4.08636e-05			2.09122	0.00388746			3.26403	7.21553e-05			7.79642	0.000146394
	2.10304	4.00403e-05			2.09736	0.0038814			3.27017	7.73594e-05			7.80256	0.000168653
	2.10918	3.96736e-05			2.1035	0.00386728			3.27631	8.38963e-05			7.8087	0.00018362
	2.11532	3.93068e-05			2.10964	0.00385751			3.28245	0.000114985			7.81484	0.000185381
	2.12146	3.80583e-05			2.11578	0.00385245			3.28859	0.000118341			7.82098	0.000186377
	2.1276	4.62874e-05			2.12192	0.00385304			3.29473	0.000121184			7.82712	0.000187373
	2.13374	4.60501e-05			2.12806	0.00385401			3.30087	0.000148862			7.83326	0.000191271
	2.13988	4.58128e-05			2.1342	0.00384304			3.30701	0.000196129			7.8394	0.000213982
	2.14602	4.37828e-05			2.14034	0.00381513			3.31315	0.00020521			7.84554	0.000232484
	2.15216	3.97889e-05			2.14648	0.00378686			3.3193	0.000201926			7.85168	0.000242717
	2.1583	3.99843e-05			2.15262	0.00376844			3.32544	0.00019246			7.85782	0.000251664
	2.16444	4.34875e-05			2.15876	0.00375845			3.33158	0.000182993			7.86396	0.000264379
	2.17058	4.86673e-05			2.1649	0.00375237			3.33772	0.000172467			7.8701	0.000288743
	2.17672	5.10061e-05			2.17104	0.00374453			3.34386	0.000180382			7.87624	0.000316542
	2.18286	5.33448e-05			2.17718	0.00372394			3.35	0.000220919			7.88238	0.000331215
	2.189	5.37377e-05			2.18332	0.00370589			3.35614	0.00025926			7.88852	0.000335929
	2.19514	5.95687e-05			2.18946	0.00370063			3.36228	0.00026266			7.89466	0.000338542
	2.20128	6.1869e-05			2.1956	0.00369415			3.36842	0.000292167			7.9008	0.000341156
	2.20742	6.30509e-05			2.20174	0.00367955			3.37456	0.000352829			7.90694	0.000358608
	2.21356	6.02404e-05			2.20788	0.00364737			3.3807	0.000403486			7.91308	0.000390557
	2.2197	5.743e-05			2.21402	0.00361034			3.38684	0.000411409			7.91922	0.000420537
	2.22585	5.022e-05			2.22016	0.0035831			3.39298	0.00040741			7.92536	0.000436161
	2.23199	5.29303e-05			2.2263	0.00356475			3.39912	0.000403411			7.9315	0.000451859
	2.23813	5.47796e-05			2.23244	0.00355336			3.40526	0.000402033			7.93765	0.000482305
	2.24427	5.47188e-05			2.23858	0.00354538			3.4114	0.000427914			7.94379	0.000521557
	2.25041	5.4658e-05			2.24473	0.00353561			3.41754	0.000441233			7.94993	0.000551172
	2.25655	5.17189e-05			2.25087	0.00352229			3.42368	0.000460488			7.95607	0.000573488
	2.26269	5.22222e-05			2.25701	0.00351464			3.42982	0.000484031			7.96221	0.000580543
	2.26883	5.31151e-05			2.26315	0.00351395			3.43596	0.000491049			7.96835	0.000586873
	2.27497	5.31531e-05			2.26929	0.00350755			3.4421	0.000504251			7.97449	0.000601536
	2.28111	5.31912e-05			2.27543	0.00348912			3.44824	0.000535906			7.98063	0.000623176
	2.28725	3.99283e-05			2.28157	0.00345932			3.45438	0.000526121			7.98677	0.000648263
	2.29339	2.71564e-05			2.28771	0.00343655			3.46052	0.000516336			7.99291	0.000668114
	2.29953	2.34813e-05			2.29385	0.00343159			3.46666	0.000494284			7.99905	0.000685805
	2.30567	2.32981e-05			2.29999	0.00342793			3.47281	0.000464262			8.00519	0.000716689
	2.31181	2.12557e-05			2.30613	0.00341906			3.47895	0.000470402			8.01133	0.000761286
	2.31795	1.7965e-05			2.31227	0.00340829			3.48509	0.000481598			8.01747	0.000788457
	2.32409	1.07148e-05			2.31841	0.00339369			3.49123	0.000501437			8.02361	0.000804793
	2.33023	5.33707e-06			2.32455	0.00338793			3.49737	0.000514869			8.02975	0.00082198
	2.33637	7.7712e-06			2.33069	0.00338842			3.50351	0.0005283			8.03589	0.000827412
	2.34251	6.12889e-06			2.33683	0.00338435			3.50965	0.000552032			8.04203	0.000839299
	2.34865	4.48658e-06			2.34297	0.0033751			3.51579	0.000609628			8.04817	0.00087239
	2.35479	3.69391e-07			2.34911	0.00335357			3.52193	0.000643215			8.05431	0.000904932
	2.36093	-9.73766e-06			2.35525	0.0033189			3.52807	0.000650444			8.06045	0.000935513
	2.36707	-1.27286e-05			2.36139	0.00329896			3.53421	0.000650203			8.06659	0.000961269
	2.37321	-1.36198e-05			2.36753	0.00328989			3.54035	0.000649963			8.07273	0.000983175
	2.37936	-1.26608e-05			2.37367	0.0032737			3.54649	0.000649576			8.07887	0.00101387
	2.3855	-1.22264e-05			2.37981	0.00326733			3.55263	0.000704314			8.08501	0.00104597
	2.39164	-1.42806e-05			2.38595	0.00325392			3.55877	0.000745007			8.09116	0.00107708
	2.39778	-1.63349e-05			2.39209	0.00323356			3.56491	0.000781819			8.0973	0.00108695
	2.40392	-1.40099e-05			2.39824	0.00322671			3.57105	0.000822759			8.10344	0.00109681
	2.41006	-5.85783e-06			2.40438	0.00321643			3.57719	0.000837446			8.10958	0.00110396
	2.4162	-5.0574e-06			2.41052	0.0031906			3.58333	0.000878286			8.11572	0.00112849
	2.42234	-6.07711e-06			2.41666	0.00316531			3.58947	0.00092885			8.12186	0.00115174
	2.42848	-7.09683e-06			2.4228	0.00313683			3.59561	0.000931308			8.128	0.00118104
	2.43462	-1.64256e-05			2.42894	0.00310323			3.60175	0.000929535			8.13414	0.00120103
	2.44076	-1.76168e-05			2.43508	0.00308859			3.60789	0.000916944			8.14028	0.00121835
	2.4469	-1.7459e-05			2.44122	0.00307947			3.61403	0.000904353			8.14642	0.00124801
	2.45304	-1.73012e-05			2.44736	0.00306468			3.62017	0.000890066			8.15256	0.00128214
	2.45918	-1.86683e-05			2.4535	0.00305101			3.62632	0.000905081			8.1587	0.00130471
	2.46532	-2.35223e-05			2.45964	0.00303405			3.63246	0.000894042			8.16484	0.00130563
	2.47146	-2.14115e-05			2.46578	0.00302219			3.6386	0.000883003			8.17098	0.00130655
	2.4776	-1.72576e-05			2.47192	0.00302075			3.64474	0.000865129			8.17712	0.00130544
	2.48374	-1.52516e-05			2.47806	0.00301936			3.65088	0.000868137			8.18326	0.00130715
	2.48988	-1.77731e-05			2.4842	0.00300558			3.65702	0.000906944			8.1894	0.00132731
	2.49602	-2.02946e-05			2.49034	0.0029754			3.66316	0.000903522			8.19554	0.0013566
	2.50216	-2.71847e-05			2.49648	0.00294293			3.6693	0.000898493			8.20168	0.00136631
	2.5083	-2.81666e-05			2.50262	0.0029261			3.67544	0.000893463			8.20782	0.00137603
	2.51444	-2.76706e-05			2.50876	0.00291021			3.68158	0.000836964			8.21396	0.0013868
	2.52058	-2.3787e-05			2.5149	0.00289317			3.68772	0.000816068			8.2201	0.00141256
	2.52672	-2.34084e-05			2.52104	0.00289204			3.69386	0.000847733			8.22624	0.00144166
	2.53287	-2.33273e-05			2.52718	0.00287673			3.7	0.000864411			8.23238	0.00145127
	2.53901	-2.32461e-05			2.53332	0.00285567			3.70614	0.000863568			8.23852	0.00145474
	2.54515	-1.73057e-05			2.53946	0.00285683			3.71228	0.000862201			8.24467	0.00145821
	2.55129	-1.08038e-05			2.5456	0.00285798			3.71842	0.000878196			8.25081	0.00146914
	2.55743	-1.03677e-05			2.55175	0.00285279			3.72456	0.000906597			8.25695	0.00148719
	2.56357	-1.07683e-05			2.55789	0.00283047			3.7307	0.000932341			8.26309	0.00150908
	2.56971	-1.11688e-05			2.56403	0.00279565			3.73684	0.000922275			8.26923	0.00154492
	2.57585	-1.84825e-05			2.57017	0.00277207			3.74298	0.00091221			8.27537	0.00156469
	2.58199	-1.89803e-05			2.57631	0.00276254			3.74912	0.000890263			8.28151	0.00157668
	2.58813	-1.16376e-05			2.58245	0.00275551			3.75526	0.000870212			8.28765	0.00160748
	2.59427	-6.51212e-06			2.58859	0.00275099			3.7614	0.000899334			8.29379	0.00164662
	2.60041	-5.19703e-06			2.59473	0.00273495			3.76754	0.00092037			8.29993	0.00167832
	2.60655	-2.34297e-06			2.60087	0.00272446			3.77368	0.000925924			8.30607	0.00170613
	2.61269	4.91481e-06			2.60701	0.00272393			3.77983	0.000926194			8.31221	0.00172366
	2.61883	1.23581e-05			2.61315	0.0027209			3.78597	0.000922618			8.31835	0.00173654
	2.62497	1.2864e-05			2.61929	0.00271889			3.79211	0.000929668			8.32449	0.00176154
	2.63111	1.22132e-05			2.62543	0.00270433			3.79825	0.000970368			8.33063	0.00180023
	2.63725	1.15624e-05			2.63157	0.0026766			3.80439	0.000977059			8.33677	0.00184681
	2.64339	8.43579e-07			2.63771	0.00265521			3.81053	0.000975283			8.34291	0.00188529
	2.64953	-1.90524e-06			2.64385	0.00264233			3.81667	0.000953489			8.34905	0.00190815
	2.65567	1.22078e-06			2.64999	0.00263116			3.82281	0.000931696			8.35519	0.00195025
	2.66181	4.84541e-06			2.65613	0.00262248			3.82895	0.000918226			8.36133	0.00200924
	2.66795	4.9959e-06			2.66227	0.00262168			3.83509	0.000945246			8.36747	0.00204703
	2.67409	5.14639e-06			2.66841	0.00261012			3.84123	0.000972189			8.37361	0.00207353
	2.68023	3.88664e-06			2.67455	0.00259769			3.84737	0.000970341			8.37975	0.0021049
	2.68638	1.16971e-05			2.68069	0.0025998			3.85351	0.000968493			8.38589	0.00212201
	2.69252	1.57842e-05			2.68683	0.00259858			3.85965	0.000988985			8.39203	0.0021358
	2.69866	1.6762e-05			2.69297	0.00259094			3.86579	0.00103605			8.39818	0.00217371
	2.7048	1.42127e-05			2.69911	0.00257288			3.87193	0.00103613			8.40432	0.00221599
	2.71094	1.16635e-05			2.70526	0.00254098			3.87807	0.00103041			8.41046	0.00224289
	2.71708	7.93878e-06			2.7114	0.00251687			3.88421	0.0010247			8.4166	0.00227169
	2.72322	1.01698e-05			2.71754	0.00250664			3.89035	0.000983228			8.42274	0.00230602
	2.72936	1.37618e-05			2.72368	0.0024996			3.89649	0.000971556			8.42888	0.00234693
	2.7355	1.48753e-05			2.72982	0.00249468			3.90263	0.000991324			8.43502	0.00240627
	2.74164	1.51717e-05			2.73596	0.00247792			3.90877	0.000992513			8.44116	0.0024506
	2.74778	1.54682e-05			2.7421	0.00246667			3.91491	0.000990315			8.4473	0.00247422
	2.75392	2.41093e-05			2.74824	0.00247051			3.92105	0.000983589			8.45344	0.00249037
	2.76006	2.98662e-05			2.75438	0.00247147			3.92719	0.000976862			8.45958	0.00251387
	2.7662	3.25776e-05			2.76052	0.00247244			3.93334	0.000960988			8.46572	0.0025562
	2.77234	3.36171e-05			2.76666	0.00245958			3.93948	0.00095592			8.47186	0.00260464
	2.77848	2.90392e-05			2.7728	0.00244259			3.94562	0.000950852			8.478	0.00265927
	2.78462	2.44613e-05			2.77894	0.00241919			3.95176	0.000902099			8.48414	0.00271033
	2.79076	2.40076e-05			2.78508	0.00241836			3.9579	0.00084105			8.49028	0.00274564
	2.7969	2.96461e-05			2.79122	0.00241516			3.96404	0.000790349			8.49642	0.00280248
	2.80304	3.64056e-05			2.79736	0.00241195			3.97018	0.000777095			8.50256	0.00287015
	2.80918	4.03944e-05			2.8035	0.00239836			3.97632	0.000768759			8.5087	0.00292533
	2.81532	4.13846e-05			2.80964	0.00238984			3.98246	0.000756884			8.51484	0.00298062
	2.82146	4.49053e-05			2.81578	0.00238826			3.9886	0.00073295			8.52098	0.0030287
	2.8276	5.18256e-05			2.82192	0.00238102			3.99474	0.000696123			8.52712	0.00305627
	2.83374	5.62385e-05			2.82806	0.00238082			4.00088	0.000692992			8.53326	0.00309912
	2.83989	5.83191e-05			2.8342	0.00236967			4.00702	0.000717398			8.5394	0.00317009
	2.84603	5.73113e-05			2.84034	0.00233856			4.01316	0.000704331			8.54554	0.00322779
	2.85217	5.63035e-05			2.84648	0.00231384			4.0193	0.000691264			8.55169	0.00328449
	2.85831	5.42574e-05			2.85262	0.0023056			4.02544	0.000669715			8.55783	0.00334102
	2.86445	5.61348e-05			2.85877	0.0023014			4.03158	0.000617256			8.56397	0.00341484
	2.87059	6.28021e-05			2.86491	0.00230231			4.03772	0.000566025			8.57011	0.00349459
	2.87673	6.57827e-05			2.87105	0.00230101			4.04386	0.000539116			8.57625	0.0035668
	2.88287	6.70959e-05			2.87719	0.00228815			4.05	0.000534166			8.58239	0.00364393
	2.88901	6.84091e-05			2.88333	0.00228517			4.05614	0.000529216			8.58853	0.00370742
	2.89515	7.50821e-05			2.88947	0.00228803			4.06228	0.000491957			8.59467	0.00376025
	2.90129	7.80629e-05			2.89561	0.0022909			4.06842	0.000477148			8.60081	0.00382151
	2.90743	7.67743e-05			2.90175	0.00229171			4.07456	0.00050495			8.60695	0.00389843
	2.91357	7.54856e-05			2.90789	0.00228269			4.0807	0.000500082			8.61309	0.00398216
	2.91971	7.17946e-05			2.91403	0.00227012			4.08685	0.000495214			8.61923	0.00406323
	2.92585	5.95183e-05			2.92017	0.00224633			4.09299	0.000488989			8.62537	0.00414847
	2.93199	5.75383e-05			2.92631	0.00224288			4.09913	0.000415452			8.63151	0.00423653
	2.93813	5.75516e-05			2.93245	0.00224395			4.10527	0.000347628			8.63765	0.00432914
	2.94427	5.75649e-05			2.93859	0.00224502			4.11141	0.000341742			8.64379	0.00444737
	2.95041	5.71274e-05			2.94473	0.00224137			4.11755	0.000330491			8.64993	0.00454682
	2.95655	5.34621e-05			2.95087	0.00224046			4.12369	0.00031924			8.65607	0.00462814
	2.96269	5.12105e-05			2.95701	0.00224792			4.12983	0.000296563			8.66221	0.00472655
	2.96883	5.67527e-05			2.96315	0.0022582			4.13597	0.00027216			8.66835	0.0048083
	2.97497	5.65967e-05			2.96929	0.00225756			4.14211	0.000262394			8.67449	0.00489435
	2.98111	5.64407e-05			2.97543	0.00225692			4.14825	0.000268738			8.68063	0.00500869
	2.98725	5.36706e-05			2.98157	0.00225191			4.15439	0.000269395			8.68677	0.00513117
	2.9934	4.32643e-05			2.98771	0.00222543			4.16053	0.000247545			8.69291	0.00525319
	2.99954	3.75665e-05			2.99385	0.00222783			4.16667	0.000225695			8.69905	0.00535537
	3.00568	3.61014e-05			2.99999	0.00223024			4.17281	0.000176918			8.7052	0.00547723
	3.01182	3.75503e-05			3.00613	0.00223194			4.17895	0.000153568			8.71134	0.00562442
	3.01796	3.76733e-05			3.01228	0.00223135			4.18509	0.000142575			8.71748	0.00576006
	3.0241	3.77963e-05			3.01842	0.00223077			4.19123	0.000142364			8.72362	0.00589642
	3.03024	3.69513e-05			3.02456	0.00222892			4.19737	0.000133626			8.72976	0.00602688
	3.03638	4.13025e-05			3.0307	0.00223695			4.20351	0.000124888			8.7359	0.00613586
	3.04252	4.37325e-05			3.03684	0.00224181			4.20965	0.000146169			8.74204	0.00624992
	3.04866	4.403e-05			3.04298	0.00223593			4.21579	0.000187983			8.74818	0.00639727
	3.0548	3.98696e-05			3.04912	0.00223006			4.22193	0.000193596			8.75432	0.00654579
	3.06094	3.57091e-05			3.05526	0.00221493			4.22807	0.000184413			8.76046	0.00670176
	3.06708	3.07122e-05			3.0614	0.00219828			4.23421	0.00017523			8.7666	0.00685805
	3.07322	3.04707e-05			3.06754	0.00218992			4.24036	0.000160663			8.77274	0.00700333
	3.07936	3.09542e-05			3.07368	0.00219236			4.2465	0.000107158			8.77888	0.00717042
	3.0855	3.09925e-05			3.07982	0.0021948			4.25264	0.000105858			8.78502	0.00734871
	3.09164	3.10308e-05			3.08596	0.00219396			4.25878	0.000116918			8.79116	0.00751543
	3.09778	3.03717e-05			3.0921	0.00218912			4.26492	0.00011705			8.7973	0.00766583
	3.10392	3.39043e-05			3.09824	0.00219845			4.27106	0.000117182			8.80344	0.00780475
	3.11006	3.64389e-05			3.10438	0.00220421			4.2772	0.000113221			8.80958	0.00794385
	3.1162	3.71252e-05			3.11052	0.00220735			4.28334	0.000118826			8.81572	0.00809932
	3.12234	3.38252e-05			3.11666	0.00219907			4.28948	0.000128824			8.82186	0.00827324
	3.12848	3.05253e-05			3.1228	0.00219078			4.29562	0.000121789			8.828	0.00845608
	3.13462	2.09494e-05			3.12894	0.00216399			4.30176	0.000114753			8.83414	0.00863749
	3.14076	1.40569e-05			3.13508	0.0021592			4.3079	9.71429e-05			8.84028	0.00880028
	3.14691	1.1852e-05			3.14122	0.00215223			4.31404	6.79045e-05			8.84642	0.00897351
	3.15305	1.17055e-05			3.14736	0.00215292			4.32018	5.04797e-05			8.85256	0.00918055
	3.15919	9.19731e-06			3.1535	0.00215417			4.32632	4.49341e-05			8.85871	0.00937111
	3.16533	3.95222e-06			3.15964	0.00215542			4.33246	5.40131e-05			8.86485	0.00954514
	3.17147	-6.70404e-07			3.16579	0.00215388			4.3386	5.91987e-05			8.87099	0.00971799
	3.17761	-1.44724e-06			3.17193	0.00216649			4.34474	5.85084e-05			8.87713	0.00987134
	3.18375	-3.51835e-06			3.17807	0.00216706			4.35088	6.225e-05			8.88327	0.0100379
	3.18989	-5.58947e-06			3.18421	0.00216762			4.35702	7.67543e-05			8.88941	0.0102254
	3.19603	-1.48943e-05			3.19035	0.00216322			4.36316	6.57611e-05			8.89555	0.0104183
	3.20217	-2.54539e-05			3.19649	0.00214112			4.3693	5.47679e-05			8.90169	0.0106101
	3.20831	-3.32165e-05			3.20263	0.00213631			4.37544	2.84296e-05			8.90783	0.0107899
	3.21445	-3.72529e-05			3.20877	0.00213751			4.38158	-2.48901e-05			8.91397	0.0109694
	3.22059	-3.75783e-05			3.21491	0.00213779			4.38772	-4.16221e-05			8.92011	0.0111651
	3.22673	-3.77316e-05			3.22105	0.00213808			4.39387	-4.01694e-05			8.92625	0.0113676
	3.23287	-3.78849e-05			3.22719	0.00213547			4.40001	-4.50217e-05			8.93239	0.011559
	3.23901	-4.34274e-05			3.23333	0.00212935			4.40615	-4.9874e-05			8.93853	0.0117352
	3.24515	-4.33822e-05			3.23947	0.00213477			4.41229	-5.91264e-05			8.94467	0.0118867
	3.25129	-4.3337e-05			3.24561	0.00213759			4.41843	-7.25419e-05			8.95081	0.012044
	3.25743	-4.64747e-05			3.25175	0.00214041			4.42457	-4.32322e-05			8.95695	0.012225
	3.26357	-4.99919e-05			3.25789	0.00213081			4.43071	-4.92363e-05			8.96309	0.0124064
	3.26971	-6.05469e-05			3.26403	0.00210939			4.43685	-5.52404e-05			8.96923	0.0125946
	3.27585	-7.41855e-05			3.27017	0.00208713			4.44299	-7.05472e-05			8.97537	0.0127798
	3.28199	-7.79819e-05			3.27631	0.00207637			4.44913	-0.000102036			8.98151	0.0129464
	3.28813	-7.91122e-05			3.28245	0.00207761			4.45527	-0.000145455			8.98765	0.0131422
	3.29427	-8.10741e-05			3.28859	0.00207697			4.46141	-0.000172708			8.99379	0.0133603
	3.30042	-8.45545e-05			3.29473	0.00206444			4.46755	-0.000167571			8.99993	0.0135529
	3.30656	-8.9479e-05			3.30087	0.00205897			4.47369	-0.000173189			9.00607	0.0137243
	3.3127	-9.02355e-05			3.30701	0.00205961			4.47983	-0.000178807			9.01222	0.0138902
	3.31884	-8.95923e-05			3.31315	0.00205475			4.48597	-0.000190342			9.01836	0.0140447
	3.32498	-8.93359e-05			3.3193	0.00204442			4.49211	-0.000199528			9.0245	0.0142058
	3.33112	-9.42611e-05			3.32544	0.0020356			4.49825	-0.000183371			9.03064	0.0143875
	3.33726	-9.91862e-05			3.33158	0.00201372			4.50439	-0.000194559			9.03678	0.0145661
	3.3434	-0.000113279			3.33772	0.00198632			4.51053	-0.000205746			9.04292	0.0147426
	3.34954	-0.000119287			3.34386	0.00197437			4.51667	-0.000233274			9.04906	0.014907
	3.35568	-0.000119406			3.35	0.00197216			4.52281	-0.000300932			9.0552	0.0150678
	3.36182	-0.000119525			3.35614	0.00196586			4.52895	-0.000316579			9.06134	0.0152543
	3.36796	-0.000120406			3.36228	0.00195844			4.53509	-0.000315199			9.06748	0.0154406
	3.3741	-0.000123775			3.36842	0.00195395			4.54123	-0.000313659			9.07362	0.0155962
	3.38024	-0.000127995			3.37456	0.00195065			4.54738	-0.000318869			9.07976	0.0157339
	3.38638	-0.000123891			3.3807	0.00195924			4.55352	-0.000324078			9.0859	0.0158589
	3.39252	-0.00012218			3.38684	0.00196466			4.55966	-0.000319581			9.09204	0.0159929
	3.39866	-0.000121595			3.39298	0.00196243			4.5658	-0.000292419			9.09818	0.0161423
	3.4048	-0.000123433			3.39912	0.0019602			4.57194	-0.000272989			9.10432	0.0162977
	3.41094	-0.000125271			3.40526	0.00194808			4.57808	-0.000283636			9.11046	0.0164557
	3.41708	-0.000130102			3.4114	0.00193913			4.58422	-0.000294283			9.1166	0.0165996
	3.42322	-0.000132197			3.41754	0.00194495			4.59036	-0.000316173			9.12274	0.0167351
	3.42936	-0.000129299			3.42368	0.00194806			4.5965	-0.000327256			9.12888	0.0168888
	3.4355	-0.000126019			3.42982	0.00194835			4.60264	-0.00030658			9.13502	0.017061
	3.44164	-0.000124267			3.43596	0.00194865			4.60878	-0.00029028			9.14116	0.0172197
	3.44778	-0.000122515			3.4421	0.00194163			4.61492	-0.000255619			9.1473	0.0173539
	3.45393	-0.000120312			3.44824	0.00195643			4.62106	-0.000253088			9.15344	0.0174767
	3.46007	-0.000117704			3.45438	0.00195956			4.6272	-0.00025274			9.15958	0.0176015
	3.46621	-0.000119372			3.46052	0.00196163			4.63334	-0.000226879			9.16573	0.0177376
	3.47235	-0.000121039			3.46666	0.0019637			4.63948	-0.000189531			9.17187	0.0178886
	3.47849	-0.000124951			3.47281	0.00194688			4.64562	-0.000186389			9.17801	0.0180482
	3.48463	-0.000138858			3.47895	0.00192203			4.65176	-0.000188163			9.18415	0.0182067
	3.49077	-0.000146205			3.48509	0.00191537			4.6579	-0.000189937			9.19029	0.0183462
	3.49691	-0.000147096			3.49123	0.00191568			4.66404	-0.000191843			9.19643	0.018497
	3.50305	-0.000147239			3.49737	0.00191366			4.67018	-0.000191332			9.20257	0.0186793
	3.50919	-0.000147927			3.50351	0.00190731			4.67632	-0.00019367			9.20871	0.0188551
	3.51533	-0.000148615			3.50965	0.00189068			4.68246	-0.000181746			9.21485	0.0190201
	3.52147	-0.000152042			3.51579	0.0018851			4.6886	-0.000174847			9.22099	0.0191763
	3.52761	-0.000148377			3.52193	0.00188467			4.69474	-0.000167949			9.22713	0.0193247
	3.53375	-0.000145797			3.52807	0.00188425			4.70089	-0.00015518			9.23327	0.0194822
	3.53989	-0.00014516			3.53421	0.00187969			4.70703	-0.000117463			9.23941	0.019661
	3.54603	-0.000147049			3.54035	0.00186239			4.71317	-0.000116309			9.24555	0.0198673
	3.55217	-0.000148937			3.54649	0.00183859			4.71931	-0.000119955			9.25169	0.0200766
	3.55831	-0.000152353			3.55263	0.00181581			4.72545	-0.000141231			9.25783	0.0202713
	3.56445	-0.000155707			3.55877	0.00181685			4.73159	-0.000162507			9.26397	0.0204849
	3.57059	-0.0001522			3.56491	0.00181753			4.73773	-0.00018166			9.27011	0.0207257
	3.57673	-0.000143117			3.57105	0.00181322			4.74387	-0.000190116			9.27625	0.0209727
	3.58287	-0.000142882			3.57719	0.00180659			4.75001	-0.000195797			9.28239	0.0212275
	3.58901	-0.000142647			3.58333	0.00179202			4.75615	-0.000199577			9.28853	0.0214849
	3.59515	-0.000137013			3.58947	0.00178962			4.76229	-0.000204677			9.29467	0.0217288
	3.60129	-0.000132499			3.59561	0.00179131			4.76843	-0.000209777			9.30081	0.0219819
	3.60744	-0.000131459			3.60175	0.00179301			4.77457	-0.000175016			9.30695	0.0222717
	3.61358	-0.000131939			3.60789	0.00177989			4.78071	-0.000148166			9.31309	0.0225894
	3.61972	-0.000132419			3.61403	0.00176597			4.78685	-0.000157446			9.31924	0.0229289
	3.62586	-0.000138205			3.62017	0.0017472			4.79299	-0.000166726			9.32538	0.0232706
	3.632	-0.000138924			3.62632	0.00173747			4.79913	-0.000187281			9.33152	0.0236092
	3.63814	-0.000133007			3.63246	0.00173876			4.80527	-0.000206865			9.33766	0.0239875
	3.64428	-0.000129444			3.6386	0.00174071			4.81141	-0.000206251			9.3438	0.024405
	3.65042	-0.000128108			3.64474	0.00173836			4.81755	-0.000197893			9.34994	0.0248232
	3.65656	-0.000124494			3.65088	0.00173103			4.82369	-0.000197781			9.35608	0.0252343
	3.6627	-0.0001212			3.65702	0.00173406			4.82983	-0.000200794			9.36222	0.0256407
	3.66884	-0.000109602			3.66316	0.00173846			4.83597	-0.000203806			9.36836	0.0260491
	3.67498	-0.000104923			3.6693	0.00174008			4.84211	-0.000195511			9.3745	0.0264887
	3.68112	-0.000102991			3.67544	0.00174171			4.84825	-0.000147741			9.38064	0.0269771
	3.68726	-0.000105796			3.68158	0.00172246			4.8544	-0.000140477			9.38678	0.0274885
	3.6934	-0.0001086			3.68772	0.00170758			4.86054	-0.000143081			9.39292	0.0280066
	3.69954	-0.000109502			3.69386	0.00170462			4.86668	-0.00017274			9.39906	0.0285303
	3.70568	-0.000102716			3.7	0.00169983			4.87282	-0.000202399			9.4052	0.0290763
	3.71182	-9.72735e-05			3.70614	0.00169602			4.87896	-0.000230846			9.41134	0.0296717
	3.71796	-9.77013e-05			3.71228	0.00169548			4.8851	-0.000214349			9.41748	0.0302988
	3.7241	-9.81291e-05			3.71842	0.00169494			4.89124	-0.000205889			9.42362	0.0309279
	3.73024	-0.00010009			3.72456	0.00168449			4.89738	-0.000205436			9.42976	0.031545
	3.73638	-9.39786e-05			3.7307	0.00168982			4.90352	-0.000209606			9.4359	0.0321415
	3.74252	-9.09527e-05			3.73684	0.0016937			4.90966	-0.000213775			9.44204	0.0327569
	3.74866	-8.94408e-05			3.74298	0.00169017			4.9158	-0.000174665			9.44818	0.0334268
	3.7548	-9.30307e-05			3.74912	0.00168665			4.92194	-0.000166578			9.45432	0.0341482
	3.76095	-9.66206e-05			3.75526	0.00166663			4.92808	-0.000171015			9.46046	0.0348833
	3.76709	-0.000104559			3.7614	0.00164993			4.93422	-0.000181715			9.4666	0.0356242
	3.77323	-0.000107617			3.76754	0.00164826			4.94036	-0.000192414			9.47275	0.0363871
	3.77937	-0.000107822			3.77368	0.00164984			4.9465	-0.000239552			9.47889	0.037196
	3.78551	-0.000108028			3.77983	0.00164769			4.95264	-0.000241933			9.48503	0.0380625
	3.79165	-0.000112015			3.78597	0.00163538			4.95878	-0.00022367			9.49117	0.0389266
	3.79779	-0.000115088			3.79211	0.00162111			4.96492	-0.0002225			9.49731	0.0397703
	3.80393	-0.000112163			3.79825	0.0016225			4.97106	-0.000229009			9.50345	0.0406123
	3.81007	-0.000105552			3.80439	0.00162389			4.9772	-0.000235517			9.50959	0.0414401
	3.81621	-0.000104498			3.81053	0.00161855			4.98334	-0.000244347			9.51573	0.0423117
	3.82235	-0.000104193			3.81667	0.00161887			4.98948	-0.000249936			9.52187	0.0432626
	3.82849	-0.000109485			3.82281	0.00159784			4.99562	-0.000260288			9.52801	0.0442342
	3.83463	-0.000114777			3.82895	0.00156448			5.00177	-0.000270639			9.53415	0.0452136
	3.84077	-0.000116521			3.83509	0.00155501			5.00791	-0.000295002			9.54029	0.0461808
	3.84691	-0.000113394			3.84123	0.00155397			5.01405	-0.000364556			9.54643	0.0471671
	3.85305	-0.000112776			3.84737	0.00155294			5.02019	-0.000399373			9.55257	0.0482349
	3.85919	-0.000112416			3.85351	0.00154605			5.02633	-0.00040446			9.55871	0.0493298
	3.86533	-0.0001127			3.85965	0.00154252			5.03247	-0.000411132			9.56485	0.050381
	3.87147	-0.000112984			3.86579	0.00154405			5.03861	-0.000425652			9.57099	0.0514121
	3.87761	-0.000106215			3.87193	0.00155348			5.04475	-0.000451082			9.57713	0.0524176
	3.88375	-0.000103111			3.87807	0.0015577			5.05089	-0.00046303			9.58327	0.053427
	3.88989	-0.000101674			3.88421	0.00155839			5.05703	-0.000431901			9.58941	0.0545144
	3.89603	-0.000102397			3.89035	0.00155908			5.06317	-0.000439701			9.59555	0.0556425
	3.90217	-0.000103119			3.89649	0.00153673			5.06931	-0.000447502			9.60169	0.05677
	3.90831	-0.000104241			3.90263	0.00152587			5.07545	-0.000464443			9.60783	0.0578877
	3.91446	-0.000102293			3.90877	0.00152077			5.08159	-0.000496576			9.61397	0.0590025
	3.9206	-9.52786e-05			3.91491	0.00152131			5.08773	-0.000522365			9.62011	0.0601628
	3.92674	-8.87829e-05			3.92105	0.00152113			5.09387	-0.000537137			9.62626	0.0613598
	3.93288	-8.81391e-05			3.92719	0.00152094			5.10001	-0.000525381			9.6324	0.0625215
	3.93902	-8.73247e-05			3.93334	0.00151656			5.10615	-0.000508661			9.63854	0.0636418
	3.94516	-8.28545e-05			3.93948	0.00152595			5.11229	-0.00049441			9.64468	0.0647298
	3.9513	-7.41285e-05			3.94562	0.00153154			5.11843	-0.000487199			9.65082	0.0657848
	3.95744	-6.98772e-05			3.95176	0.00153264			5.12457	-0.00047259			9.65696	0.0668777
	3.96358	-7.12722e-05			3.9579	0.00153375			5.13071	-0.000448461			9.6631	0.068031
	3.96972	-7.26672e-05			3.96404	0.00152779			5.13685	-0.000448186			9.66924	0.0691873
	3.97586	-7.62606e-05			3.97018	0.00151559			5.14299	-0.00045063			9.67538	0.0703168
	3.982	-7.87032e-05			3.97632	0.00150723			5.14913	-0.00046773			9.68152	0.0714059
	3.98814	-7.8034e-05			3.98246	0.00151529			5.15528	-0.00048483			9.68766	0.0725128
	3.99428	-7.76566e-05			3.9886	0.00153183			5.16142	-0.000501582			9.6938	0.0736778
	4.00042	-7.87467e-05			3.99474	0.00153499			5.16756	-0.000482435			9.69994	0.0748268
	4.00656	-7.98368e-05			4.00088	0.00153815			5.1737	-0.000463968			9.70608	0.0759113
	4.0127	-8.0156e-05			4.00702	0.00154404			5.17984	-0.000453892			9.71222	0.0769356
	4.01884	-7.45725e-05			4.01316	0.00155435			5.18598	-0.000455994			9.71836	0.0778904
	4.02498	-7.49502e-05			4.0193	0.00155689			5.19212	-0.000435495			9.7245	0.0788514
	4.03112	-7.53278e-05			4.02544	0.00155943			5.19826	-0.000391418			9.73064	0.0798761
	4.03726	-7.7307e-05			4.03158	0.00155386			5.2044	-0.000390224			9.73678	0.0809087
	4.0434	-8.65618e-05			4.03772	0.00153151			5.21054	-0.000398792			9.74292	0.0819155
	4.04954	-8.887e-05			4.04386	0.00152352			5.21668	-0.00040736			9.74906	0.0828762
	4.05568	-8.67056e-05			4.05	0.00152384			5.22282	-0.000466205			9.7552	0.0838101
	4.06183	-8.59778e-05			4.05614	0.00152416			5.22896	-0.000502355			9.76134	0.0847784
	4.06797	-8.50977e-05			4.06228	0.00152083			5.2351	-0.000498472			9.76748	0.0857508
	4.07411	-8.5381e-05			4.06842	0.00150489			5.24124	-0.000473461			9.77362	0.0867325
	4.08025	-8.56643e-05			4.07456	0.0014917			5.24738	-0.000466975			9.77977	0.0877747
	4.08639	-7.91181e-05			4.0807	0.00150277			5.25352	-0.000460489			9.78591	0.0886782
	4.09253	-7.44717e-05			4.08685	0.00150268			5.25966	-0.000461371			9.79205	0.0894261
	4.09867	-7.256e-05			4.09299	0.0015026			5.2658	-0.000430063			9.79819	0.0902026
	4.10481	-7.43445e-05			4.09913	0.00149528			5.27194	-0.000420875			9.80433	0.0909888
	4.11095	-7.6129e-05			4.10527	0.00147429			5.27808	-0.000422893			9.81047	0.0917481
	4.11709	-8.15326e-05			4.11141	0.00145797			5.28422	-0.000426883			9.81661	0.0924823
	4.12323	-8.48086e-05			4.11755	0.00144902			5.29036	-0.000453257			9.82275	0.0932957
	4.12937	-8.3085e-05			4.12369	0.00144941			5.2965	-0.000479631			9.82889	0.0941191
	4.13551	-8.21057e-05			4.12983	0.0014509			5.30264	-0.000490889			9.83503	0.0948354
	4.14165	-8.22829e-05			4.13597	0.00145239			5.30879	-0.000463861			9.84117	0.0954816
	4.14779	-8.24601e-05			4.14211	0.00144619			5.31493	-0.000465726			9.84731	0.0960574
	4.15393	-8.20382e-05			4.14825	0.00146111			5.32107	-0.00046759			9.85345	0.0965783
	4.16007	-7.34568e-05			4.15439	0.00148484			5.32721	-0.00046389			9.85959	0.0970478
	4.16621	-7.19161e-05			4.16053	0.00148544			5.33335	-0.000430301			9.86573	0.0975065
	4.17235	-7.27311e-05			4.16667	0.00148603			5.33949	-0.000393232			9.87187	0.0979725
	4.17849	-7.35461e-05			4.17281	0.00148327			5.34563	-0.000389411			9.87801	0.0984154
	4.18463	-7.55419e-05			4.17895	0.00147086			5.35177	-0.000392327			9.88415	0.0988217
	4.19077	-7.75082e-05			4.18509	0.00147493			5.35791	-0.000408439			9.89029	0.0991777
	4.19691	-7.32853e-05			4.19123	0.00148699			5.36405	-0.000424552			9.89643	0.0995048
	4.20305	-6.66461e-05			4.19737	0.00149212			5.37019	-0.000433278			9.90257	0.0998357
	4.20919	-6.24649e-05			4.20351	0.00149424			5.37633	-0.000420739			9.90871	0.100134
	4.21534	-6.15286e-05			4.20965	0.00149636			5.38247	-0.000413768			9.91485	0.10037
	4.22148	-6.05922e-05			4.21579	0.00149829			5.38861	-0.000412745			9.92099	0.100559
	4.22762	-5.35898e-05			4.22193	0.00150843			5.39475	-0.000416447			9.92713	0.100702
	4.23376	-4.88751e-05			4.22807	0.00151226			5.40089	-0.00042015			9.93328	0.100815
	4.2399	-4.68746e-05			4.23421	0.00151233			5.40703	-0.000395036			9.93942	0.100927
	4.24604	-4.65605e-05			4.24036	0.00151239			5.41317	-0.000386106			9.94556	0.101016
	4.25218	-4.89183e-05			4.2465	0.00149244			5.41931	-0.000387205			9.9517	0.101073
	4.25832	-5.1276e-05			4.25264	0.00147987			5.42545	-0.000400722			9.95784	0.101069
	4.26446	-5.08606e-05			4.25878	0.00147756			5.43159	-0.000414239			9.96398	0.101064
	4.2706	-4.31492e-05			4.26492	0.00147218			5.43773	-0.00043207			9.97012	0.101052
	4.27674	-4.12677e-05			4.27106	0.00146963			5.44387	-0.000454281			9.97626	0.100992
	4.28288	-4.03821e-05			4.2772	0.00146152			5.45001	-0.000458335			9.9824	0.100891
	4.28902	-3.94965e-05			4.28334	0.00144206			5.45615	-0.000451005			9.98854	0.100759
	4.29516	-3.48399e-05			4.28948	0.00143542			5.4623	-0.000453602			9.99468	0.100596
	4.3013	-2.33289e-05			4.29562	0.00143834			5.46844	-0.000456199			10.0008	0.100407
	4.30744	-2.19611e-05			4.30176	0.00142831			5.47458	-0.000427987			10.007	0.100196
	4.31358	-2.12198e-05			4.3079	0.0014107			5.48072	-0.00037971			10.0131	0.0999595
	4.31972	-2.2846e-05			4.31404	0.00138214			5.48686	-0.000356322			10.0192	0.0997021
	4.32586	-2.44722e-05			4.32018	0.00134757			5.493	-0.000367501			10.0254	0.0994205
	4.332	-2.59438e-05			4.32632	0.00133019			5.49914	-0.00037868			10.0315	0.0991054
	4.33814	-1.9979e-05			4.33246	0.00132379			5.50528	-0.000399766			10.0377	0.0987661
	4.34428	-1.27514e-05			4.3386	0.001322			5.51142	-0.000404819			10.0438	0.0984028
	4.35042	-1.03308e-05			4.34474	0.00130683			5.51756	-0.000348022			10.0499	0.0980081
	4.35656	-7.35099e-06			4.35088	0.00128715			5.5237	-0.000297285			10.0561	0.0975929
	4.3627	-3.5446e-06			4.35702	0.00128588			5.52984	-0.000261129			10.0622	0.0971647
	4.36885	1.51684e-06			4.36316	0.0012867			5.53598	-0.000240858			10.0684	0.096722
	4.37499	3.55593e-06			4.3693	0.00128205			5.54212	-0.00023373			10.0745	0.0962699
	4.38113	3.74267e-06			4.37544	0.00127814			5.54826	-0.000188931			10.0806	0.0957873
	4.38727	3.92941e-06			4.38158	0.00126048			5.5544	-0.000132563			10.0868	0.0952721
	4.39341	3.47115e-06			4.38772	0.00123686			5.56054	-0.000126372			10.0929	0.0947411
	4.39955	5.30599e-07			4.39387	0.00122294			5.56668	-0.000130025			10.0991	0.094095
	4.40569	-6.92618e-07			4.40001	0.00121387			5.57282	-0.00014215			10.1052	0.0933834
	4.41183	6.74757e-07			4.40615	0.00120866			5.57896	-0.000154275			10.1113	0.0927394
	4.41797	4.69639e-06			4.41229	0.00120574			5.5851	-0.000128184			10.1175	0.0921157
	4.42411	6.50643e-06			4.41843	0.00120143			5.59124	-0.000108325			10.1236	0.0914929
	4.43025	8.31647e-06			4.42457	0.00119324			5.59738	-9.30414e-05			10.1298	0.0908714
	4.43639	1.57979e-05			4.43071	0.00119576			5.60352	-8.53281e-05			10.1359	0.0902373
	4.44253	2.65231e-05			4.43685	0.00119775			5.60966	-8.75098e-05			10.142	0.0896049
	4.44867	2.91577e-05			4.44299	0.00118748			5.61581	-6.4684e-05			10.1482	0.0889576
	4.45481	3.01322e-05			4.44913	0.00117701			5.62195	-5.53189e-05			10.1543	0.0882789
	4.46095	2.97033e-05			4.45527	0.00116057			5.62809	-6.36139e-05			10.1605	0.0874079
	4.46709	2.92744e-05			4.46141	0.00113939			5.63423	-7.19089e-05			10.1666	0.0865385
	4.47323	3.30158e-05			4.46755	0.00112815			5.64037	-8.8951e-05			10.1728	0.0858497
	4.47937	3.79686e-05			4.47369	0.00112885			5.64651	-0.000127909			10.1789	0.0851452
	4.48551	4.59047e-05			4.47983	0.0011275			5.65265	-0.000132046			10.185	0.0844003
	4.49165	5.02466e-05			4.48597	0.00111569			5.65879	-0.000106402			10.1912	0.0836489
	4.49779	5.18303e-05			4.49211	0.00109743			5.66493	-0.000108731			10.1973	0.082929
	4.50393	5.98085e-05			4.49825	0.0010916			5.67107	-0.000112515			10.2035	0.0822053
	4.51007	7.15497e-05			4.50439	0.00109372			5.67721	-0.000116299			10.2096	0.0814854
	4.51621	7.70556e-05			4.51053	0.00109584			5.68335	-9.62402e-05			10.2157	0.0807723
	4.52236	7.78072e-05			4.51667	0.00108369			5.68949	-7.25352e-05			10.2219	0.080029
	4.5285	7.69688e-05			4.52281	0.0010645			5.69563	-8.05206e-05			10.228	0.0792762
	4.53464	7.61305e-05			4.52895	0.00103966			5.70177	-8.85061e-05			10.2342	0.0785278
	4.54078	7.69154e-05			4.53509	0.00102183			5.70791	-0.000101357			10.2403	0.0777735
	4.54692	8.42941e-05			4.54123	0.00101483			5.71405	-0.000157519			10.2464	0.0770273
	4.55306	8.63131e-05			4.54738	0.00101601			5.72019	-0.000178925			10.2526	0.0762697
	4.5592	9.04642e-05			4.55352	0.00100883			5.72633	-0.000148906			10.2587	0.0754952
	4.56534	9.52782e-05			4.55966	0.000991975			5.73247	-0.000148562			10.2649	0.0747474
	4.57148	9.60397e-05			4.5658	0.000981404			5.73861	-0.00014381			10.271	0.0740113
	4.57762	0.000102156			4.57194	0.000984408			5.74475	-0.000142754			10.2771	0.0732786
	4.58376	0.000110707			4.57808	0.000979817			5.75089	-0.000144927			10.2833	0.0725763
	4.5899	0.000109949			4.58422	0.000975226			5.75703	-9.55831e-05			10.2894	0.0718612
	4.59604	0.000109191			4.59036	0.000952278			5.76317	-5.8066e-05			10.2956	0.0711205
	4.60218	0.000105893			4.5965	0.000932491			5.76932	-6.80364e-05			10.3017	0.0703839
	4.60832	9.55898e-05			4.60264	0.000912588			5.77546	-7.80067e-05			10.3078	0.0696565
	4.61446	9.46314e-05			4.60878	0.000894064			5.7816	-9.48284e-05			10.314	0.0689516
	4.6206	0.000101242			4.61492	0.000885842			5.78774	-0.000106499			10.3201	0.0682344
	4.62674	0.00010196			4.62106	0.000878796			5.79388	-0.000104268			10.3263	0.0674914
	4.63288	0.000102075			4.6272	0.000867256			5.80002	-9.38454e-05			10.3324	0.0667737
	4.63902	0.00010219			4.63334	0.000850995			5.80616	-5.3496e-05			10.3385	0.0660794
	4.64516	0.000106999			4.63948	0.000843762			5.8123	-5.33767e-05			10.3447	0.0653841
	4.6513	0.000116284			4.64562	0.000844568			5.81844	-5.32574e-05			10.3508	0.0647163
	4.65744	0.000118261			4.65176	0.000845374			5.82458	-2.68677e-05			10.357	0.0640623
	4.66358	0.000117698			4.6579	0.000832093			5.83072	2.18899e-06			10.3631	0.0633812
	4.66972	0.000117135			4.66404	0.000806054			5.83686	8.04411e-07			10.3692	0.0627062
	4.67587	0.000114182			4.67018	0.000776478			5.843	-2.30001e-06			10.3754	0.062045
	4.68201	0.000110513			4.67632	0.00075842			5.84914	-2.58564e-05			10.3815	0.0613988
	4.68815	0.000115242			4.68246	0.000760255			5.85528	-4.94129e-05			10.3877	0.0607599
	4.69429	0.000117338			4.6886	0.000760818			5.86142	-7.14256e-05			10.3938	0.0601121
	4.70043	0.000118178			4.69474	0.000747104			5.86756	-4.6279e-05			10.3999	0.0594684
	4.70657	0.000117969			4.70089	0.000736866			5.8737	-4.72765e-05			10.4061	0.0588431
	4.71271	0.000117759			4.70703	0.000734124			5.87984	-5.1225e-05			10.4122	0.058235
	4.71885	0.000120165			4.71317	0.000736134			5.88598	-5.51735e-05			10.4184	0.0576484
	4.72499	0.000122892			4.71931	0.000738144			5.89212	-3.48361e-05			10.4245	0.0570829
	4.73113	0.000123873			4.72545	0.000737749			5.89826	-3.15339e-05			10.4306	0.0565025
	4.73727	0.000121097			4.73159	0.000717051			5.9044	-3.24563e-05			10.4368	0.0559253
	4.74341	0.000118322			4.73773	0.000687264			5.91054	-4.59211e-05			10.4429	0.0553616
	4.74955	0.000110619			4.74387	0.000674981			5.91668	-5.93859e-05			10.4491	0.0548048
	4.75569	0.000108627			4.75001	0.000663937			5.92283	-0.000124962			10.4552	0.0542733
	4.76183	0.000104558			4.75615	0.000657469			5.92897	-0.000184781			10.4613	0.0537502
	4.76797	0.000104986			4.76229	0.000658865			5.93511	-0.000195441			10.4675	0.0532169
	4.77411	0.000105144			4.76843	0.000642333			5.94125	-0.000206101			10.4736	0.0526981
	4.78025	0.000105302			4.77457	0.000634458			5.94739	-0.000216647			10.4798	0.0522005
	4.78639	0.000105055			4.78071	0.00063609			5.95353	-0.000227193			10.4859	0.0517178
	4.79253	0.000108524			4.78685	0.000637722			5.95967	-0.000272362			10.4921	0.0512591
	4.79867	0.000109398			4.79299	0.000627255			5.96581	-0.000259393			10.4982	0.0508081
	4.80481	0.000107167			4.79913	0.000612543			5.97195	-0.000248961			10.5043	0.050355
	4.81095	0.000104936			4.80527	0.000590292			5.97809	-0.000246834			10.5105	0.0499186
	4.81709	9.92029e-05			4.81141	0.000568542			5.98423	-0.000261107			10.5166	0.0494988
	4.82323	9.6678e-05			4.81755	0.000556232			5.99037	-0.00027538			10.5228	0.0490962
	4.82938	0.000101091			4.82369	0.000550212			5.99651	-0.000332428			10.5289	0.0486984
	4.83552	0.000108468			4.82983	0.000550268			6.00265	-0.000356209			10.535	0.0483069
	4.84166	0.000109186			4.83597	0.000550324			6.00879	-0.000363754			10.5412	0.0479212
	4.8478	0.000109904			4.84211	0.000538311			6.01493	-0.000371299			10.5473	0.0475467
	4.85394	0.000113518			4.84825	0.00053645			6.02107	-0.000384993			10.5535	0.0471928
	4.86008	0.000122268			4.8544	0.000535257			6.02721	-0.000419306			10.5596	0.0468522
	4.86622	0.000131457			4.86054	0.000534064			6.03335	-0.000413481			10.5657	0.0465312
	4.87236	0.000131596			4.86668	0.000526843			6.03949	-0.000383933			10.5719	0.0462141
	4.8785	0.000131734			4.87282	0.0005148			6.04563	-0.000389484			10.578	0.0459069
	4.88464	0.000129607			4.87896	0.000491423			6.05177	-0.000395034			10.5842	0.0456164
	4.89078	0.000124987			4.8851	0.000482269			6.05791	-0.000407999			10.5903	0.0453286
	4.89692	0.000125986			4.89124	0.000479151			6.06405	-0.00048084			10.5964	0.0450702
	4.90306	0.000129327			4.89738	0.000473632			6.07019	-0.000513628			10.6026	0.0448269
	4.9092	0.000131772			4.90352	0.000469361			6.07634	-0.000513595			10.6087	0.0445788
	4.91534	0.000132425			4.90966	0.000460142			6.08248	-0.000513561			10.6149	0.0443458
	4.92148	0.000133078			4.9158	0.000450291			6.08862	-0.000513409			10.621	0.0441317
	4.92762	0.000135832			4.92194	0.000450849			6.09476	-0.000520251			10.6271	0.0439357
	4.93376	0.000142941			4.92808	0.000451637			6.1009	-0.000527093			10.6333	0.0437468
	4.9399	0.00014063			4.93422	0.000452425			6.10704	-0.000512823			10.6394	0.0435755
	4.94604	0.000138318			4.94036	0.000447725			6.11318	-0.0004752			10.6456	0.0434199
	4.95218	0.000133453			4.9465	0.000420866			6.11932	-0.000487632			10.6517	0.0432726
	4.95832	0.000125806			4.95264	0.00039808			6.12546	-0.000500064			10.6578	0.043132
	4.96446	0.000124607			4.95878	0.000391581			6.1316	-0.000524181			10.664	0.0430083
	4.9706	0.000120922			4.96492	0.000387568			6.13774	-0.000569092			10.6701	0.0429119
	4.97674	0.000119528			4.97106	0.000386935			6.14388	-0.000574418			10.6763	0.0428284
	4.98289	0.0001199			4.9772	0.000385576			6.15002	-0.000560262			10.6824	0.0427474
	4.98903	0.000120014			4.98334	0.000384218			6.15616	-0.000555195			10.6885	0.0426748
	4.99517	0.000120128			4.98948	0.000394057			6.1623	-0.000556513			10.6947	0.0426155
	5.00131	0.000128524			4.99562	0.000400341			6.16844	-0.000554932			10.7008	0.0425741
	5.00745	0.000129084			5.00177	0.000400611			6.17458	-0.000527379			10.707	0.0425521
	5.01359	0.00012907			5.00791	0.000400882			6.18072	-0.000488809			10.7131	0.0425443
	5.01973	0.000129055			5.01405	0.000397384			6.18686	-0.000471558			10.7192	0.042552
	5.02587	0.000119208			5.02019	0.000377039			6.193	-0.00048578			10.7254	0.0425827
	5.03201	0.000114915			5.02633	0.000368763			6.19914	-0.000500002			10.7315	0.0426313
	5.03815	0.000116924			5.03247	0.000373965			6.20528	-0.000525796			10.7377	0.0426939
	5.04429	0.000118309			5.03861	0.000377727			6.21142	-0.000534519			10.7438	0.0427925
	5.05043	0.00011896			5.04475	0.000375746			6.21756	-0.000515569			10.7499	0.042917
	5.05657	0.000119472			5.05089	0.000373764			6.2237	-0.000496127			10.7561	0.043043
	5.06271	0.000121489			5.05703	0.000374818			6.22985	-0.000497448			10.7622	0.043171
	5.06885	0.000123547			5.06317	0.000380666			6.23599	-0.000500551			10.7684	0.043308
	5.07499	0.000124267			5.06931	0.000380325			6.24213	-0.000503654			10.7745	0.0434684
	5.08113	0.000123854			5.07545	0.000379985			6.24827	-0.00046671			10.7807	0.0436697
	5.08727	0.000123441			5.08159	0.000374731			6.25441	-0.000465245			10.7868	0.043902
	5.09341	0.000119188			5.08773	0.00035008			6.26055	-0.000470798			10.7929	0.044156
	5.09955	0.000111229			5.09387	0.000339211			6.26669	-0.000476352			10.7991	0.0444323
	5.10569	0.000109292			5.10001	0.000334539			6.27283	-0.00049558			10.8052	0.0447308
	5.11183	0.000114381			5.10615	0.000330417			6.27897	-0.000518269			10.8114	0.0450712
	5.11797	0.000113017			5.11229	0.000332521			6.28511	-0.00051279			10.8175	0.0454565
	5.12411	0.000111653			5.11843	0.000326478			6.29125	-0.000490273			10.8236	0.0458628
	5.13025	0.000108017			5.12457	0.000314242			6.29739	-0.000480591			10.8298	0.0462706
	5.1364	0.000110214			5.13071	0.000315291			6.30353	-0.000475807			10.8359	0.0466904
	5.14254	0.000117973			5.13685	0.000319154			6.30967	-0.000476051			10.8421	0.04713
	5.14868	0.0001163			5.14299	0.000320994			6.31581	-0.000449822			10.8482	0.0476261
	5.15482	0.000114626			5.14913	0.000322834			6.32195	-0.000418214			10.8543	0.0481922
	5.16096	0.000110555			5.15528	0.000311292			6.32809	-0.000429468			10.8605	0.0487996
	5.1671	0.000100394			5.16142	0.00029916			6.33423	-0.000440723			10.8666	0.0494472
	5.17324	9.3125e-05			5.16756	0.000292874			6.34037	-0.000458861			10.8728	0.0501282
	5.17938	9.20768e-05			5.1737	0.000295241			6.34651	-0.000501763			10.8789	0.0508665
	5.18552	9.16792e-05			5.17984	0.000297607			6.35265	-0.000526038			10.885	0.0516955
	5.19166	9.12815e-05			5.18598	0.000297963			6.35879	-0.00052148			10.8912	0.0525793
	5.1978	9.00231e-05			5.19212	0.00029551			6.36493	-0.000521324			10.8973	0.0534844
	5.20394	9.18204e-05			5.19826	0.000312813			6.37107	-0.000524052			10.9035	0.0544077
	5.21008	9.57706e-05			5.2044	0.000332601			6.37721	-0.00052678			10.9096	0.0553524
	5.21622	9.79694e-05			5.21054	0.000336925			6.38336	-0.000523174			10.9157	0.056366
	5.22236	9.86907e-05			5.21668	0.000338596			6.3895	-0.000495527			10.9219	0.0574876
	5.2285	9.26914e-05			5.22282	0.000340266			6.39564	-0.000486503			10.928	0.0587076
	5.23464	8.66922e-05			5.22896	0.000323792			6.40178	-0.00048876			10.9342	0.0599896
	5.24078	8.27619e-05			5.2351	0.000322545			6.40792	-0.000518195			10.9403	0.0613228
	5.24692	8.27373e-05			5.24124	0.000331757			6.41406	-0.000547631			10.9464	0.0627281
	5.25306	8.59638e-05			5.24738	0.000332178			6.4202	-0.00056891			10.9526	0.0642809
	5.2592	8.8598e-05			5.25352	0.000332599			6.42634	-0.000534378			10.9587	0.0659635
	5.26534	8.97088e-05			5.25966	0.000330117			6.43248	-0.000508729			10.9649	0.0676749
	5.27148	9.08196e-05			5.2658	0.000321847			6.43862	-0.000481835			10.971	0.0694401
	5.27762	9.76831e-05			5.27194	0.000325645			6.44476	-0.000467254			10.9771	0.0712589
	5.28376	0.000105393			5.27808	0.000329484			6.4509	-0.00045719			10.9833	0.0731251
	5.28991	0.000104637			5.28422	0.000331343			6.45704	-0.000425371			10.9894	0.0751642
	5.29605	0.000103881			5.29036	0.000333202			6.46318	-0.000390268			10.9956	0.0773904
	5.30219	0.000101066			5.2965	0.000320638			6.46932	-0.000373858			11.0017	0.0797258
	5.30833	9.52503e-05			5.30264	0.00030653			6.47546	-0.000371909			11.0078	0.0821724
	5.31447	9.2313e-05			5.30879	0.000299224			6.4816	-0.000373629			11.014	0.084706
	5.32061	9.19487e-05			5.31493	0.000298156			6.48774	-0.00037535			11.0201	0.0876103
	5.32675	9.15843e-05			5.32107	0.000303424			6.49388	-0.000373392			11.0263	0.0908329
	5.33289	9.04429e-05			5.32721	0.000306637			6.50002	-0.000376318			11.0324	0.0941202
	5.33903	8.49196e-05			5.33335	0.000309851			6.50616	-0.000361622			11.0385	0.0974016
	5.34517	8.87068e-05			5.33949	0.000324718			6.5123	-0.000356704			11.0447	0.100658
	5.35131	8.92407e-05			5.34563	0.000331594			6.51844	-0.000351785			11.0508	0.103984
	5.35745	8.88043e-05			5.35177	0.000334725			6.52458	-0.000335726			11.057	0.10756
	5.36359	8.8368e-05			5.35791	0.000335983			6.53072	-0.00030368			11.0631	0.111581
	5.36973	8.08832e-05			5.36405	0.000337241			6.53687	-0.00029907			11.0692	0.115824
	5.37587	7.03524e-05			5.37019	0.000320283			6.54301	-0.000300877			11.0754	0.120214
	5.38201	6.17764e-05			5.37633	0.000312271			6.54915	-0.00032133			11.0815	0.124692
	5.38815	6.10081e-05			5.38247	0.000325797			6.55529	-0.000341782			11.0877	0.129269
	5.39429	6.14083e-05			5.38861	0.00033075			6.56143	-0.000370458			11.0938	0.134256
	5.40043	6.24913e-05			5.39475	0.000335704			6.56757	-0.000362777			11.1	0.139549
	5.40657	6.31882e-05			5.40089	0.000344047			6.57371	-0.000336946			11.1061	0.144891
	5.41271	6.5398e-05			5.40703	0.000356541			6.57985	-0.000337557			11.1122	0.150331
	5.41885	6.81431e-05			5.41317	0.000370703			6.58599	-0.000338169			11.1184	0.155833
	5.42499	7.15909e-05			5.41931	0.000386388			6.59213	-0.000334639			11.1245	0.161481
	5.43113	7.34206e-05			5.42545	0.000393334			6.59827	-0.000288019			11.1307	0.167616
	5.43727	7.06586e-05			5.43159	0.000395158			6.60441	-0.000240479			11.1368	0.174188
	5.44342	6.78967e-05			5.43773	0.000396983			6.61055	-0.000236636			11.1429	0.181032
	5.44956	6.08056e-05			5.44387	0.000395279			6.61669	-0.000242848			11.1491	0.188144
	5.4557	5.98187e-05			5.45001	0.000416048			6.62283	-0.000249061			11.1552	0.195635
	5.46184	6.07728e-05			5.45615	0.000430876			6.62897	-0.000270693			11.1614	0.203736
	5.46798	6.09417e-05			5.4623	0.0004473			6.63511	-0.00026258			11.1675	0.212186
	5.47412	6.11106e-05			5.46844	0.000451481			6.64125	-0.000243763			11.1736	0.220661
	5.48026	5.77659e-05			5.47458	0.000455663			6.64739	-0.000232398			11.1798	0.229195
	5.4864	5.94853e-05			5.48072	0.000469901			6.65353	-0.000229308			11.1859	0.2377
	5.49254	6.03838e-05			5.48686	0.00048477			6.65967	-0.000226218			11.1921	0.246131
	5.49868	6.07264e-05			5.493	0.000490445			6.66581	-0.000214816			11.1982	0.255014
	5.50482	6.01941e-05			5.49914	0.000493735			6.67195	-0.000160699			11.2043	0.264567
	5.51096	5.96617e-05			5.50528	0.000488776			6.67809	-0.000170775			11.2105	0.274411
	5.5171	5.23965e-05			5.51142	0.000483818			6.68423	-0.000180851			11.2166	0.284533
	5.52324	4.83496e-05			5.51756	0.00048329			6.69038	-0.00020717			11.2228	0.294818
	5.52938	5.00862e-05			5.5237	0.0004962			6.69652	-0.000237342			11.2289	0.305392
	5.53552	5.12747e-05			5.52984	0.000500377			6.70266	-0.000250367			11.235	0.316708
	5.54166	5.18614e-05			5.53598	0.000503515			6.7088	-0.000254798			11.2412	0.32831
	5.5478	5.24481e-05			5.54212	0.000506653			6.71494	-0.00026125			11.2473	0.339743
	5.55394	5.38442e-05			5.54826	0.000513799			6.72108	-0.000267702			11.2535	0.351186
	5.56008	6.04798e-05			5.5544	0.000532069			6.72722	-0.000278427			11.2596	0.362483
	5.56622	6.27708e-05			5.56054	0.000535438			6.73336	-0.000270475			11.2657	0.373929
	5.57236	6.38461e-05			5.56668	0.000536659			6.7395	-0.00024196			11.2719	0.38617
	5.5785	5.95251e-05			5.57282	0.00053788			6.74564	-0.000234827			11.278	0.398974
	5.58464	5.52042e-05			5.57896	0.000516717			6.75178	-0.000234557			11.2842	0.411955
	5.59078	4.75166e-05			5.5851	0.000503526			6.75792	-0.000252913			11.2903	0.424946
	5.59693	4.84858e-05			5.59124	0.000519273			6.76406	-0.000271268			11.2964	0.43794
	5.60307	5.00709e-05			5.59738	0.00052344			6.7702	-0.000267552			11.3026	0.451543
	5.60921	5.02495e-05			5.60352	0.000525711			6.77634	-0.000262412			11.3087	0.465761
	5.61535	5.04282e-05			5.60966	0.000527982			6.78248	-0.000259689			11.3149	0.479787
	5.62149	4.3359e-05			5.61581	0.000528992			6.78862	-0.000238943			11.321	0.493567
	5.62763	4.19533e-05			5.62195	0.000540795			6.79476	-0.000226776			11.3271	0.507099
	5.63377	4.38883e-05			5.62809	0.000551222			6.8009	-0.000218191			11.3333	0.520397
	5.63991	4.44302e-05			5.63423	0.000555985			6.80704	-0.000186257			11.3394	0.533831
	5.64605	4.0748e-05			5.64037	0.000552172			6.81318	-0.000140591			11.3456	0.547846
	5.65219	3.70658e-05			5.64651	0.000548358			6.81932	-0.000150214			11.3517	0.562292
	5.65833	2.4995e-05			5.65265	0.000542666			6.82546	-0.000159837			11.3578	0.576694
	5.66447	1.78465e-05			5.65879	0.000548334			6.8316	-0.0001784			11.364	0.590815
	5.67061	1.86492e-05			5.66493	0.000554215			6.83774	-0.000233759			11.3701	0.605155
	5.67675	1.9112e-05			5.67107	0.000568081			6.84389	-0.000242933			11.3763	0.620143
	5.68289	1.85796e-05			5.67721	0.0005752			6.85003	-0.000215942			11.3824	0.635054
	5.68903	1.80473e-05			5.68335	0.000582319			6.85617	-0.000210497			11.3885	0.649736
	5.69517	1.97547e-05			5.68949	0.00059754			6.86231	-0.000211117			11.3947	0.664157
	5.70131	2.83639e-05			5.69563	0.000620586			6.86845	-0.000211736			11.4008	0.6778
	5.70745	2.89107e-05			5.70177	0.000633213			6.87459	-0.000203993			11.407	0.691195
	5.71359	2.89944e-05			5.70791	0.000637562			6.88073	-0.000165108			11.4131	0.705064
	5.71973	2.90782e-05			5.71405	0.000638658			6.88687	-0.000163189			11.4193	0.718938
	5.72587	2.21034e-05			5.72019	0.000639754			6.89301	-0.000166418			11.4254	0.732638
	5.73201	1.87268e-05			5.72633	0.000638601			6.89915	-0.000197895			11.4315	0.746399
	5.73815	1.9041e-05			5.73247	0.00065873			6.90529	-0.000229372			11.4377	0.759969
	5.74429	2.08284e-05			5.73861	0.000671087			6.91143	-0.000252589			11.4438	0.773517
	5.75044	2.07818e-05			5.74475	0.000675989			6.91757	-0.000249287			11.45	0.787024
	5.75658	2.07353e-05			5.75089	0.000685998			6.92371	-0.000233478			11.4561	0.799717
	5.76272	2.03201e-05			5.75703	0.000694542			6.92985	-0.000205587			11.4622	0.811728
	5.76886	2.0644e-05			5.76317	0.00070753			6.93599	-0.00020091			11.4684	0.823148
	5.775	2.25868e-05			5.76932	0.000714961			6.94213	-0.000188332			11.4745	0.834073
	5.78114	2.32012e-05			5.77546	0.00071967			6.94827	-0.000146594			11.4807	0.845244
	5.78728	1.90483e-05			5.7816	0.000714534			6.95441	-7.97063e-05			11.4868	0.856446
	5.79342	1.48954e-05			5.78774	0.000709398			6.96055	-5.95958e-05			11.4929	0.8672
	5.79956	7.60923e-06			5.79388	0.000698822			6.96669	-5.34211e-05			11.4991	0.877502
	5.8057	4.34619e-06			5.80002	0.000707828			6.97283	-6.18654e-05			11.5052	0.887197
	5.81184	4.70888e-06			5.80616	0.000719656			6.97897	-7.03097e-05			11.5114	0.896721
	5.81798	3.66951e-06			5.8123	0.000728833			6.98511	-4.99647e-05			11.5175	0.906286
	5.82412	2.63015e-06			5.81844	0.000733961			6.99125	1.05744e-06			11.5236	0.915275
	5.83026	-1.11919e-07			5.82458	0.000739089			6.9974	3.06053e-05			11.5298	0.923505
	5.8364	7.0097e-07			5.83072	0.000747622			7.00354	4.09153e-05			11.5359	0.931126
	5.84254	8.05028e-06			5.83686	0.000762246			7.00968	4.68537e-05			11.5421	0.93812
	5.84868	7.33018e-06			5.843	0.000778299			7.01582	7.61475e-05			11.5482	0.944896
	5.85482	6.61007e-06			5.84914	0.000781672			7.02196	0.000147478			11.5543	0.951737
	5.86096	3.46805e-06			5.85528	0.000783507			7.0281	0.000145936			11.5605	0.958178
	5.8671	-3.98081e-06			5.86142	0.000785342			7.03424	0.000141933			11.5666	0.964083
	5.87324	-7.66658e-06			5.86756	0.000783733			7.04038	0.000126491			11.5728	0.969386
	5.87938	-9.42988e-06			5.8737	0.000790164			7.04652	0.000111049			11.5789	0.974191
	5.88552	-9.84142e-06			5.87984	0.000804867			7.05266	9.61766e-05			11.585	0.978831
	5.89166	-1.04142e-05			5.88598	0.00081083			7.0588	0.000127659			11.5912	0.983074
	5.8978	-1.09869e-05			5.89212	0.000816794			7.06494	0.000139779			11.5973	0.986692
	5.90395	-1.41892e-05			5.89826	0.000828333			7.07108	0.00014249			11.6035	0.9898
	5.91009	-8.33042e-06			5.9044	0.000844502			7.07722	0.000145202			11.6096	0.992353
	5.91623	-7.04112e-06			5.91054	0.00085108			7.08336	0.000144405			11.6157	0.994485
	5.92237	-6.52656e-06			5.91668	0.000854982			7.0895	0.00018626			11.6219	0.996414
	5.92851	-1.15678e-05			5.92283	0.000845098			7.09564	0.000216296			11.628	0.998034
	5.93465	-1.6609e-05			5.92897	0.000835214			7.10178	0.000204993			11.6342	0.999248
	5.94079	-2.37792e-05			5.93511	0.000824412			7.10792	0.00019369			11.6403	1
	5.94693	-2.5534e-05			5.94125	0.000841365			7.11406	0.000169879			11.6464	0.999943
	5.95307	-2.45963e-05			5.94739	0.000848879			7.1202	0.000142974			11.6526	0.999886
	5.95921	-2.40577e-05			5.95353	0.000853705			7.12634	0.000168044			11.6587	0.999688
	5.96535	-2.60241e-05			5.95967	0.000858783			7.13248	0.000184373			11.6649	0.99881
	5.97149	-2.79906e-05			5.96581	0.000863031			7.13862	0.00018326			11.671	0.997593
	5.97763	-2.83638e-05			5.97195	0.000873615			7.14476	0.000192113			11.6771	0.99601
	5.98377	-2.73192e-05			5.97809	0.00089074			7.15091	0.00019538			11.6833	0.994094
	5.98991	-2.69196e-05			5.98423	0.000898822			7.15705	0.000208944			11.6894	0.99188
	5.99605	-2.94754e-05			5.99037	0.000901922			7.16319	0.00025374			11.6956	0.989296
	6.00219	-3.20312e-05			5.99651	0.000905023			7.16933	0.000263577			11.7017	0.986391
	6.00833	-4.37464e-05			6.00265	0.000897961			7.17547	0.000253312			11.7079	0.983187
	6.01447	-5.12241e-05			6.00879	0.000901548			7.18161	0.000243047			11.714	0.9797
	6.02061	-5.24409e-05			6.01493	0.000909374			7.18775	0.000224241			11.7201	0.975854
	6.02675	-5.29511e-05			6.02107	0.000916195			7.19389	0.000204479			11.7263	0.971545
	6.03289	-5.34613e-05			6.02721	0.000919958			7.20003	0.000237532			11.7324	0.966972
	6.03903	-5.62806e-05			6.03335	0.000923721			7.20617	0.000274267			11.7386	0.962275
	6.04517	-5.78904e-05			6.03949	0.000933831			7.21231	0.000279693			11.7447	0.957388
	6.05131	-5.35993e-05			6.04563	0.000953687			7.21845	0.000285119			11.7508	0.95235
	6.05746	-5.15057e-05			6.05177	0.000962065			7.22459	0.000293211			11.757	0.947075
	6.0636	-5.28499e-05			6.05791	0.000960489			7.23073	0.000324564			11.7631	0.941402
	6.06974	-5.41942e-05			6.06405	0.000958913			7.23687	0.000364527			11.7693	0.935471
	6.07588	-6.10175e-05			6.07019	0.000950541			7.24301	0.00035974			11.7754	0.929389
	6.08202	-6.58819e-05			6.07634	0.000934433			7.24915	0.000354953			11.7815	0.923156
	6.08816	-6.68696e-05			6.08248	0.000940801			7.25529	0.0003414			11.7877	0.916789
	6.0943	-6.75539e-05			6.08862	0.000944963			7.26143	0.000317371			11.7938	0.910011
	6.10044	-6.97565e-05			6.09476	0.000943696			7.26757	0.000325833			11.8	0.902861
	6.10658	-7.53984e-05			6.1009	0.000942428			7.27371	0.000345415			11.8061	0.895784
	6.11272	-7.88457e-05			6.10704	0.000949827			7.27985	0.000358426			11.8122	0.888734
	6.11886	-7.65434e-05			6.11318	0.000958763			7.28599	0.000370989			11.8184	0.881689
	6.125	-7.72056e-05			6.11932	0.000960755			7.29213	0.000375833			11.8245	0.874688
	6.13114	-7.78679e-05			6.12546	0.000962746			7.29827	0.000395206			11.8307	0.86732
	6.13728	-8.02498e-05			6.1316	0.000960485			7.30442	0.000401524			11.8368	0.859569
	6.14342	-9.3582e-05			6.13774	0.000935763			7.31056	0.00040205			11.8429	0.851756
	6.14956	-0.000105209			6.14388	0.000921924			7.3167	0.000371502			11.8491	0.843772
	6.1557	-0.00011105			6.15002	0.000920245			7.32284	0.000340953			11.8552	0.835827
	6.16184	-0.000112942			6.15616	0.000914233			7.32898	0.000292953			11.8614	0.827781
	6.16798	-0.000112391			6.1623	0.000914959			7.33512	0.000292293			11.8675	0.819318
	6.17412	-0.000113214			6.16844	0.000915686			7.34126	0.000286352			11.8736	0.810877
	6.18026	-0.000114037			6.17458	0.000913879			7.3474	0.000280411			11.8798	0.802671
	6.1864	-0.000114145			6.18072	0.000917184			7.35354	0.000272697			11.8859	0.794567
	6.19254	-0.000107918			6.18686	0.000930824			7.35968	0.000259413			11.8921	0.786612
	6.19868	-0.000103317			6.193	0.000938783			7.36582	0.00027511			11.8982	0.778482
	6.20482	-0.000104471			6.19914	0.000942691			7.37196	0.000288901			11.9043	0.769987
	6.21097	-0.000105625			6.20528	0.000939708			7.3781	0.000292953			11.9105	0.761427
	6.21711	-0.000109478			6.21142	0.000936724			7.38424	0.000278913			11.9166	0.752682
	6.22325	-0.000116376			6.21756	0.000929317			7.39038	0.000264874			11.9228	0.743643
	6.22939	-0.000111733			6.2237	0.000940588			7.39652	0.000220135			11.9289	0.734765
	6.23553	-0.000110692			6.22985	0.000945291			7.40266	0.000185779			11.935	0.725936
	6.24167	-0.000110388			6.23599	0.000946933			7.4088	0.000196391			11.9412	0.717048
	6.24781	-0.000110697			6.24213	0.000948576			7.41494	0.000229292			11.9473	0.70847
	6.25395	-0.000111006			6.24827	0.000949084			7.42108	0.000226257			11.9535	0.700053
	6.26009	-0.00010936			6.25441	0.000963496			7.42722	0.000223223			11.9596	0.691879
	6.26623	-0.000109018			6.26055	0.000962869			7.43336	0.000232573			11.9657	0.683839
	6.27237	-0.000109781			6.26669	0.000962242			7.4395	0.000279074			11.9719	0.67534
	6.27851	-0.000110544			6.27283	0.000956869			7.44564	0.00031107			11.978	0.666541
	6.28465	-0.000120618			6.27897	0.000937099			7.45178	0.000298518			11.9842	0.657861
	6.29079	-0.000130689			6.28511	0.000917589			7.45793	0.000285966			11.9903	0.649148
	6.29693	-0.000130651			6.29125	0.000905157			7.46407	0.000257488			11.9964	0.6406
	6.30307	-0.000132113			6.29739	0.000898141			7.47021	0.000224997			12.0026	0.632107
	6.30921	-0.000132041			6.30353	0.000892137			7.47635	0.000241659			12.0087	0.623376
	6.31535	-0.00013197			6.30967	0.000883835			7.48249	0.000245646			12.0149	0.614862
	6.32149	-0.000132221			6.31581	0.000873553			7.48863	0.000245076			12.021	0.606737
	6.32763	-0.000133386			6.32195	0.000871062			7.49477	0.000235485			12.0272	0.598804
	6.33377	-0.000127069			6.32809	0.000872233			7.50091	0.000225893			12.0333	0.591115
	6.33991	-0.0001281			6.33423	0.000873403			7.50705	0.000262333			12.0394	0.583335
	6.34605	-0.000129132			6.34037	0.000850655			7.51319	0.000315012			12.0456	0.575241
	6.35219	-0.000132777			6.34651	0.000827401			7.51933	0.0003117			12.0517	0.567168
	6.35833	-0.000138556			6.35265	0.000801459			7.52547	0.000305547			12.0579	0.559212
	6.36448	-0.00013992			6.35879	0.000784154			7.53161	0.000299394			12.064	0.551467
	6.37062	-0.000141586			6.36493	0.000773448			7.53775	0.000258811			12.0701	0.543759
	6.37676	-0.000141782			6.37107	0.000764121			7.54389	0.000232462			12.0763	0.536021
	6.3829	-0.000141978			6.37721	0.000751481			7.55003	0.000230971			12.0824	0.528361
	6.38904	-0.000142929			6.38336	0.000727223			7.55617	0.000243779			12.0886	0.520781
	6.39518	-0.00014259			6.3895	0.000716191			7.56231	0.000246808			12.0947	0.513354
	6.40132	-0.000140475			6.39564	0.000717286			7.56845	0.000249838			12.1008	0.506206
	6.40746	-0.000139465			6.40178	0.000709319			7.57459	0.000270854			12.107	0.499156
	6.4136	-0.000139009			6.40792	0.000693357			7.58073	0.000293796			12.1131	0.491796
	6.41974	-0.000142759			6.41406	0.000674095			7.58687	0.00029732			12.1193	0.484307
	6.42588	-0.00014651			6.4202	0.000644854			7.59301	0.000289531			12.1254	0.476963
	6.43202	-0.0001528			6.42634	0.000615194			7.59915	0.000281743			12.1315	0.469816
	6.43816	-0.000153677			6.43248	0.000608891			7.60529	0.000270468			12.1377	0.462829
	6.4443	-0.000150564			6.43862	0.000603858			7.61144	0.000241842			12.1438	0.455686
	6.45044	-0.000149194			6.44476	0.000591426			7.61758	0.000258077			12.15	0.448368
	6.45658	-0.00014836			6.4509	0.000578501			7.62372	0.000282291			12.1561	0.441272
	6.46272	-0.000147717			6.45704	0.000569374			7.62986	0.000287587			12.1622	0.434471
	6.46886	-0.000143536			6.46318	0.000569487			7.636	0.000299536			12.1684	0.42795
	6.475	-0.000136896			6.46932	0.000567075			7.64214	0.000297955			12.1745	0.421674
	6.48114	-0.000137593			6.47546	0.000563078			7.64828	0.00031117			12.1807	0.415224
	6.48728	-0.000138289			6.4816	0.000551575			7.65442	0.000342557			12.1868	0.408577
	6.49342	-0.000141673			6.48774	0.000523518			7.66056	0.000336971			12.1929	0.401934
	6.49956	-0.00015011			6.49388	0.000497344			7.6667	0.000331385			12.1991	0.395364
	6.5057	-0.000154077			6.50002	0.000484879			7.67284	0.000314086			12.2052	0.389096
	6.51184	-0.000155625			6.50616	0.000478283			7.67898	0.00027889			12.2114	0.38285
	6.51799	-0.000155737			6.5123	0.000476794			7.68512	0.000255642			12.2175	0.376351
	6.52413	-0.000155849			6.51844	0.000467648			7.69126	0.000257866			12.2236	0.369981
	6.53027	-0.0001659			6.52458	0.000445826			7.6974	0.000256091			12.2298	0.363926
	6.53641	-0.000167197			6.53072	0.000436387			7.70354	0.000242496			12.2359	0.35802
	6.54255	-0.000163637			6.53687	0.00043619			7.70968	0.000228902			12.2421	0.352383
	6.54869	-0.000163701			6.54301	0.000435993			7.71582	0.000234482			12.2482	0.346809
	6.55483	-0.000163765			6.54915	0.00042977			7.72196	0.000250248			12.2543	0.340993
	6.56097	-0.000164831			6.55529	0.000405693			7.7281	0.000255249			12.2605	0.335159
	6.56711	-0.00017454			6.56143	0.000376085			7.73424	0.000241794			12.2666	0.329436
	6.57325	-0.000184116			6.56757	0.000351212			7.74038	0.00022834			12.2728	0.323854
	6.57939	-0.000183832			6.57371	0.000340569			7.74652	0.000173317			12.2789	0.318402
	6.58553	-0.000182765			6.57985	0.000331005			7.75266	0.000142078			12.285	0.312811
	6.59167	-0.000182535			6.58599	0.000321569			7.7588	0.000150521			12.2912	0.30716
	6.59781	-0.000182436			6.59213	0.000305076			7.76495	0.000151173			12.2973	0.301771
	6.60395	-0.000182337			6.59827	0.000279988			7.77109	0.000146644			12.3035	0.296553
	6.61009	-0.000177931			6.60441	0.000268574			7.77723	0.000141817			12.3096	0.291415
	6.61623	-0.000173287			6.61055	0.00025605			7.78337	0.00013699			12.3158	0.286472
	6.62237	-0.000174513			6.61669	0.000233357			7.78951	0.00017299			12.3219	0.281502
	6.62851	-0.000175739			6.62283	0.000201983			7.79565	0.000205884			12.328	0.276441
	6.63465	-0.000179129			6.62897	0.000160785			7.80179	0.000207827			12.3342	0.271463
	6.64079	-0.000184541			6.63511	0.000123637			7.80793	0.000197689			12.3403	0.266584
	6.64693	-0.000182943			6.64125	0.000101906			7.81407	0.000187552			12.3465	0.261873
	6.65307	-0.000177693			6.64739	8.40922e-05			7.82021	0.000163751			12.3526	0.257138
	6.65921	-0.000173234			6.65353	6.7837e-05			7.82635	0.000191399			12.3587	0.252267
	6.66535	-0.000171103			6.65967	4.8782e-05			7.83249	0.000229633			12.3649	0.247556
	6.6715	-0.000168973			6.66581	2.33028e-05			7.83863	0.000260281			12.371	0.243065
	6.67764	-0.000167887			6.67195	8.98254e-06			7.84477	0.000298369			12.3772	0.238724
	6.68378	-0.000155444			6.67809	1.00399e-05			7.85091	0.000327511			12.3833	0.234603
	6.68992	-0.000147547			6.68423	3.33621e-06			7.85705	0.000362846			12.3894	0.230475
	6.69606	-0.000148528			6.69038	-1.81312e-05			7.86319	0.000423259			12.3956	0.226121
	6.7022	-0.000149509			6.69652	-5.01078e-05			7.86933	0.000477919			12.4017	0.221751
	6.70834	-0.000152043			6.70266	-7.61758e-05			7.87547	0.000478969			12.4079	0.217519
	6.71448	-0.000152965			6.7088	-9.00598e-05			7.88161	0.000472663			12.414	0.213476
	6.72062	-0.000151275			6.71494	-0.000105659			7.88775	0.000466356			12.4201	0.209535
	6.72676	-0.000146943			6.72108	-0.000112183			7.89389	0.00045905			12.4263	0.205481
	6.7329	-0.000146265			6.72722	-0.00012301			7.90003	0.000506701			12.4324	0.201467
	6.73904	-0.000145588			6.73336	-0.000147958			7.90617	0.000556326			12.4386	0.197186
	6.74518	-0.000142946			6.7395	-0.000159499			7.91231	0.00058738			12.4447	0.193004
	6.75132	-0.00013808			6.74564	-0.000158714			7.91846	0.000596116			12.4508	0.189419
	6.75746	-0.000137215			6.75178	-0.000157929			7.9246	0.000609183			12.457	0.185872
	6.7636	-0.000136755			6.75792	-0.000170489			7.93074	0.00064686			12.4631	0.182271
	6.76974	-0.00014108			6.76406	-0.000189297			7.93688	0.000657825			12.4693	0.178719
	6.77588	-0.000145405			6.7702	-0.000223428			7.94302	0.000659607			12.4754	0.175249
	6.78202	-0.000155174			6.77634	-0.000258637			7.94916	0.000635141			12.4815	0.171869
	6.78816	-0.0001551			6.78248	-0.000272173			7.9553	0.000610675			12.4877	0.168597
	6.7943	-0.000155027			6.78862	-0.000279631			7.96144	0.00057251			12.4938	0.16531
	6.80044	-0.000155665			6.79476	-0.000295711			7.96758	0.000561989			12.5	0.161971
	6.80658	-0.000161221			6.8009	-0.000317556			7.97372	0.000553248			12.5061	0.158761
	6.81272	-0.000165572			6.80704	-0.000334306			7.97986	0.000545054			12.5122	0.155697
	6.81886	-0.000163831			6.81318	-0.000335904			7.986	0.000532157			12.5184	0.152764
	6.82501	-0.000160807			6.81932	-0.000345043			7.99214	0.000513138			12.5245	0.149958
	6.83115	-0.000160278			6.82546	-0.000362491			7.99828	0.000509553			12.5307	0.147122
	6.83729	-0.000162062			6.8316	-0.000381387			8.00442	0.000502092			12.5368	0.144236
	6.84343	-0.000163845			6.83774	-0.000413468			8.01056	0.00049463			12.5429	0.141391
	6.84957	-0.000173526			6.84389	-0.000436629			8.0167	0.000479316			12.5491	0.138603
	6.85571	-0.00017993			6.85003	-0.000449098			8.02284	0.000436724			12.5552	0.135944
	6.86185	-0.000178535			6.85617	-0.000461442			8.02898	0.000379139			12.5614	0.133323
	6.86799	-0.00017654			6.86231	-0.000468863			8.03512	0.000375426			12.5675	0.130607
	6.87413	-0.000175481			6.86845	-0.000480886			8.04126	0.00038947			12.5736	0.127948
	6.88027	-0.000174421			6.87459	-0.000491138			8.0474	0.000411118			12.5798	0.125442
	6.88641	-0.000172516			6.88073	-0.000495369			8.05354	0.000413829			12.5859	0.123023
	6.89255	-0.000166947			6.88687	-0.000493342			8.05968	0.000412545			12.5921	0.120691
	6.89869	-0.000160291			6.89301	-0.000492179			8.06582	0.000411262			12.5982	0.118328
	6.90483	-0.000160289			6.89915	-0.000495882			8.07197	0.000445099			12.6043	0.115925
	6.91097	-0.000160288			6.90529	-0.000506874			8.07811	0.000443219			12.6105	0.113606
	6.91711	-0.000162658			6.91143	-0.000535121			8.08425	0.000439584			12.6166	0.111317
	6.92325	-0.000166528			6.91757	-0.000553888			8.09039	0.000411853			12.6228	0.108976
	6.92939	-0.000161431			6.92371	-0.000554377			8.09653	0.000384123			12.6289	0.106754
	6.93553	-0.000158152			6.92985	-0.000551323			8.10267	0.000339922			12.6351	0.104639
	6.94167	-0.000153987			6.93599	-0.000548268			8.10881	0.000348665			12.6412	0.102498
	6.94781	-0.0001507			6.94213	-0.000563909			8.11495	0.000345315			12.6473	0.100455
	6.95395	-0.000148589			6.94827	-0.000562971			8.12109	0.000338331			12.6535	0.0985028
	6.96009	-0.000138084			6.95441	-0.000555982			8.12723	0.000331346			12.6596	0.0966484
	6.96623	-0.000127997			6.96055	-0.000555382			8.13337	0.000300852			12.6658	0.0947807
	6.97237	-0.000124606			6.96669	-0.000554782			8.13951	0.000311909			12.6719	0.0928138
	6.97852	-0.000123161			6.97283	-0.000557276			8.14565	0.000330598			12.678	0.09092
	6.98466	-0.000123901			6.97897	-0.000582898			8.15179	0.000324495			12.6842	0.0889947
	6.9908	-0.000124642			6.98511	-0.00060743			8.15793	0.000318393			12.6903	0.087076
	6.99694	-0.000121181			6.99125	-0.000612519			8.16407	0.000294272			12.6965	0.0853683
	7.00308	-0.000115716			6.9974	-0.000611147			8.17021	0.000244991			12.7026	0.0837279
	7.00922	-0.000108946			7.00354	-0.000615089			8.17635	0.000230334			12.7087	0.0820505
	7.01536	-0.000107709			7.00968	-0.000612271			8.18249	0.000221083			12.7149	0.0804123
	7.0215	-0.000106471			7.01582	-0.000615271			8.18863	0.000211127			12.721	0.0788701
	7.02764	-0.000104403			7.02196	-0.000619534			8.19477	0.000194644			12.7272	0.0773789
	7.03378	-9.50161e-05			7.0281	-0.000614621			8.20091	0.000151504			12.7333	0.0759569
	7.03992	-9.48993e-05			7.03424	-0.000610638			8.20705	0.000137556			12.7394	0.0745668
	7.04606	-9.47825e-05			7.04038	-0.000618174			8.21319	0.000176241			12.7456	0.0731481
	7.0522	-9.64029e-05			7.04652	-0.00062571			8.21933	0.000183751			12.7517	0.0717396
	7.05834	-9.96504e-05			7.05266	-0.000644655			8.22548	0.000183402			12.7579	0.0703559
	7.06448	-0.000103571			7.0588	-0.000654284			8.23162	0.000163477			12.764	0.0690346
	7.07062	-0.000104148			7.06494	-0.000651743			8.23776	0.000143552			12.7701	0.0677673
	7.07676	-9.99782e-05			7.07108	-0.000649201			8.2439	0.000119098			12.7763	0.0664783
	7.0829	-9.2993e-05			7.07722	-0.000649189			8.25004	0.000125269			12.7824	0.0651998
	7.08904	-8.97248e-05			7.08336	-0.000665583			8.25618	0.00017118			12.7886	0.0639815
	7.09518	-8.80965e-05			7.0895	-0.000668166			8.26232	0.000169962			12.7947	0.0628025
	7.10132	-8.11714e-05			7.09564	-0.000666244			8.26846	0.000168744			12.8008	0.0616919
	7.10746	-7.42541e-05			7.10178	-0.000664322			8.2746	0.000184415			12.807	0.0606308
	7.1136	-7.28325e-05			7.10792	-0.000665453			8.28074	0.000224615			12.8131	0.059551
	7.11974	-7.26963e-05			7.11406	-0.000676895			8.28688	0.000221837			12.8193	0.0584648
	7.12588	-7.256e-05			7.1202	-0.000703996			8.29302	0.00021649			12.8254	0.0574096
	7.13203	-7.98718e-05			7.12634	-0.000727587			8.29916	0.000211142			12.8315	0.0563819
	7.13817	-7.78335e-05			7.13248	-0.000731329			8.3053	0.000171143			12.8377	0.0553898
	7.14431	-7.02618e-05			7.13862	-0.000729727			8.31144	0.000118756			12.8438	0.0544151
	7.15045	-6.71883e-05			7.14476	-0.000733411			8.31758	0.000103692			12.85	0.0534363
	7.15659	-6.68374e-05			7.15091	-0.000740593			8.32372	0.000109772			12.8561	0.0524881
	7.16273	-6.64866e-05			7.15705	-0.000745537			8.32986	0.000109024			12.8622	0.0515877
	7.16887	-6.49059e-05			7.16319	-0.00073551			8.336	9.86056e-05			12.8684	0.0507175
	7.17501	-5.6536e-05			7.16933	-0.000730236			8.34214	8.81874e-05			12.8745	0.0498843
	7.18115	-5.33618e-05			7.17547	-0.000726679			8.34828	0.000102575			12.8807	0.0490673
	7.18729	-5.30793e-05			7.18161	-0.00073375			8.35442	0.00010526			12.8868	0.0482402
	7.19343	-5.54757e-05			7.18775	-0.00074082			8.36056	0.000100863			12.8929	0.0474266
	7.19957	-5.78722e-05			7.19389	-0.000749446			8.3667	7.23063e-05			12.8991	0.0466317
	7.20571	-5.64276e-05			7.20003	-0.000742179			8.37284	4.37497e-05			12.9052	0.0458728
	7.21185	-5.33714e-05			7.20617	-0.000737102			8.37899	7.679e-06			12.9114	0.0451383
	7.21799	-4.94586e-05			7.21231	-0.0007313			8.38513	-1.8082e-06			12.9175	0.0444005
	7.22413	-4.84259e-05			7.21845	-0.000726932			8.39127	-8.32795e-06			12.9236	0.0436788
	7.23027	-4.73932e-05			7.22459	-0.000722563			8.39741	-1.52741e-05			12.9298	0.042987
	7.23641	-4.50488e-05			7.23073	-0.000717621			8.40355	-2.22203e-05			12.9359	0.0423146
	7.24255	-3.52855e-05			7.23687	-0.000698824			8.40969	-3.23704e-05			12.9421	0.0416754
	7.24869	-3.19083e-05			7.24301	-0.000690629			8.41583	-1.04948e-05			12.9482	0.0410607
	7.25483	-3.0463e-05			7.24915	-0.000688201			8.42197	4.34537e-05			12.9544	0.0404461
	7.26097	-3.31569e-05			7.25529	-0.000685772			8.42811	8.36256e-05			12.9605	0.0398287
	7.26711	-3.58508e-05			7.26143	-0.000699914			8.43425	8.05466e-05			12.9666	0.039226
	7.27325	-4.2141e-05			7.26757	-0.000703857			8.44039	8.42958e-05			12.9728	0.0386475
	7.27939	-4.34375e-05			7.27371	-0.000701528			8.44653	8.04503e-05			12.9789	0.0380922
	7.28554	-4.33617e-05			7.27985	-0.000699508			8.45267	7.66048e-05			12.9851	0.0375381
	7.29168	-4.31753e-05			7.28599	-0.000699718			8.45881	9.4444e-05			12.9912	0.0369873
	7.29782	-4.29889e-05			7.29213	-0.000699928			8.46495	0.000121002			12.9973	0.0364584
	7.30396	-4.36435e-05			7.29827	-0.000703311			8.47109	0.00015799			13.0035	0.0359433
	7.3101	-3.98439e-05			7.30442	-0.000694241			8.47723	0.000170596			13.0096	0.0354509
	7.31624	-3.77647e-05			7.31056	-0.000689475			8.48337	0.000174784			13.0158	0.0349859
	7.32238	-3.77673e-05			7.3167	-0.000687266			8.48951	0.000207329			13.0219	0.0345255
	7.32852	-3.777e-05			7.32284	-0.000685057			8.49565	0.00025028			13.028	0.0340689
	7.33466	-4.13596e-05			7.32898	-0.000700814			8.50179	0.000275451			13.0342	0.0336209
	7.3408	-4.85764e-05			7.33512	-0.000713996			8.50793	0.000262025			13.0403	0.0331733
	7.34694	-4.92042e-05			7.34126	-0.00070882			8.51407	0.0002486			13.0465	0.0327424
	7.35308	-4.85599e-05			7.3474	-0.000706505			8.52021	0.000223774			13.0526	0.0323336
	7.35922	-4.45088e-05			7.35354	-0.000704191			8.52635	0.000232466			13.0587	0.0319265
	7.36536	-3.96123e-05			7.35968	-0.000702781			8.5325	0.000249343			13.0649	0.0315233
	7.3715	-3.79404e-05			7.36582	-0.000700808			8.53864	0.000250972			13.071	0.0311315
	7.37764	-3.66727e-05			7.37196	-0.000686265			8.54478	0.000252636			13.0772	0.0307403
	7.38378	-2.73618e-05			7.3781	-0.000671577			8.55092	0.000253104			13.0833	0.030373
	7.38992	-1.61045e-05			7.38424	-0.000671057			8.55706	0.000255861			13.0894	0.0300271
	7.39606	-1.67136e-05			7.39038	-0.000670537			8.5632	0.00027149			13.0956	0.0296865
	7.4022	-1.73227e-05			7.39652	-0.000673902			8.56934	0.000264123			13.1017	0.0293447
	7.40834	-2.00364e-05			7.40266	-0.000685543			8.57548	0.000256755			13.1079	0.0290069
	7.41448	-2.33466e-05			7.4088	-0.00068356			8.58162	0.000239294			13.114	0.0286808
	7.42062	-2.20947e-05			7.41494	-0.000677198			8.58776	0.000191717			13.1201	0.0283682
	7.42676	-1.94294e-05			7.42108	-0.000671769			8.5939	0.000157325			13.1263	0.0280624
	7.4329	-1.82295e-05			7.42722	-0.000666673			8.60004	0.000141633			13.1324	0.0277575
	7.43905	-1.70296e-05			7.43336	-0.000662874			8.60618	0.000131398			13.1386	0.027467
	7.44519	-1.44119e-05			7.4395	-0.000659076			8.61232	0.000121162			13.1447	0.0271791
	7.45133	-9.08373e-06			7.44564	-0.000645581			8.61846	0.000100965			13.1508	0.0268882
	7.45747	-6.4281e-06			7.45178	-0.000629108			8.6246	9.47097e-05			13.157	0.026618
	7.46361	-7.10437e-06			7.45793	-0.00063004			8.63074	0.000134262			13.1631	0.0263559
	7.46975	-7.78064e-06			7.46407	-0.000630973			8.63688	0.000133711			13.1693	0.0260965
	7.47589	-9.94367e-06			7.47021	-0.000636764			8.64302	0.000129425			13.1754	0.0258464
	7.48203	-1.80836e-05			7.47635	-0.00064372			8.64916	0.000123273			13.1815	0.0255867
	7.48817	-1.83594e-05			7.48249	-0.000633951			8.6553	0.000117121			13.1877	0.0253418
	7.49431	-1.43957e-05			7.48863	-0.000618477			8.66144	6.15238e-05			13.1938	0.0251137
	7.50045	-1.08401e-05			7.49477	-0.000614484			8.66758	7.39273e-05			13.2	0.0248793
	7.50659	-1.05909e-05			7.50091	-0.000611333			8.67372	0.000102509			13.2061	0.0246553
	7.51273	-1.03418e-05			7.50705	-0.000608182			8.67986	0.000127824			13.2122	0.0244373
	7.51887	-6.68401e-06			7.51319	-0.000596118			8.68601	0.000152755			13.2184	0.0242152
	7.52501	3.393e-06			7.51933	-0.000581648			8.69215	0.000157526			13.2245	0.0239949
	7.53115	1.31696e-05			7.52547	-0.000580312			8.69829	0.000195083			13.2307	0.0237843
	7.53729	1.29891e-05			7.53161	-0.000578977			8.70443	0.00023625			13.2368	0.0235831
	7.54343	1.28085e-05			7.53775	-0.000583493			8.71057	0.000269739			13.243	0.0233851
	7.54957	1.19198e-05			7.54389	-0.000599606			8.71671	0.000267424			13.2491	0.0231837
	7.55571	1.14186e-05			7.55003	-0.0006012			8.72285	0.000263132			13.2552	0.0229864
	7.56185	1.54429e-05			7.55617	-0.000593698			8.72899	0.000258839			13.2614	0.0228058
	7.56799	2.60649e-05			7.56231	-0.000588373			8.73513	0.000278763			13.2675	0.0226266
	7.57413	3.64684e-05			7.56845	-0.000584538			8.74127	0.000309076			13.2737	0.0224516
	7.58027	3.75687e-05			7.57459	-0.000580702			8.74741	0.000338522			13.2798	0.0222777
	7.58641	3.88151e-05			7.58073	-0.000577361			8.75355	0.000375612			13.2859	0.0220914
	7.59256	5.08816e-05			7.58687	-0.000568951			8.75969	0.000393105			13.2921	0.0219081
	7.5987	6.1126e-05			7.59301	-0.000563384			8.76583	0.000396563			13.2982	0.0217391
	7.60484	6.17315e-05			7.59915	-0.000562467			8.77197	0.000450739			13.3044	0.0215792
	7.61098	6.20304e-05			7.60529	-0.00056155			8.77811	0.00050299			13.3105	0.0214251
	7.61712	6.05687e-05			7.61144	-0.000577553			8.78425	0.000504404			13.3166	0.0212715
	7.62326	5.91069e-05			7.61758	-0.000596718			8.79039	0.000500591			13.3228	0.0211169
	7.6294	6.1777e-05			7.62372	-0.000589327			8.79653	0.000486952			13.3289	0.0209622
	7.63554	6.55628e-05			7.62986	-0.000580163			8.80267	0.000473314			13.3351	0.0208169
	7.64168	7.25297e-05			7.636	-0.000575436			8.80881	0.000505219			13.3412	0.0206823
	7.64782	7.38633e-05			7.64214	-0.000572565			8.81495	0.000526658			13.3473	0.0205415
	7.65396	7.42593e-05			7.64828	-0.000569694			8.82109	0.00054665			13.3535	0.0203983
	7.6601	8.0286e-05			7.65442	-0.000549943			8.82723	0.000566448			13.3596	0.020248
	7.66624	8.8302e-05			7.66056	-0.00054005			8.83337	0.000582049			13.3658	0.0201063
	7.67238	8.99731e-05			7.6667	-0.000534089			8.83952	0.000628483			13.3719	0.0199847
	7.67852	8.98233e-05			7.67284	-0.000535385			8.84566	0.000686453			13.378	0.0198619
	7.68466	8.96735e-05			7.67898	-0.000536681			8.8518	0.000740076			13.3842	0.0197434
	7.6908	8.24489e-05			7.68512	-0.000548431			8.85794	0.000763661			13.3903	0.0196282
	7.69694	8.11755e-05			7.69126	-0.000542439			8.86408	0.000768955			13.3965	0.0195159
	7.70308	7.74179e-05			7.6974	-0.000532155			8.87022	0.000770482			13.4026	0.0194161
	7.70922	7.83457e-05			7.70354	-0.000525606			8.87636	0.000800703			13.4087	0.0193141
	7.71536	7.86614e-05			7.70968	-0.000521469			8.8825	0.000865381			13.4149	0.0192056
	7.7215	7.89772e-05			7.71582	-0.000517332			8.88864	0.000920781			13.421	0.0191071
	7.72764	7.98923e-05			7.72196	-0.000504419			8.89478	0.000971802			13.4272	0.0190062
	7.73378	8.65032e-05			7.7281	-0.000495842			8.90092	0.00100046			13.4333	0.0188925
	7.73992	8.692e-05			7.73424	-0.000492846			8.90706	0.00102865			13.4394	0.0187958
	7.74607	8.62232e-05			7.74038	-0.00048985			8.9132	0.00110013			13.4456	0.018716
	7.75221	8.55264e-05			7.74652	-0.00048963			8.91934	0.00115081			13.4517	0.0186347
	7.75835	8.21521e-05			7.75266	-0.000505595			8.92548	0.00116855			13.4579	0.0185517
	7.76449	7.83121e-05			7.7588	-0.000503759			8.93162	0.00116094			13.464	0.018456
	7.77063	7.82342e-05			7.76495	-0.000500755			8.93776	0.00115334			13.4701	0.018369
	7.77677	8.03433e-05			7.77109	-0.00049775			8.9439	0.00114242			13.4763	0.0183008
	7.78291	8.42819e-05			7.77723	-0.00049529			8.95004	0.001176			13.4824	0.0182321
	7.78905	8.49327e-05			7.78337	-0.00049283			8.95618	0.00121675			13.4886	0.0181495
	7.79519	8.55835e-05			7.78951	-0.000498449			8.96232	0.00123202			13.4947	0.0180573
	7.80133	9.09204e-05			7.79565	-0.000489207			8.96846	0.0012443			13.5008	0.0179571
	7.80747	9.57694e-05			7.80179	-0.000469876			8.9746	0.00127228			13.507	0.0178581
	7.81361	9.87451e-05			7.80793	-0.000469595			8.98074	0.00133211			13.5131	0.017781
	7.81975	9.67332e-05			7.81407	-0.000469313			8.98688	0.00137009			13.5193	0.017711
	7.82589	9.47212e-05			7.82021	-0.000471962			8.99303	0.00136993			13.5254	0.0176444
	7.83203	9.02134e-05			7.82635	-0.000484452			8.99917	0.00137249			13.5315	0.0175764
	7.83817	9.21739e-05			7.83249	-0.000481751			9.00531	0.0013673			13.5377	0.0175039
	7.84431	9.51136e-05			7.83863	-0.000473898			9.01145	0.0013621			13.5438	0.0174383
	7.85045	9.65262e-05			7.84477	-0.000465941			9.01759	0.00139667			13.55	0.0173795
	7.85659	9.61556e-05			7.85091	-0.000461813			9.02373	0.00146871			13.5561	0.0173191
	7.86273	9.5785e-05			7.85705	-0.000457685			9.02987	0.00150876			13.5623	0.017257
	7.86887	9.76555e-05			7.86319	-0.000445842			9.03601	0.0015374			13.5684	0.0171887
	7.87501	0.000102704			7.86933	-0.000425737			9.04215	0.00158521			13.5745	0.0171159
	7.88115	0.000105144			7.87547	-0.000419018			9.04829	0.00164236			13.5807	0.0170551
	7.88729	0.000106202			7.88161	-0.000416039			9.05443	0.00172753			13.5868	0.0170098
	7.89343	0.000103409			7.88775	-0.00041306			9.06057	0.00180892			13.593	0.0169624
	7.89958	0.000100616			7.89389	-0.000428777			9.06671	0.0018566			13.5991	0.016905
	7.90572	9.75999e-05			7.90003	-0.000421615			9.07285	0.00188593			13.6052	0.0168533
	7.91186	9.79474e-05			7.90617	-0.000406386			9.07899	0.00190152			13.6114	0.0168039
	7.918	0.000101447			7.91231	-0.000392822			9.08513	0.00196364			13.6175	0.016755
	7.92414	0.000108576			7.91846	-0.000383681			9.09127	0.00205439			13.6237	0.0167104
	7.93028	0.000111932			7.9246	-0.00037766			9.09741	0.00212089			13.6298	0.0166609
	7.93642	0.000112193			7.93074	-0.000371638			9.10355	0.00220272			13.6359	0.0165993
	7.94256	0.000118726			7.93688	-0.000343317			9.10969	0.00227944			13.6421	0.0165297
	7.9487	0.00012261			7.94302	-0.000331938			9.11583	0.00234485			13.6482	0.0164742
	7.95484	0.000121936			7.94916	-0.000326759			9.12197	0.00244597			13.6544	0.0164369
	7.96098	0.000121263			7.9553	-0.00032835			9.12811	0.00255714			13.6605	0.0163975
	7.96712	0.000118536			7.96144	-0.000329941			9.13425	0.00261792			13.6666	0.0163513
	7.97326	0.000110555			7.96758	-0.000333018			9.14039	0.00264473			13.6728	0.0163078
	7.9794	0.000113211			7.97372	-0.000326352			9.14654	0.0026622			13.6789	0.0162668
	7.98554	0.000114603			7.97986	-0.000316487			9.15268	0.00267773			13.6851	0.0162383
	7.99168	0.000115152			7.986	-0.00031015			9.15882	0.00272694			13.6912	0.01622
	7.99782	0.000113418			7.99214	-0.000308113			9.16496	0.00278449			13.6973	0.0161901
	8.00396	0.000111683			7.99828	-0.000306077			9.1711	0.0028233			13.7035	0.0161467
	8.0101	0.000112704			8.00442	-0.000289775			9.17724	0.00286534			13.7096	0.0161001
	8.01624	0.000114512			8.01056	-0.000280263			9.18338	0.00289592			13.7158	0.0160615
	8.02238	0.000114929			8.0167	-0.00027606			9.18952	0.00296011			13.7219	0.0160284
	8.02852	0.000109539			8.02284	-0.000276115			9.19566	0.00304469			13.728	0.0160007
	8.03466	0.000104149			8.02898	-0.000276169			9.2018	0.0030951			13.7342	0.0159783
	8.0408	9.04896e-05			8.03512	-0.000285114			9.20794	0.00313191			13.7403	0.0159458
	8.04694	8.33529e-05			8.04126	-0.00027956			9.21408	0.00313066			13.7465	0.0159096
	8.05309	8.16548e-05			8.0474	-0.000271748			9.22022	0.00312941			13.7526	0.0158874
	8.05923	8.02262e-05			8.05354	-0.000267561			9.22636	0.00315376			13.7587	0.0158671
	8.06537	7.87975e-05			8.05968	-0.000265692			9.2325	0.00322028			13.7649	0.0158394
	8.07151	7.21858e-05			8.06582	-0.000263823			9.23864	0.00327946			13.771	0.0158118
	8.07765	6.41425e-05			8.07197	-0.000257098			9.24478	0.0033411			13.7772	0.0157778
	8.08379	6.41945e-05			8.07811	-0.00024181			9.25092	0.00336944			13.7833	0.0157281
	8.08993	6.25083e-05			8.08425	-0.000233196			9.25706	0.00341574			13.7894	0.0156862
	8.09607	6.08222e-05			8.09039	-0.000230703			9.2632	0.00349836			13.7956	0.0156648
	8.10221	5.667e-05			8.09653	-0.00022821			9.26934	0.00358332			13.8017	0.0156421
	8.10835	4.86304e-05			8.10267	-0.000233528			9.27548	0.00366314			13.8079	0.0156146
	8.11449	4.55427e-05			8.10881	-0.000234221			9.28162	0.00370468			13.814	0.0155821
	8.12063	4.53523e-05			8.11495	-0.000231215			9.28776	0.00372662			13.8201	0.0155545
	8.12677	4.65312e-05			8.12109	-0.000217292			9.2939	0.00375989			13.8263	0.015539
	8.13291	4.70715e-05			8.12723	-0.000201705			9.30005	0.00383242			13.8324	0.0155168
	8.13905	4.64505e-05			8.13337	-0.000195824			9.30619	0.00393484			13.8386	0.0154828
	8.14519	4.58296e-05			8.13951	-0.000189514			9.31233	0.00401216			13.8447	0.015442
	8.15133	4.902e-05			8.14565	-0.000168906			9.31847	0.00408197			13.8508	0.015391
	8.15747	4.96876e-05			8.15179	-0.000163242			9.32461	0.00415309			13.857	0.0153481
	8.16361	4.97771e-05			8.15793	-0.00016131			9.33075	0.00427189			13.8631	0.0153208
	8.16975	4.98667e-05			8.16407	-0.000159379			9.33689	0.00440246			13.8693	0.0152974
	8.17589	3.89185e-05			8.17021	-0.000161179			9.34303	0.0044772			13.8754	0.0152782
	8.18203	2.14418e-05			8.17635	-0.000174344			9.34917	0.00454642			13.8816	0.0152504
	8.18817	1.49529e-05			8.18249	-0.000166799			9.35531	0.00460304			13.8877	0.0152211
	8.19431	1.49027e-05			8.18863	-0.000160141			9.36145	0.00466129			13.8938	0.0152027
	8.20045	9.23404e-06			8.19477	-0.000155585			9.36759	0.00475299			13.9	0.0151906
	8.2066	5.02827e-06			8.20091	-0.000154064			9.37373	0.00486041			13.9061	0.0151657
	8.21274	-1.73823e-06			8.20705	-0.000152542			9.37987	0.00498105			13.9123	0.0151412
	8.21888	-6.28501e-06			8.21319	-0.000145567			9.38601	0.00509268			13.9184	0.0151142
	8.22502	-7.87126e-06			8.21933	-0.000136665			9.39215	0.00520086			13.9245	0.0150727
	8.23116	-9.45752e-06			8.22548	-0.000130645			9.39829	0.00532443			13.9307	0.0150522
	8.2373	-1.29035e-05			8.23162	-0.000128491			9.40443	0.00547712			13.9368	0.015039
	8.24344	-2.52321e-05			8.23776	-0.000126337			9.41057	0.00563345			13.943	0.0150216
	8.24958	-3.57842e-05			8.2439	-0.000138722			9.41671	0.00578407			13.9491	0.0150045
	8.25572	-4.27483e-05			8.25004	-0.000142093			9.42285	0.00590631			13.9552	0.0149815
	8.26186	-4.6993e-05			8.25618	-0.000144288			9.42899	0.00601397			13.9614	0.01497
	8.268	-4.85123e-05			8.26232	-0.000143077			9.43513	0.00615544			13.9675	0.0149623
	8.27414	-5.17707e-05			8.26846	-0.000141422			9.44127	0.00630792			13.9737	0.0149522
	8.28028	-5.89251e-05			8.2746	-0.000139767			9.44741	0.00647934			13.9798	0.0149402
	8.28642	-6.34157e-05			8.28074	-0.00014213			9.45356	0.00667319			13.9859	0.0149135
	8.29256	-6.3238e-05			8.28688	-0.000132823			9.4597	0.00685077			13.9921	0.0148776
	8.2987	-6.30604e-05			8.29302	-0.000129472			9.46584	0.00701941			13.9982	0.0148516
	8.30484	-6.48282e-05			8.29916	-0.000127688			9.47198	0.00724859			14.0044	0.0148338
	8.31098	-6.65961e-05			8.3053	-0.000125903			9.47812	0.00748242			14.0105	0.0148252
	8.31712	-7.06297e-05			8.31144	-0.000139616			9.48426	0.00766987			14.0166	0.0148155
	8.32326	-8.30712e-05			8.31758	-0.000159817			9.4904	0.00786158			14.0228	0.0147918
	8.3294	-8.90042e-05			8.32372	-0.000161808			9.49654	0.00802703			14.0289	0.014766
	8.33554	-8.82017e-05			8.32986	-0.000153334			9.50268	0.00818642			14.0351	0.0147523
	8.34168	-8.83228e-05			8.336	-0.000148486			9.50882	0.00838697			14.0412	0.0147477
	8.34782	-8.84439e-05			8.34214	-0.000143639			9.51496	0.00862228			14.0473	0.0147414
	8.35396	-9.0032e-05			8.34828	-0.000140155			9.5211	0.00887273			14.0535	0.0147248
	8.36011	-8.75691e-05			8.35442	-0.000122513			9.52724	0.00908843			14.0596	0.0147051
	8.36625	-8.53108e-05			8.36056	-0.000111366			9.53338	0.00932045			14.0658	0.0146851
	8.37239	-8.43085e-05			8.3667	-0.000104569			9.53952	0.00959755			14.0719	0.0146696
	8.37853	-8.70388e-05			8.37284	-0.00010879			9.54566	0.00988068			14.078	0.0146662
	8.38467	-8.97691e-05			8.37899	-0.000113012			9.5518	0.0101524			14.0842	0.0146627
	8.39081	-0.000101362			8.38513	-0.000131295			9.55794	0.0104126			14.0903	0.0146662
	8.39695	-0.000108262			8.39127	-0.000125624			9.56408	0.0106435			14.0965	0.0146678
	8.40309	-0.000108125			8.39741	-0.00012115			9.57022	0.0108562			14.1026	0.0146694
	8.40923	-0.000107988			8.40355	-0.000118582			9.57636	0.0111085			14.1087	0.0146849
	8.41537	-0.000108422			8.40969	-0.000116014			9.5825	0.011391			14.1149	0.0146912
	8.42151	-0.000110695			8.41583	-0.000114659			9.58864	0.0116779			14.121	0.0146906
	8.42765	-0.000112639			8.42197	-0.000108144			9.59478	0.0119805			14.1272	0.0146901
	8.43379	-0.000112467			8.42811	-9.82435e-05			9.60092	0.0122613			14.1333	0.0146857
	8.43993	-0.000112296			8.43425	-9.47776e-05			9.60707	0.0125637			14.1394	0.0146749
	8.44607	-0.000113653			8.44039	-9.40634e-05			9.61321	0.0129333			14.1456	0.014668
	8.45221	-0.000117805			8.44653	-9.33492e-05			9.61935	0.0132938			14.1517	0.0146697
	8.45835	-0.000124925			8.45267	-0.000110487			9.62549	0.0136142			14.1579	0.0146709
	8.46449	-0.000132797			8.45881	-0.000116833			9.63163	0.0139105			14.164	0.0146721
	8.47063	-0.000132085			8.46495	-0.000115207			9.63777	0.0141952			14.1702	0.0146657
	8.47677	-0.000131362			8.47109	-0.000113914			9.64391	0.0144956			14.1763	0.0146646
	8.48291	-0.000131458			8.47723	-0.00011262			9.65005	0.0148293			14.1824	0.0146645
	8.48905	-0.000131554			8.48337	-0.000113838			9.65619	0.0152009			14.1886	0.0146643
	8.49519	-0.000134285			8.48951	-0.00012068			9.66233	0.0156078			14.1947	0.0146592
	8.50133	-0.000132267			8.49565	-0.000108136			9.66847	0.0159769			14.2009	0.0146422
	8.50747	-0.000131506			8.50179	-9.67245e-05			9.67461	0.0163126			14.207	0.014634
	8.51362	-0.000131247			8.50793	-9.71912e-05			9.68075	0.01673			14.2131	0.0146259
	8.51976	-0.00013589			8.51407	-9.7658e-05			9.68689	0.0171841			14.2193	0.0146284
	8.5259	-0.000140532			8.52021	-0.000101788			9.69303	0.0175928			14.2254	0.0146317
	8.53204	-0.000150881			8.52635	-0.00012201			9.69917	0.0179899			14.2316	0.0146336
	8.53818	-0.000153063			8.5325	-0.000121685			9.70531	0.018342			14.2377	0.0146356
	8.54432	-0.000153168			8.53864	-0.000113747			9.71145	0.0186787			14.2438	0.0146515
	8.55046	-0.000154624			8.54478	-0.000109725			9.71759	0.0190826			14.25	0.0146722
	8.5566	-0.000155409			8.55092	-0.000107526			9.72373	0.0195204			14.2561	0.0146838
	8.56274	-0.000159951			8.55706	-0.000105326			9.72987	0.0199398			14.2623	0.0146855
	8.56888	-0.000162544			8.5632	-9.45937e-05			9.73601	0.0203622			14.2684	0.0146848
	8.57502	-0.000158868			8.56934	-9.04497e-05			9.74215	0.0207838			14.2745	0.014684
	8.58116	-0.000160128			8.57548	-8.7991e-05			9.74829	0.0212143			14.2807	0.01468
	8.5873	-0.000161388			8.58162	-8.55323e-05			9.75443	0.021687			14.2868	0.014701
	8.59344	-0.000164941			8.58776	-0.000102428			9.76058	0.0221702			14.293	0.0147169
	8.59958	-0.000173513			8.5939	-0.000124543			9.76672	0.0226403			14.2991	0.0147209
	8.60572	-0.000178994			8.60004	-0.000127795			9.77286	0.0230626			14.3052	0.0147229
	8.61186	-0.000178726			8.60618	-0.00012948			9.779	0.0234465			14.3114	0.0147283
	8.618	-0.000178144			8.61232	-0.000136749			9.78514	0.0238595			14.3175	0.0147454
	8.62414	-0.00017819			8.61846	-0.000134395			9.79128	0.0243011			14.3237	0.0147613
	8.63028	-0.000178237			8.6246	-0.000140524			9.79742	0.0247651			14.3298	0.014778
	8.63642	-0.000181557			8.63074	-0.000156844			9.80356	0.0252465			14.3359	0.014782
	8.64256	-0.000175687			8.63688	-0.000156397			9.8097	0.0256884			14.3421	0.014786
	8.6487	-0.000168596			8.64302	-0.000155949			9.81584	0.0261228			14.3482	0.0147879
	8.65484	-0.000170083			8.64916	-0.000158497			9.82198	0.0266247			14.3544	0.0148042
	8.66098	-0.000171569			8.6553	-0.000171343			9.82812	0.027118			14.3605	0.0148201
	8.66713	-0.000176455			8.66144	-0.000184734			9.83426	0.0275521			14.3666	0.0148476
	8.67327	-0.000186008			8.66758	-0.000199031			9.8404	0.02798			14.3728	0.0148641
	8.67941	-0.000183949			8.67372	-0.00021203			9.84654	0.0283722			14.3789	0.0148724
	8.68555	-0.000181501			8.67986	-0.000218552			9.85268	0.028733			14.3851	0.0148954
	8.69169	-0.000181988			8.68601	-0.000216393			9.85882	0.0291343			14.3912	0.0149268
	8.69783	-0.000182475			8.69215	-0.000214235			9.86496	0.0295711			14.3973	0.0149543
	8.70397	-0.000184026			8.69829	-0.000223287			9.8711	0.0300127			14.4035	0.0149585
	8.71011	-0.000182133			8.70443	-0.000220748			9.87724	0.0304178			14.4096	0.0149609
	8.71625	-0.000175334			8.71057	-0.00021821			9.88338	0.0307923			14.4158	0.0149633
	8.72239	-0.000173695			8.71671	-0.000217223			9.88952	0.0312141			14.4219	0.0149772
	8.72853	-0.000173311			8.72285	-0.000224743			9.89566	0.031651			14.428	0.0150024
	8.73467	-0.000176088			8.72899	-0.000240826			9.9018	0.0320682			14.4342	0.0150281
	8.74081	-0.000178865			8.73513	-0.000266111			9.90794	0.03246			14.4403	0.0150513
	8.74695	-0.000181734			8.74127	-0.000270478			9.91409	0.0327916			14.4465	0.0150695
	8.75309	-0.000180899			8.74741	-0.000272135			9.92023	0.0330866			14.4526	0.0150967
	8.75923	-0.000179052			8.75355	-0.000276258			9.92637	0.0334199			14.4587	0.0151329
	8.76537	-0.000178218			8.75969	-0.000281356			9.93251	0.0337991			14.4649	0.0151621
	8.77151	-0.000177385			8.76583	-0.00028837			9.93865	0.0341747			14.471	0.0151936
	8.77765	-0.000175541			8.77197	-0.000286249			9.94479	0.0345349			14.4772	0.0152198
	8.78379	-0.000170262			8.77811	-0.000285015			9.95093	0.0348886			14.4833	0.0152253
	8.78993	-0.000165689			8.78425	-0.000287362			9.95707	0.0352238			14.4895	0.0152441
	8.79607	-0.0001659			8.79039	-0.000291716			9.96321	0.0355805			14.4956	0.0152884
	8.80221	-0.00016611			8.79653	-0.000313467			9.96935	0.035956			14.5017	0.0153288
	8.80835	-0.000167718			8.80267	-0.000337205			9.97549	0.0362808			14.5079	0.0153701
	8.81449	-0.00017027			8.80881	-0.000352285			9.98163	0.0365544			14.514	0.0154159
	8.82064	-0.000168564			8.81495	-0.000361957			9.98777	0.0368023			14.5202	0.0154559
	8.82678	-0.000160535			8.82109	-0.000365463			9.99391	0.0370391			14.5263	0.0155045
	8.83292	-0.000153132			8.82723	-0.000370794			10.0001	0.0372989			14.5324	0.0155684
	8.83906	-0.000150549			8.83337	-0.000394133			10.0062	0.0375792			14.5386	0.0156246
	8.8452	-0.000147966			8.83952	-0.000411148			10.0123	0.0378368			14.5447	0.0156615
	8.85134	-0.000140863			8.84566	-0.000409458			10.0185	0.0380719			14.5509	0.0156911
	8.85748	-0.00013155			8.8518	-0.000407769			10.0246	0.0382915			14.557	0.0157303
	8.86362	-0.000129558			8.85794	-0.000417596			10.0308	0.0385503			14.5631	0.015791
	8.86976	-0.000130813			8.86408	-0.000427697			10.0369	0.0388128			14.5693	0.0158528
	8.8759	-0.000132069			8.87022	-0.000448648			10.043	0.0390162			14.5754	0.0159154
	8.88204	-0.00013527			8.87636	-0.000477747			10.0492	0.0391974			14.5816	0.0159838
	8.88818	-0.000136488			8.8825	-0.000488352			10.0553	0.0393479			14.5877	0.0160418
	8.89432	-0.000133069			8.88864	-0.000488151			10.0615	0.0394412			14.5938	0.0161076
	8.90046	-0.000132143			8.89478	-0.000493762			10.0676	0.0395724			14.6	0.0161931
	8.9066	-0.000129133			8.90092	-0.000499324			10.0737	0.0397355			14.6061	0.0162828
	8.91274	-0.000128734			8.90706	-0.000507591			10.0799	0.0398728			14.6123	0.016347
	8.91888	-0.000128336			8.9132	-0.000514963			10.086	0.0400098			14.6184	0.0164037
	8.92502	-0.000124637			8.91934	-0.000513818			10.0922	0.0401127			14.6245	0.0164625
	8.93116	-0.000121596			8.92548	-0.000512673			10.0983	0.0402037			14.6307	0.0165276
	8.9373	-0.000120681			8.93162	-0.000513528			10.1044	0.0403177			14.6368	0.0166134
	8.94344	-0.000122838			8.93776	-0.000524504			10.1106	0.0404248			14.643	0.0167005
	8.94958	-0.000124995			8.9439	-0.000545302			10.1167	0.0405101			14.6491	0.0167883
	8.95572	-0.000130617			8.95004	-0.000551791			10.1229	0.0405435			14.6552	0.016867
	8.96186	-0.000132878			8.95618	-0.000556186			10.129	0.0405428			14.6614	0.016951
	8.968	-0.000132712			8.96232	-0.000563955			10.1351	0.0405629			14.6675	0.0170504
	8.97415	-0.00013359			8.96846	-0.000559718			10.1413	0.0406008			14.6737	0.0171464
	8.98029	-0.000134467			8.9746	-0.000557944			10.1474	0.0406522			14.6798	0.0172367
	8.98643	-0.000134105			8.98074	-0.00055617			10.1536	0.0406508			14.6859	0.0173193
	8.99257	-0.00012957			8.98688	-0.000544209			10.1597	0.0406448			14.6921	0.0173914
	8.99871	-0.000126772			8.99303	-0.000535375			10.1658	0.0406388			14.6982	0.0174657
	9.00485	-0.000125282			8.99917	-0.000531199			10.172	0.0406398			14.7044	0.0175546
	9.01099	-0.000127047			9.00531	-0.000536782			10.1781	0.0406359			14.7105	0.0176498
	9.01713	-0.000128813			9.01145	-0.000542364			10.1843	0.0405953			14.7166	0.017746
	9.02327	-0.000136137			9.01759	-0.000555358			10.1904	0.0405547			14.7228	0.0178446
	9.02941	-0.000132941			9.02373	-0.000560824			10.1965	0.040451			14.7289	0.0179363
	9.03555	-0.000129502			9.02987	-0.000556868			10.2027	0.0403555			14.7351	0.018037
	9.04169	-0.00012446			9.03601	-0.000553622			10.2088	0.0402755			14.7412	0.0181652
	9.04783	-0.000117303			9.04215	-0.000551876			10.215	0.0402032			14.7473	0.0182878
	9.05397	-0.000116965			9.04829	-0.00055013			10.2211	0.0401336			14.7535	0.0183859
	9.06011	-0.000113834			9.05443	-0.000541768			10.2272	0.0400694			14.7596	0.0184775
	9.06625	-0.000106747			9.06057	-0.000524431			10.2334	0.0399833			14.7658	0.0185686
	9.07239	-9.87321e-05			9.06671	-0.000521005			10.2395	0.0398859			14.7719	0.0186637
	9.07853	-0.000100637			9.07285	-0.00051946			10.2457	0.0397896			14.7781	0.0187811
	9.08467	-0.000102543			9.07899	-0.000517916			10.2518	0.0396941			14.7842	0.0189055
	9.09081	-0.000107354			9.08513	-0.000540961			10.2579	0.0395843			14.7903	0.0190198
	9.09695	-0.000110968			9.09127	-0.000541263			10.2641	0.039447			14.7965	0.0191314
	9.10309	-0.000109263			9.09741	-0.000531151			10.2702	0.0392785			14.8026	0.0192468
	9.10923	-0.000108883			9.10355	-0.000527436			10.2764	0.0391386			14.8088	0.0193748
	9.11537	-0.000108754			9.10969	-0.000524361			10.2825	0.0390353			14.8149	0.0195021
	9.12151	-0.000108626			9.11583	-0.000521286			10.2886	0.0388878			14.821	0.0196186
	9.12766	-0.00011029			9.12197	-0.000525994			10.2948	0.0387326			14.8272	0.0197229
	9.1338	-0.000107778			9.12811	-0.000516282			10.3009	0.0385902			14.8333	0.0198136
	9.13994	-0.000104628			9.13425	-0.000511173			10.3071	0.03842			14.8395	0.0199044
	9.14608	-0.000103069			9.14039	-0.000508664			10.3132	0.0382552			14.8456	0.0200129
	9.15222	-0.000104909			9.14654	-0.000506155			10.3194	0.0381184			14.8517	0.0201249
	9.15836	-0.000106749			9.15268	-0.00051438			10.3255	0.0379585			14.8579	0.0202301
	9.1645	-0.000113545			9.15882	-0.000520941			10.3316	0.0377666			14.864	0.0203425
	9.17064	-0.000113864			9.16496	-0.000519392			10.3378	0.0375655			14.8702	0.0204421
	9.17678	-0.000109051			9.1711	-0.000508674			10.3439	0.0373655			14.8763	0.0205437
	9.18292	-0.00010696			9.17724	-0.000508785			10.3501	0.037182			14.8824	0.0206651
	9.18906	-0.00010487			9.18338	-0.000508896			10.3562	0.0370132			14.8886	0.0207698
	9.1952	-0.000100704			9.18952	-0.00051351			10.3623	0.0368572			14.8947	0.020857
	9.20134	-9.26162e-05			9.19566	-0.000504601			10.3685	0.0366712			14.9009	0.020936
	9.20748	-8.74234e-05			9.2018	-0.000494742			10.3746	0.0364476			14.907	0.0210068
	9.21362	-7.84891e-05			9.20794	-0.000491142			10.3808	0.036273			14.9131	0.0210956
	9.21976	-7.76061e-05			9.21408	-0.000497358			10.3869	0.036133			14.9193	0.0211959
	9.2259	-7.77624e-05			9.22022	-0.000503575			10.393	0.0359528			14.9254	0.0212956
	9.23204	-7.79187e-05			9.22636	-0.000517743			10.3992	0.035751			14.9316	0.0213908
	9.23818	-7.87287e-05			9.2325	-0.0005165			10.4053	0.0355368			14.9377	0.0214655
	9.24432	-7.17505e-05			9.23864	-0.000513544			10.4115	0.0353063			14.9438	0.0215462
	9.25046	-6.51151e-05			9.24478	-0.000510588			10.4176	0.0350941			14.95	0.0216473
	9.2566	-5.94133e-05			9.25092	-0.000509417			10.4237	0.0349135			14.9561	0.0217399
	9.26274	-5.66435e-05			9.25706	-0.000509367			10.4299	0.0347372			14.9623	0.0218179
	9.26888	-5.38857e-05			9.2632	-0.000500996			10.436	0.0345541			14.9684	0.0218859
	9.27503	-4.36959e-05			9.26934	-0.000488989			10.4422	0.0343722			14.9745	0.0219363
	9.28117	-3.5975e-05			9.27548	-0.000486088			10.4483	0.0341857			14.9807	0.0219876
	9.28731	-3.77087e-05			9.28162	-0.000483187			10.4544	0.034021			14.9868	0.0220561
	9.29345	-3.94424e-05			9.28776	-0.000485906			10.4606	0.0338933			14.993	0.0221304
	9.29959	-4.34266e-05			9.2939	-0.000499244			10.4667	0.0337463			14.9991	0.0222015
	9.30573	-4.48777e-05			9.30005	-0.00049565			10.4729	0.0335583			15.0052	0.0222608
	9.31187	-4.52902e-05			9.30619	-0.000488749			10.479	0.033362			15.0114	0.0223103
	9.31801	-4.49311e-05			9.31233	-0.000480004			10.4851	0.0332103			15.0175	0.0223647
	9.32415	-4.43217e-05			9.31847	-0.000464074			10.4913	0.0330626			15.0237	0.0224217
	9.33029	-4.44749e-05			9.32461	-0.000460397			10.4974	0.0329132			15.0298	0.022474
	9.33643	-4.46282e-05			9.33075	-0.00045672			10.5036	0.0328008			15.0359	0.022514
	9.34257	-4.13976e-05			9.33689	-0.000438313			10.5097	0.0326709			15.0421	0.0225326
	9.34871	-3.82992e-05			9.34303	-0.000417576			10.5158	0.0325383			15.0482	0.0225492
	9.35485	-3.69049e-05			9.34917	-0.000413096			10.522	0.0324407			15.0544	0.022579
	9.36099	-3.85038e-05			9.35531	-0.000410431			10.5281	0.0323497			15.0605	0.0226152
	9.36713	-4.01026e-05			9.36145	-0.000407766			10.5343	0.0322384			15.0666	0.0226536
	9.37327	-4.6266e-05			9.36759	-0.000417778			10.5404	0.0321099			15.0728	0.0226804
	9.37941	-4.53093e-05			9.37373	-0.000411877			10.5465	0.0319824			15.0789	0.0226912
	9.38555	-3.99949e-05			9.37987	-0.00038993			10.5527	0.0318663			15.0851	0.0227101
	9.39169	-3.50865e-05			9.38601	-0.000379947			10.5588	0.0317544			15.0912	0.0227388
	9.39783	-3.26521e-05			9.39215	-0.000373696			10.565	0.0316694			15.0974	0.022748
	9.40397	-3.22811e-05			9.39829	-0.000367446			10.5711	0.0316318			15.1035	0.0227524
	9.41011	-2.93053e-05			9.40443	-0.000345172			10.5772	0.0315805			15.1096	0.0227467
	9.41625	-2.15142e-05			9.41057	-0.000322943			10.5834	0.0315227			15.1158	0.0227411
	9.42239	-1.41358e-05			9.41671	-0.000316251			10.5895	0.0315021			15.1219	0.0227246
	9.42854	-1.25496e-05			9.42285	-0.000315715			10.5957	0.0314853			15.1281	0.0227255
	9.43468	-1.36052e-05			9.42899	-0.00031518			10.6018	0.03148			15.1342	0.0227198
	9.44082	-1.46608e-05			9.43513	-0.000319514			10.608	0.0314601			15.1403	0.0227142
	9.44696	-1.68807e-05			9.44127	-0.000313555			10.6141	0.0314403			15.1465	0.0226973
	9.4531	-1.04072e-05			9.44741	-0.000301666			10.6202	0.0313838			15.1526	0.0226801
	9.45924	-4.78875e-06			9.45356	-0.000292946			10.6264	0.0313799			15.1588	0.0226713
	9.46538	-9.7233e-07			9.4597	-0.000287017			10.6325	0.0314135			15.1649	0.0226593
	9.47152	-9.09109e-08			9.46584	-0.00028326			10.6387	0.0314253			15.171	0.0226283
	9.47766	7.90509e-07			9.47198	-0.000279503			10.6448	0.0314333			15.1772	0.0225955
	9.4838	8.71854e-06			9.47812	-0.000257135			10.6509	0.0314329			15.1833	0.0225517
	9.48994	2.27693e-05			9.48426	-0.000226022			10.6571	0.0314466			15.1895	0.022503
	9.49608	2.51289e-05			9.4904	-0.000219544			10.6632	0.0315073			15.1956	0.0224702
	9.50222	2.5372e-05			9.49654	-0.000215396			10.6694	0.0315566			15.2017	0.0224318
	9.50836	2.35534e-05			9.50268	-0.000214452			10.6755	0.0315786			15.2079	0.0223905
	9.5145	2.17349e-05			9.50882	-0.000213509			10.6816	0.0316003			15.214	0.0223431
	9.52064	2.40101e-05			9.51496	-0.000204039			10.6878	0.0316177			15.2202	0.0222859
	9.52678	2.9999e-05			9.5211	-0.000192583			10.6939	0.0316449			15.2263	0.0222451
	9.53292	3.77248e-05			9.52724	-0.000179973			10.7001	0.0316977			15.2324	0.0222034
	9.53906	4.23774e-05			9.53338	-0.000166168			10.7062	0.0317725			15.2386	0.0221519
	9.5452	4.47519e-05			9.53952	-0.0001554			10.7123	0.0318797			15.2447	0.0220936
	9.55134	5.09377e-05			9.54566	-0.000131555			10.7185	0.0319811			15.2509	0.0220153
	9.55748	5.76246e-05			9.5518	-0.000101825			10.7246	0.0320701			15.257	0.0219479
	9.56362	6.53012e-05			9.55794	-7.73043e-05			10.7308	0.0322177			15.2631	0.0218875
	9.56976	6.51397e-05			9.56408	-7.48026e-05			10.7369	0.032403			15.2693	0.0218217
	9.5759	6.49782e-05			9.57022	-7.23009e-05			10.743	0.0325702			15.2754	0.0217677
	9.58205	6.26866e-05			9.57636	-7.43845e-05			10.7492	0.0327419			15.2816	0.0217056
	9.58819	6.32118e-05			9.5825	-7.31892e-05			10.7553	0.0329084			15.2877	0.0216281
	9.59433	6.99453e-05			9.58864	-4.93862e-05			10.7615	0.0330636			15.2938	0.0215672
	9.60047	7.53618e-05			9.59478	-3.02136e-05			10.7676	0.0332609			15.3	0.021525
	9.60661	8.38711e-05			9.60092	-1.73252e-05			10.7737	0.0335002			15.3061	0.0214646
	9.61275	9.02352e-05			9.60707	-1.16207e-06			10.7799	0.0337689			15.3123	0.0213934
	9.61889	9.55944e-05			9.61321	1.33817e-05			10.786	0.0340431			15.3184	0.0213191
	9.62503	0.000108048			9.61935	3.54407e-05			10.7922	0.034314			15.3245	0.0212354
	9.63117	0.000122873			9.62549	6.59867e-05			10.7983	0.0346015			15.3307	0.0211526
	9.63731	0.000132952			9.63163	7.61271e-05			10.8044	0.0349146			15.3368	0.0210804
	9.64345	0.000133046			9.63777	8.21648e-05			10.8106	0.035273			15.343	0.0210134
	9.64959	0.000133141			9.64391	8.82024e-05			10.8167	0.0356344			15.3491	0.0209439
	9.65573	0.000131892			9.65005	0.000101879			10.8229	0.0359673			15.3552	0.020873
	9.66187	0.000135399			9.65619	0.000129872			10.829	0.0362839			15.3614	0.0208005
	9.66801	0.000144016			9.66233	0.000154257			10.8351	0.0365984			15.3675	0.0207334
	9.67415	0.000149864			9.66847	0.00018667			10.8413	0.0369874			15.3737	0.0206689
	9.68029	0.000150213			9.67461	0.000202341			10.8474	0.0374364			15.3798	0.0206043
	9.68643	0.000150771			9.68075	0.000216863			10.8536	0.0378987			15.3859	0.0205371
	9.69257	0.000153742			9.68689	0.000255473			10.8597	0.0383698			15.3921	0.0204555
	9.69871	0.000156937			9.69303	0.000298876			10.8658	0.0388439			15.3982	0.0203823
	9.70485	0.000158197			9.69917	0.000330678			10.872	0.0393856			15.4044	0.0203185
	9.71099	0.000155883			9.70531	0.000347832			10.8781	0.0400023			15.4105	0.0202521
	9.71713	0.000153569			9.71145	0.000357534			10.8843	0.0406229			15.4167	0.020193
	9.72327	0.000142777			9.71759	0.000361992			10.8904	0.0412272			15.4228	0.0201378
	9.72941	0.000140358			9.72373	0.000384285			10.8965	0.041828			15.4289	0.020071
	9.73556	0.000142463			9.72987	0.000419611			10.9027	0.0424088			15.4351	0.0200176
	9.7417	0.000142947			9.73601	0.000452396			10.9088	0.0430545			15.4412	0.0199768
	9.74784	0.000143128			9.74215	0.000476132			10.915	0.0437909			15.4474	0.0199276
	9.75398	0.000143309			9.74829	0.000504024			10.9211	0.0445848			15.4535	0.0198774
	9.76012	0.000143767			9.75443	0.000546663			10.9273	0.045436			15.4596	0.0198228
	9.76626	0.000148998			9.76058	0.000584426			10.9334	0.0462962			15.4658	0.0197603
	9.7724	0.000157041			9.76672	0.000619551			10.9395	0.0472107			15.4719	0.0197004
	9.77854	0.000159852			9.77286	0.000649762			10.9457	0.0482694			15.4781	0.019666
	9.78468	0.000160243			9.779	0.000672721			10.9518	0.049372			15.4842	0.0196342
	9.79082	0.000160093			9.78514	0.000684992			10.958	0.0504587			15.4903	0.0195878
	9.79696	0.000159942			9.79128	0.000705658			10.9641	0.051563			15.4965	0.0195439
	9.8031	0.000166513			9.79742	0.000746564			10.9702	0.0526737			15.5026	0.0195085
	9.80924	0.000171032			9.80356	0.000781989			10.9764	0.0538722			15.5088	0.0194807
	9.81538	0.000176121			9.8097	0.000817496			10.9825	0.0552154			15.5149	0.0194556
	9.82152	0.000181126			9.81584	0.000850453			10.9887	0.0566515			15.521	0.0194249
	9.82766	0.000185938			9.82198	0.000880571			10.9948	0.0581667			15.5272	0.0193861
	9.8338	0.000193976			9.82812	0.000928606			11.0009	0.0597528			15.5333	0.0193403
	9.83994	0.000205821			9.83426	0.000980928			11.0071	0.0614007			15.5395	0.0193087
	9.84608	0.000206685			9.8404	0.00101937			11.0132	0.0631945			15.5456	0.0192911
	9.85222	0.000206673			9.84654	0.00104838			11.0194	0.0651276			15.5517	0.0192797
	9.85836	0.000206661			9.85268	0.0010737			11.0255	0.0671239			15.5579	0.0192639
	9.8645	0.000198225			9.85882	0.00110445			11.0316	0.0691432			15.564	0.0192451
	9.87064	0.000194278			9.86496	0.00114509			11.0378	0.0711674			15.5702	0.0192363
	9.87678	0.000201569			9.8711	0.00119599			11.0439	0.0732287			15.5763	0.0192389
	9.88292	0.000202287			9.87724	0.00125352			11.0501	0.0754851			15.5824	0.0192525
	9.88907	0.000203005			9.88338	0.00129675			11.0562	0.0779567			15.5886	0.0192565
	9.89521	0.000203368			9.88952	0.00133028			11.0623	0.0805543			15.5947	0.0192571
	9.90135	0.000204821			9.89566	0.00139146			11.0685	0.0832615			15.6009	0.0192578
	9.90749	0.000207939			9.9018	0.00145947			11.0746	0.0860286			15.607	0.0192563
	9.91363	0.000208375			9.90794	0.00150909			11.0808	0.0889861			15.6131	0.0192586
	9.91977	0.000207816			9.91409	0.00155816			11.0869	0.0922162			15.6193	0.0192789
	9.92591	0.000207258			9.92023	0.00159536			11.093	0.0955125			15.6254	0.0193064
	9.93205	0.000198463			9.92637	0.0016159			11.0992	0.0988592			15.6316	0.0193365
	9.93819	0.000191961			9.93251	0.00164811			11.1053	0.102309			15.6377	0.0193609
	9.94433	0.000192176			9.93865	0.00170704			11.1115	0.105729			15.6438	0.0193931
	9.95047	0.000192164			9.94479	0.00176297			11.1176	0.109294			15.65	0.019445
	9.95661	0.000192152			9.95093	0.0018113			11.1237	0.113189			15.6561	0.0194895
	9.96275	0.000187889			9.95707	0.00185603			11.1299	0.117304			15.6623	0.0195288
	9.96889	0.000183139			9.96321	0.00190243			11.136	0.121629			15.6684	0.019572
	9.97503	0.000184227			9.96935	0.0019657			11.1422	0.126068			15.6745	0.0196046
	9.98117	0.000185523			9.97549	0.00203099			11.1483	0.130602			15.6807	0.0196371
	9.98731	0.000186217			9.98163	0.002088			11.1544	0.135486			15.6868	0.0196861
	9.99345	0.000181048			9.98777	0.00212926			11.1606	0.140638			15.693	0.0197532
	9.99959	0.000175878			9.99391	0.00215051			11.1667	0.145786			15.6991	0.0198197
	10.0057	0.000162818			10.0001	0.00217846			11.1729	0.151005			15.7053	0.0198766
	10.0119	0.000164474			10.0062	0.00222942			11.179	0.156241			15.7114	0.0199478
	10.018	0.000166651			10.0123	0.00228869			11.1851	0.161472			15.7175	0.0200364
	10.0242	0.000166738			10.0185	0.0023462			11.1913	0.167123			15.7237	0.0201289
	10.0303	0.000166825			10.0246	0.00238873			11.1974	0.173163			15.7298	0.020227
	10.0364	0.000164141			10.0308	0.00242747			11.2036	0.179362			15.736	0.0203153
	10.0426	0.000168446			10.0369	0.00248631			11.2097	0.185724			15.7421	0.0203907
	10.0487	0.000171174			10.043	0.00255568			11.2159	0.192176			15.7482	0.0204703
	10.0549	0.000171766			10.0492	0.00261954			11.222	0.198926			15.7544	0.0205637
	10.061	0.00017129			10.0553	0.00266547			11.2281	0.206058			15.7605	0.0206718
	10.0671	0.000170814			10.0615	0.00270408			11.2343	0.213709			15.7667	0.0207917
	10.0733	0.00015772			10.0676	0.00273293			11.2404	0.221394			15.7728	0.0209084
	10.0794	0.000151629			10.0737	0.00276962			11.2466	0.228905			15.7789	0.0210172
	10.0856	0.000152622			10.0799	0.00282777			11.2527	0.236213			15.7851	0.0211395
	10.0917	0.000153048			10.086	0.00288613			11.2588	0.243473			15.7912	0.021286
	10.0978	0.000152491			10.0922	0.00293519			11.265	0.251238			15.7974	0.0214321
	10.104	0.000151934			10.0983	0.00297694			11.2711	0.259262			15.8035	0.021567
	10.1101	0.0001496			10.1044	0.0030286			11.2773	0.26785			15.8096	0.0216914
	10.1163	0.000151128			10.1106	0.00309059			11.2834	0.276426			15.8158	0.021807
	10.1224	0.00015186			10.1167	0.00314682			11.2895	0.285011			15.8219	0.0219294
	10.1285	0.000151722			10.1229	0.00319637			11.2957	0.294124			15.8281	0.0220712
	10.1347	0.000151584			10.129	0.00323794			11.3018	0.303109			15.8342	0.0222277
	10.1408	0.000141669			10.1351	0.00326755			11.308	0.311881			15.8403	0.022384
	10.147	0.000133539			10.1413	0.00330027			11.3141	0.320601			15.8465	0.0225352
	10.1531	0.000134622			10.1474	0.00334833			11.3202	0.329084			15.8526	0.0226961
	10.1592	0.000136564			10.1536	0.00340071			11.3264	0.337516			15.8588	0.0228755
	10.1654	0.000136972			10.1597	0.00344779			11.3325	0.346475			15.8649	0.023053
	10.1715	0.000134481			10.1658	0.00348238			11.3387	0.355789			15.871	0.0232179
	10.1777	0.000131991			10.172	0.00352293			11.3448	0.365194			15.8772	0.0233852
	10.1838	0.000137364			10.1781	0.00357475			11.3509	0.374611			15.8833	0.0235382
	10.1899	0.000141786			10.1843	0.00362629			11.3571	0.383896			15.8895	0.0236816
	10.1961	0.000144047			10.1904	0.00366771			11.3632	0.393504			15.8956	0.0238474
	10.2022	0.000141564			10.1965	0.00369068			11.3694	0.403509			15.9017	0.0240277
	10.2084	0.000139081			10.2027	0.00371005			11.3755	0.41335			15.9079	0.0242111
	10.2145	0.000131639			10.2088	0.00373073			11.3816	0.422955			15.914	0.0243898
	10.2206	0.000129521			10.215	0.00375786			11.3878	0.43228			15.9202	0.0245605
	10.2268	0.000132225			10.2211	0.00379059			11.3939	0.441271			15.9263	0.0247399
	10.2329	0.000132293			10.2272	0.00382945			11.4001	0.450604			15.9324	0.0249427
	10.2391	0.000132361			10.2334	0.00386195			11.4062	0.460647			15.9386	0.0251254
	10.2452	0.000130412			10.2395	0.00388882			11.4123	0.470659			15.9447	0.0252906
	10.2513	0.000131889			10.2457	0.00393235			11.4185	0.481128			15.9509	0.0254514
	10.2575	0.000134422			10.2518	0.00398337			11.4246	0.4919			15.957	0.0256019
	10.2636	0.000135136			10.2579	0.00401545			11.4308	0.501999			15.9631	0.0257557
	10.2698	0.000132108			10.2641	0.00405183			11.4369	0.512008			15.9693	0.0259173
	10.2759	0.000129081			10.2702	0.00407981			11.443	0.521957			15.9754	0.0260926
	10.2821	0.000118508			10.2764	0.00408495			11.4492	0.531554			15.9816	0.0262567
	10.2882	0.000108688			10.2825	0.00411113			11.4553	0.540939			15.9877	0.0264042
	10.2943	0.000107986			10.2886	0.00415346			11.4615	0.550178			15.9938	0.0265596
	10.3005	0.000106101			10.2948	0.00419252			11.4676	0.559294			16	0.0267344
	10.3066	0.000104215			10.3009	0.0042213			11.4737	0.56859			16.0061	0.0269015
	10.3128	9.86528e-05			10.3071	0.00424257			11.4799	0.578001			16.0123	0.0270429
	10.3189	9.7832e-05			10.3132	0.00426548			11.486	0.587362			16.0184	0.0271846
	10.325	0.000103462			10.3194	0.00429212			11.4922	0.596572			16.0246	0.0273092
	10.3312	0.000106482			10.3255	0.00432427			11.4983	0.605558			16.0307	0.0274242
	10.3373	0.000107123			10.3316	0.00434838			11.5044	0.614775			16.0368	0.0275651
	10.3435	0.00010383			10.3378	0.00436349			11.5106	0.62413			16.043	0.027707
	10.3496	0.000100537			10.3439	0.00436986			11.5167	0.633131			16.0491	0.0278376
	10.3557	9.28919e-05			10.3501	0.00437632			11.5229	0.641868			16.0553	0.0279631
	10.3619	8.7839e-05			10.3562	0.00438895			11.529	0.650235			16.0614	0.0280755
	10.368	8.7641e-05			10.3623	0.004405			11.5352	0.658258			16.0675	0.0281895
	10.3742	8.93271e-05			10.3685	0.00443772			11.5413	0.666542			16.0737	0.0283063
	10.3803	8.9434e-05			10.3746	0.00446168			11.5474	0.675082			16.0798	0.0284202
	10.3864	8.95409e-05			10.3808	0.00446545			11.5536	0.683531			16.086	0.0285135
	10.3926	9.2324e-05			10.3869	0.004486			11.5597	0.691907			16.0921	0.0285748
	10.3987	0.000101308			10.393	0.00451531			11.5659	0.699998			16.0982	0.0286402
	10.4049	0.00010172			10.3992	0.00452867			11.572	0.708076			16.1044	0.0287123
	10.411	0.000101884			10.4053	0.0045365			11.5781	0.716528			16.1105	0.0287812
	10.4171	0.000102049			10.4115	0.004536			11.5843	0.724958			16.1167	0.0288554
	10.4233	9.33781e-05			10.4176	0.00453551			11.5904	0.732952			16.1228	0.0289179
	10.4294	8.89624e-05			10.4237	0.00454376			11.5966	0.740501			16.1289	0.0289597
	10.4356	8.85577e-05			10.4299	0.00456568			11.6027	0.74763			16.1351	0.0290072
	10.4417	8.81531e-05			10.436	0.0045723			11.6088	0.754743			16.1412	0.0290677
	10.4478	8.8179e-05			10.4422	0.00457625			11.615	0.762127			16.1474	0.0291158
	10.454	8.82049e-05			10.4483	0.0045785			11.6211	0.769505			16.1535	0.0291451
	10.4601	8.73221e-05			10.4544	0.00458074			11.6273	0.77684			16.1596	0.0291517
	10.4663	8.93599e-05			10.4606	0.00459819			11.6334	0.783968			16.1658	0.0291519
	10.4724	9.27677e-05			10.4667	0.00460096			11.6395	0.790972			16.1719	0.0291521
	10.4785	9.28033e-05			10.4729	0.00460373			11.6457	0.798158			16.1781	0.0291506
	10.4847	9.28389e-05			10.479	0.00460484			11.6518	0.805315			16.1842	0.0291459
	10.4908	9.00754e-05			10.4851	0.00457106			11.658	0.812188			16.1903	0.0291319
	10.497	8.56845e-05			10.4913	0.00455361			11.6641	0.818832			16.1965	0.0291081
	10.5031	8.82025e-05			10.4974	0.00455591			11.6702	0.825118			16.2026	0.0290782
	10.5092	9.15803e-05			10.5036	0.00455546			11.6764	0.831254			16.2088	0.0290481
	10.5154	9.34169e-05			10.5097	0.00455791			11.6825	0.837616			16.2149	0.0290136
	10.5215	9.41802e-05			10.5158	0.00455047			11.6887	0.844058			16.221	0.0289606
	10.5277	9.49435e-05			10.522	0.00454049			11.6948	0.850429			16.2272	0.0288932
	10.5338	9.63755e-05			10.5281	0.00453996			11.7009	0.856673			16.2333	0.0288145
	10.5399	0.000102671			10.5343	0.00454581			11.7071	0.862682			16.2395	0.028734
	10.5461	0.000102624			10.5404	0.00454908			11.7132	0.868729			16.2456	0.0286656
	10.5522	0.000102577			10.5465	0.00454175			11.7194	0.874915			16.2517	0.0285946
	10.5584	0.000100988			10.5527	0.00453443			11.7255	0.880886			16.2579	0.0285107
	10.5645	9.16433e-05			10.5588	0.0045219			11.7316	0.8866			16.264	0.0284179
	10.5706	9.07097e-05			10.565	0.00451914			11.7378	0.892038			16.2702	0.0283148
	10.5768	9.52609e-05			10.5711	0.00452204			11.7439	0.897141			16.2763	0.0282106
	10.5829	0.000102914			10.5772	0.00452493			11.7501	0.902311			16.2824	0.0281101
	10.5891	0.000105456			10.5834	0.00452687			11.7562	0.907653			16.2886	0.0280017
	10.5952	0.000106024			10.5895	0.00451767			11.7623	0.912918			16.2947	0.0278727
	10.6014	0.000110655			10.5957	0.00452446			11.7685	0.918114			16.3009	0.0277366
	10.6075	0.000116456			10.6018	0.00454134			11.7746	0.923056			16.307	0.0275989
	10.6136	0.000123288			10.608	0.00454601			11.7808	0.927859			16.3132	0.0274588
	10.6198	0.000126118			10.6141	0.00454865			11.7869	0.932767			16.3193	0.0273193
	10.6259	0.000126299			10.6202	0.00455128			11.793	0.937552			16.3254	0.0271755
	10.6321	0.000126481			10.6264	0.00453592			11.7992	0.942055			16.3316	0.0270239
	10.6382	0.000124653			10.6325	0.00453417			11.8053	0.946301			16.3377	0.0268582
	10.6443	0.000128534			10.6387	0.00454832			11.8115	0.950213			16.3439	0.0267059
	10.6505	0.000132725			10.6448	0.00455947			11.8176	0.953979			16.35	0.0265568
	10.6566	0.000134338			10.6509	0.00456537			11.8237	0.957845			16.3561	0.0263835
	10.6628	0.000135214			10.6571	0.00457574			11.8299	0.961704			16.3623	0.0262047
	10.6689	0.00013609			10.6632	0.00459175			11.836	0.965433			16.3684	0.0260259
	10.675	0.000140141			10.6694	0.0046038			11.8422	0.968939			16.3746	0.0258394
	10.6812	0.000150246			10.6755	0.00461841			11.8483	0.972171			16.3807	0.0256482
	10.6873	0.000150054			10.6816	0.00462015			11.8545	0.975331			16.3868	0.0254666
	10.6935	0.000149863			10.6878	0.00462188			11.8606	0.978448			16.393	0.0252826
	10.6996	0.000147508			10.6939	0.00461978			11.8667	0.981332			16.3991	0.0250956
	10.7057	0.000137305			10.7001	0.00462217			11.8729	0.983922			16.4053	0.0249106
	10.7119	0.000133414			10.7062	0.00462836			11.879	0.986195			16.4114	0.0247172
	10.718	0.000136075			10.7123	0.00463596			11.8852	0.988223			16.4175	0.0245285
	10.7242	0.000135525			10.7185	0.00465385			11.8913	0.990176			16.4237	0.0243403
	10.7303	0.000134975			10.7246	0.00466162			11.8974	0.992071			16.4298	0.024144
	10.7364	0.000132978			10.7308	0.00466951			11.9036	0.993792			16.436	0.0239405
	10.7426	0.000133242			10.7369	0.00468989			11.9097	0.995306			16.4421	0.0237301
	10.7487	0.000135606			10.743	0.00471316			11.9159	0.996564			16.4482	0.0235216
	10.7549	0.000136046			10.7492	0.00472706			11.922	0.997719			16.4544	0.0233244
	10.761	0.000134087			10.7553	0.00473637			11.9281	0.998807			16.4605	0.0231227
	10.7671	0.000132129			10.7615	0.00474035			11.9343	0.999564			16.4667	0.0229163
	10.7733	0.000122687			10.7676	0.00474433			11.9404	1			16.4728	0.0227161
	10.7794	0.000115145			10.7737	0.0047486			11.9466	0.999984			16.4789	0.0225045
	10.7856	0.000114048			10.7799	0.00476387			11.9527	0.999968			16.4851	0.0222956
	10.7917	0.000112951			10.786	0.0047861			11.9588	0.999877			16.4912	0.022098
	10.7978	0.000110362			10.7922	0.00480475			11.965	0.999447			16.4974	0.0218946
	10.804	0.000108688			10.7983	0.0048271			11.9711	0.998706			16.5035	0.0216784
	10.8101	0.000106628			10.8044	0.00485292			11.9773	0.997727			16.5096	0.021465
	10.8163	0.000104094			10.8106	0.00488214			11.9834	0.996602			16.5158	0.0212536
	10.8224	0.000103358			10.8167	0.00491222			11.9895	0.995317			16.5219	0.0210432
	10.8285	0.000102622			10.8229	0.00494209			11.9957	0.993781			16.5281	0.020846
	10.8347	0.000100127			10.829	0.00495485			12.0018	0.991981			16.5342	0.0206477
	10.8408	8.82192e-05			10.8351	0.00496761			12.008	0.990007			16.5403	0.0204409
	10.847	7.83421e-05			10.8413	0.00498424			12.0141	0.987814			16.5465	0.0202308
	10.8531	7.47442e-05			10.8474	0.00502505			12.0202	0.985419			16.5526	0.0200343
	10.8592	7.39751e-05			10.8536	0.00506107			12.0264	0.982865			16.5588	0.0198423
	10.8654	7.3206e-05			10.8597	0.00509785			12.0325	0.980116			16.5649	0.0196454
	10.8715	7.13501e-05			10.8658	0.00513229			12.0387	0.977102			16.571	0.0194563
	10.8777	6.46565e-05			10.872	0.00515932			12.0448	0.973857			16.5772	0.0192744
	10.8838	6.50089e-05			10.8781	0.00520761			12.0509	0.970395			16.5833	0.0190765
	10.89	6.62254e-05			10.8843	0.00526529			12.0571	0.966723			16.5895	0.018872
	10.8961	6.68635e-05			10.8904	0.00531078			12.0632	0.9628			16.5956	0.0186955
	10.9022	6.56255e-05			10.8965	0.00534439			12.0694	0.958562			16.6017	0.0185198
	10.9084	6.43876e-05			10.9027	0.00537249			12.0755	0.954178			16.6079	0.0183419
	10.9145	5.37565e-05			10.9088	0.00540188			12.0816	0.949667			16.614	0.0181737
	10.9207	4.82953e-05			10.915	0.00543679			12.0878	0.94501			16.6202	0.0179954
	10.9268	5.02543e-05			10.9211	0.00549267			12.0939	0.940363			16.6263	0.0178206
	10.9329	4.95974e-05			10.9273	0.00555707			12.1001	0.935507			16.6325	0.0176535
	10.9391	4.89404e-05			10.9334	0.0056055			12.1062	0.930322			16.6386	0.0174904
	10.9452	4.66855e-05			10.9395	0.00565205			12.1123	0.924951			16.6447	0.0173297
	10.9514	4.58841e-05			10.9457	0.00571606			12.1185	0.919356			16.6509	0.0171582
	10.9575	5.26007e-05			10.9518	0.00579674			12.1246	0.913602			16.657	0.0169847
	10.9636	5.3312e-05			10.958	0.00586733			12.1308	0.907729			16.6632	0.0168236
	10.9698	5.36387e-05			10.9641	0.00593026			12.1369	0.901528			16.6693	0.0166712
	10.9759	4.86881e-05			10.9702	0.0059857			12.1431	0.895106			16.6754	0.0165324
	10.9821	4.37375e-05			10.9764	0.0060277			12.1492	0.888693			16.6816	0.0163909
	10.9882	3.61538e-05			10.9825	0.00608099			12.1553	0.882214			16.6877	0.016233
	10.9943	3.59913e-05			10.9887	0.00614892			12.1615	0.875779			16.6939	0.016086
	11.0005	3.58287e-05			10.9948	0.00622115			12.1676	0.869297			16.7	0.0159568
	11.0066	3.53969e-05			11.0009	0.00630054			12.1738	0.862464			16.7061	0.0158279
	11.0128	3.49652e-05			11.0071	0.00638002			12.1799	0.855385			16.7123	0.0156908
	11.0189	3.3546e-05			11.0132	0.00645906			12.186	0.84818			16.7184	0.0155606
	11.025	3.69224e-05			11.0194	0.00655598			12.1922	0.84087			16.7246	0.0154206
	11.0312	3.74701e-05			11.0255	0.00665406			12.1983	0.833588			16.7307	0.0152852
	11.0373	3.73947e-05			11.0316	0.00674382			12.2045	0.826037			16.7368	0.0151717
	11.0435	3.73193e-05			11.0378	0.00683669			12.2106	0.818127			16.743	0.0150585
	11.0496	2.91948e-05			11.0439	0.00692327			12.2167	0.810279			16.7491	0.0149407
	11.0557	2.19592e-05			11.0501	0.0070113			12.2229	0.802496			16.7553	0.014828
	11.0619	2.05243e-05			11.0562	0.00711631			12.229	0.794791			16.7614	0.0147225
	11.068	1.94091e-05			11.0623	0.00723514			12.2352	0.787303			16.7675	0.0146188
	11.0742	1.93742e-05			11.0685	0.00736206			12.2413	0.779592			16.7737	0.0145234
	11.0803	1.93393e-05			11.0746	0.00749032			12.2474	0.771531			16.7798	0.0144308
	11.0864	1.77168e-05			11.0808	0.00762738			12.2536	0.763371			16.786	0.0143311
	11.0926	1.73049e-05			11.0869	0.00778277			12.2597	0.755153			16.7921	0.0142213
	11.0987	2.3221e-05			11.093	0.00796327			12.2659	0.747022			16.7982	0.0141208
	11.1049	2.44174e-05			11.0992	0.00814346			12.272	0.738782			16.8044	0.014028
	11.111	2.45345e-05			11.1053	0.00830585			12.2781	0.730231			16.8105	0.0139435
	11.1171	2.46515e-05			11.1115	0.00847843			12.2843	0.721349			16.8167	0.013861
	11.1233	1.33911e-05			11.1176	0.00865628			12.2904	0.712591			16.8228	0.0137755
	11.1294	7.54091e-06			11.1237	0.00883865			12.2966	0.70424			16.8289	0.0136931
	11.1356	9.84507e-06			11.1299	0.00904193			12.3027	0.696195			16.8351	0.013622
	11.1417	1.07306e-05			11.136	0.0092667			12.3088	0.688148			16.8412	0.0135647
	11.1478	1.10064e-05			11.1422	0.00951206			12.315	0.67972			16.8474	0.0134968
	11.154	1.10991e-05			11.1483	0.00974961			12.3211	0.671145			16.8535	0.0134211
	11.1601	1.11918e-05			11.1544	0.0100077			12.3273	0.662515			16.8596	0.0133461
	11.1663	1.58064e-05			11.1606	0.0103085			12.3334	0.653986			16.8658	0.0132647
	11.1724	1.80895e-05			11.1667	0.0106095			12.3395	0.645638			16.8719	0.0131906
	11.1785	1.92086e-05			11.1729	0.0109193			12.3457	0.637028			16.8781	0.0131349
	11.1847	1.54639e-05			11.179	0.0112309			12.3518	0.628203			16.8842	0.0130809
	11.1908	1.17193e-05			11.1851	0.0115206			12.358	0.619572			16.8903	0.0130258
	11.197	6.41892e-06			11.1913	0.0118345			12.3641	0.611107			16.8965	0.0129686
	11.2031	8.7738e-06			11.1974	0.0121929			12.3702	0.602939			16.9026	0.0129138
	11.2093	1.17863e-05			11.2036	0.012575			12.3764	0.595034			16.9088	0.0128734
	11.2154	1.66691e-05			11.2097	0.0129769			12.3825	0.586882			16.9149	0.0128368
	11.2215	1.79348e-05			11.2159	0.013396			12.3887	0.578439			16.921	0.0128006
	11.2277	1.92004e-05			11.222	0.0138219			12.3948	0.569975			16.9272	0.0127647
	11.2338	2.548e-05			11.2281	0.0142888			12.4009	0.561575			16.9333	0.0127206
	11.24	3.75936e-05			11.2343	0.014794			12.4071	0.553204			16.9395	0.0126686
	11.2461	4.32851e-05			11.2404	0.0152995			12.4132	0.544675			16.9456	0.0126356
	11.2522	4.29948e-05			11.2466	0.0158093			12.4194	0.536093			16.9518	0.012614
	11.2584	4.27046e-05			11.2527	0.0163159			12.4255	0.527746			16.9579	0.0125886
	11.2645	3.9476e-05			11.2588	0.0168309			12.4316	0.51963			16.964	0.0125714
	11.2707	3.89839e-05			11.265	0.0173862			12.4378	0.511698			16.9702	0.0125459
	11.2768	4.77887e-05			11.2711	0.0179854			12.4439	0.504147			16.9763	0.0125235
	11.2829	5.32648e-05			11.2773	0.0186274			12.4501	0.496639			16.9825	0.0125145
	11.2891	5.41202e-05			11.2834	0.0192926			12.4562	0.488592			16.9886	0.0124998
	11.2952	5.46233e-05			11.2895	0.0199461			12.4624	0.47956			16.9947	0.0124755
	11.3014	5.71313e-05			11.2957	0.0206367			12.4685	0.470794			17.0009	0.0124432
	11.3075	6.46482e-05			11.3018	0.0214038			12.4746	0.463087			17.007	0.0124108
	11.3136	7.43902e-05			11.308	0.0221865			12.4808	0.455324			17.0132	0.0123818
	11.3198	7.43999e-05			11.3141	0.0229607			12.4869	0.447434			17.0193	0.012361
	11.3259	7.44096e-05			11.3202	0.0237373			12.4931	0.439717			17.0254	0.0123474
	11.3321	7.26895e-05			11.3264	0.0244883			12.4992	0.432248			17.0316	0.0123241
	11.3382	6.59201e-05			11.3325	0.0252681			12.5053	0.424993			17.0377	0.0122965
	11.3443	6.76507e-05			11.3387	0.0261329			12.5115	0.418063			17.0439	0.0122801
	11.3505	7.55976e-05			11.3448	0.0270257			12.5176	0.411343			17.05	0.0122713
	11.3566	8.12956e-05			11.3509	0.0279324			12.5238	0.404462			17.0561	0.0122615
	11.3628	8.73068e-05			11.3571	0.0288667			12.5299	0.397483			17.0623	0.012246
	11.3689	9.38414e-05			11.3632	0.0298116			12.536	0.39053			17.0684	0.0122278
	11.375	0.000102011			11.3694	0.030807			12.5422	0.383696			17.0746	0.012194
	11.3812	0.000112901			11.3755	0.0318476			12.5483	0.377083			17.0807	0.0121525
	11.3873	0.000123428			11.3816	0.0328843			12.5545	0.370437			17.0868	0.0121356
	11.3935	0.000128306			11.3878	0.0339258			12.5606	0.363636			17.093	0.0121284
	11.3996	0.000129665			11.3939	0.0349471			12.5667	0.357031			17.0991	0.0121193
	11.4057	0.000131023			11.4001	0.0359463			12.5729	0.350635			17.1053	0.0121007
	11.4119	0.000137984			11.4062	0.0370118			12.579	0.344438			17.1114	0.0120779
	11.418	0.000149894			11.4123	0.0381546			12.5852	0.33856			17.1175	0.0120688
	11.4242	0.000159678			11.4185	0.0393284			12.5913	0.332663			17.1237	0.0120628
	11.4303	0.000164404			11.4246	0.0405144			12.5974	0.326589			17.1298	0.012064
	11.4364	0.000167783			11.4308	0.0416892			12.6036	0.32058			17.136	0.0120522
	11.4426	0.000174932			11.4369	0.0428983			12.6097	0.314656			17.1421	0.0120182
	11.4487	0.00018624			11.443	0.0439079			12.6159	0.308862			17.1482	0.0119804
	11.4549	0.000195936			11.4492	0.0448707			12.622	0.303202			17.1544	0.0119535
	11.461	0.000198284			11.4553	0.046076			12.6281	0.297472			17.1605	0.0119486
	11.4671	0.00019882			11.4615	0.047319			12.6343	0.291798			17.1667	0.0119452
	11.4733	0.000198292			11.4676	0.0485038			12.6404	0.285968			17.1728	0.011946
	11.4794	0.000197764			11.4737	0.049706			12.6466	0.2803			17.1789	0.011935
	11.4856	0.000205222			11.4799	0.0510091			12.6527	0.275256			17.1851	0.0119218
	11.4917	0.000213211			11.486	0.0523498			12.6588	0.270244			17.1912	0.0119305
	11.4978	0.000220029			11.4922	0.0537038			12.665	0.264805			17.1974	0.0119352
	11.504	0.000226807			11.4983	0.055048			12.6711	0.259425			17.2035	0.0119327
	11.5101	0.000231361			11.5044	0.0563855			12.6773	0.254427			17.2096	0.0119302
	11.5163	0.000241982			11.5106	0.0577781			12.6834	0.249544			17.2158	0.0119149
	11.5224	0.000253832			11.5167	0.0591926			12.6895	0.244847			17.2219	0.0119009
	11.5286	0.000259119			11.5229	0.060578			12.6957	0.240122			17.2281	0.0118996
	11.5347	0.00026185			11.529	0.0619457			12.7018	0.235339			17.2342	0.0118929
	11.5408	0.000262724			11.5352	0.0632439			12.708	0.23051			17.2404	0.0118843
	11.547	0.000263597			11.5413	0.0645045			12.7141	0.225669			17.2465	0.0118791
	11.5531	0.000265285			11.5474	0.0658338			12.7202	0.221262			17.2526	0.0118668
	11.5593	0.000269579			11.5536	0.0672225			12.7264	0.217144			17.2588	0.0118573
	11.5654	0.00027913			11.5597	0.0686242			12.7325	0.212628			17.2649	0.0118576
	11.5715	0.000283094			11.5659	0.0700214			12.7387	0.208135			17.2711	0.0118564
	11.5777	0.000285039			11.572	0.0713796			12.7448	0.204071			17.2772	0.0118419
	11.5838	0.000286983			11.5781	0.0727629			12.751	0.200081			17.2833	0.0118106
	11.59	0.000296823			11.5843	0.0742142			12.7571	0.196246			17.2895	0.0117753
	11.5961	0.000307824			11.5904	0.0756393			12.7632	0.192458			17.2956	0.0117495
	11.6022	0.000313295			11.5966	0.0770104			12.7694	0.18861			17.3018	0.0117346
	11.6084	0.000314173			11.6027	0.0783425			12.7755	0.184866			17.3079	0.0117168
	11.6145	0.000314697			11.6088	0.0796195			12.7817	0.181263			17.314	0.0116973
	11.6207	0.00031522			11.615	0.080924			12.7878	0.177775			17.3202	0.011678
	11.6268	0.000322915			11.6211	0.082305			12.7939	0.174501			17.3263	0.0116547
	11.6329	0.000335231			11.6273	0.0836989			12.8001	0.1713			17.3325	0.0116395
	11.6391	0.000343931			11.6334	0.0850973			12.8062	0.168003			17.3386	0.0116325
	11.6452	0.000347651			11.6395	0.0864636			12.8124	0.164728			17.3447	0.0116088
	11.6514	0.000351408			11.6457	0.0878254			12.8185	0.161529			17.3509	0.0115756
	11.6575	0.000361007			11.6518	0.0892444			12.8246	0.158416			17.357	0.01154
	11.6636	0.00037347			11.658	0.0906688			12.8308	0.155439			17.3632	0.0115007
	11.6698	0.000385525			11.6641	0.0920547			12.8369	0.152453			17.3693	0.0114714
	11.6759	0.000385689			11.6702	0.0934014			12.8431	0.149443			17.3754	0.0114465
	11.6821	0.000385853			11.6764	0.0946789			12.8492	0.146543			17.3816	0.0114277
	11.6882	0.000385141			11.6825	0.095933			12.8553	0.143751			17.3877	0.0113976
	11.6943	0.000387311			11.6887	0.0972627			12.8615	0.141107			17.3939	0.0113657
	11.7005	0.000393243			11.6948	0.0986212			12.8676	0.138575			17.4	0.0113467
	11.7066	0.000401064			11.7009	0.0999872			12.8738	0.13604			17.4061	0.0113249
	11.7128	0.000405939			11.7071	0.101361			12.8799	0.133511			17.4123	0.0112936
	11.7189	0.000409258			11.7132	0.102696			12.886	0.130994			17.4184	0.0112587
	11.725	0.000417476			11.7194	0.104069			12.8922	0.128511			17.4246	0.0112121
	11.7312	0.000429919			11.7255	0.105488			12.8983	0.126159			17.4307	0.011158
	11.7373	0.000435384			11.7316	0.106865			12.9045	0.123824			17.4368	0.011121
	11.7435	0.000437912			11.7378	0.108213			12.9106	0.121478			17.443	0.0110973
	11.7496	0.000437112			11.7439	0.109522			12.9167	0.119221			17.4491	0.0110624
	11.7557	0.000436312			11.7501	0.110778			12.9229	0.116996			17.4553	0.0110148
	11.7619	0.000437595			11.7562	0.112083			12.929	0.114841			17.4614	0.0109755
	11.768	0.000443886			11.7623	0.113451			12.9352	0.112872			17.4675	0.0109398
	11.7742	0.000450944			11.7685	0.114835			12.9413	0.110949			17.4737	0.0109081
	11.7803	0.000459353			11.7746	0.116234			12.9474	0.108944			17.4798	0.0108778
	11.7864	0.000459918			11.7808	0.117599			12.9536	0.107001			17.486	0.0108342
	11.7926	0.000460484			11.7869	0.118974			12.9597	0.105095			17.4921	0.0107812
	11.7987	0.000469188			11.793	0.120421			12.9659	0.103244			17.4982	0.0107205
	11.8049	0.000478496			11.7992	0.121867			12.972	0.101487			17.5044	0.0106667
	11.811	0.000479344			11.8053	0.123277			12.9781	0.0997184			17.5105	0.0106224
	11.8172	0.000478677			11.8115	0.124654			12.9843	0.0979683			17.5167	0.0105823
	11.8233	0.000478011			11.8176	0.125953			12.9904	0.0962643			17.5228	0.0105417
	11.8294	0.000476758			11.8237	0.12727			12.9966	0.0946094			17.5289	0.0104861
	11.8356	0.000483054			11.8299	0.12868			13.0027	0.0930665			17.5351	0.0104316
	11.8417	0.000487017			11.836	0.130112			13.0088	0.0915891			17.5412	0.0103983
	11.8479	0.000491231			11.8422	0.131545			13.015	0.0900943			17.5474	0.0103656
	11.854	0.000494855			11.8483	0.132956			13.0211	0.0885983			17.5535	0.0103179
	11.8601	0.000497964			11.8545	0.13436			13.0273	0.087143			17.5597	0.0102678
	11.8663	0.000503717			11.8606	0.13583			13.0334	0.0856925			17.5658	0.0102028
	11.8724	0.000513035			11.8667	0.13732			13.0395	0.0842989			17.5719	0.0101415
	11.8786	0.000515075			11.8729	0.138774			13.0457	0.0829551			17.5781	0.01009
	11.8847	0.000515152			11.879	0.140197			13.0518	0.0815988			17.5842	0.010041
	11.8908	0.000515229			11.8852	0.141553			13.058	0.0802965			17.5904	0.00999763
	11.897	0.000513654			11.8913	0.142974			13.0641	0.0790438			17.5965	0.00993997
	11.9031	0.000515362			11.8974	0.144525			13.0703	0.0778027			17.6026	0.00987708
	11.9093	0.000518831			11.9036	0.146036			13.0764	0.0766136			17.6088	0.00983299
	11.9154	0.000526398			11.9097	0.147553			13.0825	0.07548			17.6149	0.00979463
	11.9215	0.00053214			11.9159	0.149147			13.0887	0.0743106			17.6211	0.00974325
	11.9277	0.000533967			11.922	0.150629			13.0948	0.0731538			17.6272	0.00968283
	11.9338	0.000538414			11.9281	0.152037			13.101	0.0720507			17.6333	0.0096133
	11.94	0.000548925			11.9343	0.153515			13.1071	0.0709666			17.6395	0.00954185
	11.9461	0.000557564			11.9404	0.154972			13.1132	0.0699065			17.6456	0.00948656
	11.9522	0.000556626			11.9466	0.156375			13.1194	0.0688459			17.6518	0.0094388
	11.9584	0.000555689			11.9527	0.15772			13.1255	0.0678141			17.6579	0.00938282
[truncated: 1,989 more rows]

## Sheet: LBD-OD SEC-MALS, free and bound
Free LBD-OD	volume (mL)	Molar Mass 1		volume (mL)	RI		LBD+LC8	volume (mL)	Molar Mass 1	volume (mL)	Molar Mass 2	volume (mL)	Molar Mass 3	volume (mL)	Molar Mass 4		volume (mL)	RI
	10.4189	83403.1		-0.315822	-0.000124794			16.5803	23210.4	10.8766	127711	9.79633	207063	9.02321	364811		-0.057925	-0.00337669
	10.4275	82674.5		-0.30705	-0.000126647			16.5854	23468.2	10.8818	127396	9.80145	206690	9.02833	362606		-0.0526618	-0.00323156
	10.436	80933.3		-0.298278	-0.000129762			16.5905	23391.9	10.8869	127219	9.80657	206180	9.03345	360383		-0.0473986	-0.00321052
	10.4445	79174.7		-0.289506	-0.000130456			16.5956	23332.7	10.892	127066	9.81169	205487	9.03857	358155		-0.0421354	-0.00326798
	10.4531	77394.9		-0.280734	-0.000131112			16.6008	23267.9	10.8971	126855	9.81681	204722	9.04369	355475		-0.0368722	-0.00332544
	10.4616	75608.8		-0.271962	-0.000132886			16.6059	23215.5	10.9022	126623	9.82193	203891	9.04881	352594		-0.031609	-0.00338362
	10.4701	74438.2		-0.26319	-0.000132738			16.611	23142.5	10.9074	126438	9.82705	203002	9.05393	349558		-0.0263458	-0.00345886
	10.4787	73768.5		-0.254418	-0.00013183			16.6161	23060.4	10.9125	126341	9.83217	202207	9.05905	346690		-0.0210826	-0.0035341
	10.4872	72786.7		-0.245646	-0.000129577			16.6212	23026.8	10.9176	126282	9.83729	201571	9.06417	344420		-0.0158194	-0.00368124
	10.4957	71542.5		-0.236874	-0.000127169			16.6264	23010.1	10.9227	126276	9.84241	200924	9.06929	342626		-0.0105562	-0.0040564
	10.5043	70267.9		-0.228102	-0.000126832			16.6315	22985.8	10.9278	126256	9.84753	200291	9.07441	340818		-0.00529297	-0.00417733
	10.5128	69108.4		-0.21933	-0.000125944			16.6366	22928.7	10.933	126097	9.85265	199689	9.07953	338919		-2.97705e-05	-0.00405258
	10.5213	68086.8		-0.210558	-0.00012433			16.6417	22876.4	10.9381	125862	9.85777	199027	9.08465	336995		0.00523343	-0.00380021
	10.5299	67091.2		-0.201786	-0.000124422			16.6468	22829.6	10.9432	125576	9.86289	198442	9.08977	334967		0.0104966	-0.00328763
	10.5384	66144		-0.193014	-0.000124515			16.652	22796.9	10.9483	125196	9.86801	198114	9.09489	333195		0.0157598	-0.00266644
	10.5469	65370.1		-0.184242	-0.000123503			16.6571	22758.5	10.9534	124972	9.87313	197813	9.10001	331569		0.021023	-0.00256045
	10.5555	64564.6		-0.17547	-0.000120836			16.6622	22709.1	10.9586	124763	9.87825	197409	9.10513	330028		0.0262862	-0.00245445
	10.564	63679.1		-0.166698	-0.000119264			16.6673	22651.2	10.9637	124583	9.88337	196908	9.11025	328405		0.0315494	-0.00246826
	10.5725	62982.9		-0.157926	-0.000119013			16.6724	22590	10.9688	124385	9.88849	196349	9.11537	326644		0.0368126	-0.00248247
	10.5811	62369		-0.149154	-0.000118917			16.6776	22525.7	10.9739	124201	9.89361	195682	9.12049	324505		0.0420758	-0.00254741
	10.5896	61704.3		-0.140382	-0.000119214			16.6827	22476.2	10.979	123890	9.89873	194928	9.12561	322342		0.047339	-0.00261235
	10.5981	61106.3		-0.13161	-0.000119511			16.6878	22427.7	10.9842	123658	9.90385	194321	9.13073	320431		0.0526022	-0.00272801
	10.6067	60476.2		-0.122838	-0.000120033			16.6929	22376.4	10.9893	123634	9.90897	193846	9.13585	318805		0.0578654	-0.0031433
	10.6152	59899.1		-0.114066	-0.000121079			16.698	22328.6	10.9944	123629	9.91409	193404	9.14097	317269		0.0631286	-0.00340091
	10.6237	59396.2		-0.105294	-0.000119509			16.7032	22286.7	10.9995	123461	9.91921	192900	9.14609	315711		0.0683918	-0.00336806
	10.6323	58970.9		-0.0965219	-0.000119029			16.7083	22249.4	11.0046	123108	9.92433	192369	9.15121	314104		0.073655	-0.00315049
	10.6408	58623.1		-0.0877499	-0.00011855			16.7134	22204.5	11.0098	122706	9.92945	191874	9.15633	312338		0.0789182	-0.00283236
	10.6493	58122.9		-0.0789779	-0.000118011			16.7185	22151.1	11.0149	122295	9.93457	191548	9.16145	310781		0.0841814	-0.0023372
	10.6579	57567.9		-0.0702059	-0.000116355			16.7236	22091.8	11.02	121932	9.93969	191315	9.16657	309503		0.0894446	-0.00219016
	10.6664	57116.3		-0.0614339	-0.000116244			16.7288	22040.9	11.0251	121690	9.94481	190952	9.17169	308378		0.0947078	-0.00218131
	10.6749	56783.7		-0.0526619	-0.000116062			16.7339	22003.8	11.0302	121383	9.94993	190488	9.17681	307090		0.099971	-0.00218709
	10.6835	56493.8		-0.0438899	-0.000114072			16.739	21975.7	11.0354	121200	9.95505	189960	9.18193	305539		0.105234	-0.00222755
	10.692	56206.5		-0.0351179	-0.000111678			16.7441	21950.7	11.0405	120999	9.96017	189369	9.18705	303863		0.110497	-0.00226802
	10.7005	55908.1		-0.0263459	-0.000108331			16.7492	21925.3	11.0456	120734	9.96529	188605	9.19217	302079		0.115761	-0.00238086
	10.7091	55584.6		-0.0175739	-0.000106442			16.7544	21899.5	11.0507	120491	9.97041	187914	9.19729	300335		0.121024	-0.0024937
	10.7176	55336		-0.00880192	-0.000104867			16.7595	21868.6	11.0558	120411	9.97553	187348	9.20241	298887		0.126287	-0.0027275
	10.7261	55159.8		-2.99e-05	-0.000102325			16.7646	21829.9	11.061	120386	9.98065	186930	9.20753	297686		0.13155	-0.0031188
	10.7347	54932.8		0.00874208	-0.000101552			16.7697	21796.1	11.0661	120328	9.98577	186542	9.21265	296521		0.136813	-0.00316106
	10.7432	54681.5		0.0175141	-0.000101184			16.7748	21755.7	11.0712	120180	9.99089	186169	9.21777	295244		0.142077	-0.00298325
	10.7517	54447.9		0.0262861	-9.93e-05			16.78	21709	11.0763	119993	9.99601	185759	9.22289	293949		0.14734	-0.00269358
	10.7603	54298.6		0.0350581	-9.55e-05			16.7851	21654.2	11.0814	119731	10.0011	185216	9.22801	292636		0.152603	-0.00220392
	10.7688	54215		0.0438301	-9.27e-05			16.7902	21615.2	11.0866	119457	10.0062	184733	9.23313	291527		0.157866	-0.00169673
	10.7773	54040.3		0.0526021	-9.05e-05			16.7953	21588.1	11.0917	119091	10.0114	184425	9.23825	290703		0.163129	-0.00172431
	10.7859	53843.1		0.0613741	-8.79e-05			16.8004	21571.2	11.0968	118784	10.0165	184026	9.24337	290103		0.168393	-0.00175188
	10.7944	53674.8		0.0701461	-8.6e-05			16.8056	21564.8	11.1019	118663	10.0216	183501	9.24849	289284		0.173656	-0.00180335
	10.8029	53488.2		0.078918	-8.39e-05			16.8107	21569	11.107	118480	10.0267	182920	9.25361	288224		0.178919	-0.00179274
	10.8115	53270.5		0.08769	-8.27e-05			16.8158	21567.1	11.1122	118283	10.0318	182281	9.25873	286798		0.184182	-0.00186691
	10.82	53035.8		0.096462	-8.1e-05			16.8209	21552.9	11.1173	117982	10.037	181691	9.26385	285161		0.189445	-0.00194108
	10.8285	52818.4		0.105234	-7.8e-05			16.826	21533.2	11.1224	117574	10.0421	181028	9.26897	283403		0.194709	-0.00210644
	10.8371	52628.4		0.114006	-7.59e-05			16.8312	21507.1	11.1275	117096	10.0472	180433	9.27409	281893		0.199972	-0.00256414
	10.8456	52459.9		0.122778	-7.47e-05			16.8363	21474.4	11.1326	116723	10.0523	179972	9.27921	280668		0.205235	-0.00270381
	10.8541	52335.9		0.13155	-7.3e-05			16.8414	21440.1	11.1378	116517	10.0574	179491	9.28433	279544		0.210498	-0.00262868
	10.8627	52260.2		0.140322	-7.1e-05			16.8465	21394.9	11.1429	116456	10.0626	179026	9.28945	278377		0.215761	-0.00242122
	10.8712	52197.2		0.149094	-7.06e-05			16.8516	21349	11.148	116116	10.0677	178585	9.29457	277124		0.221025	-0.00192344
	10.8797	52121		0.157866	-7.06e-05			16.8568	21325.4	11.1531	115626	10.0728	178279	9.29969	276265		0.226288	-0.0013493
	10.8883	52027		0.166638	-6.86e-05			16.8619	21330	11.1582	115165	10.0779	178200	9.30481	275580		0.231551	-0.00133888
	10.8968	51931.1		0.17541	-6.59e-05			16.867	21341.5	11.1634	114879	10.083	177910	9.30993	274971		0.236814	-0.00135305
	10.9053	51862.3		0.184182	-6.33e-05			16.8721	21352.5	11.1685	114711	10.0882	177439	9.31505	274264		0.242077	-0.00140023
	10.9139	51815.1		0.192954	-6.17e-05			16.8772	21343.5	11.1736	114590	10.0933	176877	9.32017	273295		0.247341	-0.00144741
	10.9224	51757.1		0.201726	-6.11e-05			16.8824	21328.7	11.1787	114547	10.0984	176273	9.32529	272002		0.252604	-0.00147342
	10.9309	51686.7		0.210498	-5.93e-05			16.8875	21313.9	11.1838	114542	10.1035	175597	9.33041	270452		0.257867	-0.00149943
	10.9395	51614.2		0.21927	-5.95e-05			16.8926	21299.2	11.189	114480	10.1086	174983	9.33553	268844		0.26313	-0.00158296
	10.948	51531.6		0.228042	-5.97e-05			16.8977	21277.9	11.1941	114483			9.34065	267748		0.268393	-0.00200701
	10.9565	51409.5		0.236814	-6e-05			16.9028	21239.2	11.1992	114561			9.34577	266767		0.273657	-0.00226473
	10.9651	51279.4		0.245586	-5.83e-05			16.908	21196.4	11.2043	114640			9.35089	265655		0.27892	-0.00223681
	10.9736	51203.7		0.254358	-5.73e-05			16.9131	21166.8	11.2094	114586			9.35601	264624		0.284183	-0.00205893
	10.9821	51192.8		0.26313	-5.63e-05			16.9182	21162.5	11.2146	114427			9.36113	263652		0.289446	-0.00172898
	10.9907	51171.5		0.271902	-5.59e-05			16.9233	21156.7	11.2197	114104			9.36625	262636		0.294709	-0.00123176
	10.9992	51140.1		0.280674	-5.47e-05			16.9284	21132.5	11.2248	113712			9.37137	261778		0.299973	-0.00110917
	11.0077	51034.6		0.289446	-5.47e-05			16.9336	21120.3	11.2299	113366			9.37649	261263		0.305236	-0.00113025
	11.0163	50954.2		0.298218	-5.47e-05			16.9387	21115.6	11.235	113188			9.38161	260571		0.310499	-0.00115133
	11.0248	50920.3		0.30699	-5.44e-05			16.9438	21123.1	11.2402	113102						0.315762	-0.00119949
	11.0333	50900.1		0.315762	-5.24e-05			16.9489	21143.3	11.2453	112978						0.321025	-0.00124634
	11.0419	50828.6		0.324534	-5.08e-05			16.954	21146.9	11.2504	112766						0.326289	-0.00129554
	11.0504	50739.5		0.333306	-5.06e-05			16.9592	21139.1	11.2555	112543						0.331552	-0.00134474
	11.0589	50690.2		0.342078	-4.99e-05			16.9643	21143.4	11.2606	112383						0.336815	-0.00177149
	11.0675	50653.7		0.35085	-5e-05			16.9694	21136.2	11.2658	111873						0.342078	-0.00212983
	11.076	50638.1		0.359622	-5.02e-05			16.9745	21100.3								0.347341	-0.00217159
	11.0845	50634.7		0.368394	-5.03e-05			16.9796	21080.6								0.352605	-0.00201412
	11.0931	50617.3		0.377166	-4.97e-05			16.9848	21077								0.357868	-0.00172001
	11.1016	50564.4		0.385938	-4.74e-05			16.9899	21047.1								0.363131	-0.00119211
	11.1101	50492.7		0.39471	-4.58e-05			16.995	21014.7								0.368394	-0.0009894
	11.1187	50419.7		0.403482	-4.48e-05			17.0001	21002.1								0.373657	-0.000906145
	11.1272	50365.7		0.412254	-4.34e-05			17.0052	21002.4								0.378921	-0.00089938
	11.1357	50317.1		0.421026	-4.21e-05			17.0104	21010.9								0.384184	-0.000912076
	11.1443	50249.7		0.429798	-4.12e-05			17.0155	21016.4								0.389447	-0.000924771
	11.1528	50223.2		0.43857	-4e-05			17.0206	21041.3								0.39471	-0.00100542
	11.1613	50218.5		0.447342	-3.86e-05			17.0257	21069.6								0.399973	-0.00108606
	11.1699	50185.8		0.456114	-3.49e-05			17.0308	21074.4								0.405237	-0.00126231
	11.1784	50121.9		0.464886	-3.17e-05			17.036	21059.1								0.4105	-0.00164907
	11.1869	50042.2		0.473658	-3.06e-05			17.0411	21022.2								0.415763	-0.00180527
	11.1955	49977.1		0.48243	-2.88e-05			17.0462	20975								0.421026	-0.00172812
	11.204	49925.3		0.491202	-2.6e-05			17.0513	20942								0.426289	-0.00147713
	11.2125	49874.7		0.499974	-2.49e-05			17.0564	20942.6								0.431553	-0.00102506
	11.2211	49818.6		0.508746	-2.46e-05			17.0616	20948.7								0.436816	-0.000521048
	11.2296	49780.9		0.517518	-2.2e-05												0.442079	-0.000521206
	11.2381	49803.1		0.52629	-1.83e-05			10.8766	127711								0.447342	-0.000543339
	11.2467	49833		0.535062	-1.51e-05			10.8818	127396								0.452605	-0.000565471
	11.2552	49795.5		0.543834	-1.31e-05			10.8869	127219								0.457869	-0.000639348
	11.2637	49733.7		0.552606	-1.07e-05			10.892	127066								0.463132	-0.000693833
	11.2723	49710.7		0.561378	-8.59e-06			10.8971	126855								0.468395	-0.000748319
	11.2808	49694.5		0.57015	-8.13e-06			10.9022	126623								0.473658	-0.000860851
	11.2893	49647.8		0.578922	-6.96e-06			10.9074	126438								0.478921	-0.00129341
	11.2979	49600.1		0.587694	-4.26e-06			10.9125	126341								0.484185	-0.00154602
	11.3064	49629.8		0.596466	-1.26e-06			10.9176	126282								0.489448	-0.00151966
	11.3149	49754.1		0.605238	1.31e-06			10.9227	126276								0.494711	-0.00132636
	11.3235	49811.9		0.61401	2.9e-06			10.9278	126256								0.499974	-0.000965868
	11.332	49742.6		0.622782	5.21e-06			10.933	126097								0.505237	-0.000451924
	11.3405	49684		0.631554	8.07e-06			10.9381	125862								0.510501	-0.000318936
	11.3491	49691.8		0.640326	9.07e-06			10.9432	125576								0.515764	-0.000275865
	11.3576	49745.7		0.649098	9.58e-06			10.9483	125196								0.521027	-0.000310032
	11.3661	49794.5		0.65787	1.14e-05			10.9534	124972								0.52629	-0.0003442
	11.3747	49831.7		0.666642	1.52e-05			10.9586	124763								0.531553	-0.000433964
	11.3832	49895.5		0.675414	1.88e-05			10.9637	124583								0.536817	-0.000456137
	11.3917	49928.9		0.684186	2e-05			10.9688	124385								0.54208	-0.000624851
	11.4003	49918.1		0.692958	2.21e-05			10.9739	124201								0.547343	-0.00108499
	11.4088	49978.3		0.70173	2.42e-05			10.979	123890								0.552606	-0.00147762
	11.4173	50046.8		0.710502	2.53e-05			10.9842	123658								0.557869	-0.00153916
	11.4259	50018.7		0.719274	2.67e-05			10.9893	123634								0.563133	-0.0013536
	11.4344	49989		0.728046	2.93e-05			10.9944	123629								0.568396	-0.00108607
	11.4429	49970.2		0.736818	3.3e-05			10.9995	123461								0.573659	-0.000678753
	11.4515	49977.8		0.74559	3.59e-05			11.0046	123108								0.578922	-0.000507443
	11.46	50057.9		0.754362	3.74e-05			11.0098	122706								0.584185	-0.000452552
	11.4685	50122.9		0.763134	3.85e-05			11.0149	122295								0.589449	-0.000489406
	11.4771	50165.3		0.771906	4.05e-05			11.02	121932								0.594712	-0.000526259
	11.4856	50257.2		0.780678	4.17e-05			11.0251	121690								0.599975	-0.000614416
	11.4941	50357		0.78945	4.21e-05			11.0302	121383								0.605238	-0.000730501
	11.5027	50438.1		0.798222	4.37e-05			11.0354	121200								0.610501	-0.000846586
	11.5112	50633.7		0.806994	4.63e-05			11.0405	120999								0.615765	-0.00107941
	11.5197	50864.4		0.815766	4.85e-05			11.0456	120734								0.621028	-0.00146781
	11.5283	50633.2		0.824538	4.99e-05			11.0507	120491								0.626291	-0.00161871
				0.83331	5.08e-05			11.0558	120411								0.631554	-0.00160568
				0.842082	5.08e-05			11.061	120386								0.636817	-0.00146936
				0.850854	5.07e-05			11.0661	120328								0.642081	-0.00110172
				0.859626	5.05e-05			11.0712	120180								0.647344	-0.000937724
				0.868398	5.07e-05			11.0763	119993								0.652607	-0.000902562
				0.87717	5.31e-05			11.0814	119731								0.65787	-0.000979122
				0.885942	5.34e-05			11.0866	119457								0.663133	-0.00105568
				0.894714	5.36e-05			11.0917	119091								0.668397	-0.00123897
				0.903486	5.37e-05			11.0968	118784								0.67366	-0.00126919
				0.912258	5.35e-05			11.1019	118663								0.678923	-0.00139296
				0.92103	5.32e-05			11.107	118480								0.684186	-0.00151674
				0.929802	5.28e-05			11.1122	118283								0.689449	-0.00200129
				0.938574	5.29e-05			11.1173	117982								0.694713	-0.00229831
				0.947346	5.51e-05			11.1224	117574								0.699976	-0.00228125
				0.956118	5.65e-05			11.1275	117096								0.705239	-0.00207174
				0.96489	5.68e-05			11.1326	116723								0.710502	-0.00167817
				0.973662	5.67e-05			11.1378	116517								0.715765	-0.00114466
				0.982434	5.64e-05			11.1429	116456								0.721029	-0.00102652
				0.991206	5.62e-05			11.148	116116								0.726292	-0.00105636
				0.999978	5.58e-05			11.1531	115626								0.731555	-0.00108619
				1.00875	5.51e-05			11.1582	115165								0.736818	-0.00113207
				1.01752	5.58e-05			11.1634	114879								0.742081	-0.00116794
				1.02629	5.56e-05			11.1685	114711								0.747345	-0.00122936
				1.03507	5.54e-05			11.1736	114590								0.752608	-0.00129078
				1.04384	5.5e-05			11.1787	114547								0.757871	-0.00171774
				1.05261	5.4e-05			11.1838	114542								0.763134	-0.00201348
				1.06138	5.27e-05			11.189	114480								0.768397	-0.00205832
				1.07015	5.04e-05			11.1941	114483								0.773661	-0.00192293
				1.07893	4.89e-05			11.1992	114561								0.778924	-0.00163219
				1.0877	5.01e-05			11.2043	114640								0.784187	-0.00114572
				1.09647	5e-05			11.2094	114586								0.78945	-0.000975175
				1.10524	4.98e-05			11.2146	114427								0.794713	-0.000911357
				1.11401	4.97e-05			11.2197	114104								0.799977	-0.00090612
				1.12279	4.95e-05			11.2248	113712								0.80524	-0.000900883
				1.13156	4.93e-05			11.2299	113366								0.810503	-0.000925713
				1.14033	4.89e-05			11.235	113188								0.815766	-0.000950543
				1.1491	5e-05			11.2402	113102								0.821029	-0.0010051
				1.15787	5.03e-05			11.2453	112978								0.826293	-0.00140959
				1.16665	4.99e-05			11.2504	112766								0.831556	-0.00179369
				1.17542	4.94e-05			11.2555	112543								0.836819	-0.0018108
				1.18419	4.87e-05			11.2606	112383								0.842082	-0.00165151
				1.19296	4.77e-05			11.2658	111873								0.847345	-0.00143007
				1.20173	4.61e-05												0.852609	-0.000979121
				1.21051	4.5e-05			9.79633	207063								0.857872	-0.000505724
				1.21928	4.49e-05			9.80145	206690								0.863135	-0.000510812
				1.22805	4.48e-05			9.80657	206180								0.868398	-0.000523969
				1.23682	4.46e-05			9.81169	205487								0.873661	-0.000546298
				1.24559	4.44e-05			9.81681	204722								0.878925	-0.000568627
				1.25437	4.39e-05			9.82193	203891								0.884188	-0.000600129
				1.26314	4.35e-05			9.82705	203002								0.889451	-0.000664173
				1.27191	4.21e-05			9.83217	202207								0.894714	-0.000986107
				1.28068	3.92e-05			9.83729	201571								0.899977	-0.00141899
				1.28945	3.88e-05			9.84241	200924								0.905241	-0.00162371
				1.29823	3.82e-05			9.84753	200291								0.910504	-0.0016442
				1.307	3.76e-05			9.85265	199689								0.915767	-0.00145535
				1.31577	3.65e-05			9.85777	199027								0.92103	-0.00110065
				1.32454	3.55e-05			9.86289	198442								0.926294	-0.000693831
				1.33331	3.52e-05			9.86801	198114								0.931557	-0.000718733
				1.34209	3.3e-05			9.87313	197813								0.93682	-0.000743634
				1.35086	3.09e-05			9.87825	197409								0.942083	-0.000816615
				1.35963	3.11e-05			9.88337	196908								0.947346	-0.000935582
				1.3684	3.11e-05			9.88849	196349								0.95261	-0.000986947
				1.37717	3.08e-05			9.89361	195682								0.957873	-0.00106866
				1.38595	3.05e-05			9.89873	194928								0.963136	-0.00115037
				1.39472	3.03e-05			9.90385	194321								0.968399	-0.00162644
				1.40349	2.98e-05			9.90897	193846								0.973662	-0.00200717
				1.41226	2.92e-05			9.91409	193404								0.978926	-0.00205471
				1.42103	2.83e-05			9.91921	192900								0.984189	-0.00191383
				1.42981	2.82e-05			9.92433	192369								0.989452	-0.00165019
				1.43858	2.83e-05			9.92945	191874								0.994715	-0.00114452
				1.44735	2.82e-05			9.93457	191548								0.999978	-0.0009598
				1.45612	2.8e-05			9.93969	191315								1.00524	-0.000882353
				1.46489	2.6e-05			9.94481	190952								1.0105	-0.000880602
				1.47367	2.38e-05			9.94993	190488								1.01577	-0.000897996
				1.48244	2.16e-05			9.95505	189960								1.02103	-0.000915389
				1.49121	2.04e-05			9.96017	189369								1.02629	-0.000944028
				1.49998	1.97e-05			9.96529	188605								1.03156	-0.000972666
				1.50875	2.04e-05			9.97041	187914								1.03682	-0.00139312
				1.51753	2.05e-05			9.97553	187348								1.04208	-0.00173778
				1.5263	2.04e-05			9.98065	186930								1.04735	-0.00178521
				1.53507	2e-05			9.98577	186542								1.05261	-0.00166861
				1.54384	1.96e-05			9.99089	186169								1.05787	-0.00145105
				1.55261	1.9e-05			9.99601	185759								1.06314	-0.000983864
				1.56139	1.73e-05			10.0011	185216								1.0684	-0.000749197
				1.57016	1.72e-05			10.0062	184733								1.07366	-0.000646685
				1.57893	1.85e-05			10.0114	184425								1.07893	-0.00063747
				1.5877	2e-05			10.0165	184026								1.08419	-0.000663864
				1.59647	2.03e-05			10.0216	183501								1.08945	-0.000690259
				1.60525	2.05e-05			10.0267	182920								1.09472	-0.000706089
				1.61402	2.01e-05			10.0318	182281								1.09998	-0.000721919
				1.62279	1.97e-05			10.037	181691								1.10524	-0.00106486
				1.63156	1.88e-05			10.0421	181028								1.11051	-0.00151984
				1.64033	1.95e-05			10.0472	180433								1.11577	-0.00179569
				1.64911	2.07e-05			10.0523	179972								1.12103	-0.00182588
				1.65788	2.1e-05			10.0574	179491								1.1263	-0.00164208
				1.66665	2.14e-05			10.0626	179026								1.13156	-0.00125995
				1.67542	2.16e-05			10.0677	178585								1.13682	-0.000772158
				1.68419	2.15e-05			10.0728	178279								1.14208	-0.00075763
				1.69297	2.13e-05			10.0779	178200								1.14735	-0.000763604
				1.70174	2.12e-05			10.083	177910								1.15261	-0.000815463
				1.71051	2.1e-05			10.0882	177439								1.15787	-0.000867323
				1.71928	2.09e-05			10.0933	176877								1.16314	-0.000918832
				1.72805	2.07e-05			10.0984	176273								1.1684	-0.00100869
				1.73683	2.05e-05			10.1035	175597								1.17366	-0.00109856
				1.7456	1.94e-05			10.1086	174983								1.17893	-0.00158218
				1.75437	1.86e-05												1.18419	-0.00197906
				1.76314	1.67e-05			9.02321	364811								1.18945	-0.00203657
				1.77191	1.54e-05			9.02833	362606								1.19472	-0.00185464
				1.78069	1.63e-05			9.03345	360383								1.19998	-0.00153168
				1.78946	1.7e-05			9.03857	358155								1.20524	-0.00100916
				1.79823	1.74e-05			9.04369	355475								1.21051	-0.000858671
				1.807	1.88e-05			9.04881	352594								1.21577	-0.000817154
				1.81577	2.01e-05			9.05393	349558								1.22103	-0.000868038
				1.82455	2.05e-05			9.05905	346690								1.2263	-0.000918922
				1.83332	2.06e-05			9.06417	344420								1.23156	-0.000963179
				1.84209	2.07e-05			9.06929	342626								1.23682	-0.00106664
				1.85086	2.27e-05			9.07441	340818								1.24209	-0.00117011
				1.85963	2.57e-05			9.07953	338919								1.24735	-0.00138573
				1.86841	2.57e-05			9.08465	336995								1.25261	-0.00178962
				1.87718	2.58e-05			9.08977	334967								1.25788	-0.00185575
				1.88595	2.61e-05			9.09489	333195								1.26314	-0.0017421
				1.89472	2.61e-05			9.10001	331569								1.2684	-0.00153788
				1.90349	2.61e-05			9.10513	330028								1.27366	-0.00108656
				1.91227	2.68e-05			9.11025	328405								1.27893	-0.000898332
				1.92104	2.87e-05			9.11537	326644								1.28419	-0.000821748
				1.92981	3.02e-05			9.12049	324505								1.28945	-0.000849492
				1.93858	3.23e-05			9.12561	322342								1.29472	-0.000877235
				1.94735	3.43e-05			9.13073	320431								1.29998	-0.000978823
				1.95613	3.6e-05			9.13585	318805								1.30524	-0.000995924
				1.9649	3.74e-05			9.14097	317269								1.31051	-0.00102975
				1.97367	3.75e-05			9.14609	315711								1.31577	-0.00138125
				1.98244	3.76e-05			9.15121	314104								1.32103	-0.00184318
				1.99121	3.89e-05			9.15633	312338								1.3263	-0.00205908
				1.99999	4.18e-05			9.16145	310781								1.33156	-0.00204513
				2.00876	4.31e-05			9.16657	309503								1.33682	-0.00189971
				2.01753	4.3e-05			9.17169	308378								1.34209	-0.00153213
				2.0263	4.24e-05			9.17681	307090								1.34735	-0.00106917
				2.03507	4.17e-05			9.18193	305539								1.35261	-0.00106653
				2.04385	4.02e-05			9.18705	303863								1.35788	-0.0010789
				2.05262	3.83e-05			9.19217	302079								1.36314	-0.00112955
				2.06139	3.79e-05			9.19729	300335								1.3684	-0.00118021
				2.07016	3.92e-05			9.20241	298887								1.37367	-0.00119691
				2.07893	3.97e-05			9.20753	297686								1.37893	-0.00128413
				2.08771	4.01e-05			9.21265	296521								1.38419	-0.00137134
				2.09648	4.03e-05			9.21777	295244								1.38946	-0.00182373
				2.10525	4.09e-05			9.22289	293949								1.39472	-0.0021322
				2.11402	4.16e-05			9.22801	292636								1.39998	-0.00213852
				2.12279	4.23e-05			9.23313	291527								1.40524	-0.00196042
				2.13157	4.4e-05			9.23825	290703								1.41051	-0.00167167
				2.14034	4.69e-05			9.24337	290103								1.41577	-0.00122232
				2.14911	4.86e-05			9.24849	289284								1.42103	-0.00110335
				2.15788	4.91e-05			9.25361	288224								1.4263	-0.00112993
				2.16665	5.05e-05			9.25873	286798								1.43156	-0.00115651
				2.17543	5.19e-05			9.26385	285161								1.43682	-0.00120553
				2.1842	5.32e-05			9.26897	283403								1.44209	-0.00121412
				2.19297	5.38e-05			9.27409	281893								1.44735	-0.00130016
				2.20174	5.57e-05			9.27921	280668								1.45261	-0.00138621
				2.21051	5.91e-05			9.28433	279544								1.45788	-0.00157796
				2.21929	6.07e-05			9.28945	278377								1.46314	-0.00198056
				2.22806	6.11e-05			9.29457	277124								1.4684	-0.00209321
				2.23683	6.18e-05			9.29969	276265								1.47367	-0.00197393
				2.2456	6.17e-05			9.30481	275580								1.47893	-0.00173191
				2.25437	6.14e-05			9.30993	274971								1.48419	-0.00125299
				2.26315	6.11e-05			9.31505	274264								1.48946	-0.000818674
				2.27192	6.16e-05			9.32017	273295								1.49472	-0.00085008
				2.28069	6.39e-05			9.32529	272002								1.49998	-0.000881486
				2.28946	6.59e-05			9.33041	270452								1.50525	-0.000938095
				2.29823	6.59e-05			9.33553	268844								1.51051	-0.00103599
				2.30701	6.69e-05			9.34065	267748								1.51577	-0.0010549
				2.31578	6.76e-05			9.34577	266767								1.52104	-0.00107382
				2.32455	6.82e-05			9.35089	265655								1.5263	-0.00142885
				2.33332	6.81e-05			9.35601	264624								1.53156	-0.00186458
				2.34209	6.94e-05			9.36113	263652								1.53682	-0.00206142
				2.35087	7.25e-05			9.36625	262636								1.54209	-0.00198478
				2.35964	7.43e-05			9.37137	261778								1.54735	-0.00178083
				2.36841	7.47e-05			9.37649	261263								1.55261	-0.00140402
				2.37718	7.62e-05			9.38161	260571								1.55788	-0.000994488
				2.38595	7.61e-05												1.56314	-0.000959381
				2.39473	7.58e-05												1.5684	-0.000991151
				2.4035	7.56e-05												1.57367	-0.00102292
				2.41227	7.65e-05												1.57893	-0.0010739
				2.42104	7.76e-05												1.58419	-0.00114347
				2.42981	7.8e-05												1.58946	-0.00125137
				2.43859	7.8e-05												1.59472	-0.00135927
				2.44736	7.78e-05												1.59998	-0.00181802
				2.45613	7.76e-05												1.60525	-0.00214746
				2.4649	7.74e-05												1.61051	-0.0022069
				2.47367	7.52e-05												1.61577	-0.00206838
				2.48245	7.52e-05												1.62104	-0.00177075
				2.49122	7.5e-05												1.6263	-0.00129405
				2.49999	7.48e-05												1.63156	-0.00116393
				2.50876	7.43e-05												1.63683	-0.00119921
				2.51753	7.4e-05												1.64209	-0.00123449
				2.52631	7.36e-05												1.64735	-0.00130195
				2.53508	7.31e-05												1.65262	-0.00137908
				2.54385	7.17e-05												1.65788	-0.00145306
				2.55262	7.33e-05												1.66314	-0.00152704
				2.56139	7.4e-05												1.6684	-0.0020127
				2.57017	7.42e-05												1.67367	-0.00244742
				2.57894	7.44e-05												1.67893	-0.00254605
				2.58771	7.43e-05												1.68419	-0.00239865
				2.59648	7.42e-05												1.68946	-0.00214762
				2.60525	7.34e-05												1.69472	-0.00165863
				2.61403	7.25e-05												1.69998	-0.00145392
				2.6228	7.25e-05												1.70525	-0.0013766
				2.63157	7.29e-05												1.71051	-0.00141444
				2.64034	7.27e-05												1.71577	-0.00145228
				2.64911	7.25e-05												1.72104	-0.00152746
				2.65789	7.18e-05												1.7263	-0.00158875
				2.66666	7.1e-05												1.73156	-0.00165003
				2.67543	6.93e-05												1.73683	-0.0018049
				2.6842	6.68e-05												1.74209	-0.00215032
				2.69297	6.59e-05												1.74735	-0.00227358
				2.70174	6.43e-05												1.75262	-0.00217005
				2.71052	6.31e-05												1.75788	-0.00195062
				2.71929	6.14e-05												1.76314	-0.00150729
				2.72806	5.93e-05												1.76841	-0.000979871
				2.73683	5.79e-05												1.77367	-0.000980214
				2.7456	5.55e-05												1.77893	-0.000991456
				2.75438	5.16e-05												1.7842	-0.0010267
				2.76315	5.03e-05												1.78946	-0.00106194
				2.77192	5.01e-05												1.79472	-0.0010915
				2.78069	4.99e-05												1.79998	-0.00115883
				2.78946	4.88e-05												1.80525	-0.00122615
				2.79824	4.76e-05												1.81051	-0.00169208
				2.80701	4.66e-05												1.81577	-0.00199219
				2.81578	4.52e-05												1.82104	-0.00201012
				2.82455	4.35e-05												1.8263	-0.00186344
				2.83332	4.26e-05												1.83156	-0.00153936
				2.8421	4.22e-05												1.83683	-0.0010402
				2.85087	4.18e-05												1.84209	-0.000925946
				2.85964	3.91e-05												1.84735	-0.000961139
				2.86841	3.77e-05												1.85262	-0.000996331
				2.87718	3.63e-05												1.85788	-0.00106858
				2.88596	3.24e-05												1.86314	-0.00114064
				2.89473	2.96e-05												1.86841	-0.0012181
				2.9035	2.87e-05												1.87367	-0.00129557
				2.91227	2.73e-05												1.87893	-0.00178543
				2.92104	2.59e-05												1.8842	-0.00216607
				2.92982	2.41e-05												1.88946	-0.00222404
				2.93859	2.14e-05												1.89472	-0.00206199
				2.94736	1.9e-05												1.89999	-0.00179947
				2.95613	1.59e-05												1.90525	-0.0012893
				2.9649	1.26e-05												1.91051	-0.00108571
				2.97368	1.22e-05												1.91578	-0.00100738
				2.98245	1.14e-05												1.92104	-0.00103432
				2.99122	1.06e-05												1.9263	-0.00106125
				2.99999	8.15e-06												1.93156	-0.00108493
				3.00876	6.47e-06												1.93683	-0.00115817
				3.01754	4.22e-06												1.94209	-0.00123141
				3.02631	1.57e-06												1.94735	-0.00139971
				3.03508	-1.74e-06												1.95262	-0.00180329
				3.04385	-3.51e-06												1.95788	-0.00193403
				3.05262	-4.05e-06												1.96314	-0.00185261
				3.0614	-4.59e-06												1.96841	-0.00167715
				3.07017	-7.14e-06												1.97367	-0.0012585
				3.07894	-8.33e-06												1.97893	-0.000793335
				3.08771	-9.4e-06												1.9842	-0.000811812
				3.09648	-1.29e-05												1.98946	-0.000830288
				3.10526	-1.62e-05												1.99472	-0.000853484
				3.11403	-1.8e-05												1.99999	-0.000921593
				3.1228	-1.93e-05												2.00525	-0.000966738
				3.13157	-2.06e-05												2.01051	-0.000986215
				3.14034	-2.28e-05												2.01578	-0.00124398
				3.14912	-2.52e-05												2.02104	-0.00171147
				3.15789	-2.75e-05												2.0263	-0.001983
				3.16666	-3.06e-05												2.03157	-0.00191404
				3.17543	-3.43e-05												2.03683	-0.00166658
				3.1842	-3.5e-05												2.04209	-0.00125829
				3.19298	-3.58e-05												2.04736	-0.000740341
				3.20175	-3.66e-05												2.05262	-0.00069705
				3.21052	-3.88e-05												2.05788	-0.000683634
				3.21929	-3.99e-05												2.06314	-0.000723728
				3.22806	-4.22e-05												2.06841	-0.000763823
				3.23684	-4.56e-05												2.07367	-0.000784094
				3.24561	-4.78e-05												2.07893	-0.000825108
				3.25438	-4.88e-05												2.0842	-0.000866123
				3.26315	-4.9e-05												2.08946	-0.00129103
				3.27192	-4.92e-05												2.09472	-0.00161567
				3.2807	-5.21e-05												2.09999	-0.00165222
				3.28947	-5.32e-05												2.10525	-0.00152742
				3.29824	-5.39e-05												2.11051	-0.00124689
				3.30701	-5.65e-05												2.11578	-0.00072032
				3.31578	-5.84e-05												2.12104	-0.000523159
				3.32456	-5.85e-05												2.1263	-0.000455027
				3.33333	-5.87e-05												2.13157	-0.000468423
				3.3421	-5.98e-05												2.13683	-0.000510412
				3.35087	-6.12e-05												2.14209	-0.000552401
				3.35964	-6.2e-05												2.14736	-0.000663265
				3.36842	-6.3e-05												2.15262	-0.000774128
				3.37719	-6.48e-05												2.15788	-0.00098331
				3.38596	-6.7e-05												2.16315	-0.00141504
				3.39473	-6.72e-05												2.16841	-0.0015451
				3.4035	-6.74e-05												2.17367	-0.00144414
				3.41228	-6.77e-05												2.17894	-0.00119951
				3.42105	-6.83e-05												2.1842	-0.00072621
				3.42982	-6.86e-05												2.18946	-0.00023961
				3.43859	-6.89e-05												2.19472	-0.000243429
				3.44736	-6.96e-05												2.19999	-0.000266569
				3.45614	-7.08e-05												2.20525	-0.000289709
				3.46491	-7.04e-05												2.21051	-0.000355631
				3.47368	-7.02e-05												2.21578	-0.000398741
				3.48245	-7.05e-05												2.22104	-0.000441851
				3.49122	-7.08e-05												2.2263	-0.00056571
				3.5	-7.25e-05												2.23157	-0.000977913
				3.50877	-7.3e-05												2.23683	-0.00113574
				3.51754	-7.34e-05												2.24209	-0.00107512
				3.52631	-7.5e-05												2.24736	-0.000951329
				3.53508	-7.37e-05												2.25262	-0.000608798
				3.54386	-7.3e-05												2.25788	-6.43572e-05
				3.55263	-7.22e-05												2.26315	2.09514e-05
				3.5614	-7.24e-05												2.26841	3.20544e-05
				3.57017	-7.23e-05												2.27367	1.39569e-05
				3.57894	-7.24e-05												2.27894	-4.14067e-06
				3.58772	-7.29e-05												2.2842	-3.11332e-05
				3.59649	-7.34e-05												2.28946	-9.841e-05
				3.60526	-7.25e-05												2.29473	-0.000165687
				3.61403	-7.19e-05												2.29999	-0.000621997
				3.6228	-7.18e-05												2.30525	-0.00092402
				3.63158	-7.19e-05												2.31052	-0.000925809
				3.64035	-7.25e-05												2.31578	-0.000742018
				3.64912	-7.31e-05												2.32104	-0.000480817
				3.65789	-7.56e-05												2.3263	-4.32686e-05
				3.66666	-7.66e-05												2.33157	0.000124457
				3.67544	-7.6e-05												2.33683	0.000191571
				3.68421	-7.55e-05												2.34209	0.000154376
				3.69298	-7.55e-05												2.34736	0.000117181
				3.70175	-7.54e-05												2.35262	5.50416e-05
				3.71052	-7.55e-05												2.35788	-4.76486e-05
				3.7193	-7.45e-05												2.36315	-0.000150339
				3.72807	-7.46e-05												2.36841	-0.000360946
				3.73684	-7.46e-05												2.37367	-0.00072008
				3.74561	-7.34e-05												2.37894	-0.000812975
				3.75438	-7.04e-05												2.3842	-0.000713821
				3.76316	-6.83e-05												2.38946	-0.000491922
				3.77193	-6.79e-05												2.39473	5.98699e-06
				3.7807	-6.7e-05												2.39999	0.000238624
				3.78947	-6.61e-05												2.40525	0.000341638
				3.79824	-6.6e-05												2.41052	0.000369022
				3.80702	-6.59e-05												2.41578	0.00036869
				3.81579	-6.46e-05												2.42104	0.000368359
				3.82456	-6.35e-05												2.42631	0.000301124
				3.83333	-6.31e-05												2.43157	0.000233889
				3.8421	-6.27e-05												2.43683	0.000100725
				3.85088	-6.31e-05												2.4421	-0.000307032
				3.85965	-6.35e-05												2.44736	-0.000561569
				3.86842	-6.44e-05												2.45262	-0.000535312
				3.87719	-6.54e-05												2.45788	-0.000333779
				3.88596	-6.45e-05												2.46315	4.35044e-05
				3.89474	-6.28e-05												2.46841	0.000524265
				3.90351	-6.16e-05												2.47367	0.000590227
				3.91228	-6.14e-05												2.47894	0.000608056
				3.92105	-6.1e-05												2.4842	0.000601819
				3.92982	-6.03e-05												2.48946	0.000581629
				3.9386	-6.04e-05												2.49473	0.000561438
				3.94737	-5.91e-05												2.49999	0.000463827
				3.95614	-5.57e-05												2.50525	0.000366216
				3.96491	-5.15e-05												2.51052	-8.56543e-05
				3.97368	-4.96e-05												2.51578	-0.000377449
				3.98246	-4.76e-05												2.52104	-0.000367785
				3.99123	-4.54e-05												2.52631	-0.000176214
				4	-4.37e-05												2.53157	0.000147828
				4.00877	-4.2e-05												2.53683	0.000613766
				4.01754	-3.96e-05												2.5421	0.000758717
				4.02632	-3.71e-05												2.54736	0.000809678
				4.03509	-3.37e-05												2.55262	0.000784109
				4.04386	-3.05e-05												2.55789	0.00075854
				4.05263	-2.97e-05												2.56315	0.000719484
				4.0614	-2.93e-05												2.56841	0.000701714
				4.07018	-2.92e-05												2.57368	0.000683944
				4.07895	-2.91e-05												2.57894	0.000301965
				4.08772	-2.88e-05												2.5842	-2.69544e-05
				4.09649	-2.63e-05												2.58946	-8.76089e-05
				4.10526	-2.36e-05												2.59473	7.20126e-05
				4.11404	-2.18e-05												2.59999	0.000294707
				4.12281	-2.05e-05												2.60525	0.000756089
				4.13158	-1.88e-05												2.61052	0.000998617
				4.14035	-1.68e-05												2.61578	0.00110576
				4.14912	-1.63e-05												2.62104	0.0011296
				4.1579	-1.49e-05												2.62631	0.00110723
				4.16667	-1.13e-05												2.63157	0.00108487
				4.17544	-7.99e-06												2.63683	0.00100557
				4.18421	-6.65e-06												2.6421	0.00092628
				4.19298	-5.72e-06												2.64736	0.000760361
				4.20176	-3.96e-06												2.65262	0.000340768
				4.21053	-2.48e-06												2.65789	0.000130805
				4.2193	-1.91e-06												2.66315	0.000196984
				4.22807	-1.93e-07												2.66841	0.000420366
				4.23684	2.2e-06												2.67368	0.000868356
				4.24562	4.6e-06												2.67894	0.00140723
				4.25439	6.61e-06												2.6842	0.0014958
				4.26316	7.68e-06												2.68947	0.00145429
				4.27193	9.98e-06												2.69473	0.00141279
				4.2807	1.01e-05												2.69999	0.00134389
				4.28948	1.02e-05												2.70526	0.00129672
				4.29825	1.08e-05												2.71052	0.00124954
				4.30702	1.4e-05												2.71578	0.00116862
				4.31579	1.59e-05												2.72104	0.000733099
				4.32456	1.72e-05												2.72631	0.000456024
				4.33334	1.86e-05												2.73157	0.000468926
				4.34211	1.94e-05												2.73683	0.000615565
				4.35088	1.94e-05												2.7421	0.000938318
				4.35965	1.94e-05												2.74736	0.00145185
				4.36842	1.93e-05												2.75262	0.00162516
				4.3772	2.05e-05												2.75789	0.00170204
				4.38597	2.14e-05												2.76315	0.00170287
				4.39474	2.17e-05												2.76841	0.00170369
				4.40351	2.17e-05												2.77368	0.00169668
				4.41228	2.16e-05												2.77894	0.00157917
				4.42106	2.09e-05												2.7842	0.00146166
				4.42983	2.01e-05												2.78947	0.0012348
				4.4386	2e-05												2.79473	0.000875441
				4.44737	2.07e-05												2.79999	0.000803889
				4.45614	2.11e-05												2.80526	0.000909941
				4.46492	2.1e-05												2.81052	0.00114392
				4.47369	2.09e-05												2.81578	0.00160284
				4.48246	2.03e-05												2.82105	0.00180207
				4.49123	1.96e-05												2.82631	0.00187255
				4.5	1.84e-05												2.83157	0.00187541
				4.50878	1.62e-05												2.83684	0.0018663
				4.51755	1.52e-05												2.8421	0.0018572
				4.52632	1.48e-05												2.84736	0.00179022
				4.53509	1.44e-05												2.85262	0.00172324
				4.54386	1.36e-05												2.85789	0.00157361
				4.55264	1.29e-05												2.86315	0.00114451
				4.56141	1.12e-05												2.86841	0.000957758
				4.57018	9.02e-06												2.87368	0.0010378
				4.57895	7.9e-06												2.87894	0.00126442
				4.58772	8.04e-06												2.8842	0.00172322
				4.5965	7.63e-06												2.88947	0.00225888
				4.60527	7.22e-06												2.89473	0.00227305
				4.61404	6.32e-06												2.89999	0.00227008
				4.62281	5.24e-06												2.90526	0.00225777
				4.63158	3.63e-06												2.91052	0.00224547
				4.64036	1.14e-06												2.91578	0.00222497
				4.64913	-6.53e-07												2.92105	0.00220447
				4.6579	-2.12e-06												2.92631	0.00213688
				4.66667	-3.09e-06												2.93157	0.00168211
				4.67544	-4.21e-06												2.93684	0.00143572
				4.68422	-6.36e-06												2.9421	0.00148724
				4.69299	-8.68e-06												2.94736	0.00163549
				4.70176	-1.02e-05												2.95263	0.00187888
				4.71053	-1.25e-05												2.95789	0.00230339
				4.7193	-1.5e-05												2.96315	0.00243034
				4.72808	-1.5e-05												2.96842	0.00246962
				4.73685	-1.53e-05												2.97368	0.00243153
				4.74562	-1.56e-05												2.97894	0.00239343
				4.75439	-1.63e-05												2.9842	0.00235055
				4.76316	-1.68e-05												2.98947	0.0022827
				4.77194	-1.73e-05												2.99473	0.00221485
				4.78071	-1.99e-05												2.99999	0.00176363
				4.78948	-2.22e-05												3.00526	0.00136884
				4.79825	-2.34e-05												3.01052	0.00129518
				4.80702	-2.41e-05												3.01578	0.00141455
				4.8158	-2.48e-05												3.02105	0.00165911
				4.82457	-2.64e-05												3.02631	0.00216821
				4.83334	-2.69e-05												3.03157	0.00237287
				4.84211	-2.81e-05												3.03684	0.00246489
				4.85088	-3.03e-05												3.0421	0.00248192
				4.85966	-3.26e-05												3.04736	0.00249894
				4.86843	-3.27e-05												3.05263	0.00250262
				4.8772	-3.32e-05												3.05789	0.00240238
				4.88597	-3.38e-05												3.06315	0.00230213
				4.89474	-3.47e-05												3.06842	0.00211307
				4.90352	-3.6e-05												3.07368	0.00173717
				4.91229	-3.79e-05												3.07894	0.00160977
				4.92106	-4.03e-05												3.08421	0.00169072
				4.92983	-4.24e-05												3.08947	0.00191858
				4.9386	-4.25e-05												3.09473	0.00235091
				4.94738	-4.29e-05												3.1	0.0028267
				4.95615	-4.33e-05												3.10526	0.00281972
				4.96492	-4.43e-05												3.11052	0.00279601
				4.97369	-4.45e-05												3.11578	0.00277229
				4.98246	-4.53e-05												3.12105	0.0027124
				4.99124	-4.7e-05												3.12631	0.0026485
				5.00001	-4.83e-05												3.13157	0.00258459
				5.00878	-4.84e-05												3.13684	0.00246901
				5.01755	-4.87e-05												3.1421	0.00198866
				5.02632	-4.91e-05												3.14736	0.00167949
				5.0351	-5.09e-05												3.15263	0.00166094
				5.04387	-5.15e-05												3.15789	0.00185362
				5.05264	-5.21e-05												3.16315	0.0022247
				5.06141	-5.44e-05												3.16842	0.00276075
				5.07018	-5.44e-05												3.17368	0.00280958
				5.07896	-5.33e-05												3.17894	0.00282169
				5.08773	-5.35e-05												3.18421	0.00276693
				5.0965	-5.37e-05												3.18947	0.00271217
				5.10527	-5.44e-05												3.19473	0.00269701
				5.11404	-5.46e-05												3.2	0.00268184
				5.12282	-5.51e-05												3.20526	0.00266444
				5.13159	-5.56e-05												3.21052	0.00223674
				5.14036	-5.58e-05												3.21579	0.00191436
				5.14913	-5.45e-05												3.22105	0.00189395
				5.1579	-5.22e-05												3.22631	0.00207322
				5.16668	-5.19e-05												3.23158	0.00234472
				5.17545	-5.17e-05												3.23684	0.00280633
				5.18422	-5.16e-05												3.2421	0.00298223
				5.19299	-5.16e-05												3.24736	0.00304168
				5.20176	-5.17e-05												3.25263	0.00301708
				5.21054	-5.18e-05												3.25789	0.00299249
				5.21931	-5.04e-05												3.26315	0.00290946
				5.22808	-4.93e-05												3.26842	0.00288998
				5.23685	-4.88e-05												3.27368	0.00287049
				5.24562	-4.84e-05												3.27894	0.00244248
				5.2544	-4.86e-05												3.28421	0.00197857
				5.26317	-4.88e-05												3.28947	0.00179814
				5.27194	-4.96e-05												3.29473	0.00191757
				5.28071	-5.01e-05												3.3	0.00213233
				5.28948	-4.83e-05												3.30526	0.00253296
				5.29826	-4.67e-05												3.31052	0.00297904
				5.30703	-4.64e-05												3.31579	0.00295871
				5.3158	-4.64e-05												3.32105	0.00293839
				5.32457	-4.64e-05												3.32631	0.00290075
				5.33334	-4.61e-05												3.33158	0.00285504
				5.34212	-4.6e-05												3.33684	0.00278084
				5.35089	-4.56e-05												3.3421	0.00270664
				5.35966	-4.3e-05												3.34737	0.00255885
				5.36843	-4.12e-05												3.35263	0.00206021
				5.3772	-4.07e-05												3.35789	0.00178652
				5.38598	-3.97e-05												3.36316	0.0018361
				5.39475	-3.82e-05												3.36842	0.00205967
				5.40352	-3.74e-05												3.37368	0.00244581
				5.41229	-3.74e-05												3.37894	0.00295715
				5.42106	-3.65e-05												3.38421	0.00309916
				5.42984	-3.53e-05												3.38947	0.00315422
				5.43861	-3.48e-05												3.39473	0.00316368
				5.44738	-3.47e-05												3.4	0.00317313
				5.45615	-3.47e-05												3.40526	0.0031548
				5.46492	-3.47e-05												3.41052	0.00313646
				5.4737	-3.51e-05												3.41579	0.00310047
				5.48247	-3.55e-05												3.42105	0.00265234
				5.49124	-3.66e-05												3.42631	0.0023307
				5.50001	-3.54e-05												3.43158	0.00234086
				5.50878	-3.43e-05												3.43684	0.00246885
				5.51756	-3.43e-05												3.4421	0.00267565
				5.52633	-3.44e-05												3.44737	0.00314399
				5.5351	-3.43e-05												3.45263	0.00333195
				5.54387	-3.43e-05												3.45789	0.00341575
				5.55264	-3.42e-05												3.46316	0.00341689
				5.56142	-3.39e-05												3.46842	0.00340573
				5.57019	-3.22e-05												3.47368	0.00338549
				5.57896	-2.99e-05												3.47895	0.00336525
				5.58773	-2.85e-05												3.48421	0.00333591
				5.5965	-2.76e-05												3.48947	0.00294284
				5.60528	-2.61e-05												3.49474	0.00253238
				5.61405	-2.61e-05												3.5	0.00239272
				5.62282	-2.61e-05												3.50526	0.002502
				5.63159	-2.62e-05												3.51052	0.00269804
				5.64036	-2.5e-05												3.51579	0.00310701
				5.64914	-2.49e-05												3.52105	0.00356258
				5.65791	-2.49e-05												3.52631	0.00353349
				5.66668	-2.5e-05												3.53158	0.00350439
				5.67545	-2.52e-05												3.53684	0.00345648
				5.68422	-2.54e-05												3.5421	0.00337204
				5.693	-2.75e-05												3.54737	0.00335567
				5.70177	-2.85e-05												3.55263	0.00323375
				5.71054	-2.78e-05												3.55789	0.00311183
				5.71931	-2.76e-05												3.56316	0.00264389
				5.72808	-2.77e-05												3.56842	0.00235245
				5.73686	-2.82e-05												3.57368	0.00236364
				5.74563	-2.87e-05												3.57895	0.00253512
				5.7544	-2.97e-05												3.58421	0.00284509
				5.76317	-3.21e-05												3.58947	0.00334196
				5.77194	-3.37e-05												3.59474	0.00347301
				5.78072	-3.36e-05												3.6	0.00346809
				5.78949	-3.36e-05												3.60526	0.00345091
				5.79826	-3.49e-05												3.61053	0.00343374
				5.80703	-3.61e-05												3.61579	0.00337473
				5.8158	-3.69e-05												3.62105	0.00329113
				5.82458	-3.81e-05												3.62632	0.00320752
				5.83335	-4.12e-05												3.63158	0.0027849
				5.84212	-4.33e-05												3.63684	0.00248907
				5.85089	-4.35e-05												3.6421	0.00249836
				5.85966	-4.37e-05												3.64737	0.00267716
				5.86844	-4.4e-05												3.65263	0.00299009
				5.87721	-4.62e-05												3.65789	0.00350164
				5.88598	-4.74e-05												3.66316	0.00368164
				5.89475	-4.9e-05												3.66842	0.00374738
				5.90352	-5.15e-05												3.67368	0.00371195
				5.9123	-5.27e-05												3.67895	0.00367652
				5.92107	-5.34e-05												3.68421	0.00362034
				5.92984	-5.46e-05												3.68947	0.00352221
				5.93861	-5.65e-05												3.69474	0.00342408
				5.94738	-5.81e-05												3.7	0.003234
				5.95616	-5.96e-05												3.70526	0.00288014
				5.96493	-6.24e-05												3.71053	0.00278427
				5.9737	-6.52e-05												3.71579	0.00288545
				5.98247	-6.76e-05												3.72105	0.00312814
				5.99124	-6.83e-05												3.72632	0.0035918
				6.00002	-6.92e-05												3.73158	0.00380826
				6.00879	-7.01e-05												3.73684	0.00390884
				6.01756	-7.35e-05												3.74211	0.00394658
				6.02633	-7.51e-05												3.74737	0.00395716
				6.0351	-7.6e-05												3.75263	0.00395224
				6.04388	-7.85e-05												3.7579	0.00391889
				6.05265	-8.01e-05												3.76316	0.00388554
				6.06142	-8.06e-05												3.76842	0.0035586
				6.07019	-8.1e-05												3.77368	0.00310244
				6.07896	-8.17e-05												3.77895	0.00284506
				6.08774	-8.3e-05												3.78421	0.00282844
				6.09651	-8.45e-05												3.78947	0.00300103
				6.10528	-8.68e-05												3.79474	0.00338472
				6.11405	-8.96e-05												3.8	0.00388599
				6.12282	-9.15e-05												3.80526	0.00390657
				6.1316	-9.19e-05												3.81053	0.0039005
				6.14037	-9.22e-05												3.81579	0.00382505
				6.14914	-9.33e-05												3.82105	0.0037496
				6.15791	-9.37e-05												3.82632	0.00369652
				6.16668	-9.4e-05												3.83158	0.00360178
				6.17546	-9.52e-05												3.83684	0.00350704
				6.18423	-9.68e-05												3.84211	0.00298299
				6.193	-9.77e-05												3.84737	0.00263355
				6.20177	-9.63e-05												3.85263	0.0025887
				6.21054	-9.58e-05												3.8579	0.00270314
				6.21932	-9.58e-05												3.86316	0.00298303
				6.22809	-9.59e-05												3.86842	0.00350388
				6.23686	-9.64e-05												3.87369	0.00366876
				6.24563	-9.68e-05												3.87895	0.00371436
				6.2544	-9.78e-05												3.88421	0.0036861
				6.26318	-9.84e-05												3.88948	0.00365784
				6.27195	-9.71e-05												3.89474	0.00359437
				6.28072	-9.69e-05												3.9	0.00354604
				6.28949	-9.69e-05												3.90526	0.00349772
				6.29826	-9.7e-05												3.91053	0.00306952
				6.30704	-9.73e-05												3.91579	0.00266912
				6.31581	-9.76e-05												3.92105	0.00252377
				6.32458	-9.94e-05												3.92632	0.00265831
				6.33335	-0.000100265												3.93158	0.00289357
				6.34212	-9.81e-05												3.93684	0.00328744
				6.3509	-9.81e-05												3.94211	0.00371837
				6.35967	-9.83e-05												3.94737	0.00370249
				6.36844	-9.86e-05												3.95263	0.00368661
				6.37721	-9.87e-05												3.9579	0.00366703
				6.38598	-9.88e-05												3.96316	0.00362833
				6.39476	-9.9e-05												3.96842	0.00354115
				6.40353	-9.91e-05												3.97369	0.00345397
				6.4123	-9.68e-05												3.97895	0.00328779
				6.42107	-9.66e-05												3.98421	0.00288799
				6.42984	-9.63e-05												3.98948	0.00270225
				6.43862	-9.6e-05												3.99474	0.0027453
				6.44739	-9.47e-05												4	0.002983
				6.45616	-9.42e-05												4.00527	0.00339809
				6.46493	-9.43e-05												4.01053	0.00391346
				6.4737	-9.37e-05												4.01579	0.00402028
				6.48248	-9.18e-05												4.02106	0.00401778
				6.49125	-9.11e-05												4.02632	0.0040021
				6.50002	-9.03e-05												4.03158	0.00398642
				6.50879	-8.93e-05												4.03684	0.00396539
				6.51756	-8.86e-05												4.04211	0.00392383
				6.52634	-8.84e-05												4.04737	0.00388228
				6.53511	-8.83e-05												4.05263	0.00340799
				6.54388	-8.71e-05												4.0579	0.00310512
				6.55265	-8.55e-05												4.06316	0.00308723
				6.56142	-8.32e-05												4.06842	0.00320335
				6.5702	-8.19e-05												4.07369	0.00347145
				6.57897	-8.09e-05												4.07895	0.00394193
				6.58774	-7.93e-05												4.08421	0.00409571
				6.59651	-7.94e-05												4.08948	0.00407403
				6.60528	-7.95e-05												4.09474	0.00405234
				6.61406	-7.9e-05												4.1	0.00400717
				6.62283	-7.71e-05												4.10527	0.00395169
				6.6316	-7.57e-05												4.11053	0.00392771
				6.64037	-7.54e-05												4.11579	0.00372278
				6.64914	-7.47e-05												4.12106	0.0032461
				6.65792	-7.43e-05												4.12632	0.00283547
				6.66669	-7.44e-05												4.13158	0.00269655
				6.67546	-7.46e-05												4.13685	0.00278475
				6.68423	-7.49e-05												4.14211	0.00303738
				6.693	-7.37e-05												4.14737	0.00355715
				6.70178	-7.22e-05												4.15264	0.00377396
				6.71055	-7.17e-05												4.1579	0.00385922
				6.71932	-7.15e-05												4.16316	0.00383362
				6.72809	-7.15e-05												4.16842	0.00380802
				6.73686	-7.16e-05												4.17369	0.00369262
				6.74564	-7.16e-05												4.17895	0.00363608
				6.75441	-7.13e-05												4.18421	0.00357955
				6.76318	-6.96e-05												4.18948	0.00341829
				6.77195	-6.74e-05												4.19474	0.0029609
				6.78072	-6.7e-05												4.2	0.00277014
				6.7895	-6.69e-05												4.20527	0.00281883
				6.79827	-6.7e-05												4.21053	0.0029888
				6.80704	-6.73e-05												4.21579	0.00337482
				6.81581	-6.77e-05												4.22106	0.00386435
				6.82458	-6.76e-05												4.22632	0.00390572
				6.83336	-6.57e-05												4.23158	0.00385515
				6.84213	-6.56e-05												4.23685	0.00380457
				6.8509	-6.55e-05												4.24211	0.00371383
				6.85967	-6.57e-05												4.24737	0.00359467
				6.86844	-6.6e-05												4.25264	0.00351221
				6.87722	-6.65e-05												4.2579	0.00342975
				6.88599	-6.72e-05												4.26316	0.00294801
				6.89476	-6.69e-05												4.26843	0.00265201
				6.90353	-6.56e-05												4.27369	0.00271455
				6.9123	-6.46e-05												4.27895	0.00290999
				6.92108	-6.44e-05												4.28422	0.0032229
				6.92985	-6.41e-05												4.28948	0.00372273
				6.93862	-6.47e-05												4.29474	0.00382937
				6.94739	-6.53e-05												4.3	0.00379413
				6.95616	-6.66e-05												4.30527	0.00375889
				6.96494	-6.67e-05												4.31053	0.00370181
				6.97371	-6.55e-05												4.31579	0.00368146
				6.98248	-6.51e-05												4.32106	0.00366111
				6.99125	-6.46e-05												4.32632	0.00362266
				7.00002	-6.46e-05												4.33158	0.00314281
				7.0088	-6.46e-05												4.33685	0.00275318
				7.01757	-6.47e-05												4.34211	0.00267141
				7.02634	-6.48e-05												4.34737	0.00277859
				7.03511	-6.39e-05												4.35264	0.00301322
				7.04388	-6.22e-05												4.3579	0.00353407
				7.05266	-6.03e-05												4.36316	0.003731
				7.06143	-6.02e-05												4.36843	0.00379289
				7.0702	-6.02e-05												4.37369	0.00376998
				7.07897	-6.04e-05												4.37895	0.00374707
				7.08774	-6.05e-05												4.38422	0.00369206
				7.09652	-6.11e-05												4.38948	0.00364419
				7.10529	-6.14e-05												4.39474	0.00359633
				7.11406	-5.96e-05												4.40001	0.00326656
				7.12283	-5.7e-05												4.40527	0.00285711
				7.1316	-5.6e-05												4.41053	0.00268513
				7.14038	-5.54e-05												4.4158	0.00279258
				7.14915	-5.38e-05												4.42106	0.00299754
				7.15792	-5.36e-05												4.42632	0.00338801
				7.16669	-5.34e-05												4.43158	0.00384589
				7.17546	-5.27e-05												4.43685	0.00391859
				7.18424	-4.92e-05												4.44211	0.00390157
				7.19301	-4.55e-05												4.44737	0.00388455
				7.20178	-4.39e-05												4.45264	0.00384381
				7.21055	-4.2e-05												4.4579	0.00382306
				7.21932	-3.95e-05												4.46316	0.00371196
				7.2281	-3.8e-05												4.46843	0.00360086
				7.23687	-3.59e-05												4.47369	0.00315143
				7.24564	-3.32e-05												4.47895	0.00286409
				7.25441	-2.95e-05												4.48422	0.00286609
				7.26318	-2.45e-05												4.48948	0.00309102
				7.27196	-2.09e-05												4.49474	0.00343327
				7.28073	-1.76e-05												4.50001	0.00391518
				7.2895	-1.34e-05												4.50527	0.00404012
				7.29827	-1.01e-05												4.51053	0.00399177
				7.30704	-7.35e-06												4.5158	0.00394343
				7.31582	-3.74e-06												4.52106	0.00386103
				7.32459	1.14e-06												4.52632	0.0037923
				7.33336	5.97e-06												4.53159	0.00372757
				7.34213	9.14e-06												4.53685	0.00366284
				7.3509	1.23e-05												4.54211	0.00313643
				7.35968	1.54e-05												4.54738	0.0027237
				7.36845	1.84e-05												4.55264	0.00264467
				7.37722	2.09e-05												4.5579	0.00273405
				7.38599	2.34e-05												4.56316	0.00293425
				7.39476	2.87e-05												4.56843	0.00335999
				7.40354	3.34e-05												4.57369	0.0035112
				7.41231	3.55e-05												4.57895	0.00353861
				7.42108	3.91e-05												4.58422	0.0034958
				7.42985	4.31e-05												4.58948	0.00345299
				7.43862	4.53e-05												4.59474	0.00336286
				7.4474	4.77e-05												4.60001	0.00333205
				7.45617	5.17e-05												4.60527	0.00330124
				7.46494	5.73e-05												4.61053	0.00292037
				7.47371	6.28e-05												4.6158	0.00246845
				7.48248	6.66e-05												4.62106	0.00226328
				7.49126	7.04e-05												4.62632	0.00230204
				7.50003	7.51e-05												4.63159	0.00250193
				7.5088	7.81e-05												4.63685	0.00298079
				7.51757	8.05e-05												4.64211	0.00347199
				7.52634	8.5e-05												4.64738	0.00346229
				7.53512	9.12e-05												4.65264	0.00343315
				7.54389	9.65e-05												4.6579	0.00340402
				7.55266	9.96e-05												4.66317	0.00330085
				7.56143	0.00010353												4.66843	0.00325928
				7.5702	0.000107742												4.67369	0.00321771
				7.57898	0.000110869												4.67896	0.00311632
				7.58775	0.000113391												4.68422	0.00264202
				7.59652	0.000115964												4.68948	0.00236553
				7.60529	0.000121368												4.69474	0.00236926
				7.61406	0.00012737												4.70001	0.00251254
				7.62284	0.000130837												4.70527	0.0028194
				7.63161	0.000134904												4.71053	0.00327547
				7.64038	0.00014033												4.7158	0.00331902
				7.64915	0.000144807												4.72106	0.00333149
				7.65792	0.000148536												4.72632	0.00328312
				7.6667	0.000154416												4.73159	0.00323476
				7.67547	0.000161383												4.73685	0.00320206
				7.68424	0.000168296												4.74211	0.00311055
				7.69301	0.000174379												4.74738	0.00301905
				7.70178	0.000179369												4.75264	0.00253641
				7.71055	0.000185129												4.7579	0.00217957
				7.71933	0.000189733												4.76317	0.00212911
				7.7281	0.000193656												4.76843	0.00225769
				7.73687	0.000199885												4.77369	0.00249059
				7.74564	0.000207913												4.77896	0.00297006
				7.75441	0.000215076												4.78422	0.00313022
				7.76319	0.000221134												4.78948	0.00310954
				7.77196	0.000227187												4.79475	0.00308885
				7.78073	0.00023373												4.80001	0.00303593
				7.7895	0.000240201												4.80527	0.00295321
				7.79827	0.000246568												4.81054	0.00293861
				7.80705	0.000253751												4.8158	0.00283589
				7.81582	0.00026269												4.82106	0.00249621
				7.82459	0.000272392												4.82632	0.00214083
				7.83336	0.000280669												4.83159	0.00199822
				7.84213	0.000288829												4.83685	0.00203805
				7.85091	0.00029832												4.84211	0.00219534
				7.85968	0.000307471												4.84738	0.0026267
				7.86845	0.000315983												4.85264	0.00285177
				7.87722	0.000326092												4.8579	0.00295516
				7.88599	0.000337921												4.86317	0.00294758
				7.89477	0.000349203												4.86843	0.00289039
				7.90354	0.000359171												4.87369	0.0028332
				7.91231	0.00036889												4.87896	0.00281646
				7.92108	0.000379374												4.88422	0.00266995
				7.92985	0.000390111												4.88948	0.00252345
				7.93863	0.000400928												4.89475	0.00207802
				7.9474	0.000413026												4.90001	0.00184808
				7.95617	0.000425664												4.90527	0.00190111
				7.96494	0.000437298												4.91054	0.00207695
				7.97371	0.000448279												4.9158	0.00239371
				7.98249	0.000460551												4.92106	0.00285389
				7.99126	0.000472106												4.92633	0.00296723
				8.00003	0.000481092												4.93159	0.0030061
				8.0088	0.000490424												4.93685	0.00296782
				8.01757	0.000500911												4.94212	0.00292954
				8.02635	0.000512826												4.94738	0.00288659
				8.03512	0.000524095												4.95264	0.00277111
				8.04389	0.000532898												4.95791	0.00265563
				8.05266	0.000541095												4.96317	0.00219635
				8.06143	0.000549023												4.96843	0.00187237
				8.07021	0.00055546												4.97369	0.00181234
				8.07898	0.000561156												4.97896	0.00194367
				8.08775	0.000568024												4.98422	0.0022236
				8.09652	0.000575374												4.98948	0.00274144
				8.10529	0.000581407												4.99475	0.00291539
				8.11407	0.000585546												5.00001	0.00296206
				8.12284	0.000589355												5.00527	0.00292743
				8.13161	0.000593589												5.01054	0.0028928
				8.14038	0.000596574												5.0158	0.00281997
				8.14915	0.000598063												5.02106	0.00277872
				8.15793	0.000600575												5.02633	0.00273747
				8.1667	0.000604832												5.03159	0.00232759
				8.17547	0.000605828												5.03685	0.00193206
				8.18424	0.000606823												5.04212	0.00178126
				8.19301	0.000607842												5.04738	0.00184703
				8.20179	0.000608035												5.05264	0.00209225
				8.21056	0.00060805												5.05791	0.00252616
				8.21933	0.000608065												5.06317	0.00274363
				8.2281	0.000608221												5.06843	0.00284093
				8.23687	0.000609428												5.0737	0.00283339
				8.24565	0.000609316												5.07896	0.00276931
				8.25442	0.000609142												5.08422	0.00270524
				8.26319	0.000608968												5.08949	0.00262628
				8.27196	0.000608716												5.09475	0.00254733
				8.28073	0.000608464												5.10001	0.00239192
				8.28951	0.000607217												5.10527	0.00192501
				8.29828	0.000608837												5.11054	0.00163168
				8.30705	0.000611863												5.1158	0.00162288
				8.31582	0.000612234												5.12106	0.00181584
				8.32459	0.000612605												5.12633	0.00220357
				8.33337	0.000613866												5.13159	0.00271087
				8.34214	0.000616243												5.13685	0.00271073
				8.35091	0.000617195												5.14212	0.00267482
				8.35968	0.000617083												5.14738	0.00263892
				8.36845	0.000618641												5.15264	0.00250309
				8.37723	0.000621791												5.15791	0.002458
				8.386	0.00062504												5.16317	0.0024295
				8.39477	0.000626827												5.16843	0.00240099
				8.40354	0.00062866												5.1737	0.00192852
				8.41231	0.000631536												5.17896	0.00163986
				8.42109	0.0006331												5.18422	0.00160675
				8.42986	0.000634765												5.18949	0.0017331
				8.43863	0.000638115												5.19475	0.00200828
				8.4474	0.000642274												5.20001	0.00247102
				8.45617	0.000646422												5.20528	0.00261842
				8.46495	0.000649584												5.21054	0.00261256
				8.47372	0.000651293												5.2158	0.00259168
				8.48249	0.000654314												5.22107	0.00257079
				8.49126	0.000657251												5.22633	0.0025328
				8.50003	0.000658841												5.23159	0.00250311
				8.50881	0.000661727												5.23685	0.00247342
				8.51758	0.000666108												5.24212	0.00208577
				8.52635	0.000669227												5.24738	0.00172288
				8.53512	0.00067141												5.25264	0.00162165
				8.54389	0.000675235												5.25791	0.00173162
				8.55267	0.000679064												5.26317	0.00198768
				8.56144	0.000682451												5.26843	0.00246533
				8.57021	0.000684199												5.2737	0.0026741
				8.57898	0.000686475												5.27896	0.00277044
				8.58775	0.000692442												5.28422	0.00279655
				8.59653	0.000698183												5.28949	0.00278956
				8.6053	0.000701042												5.29475	0.00278257
				8.61407	0.000704376												5.30001	0.00271471
				8.62284	0.00070935												5.30528	0.00264686
				8.63161	0.000713007												5.31054	0.00248306
				8.64039	0.000716014												5.3158	0.00200409
				8.64916	0.000720295												5.32107	0.00178774
				8.65793	0.000725127												5.32633	0.00187077
				8.6667	0.000729665												5.33159	0.00208705
				8.67547	0.000734274												5.33686	0.00246672
				8.68425	0.000738586												5.34212	0.0027093
				8.69302	0.000741841												5.34738	0.00281321
				8.70179	0.000744322												5.35265	0.00279118
				8.71056	0.000746727												5.35791	0.00276915
				8.71933	0.000750901												5.36317	0.00264509
				8.72811	0.000756102												5.36843	0.00260008
				8.73688	0.000759777												5.3737	0.00249724
				8.74565	0.000763301												5.37896	0.0023944
				8.75442	0.000768041												5.38422	0.00189566
				8.76319	0.000771998												5.38949	0.00162555
				8.77197	0.000775023												5.39475	0.00165764
				8.78074	0.000778085												5.40001	0.00181197
				8.78951	0.000782809												5.40528	0.00207139
				8.79828	0.000789899												5.41054	0.00254084
				8.80705	0.00079606												5.4158	0.00268713
				8.81583	0.000801032												5.42107	0.00268474
				8.8246	0.000806648												5.42633	0.00266948
				8.83337	0.000812943												5.43159	0.00265422
				8.84214	0.000818445												5.43686	0.00258618
				8.85091	0.00082414												5.44212	0.002496
				8.85969	0.000831825												5.44738	0.00240581
				8.86846	0.000840539												5.45265	0.0018847
				8.87723	0.000848566												5.45791	0.00150294
				8.886	0.000856246												5.46317	0.00134389
				8.89477	0.000864563												5.46844	0.00142589
				8.90355	0.000874013												5.4737	0.00170985
				8.91232	0.000883036												5.47896	0.00216931
				8.92109	0.000892375												5.48423	0.00234904
				8.92986	0.000904354												5.48949	0.00240646
				8.93863	0.000917737												5.49475	0.00237851
				8.94741	0.000931003												5.50001	0.00235056
				8.95618	0.000943765												5.50528	0.002235
				8.96495	0.000958123												5.51054	0.00220818
				8.97372	0.000973039												5.5158	0.00218136
				8.98249	0.000987311												5.52107	0.00182961
				8.99127	0.00100352												5.52633	0.00135779
				9.00004	0.00102167												5.53159	0.00115126
				9.00881	0.00104127												5.53686	0.00124746
				9.01758	0.00106088												5.54212	0.00147422
				9.02635	0.00107979												5.54738	0.00185121
				9.03513	0.00110018												5.55265	0.00232006
				9.0439	0.00112153												5.55791	0.00234263
				9.05267	0.00114184												5.56317	0.00234487
				9.06144	0.00116174												5.56844	0.00228946
				9.07021	0.00118432												5.5737	0.00223405
				9.07899	0.00120827												5.57896	0.00218522
				9.08776	0.00123138												5.58423	0.00213639
				9.09653	0.00125432												5.58949	0.00203925
				9.1053	0.00127812												5.59475	0.00153862
				9.11407	0.0013021												5.60002	0.0012145
				9.12285	0.00132573												5.60528	0.00117379
				9.13162	0.00135059												5.61054	0.00133362
				9.14039	0.00137726												5.61581	0.00163302
				9.14916	0.00140541												5.62107	0.00216502
				9.15793	0.00143309												5.62633	0.00234013
				9.16671	0.00146033												5.63159	0.00229763
				9.17548	0.00148901												5.63686	0.00225512
				9.18425	0.00151843												5.64212	0.00217369
				9.19302	0.0015481												5.64738	0.00212102
				9.20179	0.00157988												5.65265	0.00208536
				9.21057	0.00161421												5.65791	0.0020497
				9.21934	0.00164992												5.66317	0.00154558
				9.22811	0.00168644												5.66844	0.00110959
				9.23688	0.00172372												5.6737	0.000984066
				9.24565	0.00176336												5.67896	0.00104749
				9.25443	0.00180414												5.68423	0.00124884
				9.2632	0.00184548												5.68949	0.00170044
				9.27197	0.00189011												5.69475	0.00187711
				9.28074	0.00193828												5.70002	0.00193234
				9.28951	0.00198892												5.70528	0.0019231
				9.29829	0.00204157												5.71054	0.00188778
				9.30706	0.00209633												5.71581	0.00185246
				9.31583	0.00215402												5.72107	0.00175261
				9.3246	0.00221456												5.72633	0.00165276
				9.33337	0.00227794												5.7316	0.0014667
				9.34215	0.0023461												5.73686	0.00100093
				9.35092	0.00241845												5.74212	0.000835645
				9.35969	0.00249402												5.74739	0.000943279
				9.36846	0.00257181												5.75265	0.0011609
				9.37723	0.00265188												5.75791	0.00156646
				9.38601	0.00273768												5.76317	0.00203535
				9.39478	0.00282624												5.76844	0.00204078
				9.40355	0.00291625												5.7737	0.00202553
				9.41232	0.00301191												5.77896	0.00201028
				9.42109	0.0031118												5.78423	0.00191519
				9.42987	0.00321348												5.78949	0.00189623
				9.43864	0.00331642												5.79475	0.00187728
				9.44741	0.00342257												5.80002	0.00161837
				9.45618	0.00353322												5.80528	0.0011905
				9.46495	0.00364477												5.81054	0.000923196
				9.47373	0.00375729												5.81581	0.000926271
				9.4825	0.0038741												5.82107	0.00105889
				9.49127	0.00399467												5.82633	0.00137113
				9.50004	0.00411447												5.8316	0.00191126
				9.50881	0.00423342												5.83686	0.00203481
				9.51759	0.00435344												5.84212	0.00201867
				9.52636	0.00447451												5.84739	0.00200252
				9.53513	0.00459531												5.85265	0.001974
				9.5439	0.00471398												5.85791	0.00194767
				9.55267	0.00483321												5.86318	0.00187435
				9.56145	0.00495316												5.86844	0.00180104
				9.57022	0.00505529												5.8737	0.00134836
				9.57899	0.00513042												5.87897	0.000982571
				9.58776	0.00521762												5.88423	0.000887574
				9.59653	0.00532652												5.88949	0.000974071
				9.60531	0.00543202												5.89475	0.00118423
				9.61408	0.00553254												5.90002	0.00166836
				9.62285	0.00563209												5.90528	0.00181848
				9.63162	0.00572982												5.91054	0.00180727
				9.64039	0.00582169												5.91581	0.00178053
				9.64917	0.00590776												5.92107	0.00175379
				9.65794	0.00598955												5.92633	0.00163179
				9.66671	0.00606855												5.9316	0.0016066
				9.67548	0.00614273												5.93686	0.00151292
				9.68425	0.00621082												5.94212	0.00107913
				9.69303	0.00627625												5.94739	0.000585307
				9.7018	0.00633974												5.95265	0.000384671
				9.71057	0.00639749												5.95791	0.000441744
				9.71934	0.00644938												5.96318	0.000647597
				9.72811	0.00649783												5.96844	0.00107434
				9.73689	0.00654385												5.9737	0.00152523
				9.74566	0.00658529												5.97897	0.00148995
				9.75443	0.00662193												5.98423	0.00145466
				9.7632	0.00665719												5.98949	0.00138906
				9.77197	0.00669099												5.99476	0.0012495
				9.78075	0.00672111												6.00002	0.00120477
				9.78952	0.00674766												6.00528	0.00108381
				9.79829	0.00677231												6.01055	0.000962853
				9.80706	0.00679565												6.01581	0.000449301
				9.81583	0.00681676												6.02107	0.000128866
				9.82461	0.00683592												6.02633	0.00015325
				9.83338	0.00685602												6.0316	0.000324383
				9.84215	0.00687709												6.03686	0.000601172
				9.85092	0.00689824												6.04212	0.00107549
				9.85969	0.00691876												6.04739	0.00121178
				9.86847	0.00693952												6.05265	0.00116626
				9.87724	0.00696234												6.05791	0.00112074
				9.88601	0.00698627												6.06318	0.00103949
				9.89478	0.00701137												6.06844	0.000998512
				9.90355	0.00703913												6.0737	0.000941927
				9.91233	0.00706962												6.07897	0.000885341
				9.9211	0.00710348												6.08423	0.000408399
				9.92987	0.00713834												6.08949	9.58764e-06
				9.93864	0.00717446												6.09476	-0.000120765
				9.94741	0.00721531												6.10002	-4.47588e-05
				9.95619	0.00725861												6.10528	0.000254991
				9.96496	0.00730328												6.11055	0.000803271
				9.97373	0.00735238												6.11581	0.000983537
				9.9825	0.0074068												6.12107	0.00104164
				9.99127	0.00746366												6.12634	0.000999548
				10	0.00752197												6.1316	0.00095746
				10.0088	0.00758304												6.13686	0.000855214
				10.0176	0.00764862												6.14213	0.000829095
				10.0264	0.00771692												6.14739	0.000802977
				10.0351	0.00778578												6.15265	0.000386153
				10.0439	0.00785789												6.15791	-5.73345e-05
				10.0527	0.00793502												6.16318	-0.000167089
				10.0615	0.00801444												6.16844	-6.5148e-05
				10.0702	0.00809397												6.1737	9.57066e-05
				10.079	0.00817576												6.17897	0.000471495
				10.0878	0.00826059												6.18423	0.000645959
				10.0965	0.00834665												6.18949	0.000720109
				10.1053	0.00843428												6.19476	0.000677054
				10.1141	0.00852435												6.20002	0.000633998
				10.1229	0.00861786												6.20528	0.000459694
				10.1316	0.00871291												6.21055	0.000407289
				10.1404	0.00880721												6.21581	0.000253422
				10.1492	0.00890298												6.22107	9.95554e-05
				10.1579	0.00900229												6.22634	-0.000456422
				10.1667	0.00910267												6.2316	-0.000790797
				10.1755	0.00920458												6.23686	-0.000779908
				10.1843	0.00931164												6.24213	-0.000644981
				10.193	0.00942227												6.24739	-0.000344802
				10.2018	0.00953426												6.25265	0.00022559
				10.2106	0.00964937												6.25792	0.000276025
				10.2193	0.00977029												6.26318	0.000294017
				10.2281	0.00989758												6.26844	0.000267969
				10.2369	0.0100286												6.27371	0.000241921
				10.2457	0.0101664												6.27897	0.000236824
				10.2544	0.0103157												6.28423	0.000216064
				10.2632	0.0104755												6.28949	0.000195305
				10.272	0.0106431												6.29476	-0.000269669
				10.2807	0.0108193												6.30002	-0.000601929
				10.2895	0.0110101												6.30528	-0.000619007
				10.2983	0.0112182												6.31055	-0.000470712
				10.3071	0.0114404												6.31581	-0.000179101
				10.3158	0.0116803												6.32107	0.00038234
				10.3246	0.0119447												6.32634	0.000577514
				10.3334	0.0122329												6.3316	0.000648606
				10.3422	0.0125411												6.33686	0.000639236
				10.3509	0.0128708												6.34213	0.000595698
				10.3597	0.0132315												6.34739	0.00055216
				10.3685	0.0136274												6.35265	0.000512474
				10.3772	0.0140511												6.35792	0.000472788
				10.386	0.0145109												6.36318	9.42693e-05
				10.3948	0.0150185												6.36844	-0.000324058
				10.4036	0.0155672												6.37371	-0.000500823
				10.4123	0.0161626												6.37897	-0.000414484
				10.4211	0.016812												6.38423	-0.000176643
				10.4299	0.0175092												6.3895	0.000218246
				10.4386	0.01826												6.39476	0.00059011
				10.4474	0.0190517												6.40002	0.000577289
				10.4562	0.0199003												6.40529	0.000554377
				10.465	0.0208284												6.41055	0.000531465
				10.4737	0.0218058												6.41581	0.000410188
				10.4825	0.0228213												6.42107	0.000316962
				10.4913	0.0238908												6.42634	0.000223737
				10.5	0.0250395												6.4316	3.74967e-05
				10.5088	0.0262633												6.43686	-0.000457258
				10.5176	0.0275691												6.44213	-0.000714483
				10.5264	0.0289783												6.44739	-0.000669355
				10.5351	0.0304551												6.45265	-0.000444972
				10.5439	0.0319877												6.45792	-9.66763e-05
				10.5527	0.0335611												6.46318	0.000415723
				10.5615	0.0351722												6.46844	0.000449724
				10.5702	0.0368706												6.47371	0.00045032
				10.579	0.0386671												6.47897	0.000395177
				10.5878	0.0405079												6.48423	0.000340034
				10.5965	0.0423996												6.4895	0.000314351
				10.6053	0.0443938												6.49476	0.000195469
				10.6141	0.0464471												6.50002	7.65867e-05
				10.6229	0.0485109												6.50529	-0.000422129
				10.6316	0.0506167												6.51055	-0.000800994
				10.6404	0.0527975												6.51581	-0.000869727
				10.6492	0.0550296												6.52108	-0.000726292
				10.6579	0.0572803												6.52634	-0.000493123
				10.6667	0.0595686												6.5316	-5.15288e-05
				10.6755	0.0619261												6.53687	-1.92977e-05
				10.6843	0.0642924												6.54213	-2.21135e-05
				10.693	0.0666083												6.54739	-6.8514e-05
				10.7018	0.0689267												6.55265	-0.000114914
				10.7106	0.0712952												6.55792	-0.000210174
				10.7193	0.0736969												6.56318	-0.000248615
				10.7281	0.0760783												6.56844	-0.000403898
				10.7369	0.0784791												6.57371	-0.000869425
				10.7457	0.0809147												6.57897	-0.00131719
				10.7544	0.0832878												6.58423	-0.00149102
				10.7632	0.085552												6.5895	-0.00144504
				10.772	0.0878017												6.59476	-0.00117899
				10.7808	0.0900552												6.60002	-0.000645034
				10.7895	0.0922442												6.60529	-0.000157215
				10.7983	0.0943376												6.61055	-0.000206599
				10.8071	0.0963529												6.61581	-0.000255983
				10.8158	0.0983476												6.62108	-0.000347697
				10.8246	0.100278												6.62634	-0.000411438
				10.8334	0.102068												6.6316	-0.000445023
				10.8422	0.103737												6.63687	-0.000478608
				10.8509	0.105357												6.64213	-0.000630545
				10.8597	0.106913												6.64739	-0.00108607
				10.8685	0.108338												6.65266	-0.00125365
				10.8772	0.109667												6.65792	-0.00111805
				10.886	0.110945												6.66318	-0.000914272
				10.8948	0.112119												6.66845	-0.000550905
				10.9036	0.11315												6.67371	-4.74308e-05
				10.9123	0.114058												6.67897	1.81103e-05
				10.9211	0.114885												6.68423	-3.18313e-06
				10.9299	0.115624												6.6895	-2.44765e-05
				10.9386	0.116242												6.69476	-6.13865e-05
				10.9474	0.11675												6.70002	-0.000101375
				10.9562	0.117177												6.70529	-0.000141364
				10.965	0.117503												6.71055	-0.00020893
				10.9737	0.117711												6.71581	-0.000684752
				10.9825	0.117746												6.72108	-0.000980525
				10.9913	0.117749												6.72634	-0.0010265
				11.0001	0.117662												6.7316	-0.000895993
				11.0088	0.117576												6.73687	-0.000571137
				11.0176	0.117304												6.74213	-6.97619e-05
				11.0264	0.116948												6.74739	7.27678e-05
				11.0351	0.116513												6.75266	0.000115929
				11.0439	0.115999												6.75792	9.30953e-05
				11.0527	0.115402												6.76318	7.02612e-05
				11.0615	0.114728												6.76845	2.59728e-06
				11.0702	0.11398												6.77371	-5.42437e-05
				11.079	0.113165												6.77897	-0.000111085
				11.0878	0.112277												6.78424	-0.000600419
				11.0965	0.111308												6.7895	-0.00103738
				11.1053	0.110276												6.79476	-0.00116654
				11.1141	0.10921												6.80003	-0.00106632
				11.1229	0.108098												6.80529	-0.000794677
				11.1316	0.106922												6.81055	-0.00029612
				11.1404	0.105691												6.81581	-9.49004e-05
				11.1492	0.104426												6.82108	-1.40751e-05
				11.1579	0.103108												6.82634	-1.90863e-05
				11.1667	0.101732												6.8316	-6.96655e-05
				11.1755	0.100325												6.83687	-0.000120245
				11.1843	0.0988944												6.84213	-0.000153773
				11.193	0.0974466												6.84739	-0.0001923
				11.2018	0.0959672												6.85266	-0.000508256
				11.2106	0.0944477												6.85792	-0.000946187
				11.2194	0.0929125												6.86318	-0.00117035
				11.2281	0.0913511												6.86845	-0.00114315
				11.2369	0.0897467												6.87371	-0.000957362
				11.2457	0.0880899												6.87897	-0.0006045
				11.2544	0.0864694												6.88424	-0.000166555
				11.2632	0.0849001												6.8895	-0.000154928
				11.272	0.0832996												6.89476	-0.000160394
				11.2808	0.0816803												6.90003	-0.000213275
				11.2895	0.0800684												6.90529	-0.000266156
				11.2983	0.0784323												6.91055	-0.000345813
				11.3071	0.076759												6.91582	-0.00038533
				11.3158	0.0751198												6.92108	-0.000652503
				11.3246	0.0735467												6.92634	-0.0011506
				11.3334	0.0720003												6.93161	-0.00147491
				11.3422	0.0704342												6.93687	-0.00150934
				11.3509	0.0688647												6.94213	-0.00135257
				11.3597	0.0673318												6.94739	-0.00103696
				11.3685	0.0658347												6.95266	-0.000486525
				11.3772	0.0643306												6.95792	-0.000348161
				11.386	0.0628245												6.96318	-0.00034532
				11.3948	0.061362												6.96845	-0.000355941
				11.4036	0.0599269												6.97371	-0.000376644
				11.4123	0.0584827												6.97897	-0.000397346
				11.4211	0.0570504												6.98424	-0.000439876
				11.4299	0.0556585												6.9895	-0.000482406
				11.4387	0.0542802												6.99476	-0.000905053
				11.4474	0.0528967												7.00003	-0.00125704
				11.4562	0.0515377												7.00529	-0.00132851
				11.465	0.0502269												7.01055	-0.00120974
				11.4737	0.0489545												7.01582	-0.000981015
				11.4825	0.0476872												7.02108	-0.00050169
				11.4913	0.0464336												7.02634	-0.000314097
				11.5001	0.0452262												7.03161	-0.000263946
				11.5088	0.0440374												7.03687	-0.000290417
				11.5176	0.0428443												7.04213	-0.000316887
				11.5264	0.0416813												7.0474	-0.000368768
				11.5351	0.0405728												7.05266	-0.000436846
				11.5439	0.0394936												7.05792	-0.000504924
				11.5527	0.0384093												7.06319	-0.000673762
				11.5615	0.0373445												7.06845	-0.0011431
				11.5702	0.0363302												7.07371	-0.00139309
				11.579	0.0353342												7.07897	-0.0013296
				11.5878	0.0343419												7.08424	-0.00111864
				11.5965	0.0333775												7.0895	-0.000734973
				11.6053	0.0324541												7.09476	-0.000234535
				11.6141	0.031551												7.10003	-0.000277935
				11.6229	0.0306581												7.10529	-0.000321336
				11.6316	0.0297921												7.11055	-0.000423075
				11.6404	0.0289542												7.11582	-0.000612355
				11.6492	0.0280868												7.12108	-0.000630501
				11.658	0.0272278												7.12634	-0.00080802
				11.6667	0.0264418												7.13161	-0.000985539
				11.6755	0.0256996												7.13687	-0.00151363
				11.6843	0.0249815												7.14213	-0.00182219
				11.693	0.0242686												7.1474	-0.00184256
				11.7018	0.0235699												7.15266	-0.00170343
				11.7106	0.0229015												7.15792	-0.00143
				11.7194	0.0222486												7.16319	-0.000915281
				11.7281	0.0215985												7.16845	-0.000891287
				11.7369	0.0209712												7.17371	-0.000896156
				11.7457	0.0203661												7.17898	-0.000938743
				11.7544	0.0197776												7.18424	-0.00098133
				11.7632	0.0192059												7.1895	-0.00103021
				11.772	0.0186456												7.19477	-0.0010816
				11.7808	0.0181015												7.20003	-0.00113299
				11.7895	0.017575												7.20529	-0.0015974
				11.7983	0.0170442												7.21055	-0.00199863
				11.8071	0.0165267												7.21582	-0.00211564
				11.8158	0.0160437												7.22108	-0.0020188
				11.8246	0.0155844												7.22634	-0.00175529
				11.8334	0.0151371												7.23161	-0.00124813
				11.8422	0.0146998												7.23687	-0.00105547
				11.8509	0.0142838												7.24213	-0.000982017
				11.8597	0.0138785												7.2474	-0.000993017
				11.8685	0.0134753												7.25266	-0.00104539
				11.8773	0.0130877												7.25792	-0.00109777
				11.886	0.0127236												7.26319	-0.00111374
				11.8948	0.0123736												7.26845	-0.001202
				11.9036	0.0120259												7.27371	-0.00159627
				11.9123	0.0116868												7.27898	-0.00207701
				11.9211	0.0113647												7.28424	-0.00224471
				11.9299	0.0110507												7.2895	-0.00211875
				11.9387	0.0107397												7.29477	-0.00189413
				11.9474	0.0104412												7.30003	-0.00150079
				11.9562	0.0101613												7.30529	-0.00102628
				11.965	0.0098912												7.31056	-0.00104122
				11.9737	0.00962356												7.31582	-0.00105615
				11.9825	0.00936419												7.32108	-0.00110824
				11.9913	0.00911762												7.32635	-0.00118311
				12.0001	0.00887718												7.33161	-0.00125003
				12.0088	0.00863779												7.33687	-0.00131695
				12.0176	0.00840899												7.34213	-0.00147335
				12.0264	0.00819702												7.3474	-0.00199819
				12.0351	0.00799106												7.35266	-0.00225742
				12.0439	0.00778733												7.35792	-0.00222954
				12.0527	0.00759139												7.36319	-0.00208234
				12.0615	0.00740457												7.36845	-0.00180189
				12.0702	0.00722137												7.37371	-0.00134629
				12.079	0.00704113												7.37898	-0.00131451
				12.0878	0.00687051												7.38424	-0.0013112
				12.0966	0.0067105												7.3895	-0.0013527
				12.1053	0.00655621												7.39477	-0.0013942
				12.1141	0.00640405												7.40003	-0.00146
				12.1229	0.0062568												7.40529	-0.00152833
				12.1316	0.00611761												7.41056	-0.00159667
				12.1404	0.00598075												7.41582	-0.00206332
				12.1492	0.00584438												7.42108	-0.00242435
				12.158	0.00571674												7.42635	-0.00253228
				12.1667	0.00559772												7.43161	-0.00241161
				12.1755	0.00548153												7.43687	-0.00206225
				12.1843	0.00536754												7.44214	-0.00151505
				12.193	0.00525699												7.4474	-0.00132753
				12.2018	0.00515157												7.45266	-0.00125341
				12.2106	0.0050641												7.45793	-0.00125827
				12.2194	0.00500008												7.46319	-0.00129173
				12.2281	0.00492686												7.46845	-0.00132518
				12.2369	0.00483775												7.47371	-0.00135509
				12.2457	0.00475094												7.47898	-0.00138499
				12.2544	0.00466395												7.48424	-0.00178107
				12.2632	0.00458109												7.4895	-0.00226248
				12.272	0.00450252												7.49477	-0.00242653
				12.2808	0.004425												7.50003	-0.00231703
				12.2895	0.0043478												7.50529	-0.00209261
				12.2983	0.00427444												7.51056	-0.00170125
				12.3071	0.00420767												7.51582	-0.00130662
				12.3159	0.00414202												7.52108	-0.00134738
				12.3246	0.00407492												7.52635	-0.00138814
				12.3334	0.00401044												7.53161	-0.00145807
				12.3422	0.00394918												7.53687	-0.00157458
				12.3509	0.00388805												7.54214	-0.00166086
				12.3597	0.00382694												7.5474	-0.00174715
				12.3685	0.00376957												7.55266	-0.00191635
				12.3773	0.00371619												7.55793	-0.00244471
				12.386	0.00366302												7.56319	-0.00276085
				12.3948	0.00361004												7.56845	-0.00276604
				12.4036	0.00355832												7.57372	-0.0025929
				12.4123	0.00350769												7.57898	-0.00223521
				12.4211	0.00345693												7.58424	-0.00172908
				12.4299	0.00340716												7.58951	-0.00171878
				12.4387	0.00335964												7.59477	-0.00174283
				12.4474	0.00331405												7.60003	-0.00176688
				12.4562	0.00326871												7.60529	-0.00193551
				12.465	0.00322259												7.61056	-0.00197493
				12.4737	0.00317884												7.61582	-0.00204112
				12.4825	0.0031364												7.62108	-0.0021073
				12.4913	0.00309197												7.62635	-0.00255827
				12.5001	0.00304802												7.63161	-0.00294408
				12.5088	0.00300649												7.63687	-0.0030324
				12.5176	0.00296698												7.64214	-0.00289193
				12.5264	0.00292784												7.6474	-0.00261879
				12.5352	0.00288687												7.65266	-0.00213156
				12.5439	0.00284615												7.65793	-0.00195673
				12.5527	0.00280609												7.66319	-0.00194652
				12.5615	0.00276458												7.66845	-0.00195169
				12.5702	0.00272321												7.67372	-0.00199101
				12.579	0.00268378												7.67898	-0.00203033
				12.5878	0.00264652												7.68424	-0.00205108
				12.5966	0.00260923												7.68951	-0.00207184
				12.6053	0.00257093												7.69477	-0.0024733
				12.6141	0.00253369												7.70003	-0.00292288
				12.6229	0.00249685												7.7053	-0.00306664
				12.6316	0.0024595												7.71056	-0.00294691
				12.6404	0.00242176												7.71582	-0.00273319
				12.6492	0.00238636												7.72109	-0.00228481
				12.658	0.00235208												7.72635	-0.00177151
				12.6667	0.00231678												7.73161	-0.00181331
				12.6755	0.00228181												7.73687	-0.00185512
				12.6843	0.0022481												7.74214	-0.00193826
				12.693	0.00221344												7.7474	-0.00203091
				12.7018	0.00217742												7.75266	-0.00207683
				12.7106	0.00214258												7.75793	-0.00212275
				12.7194	0.00211006												7.76319	-0.00227728
				12.7281	0.00207858												7.76845	-0.0027871
				12.7369	0.00204509												7.77372	-0.00305716
				12.7457	0.00201158												7.77898	-0.00300467
				12.7545	0.00197994												7.78424	-0.00281807
				12.7632	0.0019488												7.78951	-0.00246585
				12.772	0.00191644												7.79477	-0.00195467
				12.7808	0.00188392												7.80003	-0.00195495
				12.7895	0.00185368												7.8053	-0.00198708
				12.7983	0.00182481												7.81056	-0.00201922
				12.8071	0.00179472												7.81582	-0.00210525
				12.8159	0.00176418												7.82109	-0.00216019
				12.8246	0.00173541												7.82635	-0.00220112
				12.8334	0.00170702												7.83161	-0.00243711
				12.8422	0.00167663												7.83688	-0.00289452
				12.8509	0.00164655												7.84214	-0.00318187
				12.8597	0.00162008												7.8474	-0.00317319
				12.8685	0.00159416												7.85267	-0.00302754
				12.8773	0.00156654												7.85793	-0.0027617
				12.886	0.00153914												7.86319	-0.00227527
				12.8948	0.00151233												7.86845	-0.00192359
				12.9036	0.00148602												7.87372	-0.00194255
				12.9123	0.00145867												7.87898	-0.0019615
				12.9211	0.00143149												7.88424	-0.0019894
				12.9299	0.00140745												7.88951	-0.00210171
				12.9387	0.00138574												7.89477	-0.00213633
				12.9474	0.0013622												7.90003	-0.00217094
				12.9562	0.0013365												7.9053	-0.00259917
				12.965	0.00131279												7.91056	-0.00305022
				12.9738	0.00128983												7.91582	-0.0032227
				12.9825	0.00126566												7.92109	-0.00308308
				12.9913	0.00124158												7.92635	-0.00280695
				13.0001	0.00121965												7.93161	-0.00234921
				13.0088	0.00119899												7.93688	-0.00212919
				13.0176	0.00117777												7.94214	-0.00203038
				13.0264	0.00115569												7.9474	-0.00204054
				13.0352	0.00113512												7.95267	-0.00210384
				13.0439	0.00111464												7.95793	-0.00216713
				13.0527	0.00109285												7.96319	-0.00225693
				13.0615	0.0010717												7.96846	-0.00234672
				13.0702	0.00105191												7.97372	-0.00253783
				13.079	0.00103457												7.97898	-0.00306048
				13.0878	0.00101649												7.98425	-0.00331706
				13.0966	0.000997045												7.98951	-0.00330126
				13.1053	0.000979074												7.99477	-0.00315887
				13.1141	0.000961227												8.00003	-0.00281055
				13.1229	0.000941998												8.0053	-0.00232333
				13.1316	0.000922221												8.01056	-0.00231228
				13.1404	0.000905967												8.01582	-0.00232408
				13.1492	0.000891649												8.02109	-0.0023645
				13.158	0.000875291												8.02635	-0.00240492
				13.1667	0.000857705												8.03161	-0.00245077
				13.1755	0.000841293												8.03688	-0.00249661
				13.1843	0.000826108												8.04214	-0.00259001
				13.1931	0.000809303												8.0474	-0.0030091
				13.2018	0.000793077												8.05267	-0.0033144
				13.2106	0.000779067												8.05793	-0.0033667
				13.2194	0.000765617												8.06319	-0.00319483
				13.2281	0.000751856												8.06846	-0.0028576
				13.2369	0.000738639												8.07372	-0.00227743
				13.2457	0.00072539												8.07898	-0.00206874
				13.2545	0.000711242												8.08425	-0.00198473
				13.2632	0.000696779												8.08951	-0.00198373
				13.272	0.000682652												8.09477	-0.00200206
				13.2808	0.000671057												8.10004	-0.0020204
				13.2895	0.000660142												8.1053	-0.00212883
				13.2983	0.000647701												8.11056	-0.00223725
				13.3071	0.000634806												8.11583	-0.00244384
				13.3159	0.000622978												8.12109	-0.002851
				13.3246	0.000610656												8.12635	-0.00296529
				13.3334	0.000597166												8.13161	-0.0027986
				13.3422	0.000585296												8.13688	-0.00253937
				13.3509	0.000575944												8.14214	-0.00206439
				13.3597	0.000566818												8.1474	-0.00161491
				13.3685	0.000555881												8.15267	-0.00164993
				13.3773	0.000545139												8.15793	-0.00168494
				13.386	0.000535542												8.16319	-0.00174368
				13.3948	0.000526513												8.16846	-0.00180132
				13.4036	0.000516229												8.17372	-0.00186205
				13.4124	0.000505293												8.17898	-0.00192279
				13.4211	0.000496502												8.18425	-0.00208672
				13.4299	0.000489134												8.18951	-0.00256613
				13.4387	0.000480991												8.19477	-0.00275854
				13.4474	0.000471796												8.20004	-0.00266381
				13.4562	0.000464289												8.2053	-0.00248655
				13.465	0.000456662												8.21056	-0.00209613
				13.4738	0.000447856												8.21583	-0.00157322
				13.4825	0.00043968												8.22109	-0.00154973
				13.4913	0.000432164												8.22635	-0.00155247
				13.5001	0.000426469												8.23162	-0.00158499
				13.5088	0.00041986												8.23688	-0.00161752
				13.5176	0.000412344												8.24214	-0.00168929
				13.5264	0.000405766												8.24741	-0.00176106
				13.5352	0.00039863												8.25267	-0.00189027
				13.5439	0.000389614												8.25793	-0.002328
				13.5527	0.000381212												8.26319	-0.00257305
				13.5615	0.000375453												8.26846	-0.00255494
				13.5702	0.000370265												8.27372	-0.00239722
				13.579	0.000364073												8.27898	-0.00205674
				13.5878	0.000356699												8.28425	-0.00145937
				13.5966	0.000350687												8.28951	-0.00128813
				13.6053	0.000345393												8.29477	-0.00128906
				13.6141	0.000337393												8.30004	-0.00130273
				13.6229	0.000329268												8.3053	-0.00132626
				13.6317	0.000323662												8.31056	-0.00134979
				13.6404	0.000318635												8.31583	-0.00146409
				13.6492	0.000312095												8.32109	-0.0015784
				13.658	0.000304884												8.32635	-0.00179409
				13.6667	0.00029876												8.33162	-0.00216276
				13.6755	0.000291914												8.33688	-0.00223998
				13.6843	0.000285021												8.34214	-0.0021092
				13.6931	0.000278613												8.34741	-0.0018439
				13.7018	0.000273768												8.35267	-0.0013545
				13.7106	0.000270818												8.35793	-0.000894297
				13.7194	0.0002653												8.3632	-0.000901571
				13.7281	0.000259974												8.36846	-0.000913971
				13.7369	0.000255893												8.37372	-0.000945252
				13.7457	0.000250462												8.37899	-0.000976532
				13.7545	0.000243683												8.38425	-0.00106859
				13.7632	0.000237994												8.38951	-0.00116065
				13.772	0.000233677												8.39477	-0.00133408
				13.7808	0.000228716												8.40004	-0.00173246
				13.7895	0.000223652												8.4053	-0.00187113
				13.7983	0.000218104												8.41056	-0.00170991
				13.8071	0.00021362												8.41583	-0.00143252
				13.8159	0.000210097												8.42109	-0.000991504
				13.8246	0.000204447												8.42635	-0.000395919
				13.8334	0.000198714												8.43162	-0.000279493
				13.8422	0.000195549												8.43688	-0.000232999
				13.851	0.000192041												8.44214	-0.000186505
				13.8597	0.000187102												8.44741	-0.000188975
				13.8685	0.000183003												8.45267	-7.30348e-05
				13.8773	0.000179358												8.45793	-0.000136955
				13.886	0.000174734												8.4632	-0.000200875
				13.8948	0.000170115												8.46846	-0.000363746
				13.9036	0.000165877												8.47372	-0.000461669
				13.9124	0.000162												8.47899	-0.000293737
				13.9211	0.000159008												8.48425	5.10739e-06
				13.9299	0.000155588												8.48951	0.000504076
				13.9387	0.000150065												8.49478	0.00120905
				13.9474	0.000144769												8.50004	0.00168872
				13.9562	0.000140432												8.5053	0.00180503
				13.965	0.000135121												8.51057	0.00189759
				13.9738	0.000129663												8.51583	0.00201071
				13.9825	0.000126635												8.52109	0.00216273
				13.9913	0.00012354												8.52635	0.00244247
				14.0001	0.000118415												8.53162	0.00240614
				14.0088	0.000114087												8.53688	0.0023698
				14.0176	0.000110625												8.54214	0.00229681
				14.0264	0.000106201												8.54741	0.00238477
				14.0352	0.00010105												8.55267	0.00273918
				14.0439	9.68e-05												8.55793	0.00326708
				14.0527	9.34e-05												8.5632	0.00400149
				14.0615	9.11e-05												8.56846	0.0047134
				14.0703	8.78e-05												8.57372	0.00505727
				14.079	8.29e-05												8.57899	0.00518475
				14.0878	7.91e-05												8.58425	0.00532048
				14.0966	7.58e-05												8.58951	0.00553595
				14.1053	7.05e-05												8.59478	0.00591527
				14.1141	6.57e-05												8.60004	0.00602679
				14.1229	6.31e-05												8.6053	0.00603531
				14.1317	6.15e-05												8.61057	0.00604384
				14.1404	5.83e-05												8.61583	0.00629377
				14.1492	5.33e-05												8.62109	0.0067742
				14.158	4.98e-05												8.62636	0.0073629
				14.1667	4.62e-05												8.63162	0.00811575
				14.1755	4.14e-05												8.63688	0.00898699
				14.1843	3.68e-05												8.64215	0.00953728
				14.1931	3.5e-05												8.64741	0.009822
				14.2018	3.34e-05												8.65267	0.010135
				14.2106	2.95e-05												8.65793	0.0104984
				14.2194	2.64e-05												8.6632	0.0109595
				14.2281	2.42e-05												8.66846	0.0114172
				14.2369	1.95e-05												8.67372	0.0115884
				14.2457	1.5e-05												8.67899	0.0115835
				14.2545	1.13e-05												8.68425	0.0117947
				14.2632	8.18e-06												8.68951	0.0123132
				14.272	7.15e-06												8.69478	0.0129706
				14.2808	3.66e-06												8.70004	0.0138274
				14.2896	-7.05e-07												8.7053	0.0149234
				14.2983	-3.06e-06												8.71057	0.0157805
				14.3071	-7.08e-06												8.71583	0.016297
				14.3159	-1.23e-05												8.72109	0.0168033
				14.3246	-1.6e-05												8.72636	0.0173687
				14.3334	-1.87e-05												8.73162	0.0179881
				14.3422	-2.09e-05												8.73688	0.0187066
				14.351	-2.45e-05												8.74215	0.0192834
				14.3597	-2.81e-05												8.74741	0.0196355
				14.3685	-3.09e-05												8.75267	0.0200457
				14.3773	-3.44e-05												8.75794	0.0207336
				14.386	-3.88e-05												8.7632	0.0216976
				14.3948	-4.3e-05												8.76846	0.0227839
				14.4036	-4.45e-05												8.77373	0.0240571
				14.4124	-4.69e-05												8.77899	0.0252394
				14.4211	-5.1e-05												8.78425	0.0261091
				14.4299	-5.35e-05												8.78951	0.0269434
				14.4387	-5.57e-05												8.79478	0.0278217
				14.4474	-5.84e-05												8.80004	0.0287623
				14.4562	-6.23e-05												8.8053	0.0298334
				14.465	-6.59e-05												8.81057	0.0309156
				14.4738	-6.7e-05												8.81583	0.0317535
				14.4825	-6.76e-05												8.82109	0.0325583
				14.4913	-7.07e-05												8.82636	0.0336742
				14.5001	-7.29e-05												8.83162	0.035067
				14.5089	-7.33e-05												8.83688	0.0366098
				14.5176	-7.55e-05												8.84215	0.0383484
				14.5264	-7.85e-05												8.84741	0.0401548
				14.5352	-8.08e-05												8.85267	0.0417765
				14.5439	-8.23e-05												8.85794	0.0432588
				14.5527	-8.33e-05												8.8632	0.0447604
				14.5615	-8.56e-05												8.86846	0.046337
				14.5703	-8.79e-05												8.87373	0.048058
				14.579	-8.93e-05												8.87899	0.0499447
				14.5878	-9.21e-05												8.88425	0.0516671
				14.5966	-9.51e-05												8.88952	0.0532587
				14.6053	-9.71e-05												8.89478	0.0550584
				14.6141	-9.75e-05												8.90004	0.0571646
				14.6229	-9.79e-05												8.90531	0.0594444
				14.6317	-9.84e-05												8.91057	0.0619133
				14.6404	-0.00010019												8.91583	0.0645518
				14.6492	-0.000101427												8.92109	0.0670251
				14.658	-0.000103208												8.92636	0.0693116
				14.6667	-0.000104286												8.93162	0.0716409
				14.6755	-0.000106075												8.93688	0.0740374
				14.6843	-0.000106735												8.94215	0.0765317
				14.6931	-0.000107271												8.94741	0.0792188
				14.7018	-0.000107807												8.95267	0.0818361
				14.7106	-0.000109581												8.95794	0.0842546
				14.7194	-0.000110138												8.9632	0.0867506
				14.7282	-0.000110694												8.96846	0.0894432
				14.7369	-0.000113026												8.97373	0.0923285
				14.7457	-0.000113886												8.97899	0.095393
				14.7545	-0.000113741												8.98425	0.0986064
				14.7632	-0.000113826												8.98952	0.101712
				14.772	-0.00011408												8.99478	0.104589
				14.7808	-0.000114334												9.00004	0.10747
				14.7896	-0.000115058												9.00531	0.110354
				14.7983	-0.000116204												9.01057	0.113282
				14.8071	-0.00011746												9.01583	0.116382
				14.8159	-0.000118302												9.0211	0.119443
				14.8246	-0.000116962												9.02636	0.122303
				14.8334	-0.000116568												9.03162	0.125081
				14.8422	-0.000116659												9.03689	0.127988
				14.851	-0.00011675												9.04215	0.13108
				14.8597	-0.000116632												9.04741	0.134273
				14.8685	-0.000116753												9.05267	0.137604
				14.8773	-0.000117025												9.05794	0.140908
				14.886	-0.000117297												9.0632	0.143968
				14.8948	-0.000115978												9.06846	0.146843
				14.9036	-0.000115798												9.07373	0.149661
				14.9124	-0.000115897												9.07899	0.152525
				14.9211	-0.000115996												9.08425	0.1555
				14.9299	-0.000116487												9.08952	0.158476
				14.9387	-0.000116978												9.09478	0.161236
				14.9475	-0.000117971												9.10004	0.163785
				14.9562	-0.000118968												9.10531	0.166384
				14.965	-0.000118121												9.11057	0.169091
				14.9738	-0.000118356												9.11583	0.171832
				14.9825	-0.000118591												9.1211	0.174685
				14.9913	-0.000118973												9.12636	0.177576
				15.0001	-0.000119244												9.13162	0.180218
				15.0089	-0.000119514												9.13689	0.182599
				15.0176	-0.0001213												9.14215	0.18494
				15.0264	-0.000123096												9.14741	0.187227
				15.0352	-0.000122927												9.15268	0.189485
				15.0439	-0.000122965												9.15794	0.191776
				15.0527	-0.000123684												9.1632	0.19384
				15.0615	-0.000124403												9.16847	0.19563
				15.0703	-0.000124575												9.17373	0.1974
				15.079	-0.000124746												9.17899	0.199279
				15.0878	-0.000127412												9.18425	0.2013
				15.0966	-0.000128681												9.18952	0.203399
				15.1053	-0.000127317												9.19478	0.205534
				15.1141	-0.000127292												9.20004	0.207471
				15.1229	-0.000127466												9.20531	0.209053
				15.1317	-0.00012764												9.21057	0.210505
				15.1404	-0.000127858												9.21583	0.211887
				15.1492	-0.000128964												9.2211	0.213232
				15.158	-0.000130161												9.22636	0.214608
				15.1668	-0.000129427												9.23162	0.215773
				15.1755	-0.000127066												9.23689	0.216558
				15.1843	-0.000126727												9.24215	0.217269
				15.1931	-0.000126389												9.24741	0.21816
				15.2018	-0.000124734												9.25268	0.219221
				15.2106	-0.000122767												9.25794	0.220345
				15.2194	-0.000122424												9.2632	0.221581
				15.2282	-0.000122376												9.26847	0.222794
				15.2369	-0.000122376												9.27373	0.223567
				15.2457	-0.000120974												9.27899	0.224108
				15.2545	-0.000119107												9.28426	0.224589
				15.2632	-0.000119141												9.28952	0.225048
				15.272	-0.000118985												9.29478	0.22557
				15.2808	-0.000118798												9.30005	0.225742
				15.2896	-0.00011883												9.30531	0.225733
				15.2983	-0.000118861												9.31057	0.225725
				15.3071	-0.00011801												9.31583	0.225729
				15.3159	-0.000116841												9.3211	0.225931
				15.3246	-0.000115161												9.32636	0.226245
				15.3334	-0.00011504												9.33162	0.226724
				15.3422	-0.000114918												9.33689	0.227275
				15.351	-0.000115384												9.34215	0.227285
				15.3597	-0.00011585												9.34741	0.227275
				15.3685	-0.000116707												9.35268	0.227214
				15.3773	-0.000117463												9.35794	0.227153
				15.3861	-0.00011719												9.3632	0.227025
				15.3948	-0.000117518												9.36847	0.22692
				15.4036	-0.000117846												9.37373	0.226543
				15.4124	-0.000119169												9.37899	0.225868
				15.4211	-0.000119743												9.38426	0.225383
				15.4299	-0.000120974												9.38952	0.225191
				15.4387	-0.000123019												9.39478	0.225143
				15.4475	-0.000124831												9.40005	0.225257
				15.4562	-0.000125183												9.40531	0.225364
				15.465	-0.000125534												9.41057	0.225384
				15.4738	-0.000126088												9.41584	0.225219
				15.4825	-0.000128938												9.4211	0.225054
				15.4913	-0.000130254												9.42636	0.224791
				15.5001	-0.00013219												9.43163	0.224554
				15.5089	-0.000135521												9.43689	0.224417
				15.5176	-0.000136996												9.44215	0.224153
				15.5264	-0.000137339												9.44741	0.223571
				15.5352	-0.000138386												9.45268	0.223059
				15.5439	-0.000139559												9.45794	0.222861
				15.5527	-0.000140826												9.4632	0.222948
				15.5615	-0.000142352												9.46847	0.22313
				15.5703	-0.000144569												9.47373	0.223562
				15.579	-0.000147322												9.47899	0.22408
				15.5878	-0.000149133												9.48426	0.224085
				15.5966	-0.000149355												9.48952	0.224078
				15.6054	-0.000150579												9.49478	0.22407
				15.6141	-0.000153326												9.50005	0.22415
				15.6229	-0.000155187												9.50531	0.224368
				15.6317	-0.000156695												9.51057	0.224473
				15.6404	-0.000159609												9.51584	0.224481
				15.6492	-0.00016274												9.5211	0.224489
				15.658	-0.000164776												9.52636	0.224704
				15.6668	-0.000166331												9.53163	0.225242
				15.6755	-0.000167723												9.53689	0.225947
				15.6843	-0.000169788												9.54215	0.226877
				15.6931	-0.000172025												9.54742	0.227987
				15.7018	-0.000173998												9.55268	0.228851
				15.7106	-0.000176934												9.55794	0.22943
				15.7194	-0.000180673												9.56321	0.229986
				15.7282	-0.000182669												9.56847	0.230701
				15.7369	-0.00018334												9.57373	0.231606
				15.7457	-0.000184865												9.57899	0.232577
				15.7545	-0.000187378												9.58426	0.233421
				15.7632	-0.000190347												9.58952	0.234123
				15.772	-0.000192818												9.59478	0.234951
				15.7808	-0.000196171												9.60005	0.236042
				15.7896	-0.000199957												9.60531	0.237367
				15.7983	-0.000202337												9.61057	0.238944
				15.8071	-0.000203096												9.61584	0.240675
				15.8159	-0.000203922												9.6211	0.242221
				15.8247	-0.000205667												9.62636	0.243548
				15.8334	-0.000207249												9.63163	0.244546
				15.8422	-0.00020882												9.63689	0.244656
				15.851	-0.000210854												9.64215	0.244854
				15.8597	-0.000213691												9.64742	0.246141
				15.8685	-0.000214944												9.65268	0.24771
				15.8773	-0.00021514												9.65794	0.249089
				15.8861	-0.000215337												9.66321	0.250479
				15.8948	-0.00021715												9.66847	0.252111
				15.9036	-0.000218264												9.67373	0.254012
				15.9124	-0.000218641												9.679	0.256055
				15.9211	-0.000220199												9.68426	0.258253
				15.9299	-0.000223109												9.68952	0.260497
				15.9387	-0.000224645												9.69479	0.262469
				15.9475	-0.000224712												9.70005	0.264306
				15.9562	-0.00022526												9.70531	0.26618
				15.965	-0.000225807												9.71057	0.26808
				15.9738	-0.000226344												9.71584	0.270129
				15.9825	-0.000226882												9.7211	0.272144
				15.9913	-0.00022742												9.72636	0.273928
				16.0001	-0.000229173												9.73163	0.275635
				16.0089	-0.000229376												9.73689	0.277513
				16.0176	-0.000228352												9.74215	0.279628
				16.0264	-0.000228354												9.74742	0.281848
				16.0352	-0.000228517												9.75268	0.284186
				16.044	-0.000228681												9.75794	0.286572
				16.0527	-0.000228502												9.76321	0.288725
				16.0615	-0.000228521												9.76847	0.290641
				16.0703	-0.00022854												9.77373	0.292512
				16.079	-0.000228604												9.779	0.294445
				16.0878	-0.000227097												9.78426	0.296466
				16.0966	-0.000226462												9.78952	0.298479
				16.1054	-0.000226416												9.79479	0.3003
				16.1141	-0.00022604												9.80005	0.30187
				16.1229	-0.000226354												9.80531	0.303509
				16.1317	-0.000226668												9.81058	0.305365
				16.1404	-0.000227239												9.81584	0.307363
				16.1492	-0.00022787												9.8211	0.309469
				16.158	-0.000226903												9.82637	0.311639
				16.1668	-0.000226789												9.83163	0.313614
				16.1755	-0.000226674												9.83689	0.315244
				16.1843	-0.000226642												9.84215	0.316851
				16.1931	-0.000226739												9.84742	0.318458
				16.2018	-0.000227208												9.85268	0.320003
				16.2106	-0.000227677												9.85794	0.321625
				16.2194	-0.000227357												9.86321	0.323088
				16.2282	-0.000225553												9.86847	0.324187
				16.2369	-0.000225225												9.87373	0.325267
				16.2457	-0.000224897												9.879	0.326561
				16.2545	-0.000224916												9.88426	0.328009
				16.2633	-0.00022515												9.88952	0.329513
				16.272	-0.000225385												9.89479	0.331097
				16.2808	-0.000225751												9.90005	0.332593
				16.2896	-0.000223865												9.90531	0.333745
				16.2983	-0.00022179												9.91058	0.334666
				16.3071	-0.000220107												9.91584	0.335533
				16.3159	-0.000218645												9.9211	0.336398
				16.3247	-0.000217795												9.92637	0.337358
				16.3334	-0.000217452												9.93163	0.338201
				16.3422	-0.000217393												9.93689	0.338586
				16.351	-0.000217335												9.94216	0.338894
				16.3597	-0.000216976												9.94742	0.339438
				16.3685	-0.00021398												9.95268	0.340142
				16.3773	-0.00021154												9.95795	0.340909
				16.3861	-0.000210823												9.96321	0.341767
				16.3948	-0.000209267												9.96847	0.342705
				16.4036	-0.000208786												9.97373	0.343226
				16.4124	-0.000208306												9.979	0.343343
				16.4211	-0.000208184												9.98426	0.343485
				16.4299	-0.000206573												9.98952	0.343626
				16.4387	-0.00020424												9.99479	0.343615
				16.4475	-0.000202459												10.0001	0.343532
				16.4562	-0.000201962												10.0053	0.343449
				16.465	-0.000201195												10.0106	0.342869
				16.4738	-0.000201363												10.0158	0.342434
				16.4826	-0.000201531												10.0211	0.342218
				16.4913	-0.000201777												10.0264	0.34215
				16.5001	-0.000200563												10.0316	0.342258
				16.5089	-0.000197613												10.0369	0.342158
				16.5176	-0.000197181												10.0422	0.342059
				16.5264	-0.000196749												10.0474	0.341807
				16.5352	-0.000196034												10.0527	0.341188
				16.544	-0.000196391												10.0579	0.34054
				16.5527	-0.000196747												10.0632	0.33984
				16.5615	-0.000197475												10.0685	0.339229
				16.5703	-0.000197441												10.0737	0.338346
				16.579	-0.000197208												10.079	0.337071
				16.5878	-0.000197491												10.0843	0.335858
				16.5966	-0.000197774												10.0895	0.334955
				16.6054	-0.000198751												10.0948	0.334288
				16.6141	-0.000199851												10.1001	0.333648
				16.6229	-0.000200951												10.1053	0.333174
				16.6317	-0.000203097												10.1106	0.33264
				16.6404	-0.000204256												10.1158	0.331662
				16.6492	-0.0002045												10.1211	0.330526
				16.658	-0.000204744												10.1264	0.329346
				16.6668	-0.000205686												10.1316	0.328101
				16.6755	-0.000206812												10.1369	0.32696
				16.6843	-0.000207829												10.1422	0.325666
				16.6931	-0.000210395												10.1474	0.323914
				16.7019	-0.000213515												10.1527	0.322104
				16.7106	-0.000215238												10.1579	0.320661
				16.7194	-0.000215697												10.1632	0.319487
				16.7282	-0.000216155												10.1685	0.318416
				16.7369	-0.000217159												10.1737	0.317557
				16.7457	-0.000217914												10.179	0.316743
				16.7545	-0.000218917												10.1843	0.315562
				16.7633	-0.000221637												10.1895	0.314055
				16.772	-0.00022366												10.1948	0.312506
				16.7808	-0.000224517												10.2001	0.311027
				16.7896	-0.000224355												10.2053	0.309605
				16.7983	-0.000224489												10.2106	0.308114
				16.8071	-0.000224648												10.2158	0.30625
				16.8159	-0.000224808												10.2211	0.304199
				16.8247	-0.000225497												10.2264	0.302439
				16.8334	-0.000227458												10.2316	0.30098
				16.8422	-0.000229789												10.2369	0.299677
				16.851	-0.000230516												10.2422	0.298585
				16.8597	-0.000231013												10.2474	0.297685
				16.8685	-0.000231509												10.2527	0.296472
				16.8773	-0.00023255												10.2579	0.294835
				16.8861	-0.00023398												10.2632	0.293133
				16.8948	-0.000234776												10.2685	0.291497
				16.9036	-0.000235573												10.2737	0.289925
				16.9124	-0.000238145												10.279	0.288386
				16.9212	-0.000239398												10.2843	0.286564
				16.9299	-0.000239514												10.2895	0.284422
				16.9387	-0.000239958												10.2948	0.282428
				16.9475	-0.000240403												10.3001	0.280788
				16.9562	-0.000241312												10.3053	0.2794
				16.965	-0.000242356												10.3106	0.278157
				16.9738	-0.000244334												10.3158	0.277165
				16.9826	-0.000245588												10.3211	0.276086
				16.9913	-0.00024615												10.3264	0.274649
				17.0001	-0.00024597												10.3316	0.273078
				17.0089	-0.000246141												10.3369	0.271475
				17.0176	-0.000246312												10.3422	0.269884
				17.0264	-0.000247725												10.3474	0.268426
				17.0352	-0.0002475												10.3527	0.266828
				17.044	-0.000247679												10.3579	0.264841
				17.0527	-0.000247858												10.3632	0.262891
				17.0615	-0.000246998												10.3685	0.261343
				17.0703	-0.000244929												10.3737	0.260121
				17.079	-0.000243001												10.379	0.259045
				17.0878	-0.000241486												10.3843	0.258277
				17.0966	-0.000239297												10.3895	0.25763
				17.1054	-0.000237201												10.3948	0.256537
				17.1141	-0.000236338												10.4001	0.255169
				17.1229	-0.000235465												10.4053	0.253834
				17.1317	-0.000232107												10.4106	0.252559
				17.1405	-0.000227413												10.4158	0.251411
				17.1492	-0.000224669												10.4211	0.250192
				17.158	-0.000222446												10.4264	0.248686
				17.1668	-0.00021839												10.4316	0.247051
				17.1755	-0.000215318												10.4369	0.245713
				17.1843	-0.000213384												10.4422	0.244747
				17.1931	-0.000210045												10.4474	0.243939
				17.2019	-0.000206111												10.4527	0.243387
				17.2106	-0.000201667												10.4579	0.243012
[truncated: 1,796 more rows]
