# Supplementary material for: LC8 enhances 53BP1 foci through heterogeneous bridging of 53BP1 oligomers
Source: eLife. 2025 Apr 29;14:e102179. doi: 10.7554/eLife.102179 (PMC12187134; doi:10.7554/eLife.102179)
Supplement: Figure 4—source data 1. [file elife-102179-fig4-data1.xlsx]

## Sheet: SEC-MALS QT2-OD
volume (mL)	Molar Mass 1	volume (mL)	Molar Mass 2	volume (mL)	Molar Mass 3	volume (mL)	Molar Mass 4		volume (mL)	RI
16.0309	26624.1	10.9775	86164.8	10.1293	110411	9.18551	198261		1.83443	0.000185545
16.0369	26766.1	10.9835	86006.6	10.1353	110090	9.19148	198018		1.84057	0.00017759
16.0429	26575.3	10.9894	85812.7	10.1412	109498	9.19745	196352		1.84672	0.000180869
16.0488	26438.7	10.9954	85670.4	10.1472	109057	9.20343	195048		1.85286	0.000176747
16.0548	26354.1	11.0014	85499.5	10.1532	108693	9.2094	194064		1.859	0.000172625
16.0608	26194.5	11.0074	85279	10.1592	108378	9.21537	193176		1.86515	0.00016396
16.0667	26051.7	11.0133	85139	10.1651	108043	9.22135	192426		1.87129	0.000147252
16.0727	25997	11.0193	84990.1	10.1711	107924	9.22732	191847		1.87744	0.000144966
16.0787	26001.2	11.0253	84886.4	10.1771	107782	9.23329	191182		1.88358	0.000143458
16.0847	25970.7	11.0313	84792.2	10.183	107679	9.23927	190467		1.88972	0.000127384
16.0906	25926	11.0372	84715.2	10.189	107548	9.24524	189547		1.89587	9.53928e-05
16.0966	25876.2	11.0432	84642.1	10.195	107405	9.25121	188545		1.90201	7.87932e-05
16.1026	25805.1	11.0492	84520.5	10.201	107032	9.25719	187364		1.90815	7.49452e-05
16.1086	25719.4	11.0552	84221.8	10.2069	106495	9.26316	185913		1.9143	6.9182e-05
16.1145	25609.5	11.0611	83915.2	10.2129	105979	9.26913	185004		1.92044	7.04647e-05
16.1205	25524.4	11.0671	83746.5	10.2189	105592	9.27511	184392		1.92658	6.78771e-05
16.1265	25398.8	11.0731	83550.6	10.2249	105274	9.28108	183752		1.93273	6.52894e-05
16.1325	25310.9	11.079	83384.5	10.2308	104949	9.28705	182746		1.93887	5.63e-05
16.1384	25227.6	11.085	83220.9	10.2368	104627	9.29303	181589		1.94501	4.69881e-05
16.1444	25172.3	11.091	83081.6	10.2428	104316	9.299	180110		1.95116	4.511e-05
16.1504	25118.3	11.097	82919.5	10.2488	104072	9.30497	178557		1.9573	4.43944e-05
16.1563	25122.3	11.1029	82758.3	10.2547	103840	9.31095	176930		1.96345	2.62842e-05
16.1623	25051.8	11.1089	82609.4	10.2607	103612	9.31692	175473		1.96959	1.54614e-05
16.1683	24977.4	11.1149	82490	10.2667	103434	9.32289	174500		1.97573	2.5311e-05
16.1743	24864.9	11.1209	82363.6	10.2726	103260	9.32887	173967		1.98188	3.6455e-05
16.1802	24792.4	11.1268	82223.6	10.2786	103090	9.33484	173481		1.98802	4.61903e-05
16.1862	24733.2	11.1328	82054.4	10.2846	102887	9.34081	173010		1.99416	5.06268e-05
16.1922	24628.8	11.1388	81873.8	10.2906	102704	9.34679	172525		2.00031	5.00333e-05
16.1982	24569.5	11.1447	81706.8	10.2965	102554	9.35276	172058		2.00645	4.94399e-05
16.2041	24449.9	11.1507	81557.7	10.3025	102403	9.35873	171762		2.01259	4.76166e-05
16.2101	24392.4	11.1567	81414.9	10.3085	102233	9.36471	171541		2.01874	5.23925e-05
16.2161	24305.5	11.1627	81285.9	10.3145	102036	9.37068	171382		2.02488	5.21313e-05
16.2221	24285.7	11.1686	81152.4	10.3204	101869	9.37665	171171		2.03103	5.18702e-05
16.228	24211.3	11.1746	80965.9	10.3264	101638	9.38263	171218		2.03717	4.17214e-05
16.234	24130.1	11.1806	80737.8	10.3324	101397	9.3886	171373		2.04331	3.6624e-05
16.24	24027.3	11.1866	80532.9	10.3384	101186	9.39457	171132		2.04946	4.01631e-05
16.2459	23941.7	11.1925	80360.9	10.3443	101194	9.40055	170202		2.0556	5.57001e-05
16.2519	23888.4	11.1985	80215.2	10.3503	101189	9.40652	169683		2.06174	5.66295e-05
16.2579	23806.6	11.2045	80083.9	10.3563	101188	9.41249	169463		2.06789	5.65075e-05
16.2639	23705.6	11.2105	79959.4	10.3622	101156	9.41847	169017		2.07403	5.60109e-05
16.2698	23615.5	11.2164	79846.7	10.3682	101111	9.42444	168205		2.08017	5.55142e-05
16.2758	23540	11.2224	79741.7	10.3742	100964	9.43041	167089		2.08632	4.99709e-05
16.2818	23455.2	11.2284	79641.2	10.3802	100853	9.43639	165970		2.09246	4.70918e-05
16.2878	23412.2	11.2343	79520.3	10.3861	100640	9.44236	164878		2.0986	4.42128e-05
16.2937	23370.7	11.2403	79377	10.3921	100475	9.44833	163820		2.10475	3.97761e-05
16.2997	23318.2	11.2463	79208.1			9.45431	162602		2.11089	3.06411e-05
16.3057	23257.6	11.2523	79035.6			9.46028	161362		2.11704	2.17829e-05
16.3117	23187.2	11.2582	78859.1			9.46625	160287		2.12318	3.33613e-05
16.3176	23119.1	11.2642	78628.7			9.47223	159329		2.12932	3.9677e-05
16.3236	23051.2	11.2702	78394.9			9.4782	158437		2.13547	4.16692e-05
16.3296	22984.4	11.2762	78175.1			9.48417	157559		2.14161	4.36613e-05
16.3355	22903.6	11.2821	77968			9.49015	156398		2.14775	4.52854e-05
16.3415	22837.8	11.2881	77781.3			9.49612	155122		2.1539	4.87077e-05
16.3475	22776.6	11.2941	77623			9.50209	153940		2.16004	4.94985e-05
16.3535	22732.9	11.3001	77443.6			9.50807	152828		2.16618	4.20295e-05
16.3594	22688.1	11.306	77263.3			9.51404	151816		2.17233	3.45604e-05
16.3654	22648.6	11.312	77064.8			9.52001	151066		2.17847	1.93293e-05
16.3714	22590.4	11.318	76863.2			9.52599	150574		2.18461	1.79671e-05
16.3774	22535.2	11.3239	76690.2			9.53196	150321		2.19076	2.28864e-05
16.3833	22487.1	11.3299	76558.3			9.53793	150252		2.1969	3.3024e-05
16.3893	22430	11.3359	76449.3			9.54391	150214		2.20305	3.29017e-05
16.3953	22387.5	11.3419	76299.2			9.54988	150053		2.20919	3.23434e-05
16.4013	22330.7	11.3478	76144.5			9.55585	149381		2.21533	3.17852e-05
16.4072	22281.7	11.3538	76004.6			9.56183	148325		2.22148	3.07121e-05
16.4132	22223.9	11.3598	75815.3			9.5678	147373		2.22762	3.12765e-05
16.4192	22178.2	11.3658	75589.5			9.57377	146733		2.23376	2.84196e-05
16.4251	22126.3	11.3717	75401.9			9.57975	146321		2.23991	2.55627e-05
16.4311	22085.3	11.3777	75207			9.58572	146107		2.24605	1.27461e-05
16.4371	22036.6	11.3837	74952.4						2.25219	4.74838e-06
16.4431	21984.7	11.3897	74740.1						2.25834	6.00803e-06
16.449	21933.3	11.3956	74565.8						2.26448	2.44222e-05
16.455	21883.9	11.4016	74373.6						2.27062	4.71114e-05
16.461	21834.9	11.4076	74164.6						2.27677	6.07414e-05
16.467	21792.2	11.4135	73925.8						2.28291	6.60582e-05
16.4729	21756.8								2.28906	7.10611e-05
16.4789	21726.6								2.2952	8.17745e-05
16.4849	21695.3								2.30134	9.82045e-05
16.4909	21652.1								2.30749	0.000103418
16.4968	21606.2								2.31363	0.000103465
16.5028	21561								2.31977	0.000103512
16.5088	21519.4								2.32592	0.000112273
16.5147	21477.3								2.33206	0.000131239
16.5207	21432.8								2.3382	0.000152679
16.5267	21388								2.34435	0.000164061
16.5327	21344.4								2.35049	0.000172345
16.5386	21308.9								2.35663	0.000189206
16.5446	21284.5								2.36278	0.00019611
16.5506	21263.1								2.36892	0.000205019
16.5566	21236.6								2.37507	0.000205568
16.5625	21199.2								2.38121	0.000204977
16.5685	21152.3								2.38735	0.000204387
16.5745	21097.2								2.3935	0.000204136
16.5805	21059.3								2.39964	0.000216598
16.5864	21030.3								2.40578	0.0002378
16.5924	20988.2								2.41193	0.000258487
16.5984	20948.8								2.41807	0.000263205
16.6043	20906.3								2.42421	0.000269625
16.6103	20880.3								2.43036	0.000279603
16.6163	20849.5								2.4365	0.000283495
16.6223	20830.2								2.44264	0.000286987
16.6282	20794.2								2.44879	0.000288534
16.6342	20761.1								2.45493	0.000289084
16.6402	20720.9								2.46108	0.000289135
16.6462	20674.2								2.46722	0.000289187
16.6521	20641.3								2.47336	0.000303001
16.6581	20623.6								2.47951	0.000322013
16.6641	20598.2								2.48565	0.000325285
16.6701	20560.7								2.49179	0.000326027
16.676	20529.9								2.49794	0.000326768
16.682	20497.9								2.50408	0.000329045
16.688	20480.7								2.51022	0.000329835
16.6939	20449.6								2.51637	0.000328297
16.6999	20419.3								2.52251	0.000326758
16.7059	20375								2.52865	0.000321121
16.7119	20332.5								2.5348	0.000315688
16.7178	20306								2.54094	0.000312578
16.7238	20310								2.54709	0.000322974
16.7298	20332.7								2.55323	0.000328924
16.7358	20331.6								2.55937	0.000329128
16.7417	20299.9								2.56552	0.000329332
16.7477	20260.9								2.57166	0.000332034
16.7537	20245.3								2.5778	0.000333158
16.7597	20242.8								2.58395	0.000332537
16.7656	20225.8								2.59009	0.000331916
16.7716	20200								2.59623	0.000326577
16.7776	20168.1								2.60238	0.000323552
16.7835	20134								2.60852	0.000324729
16.7895	20078								2.61466	0.000332846
16.7955	20044.4								2.62081	0.000351128
16.8015	20004.2								2.62695	0.000359538
16.8074	19976.3								2.6331	0.000366674
16.8134	19938.6								2.63924	0.000371351
16.8194	19914.1								2.64538	0.000374943
16.8254	19923.4								2.65153	0.000379038
16.8313	19918.2								2.65767	0.000378474
16.8373	19875.6								2.66381	0.00037791
16.8433	19827.4								2.66996	0.000368944
16.8493	19805.5								2.6761	0.00036513
16.8552	19750.8								2.68224	0.000367398
16.8612	19739								2.68839	0.000387158
16.8672	19686.6								2.69453	0.000395747
16.8731	19665.1								2.70068	0.000393973
16.8791	19608.7								2.70682	0.000392198
16.8851	19576.7								2.71296	0.000384433
16.8911	19546.3								2.71911	0.000380383
16.897	19569.3								2.72525	0.000378923
16.903	19554.9								2.73139	0.000353661
16.909	19527.8								2.73754	0.000331788
16.915	19462.9								2.74368	0.000319038
16.9209	19364.8								2.74982	0.000311249
16.9269	19287.2								2.75597	0.000314283
16.9329	18966.8								2.76211	0.000315055
									2.76825	0.00030959
10.9775	86164.8								2.7744	0.000304125
10.9835	86006.6								2.78054	0.000296436
10.9894	85812.7								2.78669	0.000293949
10.9954	85670.4								2.79283	0.000291462
11.0014	85499.5								2.79897	0.000286384
11.0074	85279								2.80512	0.000272294
11.0133	85139								2.81126	0.000263633
11.0193	84990.1								2.8174	0.000262071
11.0253	84886.4								2.82355	0.000268884
11.0313	84792.2								2.82969	0.000281617
11.0372	84715.2								2.83583	0.000281929
11.0432	84642.1								2.84198	0.000282242
11.0492	84520.5								2.84812	0.000282129
11.0552	84221.8								2.85426	0.000281318
11.0611	83915.2								2.86041	0.000280507
11.0671	83746.5								2.86655	0.000278997
11.0731	83550.6								2.8727	0.000261598
11.079	83384.5								2.87884	0.000243975
11.085	83220.9								2.88498	0.000235511
11.091	83081.6								2.89113	0.0002369
11.097	82919.5								2.89727	0.000253823
11.1029	82758.3								2.90341	0.000261915
11.1089	82609.4								2.90956	0.000264486
11.1149	82490								2.9157	0.000263117
11.1209	82363.6								2.92184	0.000261749
11.1268	82223.6								2.92799	0.000261581
11.1328	82054.4								2.93413	0.000261247
11.1388	81873.8								2.94027	0.000260913
11.1447	81706.8								2.94642	0.000237148
11.1507	81557.7								2.95256	0.000233579
11.1567	81414.9								2.95871	0.00023363
11.1627	81285.9								2.96485	0.000233681
11.1686	81152.4								2.97099	0.000230955
11.1746	80965.9								2.97714	0.000228229
11.1806	80737.8								2.98328	0.000220814
11.1866	80532.9								2.98942	0.000211879
11.1925	80360.9								2.99557	0.000204609
11.1985	80215.2								3.00171	0.000200207
11.2045	80083.9								3.00785	0.000191558
11.2105	79959.4								3.014	0.000166244
11.2164	79846.7								3.02014	0.000154387
11.2224	79741.7								3.02628	0.000148076
11.2284	79641.2								3.03243	0.000132856
11.2343	79520.3								3.03857	0.00013212
11.2403	79377								3.04472	0.000130878
11.2463	79208.1								3.05086	0.000125635
11.2523	79035.6								3.057	0.000120684
11.2582	78859.1								3.06315	9.85534e-05
11.2642	78628.7								3.06929	8.95349e-05
11.2702	78394.9								3.07543	8.54374e-05
11.2762	78175.1								3.08158	6.21291e-05
11.2821	77968								3.08772	3.74478e-05
11.2881	77781.3								3.09386	2.26675e-05
11.2941	77623								3.10001	1.9062e-05
11.3001	77443.6								3.10615	2.10121e-05
11.306	77263.3								3.11229	2.18525e-05
11.312	77064.8								3.11844	1.38436e-05
11.318	76863.2								3.12458	5.83468e-06
11.3239	76690.2								3.13073	-4.81503e-06
11.3299	76558.3								3.13687	-4.61258e-06
11.3359	76449.3								3.14301	-7.66654e-06
11.3419	76299.2								3.14916	-1.07205e-05
11.3478	76144.5								3.1553	-2.9512e-05
11.3538	76004.6								3.16144	-4.46409e-05
11.3598	75815.3								3.16759	-4.53017e-05
11.3658	75589.5								3.17373	-3.80666e-05
11.3717	75401.9								3.17987	-3.00334e-05
11.3777	75207								3.18602	-2.64313e-05
11.3837	74952.4								3.19216	-2.64016e-05
11.3897	74740.1								3.1983	-2.67849e-05
11.3956	74565.8								3.20445	-2.71682e-05
11.4016	74373.6								3.21059	-2.97924e-05
11.4076	74164.6								3.21674	-3.70825e-05
11.4135	73925.8								3.22288	-5.46391e-05
									3.22902	-7.10796e-05
10.1293	110411								3.23517	-8.82447e-05
10.1353	110090								3.24131	-9.46549e-05
10.1412	109498								3.24745	-9.10462e-05
10.1472	109057								3.2536	-8.99124e-05
10.1532	108693								3.25974	-9.29796e-05
10.1592	108378								3.26588	-9.60469e-05
10.1651	108043								3.27203	-0.000110442
10.1711	107924								3.27817	-0.0001238
10.1771	107782								3.28431	-0.000127886
10.183	107679								3.29046	-0.000131972
10.189	107548								3.2966	-0.000141929
10.195	107405								3.30275	-0.000153598
10.201	107032								3.30889	-0.000149707
10.2069	106495								3.31503	-0.000144642
10.2129	105979								3.32118	-0.000140481
10.2189	105592								3.32732	-0.000139222
10.2249	105274								3.33346	-0.000140782
10.2308	104949								3.33961	-0.000142342
10.2368	104627								3.34575	-0.000142689
10.2428	104316								3.35189	-0.000143035
10.2488	104072								3.35804	-0.000146771
10.2547	103840								3.36418	-0.000159041
10.2607	103612								3.37033	-0.000168908
10.2667	103434								3.37647	-0.000168577
10.2726	103260								3.38261	-0.000165722
10.2786	103090								3.38876	-0.000165157
10.2846	102887								3.3949	-0.000156322
10.2906	102704								3.40104	-0.0001564
10.2965	102554								3.40719	-0.000157068
10.3025	102403								3.41333	-0.000157736
10.3085	102233								3.41947	-0.000161691
10.3145	102036								3.42562	-0.000165647
10.3204	101869								3.43176	-0.000175264
10.3264	101638								3.4379	-0.000183562
10.3324	101397								3.44405	-0.000186101
10.3384	101186								3.45019	-0.000194152
10.3443	101194								3.45634	-0.000189154
10.3503	101189								3.46248	-0.000178688
10.3563	101188								3.46862	-0.000179543
10.3622	101156								3.47477	-0.000180397
10.3682	101111								3.48091	-0.000183029
10.3742	100964								3.48705	-0.000193675
10.3802	100853								3.4932	-0.00019801
10.3861	100640								3.49934	-0.000202345
10.3921	100475								3.50548	-0.000212724
									3.51163	-0.000223782
9.18551	198261								3.51777	-0.000222719
9.19148	198018								3.52391	-0.000215775
9.19745	196352								3.53006	-0.000206163
9.20343	195048								3.5362	-0.000201655
9.2094	194064								3.54235	-0.000200835
9.21537	193176								3.54849	-0.000200015
9.22135	192426								3.55463	-0.000198024
9.22732	191847								3.56078	-0.000195064
9.23329	191182								3.56692	-0.000196226
9.23927	190467								3.57306	-0.000197388
9.24524	189547								3.57921	-0.000214001
9.25121	188545								3.58535	-0.000218618
9.25719	187364								3.59149	-0.000220835
9.26316	185913								3.59764	-0.000210384
9.26913	185004								3.60378	-0.00020672
9.27511	184392								3.60992	-0.000205026
9.28108	183752								3.61607	-0.000203332
9.28705	182746								3.62221	-0.000200396
9.29303	181589								3.62836	-0.000200861
9.299	180110								3.6345	-0.000201325
9.30497	178557								3.64064	-0.000202192
9.31095	176930								3.64679	-0.000216483
9.31692	175473								3.65293	-0.000222879
9.32289	174500								3.65907	-0.000216772
9.32887	173967								3.66522	-0.000204363
9.33484	173481								3.67136	-0.000189054
9.34081	173010								3.6775	-0.000172813
9.34679	172525								3.68365	-0.00016591
9.35276	172058								3.68979	-0.000162691
9.35873	171762								3.69593	-0.000162445
9.36471	171541								3.70208	-0.000160004
9.37068	171382								3.70822	-0.000161876
9.37665	171171								3.71437	-0.000163748
9.38263	171218								3.72051	-0.000171655
9.3886	171373								3.72665	-0.000179431
9.39457	171132								3.7328	-0.000178047
9.40055	170202								3.73894	-0.000159501
9.40652	169683								3.74508	-0.000147345
9.41249	169463								3.75123	-0.000147348
9.41847	169017								3.75737	-0.000147048
9.42444	168205								3.76351	-0.000146749
9.43041	167089								3.76966	-0.000148789
9.43639	165970								3.7758	-0.000150829
9.44236	164878								3.78194	-0.000155196
9.44833	163820								3.78809	-0.000162188
9.45431	162602								3.79423	-0.000168849
9.46028	161362								3.80038	-0.000169657
9.46625	160287								3.80652	-0.000167598
9.47223	159329								3.81266	-0.000152799
9.4782	158437								3.81881	-0.000149999
9.48417	157559								3.82495	-0.000148977
9.49015	156398								3.83109	-0.000147954
9.49612	155122								3.83724	-0.000144433
9.50209	153940								3.84338	-0.000144523
9.50807	152828								3.84952	-0.000147027
9.51404	151816								3.85567	-0.000149532
9.52001	151066								3.86181	-0.000158382
9.52599	150574								3.86795	-0.000154013
9.53196	150321								3.8741	-0.000146131
9.53793	150252								3.88024	-0.000139508
9.54391	150214								3.88639	-0.000134144
9.54988	150053								3.89253	-0.000132096
9.55585	149381								3.89867	-0.00013595
9.56183	148325								3.90482	-0.000139803
9.5678	147373								3.91096	-0.000140502
9.57377	146733								3.9171	-0.0001412
9.57975	146321								3.92325	-0.000144243
9.58572	146107								3.92939	-0.000154092
									3.93553	-0.00015419
									3.94168	-0.000154288
									3.94782	-0.00015003
									3.95396	-0.000138991
									3.96011	-0.000132977
									3.96625	-0.000128198
									3.9724	-0.00012776
									3.97854	-0.000127322
									3.98468	-0.000128563
									3.99083	-0.000129805
									3.99697	-0.000135907
									4.00311	-0.000147231
									4.00926	-0.000139707
									4.0154	-0.000120712
									4.02154	-0.000104712
									4.02769	-0.000103003
									4.03383	-0.000102313
									4.03998	-0.000101622
									4.04612	-9.92555e-05
									4.05226	-9.52038e-05
									4.05841	-9.50654e-05
									4.06455	-9.86276e-05
									4.07069	-0.00010219
									4.07684	-0.000102625
									4.08298	-0.000103061
									4.08912	-8.66289e-05
									4.09527	-8.14037e-05
									4.10141	-7.90307e-05
									4.10755	-7.66577e-05
									4.1137	-7.56708e-05
									4.11984	-6.56434e-05
									4.12599	-6.47775e-05
									4.13213	-6.6727e-05
									4.13827	-6.86764e-05
									4.14442	-7.35871e-05
									4.15056	-7.28688e-05
									4.1567	-6.88202e-05
									4.16285	-5.61131e-05
									4.16899	-5.6388e-05
									4.17513	-5.66629e-05
									4.18128	-5.70052e-05
									4.18742	-5.49752e-05
									4.19356	-5.45444e-05
									4.19971	-5.85778e-05
									4.20585	-6.26112e-05
									4.212	-6.89779e-05
									4.21814	-7.02402e-05
									4.22428	-6.79931e-05
									4.23043	-6.16696e-05
									4.23657	-5.36009e-05
									4.24271	-5.01398e-05
									4.24886	-5.1781e-05
									4.255	-5.34221e-05
									4.26114	-5.00057e-05
									4.26729	-5.01409e-05
									4.27343	-5.66548e-05
									4.27957	-6.31687e-05
									4.28572	-7.03954e-05
									4.29186	-7.22926e-05
									4.29801	-6.82352e-05
									4.30415	-5.66564e-05
									4.31029	-5.56369e-05
									4.31644	-5.58702e-05
									4.32258	-5.61036e-05
									4.32872	-5.7148e-05
									4.33487	-5.81924e-05
									4.34101	-6.06801e-05
									4.34715	-7.90233e-05
									4.3533	-9.21898e-05
									4.35944	-9.20538e-05
									4.36558	-8.55929e-05
									4.37173	-8.3365e-05
									4.37787	-8.2718e-05
									4.38402	-8.34011e-05
									4.39016	-8.40842e-05
									4.3963	-8.71173e-05
									4.40245	-8.84783e-05
									4.40859	-8.98392e-05
									4.41473	-9.25329e-05
									4.42088	-0.000101101
									4.42702	-0.000107492
									4.43316	-0.000103084
									4.43931	-9.04114e-05
									4.44545	-8.54577e-05
									4.45159	-8.39252e-05
									4.45774	-8.23927e-05
									4.46388	-8.15601e-05
									4.47003	-7.62667e-05
									4.47617	-7.61673e-05
									4.48231	-7.71426e-05
									4.48846	-7.81179e-05
									4.4946	-7.98511e-05
									4.50074	-7.83593e-05
									4.50689	-6.44611e-05
									4.51303	-5.66014e-05
									4.51917	-5.38628e-05
									4.52532	-5.31135e-05
									4.53146	-5.38894e-05
									4.5376	-5.46653e-05
									4.54375	-6.3776e-05
									4.54989	-6.92593e-05
									4.55604	-8.00318e-05
									4.56218	-0.000104486
									4.56832	-0.000117872
									4.57447	-0.000124192
									4.58061	-0.000115824
									4.58675	-0.000108212
									4.5929	-0.000107459
									4.59904	-0.000106706
									4.60518	-0.00010217
									4.61133	-9.5478e-05
									4.61747	-9.67273e-05
									4.62361	-9.79767e-05
									4.62976	-0.000102684
									4.6359	-0.000104884
									4.64205	-0.000100066
									4.64819	-8.2499e-05
									4.65433	-6.26045e-05
									4.66048	-6.25779e-05
									4.66662	-6.29253e-05
									4.67276	-6.32727e-05
									4.67891	-6.08764e-05
									4.68505	-5.68774e-05
									4.69119	-5.62262e-05
									4.69734	-6.04463e-05
									4.70348	-6.46664e-05
									4.70963	-6.21043e-05
									4.71577	-5.68049e-05
									4.72191	-5.24789e-05
									4.72806	-4.41886e-05
									4.7342	-4.5068e-05
									4.74034	-4.59473e-05
									4.74649	-4.95137e-05
									4.75263	-4.64359e-05
									4.75877	-4.53257e-05
									4.76492	-5.17505e-05
									4.77106	-5.81752e-05
									4.7772	-6.16044e-05
									4.78335	-5.26395e-05
									4.78949	-3.81706e-05
									4.79564	-3.12874e-05
									4.80178	-2.95727e-05
									4.80792	-2.91788e-05
									4.81407	-2.98616e-05
									4.82021	-3.05444e-05
									4.82635	-3.23694e-05
									4.8325	-3.41944e-05
									4.83864	-3.79463e-05
									4.84478	-4.54844e-05
									4.85093	-4.80148e-05
									4.85707	-3.60383e-05
									4.86321	-1.21757e-05
									4.86936	1.0616e-06
									4.8755	3.86647e-06
									4.88165	6.87021e-06
									4.88779	6.69257e-06
									4.89393	6.27512e-06
									4.90008	5.85767e-06
									4.90622	3.64166e-06
									4.91236	1.45823e-06
									4.91851	-5.37923e-06
									4.92465	-2.19534e-06
									4.93079	2.08537e-05
									4.93694	2.53765e-05
									4.94308	2.71946e-05
									4.94922	2.90126e-05
									4.95537	3.46536e-05
									4.96151	4.42527e-05
									4.96766	4.28009e-05
									4.9738	4.13491e-05
									4.97994	3.68231e-05
									4.98609	3.39365e-05
									4.99223	3.91194e-05
									4.99837	4.32031e-05
									5.00452	5.93102e-05
									5.01066	6.00887e-05
									5.0168	5.94846e-05
									5.02295	5.88804e-05
									5.02909	5.62011e-05
									5.03523	5.22804e-05
									5.04138	4.83597e-05
									5.04752	3.64449e-05
									5.05367	2.14632e-05
									5.05981	2.06369e-05
									5.06595	1.98106e-05
									5.0721	2.97888e-05
									5.07824	3.08105e-05
									5.08438	3.08466e-05
									5.09053	3.08827e-05
									5.09667	3.14495e-05
									5.10281	3.30275e-05
									5.10896	3.04936e-05
									5.1151	2.79597e-05
									5.12124	1.69898e-05
									5.12739	1.35922e-05
									5.13353	1.16422e-05
									5.13968	2.03768e-05
									5.14582	4.01382e-05
									5.15196	4.84282e-05
									5.15811	5.00423e-05
									5.16425	5.22473e-05
									5.17039	5.93944e-05
									5.17654	5.80183e-05
									5.18268	5.66421e-05
									5.18882	5.14413e-05
									5.19497	4.21498e-05
									5.20111	4.35884e-05
									5.20725	5.53349e-05
									5.2134	6.22106e-05
									5.21954	6.51768e-05
									5.22569	6.81429e-05
									5.23183	6.84974e-05
									5.23797	6.83782e-05
									5.24412	6.52009e-05
									5.25026	6.20237e-05
									5.2564	5.57884e-05
									5.26255	3.78216e-05
									5.26869	3.10833e-05
									5.27483	2.95146e-05
									5.28098	4.24422e-05
									5.28712	4.78627e-05
									5.29326	4.83086e-05
									5.29941	4.824e-05
									5.30555	4.6436e-05
									5.3117	4.4632e-05
									5.31784	4.00992e-05
									5.32398	3.55664e-05
									5.33013	1.70153e-05
									5.33627	1.327e-05
									5.34241	1.20278e-05
									5.34856	1.50151e-05
									5.3547	3.10574e-05
									5.36084	3.06144e-05
									5.36699	3.01715e-05
									5.37313	2.76507e-05
									5.37928	2.63937e-05
									5.38542	2.43226e-05
									5.39156	2.22514e-05
									5.39771	1.48188e-05
									5.40385	2.87327e-06
									5.40999	1.44677e-06
									5.41614	-5.18161e-07
									5.42228	1.14395e-05
									5.42842	1.01964e-05
									5.43457	8.95331e-06
									5.44071	5.1253e-06
									5.44685	5.7961e-06
									5.453	3.75423e-06
									5.45914	1.71235e-06
									5.46529	-3.85613e-06
									5.47143	-2.73429e-05
									5.47757	-3.79941e-05
									5.48372	-3.82052e-05
									5.48986	-3.72092e-05
									5.496	-3.26107e-05
									5.50215	-3.12719e-05
									5.50829	-3.645e-05
									5.51443	-4.16282e-05
									5.52058	-4.82288e-05
									5.52672	-4.89477e-05
									5.53286	-4.96666e-05
									5.53901	-6.66545e-05
									5.54515	-7.2783e-05
									5.5513	-6.78116e-05
									5.55744	-6.6342e-05
									5.56358	-5.79604e-05
									5.56973	-4.58656e-05
									5.57587	-4.52564e-05
									5.58201	-4.55627e-05
									5.58816	-4.58691e-05
									5.5943	-4.67102e-05
									5.60044	-4.75514e-05
									5.60659	-5.55454e-05
									5.61273	-7.45791e-05
									5.61887	-7.77784e-05
									5.62502	-7.74014e-05
									5.63116	-7.53304e-05
									5.63731	-6.18291e-05
									5.64345	-6.08792e-05
									5.64959	-6.08073e-05
									5.65574	-6.11745e-05
									5.66188	-6.15416e-05
									5.66802	-6.90705e-05
									5.67417	-7.90395e-05
									5.68031	-9.39192e-05
									5.68645	-0.000101899
									5.6926	-0.000106864
									5.69874	-0.000101255
									5.70488	-9.87819e-05
									5.71103	-9.79596e-05
									5.71717	-0.000100205
									5.72332	-0.000102451
									5.72946	-0.00010683
									5.7356	-0.000107941
									5.74175	-0.000109051
									5.74789	-0.000113654
									5.75403	-0.000123724
									5.76018	-0.00012577
									5.76632	-0.000122686
									5.77246	-0.000107285
									5.77861	-9.95266e-05
									5.78475	-9.70623e-05
									5.79089	-9.45981e-05
									5.79704	-9.27609e-05
									5.80318	-8.15553e-05
									5.80933	-7.4072e-05
									5.81547	-7.10148e-05
									5.82161	-7.00327e-05
									5.82776	-6.90506e-05
									5.8339	-6.10898e-05
									5.84004	-4.32147e-05
									5.84619	-1.39423e-05
									5.85233	5.81486e-06
									5.85847	7.07237e-06
									5.86462	1.70317e-05
									5.87076	2.29777e-05
									5.8769	3.32516e-05
									5.88305	3.34163e-05
									5.88919	3.33092e-05
									5.89534	3.3202e-05
									5.90148	3.80903e-05
									5.90762	3.96799e-05
									5.91377	5.39031e-05
									5.91991	6.23439e-05
									5.92605	6.22928e-05
									5.9322	6.09171e-05
									5.93834	5.95414e-05
									5.94448	6.13499e-05
									5.95063	6.08474e-05
									5.95677	6.03448e-05
									5.96291	5.05791e-05
									5.96906	4.73726e-05
									5.9752	4.68828e-05
									5.98135	5.8861e-05
									5.98749	6.93725e-05
									5.99363	6.96125e-05
									5.99978	6.94161e-05
									6.00592	6.92198e-05
									6.01206	6.96261e-05
									6.01821	6.94099e-05
									6.02435	6.41517e-05
									6.03049	5.88934e-05
									6.03664	4.7467e-05
									6.04278	5.24352e-05
									6.04893	6.2691e-05
									6.05507	7.33449e-05
									6.06121	8.49874e-05
									6.06736	8.54375e-05
									6.0735	8.78553e-05
									6.07964	8.96663e-05
									6.08579	8.90003e-05
									6.09193	8.83342e-05
									6.09807	8.44652e-05
									6.10422	6.46839e-05
									6.11036	5.5358e-05
									6.1165	5.73871e-05
									6.12265	6.98856e-05
									6.12879	7.71543e-05
									6.13494	7.86525e-05
									6.14108	8.01506e-05
									6.14722	8.05655e-05
									6.15337	7.93321e-05
									6.15951	7.80986e-05
									6.16565	6.29561e-05
									6.1718	5.12831e-05
									6.17794	4.93632e-05
									6.18408	4.74434e-05
									6.19023	4.7984e-05
									6.19637	5.70269e-05
									6.20251	6.11255e-05
									6.20866	5.77451e-05
									6.2148	5.43648e-05
									6.22095	5.74079e-05
									6.22709	5.39607e-05
									6.23323	5.05135e-05
									6.23938	4.28584e-05
									6.24552	3.25604e-05
									6.25166	3.19231e-05
									6.25781	3.12857e-05
									6.26395	3.6209e-05
									6.27009	5.0182e-05
									6.27624	5.21935e-05
									6.28238	5.24199e-05
									6.28852	5.26463e-05
									6.29467	5.88109e-05
									6.30081	5.48512e-05
									6.30696	5.08914e-05
									6.3131	4.0378e-05
									6.31924	4.06137e-05
									6.32539	5.55273e-05
									6.33153	6.26958e-05
									6.33767	7.68679e-05
									6.34382	7.89646e-05
									6.34996	7.95047e-05
									6.3561	7.92742e-05
									6.36225	7.90438e-05
									6.36839	8.11329e-05
									6.37453	7.95246e-05
									6.38068	7.79163e-05
									6.38682	6.24524e-05
									6.39297	6.53625e-05
									6.39911	5.8471e-05
									6.40525	5.15796e-05
									6.4114	2.73134e-05
									6.41754	2.95684e-05
									6.42368	6.71861e-05
									6.42983	0.000104804
									6.43597	0.00010568
									6.44211	0.000105703
									6.44826	9.79732e-05
									6.4544	9.02434e-05
									6.46054	8.44739e-05
									6.46669	8.5382e-05
									6.47283	9.09663e-05
									6.47898	9.77e-05
									6.48512	0.000100921
									6.49126	0.000101366
									6.49741	9.88774e-05
									6.50355	9.63886e-05
									6.50969	9.10102e-05
									6.51584	8.01896e-05
									6.52198	6.26127e-05
									6.52812	4.64837e-05
									6.53427	3.92299e-05
									6.54041	3.97555e-05
									6.54655	5.07129e-05
									6.5527	5.14516e-05
									6.55884	5.11195e-05
									6.56499	5.07874e-05
									6.57113	5.0563e-05
									6.57727	4.81865e-05
									6.58342	4.581e-05
									6.58956	3.93753e-05
									6.5957	2.77391e-05
									6.60185	2.75015e-05
									6.60799	2.72639e-05
									6.61413	3.54291e-05
									6.62028	4.04479e-05
									6.62642	4.00049e-05
									6.63256	3.95619e-05
									6.63871	3.78913e-05
									6.64485	3.41677e-05
									6.651	3.04441e-05
									6.65714	2.22607e-05
									6.66328	1.70289e-06
									6.66943	-5.59864e-06
									6.67557	-8.38641e-06
									6.68171	-6.79756e-06
									6.68786	-4.98554e-06
									6.694	-7.57335e-06
									6.70014	-1.01612e-05
									6.70629	-1.24874e-05
									6.71243	-1.18054e-05
									6.71858	-1.52024e-05
									6.72472	-1.85994e-05
									6.73086	-2.73591e-05
									6.73701	-3.65516e-05
									6.74315	-3.71289e-05
									6.74929	-3.69987e-05
									6.75544	-2.33453e-05
									6.76158	-4.90802e-06
									6.76772	-3.50551e-06
									6.77387	-3.08068e-06
									6.78001	-3.10921e-06
									6.78615	-3.13775e-06
									6.7923	-8.84973e-06
									6.79844	-1.45617e-05
									6.80459	-2.65848e-05
									6.81073	-3.65381e-05
									6.81687	-3.84525e-05
									6.82302	-3.18174e-05
									6.82916	-2.71192e-05
									6.8353	-2.7805e-05
									6.84145	-2.84908e-05
									6.84759	-3.13751e-05
									6.85373	-3.8561e-05
									6.85988	-4.12009e-05
									6.86602	-4.44514e-05
									6.87216	-5.2856e-05
									6.87831	-6.19341e-05
									6.88445	-6.71144e-05
									6.8906	-6.48031e-05
									6.89674	-5.76777e-05
									6.90288	-5.54734e-05
									6.90903	-5.32691e-05
									6.91517	-5.17179e-05
									6.92131	-5.01668e-05
									6.92746	-4.90092e-05
									6.9336	-5.04528e-05
									6.93974	-5.18963e-05
									6.94589	-6.33726e-05
									6.95203	-6.37276e-05
									6.95817	-5.65607e-05
									6.96432	-4.35193e-05
									6.97046	-3.69281e-05
									6.97661	-3.67851e-05
									6.98275	-3.69157e-05
									6.98889	-3.70464e-05
									6.99504	-3.69693e-05
									7.00118	-3.81442e-05
									7.00732	-3.93192e-05
									7.01347	-5.6049e-05
									7.01961	-6.18536e-05
									7.02575	-5.29356e-05
									7.0319	-4.24267e-05
									7.03804	-2.81608e-05
									7.04418	-1.19774e-05
									7.05033	-3.47634e-06
									7.05647	6.48592e-06
									7.06262	1.29842e-05
									7.06876	2.83165e-05
									7.0749	2.80149e-05
									7.08105	2.77133e-05
									7.08719	2.42603e-05
									7.09333	2.19656e-05
									7.09948	2.19933e-05
									7.10562	3.81194e-05
									7.11176	5.14411e-05
									7.11791	5.22923e-05
									7.12405	5.83408e-05
									7.13019	5.89916e-05
									7.13634	5.72331e-05
									7.14248	5.54745e-05
									7.14863	5.13066e-05
									7.15477	3.30312e-05
									7.16091	2.63703e-05
									7.16706	2.62656e-05
									7.1732	2.72239e-05
									7.17934	2.69579e-05
									7.18549	2.66918e-05
									7.19163	2.34966e-05
									7.19777	9.31758e-06
									7.20392	-1.12871e-06
									7.21006	-1.77247e-06
									7.2162	-2.41624e-06
									7.22235	-6.93663e-06
									7.22849	-2.90934e-05
									7.23464	-2.50782e-05
									7.24078	-1.43177e-05
									7.24692	-1.32162e-05
									7.25307	-1.43049e-05
									7.25921	-1.53936e-05
									7.26535	-3.79561e-06
									7.2715	-1.08243e-06
									7.27764	-1.96322e-07
									7.28378	-1.86464e-06
									7.28993	-3.53296e-06
									7.29607	-7.7557e-06
									7.30221	-1.26623e-05
									7.30836	-1.06057e-05
									7.3145	3.27549e-07
									7.32065	7.00464e-06
									7.32679	7.86804e-06
									7.33293	7.75043e-06
									7.33908	7.63281e-06
									7.34522	8.71743e-06
									7.35136	7.38591e-06
									7.35751	6.05438e-06
									7.36365	3.13482e-06
									7.36979	5.19338e-07
									7.37594	-2.09614e-06
									7.38208	-6.85206e-07
									7.38823	2.13729e-05
									7.39437	2.50944e-05
									7.40051	2.88158e-05
									7.40666	3.03015e-05
									7.4128	4.06675e-05
									7.41894	4.25576e-05
									7.42509	4.02714e-05
									7.43123	3.79852e-05
									7.43737	2.55653e-05
									7.44352	2.48048e-05
									7.44966	2.40442e-05
									7.4558	2.5029e-05
									7.46195	3.51779e-05
									7.46809	3.92237e-05
									7.47424	3.80784e-05
									7.48038	3.69331e-05
									7.48652	3.81331e-05
									7.49267	3.48865e-05
									7.49881	3.16399e-05
									7.50495	1.47201e-05
									7.5111	5.89173e-06
									7.51724	6.48263e-06
									7.52338	6.04885e-06
									7.52953	5.61507e-06
									7.53567	4.17666e-06
									7.54181	-4.8503e-06
									7.54796	-1.90253e-05
									7.5541	-2.50121e-05
									7.56025	-2.86743e-05
									7.56639	-3.23364e-05
									7.57253	-5.79991e-05
									7.57868	-8.37013e-05
									7.58482	-8.6384e-05
									7.59096	-8.58917e-05
									7.59711	-8.26612e-05
									7.60325	-8.09362e-05
									7.60939	-7.94435e-05
									7.61554	-7.96392e-05
									7.62168	-8.15004e-05
									7.62782	-8.33615e-05
									7.63397	-8.56262e-05
									7.64011	-8.78908e-05
									7.64626	-0.000103772
									7.6524	-0.000106612
									7.65854	-0.00010657
									7.66469	-9.16516e-05
									7.67083	-7.44427e-05
									7.67697	-7.43356e-05
									7.68312	-6.61561e-05
									7.68926	-5.8561e-05
									7.6954	-5.76842e-05
									7.70155	-5.66665e-05
									7.70769	-5.76438e-05
									7.71383	-5.86211e-05
									7.71998	-6.48185e-05
									7.72612	-6.75778e-05
									7.73227	-5.7875e-05
									7.73841	-3.71655e-05
									7.74455	-3.57677e-05
									7.7507	-3.66085e-05
									7.75684	-3.74492e-05
									7.76298	-3.60987e-05
									7.76913	-3.15807e-05
									7.77527	-3.27335e-05
									7.78141	-3.38863e-05
									7.78756	-3.61545e-05
									7.7937	-4.62848e-05
									7.79984	-4.80159e-05
									7.80599	-2.82369e-05
									7.81213	-5.38641e-06
									7.81828	-2.99395e-06
									7.82442	-6.01496e-07
									7.83056	9.55052e-06
									7.83671	2.26339e-05
									7.84285	2.23519e-05
									7.84899	2.20698e-05
									7.85514	2.01682e-05
									7.86128	2.57984e-05
									7.86742	2.9032e-05
									7.87357	3.27174e-05
									7.87971	4.97263e-05
									7.88585	6.53787e-05
									7.892	6.57574e-05
									7.89814	6.61361e-05
									7.90429	7.07457e-05
									7.91043	7.5984e-05
									7.91657	7.55093e-05
									7.92272	7.50347e-05
									7.92886	7.35591e-05
									7.935	8.43463e-05
									7.94115	9.60087e-05
									7.94729	0.000115955
									7.95343	0.000134884
									7.95958	0.000147363
									7.96572	0.000163128
									7.97186	0.000171388
									7.97801	0.00018237
									7.98415	0.000203858
									7.9903	0.000206052
									7.99644	0.000208247
									8.00258	0.000212646
									8.00873	0.000225589
									8.01487	0.000244775
									8.02101	0.000265701
									8.02716	0.000278017
									8.0333	0.000282496
									8.03944	0.000289451
									8.04559	0.000294468
									8.05173	0.000301042
									8.05788	0.000303345
									8.06402	0.000305649
									8.07016	0.000306573
									8.07631	0.000306764
									8.08245	0.000306955
									8.08859	0.000332009
									8.09474	0.000336345
									8.10088	0.000340682
									8.10702	0.000353763
									8.11317	0.000362135
									8.11931	0.00037735
									8.12545	0.000390918
									8.1316	0.000393052
									8.13774	0.000392943
									8.14389	0.000399497
									8.15003	0.000410781
									8.15617	0.000424787
									8.16232	0.000437898
									8.16846	0.00044664
									8.1746	0.000455328
									8.18075	0.000458038
									8.18689	0.000467984
									8.19303	0.000474372
									8.19918	0.000476739
									8.20532	0.000479107
									8.21146	0.000481193
									8.21761	0.000483853
									8.22375	0.000493747
									8.2299	0.000506132
									8.23604	0.000520629
									8.24218	0.000526502
									8.24833	0.000527008
									8.25447	0.000527515
									8.26061	0.000528693
									8.26676	0.000527538
									8.2729	0.000526383
									8.27904	0.000519917
									8.28519	0.000530698
									8.29133	0.000537524
									8.29747	0.000547275
									8.30362	0.000560884
									8.30976	0.000560394
									8.31591	0.000559904
									8.32205	0.000556585
									8.32819	0.000560304
									8.33434	0.000561066
									8.34048	0.000555529
									8.34662	0.000549993
									8.35277	0.0005512
									8.35891	0.000555874
									8.36505	0.000558619
									8.3712	0.000572752
									8.37734	0.000582079
									8.38348	0.000594365
									8.38963	0.000598056
									8.39577	0.000601747
									8.40192	0.000603186
									8.40806	0.000603746
									8.4142	0.000599208
									8.42035	0.000594671
									8.42649	0.000599577
									8.43263	0.00061626
									8.43878	0.000638762
									8.44492	0.000656872
									8.45106	0.000669787
									8.45721	0.000686497
									8.46335	0.000698855
									8.46949	0.000714226
									8.47564	0.000733297
									8.48178	0.000746271
									8.48793	0.000747581
									8.49407	0.000751791
									8.50021	0.000769535
									8.50636	0.000794559
									8.5125	0.000827261
									8.51864	0.000845105
									8.52479	0.000855396
									8.53093	0.000866121
									8.53707	0.000882539
									8.54322	0.000899428
									8.54936	0.000906379
									8.5555	0.000906873
									8.56165	0.00091335
									8.56779	0.000923212
									8.57394	0.000940961
									8.58008	0.000972824
									8.58622	0.00100055
									8.59237	0.00101695
									8.59851	0.00103766
									8.60465	0.00106927
									8.6108	0.00110008
									8.61694	0.00112231
									8.62308	0.00113457
									8.62923	0.00116488
									8.63537	0.00119856
									8.64151	0.00123696
									8.64766	0.00129134
									8.6538	0.00134603
									8.65995	0.00139264
									8.66609	0.00144196
									8.67223	0.00148609
									8.67838	0.00154202
									8.68452	0.00161055
									8.69066	0.00166014
									8.69681	0.00170304
									8.70295	0.00175266
									8.70909	0.00181803
									8.71524	0.00188576
									8.72138	0.00197143
									8.72753	0.00205585
									8.73367	0.00213706
									8.73981	0.00221574
									8.74596	0.00230625
									8.7521	0.00240929
									8.75824	0.00252137
									8.76439	0.00261702
									8.77053	0.00270665
									8.77667	0.00282746
									8.78282	0.00293777
									8.78896	0.00307751
									8.7951	0.00322087
									8.80125	0.00336511
									8.80739	0.00350266
									8.81354	0.00366128
									8.81968	0.00381892
									8.82582	0.00400267
									8.83197	0.00417858
									8.83811	0.00435587
									8.84425	0.00453196
									8.8504	0.0047373
									8.85654	0.00492992
									8.86268	0.00512946
									8.86883	0.00536088
									8.87497	0.00559626
									8.88111	0.00582444
									8.88726	0.0060585
									8.8934	0.0063274
									8.89955	0.00659221
									8.90569	0.006872
									8.91183	0.00712568
									8.91798	0.00741357
									8.92412	0.00768595
									8.93026	0.00796493
									8.93641	0.00828869
									8.94255	0.00861181
									8.94869	0.00892612
									8.95484	0.00925148
									8.96098	0.00960569
									8.96712	0.00994559
									8.97327	0.0103263
									8.97941	0.0106649
									8.98556	0.0110326
									8.9917	0.0113751
									8.99784	0.0117519
									9.00399	0.0121059
									9.01013	0.0124983
									9.01627	0.0128767
									9.02242	0.0132906
									9.02856	0.0136795
									9.0347	0.0141081
									9.04085	0.014523
									9.04699	0.0149502
									9.05313	0.01536
									9.05928	0.015752
									9.06542	0.01617
									9.07157	0.0165932
									9.07771	0.0170036
									9.08385	0.0174171
									9.09	0.0178682
									9.09614	0.0182771
									9.10228	0.0187243
									9.10843	0.0191605
									9.11457	0.0196152
									9.12071	0.0200186
									9.12686	0.0204411
									9.133	0.0208331
									9.13914	0.021234
									9.14529	0.0216313
									9.15143	0.0220327
									9.15758	0.0224519
									9.16372	0.0228389
									9.16986	0.0232605
									9.17601	0.0236514
									9.18215	0.0240743
									9.18829	0.0244348
									9.19444	0.0248124
									9.20058	0.0251659
									9.20672	0.0255243
									9.21287	0.0258547
									9.21901	0.0262343
									9.22515	0.0265803
									9.2313	0.0269386
									9.23744	0.0272675
									9.24359	0.0276134
									9.24973	0.0279453
									9.25587	0.0282525
									9.26202	0.0285567
									9.26816	0.0288558
									9.2743	0.0291418
									9.28045	0.0294004
									9.28659	0.0296818
									9.29273	0.0299417
									9.29888	0.0302171
									9.30502	0.0304693
									9.31116	0.0307285
									9.31731	0.0309631
									9.32345	0.0311964
									9.3296	0.0313965
									9.33574	0.0315941
									9.34188	0.0317803
									9.34803	0.0319575
									9.35417	0.0321449
									9.36031	0.0323112
									9.36646	0.0324854
									9.3726	0.0326381
									9.37874	0.0327996
									9.38489	0.0329525
									9.39103	0.0331007
									9.39718	0.0332226
									9.40332	0.0333398
									9.40946	0.0334449
									9.41561	0.033556
									9.42175	0.0336622
									9.42789	0.0337628
									9.43404	0.0338432
									9.44018	0.03393
									9.44632	0.0340118
									9.45247	0.0340907
									9.45861	0.0341575
									9.46475	0.034202
									9.4709	0.0342441
									9.47704	0.034287
									9.48319	0.0343297
									9.48933	0.0343775
									9.49547	0.0344298
									9.50162	0.0344664
									9.50776	0.0344993
									9.5139	0.0345253
									9.52005	0.0345539
									9.52619	0.0345802
									9.53233	0.0345934
									9.53848	0.0345976
									9.54462	0.0346045
									9.55076	0.0346197
									9.55691	0.0346379
									9.56305	0.0346661
									9.5692	0.0346839
									9.57534	0.0346897
									9.58148	0.0347047
									9.58763	0.0347123
									9.59377	0.0347268
									9.59991	0.0347307
									9.60606	0.0347346
									9.6122	0.0347385
									9.61834	0.0347535
									9.62449	0.034763
									9.63063	0.0347888
									9.63677	0.0348179
									9.64292	0.0348357
									9.64906	0.0348595
									9.65521	0.034891
									9.66135	0.0349235
									9.66749	0.0349653
									9.67364	0.0349987
									9.67978	0.0350248
									9.68592	0.0350647
									9.69207	0.0351197
									9.69821	0.0351854
									9.70435	0.0352618
									9.7105	0.0353343
									9.71664	0.0354022
									9.72278	0.0354867
									9.72893	0.0355735
									9.73507	0.035669
									9.74122	0.0357663
									9.74736	0.035865
									9.7535	0.0359603
									9.75965	0.0360836
									9.76579	0.0362104
									9.77193	0.0363609
									9.77808	0.0365119
									9.78422	0.0366717
									9.79036	0.0368265
									9.79651	0.0370113
									9.80265	0.0371996
									9.80879	0.0374057
									9.81494	0.0376
									9.82108	0.0377942
									9.82723	0.0380127
									9.83337	0.038237
									9.83951	0.0384676
									9.84566	0.0387067
									9.8518	0.0389678
									9.85794	0.0392172
									9.86409	0.0395025
									9.87023	0.0397852
									9.87637	0.0400971
									9.88252	0.0403903
									9.88866	0.0406868
									9.8948	0.0410178
									9.90095	0.0413581
									9.90709	0.0416843
									9.91324	0.0420184
									9.91938	0.0424019
									9.92552	0.0427574
									9.93167	0.0431581
									9.93781	0.0435389
									9.94395	0.0439676
									9.9501	0.0443707
									9.95624	0.0448042
									9.96238	0.0452023
									9.96853	0.0456412
									9.97467	0.0460599
									9.98081	0.046505
									9.98696	0.0469342
									9.9931	0.0474132
									9.99925	0.0478743
									10.0054	0.0483684
									10.0115	0.0488399
									10.0177	0.0493262
									10.0238	0.0498638
									10.03	0.0503437
									10.0361	0.0508643
									10.0423	0.0513441
									10.0484	0.051859
									10.0545	0.0523419
									10.0607	0.0528835
									10.0668	0.0534051
									10.073	0.0539751
									10.0791	0.054496
									10.0853	0.0550294
									10.0914	0.055636
									10.0975	0.0562161
									10.1037	0.0567423
									10.1098	0.0572545
									10.116	0.0578088
									10.1221	0.0583231
									10.1283	0.0589005
									10.1344	0.0594593
									10.1405	0.060172
									10.1467	0.0608419
									10.1528	0.0614653
									10.159	0.0620246
									10.1651	0.0626325
									10.1713	0.0631824
									10.1774	0.0637498
									10.1836	0.064264
									10.1897	0.0648062
									10.1958	0.0653293
									10.202	0.0659746
									10.2081	0.066681
									10.2143	0.0673191
									10.2204	0.0679179
									10.2266	0.0684956
									10.2327	0.0690508
									10.2388	0.0695768
									10.245	0.070132
									10.2511	0.0706441
									10.2573	0.0711701
									10.2634	0.0716678
									10.2696	0.0722113
									10.2757	0.0727331
									10.2819	0.073244
									10.288	0.0738027
									10.2941	0.0743479
									10.3003	0.0748734
									10.3064	0.07538
									10.3126	0.075919
									10.3187	0.0764116
									10.3249	0.0769545
									10.331	0.0775698
									10.3371	0.0782332
									10.3433	0.0787348
									10.3494	0.0792679
									10.3556	0.0797585
									10.3617	0.0802945
									10.3679	0.0808165
									10.374	0.0813727
									10.3801	0.0818574
									10.3863	0.0823651
									10.3924	0.0828435
									10.3986	0.0833358
									10.4047	0.0838162
									10.4109	0.0843021
									10.417	0.0848348
									10.4232	0.0853701
									10.4293	0.0858736
									10.4354	0.0863756
									10.4416	0.0869481
									10.4477	0.0874554
									10.4539	0.0879736
									10.46	0.0884739
									10.4662	0.0889953
									10.4723	0.0894917
									10.4784	0.0899956
									10.4846	0.0905642
									10.4907	0.0911298
									10.4969	0.0916623
									10.503	0.0921969
									10.5092	0.0928058
									10.5153	0.0933704
									10.5214	0.0939723
									10.5276	0.0945191
									10.5337	0.0951132
									10.5399	0.0956533
									10.546	0.0962608
									10.5522	0.0968401
									10.5583	0.0974771
									10.5645	0.0980996
									10.5706	0.0987717
									10.5767	0.0994115
									10.5829	0.100127
									10.589	0.100796
									10.5952	0.101479
									10.6013	0.102127
									10.6075	0.102758
									10.6136	0.103455
									10.6197	0.104177
									10.6259	0.104878
									10.632	0.105586
									10.6382	0.10637
									10.6443	0.107099
									10.6505	0.107922
									10.6566	0.108707
									10.6628	0.109527
									10.6689	0.110286
									10.675	0.111036
									10.6812	0.111848
									10.6873	0.112684
									10.6935	0.113667
									10.6996	0.114645
									10.7058	0.115574
									10.7119	0.11643
									10.718	0.117396
									10.7242	0.118315
									10.7303	0.119293
									10.7365	0.120184
									10.7426	0.121157
									10.7488	0.122021
									10.7549	0.122966
									10.761	0.123918
									10.7672	0.124968
									10.7733	0.125944
									10.7795	0.127002
									10.7856	0.128027
									10.7918	0.129151
									10.7979	0.130202
									10.8041	0.131243
									10.8102	0.132352
									10.8163	0.133359
									10.8225	0.134423
									10.8286	0.135488
									10.8348	0.136652
									10.8409	0.137763
									10.8471	0.138948
									10.8532	0.140068
									10.8593	0.141295
									10.8655	0.142501
									10.8716	0.14364
									10.8778	0.144845
									10.8839	0.146019
									10.8901	0.147101
									10.8962	0.148179
									10.9024	0.149388
									10.9085	0.150553
									10.9146	0.151809
									10.9208	0.152954
									10.9269	0.154191
									10.9331	0.155401
									10.9392	0.156663
									10.9454	0.157799
									10.9515	0.158971
									10.9576	0.160068
									10.9638	0.161192
									10.9699	0.162295
									10.9761	0.163483
									10.9822	0.164613
									10.9884	0.165802
									10.9945	0.16688
									11.0006	0.168001
									11.0068	0.169209
									11.0129	0.170261
									11.0191	0.171351
									11.0252	0.172334
									11.0314	0.173331
									11.0375	0.17429
									11.0437	0.175233
									11.0498	0.176261
									11.0559	0.177667
									11.0621	0.178971
									11.0682	0.179852
									11.0744	0.180823
									11.0805	0.18167
									11.0867	0.182528
									11.0928	0.183272
									11.0989	0.184141
									11.1051	0.184949
									11.1112	0.18572
									11.1174	0.186393
									11.1235	0.187084
									11.1297	0.187697
									11.1358	0.188317
									11.142	0.188874
									11.1481	0.189389
									11.1542	0.189895
									11.1604	0.190352
									11.1665	0.190737
									11.1727	0.191081
									11.1788	0.191446
									11.185	0.191751
									11.1911	0.192045
									11.1972	0.192287
									11.2034	0.192516
									11.2095	0.192686
									11.2157	0.192804
									11.2218	0.19287
									11.228	0.192892
									11.2341	0.192901
									11.2402	0.192885
									11.2464	0.19287
									11.2525	0.192789
									11.2587	0.192674
									11.2648	0.192519
									11.271	0.192314
									11.2771	0.192087
									11.2833	0.191782
									11.2894	0.191452
									11.2955	0.191071
									11.3017	0.190707
									11.3078	0.190298
									11.314	0.189917
									11.3201	0.189461
									11.3263	0.188972
									11.3324	0.188422
									11.3385	0.187871
									11.3447	0.187296
									11.3508	0.186627
									11.357	0.185897
									11.3631	0.185196
									11.3693	0.184376
									11.3754	0.183479
									11.3816	0.182805
									11.3877	0.182064
									11.3938	0.181281
									11.4	0.180406
									11.4061	0.179582
									11.4123	0.178521
									11.4184	0.177239
									11.4246	0.175971
									11.4307	0.17498
									11.4368	0.174048
									11.443	0.173034
									11.4491	0.172048
									11.4553	0.171146
									11.4614	0.170189
									11.4676	0.169074
									11.4737	0.168035
									11.4798	0.16689
									11.486	0.165834
									11.4921	0.164626
									11.4983	0.163448
									11.5044	0.162212
									11.5106	0.16111
									11.5167	0.159947
									11.5229	0.158895
									11.529	0.157739
									11.5351	0.156602
									11.5413	0.155361
									11.5474	0.154173
									11.5536	0.152917
									11.5597	0.151688
									11.5659	0.150407
									11.572	0.149025
									11.5781	0.147814
									11.5843	0.146528
									11.5904	0.145391
									11.5966	0.144174
									11.6027	0.142986
									11.6089	0.141677
									11.615	0.140422
									11.6212	0.139069
									11.6273	0.137839
									11.6334	0.136564
									11.6396	0.135124
									11.6457	0.133773
									11.6519	0.132536
									11.658	0.131354
									11.6642	0.130114
									11.6703	0.128948
									11.6764	0.127616
									11.6826	0.12639
									11.6887	0.125035
									11.6949	0.12381
									11.701	0.122451
									11.7072	0.121142
									11.7133	0.119778
									11.7194	0.118542
									11.7256	0.117266
									11.7317	0.116147
									11.7379	0.114961
									11.744	0.113642
									11.7502	0.112177
									11.7563	0.110913
									11.7625	0.109721
									11.7686	0.108418
									11.7747	0.107173
									11.7809	0.105817
									11.787	0.104628
									11.7932	0.103384
									11.7993	0.102284
									11.8055	0.10116
									11.8116	0.100039
									11.8177	0.0988013
									11.8239	0.0976369
									11.83	0.0965102
									11.8362	0.095296
									11.8423	0.0940461
									11.8485	0.0928327
									11.8546	0.0916933
									11.8607	0.0904992
									11.8669	0.0894455
									11.873	0.0883689
									11.8792	0.0873837
									11.8853	0.0862499
									11.8915	0.0851888
									11.8976	0.0840352
									11.9038	0.0829975
									11.9099	0.0818812
									11.916	0.0807669
									11.9222	0.0796034
									11.9283	0.0786091
									11.9345	0.0774439
									11.9406	0.0763509
									11.9468	0.0753684
									11.9529	0.0744183
									11.959	0.0734536
									11.9652	0.072414
									11.9713	0.0714699
									11.9775	0.0704719
									11.9836	0.0695104
									11.9898	0.0684385
									11.9959	0.0674768
									12.0021	0.0663681
									12.0082	0.0653845
									12.0143	0.0645281
									12.0205	0.0637035
									12.0266	0.0628645
									12.0328	0.0619467
									12.0389	0.0610094
									12.0451	0.0600198
									12.0512	0.0590692
									12.0573	0.0581338
									12.0635	0.0572816
									12.0696	0.056424
									12.0758	0.0556696
									12.0819	0.054915
									12.0881	0.0542108
									12.0942	0.0534253
									12.1003	0.0526752
									12.1065	0.0518944
									12.1126	0.0511558
									12.1188	0.0503827
									12.1249	0.0496267
									12.1311	0.048827
									12.1372	0.0481113
									12.1434	0.0474026
									12.1495	0.0467738
									12.1556	0.0461776
									12.1618	0.0455104
									12.1679	0.0448722
									12.1741	0.0441963
									12.1802	0.0435658
									12.1864	0.0429209
									12.1925	0.0422874
									12.1986	0.0416089
									12.2048	0.0409972
									12.2109	0.0403805
									12.2171	0.0398271
									12.2232	0.0393281
									12.2294	0.0387981
									12.2355	0.038269
									12.2417	0.0376813
									12.2478	0.0371515
									12.2539	0.0366061
									12.2601	0.0360898
									12.2662	0.0355105
									12.2724	0.034989
									12.2785	0.0344666
									12.2847	0.0339891
									12.2908	0.0335292
									12.2969	0.0331252
									12.3031	0.0327037
									12.3092	0.0322201
									12.3154	0.0317483
									12.3215	0.0313149
									12.3277	0.0309074
									12.3338	0.0304395
									12.3399	0.0299688
									12.3461	0.0295664
									12.3522	0.0291825
									12.3584	0.0287868
									12.3645	0.0284579
									12.3707	0.0281149
									12.3768	0.0277587
									12.383	0.0273797
									12.3891	0.0270238
									12.3952	0.026687
									12.4014	0.0263254
									12.4075	0.0259411
									12.4137	0.0255733
									12.4198	0.0252554
									12.426	0.0249351
									12.4321	0.0246498
									12.4382	0.0243911
									12.4444	0.0241203
									12.4505	0.02381
									12.4567	0.0235293
									12.4628	0.023237
									12.469	0.0229799
									12.4751	0.0227001
									12.4813	0.0224141
									12.4874	0.0221234
									12.4935	0.0218748
									12.4997	0.021656
									12.5058	0.0214467
									12.512	0.0212346
									12.5181	0.0210133
									12.5243	0.020795
									12.5304	0.0205519
									12.5365	0.0203447
									12.5427	0.0201254
									12.5488	0.0199028
									12.555	0.0196647
									12.5611	0.0194586
									12.5673	0.0192663
									12.5734	0.0191076
									12.5795	0.0189496
									12.5857	0.0187769
									12.5918	0.0186014
									12.598	0.0184161
									12.6041	0.0182382
									12.6103	0.0180762
									12.6164	0.0179015
									12.6226	0.0177098
									12.6287	0.0175524
									12.6348	0.0173925
									12.641	0.0172637
									12.6471	0.0171475
									12.6533	0.0170284
									12.6594	0.0168791
									12.6656	0.0167377
									12.6717	0.0165909
									12.6778	0.0164645
									12.684	0.0163213
									12.6901	0.0161695
									12.6963	0.0160416
									12.7024	0.0159152
									12.7086	0.0157867
									12.7147	0.0156883
									12.7209	0.0156015
									12.727	0.0154914
									12.7331	0.0153825
									12.7393	0.0152548
									12.7454	0.0151542
									12.7516	0.0150616
									12.7577	0.0149551
									12.7639	0.0148313
									12.77	0.0147316
									12.7761	0.0146444
									12.7823	0.0145733
									12.7884	0.0145072
									12.7946	0.0144258
									12.8007	0.0143415
									12.8069	0.0142561
									12.813	0.0141743
									12.8191	0.0141003
									12.8253	0.0140259
									12.8314	0.0139241
									12.8376	0.0138372
									12.8437	0.0137638
									12.8499	0.0137026
									12.856	0.0136432
									12.8622	0.0135962
									12.8683	0.0135405
									12.8744	0.013474
									12.8806	0.0133991
									12.8867	0.0133318
									12.8929	0.0132746
									12.899	0.0132076
									12.9052	0.0131248
									12.9113	0.013069
									12.9174	0.0130192
									12.9236	0.0129716
									12.9297	0.0129398
									12.9359	0.0128895
									12.942	0.0128369
									12.9482	0.0127753
									12.9543	0.0127159
									12.9605	0.0126635
									12.9666	0.0126144
									12.9727	0.0125468
									12.9789	0.0124904
									12.985	0.012446
									12.9912	0.0124089
									12.9973	0.0123833
									13.0035	0.0123497
									13.0096	0.012309
									13.0157	0.0122711
									13.0219	0.0122388
									13.028	0.0122087
									13.0342	0.0121782
									13.0403	0.0121239
									13.0465	0.0120741
									13.0526	0.0120301
									13.0587	0.0120056
									13.0649	0.0119915
									13.071	0.01198
									13.0772	0.011958
									13.0833	0.0119278
									13.0895	0.0119054
									13.0956	0.0118801
									13.1018	0.0118529
									13.1079	0.0118227
									13.114	0.0117859
									13.1202	0.0117512
									13.1263	0.0117242
									13.1325	0.0117099
									13.1386	0.0117011
									13.1448	0.0116924
									13.1509	0.0116668
									13.157	0.0116353
									13.1632	0.0115962
									13.1693	0.0115764
									13.1755	0.0115449
									13.1816	0.0114932
									13.1878	0.0114511
									13.1939	0.0114272
									13.2	0.0114054
									13.2062	0.0113844
									13.2123	0.0113681
									13.2185	0.0113568
									13.2246	0.0113342
									13.2308	0.0112955
									13.2369	0.011265
									13.2431	0.0112558
									13.2492	0.0112284
									13.2553	0.0111931
									13.2615	0.0111766
									13.2676	0.011167
									13.2738	0.0111499
									13.2799	0.0111436
									13.2861	0.0111345
									13.2922	0.0111168
									13.2983	0.0110974
									13.3045	0.0110804
									13.3106	0.0110721
									13.3168	0.0110595
									13.3229	0.011038
									13.3291	0.0110171
									13.3352	0.0110125
									13.3414	0.0110193
									13.3475	0.0110241
									13.3536	0.0110235
									13.3598	0.0110228
									13.3659	0.0110215
									13.3721	0.0110122
									13.3782	0.0110084
									13.3844	0.0110046
									13.3905	0.0109956
									13.3966	0.010976
									13.4028	0.0109583
									13.4089	0.0109483
									13.4151	0.010954
									13.4212	0.0109553
									13.4274	0.0109491
									13.4335	0.0109429
									13.4396	0.0109406
									13.4458	0.0109383
									13.4519	0.0109329
									13.4581	0.0109242
									13.4642	0.0109092
									13.4704	0.0108985
									13.4765	0.0108893
									13.4827	0.0108946
									13.4888	0.010911
									13.4949	0.0109152
									13.5011	0.0109163
									13.5072	0.0109138
									13.5134	0.0109114
									13.5195	0.0109106
									13.5257	0.0109098
									13.5318	0.0109011
									13.5379	0.0108902
									13.5441	0.0108966
									13.5502	0.0109061
									13.5564	0.0109185
									13.5625	0.0109445
									13.5687	0.0109494
									13.5748	0.0109543
									13.581	0.0109579
									13.5871	0.0109673
									13.5932	0.0109713
									13.5994	0.0109652
									13.6055	0.0109591
									13.6117	0.0109566
									13.6178	0.0109686
									13.624	0.0109848
									13.6301	0.0110036
									13.6362	0.0110082
									13.6424	0.0110091
									13.6485	0.0110082
									13.6547	0.0110072
									13.6608	0.0110111
									13.667	0.0110115
									13.6731	0.0110052
									13.6792	0.0109989
									13.6854	0.0110045
									13.6915	0.0110137
									13.6977	0.0110231
									13.7038	0.0110396
									13.71	0.0110454
									13.7161	0.0110473
									13.7223	0.0110463
									13.7284	0.0110454
									13.7345	0.0110441
									13.7407	0.0110428
									13.7468	0.0110381
									13.753	0.011026
									13.7591	0.0110251
									13.7653	0.0110402
									13.7714	0.0110565
									13.7775	0.0110638
									13.7837	0.0110672
									13.7898	0.0110707
									13.796	0.011072
									13.8021	0.0110731
									13.8083	0.0110727
									13.8144	0.0110723
									13.8206	0.0110706
									13.8267	0.0110673
									13.8328	0.011065
									13.839	0.0110876
									13.8451	0.0111013
									13.8513	0.0111025
									13.8574	0.0111074
									13.8636	0.0111076
									13.8697	0.0111078
									13.8758	0.0111085
									13.882	0.0111076
									13.8881	0.0111067
									13.8943	0.0111035
									13.9004	0.011108
									13.9066	0.011132
									13.9127	0.0111551
									13.9188	0.0111645
									13.925	0.0111721
									13.9311	0.0111833
									13.9373	0.0111968
									13.9434	0.0112188
									13.9496	0.0112202
									13.9557	0.0112216
									13.9619	0.0112228
									13.968	0.0112289
									13.9741	0.0112371
									13.9803	0.0112737
									13.9864	0.0113067
									13.9926	0.0113105
									13.9987	0.0113152
									14.0049	0.0113218
									14.011	0.0113367
									14.0171	0.0113409
									14.0233	0.0113425
									14.0294	0.0113442
									14.0356	0.0113633
									14.0417	0.01138
									14.0479	0.0114018
									14.054	0.0114241
									14.0602	0.0114373
									14.0663	0.0114389
									14.0724	0.0114405
									14.0786	0.0114516
									14.0847	0.0114606
									14.0909	0.0114627
									14.097	0.0114648
									14.1032	0.0114651
									14.1093	0.011479
[truncated: 1,467 more rows]

## Sheet: SEC-MALS QT3-OD
volume (mL)	Molar Mass 1	volume (mL)	Molar Mass 2	volume (mL)	Molar Mass 3		volume (mL)	RI
16.1549	23830.9	10.6176	89102	9.73356	139231		3.65319	-0.000177752
16.1608	23830.1	10.6236	88820.1	9.73953	139478		3.65933	-0.00017767
16.1668	23769.5	10.6296	88553.8	9.7455	138739		3.66548	-0.000179461
16.1728	23735.3	10.6355	88429	9.75148	137911		3.67162	-0.000180967
16.1787	23684	10.6415	88264.7	9.75745	137159		3.67776	-0.000182473
16.1847	23677.9	10.6475	88105.2	9.76342	136494		3.68391	-0.000187386
16.1907	23660.2	10.6534	88012.9	9.7694	135863		3.69005	-0.000210719
16.1967	23635.5	10.6594	87918.5	9.77537	135152		3.69619	-0.000217397
16.2026	23588.1	10.6654	87739.7	9.78134	134461		3.70234	-0.000221943
16.2086	23551.1	10.6714	87514.7	9.78732	133854		3.70848	-0.000214218
16.2146	23513.6	10.6773	87317.9	9.79329	133404		3.71463	-0.000194792
16.2206	23453.7	10.6833	87083.5	9.79926	132901		3.72077	-0.000193563
16.2265	23390.7	10.6893	86883.9	9.80524	132211		3.72691	-0.000187517
16.2325	23343.6	10.6953	86573.2	9.81121	131637		3.73306	-0.000186811
16.2385	23311.1	10.7012	86388.4	9.81718	131152		3.7392	-0.000187179
16.2445	23259.6	10.7072	86269.8	9.82316	130811		3.74534	-0.000187546
16.2504	23209.2	10.7132	86079.6	9.82913	130368		3.75149	-0.000188987
16.2564	23174.1	10.7192	85949.4	9.8351	129774		3.75763	-0.000212212
16.2624	23138.9	10.7251	85890.2	9.84108	129013		3.76377	-0.000228066
16.2683	23108.3	10.7311	85782.9	9.84705	128481		3.76992	-0.000218923
16.2743	23068.1	10.7371	85548.4	9.85302	127989		3.77606	-0.000217772
16.2803	23032.2	10.743	85399.3	9.859	127578		3.7822	-0.00021662
16.2863	22980.6	10.749	85134.5	9.86497	127240		3.78835	-0.000211677
16.2922	22918.9	10.755	85034.7	9.87094	126981		3.79449	-0.000211094
16.2982	22869.8	10.761	84825.3	9.87692	126574		3.80064	-0.000210511
16.3042	22821.4	10.7669	84709.4	9.88289	125953		3.80678	-0.000227877
16.3102	22768.5	10.7729	84530.6	9.88886	125530		3.81292	-0.000228716
16.3161	22711.6	10.7789	84453.6	9.89484	125338		3.81907	-0.000230492
16.3221	22670.4	10.7849	84317.8	9.90081	125143		3.82521	-0.000260894
16.3281	22626.8	10.7908	84224.8	9.90678	124829		3.83135	-0.000289629
16.3341	22595.5	10.7968	84058.3	9.91276	124499		3.8375	-0.000290528
16.34	22534.6	10.8028	83900.9	9.91873	124111		3.84364	-0.000292344
16.346	22473.1	10.8088	83698.9	9.9247	123749		3.84978	-0.000277288
16.352	22399.3	10.8147	83511.9	9.93068	123394		3.85593	-0.000269386
16.3579	22346.7	10.8207	83325.4	9.93665	123124		3.86207	-0.000268639
16.3639	22290.9	10.8267	83172.9	9.94262	122901		3.86821	-0.000267891
16.3699	22238.5	10.8326	83037.1	9.9486	122712		3.87436	-0.000262011
16.3759	22178.5	10.8386	82862.7	9.95457	122494		3.8805	-0.000260314
16.3818	22132.7	10.8446	82689.4	9.96054	122252		3.88665	-0.000262273
16.3878	22087.1	10.8506	82555.8	9.96652	121988		3.89279	-0.000264232
16.3938	22046.1	10.8565	82457.3	9.97249	121775		3.89893	-0.000290982
16.3998	22006.5	10.8625	82335.6	9.97846	121605		3.90508	-0.000313264
16.4057	21970	10.8685	82174.1	9.98444	121416		3.91122	-0.000318124
16.4117	21930	10.8745	81987.2	9.99041	121180		3.91736	-0.000315752
16.4177	21880.2	10.8804	81792.8	9.99638	120942		3.92351	-0.000315093
16.4237	21830.4	10.8864	81621.2	10.0024	120719		3.92965	-0.000315217
16.4296	21780.4	10.8924	81451.3	10.0083	120491		3.93579	-0.000315342
16.4356	21730.1	10.8984	81311.3	10.0143	120206		3.94194	-0.000316176
16.4416	21685.6	10.9043	81167.8	10.0203	119880		3.94808	-0.000333234
16.4475	21643.5	10.9103	81015.1	10.0262	119664		3.95422	-0.000334319
16.4535	21597.8	10.9163	80896	10.0322	119496		3.96037	-0.000335404
16.4595	21549.1	10.9222	80801	10.0382	119302		3.96651	-0.00034306
16.4655	21500.4	10.9282	80696	10.0442	119077		3.97266	-0.00035971
16.4714	21453.2	10.9342	80561	10.0501	118695		3.9788	-0.000372358
16.4774	21400.4	10.9402	80430.9	10.0561	118207		3.98494	-0.000370048
16.4834	21354.2	10.9461	80284.6	10.0621	117719		3.99109	-0.000347482
16.4894	21313.8	10.9521	80139.7	10.0681	117465		3.99723	-0.000333023
16.4953	21268.1	10.9581	79982.8	10.074	117380		4.00337	-0.000331447
16.5013	21216.7	10.9641	79850	10.08	117259		4.00952	-0.000330449
16.5073	21165.2	10.97	79725.7	10.086	117083		4.01566	-0.000329451
16.5133	21119	10.976	79616.7	10.092	116771		4.0218	-0.000325062
16.5192	21075.3	10.982	79525.8	10.0979	116337		4.02795	-0.00032803
16.5252	21040.9	10.988	79410.6	10.1039	115859		4.03409	-0.000330998
16.5312	21003	10.9939	79267.7	10.1099	115388		4.04023	-0.000339615
16.5371	20967.5	10.9999	79132.5	10.1158	114976		4.04638	-0.000345156
16.5431	20920.8	11.0059	78993.2	10.1218	114616		4.05252	-0.000349664
16.5491	20873.5	11.0118	78850.2	10.1278	114218		4.05867	-0.000348842
16.5551	20819.7	11.0178	78731.3	10.1338	114205		4.06481	-0.000332557
16.561	20784.5	11.0238	78615				4.07095	-0.000332833
16.567	20745.9	11.0298	78497.7				4.0771	-0.000333108
16.573	20718.2	11.0357	78392.5				4.08324	-0.000335669
16.579	20673.2	11.0417	78293				4.08938	-0.000327329
16.5849	20644.7	11.0477	78210.8				4.09553	-0.000327535
16.5909	20610.8	11.0537	78126.4				4.10167	-0.000327742
16.5969	20571.1	11.0596	78036.6				4.10781	-0.000335293
16.6029	20519.8	11.0656	77912.1				4.11396	-0.000345381
16.6088	20464.2	11.0716	77756.4				4.1201	-0.000353791
16.6148	20424.4	11.0776	77603.5				4.12624	-0.000346522
16.6208	20389.2	11.0835	77485				4.13239	-0.000320164
16.6267	20350.8	11.0895	77369.7				4.13853	-0.000303721
16.6327	20313.6	11.0955	77241.1				4.14468	-0.000298318
16.6387	20276.7	11.1014	77123.7				4.15082	-0.000296634
16.6447	20227.7	11.1074	77044.8				4.15696	-0.000294949
16.6506	20191.5	11.1134	76976.5				4.16311	-0.000294703
16.6566	20165.1	11.1194	76892.8				4.16925	-0.000294457
16.6626	20134.4	11.1253	76806.9				4.17539	-0.000299175
16.6686	20077.2	11.1313	76721.6				4.18154	-0.000312058
16.6745	19992.1	11.1373	76579.6				4.18768	-0.000325602
16.6805	19926.2	11.1433	76417				4.19382	-0.000332721
16.6865	19895.8	11.1492	76243.9				4.19997	-0.000317458
16.6925	19859	11.1552	76139.8				4.20611	-0.000317226
16.6984	19800.3	11.1612	76017.1				4.21225	-0.000316994
16.7044	19755.7	11.1671	75939				4.2184	-0.000322814
16.7104	19726.2	11.1731	75808.1				4.22454	-0.000329218
16.7163	19677.6	11.1791	75702.6				4.23069	-0.00032885
16.7223	19640	11.1851	75592				4.23683	-0.000328482
16.7283	19601	11.191	75516.5				4.24297	-0.000335121
16.7343	19568.9	11.197	75383.7				4.24912	-0.000366442
16.7402	19506.1	11.203	75278				4.25526	-0.000394571
16.7462	19459.6	11.209	75126.1				4.2614	-0.00040076
16.7522	19386.4	11.2149	74960.4				4.26755	-0.000396459
16.7582	19318.8	11.2209	74804.5				4.27369	-0.000381423
16.7641	19224.3	11.2269	74701.1				4.27983	-0.000379582
		11.2329	74638.6				4.28598	-0.000377741
10.6176	89102	11.2388	74545.8				4.29212	-0.000370187
10.6236	88820.1	11.2448	74436.4				4.29826	-0.000356136
10.6296	88553.8	11.2508	74312				4.30441	-0.000355106
10.6355	88429	11.2567	74219.1				4.31055	-0.000355292
10.6415	88264.7	11.2627	74098.7				4.3167	-0.000355477
10.6475	88105.2	11.2687	73973.8				4.32284	-0.00035875
10.6534	88012.9	11.2747	73855.5				4.32898	-0.000362552
10.6594	87918.5	11.2806	73711.1				4.33513	-0.0003634
10.6654	87739.7	11.2866	73522				4.34127	-0.000327798
10.6714	87514.7	11.2926	73335.9				4.34741	-0.00029616
10.6773	87317.9	11.2986	73244.7				4.35356	-0.000290359
10.6833	87083.5	11.3045	73184				4.3597	-0.000287667
10.6893	86883.9	11.3105	73077.9				4.36584	-0.000284976
10.6953	86573.2	11.3165	72957.9				4.37199	-0.000261762
10.7012	86388.4	11.3225	72855.2				4.37813	-0.000261141
10.7072	86269.8	11.3284	72755.8				4.38427	-0.000260521
10.7132	86079.6	11.3344	72609.1				4.39042	-0.000264057
10.7192	85949.4	11.3404	72485.7				4.39656	-0.000270508
10.7251	85890.2	11.3463	72312.5				4.40271	-0.000275402
10.7311	85782.9	11.3523	72139.2				4.40885	-0.000253095
10.7371	85548.4	11.3583	71948.9				4.41499	-0.000230056
10.743	85399.3	11.3643	71818.4				4.42114	-0.000226941
10.749	85134.5	11.3702	71670.8				4.42728	-0.000220064
10.755	85034.7	11.3762	71577.3				4.43342	-0.000210213
10.761	84825.3	11.3822	71437.2				4.43957	-0.000207441
10.7669	84709.4	11.3882	71329.9				4.44571	-0.000203954
10.7729	84530.6	11.3941	71209.4				4.45185	-0.000204862
10.7789	84453.6	11.4001	71154.4				4.458	-0.000205771
10.7849	84317.8	11.4061	71022.1				4.46414	-0.000223785
10.7908	84224.8	11.4121	70895.9				4.47028	-0.000229725
10.7968	84058.3	11.418	70706.2				4.47643	-0.00021988
10.8028	83900.9	11.424	70480.5				4.48257	-0.000202866
10.8088	83698.9	11.43	70322.8				4.48872	-0.000185311
10.8147	83511.9	11.4359	70191.2				4.49486	-0.000181813
10.8207	83325.4	11.4419	70039.1				4.501	-0.000180147
10.8267	83172.9	11.4479	69892.1				4.50715	-0.000178482
10.8326	83037.1	11.4539	69810.8				4.51329	-0.000161521
10.8386	82862.7	11.4598	69715.2				4.51943	-0.000162957
10.8446	82689.4	11.4658	69667.2				4.52558	-0.000164394
10.8506	82555.8	11.4718	69581.5				4.53172	-0.000172022
10.8565	82457.3	11.4778	69450.4				4.53786	-0.000169174
10.8625	82335.6	11.4837	69285.8				4.54401	-0.000154602
10.8685	82174.1	11.4897	69062.3				4.55015	-0.000134566
10.8745	81987.2	11.4957	68845.2				4.55629	-0.000113432
10.8804	81792.8	11.5017	68695.7				4.56244	-0.00010815
10.8864	81621.2	11.5076	68586.2				4.56858	-0.000102868
10.8924	81451.3	11.5136	68458.1				4.57473	-9.98354e-05
10.8984	81311.3	11.5196	68333.8				4.58087	-9.02542e-05
10.9043	81167.8	11.5255	68250.6				4.58701	-8.60063e-05
10.9103	81015.1	11.5315	67814.6				4.59316	-8.54273e-05
10.9163	80896						4.5993	-8.48483e-05
10.9222	80801						4.60544	-8.6624e-05
10.9282	80696						4.61159	-8.91831e-05
10.9342	80561						4.61773	-8.66851e-05
10.9402	80430.9						4.62387	-6.73679e-05
10.9461	80284.6						4.63002	-5.559e-05
10.9521	80139.7						4.63616	-5.49788e-05
10.9581	79982.8						4.6423	-5.43675e-05
10.9641	79850						4.64845	-5.43513e-05
10.97	79725.7						4.65459	-5.57285e-05
10.976	79616.7						4.66074	-5.71057e-05
10.982	79525.8						4.66688	-6.5404e-05
10.988	79410.6						4.67302	-8.15452e-05
10.9939	79267.7						4.67917	-8.71428e-05
10.9999	79132.5						4.68531	-8.48358e-05
11.0059	78993.2						4.69145	-6.31286e-05
11.0118	78850.2						4.6976	-5.10448e-05
11.0178	78731.3						4.70374	-5.00688e-05
11.0238	78615						4.70988	-4.97847e-05
11.0298	78497.7						4.71603	-4.95007e-05
11.0357	78392.5						4.72217	-3.95524e-05
11.0417	78293						4.72832	-3.98417e-05
11.0477	78210.8						4.73446	-4.01309e-05
11.0537	78126.4						4.7406	-4.39999e-05
11.0596	78036.6						4.74675	-3.81138e-05
11.0656	77912.1						4.75289	-3.02521e-05
11.0716	77756.4						4.75903	-5.6374e-06
11.0776	77603.5						4.76518	2.27713e-05
11.0835	77485						4.77132	2.21132e-05
11.0895	77369.7						4.77746	2.14551e-05
11.0955	77241.1						4.78361	1.76414e-05
11.1014	77123.7						4.78975	2.04112e-05
11.1074	77044.8						4.79589	2.10149e-05
11.1134	76976.5						4.80204	2.16187e-05
11.1194	76892.8						4.80818	1.83644e-05
11.1253	76806.9						4.81433	4.42678e-06
11.1313	76721.6						4.82047	7.21183e-07
11.1373	76579.6						4.82661	8.21043e-06
11.1433	76417						4.83276	2.01851e-05
11.1492	76243.9						4.8389	3.56792e-05
11.1552	76139.8						4.84504	3.52989e-05
11.1612	76017.1						4.85119	3.49187e-05
11.1671	75939						4.85733	3.10249e-05
11.1731	75808.1						4.86347	3.08286e-05
11.1791	75702.6						4.86962	3.06324e-05
11.1851	75592						4.87576	1.9674e-05
11.191	75516.5						4.8819	3.42522e-06
11.197	75383.7						4.88805	-1.18859e-05
11.203	75278						4.89419	-2.28791e-05
11.209	75126.1						4.90034	-2.49658e-05
11.2149	74960.4						4.90648	-9.46761e-06
11.2209	74804.5						4.91262	-8.71693e-06
11.2269	74701.1						4.91877	-9.13502e-06
11.2329	74638.6						4.92491	-9.55311e-06
11.2388	74545.8						4.93105	-2.82893e-06
11.2448	74436.4						4.9372	-4.21544e-06
11.2508	74312						4.94334	-5.60196e-06
11.2567	74219.1						4.94948	-1.44179e-05
11.2627	74098.7						4.95563	-3.3612e-05
11.2687	73973.8						4.96177	-3.29323e-05
11.2747	73855.5						4.96791	-3.22527e-05
11.2806	73711.1						4.97406	-2.64811e-05
11.2866	73522						4.9802	-2.3521e-05
11.2926	73335.9						4.98635	-2.63423e-05
11.2986	73244.7						4.99249	-2.91637e-05
11.3045	73184						4.99863	-4.04029e-05
11.3105	73077.9						5.00478	-4.08575e-05
11.3165	72957.9						5.01092	-5.27636e-05
11.3225	72855.2						5.01706	-6.46696e-05
11.3284	72755.8						5.02321	-8.06299e-05
11.3344	72609.1						5.02935	-8.77218e-05
11.3404	72485.7						5.03549	-9.51025e-05
11.3463	72312.5						5.04164	-8.54649e-05
11.3523	72139.2						5.04778	-7.58819e-05
11.3583	71948.9						5.05392	-7.24932e-05
11.3643	71818.4						5.06007	-7.1259e-05
11.3702	71670.8						5.06621	-7.00248e-05
11.3762	71577.3						5.07236	-6.87218e-05
11.3822	71437.2						5.0785	-6.86091e-05
11.3882	71329.9						5.08464	-6.84963e-05
11.3941	71209.4						5.09079	-9.08774e-05
11.4001	71154.4						5.09693	-0.000103251
11.4061	71022.1						5.10307	-9.59671e-05
11.4121	70895.9						5.10922	-7.68538e-05
11.418	70706.2						5.11536	-7.63177e-05
11.424	70480.5						5.1215	-7.57817e-05
11.43	70322.8						5.12765	-7.57812e-05
11.4359	70191.2						5.13379	-7.03439e-05
11.4419	70039.1						5.13993	-7.07107e-05
11.4479	69892.1						5.14608	-7.10776e-05
11.4539	69810.8						5.15222	-6.94545e-05
11.4598	69715.2						5.15837	-7.09125e-05
11.4658	69667.2						5.16451	-7.23705e-05
11.4718	69581.5						5.17065	-7.75088e-05
11.4778	69450.4						5.1768	-8.42666e-05
11.4837	69285.8						5.18294	-5.83224e-05
11.4897	69062.3						5.18908	-5.42136e-05
11.4957	68845.2						5.19523	-5.40488e-05
11.5017	68695.7						5.20137	-5.3884e-05
11.5076	68586.2						5.20751	-5.17513e-05
11.5136	68458.1						5.21366	-3.92104e-05
11.5196	68333.8						5.2198	-3.91337e-05
11.5255	68250.6						5.22594	-3.90569e-05
11.5315	67814.6						5.23209	-4.58024e-05
							5.23823	-7.04909e-05
9.73356	139231						5.24438	-6.70149e-05
9.73953	139478						5.25052	-5.42827e-05
9.7455	138739						5.25666	-5.4311e-05
9.75148	137911						5.26281	-5.43393e-05
9.75745	137159						5.26895	-5.55971e-05
9.76342	136494						5.27509	-5.6538e-05
9.7694	135863						5.28124	-5.70059e-05
9.77537	135152						5.28738	-5.82265e-05
9.78134	134461						5.29352	-7.8417e-05
9.78732	133854						5.29967	-0.000104065
9.79329	133404						5.30581	-0.000106714
9.79926	132901						5.31195	-0.000111622
9.80524	132211						5.3181	-0.000110968
9.81121	131637						5.32424	-9.04909e-05
9.81718	131152						5.33039	-7.15257e-05
9.82316	130811						5.33653	-6.59493e-05
9.82913	130368						5.34267	-6.20733e-05
9.8351	129774						5.34882	-5.42691e-05
9.84108	129013						5.35496	-3.9415e-05
9.84705	128481						5.3611	-3.80626e-05
9.85302	127989						5.36725	-3.93248e-05
9.859	127578						5.37339	-4.05869e-05
9.86497	127240						5.37953	-2.73405e-05
9.87094	126981						5.38568	-6.38922e-06
9.87692	126574						5.39182	1.70315e-05
9.88289	125953						5.39796	3.85152e-05
9.88886	125530						5.40411	5.47241e-05
9.89484	125338						5.41025	7.6602e-05
9.90081	125143						5.4164	8.01252e-05
9.90678	124829						5.42254	8.36485e-05
9.91276	124499						5.42868	8.46729e-05
9.91873	124111						5.43483	8.37219e-05
9.9247	123749						5.44097	8.27709e-05
9.93068	123394						5.44711	8.41186e-05
9.93665	123124						5.45326	8.54663e-05
9.94262	122901						5.4594	9.65853e-05
9.9486	122712						5.46554	0.000121933
9.95457	122494						5.47169	0.000122057
9.96054	122252						5.47783	0.000122182
9.96652	121988						5.48397	0.000118069
9.97249	121775						5.49012	9.99586e-05
9.97846	121605						5.49626	9.92766e-05
9.98444	121416						5.50241	9.85945e-05
9.99041	121180						5.50855	9.10454e-05
9.99638	120942						5.51469	6.21971e-05
10.0024	120719						5.52084	6.12912e-05
10.0083	120491						5.52698	7.19036e-05
10.0143	120206						5.53312	9.14619e-05
10.0203	119880						5.53927	0.000103831
10.0262	119664						5.54541	0.000109474
10.0322	119496						5.55155	0.000115116
10.0382	119302						5.5577	0.00012554
10.0442	119077						5.56384	0.000137937
10.0501	118695						5.56998	0.000139105
10.0561	118207						5.57613	0.000138729
10.0621	117719						5.58227	0.000138353
10.0681	117465						5.58842	0.000136463
10.074	117380						5.59456	0.00013957
10.08	117259						5.6007	0.000153753
10.086	117083						5.60685	0.000177113
10.092	116771						5.61299	0.000179816
10.0979	116337						5.61913	0.00018089
10.1039	115859						5.62528	0.000181965
10.1099	115388						5.63142	0.000184702
10.1158	114976						5.63756	0.000192564
10.1218	114616						5.64371	0.000192596
10.1278	114218						5.64985	0.000192627
10.1338	114205						5.65599	0.000169004
							5.66214	0.000165765
							5.66828	0.000188546
							5.67443	0.000190867
							5.68057	0.000191508
							5.68671	0.000192149
							5.69286	0.00019688
							5.699	0.000199499
							5.70514	0.000200998
							5.71129	0.000201938
							5.71743	0.000197503
							5.72357	0.000193069
							5.72972	0.000193495
							5.73586	0.000182254
							5.742	0.000182801
							5.74815	0.000205771
							5.75429	0.000211137
							5.76044	0.000216504
							5.76658	0.000221656
							5.77272	0.000234805
							5.77887	0.000238706
							5.78501	0.000239442
							5.79115	0.000230835
							5.7973	0.000222228
							5.80344	0.000228739
							5.80958	0.000250163
							5.81573	0.000252151
							5.82187	0.000253333
							5.82802	0.000254515
							5.83416	0.000260828
							5.8403	0.000268794
							5.84645	0.000268893
							5.85259	0.000268992
							5.85873	0.00026623
							5.86488	0.000253121
							5.87102	0.000247881
							5.87716	0.000246154
							5.88331	0.000262589
							5.88945	0.000269267
							5.89559	0.000271918
							5.90174	0.000273381
							5.90788	0.000274843
							5.91403	0.00028665
							5.92017	0.000284852
							5.92631	0.000283053
							5.93246	0.000272853
							5.9386	0.000248164
							5.94474	0.000250528
							5.95089	0.000258774
							5.95703	0.000264881
							5.96317	0.000264658
							5.96932	0.000264435
							5.97546	0.000260484
							5.9816	0.000251719
							5.98775	0.000251411
							5.99389	0.000251007
							6.00004	0.000246382
							6.00618	0.000236155
							6.01232	0.000224062
							6.01847	0.000223781
							6.02461	0.000235367
							6.03075	0.00025626
							6.0369	0.000258349
							6.04304	0.00025913
							6.04918	0.000259911
							6.05533	0.000273678
							6.06147	0.000274662
							6.06761	0.000271143
							6.07376	0.000267623
							6.0799	0.000261313
							6.08605	0.000263615
							6.09219	0.000265917
							6.09833	0.000274753
							6.10448	0.000278031
							6.11062	0.000278948
							6.11676	0.000274204
							6.12291	0.00026946
							6.12905	0.000266687
							6.13519	0.000263914
							6.14134	0.000254722
							6.14748	0.000241206
							6.15362	0.000235746
							6.15977	0.000234038
							6.16591	0.000244923
							6.17206	0.00024755
							6.1782	0.000247817
							6.18434	0.000248083
							6.19049	0.00023263
							6.19663	0.000235696
							6.20277	0.000233345
							6.20892	0.000230995
							6.21506	0.000212792
							6.2212	0.000205179
							6.22735	0.000202627
							6.23349	0.000210081
							6.23963	0.000210486
							6.24578	0.000210891
							6.25192	0.000209152
							6.25807	0.000204924
							6.26421	0.000203937
							6.27035	0.000194204
							6.2765	0.000178586
							6.28264	0.000157524
							6.28878	0.00014301
							6.29493	0.000140718
							6.30107	0.000144724
							6.30721	0.000154283
							6.31336	0.000156362
							6.3195	0.00015844
							6.32564	0.000178071
							6.33179	0.000183569
							6.33793	0.000206966
							6.34408	0.000208644
							6.35022	0.000210321
							6.35636	0.000216099
							6.36251	0.000225521
							6.36865	0.000228291
							6.37479	0.00024448
							6.38094	0.000263798
							6.38708	0.000270311
							6.39322	0.000271113
							6.39937	0.000271062
							6.40551	0.000271011
							6.41165	0.000269906
							6.4178	0.000268802
							6.42394	0.000260087
							6.43009	0.000248491
							6.43623	0.000253666
							6.44237	0.000260269
							6.44852	0.000269909
							6.45466	0.000275021
							6.4608	0.00027587
							6.46695	0.00027672
							6.47309	0.000279302
							6.47923	0.000274578
							6.48538	0.000269853
							6.49152	0.000258213
							6.49766	0.000244681
							6.50381	0.000245644
							6.50995	0.000246607
							6.5161	0.000264368
							6.52224	0.000263284
							6.52838	0.000262201
							6.53453	0.000255219
							6.54067	0.000255905
							6.54681	0.000253903
							6.55296	0.0002519
							6.5591	0.000243248
							6.56524	0.00022892
							6.57139	0.00021541
							6.57753	0.000215164
							6.58367	0.000212548
							6.58982	0.000210353
							6.59596	0.000209063
							6.60211	0.000208756
							6.60825	0.000208449
							6.61439	0.000203627
							6.62054	0.000195366
							6.62668	0.000187104
							6.63282	0.000168528
							6.63897	0.000152037
							6.64511	0.000151301
							6.65125	0.000150566
							6.6574	0.000145016
							6.66354	0.000140697
							6.66968	0.000139857
							6.67583	0.000139933
							6.68197	0.000137247
							6.68812	0.000131011
							6.69426	0.000124775
							6.7004	0.000100585
							6.70655	9.51321e-05
							6.71269	9.53358e-05
							6.71883	8.5036e-05
							6.72498	9.74542e-05
							6.73112	0.000126015
							6.73726	0.000128916
							6.74341	0.000130553
							6.74955	0.00013219
							6.75569	0.000140153
							6.76184	0.000143797
							6.76798	0.000140766
							6.77413	0.000137736
							6.78027	0.000141676
							6.78641	0.000145035
							6.79256	0.000163771
							6.7987	0.000166096
							6.80484	0.000168422
							6.81099	0.000167006
							6.81713	0.000165591
							6.82327	0.000158666
							6.82942	0.000157068
							6.83556	0.00015547
							6.8417	0.000137294
							6.84785	0.000119702
							6.85399	0.00010425
							6.86014	9.96069e-05
							6.86628	0.000119732
							6.87242	0.000121538
							6.87857	0.000121548
							6.88471	0.000121557
							6.89085	0.000118493
							6.897	0.00012153
							6.90314	0.000122324
							6.90928	0.00010914
							6.91543	9.5956e-05
							6.92157	8.22794e-05
							6.92772	8.70169e-05
							6.93386	9.93281e-05
							6.94	0.000116499
							6.94615	0.000116024
							6.95229	0.000115548
							6.95843	0.000113449
							6.96458	0.000113795
							6.97072	0.000107841
							6.97686	0.000101886
							6.98301	9.2642e-05
							6.98915	8.12917e-05
							6.99529	6.77513e-05
							7.00144	6.29001e-05
							7.00758	8.6628e-05
							7.01373	9.91331e-05
							7.01987	0.000102589
							7.02601	0.000106045
							7.03216	0.000110311
							7.0383	0.000110386
							7.04444	0.00011046
							7.05059	0.000103934
							7.05673	9.19009e-05
							7.06287	8.73446e-05
							7.06902	9.12363e-05
							7.07516	0.000105634
							7.0813	0.00012007
							7.08745	0.000120884
							7.09359	0.000120758
							7.09974	0.000120631
							7.10588	0.000122831
							7.11202	0.000123767
							7.11817	0.000118974
							7.12431	0.000114181
							7.13045	0.000112476
							7.1366	0.000110476
							7.14274	0.000112707
							7.14888	0.000119361
							7.15503	0.000121657
							7.16117	0.000123953
							7.16731	0.00013005
							7.17346	0.000137086
							7.1796	0.000132736
							7.18575	0.000128386
							7.19189	0.000117683
							7.19803	0.000115293
							7.20418	0.000117621
							7.21032	0.000119949
							7.21646	0.00013062
							7.22261	0.00014566
							7.22875	0.000159103
							7.23489	0.000177038
							7.24104	0.000179444
							7.24718	0.00018185
							7.25332	0.000181279
							7.25947	0.000180708
							7.26561	0.000176493
							7.27176	0.000174689
							7.2779	0.000180863
							7.28404	0.000190185
							7.29019	0.000202242
							7.29633	0.000207333
							7.30247	0.000209356
							7.30862	0.000211379
							7.31476	0.000219992
							7.3209	0.000224287
							7.32705	0.00022388
							7.33319	0.000223473
							7.33933	0.000211191
							7.34548	0.0002278
							7.35162	0.000236488
							7.35777	0.000254964
							7.36391	0.000262077
							7.37005	0.000269191
							7.3762	0.000273705
							7.38234	0.000275684
							7.38848	0.000271804
							7.39463	0.000267925
							7.40077	0.000271856
							7.40691	0.000271437
							7.41306	0.000271018
							7.4192	0.000266416
							7.42534	0.000272747
							7.43149	0.000286509
							7.43763	0.000287634
							7.44378	0.000287751
							7.44992	0.000287868
							7.45606	0.000290584
							7.46221	0.000289224
							7.46835	0.000287865
							7.47449	0.000254752
							7.48064	0.000250928
							7.48678	0.000250043
							7.49292	0.000258986
							7.49907	0.000277144
							7.50521	0.000285756
							7.51135	0.000292045
							7.5175	0.00030027
							7.52364	0.00030876
							7.52979	0.000326852
							7.53593	0.000327884
							7.54207	0.000328353
							7.54822	0.000328823
							7.55436	0.000323397
							7.5605	0.000328351
							7.56665	0.000350714
							7.57279	0.000382848
							7.57893	0.000385126
							7.58508	0.000387405
							7.59122	0.000404082
							7.59736	0.000434869
							7.60351	0.000437998
							7.60965	0.000438513
							7.6158	0.000439029
							7.62194	0.00043863
							7.62808	0.000448721
							7.63423	0.000449805
							7.64037	0.000477818
							7.64651	0.00048296
							7.65266	0.000488102
							7.6588	0.000495372
							7.66494	0.000502642
							7.67109	0.00050503
							7.67723	0.000518995
							7.68337	0.000525109
							7.68952	0.000535151
							7.69566	0.000537839
							7.70181	0.000552001
							7.70795	0.000588945
							7.71409	0.000620127
							7.72024	0.000629525
							7.72638	0.000635669
							7.73252	0.000644418
							7.73867	0.000666558
							7.74481	0.000664579
							7.75095	0.0006626
							7.7571	0.00065394
							7.76324	0.00065031
							7.76938	0.000651726
							7.77553	0.000669195
							7.78167	0.00070201
							7.78782	0.000714867
							7.79396	0.000720171
							7.8001	0.000721892
							7.80625	0.000723613
							7.81239	0.000749573
							7.81853	0.000767765
							7.82468	0.000769545
							7.83082	0.000770627
							7.83696	0.000771708
							7.84311	0.000784113
							7.84925	0.000826642
							7.85539	0.000865926
							7.86154	0.000882838
							7.86768	0.000902809
							7.87383	0.000942254
							7.87997	0.000983158
							7.88611	0.0010096
							7.89226	0.00101616
							7.8984	0.00101753
							7.90454	0.00103905
							7.91069	0.00106897
							7.91683	0.0010953
							7.92297	0.00113518
							7.92912	0.00116158
							7.93526	0.0011876
							7.9414	0.00122024
							7.94755	0.00124447
							7.95369	0.00127582
							7.95984	0.00128163
							7.96598	0.00128744
							7.97212	0.00129802
							7.97827	0.00131364
							7.98441	0.00133908
							7.99055	0.00138153
							7.9967	0.00140103
							8.00284	0.00140526
							8.00898	0.00141181
							8.01513	0.00141954
							8.02127	0.00143087
							8.02742	0.00143513
							8.03356	0.00143626
							8.0397	0.00143739
							8.04585	0.00144702
							8.05199	0.00145391
							8.05813	0.00147594
							8.06428	0.00149878
							8.07042	0.00150362
							8.07656	0.00151612
							8.08271	0.00152126
							8.08885	0.0015264
							8.09499	0.00152881
							8.10114	0.00152687
							8.10728	0.00152492
							8.11343	0.0015078
							8.11957	0.00150941
							8.12571	0.00151918
							8.13186	0.00152148
							8.138	0.00152034
							8.14414	0.0015192
							8.15029	0.00151368
							8.15643	0.00151428
							8.16257	0.00151356
							8.16872	0.00151284
							8.17486	0.00146837
							8.181	0.00144288
							8.18715	0.00144378
							8.19329	0.00144468
							8.19944	0.00145357
							8.20558	0.00145741
							8.21172	0.00145597
							8.21787	0.00145453
							8.22401	0.001451
							8.23015	0.00144744
							8.2363	0.00144388
							8.24244	0.00143273
							8.24858	0.00140798
							8.25473	0.00139379
							8.26087	0.00139123
							8.26701	0.00140981
							8.27316	0.00141
							8.2793	0.00141019
							8.28545	0.00140263
							8.29159	0.00140763
							8.29773	0.00141142
							8.30388	0.00140787
							8.31002	0.00140432
							8.31616	0.00137563
							8.32231	0.00135652
							8.32845	0.00135011
							8.33459	0.00135432
							8.34074	0.00135917
							8.34688	0.00136339
							8.35302	0.00136021
							8.35917	0.00135703
							8.36531	0.00135001
							8.37146	0.00135742
							8.3776	0.00135315
							8.38374	0.00134888
							8.38989	0.00133959
							8.39603	0.00134197
							8.40217	0.00134358
							8.40832	0.00136059
							8.41446	0.00137263
							8.4206	0.00137672
							8.42675	0.00137861
							8.43289	0.0013805
							8.43903	0.00138575
							8.44518	0.0013863
							8.45132	0.00138685
							8.45747	0.00137275
							8.46361	0.00136551
							8.46975	0.00136864
							8.4759	0.0013789
							8.48204	0.00139212
							8.48818	0.00139358
							8.49433	0.00139505
							8.50047	0.00140661
							8.50661	0.00141305
							8.51276	0.00141889
							8.5189	0.00142268
							8.52504	0.00141981
							8.53119	0.00141694
							8.53733	0.00141027
							8.54348	0.00141245
							8.54962	0.00144107
							8.55576	0.00145004
							8.56191	0.00145478
							8.56805	0.00145952
							8.57419	0.00146927
							8.58034	0.00149377
							8.58648	0.00149332
							8.59262	0.00149288
							8.59877	0.00148921
							8.60491	0.00151127
							8.61105	0.00153475
							8.6172	0.00153931
							8.62334	0.00157825
							8.62949	0.00160691
							8.63563	0.00163073
							8.64177	0.0016665
							8.64792	0.00168801
							8.65406	0.00170648
							8.6602	0.00172552
							8.66635	0.0017348
							8.67249	0.00173913
							8.67863	0.00174347
							8.68478	0.00176839
							8.69092	0.00180759
							8.69706	0.00183147
							8.70321	0.00185723
							8.70935	0.00187558
							8.7155	0.00189217
							8.72164	0.00193132
							8.72778	0.00196459
							8.73393	0.00197566
							8.74007	0.00198935
							8.74621	0.00200768
							8.75236	0.0020468
							8.7585	0.00210141
							8.76464	0.00215097
							8.77079	0.00218793
							8.77693	0.00223481
							8.78307	0.00228056
							8.78922	0.00232588
							8.79536	0.0023667
							8.80151	0.00240758
							8.80765	0.0024405
							8.81379	0.0024749
							8.81994	0.00252802
							8.82608	0.00258772
							8.83222	0.00265695
							8.83837	0.00271408
							8.84451	0.00275724
							8.85065	0.00280511
							8.8568	0.00286925
							8.86294	0.0029344
							8.86908	0.0029918
							8.87523	0.00303813
							8.88137	0.0030894
							8.88752	0.00313779
							8.89366	0.00319112
							8.8998	0.00326835
							8.90595	0.00336093
							8.91209	0.00343163
							8.91823	0.0034951
							8.92438	0.00356338
							8.93052	0.00364043
							8.93666	0.0037368
							8.94281	0.00381487
							8.94895	0.00388871
							8.95509	0.0039649
							8.96124	0.00404542
							8.96738	0.00413498
							8.97353	0.00424388
							8.97967	0.00433261
							8.98581	0.00440869
							8.99196	0.00449052
							8.9981	0.00458365
							9.00424	0.00469481
							9.01039	0.00478409
							9.01653	0.00486574
							9.02267	0.00495237
							9.02882	0.00505876
							9.03496	0.0051447
							9.0411	0.00524795
							9.04725	0.00536378
							9.05339	0.00548265
							9.05954	0.00558688
							9.06568	0.00571314
							9.07182	0.00583085
							9.07797	0.0059653
							9.08411	0.00609241
							9.09025	0.00619748
							9.0964	0.00631723
							9.10254	0.00644303
							9.10868	0.00658327
							9.11483	0.00672604
							9.12097	0.00685477
							9.12712	0.00698827
							9.13326	0.00713956
							9.1394	0.00727314
							9.14555	0.00743361
							9.15169	0.00757737
							9.15783	0.00771338
							9.16398	0.00785588
							9.17012	0.008011
							9.17626	0.00816556
							9.18241	0.00833529
							9.18855	0.00852507
							9.19469	0.00870456
							9.20084	0.00887308
							9.20698	0.00904931
							9.21313	0.00925835
							9.21927	0.00945852
							9.22541	0.00965056
							9.23156	0.00982162
							9.2377	0.0100242
							9.24384	0.0102093
							9.24999	0.0104297
							9.25613	0.0106411
							9.26227	0.0108536
							9.26842	0.0110707
							9.27456	0.0113208
							9.2807	0.011569
							9.28685	0.0118174
							9.29299	0.0120827
							9.29914	0.012339
							9.30528	0.0125932
							9.31142	0.0128526
							9.31757	0.0131462
							9.32371	0.0134324
							9.32985	0.013742
							9.336	0.0140542
							9.34214	0.0144124
							9.34828	0.0147413
							9.35443	0.0151132
							9.36057	0.015504
							9.36671	0.0159035
							9.37286	0.0162642
							9.379	0.0166396
							9.38515	0.0170693
							9.39129	0.0175089
							9.39743	0.0179552
							9.40358	0.0184029
							9.40972	0.0189202
							9.41586	0.0194237
							9.42201	0.0199863
							9.42815	0.0205526
							9.43429	0.0211604
							9.44044	0.0217248
							9.44658	0.0223663
							9.45272	0.0229591
							9.45887	0.0236067
							9.46501	0.0242481
							9.47116	0.0249724
							9.4773	0.0257006
							9.48344	0.0264397
							9.48959	0.0272631
							9.49573	0.0281176
							9.50187	0.0289872
							9.50802	0.0298305
							9.51416	0.0307347
							9.5203	0.0315922
							9.52645	0.0325244
							9.53259	0.0334325
							9.53873	0.0344639
							9.54488	0.0354397
							9.55102	0.0365165
							9.55717	0.0375847
							9.56331	0.0387458
							9.56945	0.0399051
							9.5756	0.0410589
							9.58174	0.0423009
							9.58788	0.0434392
							9.59403	0.0446747
							9.60017	0.045814
							9.60631	0.0471122
							9.61246	0.0483633
							9.6186	0.0497553
							9.62474	0.0510622
							9.63089	0.0525065
							9.63703	0.0538842
							9.64318	0.0554363
							9.64932	0.0568227
							9.65546	0.0582619
							9.66161	0.059631
							9.66775	0.0610599
							9.67389	0.0624308
							9.68004	0.0638377
							9.68618	0.0654002
							9.69232	0.0669364
							9.69847	0.0683994
							9.70461	0.0698497
							9.71075	0.0714807
							9.7169	0.0729582
							9.72304	0.0744804
							9.72919	0.0758883
							9.73533	0.0773444
							9.74147	0.0786727
							9.74762	0.0801251
							9.75376	0.0815375
							9.7599	0.0830156
							9.76605	0.0844067
							9.77219	0.0857586
							9.77833	0.087265
							9.78448	0.0886481
							9.79062	0.0900405
							9.79676	0.0912601
							9.80291	0.0927454
							9.80905	0.0941017
							9.8152	0.0953787
							9.82134	0.0965296
							9.82748	0.0977589
							9.83363	0.0990021
							9.83977	0.100438
							9.84591	0.101646
							9.85206	0.102783
							9.8582	0.103797
							9.86434	0.104773
							9.87049	0.105654
							9.87663	0.106604
							9.88277	0.107702
							9.88892	0.108637
							9.89506	0.109431
							9.90121	0.110182
							9.90735	0.110945
							9.91349	0.11161
							9.91964	0.112303
							9.92578	0.11294
							9.93192	0.113551
							9.93807	0.114064
							9.94421	0.114589
							9.95035	0.115059
							9.9565	0.115554
							9.96264	0.116013
							9.96878	0.116445
							9.97493	0.116892
							9.98107	0.117266
							9.98722	0.117661
							9.99336	0.118005
							9.9995	0.11834
							10.0056	0.118632
							10.0118	0.118935
							10.0179	0.119209
							10.0241	0.119505
							10.0302	0.1198
							10.0364	0.120104
							10.0425	0.120383
							10.0487	0.120676
							10.0548	0.121045
							10.0609	0.121559
							10.0671	0.121903
							10.0732	0.122179
							10.0794	0.122518
							10.0855	0.122828
							10.0917	0.123152
							10.0978	0.12349
							10.1039	0.123863
							10.1101	0.124242
							10.1162	0.124663
							10.1224	0.125083
							10.1285	0.125568
							10.1347	0.126052
							10.1408	0.126574
							10.1469	0.127102
							10.1531	0.127682
							10.1592	0.128259
							10.1654	0.128877
							10.1715	0.129614
							10.1777	0.130322
							10.1838	0.131138
							10.19	0.131932
							10.1961	0.132848
							10.2022	0.133788
							10.2084	0.134823
							10.2145	0.135807
							10.2207	0.136907
							10.2268	0.137978
							10.233	0.139163
							10.2391	0.140378
							10.2452	0.141629
							10.2514	0.143079
							10.2575	0.144584
							10.2637	0.14606
							10.2698	0.147678
							10.276	0.149489
							10.2821	0.151282
							10.2883	0.15299
							10.2944	0.154774
							10.3005	0.156689
							10.3067	0.158629
							10.3128	0.160827
							10.319	0.163036
							10.3251	0.165475
							10.3313	0.167851
							10.3374	0.170358
							10.3435	0.173303
							10.3497	0.176043
							10.3558	0.179042
							10.362	0.181903
							10.3681	0.18506
							10.3743	0.188038
							10.3804	0.191576
							10.3865	0.195016
							10.3927	0.198892
							10.3988	0.202733
							10.405	0.207027
							10.4111	0.211451
							10.4173	0.216451
							10.4234	0.221022
							10.4296	0.226462
							10.4357	0.231705
							10.4418	0.236363
							10.448	0.241789
							10.4541	0.247572
							10.4603	0.253293
							10.4664	0.259175
							10.4726	0.266007
							10.4787	0.272662
							10.4848	0.280034
							10.491	0.28706
							10.4971	0.294518
							10.5033	0.301561
							10.5094	0.308582
							10.5156	0.316494
							10.5217	0.32489
							10.5279	0.333177
							10.534	0.341653
							10.5401	0.351116
							10.5463	0.360065
							10.5524	0.3705
							10.5586	0.380355
							10.5647	0.390876
							10.5709	0.400699
							10.577	0.411323
							10.5831	0.420901
							10.5893	0.431751
							10.5954	0.442637
							10.6016	0.454455
							10.6077	0.465642
							10.6139	0.477637
							10.62	0.489588
							10.6261	0.502727
							10.6323	0.514835
							10.6384	0.526392
							10.6446	0.53899
							10.6507	0.551033
							10.6569	0.562841
							10.663	0.575069
							10.6692	0.588528
							10.6753	0.600916
							10.6814	0.6141
							10.6876	0.626706
							10.6937	0.640815
							10.6999	0.653666
							10.706	0.665855
							10.7122	0.678832
							10.7183	0.691083
							10.7244	0.702463
							10.7306	0.714125
							10.7367	0.727077
							10.7429	0.738874
							10.749	0.751618
							10.7552	0.762858
							10.7613	0.774975
							10.7674	0.786331
							10.7736	0.798181
							10.7797	0.808496
							10.7859	0.819191
							10.792	0.828849
							10.7982	0.839256
							10.8043	0.849017
							10.8105	0.859277
							10.8166	0.868678
							10.8227	0.878073
							10.8289	0.886861
							10.835	0.895539
							10.8412	0.90447
							10.8473	0.912435
							10.8535	0.919596
							10.8596	0.926223
							10.8657	0.933331
							10.8719	0.940065
							10.878	0.947085
							10.8842	0.953188
							10.8903	0.959161
							10.8965	0.964329
							10.9026	0.96918
							10.9088	0.974064
							10.9149	0.978214
							10.921	0.98173
							10.9272	0.984809
							10.9333	0.987759
							10.9395	0.990296
							10.9456	0.992913
							10.9518	0.995045
							10.9579	0.996914
							10.964	0.998193
							10.9702	0.999246
							10.9763	0.999912
							10.9825	1
							10.9886	0.999972
							10.9948	0.999944
							11.0009	0.999428
							11.007	0.998629
							11.0132	0.997647
							11.0193	0.99632
							11.0255	0.994752
							11.0316	0.992896
							11.0378	0.990521
							11.0439	0.987818
							11.0501	0.985
							11.0562	0.982137
							11.0623	0.978871
							11.0685	0.975786
							11.0746	0.972361
							11.0808	0.968807
							11.0869	0.964704
							11.0931	0.960612
							11.0992	0.956182
							11.1053	0.951235
							11.1115	0.94588
							11.1176	0.940341
							11.1238	0.93505
							11.1299	0.929318
							11.1361	0.924074
							11.1422	0.918709
							11.1484	0.91364
							11.1545	0.907713
							11.1606	0.90209
							11.1668	0.895783
							11.1729	0.889894
							11.1791	0.883368
							11.1852	0.876767
							11.1914	0.869738
							11.1975	0.863478
							11.2036	0.856931
							11.2098	0.850872
							11.2159	0.844494
							11.2221	0.838119
							11.2282	0.831695
							11.2344	0.824558
							11.2405	0.817415
							11.2466	0.810553
							11.2528	0.803488
							11.2589	0.795674
							11.2651	0.788844
							11.2712	0.781679
							11.2774	0.775133
							11.2835	0.768832
							11.2897	0.76276
							11.2958	0.756018
							11.3019	0.748558
							11.3081	0.741152
							11.3142	0.734139
							11.3204	0.727094
							11.3265	0.71909
							11.3327	0.711951
							11.3388	0.704559
							11.3449	0.697887
							11.3511	0.690927
							11.3572	0.684557
							11.3634	0.677256
							11.3695	0.67045
							11.3757	0.663119
							11.3818	0.656191
							11.388	0.648745
							11.3941	0.641593
							11.4002	0.63403
							11.4064	0.627222
							11.4125	0.620289
							11.4187	0.613936
							11.4248	0.607928
							11.431	0.601104
							11.4371	0.59414
							11.4432	0.587527
							11.4494	0.581026
							11.4555	0.574178
							11.4617	0.567389
							11.4678	0.560041
							11.474	0.553463
							11.4801	0.546839
							11.4862	0.540707
							11.4924	0.534988
							11.4985	0.528703
							11.5047	0.522297
							11.5108	0.516166
							11.517	0.510107
							11.5231	0.503542
							11.5293	0.497509
							11.5354	0.490657
							11.5415	0.484511
							11.5477	0.478305
							11.5538	0.472623
							11.56	0.466865
							11.5661	0.461583
							11.5723	0.455814
							11.5784	0.45019
							11.5845	0.444296
							11.5907	0.438682
							11.5968	0.432859
							11.603	0.427122
							11.6091	0.421035
							11.6153	0.415593
							11.6214	0.410493
							11.6276	0.405065
							11.6337	0.399997
							11.6398	0.39502
							11.646	0.389791
							11.6521	0.384438
							11.6583	0.37939
							11.6644	0.374556
							11.6706	0.369196
							11.6767	0.363711
							11.6828	0.358677
							11.689	0.354015
							11.6951	0.349093
							11.7013	0.344828
							11.7074	0.340295
							11.7136	0.335969
							11.7197	0.331184
							11.7258	0.326774
							11.732	0.322023
							11.7381	0.317716
							11.7443	0.312916
							11.7504	0.30836
							11.7566	0.303805
							11.7627	0.299804
							11.7689	0.295951
							11.775	0.291924
							11.7811	0.287932
							11.7873	0.284033
							11.7934	0.280189
							11.7996	0.276025
							11.8057	0.2723
							11.8119	0.268119
							11.818	0.263977
							11.8241	0.259759
							11.8303	0.256232
							11.8364	0.252582
							11.8426	0.249308
							11.8487	0.245909
							11.8549	0.242538
							11.861	0.23921
							11.8671	0.235622
							11.8733	0.232209
							11.8794	0.228958
							11.8856	0.225072
							11.8917	0.220933
							11.8979	0.217899
							11.904	0.214686
							11.9102	0.211697
							11.9163	0.208634
							11.9224	0.205889
							11.9286	0.202816
							11.9347	0.200008
							11.9409	0.197067
							11.947	0.194361
							11.9532	0.191396
							11.9593	0.188626
							11.9654	0.185828
							11.9716	0.183298
							11.9777	0.180735
							11.9839	0.178457
							11.99	0.176221
							11.9962	0.173659
							12.0023	0.171335
							12.0085	0.168841
							12.0146	0.166632
							12.0207	0.164225
							12.0269	0.161905
							12.033	0.159516
							12.0392	0.157416
							12.0453	0.155294
							12.0515	0.153392
							12.0576	0.151605
							12.0637	0.149589
							12.0699	0.147584
							12.076	0.145693
							12.0822	0.143867
							12.0883	0.141941
							12.0945	0.140127
							12.1006	0.138131
							12.1067	0.136407
							12.1129	0.134645
							12.119	0.133095
							12.1252	0.131513
							12.1313	0.130055
							12.1375	0.128422
							12.1436	0.126887
							12.1498	0.125294
							12.1559	0.12388
							12.162	0.122247
							12.1682	0.120417
							12.1743	0.11891
							12.1805	0.117577
							12.1866	0.116334
							12.1928	0.115072
							12.1989	0.113948
							12.205	0.112714
							12.2112	0.111541
							12.2173	0.110314
							12.2235	0.109213
							12.2296	0.108011
							12.2358	0.106654
							12.2419	0.105282
							12.2481	0.104254
							12.2542	0.103299
							12.2603	0.102318
							12.2665	0.101358
							12.2726	0.100232
							12.2788	0.0991579
							12.2849	0.0982136
							12.2911	0.097383
							12.2972	0.0965189
							12.3033	0.0957125
							12.3095	0.0948076
							12.3156	0.0940153
							12.3218	0.0930306
							12.3279	0.0921121
							12.3341	0.0913783
							12.3402	0.090747
							12.3463	0.0900474
							12.3525	0.0893997
							12.3586	0.0887781
							12.3648	0.0881277
							12.3709	0.0875016
							12.3771	0.0868913
							12.3832	0.0862894
							12.3894	0.0856886
							12.3955	0.0851844
							12.4016	0.0846695
							12.4078	0.0842181
							12.4139	0.0837256
							12.4201	0.0832668
							12.4262	0.0827794
							12.4324	0.0823369
							12.4385	0.0819139
							12.4446	0.0814919
							12.4508	0.0810509
							12.4569	0.0806153
							12.4631	0.0802334
							12.4692	0.0798864
							12.4754	0.0795682
							12.4815	0.0792302
							12.4877	0.0789087
							12.4938	0.0785478
							12.4999	0.0782312
							12.5061	0.0779245
							12.5122	0.0776551
							12.5184	0.0773205
							12.5245	0.0770078
							12.5307	0.0767025
							12.5368	0.0764398
							12.5429	0.0762052
							12.5491	0.0759847
							12.5552	0.0757342
							12.5614	0.0754757
							12.5675	0.075236
							12.5737	0.0750068
							12.5798	0.0747883
							12.5859	0.0745288
							12.5921	0.0742716
							12.5982	0.0740143
							12.6044	0.0737963
							12.6105	0.0735615
							12.6167	0.0733676
							12.6228	0.0731637
							12.629	0.0729559
							12.6351	0.0727239
							12.6412	0.0725074
							12.6474	0.0723288
							12.6535	0.072133
							12.6597	0.0719006
							12.6658	0.0716726
							12.672	0.0714847
							12.6781	0.0712876
							12.6842	0.0711089
							12.6904	0.0709328
							12.6965	0.0707615
							12.7027	0.0705625
							12.7088	0.0703839
							12.715	0.0702013
							12.7211	0.0700256
							12.7273	0.0698021
							12.7334	0.0695947
							12.7395	0.0694036
							12.7457	0.0692329
							12.7518	0.0690543
							12.758	0.0688837
							12.7641	0.0687154
							12.7703	0.0685323
							12.7764	0.0683576
							12.7825	0.06817
							12.7887	0.0680015
							12.7948	0.0678222
							12.801	0.067633
							12.8071	0.0674214
							12.8133	0.0672475
							12.8194	0.0670725
							12.8255	0.066921
							12.8317	0.066769
							12.8378	0.066607
							12.844	0.0664487
							12.8501	0.0662739
							12.8563	0.0660961
							12.8624	0.0659357
							12.8686	0.0657587
							12.8747	0.0655608
							12.8808	0.0654023
							12.887	0.0652348
							12.8931	0.0650898
							12.8993	0.0649415
							12.9054	0.0648116
							12.9116	0.0646553
							12.9177	0.0644883
							12.9238	0.0643395
							12.93	0.0642072
							12.9361	0.064045
							12.9423	0.0638763
							12.9484	0.0637055
							12.9546	0.0635475
							12.9607	0.0634009
							12.9668	0.0632832
							12.973	0.0631558
							12.9791	0.0630098
							12.9853	0.0628795
							12.9914	0.062744
							12.9976	0.0626264
							13.0037	0.0624888
							13.0099	0.0623278
							13.016	0.0621756
							13.0221	0.0620538
							13.0283	0.0619108
							13.0344	0.061782
							13.0406	0.061679
							13.0467	0.0615527
							13.0529	0.0614038
							13.059	0.0612738
							13.0651	0.0611457
							13.0713	0.0610223
							13.0774	0.0608903
							13.0836	0.0607138
							13.0897	0.0605764
							13.0959	0.0604491
							13.102	0.0603421
							13.1082	0.0602315
							13.1143	0.0601124
							13.1204	0.0599838
							13.1266	0.0598496
							13.1327	0.0597215
							13.1389	0.059595
							13.145	0.0594735
							13.1512	0.0593304
							13.1573	0.0591895
							13.1634	0.0590673
							13.1696	0.0589496
							13.1757	0.0588471
							13.1819	0.0587714
							13.188	0.0586715
							13.1942	0.0585675
							13.2003	0.0584659
							13.2064	0.0583791
							13.2126	0.0583024
							13.2187	0.0581951
							13.2249	0.0580657
							13.231	0.0579621
							13.2372	0.0578879
							13.2433	0.0578106
							13.2495	0.0577467
							13.2556	0.0576664
							13.2617	0.0575892
							13.2679	0.0575076
							13.274	0.0574297
							13.2802	0.0573507
							13.2863	0.0572635
							13.2925	0.0571588
							13.2986	0.0570762
							13.3047	0.0569825
							13.3109	0.0569036
							13.317	0.0568682
							13.3232	0.056824
							13.3293	0.056756
							13.3355	0.0566878
							13.3416	0.0566169
							13.3478	0.0565699
							13.3539	0.0565363
							13.36	0.0564581
							13.3662	0.0563816
							13.3723	0.0563195
							13.3785	0.0562697
							13.3846	0.0562441
							13.3908	0.0562234
							13.3969	0.0561886
							13.403	0.0561602
							13.4092	0.0561224
							13.4153	0.0560846
							13.4215	0.0560672
							13.4276	0.056035
							13.4338	0.055995
							13.4399	0.0559538
							13.446	0.0559316
							13.4522	0.055916
							13.4583	0.055911
							13.4645	0.0559059
							13.4706	0.0559008
							13.4768	0.0558907
							13.4829	0.0558813
							13.4891	0.0558767
							13.4952	0.055875
							13.5013	0.0558733
							13.5075	0.0558443
							13.5136	0.0558337
							13.5198	0.0558457
							13.5259	0.0558622
							13.5321	0.055875
							13.5382	0.055876
							13.5443	0.0558837
							13.5505	0.0558948
							13.5566	0.0559083
							13.5628	0.0559234
							13.5689	0.0559435
							13.5751	0.0559551
							13.5812	0.0559598
							13.5874	0.0559731
							13.5935	0.0560003
							13.5996	0.0560614
							13.6058	0.0561159
							13.6119	0.0561496
							13.6181	0.0561916
							13.6242	0.0562345
							13.6304	0.0562883
							13.6365	0.0563353
							13.6426	0.0563533
							13.6488	0.056377
							13.6549	0.0564037
							13.6611	0.0564454
							13.6672	0.0565036
							13.6734	0.0565571
							13.6795	0.056594
							13.6856	0.0566369
							13.6918	0.056662
							13.6979	0.0566946
							13.7041	0.0567442
							13.7102	0.0567757
							13.7164	0.0568129
							13.7225	0.0568467
							13.7287	0.0568748
							13.7348	0.0569265
							13.7409	0.056997
							13.7471	0.057067
							13.7532	0.0571346
							13.7594	0.0571843
							13.7655	0.0572366
							13.7717	0.0573007
							13.7778	0.0573711
							13.7839	0.0574254
							13.7901	0.0574776
							13.7962	0.0575307
							13.8024	0.0576009
							13.8085	0.0576965
							13.8147	0.0577784
							13.8208	0.0578529
							13.827	0.0579368
							13.8331	0.0580252
							13.8392	0.0581027
							13.8454	0.0581778
							13.8515	0.0582482
							13.8577	0.0583243
							13.8638	0.0583822
							13.87	0.0584424
							13.8761	0.0585031
							13.8822	0.058606
							13.8884	0.0587088
							13.8945	0.0587919
							13.9007	0.0588562
							13.9068	0.0589284
							13.913	0.0590274
							13.9191	0.0591094
							13.9252	0.0591653
							13.9314	0.0592316
							13.9375	0.0593293
							13.9437	0.0594166
							13.9498	0.0595099
							13.956	0.0595952
							13.9621	0.0596917
							13.9683	0.05979
							13.9744	0.059885
							13.9805	0.059981
							13.9867	0.0600849
							13.9928	0.06017
							13.999	0.0602424
							14.0051	0.0603213
							14.0113	0.0604143
							14.0174	0.0605265
							14.0235	0.0606453
							14.0297	0.0607637
							14.0358	0.0608601
							14.042	0.0609573
							14.0481	0.0610678
							14.0543	0.0612053
							14.0604	0.0613116
							14.0665	0.0614016
							14.0727	0.0614974
							14.0788	0.0616074
							14.085	0.0617155
							14.0911	0.0618414
							14.0973	0.0619503
							14.1034	0.0620486
							14.1096	0.0621621
							14.1157	0.0622711
							14.1218	0.0623832
							14.128	0.0624986
							14.1341	0.0626048
							14.1403	0.0627011
							14.1464	0.0628125
							14.1526	0.0629195
							14.1587	0.0630604
							14.1648	0.0631944
							14.171	0.0633091
							14.1771	0.0634312
							14.1833	0.0635637
							14.1894	0.0636873
							14.1956	0.0638174
							14.2017	0.0639526
							14.2079	0.0640779
							14.214	0.0641896
							14.2201	0.0643175
							14.2263	0.064472
							14.2324	0.0646146
							14.2386	0.0647673
							14.2447	0.064903
							14.2509	0.0650486
							14.257	0.0651815
							14.2631	0.0653419
							14.2693	0.0654935
							14.2754	0.0656428
							14.2816	0.0657727
							14.2877	0.0659178
							14.2939	0.0660601
							14.3	0.0662161
							14.3061	0.0663902
							14.3123	0.0665543
							14.3184	0.0667047
							14.3246	0.0668425
							14.3307	0.0670118
							14.3369	0.0671628
							14.343	0.0673035
							14.3492	0.0674433
							14.3553	0.0676019
							14.3614	0.067749
							14.3676	0.0679143
							14.3737	0.0680844
							14.3799	0.0682533
							14.386	0.0684169
							14.3922	0.0685767
							14.3983	0.0687463
							14.4044	0.0689194
							14.4106	0.0690894
							14.4167	0.0692567
							14.4229	0.0694317
							14.429	0.0695982
							14.4352	0.0697913
							14.4413	0.0699747
							14.4475	0.0701764
							14.4536	0.0703667
							14.4597	0.0705645
							14.4659	0.0707583
							14.472	0.0709705
							14.4782	0.0711688
							14.4843	0.0713586
							14.4905	0.0715278
							14.4966	0.0717098
							14.5027	0.0719151
							14.5089	0.0721131
							14.515	0.072314
							14.5212	0.0725179
							14.5273	0.0727228
							14.5335	0.0729226
							14.5396	0.0731272
							14.5457	0.0733297
							14.5519	0.0735535
							14.558	0.0737481
							14.5642	0.07395
							14.5703	0.0741552
							14.5765	0.0743786
							14.5826	0.0745967
							14.5888	0.0748177
							14.5949	0.075064
							14.601	0.0752826
							14.6072	0.0755067
							14.6133	0.0757365
							14.6195	0.0759865
							14.6256	0.0761893
							14.6318	0.0764073
							14.6379	0.0766304
							14.644	0.0768587
							14.6502	0.0770771
							14.6563	0.0773391
							14.6625	0.0775802
							14.6686	0.0777999
							14.6748	0.0780562
							14.6809	0.0783088
							14.6871	0.0785472
							14.6932	0.0787779
							14.6993	0.0790136
							14.7055	0.0792371
							14.7116	0.0794856
							14.7178	0.0797251
							14.7239	0.0799954
							14.7301	0.0802429
							14.7362	0.0804908
							14.7423	0.0807296
							14.7485	0.0810019
							14.7546	0.081269
							14.7608	0.0815237
							14.7669	0.0817733
							14.7731	0.0820164
							14.7792	0.0822824
							14.7853	0.0825235
							14.7915	0.0827904
							14.7976	0.0830502
							14.8038	0.0833154
							14.8099	0.0835664
							14.8161	0.0838357
							14.8222	0.0840967
							14.8284	0.0843786
							14.8345	0.0846266
							14.8406	0.0848831
							14.8468	0.0851343
							14.8529	0.0854115
							14.8591	0.0856807
							14.8652	0.0859447
							14.8714	0.0862304
							14.8775	0.0865117
							14.8836	0.0867725
							14.8898	0.0870409
							14.8959	0.0873463
							14.9021	0.0876163
							14.9082	0.0878924
							14.9144	0.0881515
							14.9205	0.0884449
							14.9267	0.0887154
							14.9328	0.0890093
							14.9389	0.089289
							14.9451	0.0895833
							14.9512	0.0898689
							14.9574	0.0901535
							14.9635	0.0904711
							14.9697	0.0907657
							14.9758	0.0910776
							14.9819	0.0913597
							14.9881	0.0916753
							14.9942	0.0919517
							15.0004	0.0922762
							15.0065	0.0925959
							15.0127	0.0930464
							15.0188	0.0934418
							15.0249	0.0938878
							15.0311	0.0943361
							15.0372	0.0946801
							15.0434	0.0950083
							15.0495	0.0953418
							15.0557	0.0956551
							15.0618	0.0959774
							15.068	0.0963315
							15.0741	0.096689
							15.0802	0.0970371
							15.0864	0.0973845
							15.0925	0.0977495
							15.0987	0.0980741
							15.1048	0.0984469
							15.111	0.0988234
							15.1171	0.0992131
							15.1232	0.0995492
							15.1294	0.0999109
							15.1355	0.100268
							15.1417	0.100867
							15.1478	0.101496
							15.154	0.101932
							15.1601	0.102348
							15.1662	0.102726
							15.1724	0.10314
							15.1785	0.10352
							15.1847	0.10395
							15.1908	0.104331
							15.197	0.104753
							15.2031	0.105141
							15.2093	0.105549
							15.2154	0.10595
							15.2215	0.106409
							15.2277	0.10696
							15.2338	0.107634
							15.24	0.108137
							15.2461	0.108586
							15.2523	0.109035
							15.2584	0.109462
							15.2645	0.109929
							15.2707	0.110385
							15.2768	0.1108
							15.283	0.111237
							15.2891	0.111736
							15.2953	0.112181
							15.3014	0.112674
							15.3076	0.11315
							15.3137	0.113662
							15.3198	0.114153
							15.326	0.114684
							15.3321	0.11517
							15.3383	0.115681
							15.3444	0.116168
							15.3506	0.116651
							15.3567	0.117204
							15.3628	0.117725
							15.369	0.118303
							15.3751	0.11883
							15.3813	0.119399
							15.3874	0.119934
							15.3936	0.120548
							15.3997	0.12115
							15.4058	0.121728
							15.412	0.122457
							15.4181	0.123268
							15.4243	0.123835
							15.4304	0.124468
							15.4366	0.125072
							15.4427	0.12571
							15.4489	0.126327
							15.455	0.126958
							15.4611	0.127677
							15.4673	0.128367
							15.4734	0.129017
							15.4796	0.129668
							15.4857	0.130364
							15.4919	0.131008
							15.498	0.131742
							15.5041	0.13247
							15.5103	0.13324
							15.5164	0.13396
							15.5226	0.134753
							15.5287	0.135514
							15.5349	0.136347
							15.541	0.137132
							15.5472	0.137897
							15.5533	0.138738
							15.5594	0.139508
							15.5656	0.140385
							15.5717	0.141218
							15.5779	0.14215
							15.584	0.143023
							15.5902	0.144008
							15.5963	0.144924
							15.6024	0.145947
							15.6086	0.146949
							15.6147	0.147997
							15.6209	0.148979
							15.627	0.150035
							15.6332	0.151046
							15.6393	0.152176
							15.6454	0.1533
							15.6516	0.154424
							15.6577	0.155674
							15.6639	0.156936
							15.67	0.158202
							15.6762	0.159508
							15.6823	0.16092
							15.6885	0.162228
							15.6946	0.163637
							15.7007	0.164995
							15.7069	0.166512
							15.713	0.167976
							15.7192	0.169601
							15.7253	0.171191
							15.7315	0.172927
							15.7376	0.174658
							15.7437	0.176434
							15.7499	0.178423
							15.756	0.180262
							15.7622	0.182295
							15.7683	0.184176
							15.7745	0.186255
							15.7806	0.18837
							15.7868	0.190747
							15.7929	0.19303
							15.799	0.195572
							15.8052	0.198047
							15.8113	0.200868
							15.8175	0.203676
							15.8236	0.206645
							15.8298	0.209511
							15.8359	0.212776
							15.842	0.215852
							15.8482	0.218969
							15.8543	0.22282
							15.8605	0.227075
							15.8666	0.230978
							15.8728	0.234705
							15.8789	0.238885
							15.885	0.243122
							15.8912	0.247707
							15.8973	0.252059
							15.9035	0.256709
							15.9096	0.261162
							15.9158	0.266265
							15.9219	0.271452
							15.9281	0.27695
[truncated: 899 more rows]

## Sheet: SEC-MALS QT12-OD
volume (mL)	Molar Mass 1	volume (mL)	Molar Mass 1	volume (mL)	Molar Mass 2	volume (mL)	Molar Mass 3	volume (mL)	Molar Mass 4		volume (mL)	RI
16.1033	23357.8	16.1033	23357.8	10.578	122188	9.67009	190449	8.85175	283346		1.65525	-0.000742263
16.1093	23280	16.1093	23280	10.584	121744	9.67607	189794	8.85773	281168		1.66139	-0.000716126
16.1153	23117.2	16.1153	23117.2	10.59	121429	9.68204	189429	8.8637	279726		1.66753	-0.000647314
16.1213	23007.1	16.1213	23007.1	10.596	121333	9.68801	189142	8.86967	278676		1.67367	-0.000571954
16.1272	22960.8	16.1272	22960.8	10.6019	121223	9.69399	188715	8.87564	277779		1.67981	-0.000569889
16.1332	22943.5	16.1332	22943.5	10.6079	120973	9.69996	188166	8.88162	276849		1.68595	-0.000574965
16.1392	22932.8	16.1392	22932.8	10.6139	120648	9.70593	187576	8.88759	275305		1.69209	-0.000580042
16.1452	22880.7	16.1452	22880.7	10.6198	120375	9.71191	187064	8.89356	273585		1.69823	-0.000619516
16.1511	22829.8	16.1511	22829.8	10.6258	120137	9.71788	186603	8.89954	272478		1.70437	-0.000622063
16.1571	22786.9	16.1571	22786.9	10.6318	119907	9.72385	186041	8.90551	271859		1.71051	-0.000606468
16.1631	22738.4	16.1631	22738.4	10.6378	119632	9.72983	185379	8.91148	271538		1.71665	-0.000586253
16.169	22696.5	16.169	22696.5	10.6437	119309	9.7358	184887	8.91746	271283		1.72279	-0.000572735
16.175	22637.8	16.175	22637.8	10.6497	119045	9.74177	184431	8.92343	270673		1.72893	-0.000552827
16.181	22559.2	16.181	22559.2	10.6557	118835	9.74775	183916	8.9294	269646		1.73507	-0.00049838
16.187	22494.6	16.187	22494.6	10.6617	118660	9.75372	183531	8.93538	268543		1.74121	-0.000430882
16.1929	22449.6	16.1929	22449.6	10.6676	118523	9.75969	183181	8.94135	267602		1.74735	-0.00041945
16.1989	22423.9	16.1989	22423.9	10.6736	118367	9.76567	182689	8.94732	266845		1.75349	-0.000423032
16.2049	22415.1	16.2049	22415.1	10.6796	118152	9.77164	182142	8.9533	265895		1.75963	-0.000426614
16.2109	22406.6	16.2109	22406.6	10.6856	117911	9.77761	181658	8.95927	264568		1.76577	-0.000481966
16.2168	22381.6	16.2168	22381.6	10.6915	117666	9.78359	181259	8.96524	263281		1.77191	-0.000486254
16.2228	22346.5	16.2228	22346.5	10.6975	117416	9.78956	180828	8.97122	262372		1.77805	-0.000429301
16.2288	22312.7	16.2288	22312.7	10.7035	117171	9.79553	180248	8.97719	261792		1.7842	-0.000396332
16.2348	22280.1	16.2348	22280.1	10.7094	116904	9.80151	179571	8.98316	261460		1.79034	-0.000390413
16.2407	22257.1	16.2407	22257.1	10.7154	116631	9.80748	178981	8.98914	261107		1.79648	-0.000375919
16.2467	22222.4	16.2467	22222.4	10.7214	116402	9.81345	178501	8.99511	260226		1.80262	-0.000355549
16.2527	22170.2	16.2527	22170.2	10.7274	116209	9.81943	178142	9.00108	258893		1.80876	-0.000284573
16.2586	22127.4	16.2586	22127.4	10.7333	116053	9.8254	177930	9.00706	257678		1.8149	-0.000245658
16.2646	22103.3	16.2646	22103.3	10.7393	115935	9.83137	177714	9.01303	256849		1.82104	-0.000228161
16.2706	22093.9	16.2706	22093.9	10.7453	115781	9.83735	177349	9.019	256215		1.82718	-0.000253014
16.2766	22094.1	16.2766	22094.1	10.7513	115574	9.84332	176901	9.02498	255369		1.83332	-0.000277867
16.2825	22087.7	16.2825	22087.7	10.7572	115374	9.84929	176474	9.03095	254242		1.83946	-0.000312239
16.2885	22066.3	16.2885	22066.3	10.7632	115214	9.85527	175960	9.03692	253231		1.8456	-0.000279702
16.2945	22036.5	16.2945	22036.5	10.7692	115082	9.86124	175395	9.0429	252525		1.85174	-0.000250582
16.3005	22008	16.3005	22008	10.7752	114911	9.86721	174760	9.04887	251973		1.85788	-0.000213791
16.3064	21979.8	16.3064	21979.8	10.7811	114692	9.87319	174082	9.05484	251673		1.86402	-0.000180967
16.3124	21952.2	16.3124	21952.2	10.7871	114456	9.87916	173550	9.06082	251335		1.87016	-0.000157927
16.3184	21918.1	16.3184	21918.1	10.7931	114257	9.88513	173120	9.06679	250574		1.8763	-9.12879e-05
16.3244	21880.1	16.3244	21880.1	10.799	114077	9.89111	172803	9.07276	249662		1.88244	-1.65569e-05
16.3303	21854.4	16.3303	21854.4	10.805	113935	9.89708	172493	9.07874	248966		1.88858	-7.57101e-06
16.3363	21840.4	16.3363	21840.4	10.811	113771	9.90305	172172	9.08471	248240		1.89472	-1.06213e-05
16.3423	21833.1	16.3423	21833.1	10.817	113579	9.90903	171600	9.09068	247466		1.90086	-1.36716e-05
16.3482	21829.3	16.3482	21829.3	10.8229	113378	9.915	170995	9.09666	246736		1.907	-7.74794e-05
16.3542	21818.6	16.3542	21818.6	10.8289	113239	9.92097	170489	9.10263	245846		1.91314	-9.01027e-05
16.3602	21800.1	16.3602	21800.1	10.8349	113100	9.92695	170096	9.1086	244893		1.91928	-5.94124e-05
16.3662	21779.3	16.3662	21779.3	10.8409	112927	9.93292	169735	9.11458	244234		1.92542	-4.29394e-05
16.3721	21758.7	16.3721	21758.7	10.8468	112719	9.93889	169283	9.12055	243808		1.93156	-2.29788e-05
16.3781	21739.6	16.3781	21739.6	10.8528	112493	9.94487	168882	9.12652	243437		1.93771	-2.21029e-05
16.3841	21718.6	16.3841	21718.6	10.8588	112281	9.95084	168466	9.1325	242911		1.94385	7.62058e-06
16.3901	21692.9	16.3901	21692.9	10.8648	112086	9.95681	168042	9.13847	242207		1.94999	8.85311e-05
16.396	21668.9	16.396	21668.9	10.8707	111926	9.96279	167799	9.14444	241455		1.95613	9.81971e-05
16.402	21650.4	16.402	21650.4	10.8767	111804	9.96876	167534	9.15042	240717		1.96227	9.9556e-05
16.408	21637.1	16.408	21637.1	10.8827	111660	9.97473	167105	9.15639	240059		1.96841	7.27022e-05
16.414	21626.7	16.414	21626.7	10.8886	111456			9.16236	239382		1.97455	4.58483e-05
16.4199	21617.2	16.4199	21617.2	10.8946	111241			9.16834	238667		1.98069	-7.97649e-06
16.4259	21604.5	16.4259	21604.5	10.9006	111053			9.17431	238195		1.98683	7.0625e-06
16.4319	21589.4	16.4319	21589.4	10.9066	110832			9.18028	237965		1.99297	2.47984e-05
16.4378	21573.8	16.4378	21573.8	10.9125	110619			9.18626	237761		1.99911	3.59509e-05
16.4438	21555.7	16.4438	21555.7	10.9185	110410			9.19223	237452		2.00525	4.92471e-05
16.4498	21537.7	16.4498	21537.7	10.9245	110218			9.1982	237008		2.01139	5.73128e-05
16.4558	21523.7	16.4558	21523.7	10.9305	110022			9.20418	236393		2.01753	0.000105831
16.4617	21513.5	16.4617	21513.5	10.9364	109858			9.21015	235693		2.02367	0.000133191
16.4677	21495	16.4677	21495	10.9424	109694			9.21612	234980		2.02981	0.000145093
16.4737	21473.4	16.4737	21473.4	10.9484	109524			9.2221	234349		2.03595	0.000132499
16.4797	21457.3	16.4797	21457.3	10.9544	109343			9.22807	233720		2.04209	0.000119904
16.4856	21440.6	16.4856	21440.6	10.9603	109137			9.23404	232993		2.04823	4.33004e-05
16.4916	21423	16.4916	21423	10.9663	108912			9.24002	232218		2.05437	1.36393e-05
16.4976	21405.6	16.4976	21405.6	10.9723	108687			9.24599	231533		2.06051	6.40013e-05
16.5036	21390.8	16.5036	21390.8	10.9782	108473			9.25196	230967		2.06665	7.94509e-05
16.5095	21376	16.5095	21376	10.9842	108265			9.25794	230513		2.07279	8.60945e-05
16.5155	21360.6	16.5155	21360.6	10.9902	108041			9.26391	230057		2.07893	9.27381e-05
16.5215	21345.1	16.5215	21345.1	10.9962	107801			9.26988	229496		2.08507	0.000115063
16.5274	21334.8	16.5274	21334.8	11.0021	107570			9.27586	228785		2.09122	0.000188976
16.5334	21327.5	16.5334	21327.5	11.0081	107392			9.28183	228065		2.09736	0.000209526
16.5394	21317.2	16.5394	21317.2	11.0141	107231			9.2878	227406		2.1035	0.000194682
16.5454	21301.5	16.5454	21301.5	11.0201	107067			9.29378	226768		2.10964	0.000179839
16.5513	21282.2	16.5513	21282.2	11.026	106869			9.29975	226274		2.11578	0.0001505
16.5573	21258.1	16.5573	21258.1	11.032	106614			9.30572	225802		2.12192	0.000107951
16.5633	21236.3	16.5633	21236.3	11.038	106326			9.3117	225188		2.12806	0.000136673
16.5693	21220.6	16.5693	21220.6	11.044	106063			9.31767	224481		2.1342	0.000163981
16.5752	21206.4	16.5752	21206.4	11.0499	105836			9.32364	223802		2.14034	0.000180933
16.5812	21193.6	16.5812	21193.6	11.0559	105614			9.32962	223322		2.14648	0.000191963
16.5872	21179.5	16.5872	21179.5	11.0619	105422			9.33559	222853		2.15262	0.000215121
16.5932	21164.7	16.5932	21164.7	11.0678	105225			9.34156	222342		2.15876	0.000275377
16.5991	21157.9	16.5991	21157.9	11.0738	104983						2.1649	0.000311233
16.6051	21155.5	16.6051	21155.5	11.0798	104735						2.17104	0.000327893
16.6111	21151.1	16.6111	21151.1	11.0858	104506						2.17718	0.000313866
16.617	21140.2	16.617	21140.2	11.0917	104254						2.18332	0.000299838
16.623	21118.6	16.623	21118.6	11.0977	103962						2.18946	0.000225827
16.629	21093.5	16.629	21093.5	11.1037	103653						2.1956	0.000207553
16.635	21075.1	16.635	21075.1	11.1097	103364						2.20174	0.000231138
16.6409	21066.8	16.6409	21066.8	11.1156	103127						2.20788	0.000234646
16.6469	21055.5	16.6469	21055.5	11.1216	102906						2.21402	0.00023455
16.6529	21040.6	16.6529	21040.6	11.1276	102661						2.22016	0.000234455
16.6589	21026.6	16.6589	21026.6	11.1336	102510						2.2263	0.000278418
16.6648	21014.9	16.6648	21014.9	11.1395	102396						2.23244	0.000342921
16.6708	21009.9	16.6708	21009.9	11.1455	102243						2.23858	0.000371281
16.6768	21009.7	16.6768	21009.7	11.1515	102074						2.24473	0.000357346
16.6828	21001.2	16.6828	21001.2								2.25087	0.000343412
16.6887	20987.3	16.6887	20987.3								2.25701	0.000313526
16.6947	20961.7	16.6947	20961.7								2.26315	0.000279393
16.7007	20926.9	16.7007	20926.9								2.26929	0.000314948
16.7066	20900.6	16.7066	20900.6								2.27543	0.000354086
16.7126	20885.7	16.7126	20885.7								2.28157	0.000359817
16.7186	20875.3	16.7186	20875.3								2.28771	0.000365547
16.7246	20860.8	16.7246	20860.8								2.29385	0.000382258
16.7305	20845.9	16.7305	20845.9								2.29999	0.000438933
16.7365	20840.2	16.7365	20840.2								2.30613	0.000452848
16.7425	20841.7	16.7425	20841.7								2.31227	0.000454914
16.7485	20836.7	16.7485	20836.7								2.31841	0.000426721
16.7544	20817.9	16.7544	20817.9								2.32455	0.000398527
16.7604	20793.6	16.7604	20793.6								2.33069	0.000343846
16.7664	20759.8	16.7664	20759.8								2.33683	0.000357132
16.7724	20723.5	16.7724	20723.5								2.34297	0.000388461
16.7783	20705.5	16.7783	20705.5								2.34911	0.000413681
16.7843	20699.9	16.7843	20699.9								2.35525	0.00042756
16.7903	20690	16.7903	20690								2.36139	0.000437573
16.7962	20674.5	16.7962	20674.5								2.36753	0.000484085
16.8022	20663.2	16.8022	20663.2								2.37367	0.000550451
16.8082	20659.1	16.8082	20659.1								2.37981	0.000544082
16.8142	20658.5	16.8142	20658.5								2.38595	0.000537713
16.8201	20651.1	16.8201	20651.1								2.39209	0.000515965
16.8261	20639.6	16.8261	20639.6								2.39824	0.000467098
16.8321	20621.8	16.8321	20621.8								2.40438	0.000469603
16.8381	20587.7	16.8381	20587.7								2.41052	0.000488302
16.844	20550.4	16.844	20550.4								2.41666	0.000492932
16.85	20523.3	16.85	20523.3								2.4228	0.000506062
16.856	20509.8	16.856	20509.8								2.42894	0.000509959
16.8619	20508.3	16.8619	20508.3								2.43508	0.000537908
16.8679	20504.7	16.8679	20504.7								2.44122	0.000619783
16.8739	20489.2	16.8739	20489.2								2.44736	0.00062385
16.8799	20484.4	16.8799	20484.4								2.4535	0.000620761
											2.45964	0.000617671
		10.578	122188								2.46578	0.000569996
		10.584	121744								2.47192	0.000553672
		10.59	121429								2.47806	0.000571894
		10.596	121333								2.4842	0.000623152
		10.6019	121223								2.49034	0.000648274
		10.6079	120973								2.49648	0.000673396
		10.6139	120648								2.50262	0.000675764
		10.6198	120375								2.50876	0.000761081
		10.6258	120137								2.5149	0.000850626
		10.6318	119907								2.52104	0.00084677
		10.6378	119632								2.52718	0.000842913
		10.6437	119309								2.53332	0.000824584
		10.6497	119045								2.53946	0.00076436
		10.6557	118835								2.5456	0.00077912
		10.6617	118660								2.55175	0.000840092
		10.6676	118523								2.55789	0.00088144
		10.6736	118367								2.56403	0.000906529
		10.6796	118152								2.57017	0.000921069
		10.6856	117911								2.57631	0.000954309
		10.6915	117666								2.58245	0.00103696
		10.6975	117416								2.58859	0.00106322
		10.7035	117171								2.59473	0.00106883
		10.7094	116904								2.60087	0.00104189
		10.7154	116631								2.60701	0.00101495
		10.7214	116402								2.61315	0.000990406
		10.7274	116209								2.61929	0.00100802
		10.7333	116053								2.62543	0.00104019
		10.7393	115935								2.63157	0.00104154
		10.7453	115781								2.63771	0.00104288
		10.7513	115574								2.64385	0.00104375
		10.7572	115374								2.64999	0.0010956
		10.7632	115214								2.65613	0.00109879
		10.7692	115082								2.66227	0.00109701
		10.7752	114911								2.66841	0.00109522
		10.7811	114692								2.67455	0.00101161
		10.7871	114456								2.68069	0.000968049
		10.7931	114257								2.68683	0.000971703
		10.799	114077								2.69297	0.000975356
		10.805	113935								2.69911	0.000978227
		10.811	113771								2.70526	0.000975057
		10.817	113579								2.7114	0.000971887
		10.8229	113378								2.71754	0.00100428
		10.8289	113239								2.72368	0.00105723
		10.8349	113100								2.72982	0.00104517
		10.8409	112927								2.73596	0.00103311
		10.8468	112719								2.7421	0.00100491
		10.8528	112493								2.74824	0.000934474
		10.8588	112281								2.75438	0.000917052
		10.8648	112086								2.76052	0.000921429
		10.8707	111926								2.76666	0.000923263
		10.8767	111804								2.7728	0.00092384
		10.8827	111660								2.77894	0.000924416
		10.8886	111456								2.78508	0.000936003
		10.8946	111241								2.79122	0.000979834
		10.9006	111053								2.79736	0.000993738
		10.9066	110832								2.8035	0.000991828
		10.9125	110619								2.80964	0.000989917
		10.9185	110410								2.81578	0.000895534
		10.9245	110218								2.82192	0.000839628
		10.9305	110022								2.82806	0.000847184
		10.9364	109858								2.8342	0.00084713
		10.9424	109694								2.84034	0.000845506
		10.9484	109524								2.84648	0.000843881
		10.9544	109343								2.85262	0.000852875
		10.9603	109137								2.85877	0.000886217
		10.9663	108912								2.86491	0.000882404
		10.9723	108687								2.87105	0.000878591
		10.9782	108473								2.87719	0.000865681
		10.9842	108265								2.88333	0.000810331
		10.9902	108041								2.88947	0.000670345
		10.9962	107801								2.89561	-0.000145298
		11.0021	107570								2.90175	-0.00139643
		11.0081	107392								2.90789	-0.00197051
		11.0141	107231								2.91403	-0.00191388
		11.0201	107067								2.92017	-0.00165709
		11.026	106869								2.92631	-0.00132054
		11.032	106614								2.93245	-0.000985016
		11.038	106326								2.93859	-0.000723461
		11.044	106063								2.94473	-0.000560932
		11.0499	105836								2.95087	-0.000444576
		11.0559	105614								2.95701	-0.000369042
		11.0619	105422								2.96315	-0.000321686
		11.0678	105225								2.96929	-0.000260359
		11.0738	104983								2.97543	-0.000182986
		11.0798	104735								2.98157	-0.000125107
		11.0858	104506								2.98771	-0.000104855
		11.0917	104254								2.99385	-6.88739e-05
		11.0977	103962								2.99999	7.42796e-06
		11.1037	103653								3.00613	4.02351e-05
		11.1097	103364								3.01228	5.38726e-05
		11.1156	103127								3.01842	3.46382e-05
		11.1216	102906								3.02456	1.54037e-05
		11.1276	102661								3.0307	-4.81894e-05
		11.1336	102510								3.03684	-7.67309e-05
		11.1395	102396								3.04298	-6.68609e-05
		11.1455	102243								3.04912	-7.14881e-05
		11.1515	102074								3.05526	-7.61154e-05
											3.0614	-8.56964e-05
		9.67009	190449								3.06754	-8.1219e-05
		9.67607	189794								3.07368	-2.93782e-05
		9.68204	189429								3.07982	-2.64597e-05
		9.68801	189142								3.08596	-2.84717e-05
		9.69399	188715								3.0921	-3.04836e-05
		9.69996	188166								3.09824	-0.000100191
		9.70593	187576								3.10438	-0.00014915
		9.71191	187064								3.11052	-0.000114209
		9.71788	186603								3.11666	-7.10764e-05
		9.72385	186041								3.1228	-7.05551e-05
		9.72983	185379								3.12894	-7.00338e-05
		9.7358	184887								3.13508	-6.96596e-05
		9.74177	184431								3.14122	4.30339e-07
		9.74775	183916								3.14736	6.54958e-06
		9.75372	183531								3.1535	5.13089e-06
		9.75969	183181								3.15964	3.7122e-06
		9.76567	182689								3.16579	-7.59929e-05
		9.77164	182142								3.17193	-0.000136302
		9.77761	181658								3.17807	-0.000144446
		9.78359	181259								3.18421	-0.000149906
		9.78956	180828								3.19035	-0.000142142
		9.79553	180248								3.19649	-0.000139681
		9.80151	179571								3.20263	-0.000137221
		9.80748	178981								3.20877	-9.63104e-05
		9.81345	178501								3.21491	-6.8035e-05
		9.81943	178142								3.22105	-5.74378e-05
		9.8254	177930								3.22719	-8.20978e-05
		9.83137	177714								3.23333	-0.000106758
		9.83735	177349								3.23947	-0.000173066
		9.84332	176901								3.24561	-0.000192466
		9.84929	176474								3.25175	-0.000159968
		9.85527	175960								3.25789	-0.000152589
		9.86124	175395								3.26403	-0.00015122
		9.86721	174760								3.27017	-0.000146937
		9.87319	174082								3.27631	-0.000122805
		9.87916	173550								3.28245	-6.86722e-05
		9.88513	173120								3.28859	-6.55415e-05
		9.89111	172803								3.29473	-7.7258e-05
		9.89708	172493								3.30087	-8.89745e-05
		9.90305	172172								3.30701	-0.000189187
		9.90903	171600								3.31315	-0.000240654
		9.915	170995								3.3193	-0.000253113
		9.92097	170489								3.32544	-0.000255209
		9.92695	170096								3.33158	-0.00025737
		9.93292	169735								3.33772	-0.000259531
		9.93889	169283								3.34386	-0.000261174
		9.94487	168882								3.35	-0.000226087
		9.95084	168466								3.35614	-0.000189145
		9.95681	168042								3.36228	-0.000198802
		9.96279	167799								3.36842	-0.000208459
		9.96876	167534								3.37456	-0.000232699
		9.97473	167105								3.3807	-0.000292722
											3.38684	-0.000281934
		8.85175	283346								3.39298	-0.000252202
		8.85773	281168								3.39912	-0.000227023
		8.8637	279726								3.40526	-0.000201982
		8.86967	278676								3.4114	-0.000182265
		8.87564	277779								3.41754	-0.000117488
		8.88162	276849								3.42368	-2.86956e-05
		8.88759	275305								3.42982	2.10635e-05
		8.89356	273585								3.43596	8.93726e-06
		8.89954	272478								3.4421	-3.18897e-06
		8.90551	271859								3.44824	-3.03806e-05
		8.91148	271538								3.45438	-2.41329e-05
		8.91746	271283								3.46052	2.71565e-05
		8.92343	270673								3.46666	7.77605e-05
		8.9294	269646								3.47281	0.000116612
		8.93538	268543								3.47895	0.00013129
		8.94135	267602								3.48509	0.000182162
		8.94732	266845								3.49123	0.000265016
		8.9533	265895								3.49737	0.000331248
		8.95927	264568								3.50351	0.000326865
		8.96524	263281								3.50965	0.000322482
		8.97122	262372								3.51579	0.00030865
		8.97719	261792								3.52193	0.000268497
		8.98316	261460								3.52807	0.00030206
		8.98914	261107								3.53421	0.000345523
		8.99511	260226								3.54035	0.000376371
		9.00108	258893								3.54649	0.000379007
		9.00706	257678								3.55263	0.000381643
		9.01303	256849								3.55877	0.000443579
		9.019	256215								3.56491	0.000536703
		9.02498	255369								3.57105	0.000562691
		9.03095	254242								3.57719	0.000574962
		9.03692	253231								3.58333	0.000549604
		9.0429	252525								3.58947	0.000524246
		9.04887	251973								3.59561	0.000530066
		9.05484	251673								3.60175	0.000566674
		9.06082	251335								3.60789	0.000610936
		9.06679	250574								3.61403	0.000647063
		9.07276	249662								3.62017	0.000665954
		9.07874	248966								3.62632	0.000714596
		9.08471	248240								3.63246	0.000812104
		9.09068	247466								3.6386	0.000889806
		9.09666	246736								3.64474	0.000894686
		9.10263	245846								3.65088	0.000887156
		9.1086	244893								3.65702	0.000879626
		9.11458	244234								3.66316	0.000838148
		9.12055	243808								3.6693	0.000887854
		9.12652	243437								3.67544	0.000952742
		9.1325	242911								3.68158	0.000991217
		9.13847	242207								3.68772	0.00100683
		9.14444	241455								3.69386	0.0010291
		9.15042	240717								3.7	0.0011135
		9.15639	240059								3.70614	0.00118892
		9.16236	239382								3.71228	0.0011901
		9.16834	238667								3.71842	0.00118203
		9.17431	238195								3.72456	0.00117397
		9.18028	237965								3.7307	0.00111592
		9.18626	237761								3.73684	0.00110445
		9.19223	237452								3.74298	0.00113246
		9.1982	237008								3.74912	0.00115962
		9.20418	236393								3.75526	0.00116308
		9.21015	235693								3.7614	0.00116653
		9.21612	234980								3.76754	0.00118584
		9.2221	234349								3.77368	0.00126827
		9.22807	233720								3.77983	0.00127649
		9.23404	232993								3.78597	0.00127934
		9.24002	232218								3.79211	0.00126061
		9.24599	231533								3.79825	0.00124188
		9.25196	230967								3.80439	0.00121798
		9.25794	230513								3.81053	0.0012309
		9.26391	230057								3.81667	0.00126157
		9.26988	229496								3.82281	0.00128297
		9.27586	228785								3.82895	0.00130437
		9.28183	228065								3.83509	0.00133296
		9.2878	227406								3.84123	0.00143688
		9.29378	226768								3.84737	0.00148777
		9.29975	226274								3.85351	0.00147683
		9.30572	225802								3.85965	0.00146589
		9.3117	225188								3.86579	0.00144118
		9.31767	224481								3.87193	0.0013916
		9.32364	223802								3.87807	0.00139036
		9.32962	223322								3.88421	0.0014086
		9.33559	222853								3.89035	0.00144006
		9.34156	222342								3.89649	0.0014443
											3.90263	0.00144853
											3.90877	0.00148466
											3.91491	0.00156517
											3.92105	0.0015695
											3.92719	0.00156412
											3.93334	0.00155874
											3.93948	0.00147653
											3.94562	0.00146102
											3.95176	0.00148614
											3.9579	0.00152046
											3.96404	0.00155589
											3.97018	0.0015642
											3.97632	0.00158186
											3.98246	0.00163267
											3.9886	0.00164949
											3.99474	0.0016514
											4.00088	0.00161854
											4.00702	0.00158569
											4.01316	0.00153591
											4.0193	0.0014965
											4.02544	0.00150526
											4.03158	0.00152466
											4.03772	0.00153151
											4.04386	0.00153836
											4.05	0.00157131
											4.05614	0.00164881
											4.06228	0.00164078
											4.06842	0.00163274
											4.07456	0.00161243
											4.0807	0.00155185
											4.08685	0.00153493
											4.09299	0.00154601
											4.09913	0.00157202
											4.10527	0.00159565
											4.11141	0.00160966
											4.11755	0.00164323
											4.12369	0.00171008
											4.12983	0.00171051
											4.13597	0.00170031
											4.14211	0.00169011
											4.14825	0.00159808
											4.15439	0.00154436
											4.16053	0.00156679
											4.16667	0.00158088
											4.17281	0.00157633
											4.17895	0.00157177
											4.18509	0.00156165
											4.19123	0.00159831
											4.19737	0.00161606
											4.20351	0.00161808
											4.20965	0.00157797
											4.21579	0.00153785
											4.22193	0.00146635
											4.22807	0.00143509
											4.23421	0.00142531
											4.24036	0.00142269
											4.2465	0.00142007
											4.25264	0.00139099
											4.25878	0.00139719
											4.26492	0.00142851
											4.27106	0.00141623
											4.2772	0.00140394
											4.28334	0.00137831
											4.28948	0.0012879
											4.29562	0.00123389
											4.30176	0.00123963
											4.3079	0.00125377
											4.31404	0.00126419
											4.32018	0.00126955
											4.32632	0.00130133
											4.33246	0.00137038
											4.3386	0.00139923
											4.34474	0.00141269
											4.35088	0.00139531
											4.35702	0.00137793
											4.36316	0.00133242
											4.3693	0.00134189
											4.37544	0.00138763
											4.38158	0.00142167
											4.38772	0.00142225
											4.39387	0.00142283
											4.40001	0.00147643
											4.40615	0.00154354
											4.41229	0.00153119
											4.41843	0.00151884
											4.42457	0.00149059
											4.43071	0.00141551
											4.43685	0.00138874
											4.44299	0.00139902
											4.44913	0.00140383
											4.45527	0.00140464
											4.46141	0.00140546
											4.46755	0.00143548
											4.47369	0.00147604
											4.47983	0.00148214
											4.48597	0.00147897
											4.49211	0.0014758
											4.49825	0.00138666
											4.50439	0.00131767
											4.51053	0.00132833
											4.51667	0.00134064
											4.52281	0.00134344
											4.52895	0.00133317
											4.53509	0.0013229
											4.54123	0.00136131
											4.54738	0.00139016
											4.55352	0.00139945
											4.55966	0.00136981
											4.5658	0.00134017
											4.57194	0.00126787
											4.57808	0.00124408
											4.58422	0.00126158
											4.59036	0.00130152
											4.5965	0.00131149
											4.60264	0.00132146
											4.60878	0.00136445
											4.61492	0.00144247
											4.62106	0.00145543
											4.6272	0.0014526
											4.63334	0.00144978
											4.63948	0.00140082
											4.64562	0.00137571
											4.65176	0.00139038
											4.6579	0.00142327
											4.66404	0.00145899
											4.67018	0.00146144
											4.67632	0.00148271
											4.68246	0.00157496
											4.6886	0.00160803
											4.69474	0.00161902
											4.70089	0.00160425
											4.70703	0.00158949
											4.71317	0.0015379
											4.71931	0.00152683
											4.72545	0.00153978
											4.73159	0.00156848
											4.73773	0.00157768
											4.74387	0.00158687
											4.75001	0.00161623
											4.75615	0.00169798
											4.76229	0.00169637
											4.76843	0.00169475
											4.77457	0.00167825
											4.78071	0.0016095
											4.78685	0.00161319
											4.79299	0.00164087
											4.79913	0.00166358
											4.80527	0.00170948
											4.81141	0.00171842
											4.81755	0.00173672
											4.82369	0.00181888
											4.82983	0.00184494
											4.83597	0.00185465
											4.84211	0.00183258
											4.84825	0.00181051
											4.8544	0.00178234
											4.86054	0.00178316
											4.86668	0.00180241
											4.87282	0.00181078
											4.87896	0.00181914
											4.8851	0.00182348
											4.89124	0.00188307
											4.89738	0.00192011
											4.90352	0.0019338
											4.90966	0.00190924
											4.9158	0.00188468
											4.92194	0.00182523
											4.92808	0.00182672
											4.93422	0.00185599
											4.94036	0.00186051
											4.9465	0.0018614
											4.95264	0.0018623
											4.95878	0.00187787
											4.96492	0.0019602
											4.97106	0.00195661
											4.9772	0.00195302
											4.98334	0.00193498
											4.98948	0.00186616
											4.99562	0.00181262
											5.00177	0.00181983
											5.00791	0.00184174
											5.01405	0.00184219
											5.02019	0.00183969
											5.02633	0.0018372
											5.03247	0.0018868
											5.03861	0.00192029
											5.04475	0.00193575
											5.05089	0.00189578
											5.05703	0.00185581
											5.06317	0.00179255
											5.06931	0.00179828
											5.07545	0.00181786
											5.08159	0.00181641
											5.08773	0.00181496
											5.09387	0.00180411
											5.10001	0.00182495
											5.10615	0.00185034
											5.11229	0.00186187
											5.11843	0.00183765
											5.12457	0.00181343
											5.13071	0.00171463
											5.13685	0.00165442
											5.14299	0.00164014
											5.14913	0.00163512
											5.15528	0.00163009
											5.16142	0.00161532
											5.16756	0.00160744
											5.1737	0.00161767
											5.17984	0.00161854
											5.18598	0.00159304
											5.19212	0.00156753
											5.19826	0.00146971
											5.2044	0.00139396
											5.21054	0.00138704
											5.21668	0.00138217
											5.22282	0.0013773
											5.22896	0.00134831
											5.2351	0.00133449
											5.24124	0.00135208
											5.24738	0.00134705
											5.25352	0.00134202
											5.25966	0.0013231
											5.2658	0.00123929
											5.27194	0.00112616
											5.27808	0.00105056
											5.28422	0.00103507
											5.29036	0.0010117
											5.2965	0.000971439
											5.30264	0.000930442
											5.30879	0.000910428
											5.31493	0.000901344
											5.32107	0.000892261
											5.32721	0.000869646
											5.33335	0.000782746
											5.33949	0.000671171
											5.34563	0.000571445
											5.35177	0.000536657
											5.35791	0.000535287
											5.36405	0.00050725
											5.37019	0.000453105
											5.37633	0.000424737
											5.38247	0.000419725
											5.38861	0.000414712
											5.39475	0.000402402
											5.40089	0.000337316
											5.40703	0.000255215
											5.41317	0.00013474
											5.41931	7.9309e-05
											5.42545	7.44527e-05
											5.43159	6.95963e-05
											5.43773	3.54467e-05
											5.44387	1.22111e-05
											5.45001	3.434e-05
											5.45615	4.15372e-05
											5.4623	3.7367e-05
											5.46844	3.31968e-05
											5.47458	-4.18196e-05
											5.48072	-0.000144844
											5.48686	-0.00023226
											5.493	-0.000243109
											5.49914	-0.000253496
											5.50528	-0.000263883
											5.51142	-0.000289856
											5.51756	-0.000320676
											5.5237	-0.000291438
											5.52984	-0.00028092
											5.53598	-0.000289741
											5.54212	-0.000298562
											5.54826	-0.000396159
											5.5544	-0.000507985
											5.56054	-0.000541455
											5.56668	-0.000547233
											5.57282	-0.000553011
											5.57896	-0.000567279
											5.5851	-0.000612199
											5.59124	-0.000594757
											5.59738	-0.000593208
											5.60352	-0.000600326
											5.60966	-0.000607443
											5.61581	-0.000679438
											5.62195	-0.000783476
											5.62809	-0.000851484
											5.63423	-0.000880666
											5.64037	-0.000883753
											5.64651	-0.000915294
											5.65265	-0.000946835
											5.65879	-0.000979822
											5.66493	-0.000960803
											5.67107	-0.000958009
											5.67721	-0.000991901
											5.68335	-0.00102579
											5.68949	-0.00111823
											5.69563	-0.00118547
											5.70177	-0.00120539
											5.70791	-0.0012111
											5.71405	-0.00121255
											5.72019	-0.001214
											5.72633	-0.00123813
											5.73247	-0.00121076
											5.73861	-0.00120751
											5.74475	-0.00121094
											5.75089	-0.00121437
											5.75703	-0.00129741
											5.76317	-0.00138728
											5.76932	-0.00141716
											5.77546	-0.0014204
											5.7816	-0.00142234
											5.78774	-0.00143494
											5.79388	-0.00144754
											5.80002	-0.00145198
											5.80616	-0.00139643
											5.8123	-0.0013994
											5.81844	-0.00140236
											5.82458	-0.00141991
											5.83072	-0.00151211
											5.83686	-0.00155832
											5.843	-0.00153875
											5.84914	-0.00153128
											5.85528	-0.00152368
											5.86142	-0.00151607
											5.86756	-0.00150389
											5.8737	-0.00142962
											5.87984	-0.00140192
											5.88598	-0.0013969
											5.89212	-0.00142881
											5.89826	-0.00146072
											5.9044	-0.00153094
											5.91054	-0.00152956
											5.91668	-0.00150721
											5.92283	-0.0015045
											5.92897	-0.0015034
											5.93511	-0.0015023
											5.94125	-0.00147574
											5.94739	-0.00143404
											5.95353	-0.00143238
											5.95967	-0.00144317
											5.96581	-0.00145396
											5.97195	-0.00154091
											5.97809	-0.00157324
											5.98423	-0.00155562
											5.99037	-0.00152034
											5.99651	-0.00151552
											6.00265	-0.0015107
											6.00879	-0.00148597
											6.01493	-0.00142914
											6.02107	-0.00135781
											6.02721	-0.00137396
											6.03335	-0.00139011
											6.03949	-0.00142304
											6.04563	-0.00148635
											6.05177	-0.00148064
											6.05791	-0.00143836
											6.06405	-0.00141064
											6.07019	-0.00140029
											6.07634	-0.00139565
											6.08248	-0.00135084
											6.08862	-0.00128572
											6.09476	-0.00128446
											6.1009	-0.00129649
											6.10704	-0.00130852
											6.11318	-0.00139123
											6.11932	-0.00141496
											6.12546	-0.00139938
											6.1316	-0.00135486
											6.13774	-0.00134793
											6.14388	-0.001341
											6.15002	-0.00131744
											6.15616	-0.0012445
											6.1623	-0.00122258
											6.16844	-0.00121284
											6.17458	-0.00123426
											6.18072	-0.00125567
											6.18686	-0.00129941
											6.193	-0.00126922
											6.19914	-0.00124631
											6.20528	-0.0012374
											6.21142	-0.00123482
											6.21756	-0.00123225
											6.2237	-0.00116067
											6.22985	-0.00114239
											6.23599	-0.00115025
											6.24213	-0.00115811
											6.24827	-0.00117734
											6.25441	-0.00124815
											6.26055	-0.00127095
											6.26669	-0.00122885
											6.27283	-0.00120344
											6.27897	-0.0011958
											6.28511	-0.00116433
											6.29125	-0.00111348
											6.29739	-0.00105187
											6.30353	-0.00105195
											6.30967	-0.00105781
											6.31581	-0.00106367
											6.32195	-0.00114083
											6.32809	-0.00117886
											6.33423	-0.001153
											6.34037	-0.00112089
											6.34651	-0.00110573
											6.35265	-0.00109425
											6.35879	-0.001069
											6.36493	-0.00101289
											6.37107	-0.000984452
											6.37721	-0.00100078
											6.38336	-0.00101711
											6.3895	-0.00105356
											6.39564	-0.00114443
											6.40178	-0.00115295
											6.40792	-0.00114901
											6.41406	-0.00114887
											6.4202	-0.00116074
											6.42634	-0.00117261
											6.43248	-0.00113059
											6.43862	-0.00109153
											6.44476	-0.00107821
											6.4509	-0.00108918
											6.45704	-0.00110016
											6.46318	-0.00116177
											6.46932	-0.00119242
											6.47546	-0.00115592
											6.4816	-0.00110553
											6.48774	-0.00109826
											6.49388	-0.00109098
											6.50002	-0.0010676
											6.50616	-0.000977796
											6.5123	-0.000947852
											6.51844	-0.000941998
											6.52458	-0.000970834
											6.53072	-0.00099967
											6.53687	-0.00104721
											6.54301	-0.00103722
											6.54915	-0.00100634
											6.55529	-0.000986463
											6.56143	-0.000972049
											6.56757	-0.000965285
											6.57371	-0.000895319
											6.57985	-0.000811304
											6.58599	-0.000811811
											6.59213	-0.000812318
											6.59827	-0.000840336
											6.60441	-0.000902639
											6.61055	-0.000887774
											6.61669	-0.00084004
											6.62283	-0.000808751
											6.62897	-0.00079416
											6.63511	-0.000791901
											6.64125	-0.000751128
											6.64739	-0.000649978
											6.65353	-0.000625069
											6.65967	-0.000630172
											6.66581	-0.000635275
											6.67195	-0.000652241
											6.67809	-0.000671971
											6.68423	-0.000625768
											6.69038	-0.000577708
											6.69652	-0.00055271
											6.70266	-0.000532289
											6.7088	-0.000506311
											6.71494	-0.000423157
											6.72108	-0.000333409
											6.72722	-0.000315391
											6.73336	-0.000310993
											6.7395	-0.000331151
											6.74564	-0.000351309
											6.75178	-0.000336226
											6.75792	-0.000275686
											6.76406	-0.000227984
											6.7702	-0.000183911
											6.77634	-0.000149211
											6.78248	-8.20711e-05
											6.78862	2.07171e-05
											6.79476	3.67368e-05
											6.8009	3.85155e-05
											6.80704	1.71317e-05
											6.81318	-4.25205e-06
											6.81932	1.21692e-06
											6.82546	6.61353e-05
											6.8316	0.000126244
											6.83774	0.000141305
											6.84389	0.000176881
											6.85003	0.000228051
											6.85617	0.000311192
											6.86231	0.000393906
											6.86845	0.000398334
											6.87459	0.000392057
											6.88073	0.00038578
											6.88687	0.000347477
											6.89301	0.000371076
											6.89915	0.000457468
											6.90529	0.000527891
											6.91143	0.000538696
											6.91757	0.000590624
											6.92371	0.000669055
											6.92985	0.000744026
											6.93599	0.000787797
											6.94213	0.000809396
											6.94827	0.000800076
											6.95441	0.000790757
											6.96055	0.000810279
											6.96669	0.000860178
											6.97283	0.000919099
											6.97897	0.000956089
											6.98511	0.000968821
											6.99125	0.00103409
											6.9974	0.00113482
											7.00354	0.00120663
											7.00968	0.00121673
											7.01582	0.00120828
											7.02196	0.00119983
											7.0281	0.0011559
											7.03424	0.00118156
											7.04038	0.00123723
											7.04652	0.00127227
											7.05266	0.0012774
											7.0588	0.00131218
											7.06494	0.00139679
											7.07108	0.00147238
											7.07722	0.0014742
											7.08336	0.00146641
											7.0895	0.00145861
											7.09564	0.00140522
											7.10178	0.00141003
											7.10792	0.00146088
											7.11406	0.00150819
											7.1202	0.00153223
											7.12634	0.0015461
											7.13248	0.00161346
											7.13862	0.00169859
											7.14476	0.00174829
											7.15091	0.00173442
											7.15705	0.00172056
											7.16319	0.00168959
											7.16933	0.00166407
											7.17547	0.00171151
											7.18161	0.00174044
											7.18775	0.00175433
											7.19389	0.00176821
											7.20003	0.00180467
											7.20617	0.00187753
											7.21231	0.00189394
											7.21845	0.00189764
											7.22459	0.00186512
											7.23073	0.0018326
											7.23687	0.0017794
											7.24301	0.00177194
											7.24915	0.00178666
											7.25529	0.00179443
											7.26143	0.00180219
											7.26757	0.00180342
											7.27371	0.00185451
											7.27985	0.00187603
											7.28599	0.00188392
											7.29213	0.00185761
											7.29827	0.0018313
											7.30442	0.00175842
											7.31056	0.00172165
											7.3167	0.00172197
											7.32284	0.00172486
											7.32898	0.00171901
											7.33512	0.00171317
											7.34126	0.00171466
											7.3474	0.0017903
											7.35354	0.00178933
											7.35968	0.00178836
											7.36582	0.00177201
											7.37196	0.00168516
											7.3781	0.00162567
											7.38424	0.00164521
											7.39038	0.00167109
											7.39652	0.00168701
											7.40266	0.00170326
											7.4088	0.00171202
											7.41494	0.00178119
											7.42108	0.00186004
											7.42722	0.00184623
											7.43336	0.00183242
											7.4395	0.00180501
											7.44564	0.00174505
											7.45178	0.00171761
											7.45793	0.00175337
											7.46407	0.00176107
											7.47021	0.00176348
											7.47635	0.00176588
											7.48249	0.00177026
											7.48863	0.00184994
											7.49477	0.0018503
											7.50091	0.00184203
											7.50705	0.00183376
											7.51319	0.00175044
											7.51933	0.00167949
											7.52547	0.00166487
											7.53161	0.00165773
											7.53775	0.00165059
											7.54389	0.00163629
											7.55003	0.00162945
											7.55617	0.00167125
											7.56231	0.00166141
											7.56845	0.00165158
											7.57459	0.00162283
											7.58073	0.00153886
											7.58687	0.00148556
											7.59301	0.00147702
											7.59915	0.00147762
											7.60529	0.00146945
											7.61144	0.00146127
											7.61758	0.0014366
											7.62372	0.00147334
											7.62986	0.00150203
											7.636	0.00150933
											7.64214	0.00147748
											7.64828	0.00144563
											7.65442	0.001339
											7.66056	0.00129311
											7.6667	0.00128714
											7.67284	0.00128458
											7.67898	0.00128272
											7.68512	0.00124698
											7.69126	0.00123572
											7.6974	0.0012892
											7.70354	0.00128397
											7.70968	0.00127874
											7.71582	0.00125981
											7.72196	0.00116226
											7.7281	0.00108471
											7.73424	0.00108495
											7.74038	0.00108384
											7.74652	0.00108273
											7.75266	0.00107737
											7.7588	0.00106248
											7.76495	0.00111174
											7.77109	0.00113304
											7.77723	0.00111533
											7.78337	0.00109762
											7.78951	0.0010623
											7.79565	0.000992644
											7.80179	0.000986032
											7.80793	0.000977116
											7.81407	0.000975605
											7.82021	0.00096925
											7.82635	0.000962895
											7.83249	0.000977042
											7.83863	0.00101942
											7.84477	0.00101427
											7.85091	0.00100912
											7.85705	0.000990664
											7.86319	0.00090475
											7.86933	0.000869642
											7.87547	0.00088157
											7.88161	0.000906038
											7.88775	0.000908823
											7.89389	0.000911608
											7.90003	0.000945712
											7.90617	0.00101846
											7.91231	0.0010476
											7.91846	0.00105991
											7.9246	0.00103094
											7.93074	0.00100198
											7.93688	0.000938476
											7.94302	0.000946241
											7.94916	0.000988975
											7.9553	0.00103052
											7.96144	0.00104026
											7.96758	0.00105
											7.97372	0.0011039
											7.97986	0.00119483
											7.986	0.0012034
											7.99214	0.00120662
											7.99828	0.0011835
											8.00442	0.00116038
											8.01056	0.00114023
											8.0167	0.0011742
											8.02284	0.00121854
											8.02898	0.00128028
											8.03512	0.00132115
											8.04126	0.00137786
											8.0474	0.00150717
											8.05354	0.00162619
											8.05968	0.00167418
											8.06582	0.00167298
											8.07197	0.00167177
											8.07811	0.00165959
											8.08425	0.00171734
											8.09039	0.00184116
											8.09653	0.00194182
											8.10267	0.00200594
											8.10881	0.00207824
											8.11495	0.0021912
											8.12109	0.00235693
											8.12723	0.00247664
											8.13337	0.00252803
											8.13951	0.00257434
											8.14565	0.00261632
											8.15179	0.00268855
											8.15793	0.00281149
											8.16407	0.00297362
											8.17021	0.00310537
											8.17635	0.0032055
											8.18249	0.00337616
											8.18863	0.00358793
											8.19477	0.00378377
											8.20091	0.00393105
											8.20705	0.00401432
											8.21319	0.00408667
											8.21933	0.00418439
											8.22548	0.00433875
											8.23162	0.00453718
											8.23776	0.00473674
											8.2439	0.00490418
											8.25004	0.00507412
											8.25618	0.00532582
											8.26232	0.0055995
											8.26846	0.00579744
											8.2746	0.00597294
											8.28074	0.0061104
											8.28688	0.00623867
											8.29302	0.00644387
											8.29916	0.00669519
											8.3053	0.00697012
											8.31144	0.00722646
											8.31758	0.00745466
											8.32372	0.00774986
											8.32986	0.00812233
											8.336	0.00846123
											8.34214	0.00871203
											8.34828	0.00891997
											8.35442	0.0090953
											8.36056	0.00932459
											8.3667	0.00965129
											8.37284	0.00998855
											8.37899	0.0103056
											8.38513	0.0105778
											8.39127	0.0108907
											8.39741	0.0113059
											8.40355	0.011726
											8.40969	0.0120648
											8.41583	0.0123535
											8.42197	0.0125961
											8.42811	0.0128393
											8.43425	0.0132121
											8.44039	0.0136308
											8.44653	0.0140365
											8.45267	0.014424
											8.45881	0.014792
											8.46495	0.0152671
											8.47109	0.015844
											8.47723	0.0163617
											8.48337	0.016785
											8.48951	0.0171555
											8.49565	0.0174995
											8.50179	0.0179276
											8.50793	0.0184663
											8.51407	0.0190404
											8.52021	0.0196334
											8.52635	0.0201985
											8.5325	0.0208252
											8.53864	0.0216309
											8.54478	0.0224347
											8.55092	0.0231265
											8.55706	0.0237659
											8.5632	0.0243708
											8.56934	0.025007
											8.57548	0.0258165
											8.58162	0.0267318
											8.58776	0.0276365
											8.5939	0.0285275
											8.60004	0.0294677
											8.60618	0.0305866
											8.61232	0.0318222
											8.61846	0.0329737
											8.6246	0.0340275
											8.63074	0.0350382
											8.63688	0.0360305
											8.64302	0.0372045
											8.64916	0.0385692
											8.6553	0.0399197
											8.66144	0.0412655
											8.66758	0.0426322
											8.67372	0.0441424
											8.67986	0.0458854
											8.68601	0.0475795
											8.69215	0.0490955
											8.69829	0.0505809
											8.70443	0.0519958
											8.71057	0.0534652
											8.71671	0.0552025
											8.72285	0.0570215
											8.72899	0.0588232
											8.73513	0.060609
											8.74127	0.0624277
											8.74741	0.0645169
											8.75355	0.0666958
											8.75969	0.0686407
											8.76583	0.0704672
											8.77197	0.0722147
											8.77811	0.0738945
											8.78425	0.0757935
											8.79039	0.077887
											8.79653	0.0799516
											8.80267	0.081972
											8.80881	0.0841971
											8.81495	0.0866425
											8.82109	0.0890711
											8.82723	0.0912794
											8.83337	0.0931951
											8.83952	0.0949998
											8.84566	0.0966446
											8.8518	0.0986601
											8.85794	0.101049
											8.86408	0.103128
											8.87022	0.105013
											8.87636	0.106813
											8.8825	0.108644
											8.88864	0.11074
											8.89478	0.112809
											8.90092	0.114516
											8.90706	0.116035
											8.9132	0.117402
											8.91934	0.118699
											8.92548	0.120231
											8.93162	0.12189
											8.93776	0.123437
											8.9439	0.124818
											8.95004	0.126067
											8.95618	0.127498
											8.96232	0.129054
											8.96846	0.130357
											8.9746	0.131404
											8.98074	0.132249
											8.98688	0.132914
											8.99303	0.133772
											8.99917	0.13495
											9.00531	0.136088
											9.01145	0.136968
											9.01759	0.137611
											9.02373	0.138277
											9.02987	0.139093
											9.03601	0.139772
											9.04215	0.140177
											9.04829	0.140445
											9.05443	0.140519
											9.06057	0.140573
											9.06671	0.140816
											9.07285	0.141065
											9.07899	0.141129
											9.08513	0.141152
											9.09127	0.141176
											9.09741	0.141173
											9.10355	0.14117
											9.10969	0.141113
											9.11583	0.140813
											9.12197	0.140388
											9.12811	0.139873
											9.13425	0.139427
											9.14039	0.139053
											9.14654	0.138626
											9.15268	0.138118
											9.15882	0.137538
											9.16496	0.136986
											9.1711	0.136417
											9.17724	0.135577
											9.18338	0.134613
											9.18952	0.133736
											9.19566	0.132838
											9.2018	0.131962
											9.20794	0.131171
											9.21408	0.130389
											9.22022	0.129555
											9.22636	0.128666
											9.2325	0.127773
											9.23864	0.126939
											9.24478	0.126091
											9.25092	0.125158
											9.25706	0.124169
											9.2632	0.123129
											9.26934	0.122094
											9.27548	0.121116
											9.28162	0.120172
											9.28776	0.119227
											9.2939	0.118257
											9.30005	0.11726
											9.30619	0.116304
											9.31233	0.115375
											9.31847	0.114427
											9.32461	0.113456
											9.33075	0.112427
											9.33689	0.111393
											9.34303	0.110411
											9.34917	0.109476
											9.35531	0.108583
											9.36145	0.107687
											9.36759	0.106759
											9.37373	0.105858
											9.37987	0.105019
											9.38601	0.104198
											9.39215	0.103344
											9.39829	0.102458
											9.40443	0.10158
											9.41057	0.100736
											9.41671	0.0998587
											9.42285	0.0988815
											9.42899	0.0978605
											9.43513	0.096979
											9.44127	0.0962447
											9.44741	0.0955685
											9.45356	0.0949316
											9.4597	0.0943037
											9.46584	0.0936811
											9.47198	0.0930083
											9.47812	0.092337
											9.48426	0.0917608
											9.4904	0.091235
											9.49654	0.0907185
											9.50268	0.0902008
											9.50882	0.089692
											9.51496	0.0892237
											9.5211	0.0888074
											9.52724	0.0884166
											9.53338	0.0880027
											9.53952	0.0875615
											9.54566	0.0870954
											9.5518	0.0867001
											9.55794	0.0863793
											9.56408	0.0860046
											9.57022	0.0856968
											9.57636	0.0854432
											9.5825	0.0851638
											9.58864	0.0847645
											9.59478	0.084256
											9.60092	0.0840497
											9.60707	0.0838796
											9.61321	0.0834611
											9.61935	0.0831293
											9.62549	0.0829387
											9.63163	0.0828048
											9.63777	0.08268
											9.64391	0.0825206
											9.65005	0.0823659
											9.65619	0.0822868
											9.66233	0.0822382
											9.66847	0.0821579
											9.67461	0.0820676
											9.68075	0.0819308
											9.68689	0.081755
											9.69303	0.0816305
											9.69917	0.0815703
											9.70531	0.0815554
											9.71145	0.081529
											9.71759	0.0814639
											9.72373	0.0814394
											9.72987	0.0814912
											9.73601	0.0814963
											9.74215	0.0814946
											9.74829	0.0814929
											9.75443	0.0814186
											9.76058	0.081334
											9.76672	0.0813223
											9.77286	0.0813587
											9.779	0.0813888
											9.78514	0.0813942
											9.79128	0.0814255
											9.79742	0.0815046
											9.80356	0.0816003
											9.8097	0.0815986
											9.81584	0.081597
											9.82198	0.08158
											9.82812	0.0815025
											9.83426	0.0814808
											9.8404	0.0815325
											9.84654	0.0815804
											9.85268	0.0815849
											9.85882	0.0815893
											9.86496	0.0816137
											9.8711	0.0817089
											9.87724	0.0817326
											9.88338	0.081733
											9.88952	0.0816731
											9.89566	0.0816133
											9.9018	0.0815317
											9.90794	0.0815281
											9.91409	0.0815373
											9.92023	0.0815386
											9.92637	0.0815183
											9.93251	0.0814979
											9.93865	0.0815343
											9.94479	0.0815396
											9.95093	0.0815347
											9.95707	0.0815298
											9.96321	0.0814313
											9.96935	0.0813033
											9.97549	0.0812407
											9.98163	0.0812251
											9.98777	0.0811939
											9.99391	0.0811401
											10.0001	0.0810888
											10.0062	0.0810861
											10.0123	0.0810748
											10.0185	0.0810635
											10.0246	0.0810369
											10.0308	0.0809441
											10.0369	0.0808057
											10.043	0.0806878
											10.0492	0.0806314
											10.0553	0.0806119
											10.0615	0.0805837
											10.0676	0.0805151
											10.0737	0.0804743
											10.0799	0.080489
											10.086	0.0804955
											10.0922	0.0804699
											10.0983	0.0804443
											10.1044	0.0803446
											10.1106	0.0802676
											10.1167	0.0802592
											10.1229	0.080289
											10.129	0.0803086
											10.1351	0.0803272
											10.1413	0.0803497
											10.1474	0.080437
											10.1536	0.0805697
											10.1597	0.0806606
											10.1658	0.0807194
											10.172	0.0807497
											10.1781	0.0807641
											10.1843	0.0808335
											10.1904	0.0809755
											10.1965	0.0811309
											10.2027	0.0813121
											10.2088	0.0815003
											10.215	0.0817063
											10.2211	0.0820113
											10.2272	0.0823247
											10.2334	0.082585
											10.2395	0.0828147
											10.2457	0.0830266
											10.2518	0.0832662
											10.2579	0.0836001
											10.2641	0.0842706
											10.2702	0.0849506
											10.2764	0.0854285
											10.2825	0.0859488
											10.2886	0.0864228
											10.2948	0.0870182
											10.3009	0.0876464
											10.3071	0.0881569
											10.3132	0.0886521
											10.3194	0.0891437
											10.3255	0.0897256
											10.3316	0.0904011
											10.3378	0.0911049
											10.3439	0.0918223
											10.3501	0.0925659
											10.3562	0.0933863
											10.3623	0.0943044
											10.3685	0.0952191
											10.3746	0.0960537
											10.3808	0.0968745
											10.3869	0.0978021
											10.393	0.0989811
											10.3992	0.100164
											10.4053	0.101194
											10.4115	0.102227
											10.4176	0.103243
											10.4237	0.104285
											10.4299	0.105454
											10.436	0.106673
											10.4422	0.107823
											10.4483	0.108915
											10.4544	0.109915
											10.4606	0.110884
											10.4667	0.112013
											10.4729	0.113227
											10.479	0.114439
											10.4851	0.115667
											10.4913	0.116884
											10.4974	0.118184
											10.5036	0.119559
											10.5097	0.120877
											10.5158	0.122114
											10.522	0.123268
											10.5281	0.124346
											10.5343	0.125492
											10.5404	0.126769
											10.5465	0.128038
											10.5527	0.129293
											10.5588	0.130524
											10.565	0.131764
											10.5711	0.133114
											10.5772	0.134496
											10.5834	0.13597
											10.5895	0.13731
											10.5957	0.138338
											10.6018	0.139328
											10.608	0.140435
											10.6141	0.141599
											10.6202	0.142719
											10.6264	0.143778
											10.6325	0.144792
											10.6387	0.145879
											10.6448	0.147007
											10.6509	0.148003
											10.6571	0.14889
											10.6632	0.149674
											10.6694	0.150387
											10.6755	0.151166
											10.6816	0.152002
											10.6878	0.152793
											10.6939	0.15354
											10.7001	0.154237
											10.7062	0.154923
											10.7123	0.155673
											10.7185	0.156352
											10.7246	0.156905
											10.7308	0.157404
											10.7369	0.157779
											10.743	0.158119
											10.7492	0.158561
											10.7553	0.15901
											10.7615	0.159394
											10.7676	0.1597
											10.7737	0.159998
											10.7799	0.160362
											10.786	0.160687
											10.7922	0.160901
											10.7983	0.161057
											10.8044	0.161089
											10.8106	0.161121
											10.8167	0.161169
											10.8229	0.16127
											10.829	0.161291
											10.8351	0.161295
											10.8413	0.161282
											10.8474	0.161269
											10.8536	0.16125
											10.8597	0.161152
											10.8658	0.16099
											10.872	0.160785
											10.8781	0.160524
											10.8843	0.160271
											10.8904	0.160036
											10.8965	0.159796
											10.9027	0.159534
											10.9088	0.159214
											10.915	0.158892
											10.9211	0.158592
											10.9273	0.158248
											10.9334	0.157849
											10.9395	0.157399
											10.9457	0.156907
											10.9518	0.156403
											10.958	0.155893
											10.9641	0.155389
											10.9702	0.154892
											10.9764	0.154363
											10.9825	0.153801
											10.9887	0.15323
											10.9948	0.152656
											11.0009	0.152077
											11.0071	0.151468
											11.0132	0.150795
											11.0194	0.150101
											11.0255	0.149441
											11.0316	0.148784
											11.0378	0.148118
											11.0439	0.14744
											11.0501	0.146732
											11.0562	0.146016
											11.0623	0.145301
											11.0685	0.144561
											11.0746	0.143811
											11.0808	0.143034
											11.0869	0.142234
											11.093	0.141473
											11.0992	0.140723
											11.1053	0.139949
											11.1115	0.139165
											11.1176	0.138356
											11.1237	0.137538
											11.1299	0.136733
											11.136	0.135753
											11.1422	0.134759
											11.1483	0.133789
											11.1544	0.13279
											11.1606	0.13194
											11.1667	0.131102
											11.1729	0.130224
											11.179	0.129367
											11.1851	0.128511
											11.1913	0.127639
											11.1974	0.12677
											11.2036	0.125884
											11.2097	0.125007
											11.2159	0.124124
											11.222	0.123228
											11.2281	0.122349
											11.2343	0.121471
											11.2404	0.12056
											11.2466	0.119664
											11.2527	0.118783
											11.2588	0.117874
											11.265	0.116974
											11.2711	0.116063
											11.2773	0.115131
											11.2834	0.114217
											11.2895	0.11329
											11.2957	0.112328
											11.3018	0.111407
											11.308	0.110502
											11.3141	0.109549
											11.3202	0.108599
											11.3264	0.107659
											11.3325	0.10673
											11.3387	0.105806
											11.3448	0.10486
											11.3509	0.103922
											11.3571	0.102993
											11.3632	0.102034
											11.3694	0.10108
											11.3755	0.100171
											11.3816	0.0989539
											11.3878	0.0976539
											11.3939	0.0966629
											11.4001	0.0957334
											11.4062	0.0948233
											11.4123	0.0939221
											11.4185	0.092995
											11.4246	0.0920687
											11.4308	0.0911387
											11.4369	0.0902053
											11.443	0.0893078
											11.4492	0.088414
											11.4553	0.0875302
											11.4615	0.0866438
											11.4676	0.0856466
											11.4737	0.0844797
											11.4799	0.0833419
											11.486	0.0823803
											11.4922	0.0814944
											11.4983	0.0806232
											11.5044	0.0797354
											11.5106	0.0788621
											11.5167	0.078009
											11.5229	0.0771698
											11.529	0.0763348
											11.5352	0.0754791
											11.5413	0.0746277
											11.5474	0.0738267
											11.5536	0.0730176
											11.5597	0.0721758
											11.5659	0.0713588
											11.572	0.070541
											11.5781	0.0697156
											11.5843	0.0689323
											11.5904	0.0681617
											11.5966	0.0673633
											11.6027	0.0665731
											11.6088	0.065793
											11.615	0.0650452
											11.6211	0.0643149
											11.6273	0.0635456
											11.6334	0.0627703
											11.6395	0.0620162
											11.6457	0.0612566
											11.6518	0.0604957
											11.658	0.0597708
											11.6641	0.0590544
											11.6702	0.0583351
											11.6764	0.057624
											11.6825	0.056893
											11.6887	0.0561946
											11.6948	0.0555029
											11.7009	0.0547948
											11.7071	0.0541038
											11.7132	0.0534087
											11.7194	0.0527162
											11.7255	0.0520433
											11.7316	0.0513685
											11.7378	0.0506966
											11.7439	0.0500528
											11.7501	0.0493874
											11.7562	0.0487464
											11.7623	0.048137
											11.7685	0.0475017
											11.7746	0.0468659
											11.7808	0.0462343
											11.7869	0.0456052
											11.793	0.0449847
											11.7992	0.0443879
											11.8053	0.0438118
											11.8115	0.0432369
											11.8176	0.0426425
											11.8237	0.0420634
											11.8299	0.0415204
											11.836	0.0409895
											11.8422	0.0404391
											11.8483	0.0398751
											11.8545	0.0393192
											11.8606	0.038762
											11.8667	0.0382416
											11.8729	0.0377342
											11.879	0.0372449
											11.8852	0.0367468
											11.8913	0.0362208
											11.8974	0.0357484
											11.9036	0.0353083
											11.9097	0.0348558
											11.9159	0.034377
											11.922	0.0338689
											11.9281	0.033346
											11.9343	0.0328498
											11.9404	0.0324149
											11.9466	0.0319798
											11.9527	0.0315456
											11.9588	0.0311214
											11.965	0.0306905
											11.9711	0.0302899
											11.9773	0.0299164
											11.9834	0.0295249
											11.9895	0.0290903
											11.9957	0.0286447
											12.0018	0.0282273
											12.008	0.0278525
											12.0141	0.0274841
											12.0202	0.0271202
											12.0264	0.0267541
											12.0325	0.0263846
											12.0387	0.026059
											12.0448	0.025757
											12.0509	0.0254493
											12.0571	0.0251158
											12.0632	0.0247625
											12.0694	0.0244001
											12.0755	0.0240764
											12.0816	0.0237996
											12.0878	0.0235256
											12.0939	0.0232367
											12.1001	0.0229386
											12.1062	0.0226746
											12.1123	0.0224309
											12.1185	0.0221849
											12.1246	0.0219346
											12.1308	0.0216462
											12.1369	0.0213249
											12.1431	0.0210308
											12.1492	0.0207886
											12.1553	0.0205669
											12.1615	0.0203261
											12.1676	0.0200769
											12.1738	0.0198469
											12.1799	0.0196677
											12.186	0.0194903
											12.1922	0.0192676
											12.1983	0.0190453
											12.2045	0.0187902
											12.2106	0.0185113
											12.2167	0.0182999
											12.2229	0.01811
											12.229	0.0179204
											12.2352	0.017739
											12.2413	0.0175624
											12.2474	0.0173932
											12.2536	0.017257
											12.2597	0.0171197
											12.2659	0.0169223
											12.272	0.016704
											12.2781	0.0164472
											12.2843	0.0162292
											12.2904	0.0160885
											12.2966	0.0159419
											12.3027	0.0157766
											12.3088	0.0156136
											12.315	0.0154748
											12.3211	0.0153657
											12.3273	0.015273
											12.3334	0.0151377
											12.3395	0.0149777
											12.3457	0.0148023
											12.3518	0.0146009
											12.358	0.0144555
											12.3641	0.0143455
											12.3702	0.0142449
											12.3764	0.0141338
											12.3825	0.0139992
											12.3887	0.0139157
											12.3948	0.0138691
											12.4009	0.0138042
											12.4071	0.0137248
											12.4132	0.0135981
											12.4194	0.0134207
											12.4255	0.0132578
											12.4316	0.0131792
											12.4378	0.0131179
											12.4439	0.0130322
											12.4501	0.0129311
											12.4562	0.0128421
											12.4624	0.0128119
											12.4685	0.0127705
											12.4746	0.0126776
											12.4808	0.0125581
											12.4869	0.0124004
											12.4931	0.0122478
											12.4992	0.0121594
											12.5053	0.0120897
											12.5115	0.0120396
											12.5176	0.0119855
											12.5238	0.01189
											12.5299	0.0118181
											12.536	0.011805
											12.5422	0.0117508
											12.5483	0.0116526
											12.5545	0.0115544
											12.5606	0.0114363
											12.5667	0.011349
											12.5729	0.0113053
											12.579	0.011267
											12.5852	0.0112184
											12.5913	0.0111577
											12.5974	0.0111126
											12.6036	0.0111094
											12.6097	0.0111062
											12.6159	0.0110976
											12.622	0.0110219
											12.6281	0.0109146
											12.6343	0.0108078
											12.6404	0.0107483
											12.6466	0.0107296
											12.6527	0.0106892
											12.6588	0.0106283
											12.665	0.0105908
											12.6711	0.0105807
											12.6773	0.0105749
											12.6834	0.0105691
											12.6895	0.0105449
											12.6957	0.0104476
											12.7018	0.0103379
											12.708	0.0102653
											12.7141	0.0102507
											12.7202	0.0102485
											12.7264	0.0102258
											12.7325	0.0101903
											12.7387	0.0101699
											12.7448	0.0101815
											12.751	0.0101833
											12.7571	0.0101415
											12.7632	0.0100997
											12.7694	0.0099943
											12.7755	0.00991475
											12.7817	0.00987804
											12.7878	0.00986218
											12.7939	0.00985152
											12.8001	0.00983122
											12.8062	0.00980324
											12.8124	0.00982949
											12.8185	0.00982544
											12.8246	0.00982138
											12.8308	0.00980421
											12.8369	0.00971149
											12.8431	0.00960393
											12.8492	0.0095462
											12.8553	0.00954431
											12.8615	0.00954243
											12.8676	0.0095388
											12.8738	0.00949737
											12.8799	0.00947813
											12.886	0.0094908
											12.8922	0.00949376
											12.8983	0.00945759
											12.9045	0.00942142
											12.9106	0.00930228
											12.9167	0.00921012
											12.9229	0.00918153
											12.929	0.00917176
											12.9352	0.00914663
											12.9413	0.00909772
											12.9474	0.00905506
											12.9536	0.0090574
											12.9597	0.0090563
											12.9659	0.0090552
											12.972	0.00899489
											12.9781	0.00888158
											12.9843	0.00876545
											12.9904	0.0087428
											12.9966	0.00871881
											13.0027	0.00868657
											13.0088	0.00865867
											13.015	0.00861569
											13.0211	0.00859933
											13.0273	0.00859039
											13.0334	0.00858146
											13.0395	0.00856066
											13.0457	0.00846873
											13.0518	0.008339
											13.058	0.00826866
											13.0641	0.0082473
											13.0703	0.00823615
											13.0764	0.00820921
											13.0825	0.00816689
											13.0887	0.00812713
											13.0948	0.00812471
											13.101	0.00812228
											13.1071	0.00811416
											13.1132	0.00803948
											13.1194	0.00791236
											13.1255	0.00781323
											13.1317	0.00778129
											13.1378	0.00776961
											13.1439	0.00773959
											13.1501	0.00769667
											13.1562	0.00767549
											13.1624	0.00768061
											13.1685	0.00768071
											13.1746	0.00764771
											13.1808	0.00761472
											13.1869	0.00753506
											13.1931	0.00742745
											13.1992	0.00736498
											13.2053	0.00734959
											13.2115	0.00730783
											13.2176	0.00725363
											13.2238	0.00720265
											13.2299	0.00719458
											13.236	0.00719405
											13.2422	0.00719353
											13.2483	0.00714203
											13.2545	0.00705862
											13.2606	0.00693212
											13.2667	0.00683128
											13.2729	0.00678757
											13.279	0.00677213
											13.2852	0.0067425
											13.2913	0.0066757
											13.2974	0.00661765
											13.3036	0.00661695
											13.3097	0.00661625
											13.3159	0.00660744
											13.322	0.00653432
											13.3281	0.00641274
											13.3343	0.00631419
											13.3404	0.0062596
											13.3466	0.00624224
											13.3527	0.00622592
											13.3589	0.00617887
											13.365	0.00611479
											13.3711	0.00610683
											13.3773	0.00610338
											13.3834	0.00609992
											13.3896	0.00608116
											13.3957	0.00599132
											13.4018	0.00586634
											13.408	0.00579707
											13.4141	0.00577588
											13.4203	0.00576668
											13.4264	0.0057437
											13.4325	0.00568076
											13.4387	0.00564037
											13.4448	0.00565151
											13.451	0.00565068
											13.4571	0.00564985
											13.4632	0.00560769
											13.4694	0.00550595
											13.4755	0.00538965
											13.4817	0.00535467
											13.4878	0.00534022
											13.4939	0.00532514
											13.5001	0.00531006
											13.5062	0.00524545
											13.5124	0.00524415
											13.5185	0.00522339
											13.5246	0.00520264
											13.5308	0.00516105
											13.5369	0.00506977
											13.5431	0.00497559
											13.5492	0.00492911
											13.5553	0.00492154
											13.5615	0.00489506
											13.5676	0.00485853
											13.5738	0.00481175
											13.5799	0.00479336
											13.586	0.00480316
											13.5922	0.00480757
											13.5983	0.00477814
											13.6045	0.00474871
											13.6106	0.00466271
											13.6167	0.00458886
											13.6229	0.00455356
											13.629	0.00456214
											13.6352	0.00455563
											13.6413	0.00454911
											13.6474	0.00453618
											13.6536	0.00456474
											13.6597	0.00456554
											13.6659	0.00455772
											13.672	0.00454991
											13.6782	0.00447249
											13.6843	0.00442421
											13.6904	0.00438383
											13.6966	0.00436004
											13.7027	0.00436253
											13.7089	0.00435892
											13.715	0.00435531
											13.7211	0.00439368
											13.7273	0.00446016
											13.7334	0.00445104
											13.7396	0.00444192
											13.7457	0.00441216
											13.7518	0.00431957
											13.758	0.00428368
											13.7641	0.00429691
											13.7703	0.00429821
											13.7764	0.00429615
											13.7825	0.00429408
											13.7887	0.00428589
											13.7948	0.00433525
											13.801	0.00436471
											13.8071	0.00437353
											13.8132	0.00434058
											13.8194	0.00430764
											13.8255	0.00424551
											13.8317	0.00423579
											13.8378	0.0042463
											13.8439	0.00426303
											13.8501	0.0042851
											13.8562	0.00429656
											13.8624	0.00433294
											13.8685	0.00439372
											13.8746	0.00440528
											13.8808	0.00439804
											13.8869	0.0043908
											13.8931	0.00432989
											13.8992	0.00432011
											13.9053	0.00434068
											13.9115	0.00435653
											13.9176	0.00437814
											13.9238	0.00439914
[truncated: 1,278 more rows]

## Sheet: SEC-MALS QT13-OD
volume (mL)	Molar Mass 1	volume (mL)	Molar Mass 2		volume (mL)	RI
16.1698	23516.8	10.1726	107529		2.49794	0.000189403
16.1758	23473.2	10.1786	107504		2.50408	0.000197694
16.1817	23428	10.1845	107630		2.51022	0.000206434
16.1877	23360.9	10.1905	107610		2.51637	0.000210526
16.1937	23321.4	10.1965	107550		2.52251	0.000208923
16.1997	23271	10.2025	107362		2.52865	0.000207319
16.2056	23245.1	10.2084	107350		2.5348	0.000211715
16.2116	23237	10.2144	107310		2.54094	0.000223906
16.2176	23213.6	10.2204	107316		2.54708	0.000233827
16.2235	23203.9	10.2264	107089		2.55323	0.000237471
16.2295	23195.1	10.2323	106995		2.55937	0.000240416
16.2355	23170.2	10.2383	106964		2.56552	0.000242597
16.2415	23107.8	10.2443	106798		2.57166	0.000244104
16.2474	23087	10.2502	106711		2.5778	0.000247944
16.2534	23035.6	10.2562	106561		2.58395	0.000248217
16.2594	22997.7	10.2622	106341		2.59009	0.000248489
16.2654	22932.5	10.2682	106166		2.59623	0.000243958
16.2713	22903.5	10.2741	106069		2.60238	0.00023079
16.2773	22858.9	10.2801	105946		2.60852	0.000238077
16.2833	22842.6	10.2861	105908		2.61466	0.000255367
16.2893	22807.6	10.2921	105770		2.62081	0.000263672
16.2952	22758.4	10.298	105646		2.62695	0.000266106
16.3012	22706.7	10.304	105533		2.63309	0.000273047
16.3072	22644	10.31	105472		2.63924	0.000283926
16.3131	22602.9	10.316	105426		2.64538	0.000290833
16.3191	22551.1	10.3219	105414		2.65153	0.000290748
16.3251	22501.6	10.3279	105432		2.65767	0.000290663
16.3311	22452.5	10.3339	105353		2.66381	0.000289918
16.337	22411.8	10.3398	105195		2.66996	0.000302755
16.343	22365.4	10.3458	105056		2.6761	0.000316315
16.349	22325.8	10.3518	104961		2.68224	0.000339053
16.355	22292.6	10.3578	104843		2.68839	0.000357428
16.3609	22255.4	10.3637	104701		2.69453	0.000358517
16.3669	22210	10.3697	104628		2.70067	0.000364705
16.3729	22165.9	10.3757	104562		2.70682	0.000379557
16.3789	22127.2	10.3817	104616		2.71296	0.000395034
16.3848	22087.9	10.3876	104627		2.7191	0.000397648
16.3908	22050.8	10.3936	104672		2.72525	0.000397485
16.3968	22008.8	10.3996	104642		2.73139	0.000397322
16.4027	21968	10.4056	104609		2.73754	0.000403903
16.4087	21921.7	10.4115	104509		2.74368	0.000417482
16.4147	21875.7	10.4175	104463		2.74982	0.000430219
16.4207	21840.5	10.4235	104355		2.75597	0.000454119
16.4266	21809.7	10.4294	104232		2.76211	0.000477751
16.4326	21779.6	10.4354	104058		2.76825	0.000492234
16.4386	21738.7	10.4414	103850		2.7744	0.000505461
16.4446	21698.9	10.4474	103753		2.78054	0.000530844
16.4505	21661.4	10.4533	103736		2.78668	0.000563503
16.4565	21626.6	10.4593	103761		2.79283	0.000571562
16.4625	21588.9	10.4653	103713		2.79897	0.000576602
16.4685	21560.4	10.4713	103697		2.80511	0.000590214
16.4744	21526	10.4772	103577		2.81126	0.000600032
16.4804	21489.2	10.4832	103464		2.8174	0.000613146
16.4864	21463.4	10.4892	103312		2.82355	0.000633831
16.4923	21435.7	10.4952	103267		2.82969	0.000651649
16.4983	21401.1	10.5011	103223		2.83583	0.000664671
16.5043	21363.7	10.5071	103163		2.84198	0.000676904
16.5103	21322.9	10.5131	103070		2.84812	0.000684162
16.5162	21292.4	10.519	102996		2.85426	0.000689803
16.5222	21257	10.525	102966		2.86041	0.000691344
16.5282	21221.6	10.531	102918		2.86655	0.000691742
16.5342	21195	10.537	102880		2.87269	0.000691473
16.5401	21190.2	10.5429	102806		2.87884	0.000691204
16.5461	21185.3	10.5489	102704		2.88498	0.000697654
16.5521	21179.8	10.5549	102587		2.89112	0.000715774
16.5581	21153.6	10.5609	102453		2.89727	0.000730467
16.564	21114	10.5668	102329		2.90341	0.000736439
16.57	21074.4	10.5728	102173		2.90956	0.000737583
16.576	21036.4	10.5788	102036		2.9157	0.000741207
16.5819	21002.8	10.5848	101909		2.92184	0.00074484
16.5879	20974	10.5907	101832		2.92799	0.000755946
16.5939	20939.8	10.5967	101757		2.93413	0.00077459
16.5999	20897.2	10.6027	101734		2.94027	0.000774867
16.6058	20867.9	10.6086	101663		2.94642	0.000775144
16.6118	20858	10.6146	101561		2.95256	0.000773884
16.6178	20837.2	10.6206	101422		2.9587	0.00079639
16.6238	20801.7	10.6266	101303		2.96485	0.000812471
16.6297	20770.4	10.6325	101197		2.97099	0.000828552
16.6357	20732	10.6385	101056		2.97713	0.000829677
16.6417	20681	10.6445	100894		2.98328	0.000845397
16.6477	20652	10.6505	100768		2.98942	0.000864918
16.6536	20623	10.6564	100697		2.99557	0.000885998
16.6596	20613.9	10.6624	100590		3.00171	0.000894713
16.6656	20597.1	10.6684	100525		3.00785	0.000896817
16.6715	20565.7	10.6744	100437		3.014	0.000906768
16.6775	20550.2	10.6803	100345		3.02014	0.000907612
16.6835	20537.9	10.6863	100197		3.02628	0.000908455
16.6895	20500.9	10.6923	100057		3.03243	0.000929764
16.6954	20454.7	10.6982	99885.2		3.03857	0.000942445
16.7014	20424.9	10.7042	99743.9		3.04471	0.000948922
16.7074	20366.6	10.7102	99604.4		3.05086	0.000951859
16.7134	20335.9	10.7162	99476.2		3.057	0.000954795
16.7193	20297.6	10.7221	99364.2		3.06314	0.000972547
16.7253	20282.1	10.7281	99241.3		3.06929	0.000971534
16.7313	20242.3	10.7341	99131		3.07543	0.000970522
16.7373	20207.9	10.7401	99021.2		3.08158	0.000966084
		10.746	98918.5		3.08772	0.000964222
10.1726	107529	10.752	98804		3.09386	0.000965001
10.1786	107504	10.758	98678.6		3.10001	0.000965599
10.1845	107630	10.764	98547.1		3.10615	0.000966705
10.1905	107610	10.7699	98410.5		3.11229	0.000968001
10.1965	107550	10.7759	98264.5		3.11844	0.000969889
10.2025	107362	10.7819	98110.4		3.12458	0.000975478
10.2084	107350	10.7878	97962.3		3.13072	0.000981108
10.2144	107310	10.7938	97825.6		3.13687	0.000986387
10.2204	107316	10.7998	97704.8		3.14301	0.000988044
10.2264	107089	10.8058	97573.7		3.14915	0.000979014
10.2323	106995	10.8117	97447.4		3.1553	0.000969984
10.2383	106964	10.8177	97319.3		3.16144	0.000965099
10.2443	106798	10.8237	97174.4		3.16759	0.000970687
10.2502	106711	10.8297	97017.3		3.17373	0.000973228
10.2562	106561	10.8356	96859.1		3.17987	0.000973275
10.2622	106341	10.8416	96703.1		3.18602	0.000973321
10.2682	106166	10.8476	96542.4		3.19216	0.000970057
10.2741	106069	10.8536	96389		3.1983	0.000958553
10.2801	105946	10.8595	96242.4		3.20445	0.000949597
10.2861	105908	10.8655	96108.8		3.21059	0.000939814
10.2921	105770	10.8715	95964.6		3.21673	0.000915713
10.298	105646	10.8774	95842.2		3.22288	0.00088729
10.304	105533	10.8834	95733.4		3.22902	0.000873355
10.31	105472	10.8894	95582.8		3.23516	0.000859566
10.316	105426	10.8954	95411.6		3.24131	0.000858327
10.3219	105414	10.9013	95242.3		3.24745	0.000850811
10.3279	105432	10.9073	95072.9		3.2536	0.000835185
10.3339	105353	10.9133	94891.5		3.25974	0.000832876
10.3398	105195	10.9193	94708.5		3.26588	0.000830567
10.3458	105056	10.9252	94543.7		3.27203	0.000821734
10.3518	104961	10.9312	94386.2		3.27817	0.000821271
10.3578	104843	10.9372	94241.7		3.28431	0.000812254
10.3637	104701	10.9432	94089.5		3.29046	0.000793155
10.3697	104628	10.9491	93928.3		3.2966	0.000789212
10.3757	104562	10.9551	93742		3.30274	0.000780921
10.3817	104616	10.9611	93576.6		3.30889	0.000778102
10.3876	104627	10.967	93419.2		3.31503	0.000778491
10.3936	104672	10.973	93252		3.32117	0.000777457
10.3996	104642	10.979	93070.6		3.32732	0.000776424
10.4056	104609	10.985	92878.2		3.33346	0.000773991
10.4115	104509	10.9909	92696.7		3.33961	0.000771788
10.4175	104463	10.9969	92527		3.34575	0.000769584
10.4235	104355	11.0029	92384.5		3.35189	0.000763181
10.4294	104232	11.0089	92229.9		3.35804	0.000739977
10.4354	104058	11.0148	92066.5		3.36418	0.000713056
10.4414	103850	11.0208	91871.1		3.37032	0.000689818
10.4474	103753	11.0268	91668.3		3.37647	0.000676738
10.4533	103736	11.0328	91500.8		3.38261	0.000676011
10.4593	103761	11.0387	91344.2		3.38875	0.000675284
10.4653	103713	11.0447	91193.3		3.3949	0.000672987
10.4713	103697	11.0507	91053.3		3.40104	0.000648565
10.4772	103577	11.0566	90917.6		3.40718	0.000611302
10.4832	103464	11.0626	90762.1		3.41333	0.00060173
10.4892	103312	11.0686	90626.9		3.41947	0.00060117
10.4952	103267	11.0746	90440.9		3.42562	0.000581428
10.5011	103223	11.0805	90259.6		3.43176	0.000547312
10.5071	103163	11.0865	90021.4		3.4379	0.00052372
10.5131	103070	11.0925	89787.8		3.44405	0.00049883
10.519	102996	11.0985	89571.5		3.45019	0.000487499
10.525	102966	11.1044	89397.9		3.45633	0.000487452
10.531	102918	11.1104	89186.6		3.46248	0.000487404
10.537	102880	11.1164	88953.8		3.46862	0.000484591
10.5429	102806	11.1224	88762.7		3.47476	0.000470742
10.5489	102704	11.1283	88545.6		3.48091	0.000454783
10.5549	102587	11.1343	88375.2		3.48705	0.000450663
10.5609	102453	11.1403	88208.7		3.49319	0.000446542
10.5668	102329	11.1462	88054.1		3.49934	0.000430449
10.5728	102173	11.1522	87864.5		3.50548	0.000416489
10.5788	102036	11.1582	87654.5		3.51163	0.000401275
10.5848	101909	11.1642	87410.5		3.51777	0.000387563
10.5907	101832	11.1701	87191.5		3.52391	0.000384618
10.5967	101757	11.1761	86980.8		3.53006	0.000382581
10.6027	101734	11.1821	86778.8		3.5362	0.000380544
10.6086	101663	11.1881	86577.4		3.54234	0.000373041
10.6146	101561	11.194	86380.6		3.54849	0.000353047
10.6206	101422	11.2	86224.9		3.55463	0.000351362
10.6266	101303	11.206	86104.6		3.56077	0.000349678
10.6325	101197	11.2119	85951.3		3.56692	0.000341037
10.6385	101056	11.2179	85726.4		3.57306	0.000320379
10.6445	100894	11.2239	85512.5		3.57921	0.000306632
10.6505	100768	11.2299	85336.6		3.58535	0.000297895
10.6564	100697	11.2358	85122.9		3.59149	0.000300278
10.6624	100590	11.2418	84857.2		3.59764	0.000301904
10.6684	100525	11.2478	84613		3.60378	0.000300921
10.6744	100437	11.2538	84396.9		3.60992	0.000299938
10.6803	100345	11.2597	84173.6		3.61607	0.000283977
10.6863	100197	11.2657	83980.5		3.62221	0.000282773
10.6923	100057	11.2717	83769.7		3.62835	0.00028056
10.6982	99885.2	11.2777	83607.8		3.6345	0.000278348
10.7042	99743.9	11.2836	83416.1		3.64064	0.000256454
10.7102	99604.4	11.2896	83180.3		3.64678	0.000233546
10.7162	99476.2	11.2956	82971.8		3.65293	0.000222464
10.7221	99364.2	11.3015	82685.3		3.65907	0.000222382
10.7281	99241.3	11.3075	82439.7		3.66522	0.000222301
10.7341	99131	11.3135	82170.4		3.67136	0.000217129
10.7401	99021.2	11.3195	82001.8		3.6775	0.00021549
10.746	98918.5	11.3254	81795.4		3.68365	0.000205176
10.752	98804	11.3314	81615.8		3.68979	0.000198881
10.758	98678.6	11.3374	81380.1		3.69593	0.00019897
10.764	98547.1	11.3434	81215.5		3.70208	0.000199058
10.7699	98410.5	11.3493	81108.7		3.70822	0.000193378
10.7759	98264.5	11.3553	81021.6		3.71436	0.000172281
10.7819	98110.4	11.3613	80823.6		3.72051	0.000163378
10.7878	97962.3	11.3673	80597.2		3.72665	0.000152011
10.7938	97825.6	11.3732	80342.4		3.73279	0.000151639
10.7998	97704.8	11.3792	80089.7		3.73894	0.000147889
10.8058	97573.7	11.3852	79855.4		3.74508	0.000144139
10.8117	97447.4	11.3911	79662.9		3.75123	0.000137494
10.8177	97319.3	11.3971	79470.5		3.75737	0.00013287
10.8237	97174.4	11.4031	79264		3.76351	0.000127752
10.8297	97017.3	11.4091	79048		3.76966	0.000124282
10.8356	96859.1	11.415	78848		3.7758	0.000116852
10.8416	96703.1	11.421	78702.4		3.78194	0.000101773
10.8476	96542.4	11.427	78548		3.78809	8.45653e-05
10.8536	96389	11.433	78339.9		3.79423	7.09772e-05
10.8595	96242.4	11.4389	78095.7		3.80037	6.54017e-05
10.8655	96108.8	11.4449	77846		3.80652	6.36757e-05
10.8715	95964.6	11.4509	77598.4		3.81266	6.32873e-05
10.8774	95842.2	11.4569	77337.9		3.8188	5.79715e-05
10.8834	95733.4	11.4628	77135.9		3.82495	5.24492e-05
10.8894	95582.8	11.4688	77024.5		3.83109	4.89123e-05
10.8954	95411.6	11.4748	76849.8		3.83724	4.81379e-05
10.9013	95242.3	11.4807	76582.7		3.84338	4.39769e-05
10.9073	95072.9	11.4867	76345.1		3.84952	3.40445e-05
10.9133	94891.5	11.4927	76174.8		3.85567	2.24115e-05
10.9193	94708.5	11.4987	75951.2		3.86181	2.20536e-06
10.9252	94543.7	11.5046	75788.2		3.86795	-1.31451e-05
10.9312	94386.2	11.5106	75507.7		3.8741	-1.89647e-06
10.9372	94241.7	11.5166	75246.8		3.88024	5.61455e-06
10.9432	94089.5	11.5226	74945.2		3.88638	5.52031e-06
10.9491	93928.3	11.5285	74757.9		3.89253	5.42606e-06
10.9551	93742	11.5345	74523.2		3.89867	-1.02014e-05
10.9611	93576.6	11.5405	74324.7		3.90481	-5.05963e-07
10.967	93419.2	11.5465	74100.7		3.91096	5.24669e-06
10.973	93252	11.5524	73940.5		3.9171	4.48083e-06
10.979	93070.6	11.5584	73808.3		3.92325	3.71497e-06
10.985	92878.2	11.5644	73726.7		3.92939	9.76554e-07
10.9909	92696.7	11.5703	73529		3.93553	-1.19098e-05
10.9969	92527	11.5763	73284		3.94168	-1.15935e-05
11.0029	92384.5	11.5823	73003.3		3.94782	-2.74231e-06
11.0089	92229.9	11.5883	72820.8		3.95396	-5.29898e-06
11.0148	92066.5	11.5942	72756.1		3.96011	-7.85565e-06
11.0208	91871.1	11.6002	72590.2		3.96625	-1.70795e-05
11.0268	91668.3	11.6062	72377.9		3.97239	-1.87512e-05
11.0328	91500.8	11.6122	72149.6		3.97854	-2.323e-05
11.0387	91344.2	11.6181	71947.8		3.98468	-2.77088e-05
11.0447	91193.3	11.6241	71766		3.99082	-3.03831e-05
11.0507	91053.3	11.6301	71587.3		3.99697	-3.22822e-05
11.0566	90917.6	11.6361	71405.9		4.00311	-3.48143e-05
11.0626	90762.1	11.642	70884.9		4.00926	-4.35407e-05
11.0686	90626.9				4.0154	-4.56283e-05
11.0746	90440.9				4.02154	-2.65783e-05
11.0805	90259.6				4.02769	-2.47183e-05
11.0865	90021.4				4.03383	-1.80454e-05
11.0925	89787.8				4.03997	-1.67218e-05
11.0985	89571.5				4.04612	-1.53983e-05
11.1044	89397.9				4.05226	-1.49756e-05
11.1104	89186.6				4.0584	-1.80616e-05
11.1164	88953.8				4.06455	-2.11476e-05
11.1224	88762.7				4.07069	-3.24635e-05
11.1283	88545.6				4.07683	-3.17307e-05
11.1343	88375.2				4.08298	-3.0998e-05
11.1403	88208.7				4.08912	-2.79293e-05
11.1462	88054.1				4.09527	-2.56533e-05
11.1522	87864.5				4.10141	-2.50354e-05
11.1582	87654.5				4.10755	-2.63507e-05
11.1642	87410.5				4.1137	-2.76659e-05
11.1701	87191.5				4.11984	-2.74378e-05
11.1761	86980.8				4.12598	-2.72097e-05
11.1821	86778.8				4.13213	-2.88166e-05
11.1881	86577.4				4.13827	-2.98873e-05
11.194	86380.6				4.14441	-4.34107e-05
11.2	86224.9				4.15056	-4.2476e-05
11.206	86104.6				4.1567	-2.79996e-05
11.2119	85951.3				4.16284	-2.43226e-05
11.2179	85726.4				4.16899	-2.33377e-05
11.2239	85512.5				4.17513	-2.03122e-05
11.2299	85336.6				4.18128	-2.12706e-05
11.2358	85122.9				4.18742	-2.22291e-05
11.2418	84857.2				4.19356	-2.58814e-05
11.2478	84613				4.19971	-4.39696e-05
11.2538	84396.9				4.20585	-6.14737e-05
11.2597	84173.6				4.21199	-6.49433e-05
11.2657	83980.5				4.21814	-6.5974e-05
11.2717	83769.7				4.22428	-6.58424e-05
11.2777	83607.8				4.23042	-6.57108e-05
11.2836	83416.1				4.23657	-6.85164e-05
11.2896	83180.3				4.24271	-7.42582e-05
11.2956	82971.8				4.24885	-6.37928e-05
11.3015	82685.3				4.255	-6.18003e-05
11.3075	82439.7				4.26114	-6.35668e-05
11.3135	82170.4				4.26729	-6.53333e-05
11.3195	82001.8				4.27343	-7.56122e-05
11.3254	81795.4				4.27957	-6.9443e-05
11.3314	81615.8				4.28572	-6.57702e-05
11.3374	81380.1				4.29186	-6.44067e-05
11.3434	81215.5				4.298	-6.31161e-05
11.3493	81108.7				4.30415	-6.3655e-05
11.3553	81021.6				4.31029	-6.41938e-05
11.3613	80823.6				4.31643	-6.15538e-05
11.3673	80597.2				4.32258	-5.81844e-05
11.3732	80342.4				4.32872	-5.9184e-05
11.3792	80089.7				4.33486	-6.01836e-05
11.3852	79855.4				4.34101	-6.30717e-05
11.3911	79662.9				4.34715	-7.17467e-05
11.3971	79470.5				4.3533	-8.11564e-05
11.4031	79264				4.35944	-9.08941e-05
11.4091	79048				4.36558	-8.2241e-05
11.415	78848				4.37173	-6.68253e-05
11.421	78702.4				4.37787	-6.08343e-05
11.427	78548				4.38401	-5.54473e-05
11.433	78339.9				4.39016	-5.44591e-05
11.4389	78095.7				4.3963	-5.32338e-05
11.4449	77846				4.40244	-5.47652e-05
11.4509	77598.4				4.40859	-5.62967e-05
11.4569	77337.9				4.41473	-6.56701e-05
11.4628	77135.9				4.42087	-7.14025e-05
11.4688	77024.5				4.42702	-8.08332e-05
11.4748	76849.8				4.43316	-8.95272e-05
11.4807	76582.7				4.43931	-9.17783e-05
11.4867	76345.1				4.44545	-9.40295e-05
11.4927	76174.8				4.45159	-0.000102317
11.4987	75951.2				4.45774	-0.00010261
11.5046	75788.2				4.46388	-0.000102222
11.5106	75507.7				4.47002	-0.000102082
11.5166	75246.8				4.47617	-0.000101943
11.5226	74945.2				4.48231	-0.000127839
11.5285	74757.9				4.48845	-0.000155091
11.5345	74523.2				4.4946	-0.000163842
11.5405	74324.7				4.50074	-0.000164683
11.5465	74100.7				4.50688	-0.000165524
11.5524	73940.5				4.51303	-0.000168282
11.5584	73808.3				4.51917	-0.000172484
11.5644	73726.7				4.52532	-0.000172377
11.5703	73529				4.53146	-0.00017227
11.5763	73284				4.5376	-0.000173159
11.5823	73003.3				4.54375	-0.000177561
11.5883	72820.8				4.54989	-0.000190716
11.5942	72756.1				4.55603	-0.000196343
11.6002	72590.2				4.56218	-0.000198564
11.6062	72377.9				4.56832	-0.000200043
11.6122	72149.6				4.57446	-0.000189163
11.6181	71947.8				4.58061	-0.00018071
11.6241	71766				4.58675	-0.000178463
11.6301	71587.3				4.59289	-0.00017497
11.6361	71405.9				4.59904	-0.000174788
11.642	70884.9				4.60518	-0.000174606
					4.61133	-0.00017498
					4.61747	-0.000184619
					4.62361	-0.000183498
					4.62976	-0.000183182
					4.6359	-0.000182865
					4.64204	-0.000175749
					4.64819	-0.000155306
					4.65433	-0.000150831
					4.66047	-0.000144393
					4.66662	-0.000133399
					4.67276	-0.000131649
					4.67891	-0.000111567
					4.68505	-9.49147e-05
					4.69119	-9.28283e-05
					4.69734	-9.07418e-05
					4.70348	-8.48539e-05
					4.70962	-7.4519e-05
					4.71577	-4.50055e-05
					4.72191	-3.40445e-05
					4.72805	-2.30835e-05
					4.7342	-2.10135e-05
					4.74034	-1.48817e-05
					4.74648	7.2794e-06
					4.75263	7.51795e-06
					4.75877	7.75649e-06
					4.76492	4.65626e-06
					4.77106	6.24784e-06
					4.7772	7.83941e-06
					4.78335	1.95081e-05
					4.78949	4.04021e-05
					4.79563	4.19037e-05
					4.80178	4.08888e-05
					4.80792	3.98739e-05
					4.81406	3.72138e-05
					4.82021	3.61733e-05
					4.82635	3.51327e-05
					4.83249	2.91022e-05
					4.83864	1.78728e-05
					4.84478	2.35659e-05
					4.85093	2.8814e-05
					4.85707	3.03051e-05
					4.86321	4.67819e-05
					4.86936	5.80975e-05
					4.8755	6.23697e-05
					4.88164	6.79084e-05
					4.88779	7.49497e-05
					4.89393	7.93814e-05
					4.90007	8.09917e-05
					4.90622	8.00533e-05
					4.91236	7.91148e-05
					4.9185	8.9668e-05
					4.92465	0.000105611
					4.93079	0.000116984
					4.93694	0.000124214
					4.94308	0.00013578
					4.94922	0.000146119
					4.95537	0.000152879
					4.96151	0.000161645
					4.96765	0.000163588
					4.9738	0.000164437
					4.97994	0.000163717
					4.98608	0.000162997
					4.99223	0.000166904
					4.99837	0.000182852
					5.00451	0.000192227
					5.01066	0.000194309
					5.0168	0.000195399
					5.02295	0.000196489
					5.02909	0.000195131
					5.03523	0.000193772
					5.04138	0.000187328
					5.04752	0.000179328
					5.05366	0.000166535
					5.05981	0.00016023
					5.06595	0.000177899
					5.07209	0.000185078
					5.07824	0.000185837
					5.08438	0.000185209
					5.09052	0.000184581
					5.09667	0.000199517
					5.10281	0.000198285
					5.10896	0.000197054
					5.1151	0.000193305
					5.12124	0.000182703
					5.12739	0.000174959
					5.13353	0.000178447
					5.13967	0.000198701
					5.14582	0.000203576
					5.15196	0.000204998
					5.1581	0.000205728
					5.16425	0.000206458
					5.17039	0.000205908
					5.17653	0.000205359
					5.18268	0.000199326
					5.18882	0.000190784
					5.19497	0.000185146
					5.20111	0.000186052
					5.20725	0.000191762
					5.2134	0.000191773
					5.21954	0.000191783
					5.22568	0.000190954
					5.23183	0.000173745
					5.23797	0.000169656
					5.24411	0.000165568
					5.25026	0.000152507
					5.2564	0.000130204
					5.26254	0.000124517
					5.26869	0.000111117
					5.27483	0.000107178
					5.28098	0.000106138
					5.28712	0.000107795
					5.29326	0.000107212
					5.29941	0.000106629
					5.30555	9.37927e-05
					5.31169	8.68345e-05
					5.31784	7.55081e-05
					5.32398	5.72839e-05
					5.33012	4.17729e-05
					5.33627	3.52966e-05
					5.34241	3.80177e-05
					5.34855	4.76537e-05
					5.3547	5.64674e-05
					5.36084	6.41284e-05
					5.36699	6.56546e-05
					5.37313	6.63359e-05
					5.37927	6.6202e-05
					5.38542	6.60681e-05
					5.39156	5.97554e-05
					5.3977	5.983e-05
					5.40385	5.29084e-05
					5.40999	5.01789e-05
					5.41613	6.59118e-05
					5.42228	6.55086e-05
					5.42842	6.51055e-05
					5.43456	6.29334e-05
					5.44071	5.87821e-05
					5.44685	5.90906e-05
					5.453	5.9399e-05
					5.45914	5.5815e-05
					5.46528	5.10989e-05
					5.47143	4.03725e-05
					5.47757	1.97564e-05
					5.48371	1.94617e-05
					5.48986	2.26006e-05
					5.496	2.28375e-05
					5.50214	2.30744e-05
					5.50829	9.55103e-06
					5.51443	5.17621e-07
					5.52057	-1.25957e-07
					5.52672	-7.69535e-07
					5.53286	-2.03467e-05
					5.53901	-4.33641e-05
					5.54515	-6.90639e-05
					5.55129	-8.08307e-05
					5.55744	-7.64464e-05
					5.56358	-7.67173e-05
					5.56972	-7.69882e-05
					5.57587	-8.38236e-05
					5.58201	-9.14464e-05
					5.58815	-0.000101209
					5.5943	-0.000101391
					5.60044	-0.000111468
					5.60658	-0.000131885
					5.61273	-0.000145614
					5.61887	-0.000170001
					5.62502	-0.000173232
					5.63116	-0.000167287
					5.6373	-0.000167766
					5.64345	-0.000168244
					5.64959	-0.000170053
					5.65573	-0.000170724
					5.66188	-0.00017468
					5.66802	-0.000178636
					5.67416	-0.000188798
					5.68031	-0.000203569
					5.68645	-0.000200866
					5.69259	-0.000193737
					5.69874	-0.000188154
					5.70488	-0.000186256
					5.71103	-0.000184359
					5.71717	-0.000181769
					5.72331	-0.000179179
					5.72946	-0.000175264
					5.7356	-0.000174446
					5.74174	-0.000174667
					5.74789	-0.000174888
					5.75403	-0.000190298
					5.76017	-0.000192368
					5.76632	-0.000180914
					5.77246	-0.000176729
					5.77861	-0.000176707
					5.78475	-0.000176684
					5.79089	-0.000188022
					5.79704	-0.000189449
					5.80318	-0.000191373
					5.80932	-0.000193296
					5.81547	-0.000209347
					5.82161	-0.000226876
					5.82775	-0.000250583
					5.8339	-0.00026379
					5.84004	-0.000263075
					5.84618	-0.000263983
					5.85233	-0.000264891
					5.85847	-0.000268084
					5.86462	-0.000272995
					5.87076	-0.000275614
					5.8769	-0.000278233
					5.88305	-0.000287646
					5.88919	-0.000298252
					5.89533	-0.000300962
					5.90148	-0.000311249
					5.90762	-0.000305641
					5.91376	-0.000302334
					5.91991	-0.00030181
					5.92605	-0.000308722
					5.93219	-0.000315633
					5.93834	-0.000310574
					5.94448	-0.000310882
					5.95063	-0.00031119
					5.95677	-0.000325274
					5.96291	-0.00033693
					5.96906	-0.000348036
					5.9752	-0.000346641
					5.98134	-0.000341779
					5.98749	-0.000340704
					5.99363	-0.00034026
					5.99977	-0.000339815
					6.00592	-0.000331305
					6.01206	-0.000333058
					6.0182	-0.00033481
					6.02435	-0.000342356
					6.03049	-0.000349933
					6.03664	-0.000352242
					6.04278	-0.00036207
					6.04892	-0.000366051
					6.05507	-0.000364026
					6.06121	-0.000364838
					6.06735	-0.00036565
					6.0735	-0.000372072
					6.07964	-0.000372623
					6.08578	-0.000373173
					6.09193	-0.000379098
					6.09807	-0.000398674
					6.10421	-0.000408426
					6.11036	-0.000413557
					6.1165	-0.000409098
					6.12265	-0.000408666
					6.12879	-0.000408306
					6.13493	-0.000415129
					6.14108	-0.000421951
					6.14722	-0.000425688
					6.15336	-0.000428137
					6.15951	-0.000430587
					6.16565	-0.000447814
					6.17179	-0.000454561
					6.17794	-0.000456142
					6.18408	-0.000462427
					6.19022	-0.000462464
					6.19637	-0.000456903
					6.20251	-0.000456233
					6.20866	-0.00045615
					6.2148	-0.000456067
					6.22094	-0.000454618
					6.22709	-0.000455836
					6.23323	-0.000457054
					6.23937	-0.00045722
					6.24552	-0.000460606
					6.25166	-0.000473126
					6.2578	-0.000470908
					6.26395	-0.000463731
					6.27009	-0.000460321
					6.27623	-0.000456911
					6.28238	-0.00045326
					6.28852	-0.000446031
					6.29467	-0.000444123
					6.30081	-0.00045015
					6.30695	-0.000456176
					6.3131	-0.000455945
					6.31924	-0.000455715
					6.32538	-0.000457369
					6.33153	-0.000457741
					6.33767	-0.000458113
					6.34381	-0.00046288
					6.34996	-0.000466981
					6.3561	-0.000464414
					6.36224	-0.000464421
					6.36839	-0.000464429
					6.37453	-0.000465264
					6.38068	-0.000482909
					6.38682	-0.000491185
					6.39296	-0.000491934
					6.39911	-0.000496072
					6.40525	-0.000490136
					6.41139	-0.000489329
					6.41754	-0.000488521
					6.42368	-0.000484529
					6.42982	-0.000482282
					6.43597	-0.000483269
					6.44211	-0.000484255
					6.44825	-0.000500947
					6.4544	-0.000499891
					6.46054	-0.000497108
					6.46669	-0.000495615
					6.47283	-0.000501109
					6.47897	-0.000506603
					6.48512	-0.000505148
					6.49126	-0.000501397
					6.4974	-0.000497646
					6.50355	-0.000498275
					6.50969	-0.000498903
					6.51583	-0.000503436
					6.52198	-0.000507469
					6.52812	-0.000508732
					6.53426	-0.000494252
					6.54041	-0.000477342
					6.54655	-0.000475996
					6.5527	-0.000473777
					6.55884	-0.000470571
					6.56498	-0.000467365
					6.57113	-0.000467006
					6.57727	-0.000467047
					6.58341	-0.000467089
					6.58956	-0.00046981
					6.5957	-0.00048464
					6.60184	-0.000493115
					6.60799	-0.000484022
					6.61413	-0.000468328
					6.62027	-0.000469953
					6.62642	-0.000471577
					6.63256	-0.000475268
					6.63871	-0.000481018
					6.64485	-0.000483015
					6.65099	-0.000485809
					6.65714	-0.000503202
					6.66328	-0.000522031
					6.66942	-0.000535522
					6.67557	-0.000539802
					6.68171	-0.0005381
					6.68785	-0.000538482
					6.694	-0.000538864
					6.70014	-0.000540706
					6.70628	-0.000532694
					6.71243	-0.000532942
					6.71857	-0.00053319
					6.72472	-0.00053565
					6.73086	-0.000523354
					6.737	-0.000520573
					6.74315	-0.000517791
					6.74929	-0.000507902
					6.75543	-0.000489533
					6.76158	-0.000487731
					6.76772	-0.000487169
					6.77386	-0.000486608
					6.78001	-0.000483301
					6.78615	-0.000483029
					6.79229	-0.000482757
					6.79844	-0.000495506
					6.80458	-0.000501047
					6.81073	-0.000505266
					6.81687	-0.000510459
					6.82301	-0.000506121
					6.82916	-0.000506572
					6.8353	-0.000507023
					6.84144	-0.000510329
					6.84759	-0.000508391
					6.85373	-0.000511551
					6.85987	-0.00051471
					6.86602	-0.000522471
					6.87216	-0.000529754
					6.87831	-0.000526584
					6.88445	-0.000519708
					6.89059	-0.000511697
					6.89674	-0.000511216
					6.90288	-0.000510806
					6.90902	-0.00049938
					6.91517	-0.000497508
					6.92131	-0.000491538
					6.92745	-0.00049136
					6.9336	-0.000491181
					6.93974	-0.000491363
					6.94588	-0.000489302
					6.95203	-0.000488688
					6.95817	-0.000484083
					6.96432	-0.000465847
					6.97046	-0.000455416
					6.9766	-0.00045101
					6.98275	-0.000448595
					6.98889	-0.000446181
					6.99503	-0.000442987
					7.00118	-0.000441551
					7.00732	-0.000443483
					7.01346	-0.000445416
					7.01961	-0.000446506
					7.02575	-0.000444803
					7.03189	-0.000428362
					7.03804	-0.000423159
					7.04418	-0.000417955
					7.05033	-0.000410366
					7.05647	-0.000393403
					7.06261	-0.00038855
					7.06876	-0.000386001
					7.0749	-0.000386086
					7.08104	-0.000386171
					7.08719	-0.000391135
					7.09333	-0.000401878
					7.09947	-0.000395065
					7.10562	-0.000387652
					7.11176	-0.000385223
					7.1179	-0.000382794
					7.12405	-0.000381418
					7.13019	-0.000379699
					7.13634	-0.000381395
					7.14248	-0.000383092
					7.14862	-0.000387404
					7.15477	-0.00038826
					7.16091	-0.000389116
					7.16705	-0.000393587
					7.1732	-0.000380888
					7.17934	-0.00038028
					7.18548	-0.000379822
					7.19163	-0.000381074
					7.19777	-0.000382326
					7.20391	-0.000383998
					7.21006	-0.000385669
					7.2162	-0.000391678
					7.22235	-0.000395839
					7.22849	-0.000403692
					7.23463	-0.00040154
					7.24078	-0.000385111
					7.24692	-0.00037907
					7.25306	-0.00037749
					7.25921	-0.00037591
					7.26535	-0.000364692
					7.27149	-0.000345646
					7.27764	-0.000343852
					7.28378	-0.0003439
					7.28992	-0.000343947
					7.29607	-0.000335339
					7.30221	-0.000330019
					7.30836	-0.000320836
					7.3145	-0.000295586
					7.32064	-0.000286702
					7.32679	-0.000277818
					7.33293	-0.00027427
					7.33907	-0.000258113
					7.34522	-0.000256843
					7.35136	-0.000257951
					7.3575	-0.000259059
					7.36365	-0.000257262
					7.36979	-0.000246159
					7.37593	-0.000233079
					7.38208	-0.00021629
					7.38822	-0.000210314
					7.39437	-0.000206811
					7.40051	-0.000204944
					7.40665	-0.000203077
					7.4128	-0.000201512
					7.41894	-0.000203408
					7.42508	-0.000205303
					7.43123	-0.000213993
					7.43737	-0.000235557
					7.44351	-0.000239469
					7.44966	-0.000227626
					7.4558	-0.000221292
					7.46194	-0.000221555
					7.46809	-0.000221819
					7.47423	-0.000225236
					7.48038	-0.000224346
					7.48652	-0.000224205
					7.49266	-0.000224063
					7.49881	-0.000230387
					7.50495	-0.000238552
					7.51109	-0.000249173
					7.51724	-0.000242128
					7.52338	-0.000232484
					7.52952	-0.000231863
					7.53567	-0.000231156
					7.54181	-0.000228321
					7.54795	-0.000215873
					7.5541	-0.000211454
					7.56024	-0.000209526
					7.56639	-0.000212177
					7.57253	-0.000214829
					7.57867	-0.00021333
					7.58482	-0.00021146
					7.59096	-0.000195922
					7.5971	-0.000195331
					7.60325	-0.000195532
					7.60939	-0.000195732
					7.61553	-0.000195716
					7.62168	-0.000174804
					7.62782	-0.000177472
					7.63396	-0.000180139
					7.64011	-0.000187072
					7.64625	-0.000186358
					7.6524	-0.000175803
					7.65854	-0.000171528
					7.66468	-0.000159507
					7.67083	-0.000141519
					7.67697	-0.000136602
					7.68311	-0.0001322
					7.68926	-0.00011749
					7.6954	-9.01696e-05
					7.70154	-8.39289e-05
					7.70769	-7.76882e-05
					7.71383	-6.8918e-05
					7.71997	-5.70468e-05
					7.72612	-4.64143e-05
					7.73226	-1.53577e-05
					7.73841	1.79649e-06
					7.74455	9.1191e-06
					7.75069	3.13698e-05
					7.75684	4.48547e-05
					7.76298	5.92248e-05
					7.76912	8.19574e-05
					7.77527	8.39204e-05
					7.78141	8.58835e-05
					7.78755	0.000101363
					7.7937	0.000117329
					7.79984	0.000137677
					7.80598	0.000160377
					7.81213	0.00018254
					7.81827	0.000192768
					7.82442	0.000200092
					7.83056	0.000209744
					7.8367	0.000212782
					7.84285	0.000213241
					7.84899	0.00021025
					7.85513	0.000207259
					7.86128	0.000203321
					7.86742	0.000205207
					7.87356	0.000220868
					7.87971	0.000225928
					7.88585	0.000230988
					7.89199	0.000235755
					7.89814	0.000243542
					7.90428	0.000249665
					7.91043	0.000249569
					7.91657	0.000249472
					7.92271	0.000264032
					7.92886	0.000273593
					7.935	0.000274175
					7.94114	0.000297269
					7.94729	0.000325231
					7.95343	0.000335324
					7.95957	0.000341384
					7.96572	0.000357453
					7.97186	0.000374425
					7.97801	0.000385759
					7.98415	0.000386943
					7.99029	0.000388724
					7.99644	0.000399846
					8.00258	0.000400656
					8.00872	0.00040557
					8.01487	0.000426266
					8.02101	0.000434229
					8.02715	0.000436458
					8.0333	0.000439789
					8.03944	0.000442478
					8.04558	0.00044664
					8.05173	0.00044728
					8.05787	0.000447919
					8.06402	0.000453536
					8.07016	0.000456651
					8.0763	0.000459765
					8.08245	0.000462426
					8.08859	0.000471338
					8.09473	0.000471916
					8.10088	0.000470946
					8.10702	0.000469976
					8.11316	0.000463998
					8.11931	0.00046339
					8.12545	0.000462781
					8.13159	0.00045919
					8.13774	0.000455018
					8.14388	0.000446879
					8.15003	0.00044819
					8.15617	0.000453954
					8.16231	0.000455774
					8.16846	0.000454013
					8.1746	0.000452253
					8.18074	0.000457114
					8.18689	0.000479014
					8.19303	0.000478591
					8.19917	0.000478169
					8.20532	0.000475344
					8.21146	0.000474215
					8.2176	0.000488852
					8.22375	0.000506506
					8.22989	0.000515154
					8.23604	0.000522821
					8.24218	0.000531666
					8.24832	0.000538469
					8.25447	0.000540887
					8.26061	0.000539642
					8.26675	0.000538397
					8.2729	0.000524971
					8.27904	0.00051858
					8.28518	0.000505694
					8.29133	0.000508194
					8.29747	0.0005119
					8.30361	0.000513351
					8.30976	0.000506981
					8.3159	0.000500612
					8.32205	0.000510547
					8.32819	0.000506827
					8.33433	0.000503106
					8.34048	0.000495131
					8.34662	0.000484013
					8.35276	0.000474617
					8.35891	0.000474041
					8.36505	0.000479543
					8.37119	0.000482363
					8.37734	0.000480856
					8.38348	0.000479349
					8.38962	0.000479096
					8.39577	0.000476192
					8.40191	0.000473287
					8.40806	0.000464935
					8.4142	0.000471575
					8.42034	0.000475035
					8.42649	0.000478496
					8.43263	0.000488962
					8.43877	0.0005012
					8.44492	0.000518355
					8.45106	0.000522255
					8.4572	0.000526154
					8.46335	0.000543407
					8.46949	0.000552254
					8.47563	0.000553526
					8.48178	0.000554797
					8.48792	0.000557829
					8.49407	0.000559937
					8.50021	0.000572007
					8.50635	0.000585222
					8.5125	0.000591896
					8.51864	0.000594199
					8.52478	0.000596503
					8.53093	0.000600713
					8.53707	0.000622272
					8.54321	0.000622586
					8.54936	0.000622901
					8.5555	0.000621247
					8.56164	0.000613919
					8.56779	0.000627043
					8.57393	0.000649979
					8.58008	0.00065614
					8.58622	0.000662301
					8.59236	0.000674517
					8.59851	0.000695131
					8.60465	0.000698
					8.61079	0.000702939
					8.61694	0.000705742
					8.62308	0.000707299
					8.62922	0.000708235
					8.63537	0.00070917
					8.64151	0.00072959
					8.64765	0.000759458
					8.6538	0.000770485
					8.65994	0.000775971
					8.66609	0.00078725
					8.67223	0.000802856
					8.67837	0.000828387
					8.68452	0.000845763
					8.69066	0.000854589
					8.6968	0.000873508
					8.70295	0.000890723
					8.70909	0.000918112
					8.71523	0.000957701
					8.72138	0.000988528
					8.72752	0.00101342
					8.73366	0.00103968
					8.73981	0.00106548
					8.74595	0.00109701
					8.7521	0.00112344
					8.75824	0.00113702
					8.76438	0.00114817
					8.77053	0.00115934
					8.77667	0.00117207
					8.78281	0.00119583
					8.78896	0.00122945
					8.7951	0.00125743
					8.80124	0.00128349
					8.80739	0.00130351
					8.81353	0.00133548
					8.81967	0.00137697
					8.82582	0.00140167
					8.83196	0.00142364
					8.83811	0.00146034
					8.84425	0.00148758
					8.85039	0.00152441
					8.85654	0.00156637
					8.86268	0.00161439
					8.86882	0.00166799
					8.87497	0.0017204
					8.88111	0.0017681
					8.88725	0.00182861
					8.8934	0.00189672
					8.89954	0.00194542
					8.90568	0.00198614
					8.91183	0.00204008
					8.91797	0.00211486
					8.92412	0.0021912
					8.93026	0.00226648
					8.9364	0.00233702
					8.94255	0.00241882
					8.94869	0.00249001
					8.95483	0.00257521
					8.96098	0.00266668
					8.96712	0.0027514
					8.97326	0.00282298
					8.97941	0.00289681
					8.98555	0.00297876
					8.99169	0.00307669
					8.99784	0.00316909
					9.00398	0.00325058
					9.01013	0.00335522
					9.01627	0.00345349
					9.02241	0.00356451
					9.02856	0.00367071
					9.0347	0.00378558
					9.04084	0.00388533
					9.04699	0.00398894
					9.05313	0.00408344
					9.05927	0.00419333
					9.06542	0.00431303
					9.07156	0.00443491
					9.07771	0.00455409
					9.08385	0.00467246
					9.08999	0.00480025
					9.09614	0.00494392
					9.10228	0.00507451
					9.10842	0.00519263
					9.11457	0.00531924
					9.12071	0.00542487
					9.12685	0.00554449
					9.133	0.00567335
					9.13914	0.00582188
					9.14528	0.00595396
					9.15143	0.00609218
					9.15757	0.0062301
					9.16372	0.00639342
					9.16986	0.00654858
					9.176	0.00667644
					9.18215	0.00682868
					9.18829	0.00698753
					9.19443	0.00712798
					9.20058	0.00727075
					9.20672	0.00745116
					9.21286	0.00761334
					9.21901	0.00777534
					9.22515	0.00792614
					9.23129	0.00809886
					9.23744	0.00826798
					9.24358	0.00844333
					9.24973	0.00859944
					9.25587	0.00875985
					9.26201	0.00891102
					9.26816	0.00909441
					9.2743	0.00925867
					9.28044	0.00941196
					9.28659	0.00960158
					9.29273	0.0097985
					9.29887	0.00998345
					9.30502	0.0101645
					9.31116	0.0103789
					9.3173	0.0105644
					9.32345	0.0107397
					9.32959	0.0109156
					9.33574	0.0111006
					9.34188	0.0112753
					9.34802	0.0114738
					9.35417	0.0116645
					9.36031	0.0118693
					9.36645	0.0120584
					9.3726	0.0122385
					9.37874	0.012458
					9.38488	0.0126752
					9.39103	0.0128653
					9.39717	0.0130488
					9.40331	0.0132533
					9.40946	0.0134533
					9.4156	0.0136794
					9.42175	0.0138862
					9.42789	0.0141191
					9.43403	0.0143565
					9.44018	0.0146115
					9.44632	0.0148497
					9.45246	0.0151149
					9.45861	0.0153648
					9.46475	0.0156224
					9.47089	0.0158565
					9.47704	0.0161033
					9.48318	0.0163842
					9.48932	0.0166846
					9.49547	0.0169811
					9.50161	0.0172716
					9.50776	0.017604
					9.5139	0.0179169
					9.52004	0.0182653
					9.52619	0.0186042
					9.53233	0.0189596
					9.53847	0.0192907
					9.54462	0.0196413
					9.55076	0.0199787
					9.5569	0.0203549
					9.56305	0.020736
					9.56919	0.021111
					9.57533	0.0215372
					9.58148	0.021974
					9.58762	0.0224062
					9.59377	0.0228531
					9.59991	0.0233337
					9.60605	0.0237764
					9.6122	0.0242708
					9.61834	0.0247256
					9.62448	0.0252371
					9.63063	0.0257383
					9.63677	0.0263167
					9.64291	0.0268636
					9.64906	0.0274639
					9.6552	0.0280558
					9.66134	0.0287158
					9.66749	0.029359
					9.67363	0.0299738
					9.67978	0.0306494
					9.68592	0.0313274
					9.69206	0.0319775
					9.69821	0.0326644
					9.70435	0.0334355
					9.71049	0.0341615
					9.71664	0.0349776
					9.72278	0.0357616
					9.72892	0.0366204
					9.73507	0.0374955
					9.74121	0.0384005
					9.74735	0.0392462
					9.7535	0.0401552
					9.75964	0.0410161
					9.76579	0.0418904
					9.77193	0.0429252
					9.77807	0.0439789
					9.78422	0.0450002
					9.79036	0.046012
					9.7965	0.0471359
					9.80265	0.0482883
					9.80879	0.049547
					9.81493	0.0506702
					9.82108	0.0518893
					9.82722	0.0530447
					9.83336	0.0542853
					9.83951	0.0555303
					9.84565	0.0569032
					9.8518	0.0582541
					9.85794	0.0597343
					9.86408	0.0610995
					9.87023	0.0625356
					9.87637	0.064186
					9.88251	0.0657656
					9.88866	0.0672398
					9.8948	0.0687491
					9.90094	0.0703214
					9.90709	0.0719822
					9.91323	0.0739212
					9.91937	0.0756939
					9.92552	0.0775272
					9.93166	0.0793082
					9.93781	0.0813014
					9.94395	0.0835938
					9.95009	0.0856438
					9.95624	0.0875281
					9.96238	0.0893892
					9.96852	0.091406
					9.97467	0.093264
					9.98081	0.0956258
					9.98695	0.0978949
					9.9931	0.100203
					9.99924	0.102359
					10.0054	0.10471
					10.0115	0.106987
					10.0177	0.109534
					10.0238	0.111886
					10.03	0.114322
					10.0361	0.116637
					10.0422	0.118876
					10.0484	0.121407
					10.0545	0.124047
					10.0607	0.126617
					10.0668	0.129201
					10.073	0.132012
					10.0791	0.134686
					10.0853	0.137719
					10.0914	0.140561
					10.0975	0.14351
					10.1037	0.146397
					10.1098	0.149453
					10.116	0.152222
					10.1221	0.155272
					10.1283	0.158269
					10.1344	0.161255
					10.1405	0.164553
					10.1467	0.167793
					10.1528	0.17103
					10.159	0.174291
					10.1651	0.177715
					10.1713	0.180829
					10.1774	0.184164
					10.1835	0.187178
					10.1897	0.190567
					10.1958	0.193937
					10.202	0.197596
					10.2081	0.201016
					10.2143	0.20465
					10.2204	0.208208
					10.2266	0.212113
					10.2327	0.21571
					10.2388	0.219159
					10.245	0.222911
					10.2511	0.226495
					10.2573	0.230432
					10.2634	0.234521
					10.2696	0.238578
					10.2757	0.242471
					10.2818	0.24658
					10.288	0.250357
					10.2941	0.254598
					10.3003	0.25852
					10.3064	0.262539
					10.3126	0.266296
					10.3187	0.270214
					10.3249	0.273874
					10.331	0.277604
					10.3371	0.281826
					10.3433	0.286091
					10.3494	0.290263
					10.3556	0.29425
					10.3617	0.298611
					10.3679	0.302738
					10.374	0.307049
					10.3801	0.310893
					10.3863	0.31496
					10.3924	0.318684
					10.3986	0.32275
					10.4047	0.32668
					10.4109	0.330949
					10.417	0.335019
					10.4231	0.339285
					10.4293	0.343478
					10.4354	0.347823
					10.4416	0.352354
					10.4477	0.356512
					10.4539	0.360382
					10.46	0.364073
					10.4662	0.36804
					10.4723	0.371845
					10.4784	0.376071
					10.4846	0.380048
					10.4907	0.38424
					10.4969	0.388035
					10.503	0.392229
					10.5092	0.396262
					10.5153	0.400309
					10.5214	0.40401
					10.5276	0.407543
					10.5337	0.411247
					10.5399	0.414698
					10.546	0.4186
					10.5522	0.422199
					10.5583	0.426117
					10.5645	0.429644
					10.5706	0.433503
					10.5767	0.437126
					10.5829	0.44085
					10.589	0.444187
					10.5952	0.447633
					10.6013	0.450658
					10.6075	0.453866
					10.6136	0.457038
					10.6197	0.460358
					10.6259	0.463492
					10.632	0.46649
					10.6382	0.469687
					10.6443	0.472893
					10.6505	0.475877
					10.6566	0.478619
					10.6627	0.48146
					10.6689	0.483949
					10.675	0.486481
					10.6812	0.488923
					10.6873	0.491582
					10.6935	0.494059
					10.6996	0.496636
					10.7058	0.498872
					10.7119	0.501163
					10.718	0.50331
					10.7242	0.505268
					10.7303	0.507236
					10.7365	0.508925
					10.7426	0.510623
					10.7488	0.512147
					10.7549	0.513823
					10.761	0.515306
					10.7672	0.516829
					10.7733	0.51812
					10.7795	0.519401
					10.7856	0.520557
					10.7918	0.521667
					10.7979	0.522564
					10.804	0.523419
					10.8102	0.524118
					10.8163	0.52477
					10.8225	0.525349
					10.8286	0.525852
					10.8348	0.526313
					10.8409	0.526656
					10.8471	0.52688
					10.8532	0.526947
					10.8593	0.526975
					10.8655	0.52691
					10.8716	0.526846
					10.8778	0.526617
					10.8839	0.5263
					10.8901	0.525943
					10.8962	0.525465
					10.9023	0.524941
					10.9085	0.52429
					10.9146	0.523585
					10.9208	0.522797
					10.9269	0.521801
					10.9331	0.520811
					10.9392	0.519681
					10.9454	0.518615
					10.9515	0.51742
					10.9576	0.516259
					10.9638	0.514882
					10.9699	0.513531
					10.9761	0.512006
					10.9822	0.510476
					10.9884	0.508777
					10.9945	0.507092
					11.0006	0.505174
					11.0068	0.503353
					11.0129	0.501419
					11.0191	0.499583
					11.0252	0.497812
					11.0314	0.495735
					11.0375	0.493466
					11.0436	0.491312
					11.0498	0.489207
					11.0559	0.486869
					11.0621	0.484621
					11.0682	0.482055
					11.0744	0.479633
					11.0805	0.477101
					11.0867	0.474766
					11.0928	0.472345
					11.0989	0.470027
					11.1051	0.467413
					11.1112	0.464842
					11.1174	0.462279
					11.1235	0.459451
					11.1297	0.456841
					11.1358	0.453832
					11.1419	0.451009
					11.1481	0.448094
					11.1542	0.445365
					11.1604	0.44248
					11.1665	0.439907
					11.1727	0.437007
					11.1788	0.434143
					11.185	0.431093
					11.1911	0.428171
					11.1972	0.425117
					11.2034	0.422084
					11.2095	0.418771
					11.2157	0.415776
					11.2218	0.412817
					11.228	0.409677
					11.2341	0.406724
					11.2402	0.403925
					11.2464	0.400926
					11.2525	0.397689
					11.2587	0.394606
					11.2648	0.391404
					11.271	0.388345
					11.2771	0.384922
					11.2832	0.381678
					11.2894	0.378646
					11.2955	0.375383
					11.3017	0.37247
					11.3078	0.369365
					11.314	0.366384
					11.3201	0.363063
					11.3263	0.359983
					11.3324	0.356622
					11.3385	0.353584
					11.3447	0.350183
					11.3508	0.346706
					11.357	0.343097
					11.3631	0.340041
					11.3693	0.336882
					11.3754	0.333999
					11.3815	0.330896
					11.3877	0.327821
					11.3938	0.324602
					11.4	0.321495
					11.4061	0.318256
					11.4123	0.315139
					11.4184	0.311942
					11.4246	0.308538
					11.4307	0.305371
					11.4368	0.302452
					11.443	0.29961
					11.4491	0.296599
					11.4553	0.293696
					11.4614	0.290671
					11.4676	0.287251
					11.4737	0.284019
					11.4798	0.281101
					11.486	0.278096
					11.4921	0.274776
					11.4983	0.271858
					11.5044	0.268789
					11.5106	0.266077
					11.5167	0.263262
					11.5228	0.260596
					11.529	0.257577
					11.5351	0.254811
					11.5413	0.251834
					11.5474	0.249056
					11.5536	0.245998
					11.5597	0.243001
					11.5659	0.239841
					11.572	0.237078
					11.5781	0.234309
					11.5843	0.231809
					11.5904	0.228886
					11.5966	0.225571
					11.6027	0.222978
					11.6089	0.22016
					11.615	0.217619
					11.6211	0.214879
					11.6273	0.212236
					11.6334	0.209433
					11.6396	0.206931
					11.6457	0.204373
					11.6519	0.202033
					11.658	0.19983
					11.6642	0.197359
					11.6703	0.194846
					11.6764	0.19247
					11.6826	0.190149
					11.6887	0.187668
					11.6949	0.18533
					11.701	0.182732
					11.7072	0.180448
					11.7133	0.178081
					11.7194	0.175974
					11.7256	0.173798
					11.7317	0.171792
					11.7379	0.169543
					11.744	0.167408
					11.7502	0.165125
					11.7563	0.163075
					11.7624	0.160874
					11.7686	0.158716
					11.7747	0.156507
					11.7809	0.154501
					11.787	0.152592
					11.7932	0.150603
					11.7993	0.148761
					11.8055	0.14655
					11.8116	0.144564
					11.8177	0.142561
					11.8239	0.140729
					11.83	0.138822
					11.8362	0.136952
					11.8423	0.134952
					11.8485	0.133146
					11.8546	0.131452
					11.8607	0.129673
					11.8669	0.128026
					11.873	0.126428
					11.8792	0.124804
					11.8853	0.123048
					11.8915	0.121444
					11.8976	0.119743
					11.9037	0.118172
					11.9099	0.116411
					11.916	0.114846
					11.9222	0.113242
					11.9283	0.111803
					11.9345	0.110353
					11.9406	0.109019
					11.9468	0.107526
					11.9529	0.10614
					11.959	0.104684
					11.9652	0.103337
					11.9713	0.101931
					11.9775	0.100544
					11.9836	0.0991845
					11.9898	0.0977471
					11.9959	0.096227
					12.002	0.0948971
					12.0082	0.0938064
					12.0143	0.092592
					12.0205	0.0914363
					12.0266	0.0901901
					12.0328	0.0890218
					12.0389	0.087825
					12.0451	0.086701
					12.0512	0.0855474
					12.0573	0.0843528
					12.0635	0.083248
					12.0696	0.0821469
					12.0758	0.0809984
					12.0819	0.0798618
					12.0881	0.0789029
					12.0942	0.0778473
					12.1003	0.0768943
					12.1065	0.0758766
					12.1126	0.074951
					12.1188	0.0737971
					12.1249	0.0726631
					12.1311	0.0716408
					12.1372	0.070792
					12.1433	0.0699379
					12.1495	0.0691946
					12.1556	0.0683638
					12.1618	0.0675641
					12.1679	0.066726
					12.1741	0.0659416
					12.1802	0.0652029
					12.1864	0.0643856
					12.1925	0.0636193
					12.1986	0.0628193
					12.2048	0.0621331
					12.2109	0.0614376
					12.2171	0.0608417
					12.2232	0.0601975
					12.2294	0.0595544
					12.2355	0.0588888
					12.2416	0.0582559
					12.2478	0.0576603
					12.2539	0.0570241
					12.2601	0.0563848
					12.2662	0.0557786
					12.2724	0.0552126
					12.2785	0.0546295
					12.2847	0.0541349
					12.2908	0.0536281
					12.2969	0.0531446
					12.3031	0.0526044
					12.3092	0.052112
					12.3154	0.0516073
					12.3215	0.0511553
					12.3277	0.0506431
					12.3338	0.0501596
					12.3399	0.0496826
					12.3461	0.0492618
					12.3522	0.0488332
					12.3584	0.04846
					12.3645	0.0480699
					12.3707	0.0476776
					12.3768	0.0472932
					12.3829	0.0468913
					12.3891	0.046539
					12.3952	0.0461366
					12.4014	0.0457412
					12.4075	0.0453452
					12.4137	0.0450094
					12.4198	0.0446639
					12.426	0.0443639
					12.4321	0.0440729
					12.4382	0.0437832
					12.4444	0.043489
					12.4505	0.0431663
					12.4567	0.0428638
					12.4628	0.0425872
					12.469	0.0423042
					12.4751	0.0419824
					12.4812	0.0417114
					12.4874	0.0414475
					12.4935	0.0412183
					12.4997	0.0409821
					12.5058	0.0407607
					12.512	0.0405148
					12.5181	0.0402953
					12.5243	0.0400579
					12.5304	0.03984
					12.5365	0.0396176
					12.5427	0.0394059
					12.5488	0.0391876
					12.555	0.0389931
					12.5611	0.0388035
					12.5673	0.0386443
					12.5734	0.0384846
					12.5795	0.038294
					12.5857	0.0381218
					12.5918	0.0379426
					12.598	0.0377791
					12.6041	0.0376018
					12.6103	0.0374364
					12.6164	0.0372445
					12.6225	0.0370664
					12.6287	0.0368922
					12.6348	0.0367574
					12.641	0.0366479
					12.6471	0.0365088
					12.6533	0.0363675
					12.6594	0.0362339
					12.6656	0.0361023
					12.6717	0.0359822
					12.6778	0.0358722
					12.684	0.0357311
					12.6901	0.0356095
					12.6963	0.035494
					12.7024	0.0353946
					12.7086	0.0353099
					12.7147	0.035231
					12.7208	0.0351386
					12.727	0.0350446
					12.7331	0.0349372
					12.7393	0.0348567
					12.7454	0.0347656
					12.7516	0.0346547
					12.7577	0.0345623
					12.7639	0.0344933
					12.77	0.0344094
					12.7761	0.0343329
					12.7823	0.0342883
					12.7884	0.0342394
					12.7946	0.0341751
					12.8007	0.0340995
					12.8069	0.0340399
					12.813	0.03399
					12.8191	0.0339369
					12.8253	0.0338609
					12.8314	0.033801
					12.8376	0.0337588
					12.8437	0.0336979
					12.8499	0.0336518
					12.856	0.0336247
					12.8621	0.0335924
					12.8683	0.0335496
					12.8744	0.0335017
					12.8806	0.0334571
					12.8867	0.0334276
					12.8929	0.0333751
					12.899	0.033323
					12.9052	0.033283
					12.9113	0.0332477
					12.9174	0.0332319
					12.9236	0.0332157
					12.9297	0.0331904
					12.9359	0.0331687
					12.942	0.0331394
					12.9482	0.0331113
					12.9543	0.0330955
					12.9604	0.0330865
					12.9666	0.0330519
					12.9727	0.033008
					12.9789	0.0329755
					12.985	0.0329547
					12.9912	0.0329527
					12.9973	0.0329506
					13.0034	0.0329347
					13.0096	0.0329136
					13.0157	0.0328976
					13.0219	0.0328832
					13.028	0.0328675
					13.0342	0.0328522
					13.0403	0.0328224
					13.0465	0.0327943
					13.0526	0.0327842
					13.0587	0.0327865
					13.0649	0.0327851
					13.071	0.0327837
					13.0772	0.0327738
					13.0833	0.03277
					13.0895	0.0327669
					13.0956	0.0327671
					13.1017	0.0327594
					13.1079	0.0327399
					13.114	0.0327292
					13.1202	0.0327338
					13.1263	0.0327402
					13.1325	0.0327573
					13.1386	0.0327724
					13.1448	0.0327772
					13.1509	0.0327842
					13.157	0.0327977
					13.1632	0.0328196
					13.1693	0.0328314
					13.1755	0.0328417
					13.1816	0.0328492
					13.1878	0.0328511
					13.1939	0.0328682
					13.2	0.0328988
					13.2062	0.0329322
					13.2123	0.0329527
					13.2185	0.0329697
					13.2246	0.0329901
					13.2308	0.0330143
					13.2369	0.033043
					13.243	0.0330612
					13.2492	0.0330677
					13.2553	0.033085
					13.2615	0.0331023
					13.2676	0.0331285
					13.2738	0.0331699
					13.2799	0.0331955
					13.2861	0.0332293
					13.2922	0.0332537
					13.2983	0.0332951
					13.3045	0.0333446
					13.3106	0.033385
					13.3168	0.0334058
					13.3229	0.0334169
					13.3291	0.0334502
					13.3352	0.0334894
					13.3413	0.0335337
					13.3475	0.0335739
					13.3536	0.0336158
					13.3598	0.0336562
					13.3659	0.0336923
					13.3721	0.0337377
					13.3782	0.0337798
					13.3844	0.0338037
					13.3905	0.0338322
					13.3966	0.033862
					13.4028	0.0339015
					13.4089	0.0339587
					13.4151	0.0340101
					13.4212	0.0340542
					13.4274	0.0341084
					13.4335	0.0341659
					13.4396	0.0342091
					13.4458	0.0342712
					13.4519	0.0343277
					13.4581	0.0343664
					13.4642	0.0343991
					13.4704	0.0344533
					13.4765	0.0345152
					13.4826	0.0345829
					13.4888	0.0346372
					13.4949	0.0346869
					13.5011	0.0347389
					13.5072	0.0347855
					13.5134	0.0348421
					13.5195	0.0348997
					13.5257	0.0349455
					13.5318	0.0349791
					13.5379	0.0350131
					13.5441	0.0350546
					13.5502	0.0351197
					13.5564	0.035189
					13.5625	0.0352473
					13.5687	0.035283
					13.5748	0.0353241
					13.5809	0.035382
					13.5871	0.0354433
					13.5932	0.0354865
					13.5994	0.0355212
					13.6055	0.0355582
					13.6117	0.0355965
					13.6178	0.0356444
					13.624	0.0357043
					13.6301	0.0357578
					13.6362	0.0357974
					13.6424	0.035848
					13.6485	0.0358875
					13.6547	0.0359364
					13.6608	0.0359855
					13.667	0.0360274
					13.6731	0.0360618
					13.6792	0.0360963
					13.6854	0.0361343
					13.6915	0.0361856
					13.6977	0.036241
					13.7038	0.0362888
					13.71	0.0363284
					13.7161	0.0363648
					13.7222	0.0364096
					13.7284	0.0364677
					13.7345	0.0365054
					13.7407	0.0365246
					13.7468	0.0365514
					13.753	0.0365843
					13.7591	0.03664
					13.7653	0.0366919
					13.7714	0.0367278
					13.7775	0.0367656
					13.7837	0.0368055
					13.7898	0.0368365
					13.796	0.0368742
					13.8021	0.0369097
					13.8083	0.0369373
					13.8144	0.0369641
					13.8205	0.0369961
					13.8267	0.0370395
					13.8328	0.0370858
					13.839	0.0371311
					13.8451	0.0371612
					13.8513	0.0371986
					13.8574	0.037236
					13.8636	0.0372776
					13.8697	0.03732
					13.8758	0.0373521
					13.882	0.0373766
					13.8881	0.0374046
					13.8943	0.0374285
					13.9004	0.0374763
					13.9066	0.0375314
					13.9127	0.0375591
					13.9188	0.037584
					13.925	0.0376239
					13.9311	0.0376706
					13.9373	0.0377011
					13.9434	0.0377191
					13.9496	0.0377446
					13.9557	0.0377751
					13.9618	0.0377946
					13.968	0.0378249
					13.9741	0.0378801
					13.9803	0.0379288
					13.9864	0.0379581
					13.9926	0.0379899
					13.9987	0.0380313
					14.0049	0.0380859
					14.011	0.0381226
					14.0171	0.038147
					14.0233	0.0381818
					14.0294	0.0382123
					14.0356	0.0382319
					14.0417	0.0382709
					14.0479	0.0383386
					14.054	0.0383769
					14.0601	0.0384147
					14.0663	0.0384625
					14.0724	0.0385098
					14.0786	0.038562
					14.0847	0.038603
					14.0909	0.0386282
					14.097	0.0386656
					14.1031	0.0387182
					14.1093	0.0387756
					14.1154	0.0388378
					14.1216	0.0388916
					14.1277	0.0389486
					14.1339	0.0389903
					14.14	0.0390316
					14.1462	0.0390876
					14.1523	0.039141
					14.1584	0.0391755
					14.1646	0.0392135
					14.1707	0.0392615
					14.1769	0.0393086
					14.183	0.0393695
					14.1892	0.0394236
					14.1953	0.0394732
					14.2014	0.0395209
					14.2076	0.0395667
					14.2137	0.0396201
					14.2199	0.0396822
					14.226	0.0397161
					14.2322	0.0397582
					14.2383	0.0398032
					14.2445	0.0398486
					14.2506	0.0399057
					14.2567	0.0399708
					14.2629	0.0400227
					14.269	0.0400734
					14.2752	0.0401404
					14.2813	0.0402018
					14.2875	0.0402658
					14.2936	0.0403268
					14.2997	0.0403752
					14.3059	0.0404253
					14.312	0.040483
					14.3182	0.0405436
					14.3243	0.0406368
					14.3305	0.0407167
					14.3366	0.0407911
					14.3427	0.0408655
					14.3489	0.0409408
					14.355	0.0410226
					14.3612	0.0410986
					14.3673	0.0411691
					14.3735	0.0412439
					14.3796	0.0413161
					14.3858	0.0413746
					14.3919	0.0414587
					14.398	0.0415588
					14.4042	0.0416524
					14.4103	0.0417239
					14.4165	0.0418078
					14.4226	0.0418976
					14.4288	0.0420041
					14.4349	0.0420918
					14.441	0.042167
					14.4472	0.0422375
					14.4533	0.0423125
					14.4595	0.0423902
					14.4656	0.0424862
					14.4718	0.0425914
					14.4779	0.0426797
					14.4841	0.0427601
					14.4902	0.042847
					14.4963	0.042955
					14.5025	0.043054
					14.5086	0.0431334
					14.5148	0.043215
					14.5209	0.0433227
					14.5271	0.043414
					14.5332	0.0435229
					14.5393	0.0436294
					14.5455	0.0437256
					14.5516	0.0438186
					14.5578	0.0439122
					14.5639	0.0440162
					14.5701	0.0441327
					14.5762	0.0442374
					14.5823	0.0443163
					14.5885	0.0444024
					14.5946	0.0444987
					14.6008	0.0446029
					14.6069	0.0446997
					14.6131	0.0448125
					14.6192	0.0449227
					14.6254	0.0450361
					14.6315	0.0451437
					14.6376	0.0452587
					14.6438	0.0453607
					14.6499	0.0454654
					14.6561	0.0455614
					14.6622	0.0456622
					14.6684	0.0457779
					14.6745	0.0459104
					14.6806	0.0460276
					14.6868	0.0461354
					14.6929	0.0462545
					14.6991	0.0463678
					14.7052	0.0464996
					14.7114	0.0466231
					14.7175	0.0467479
					14.7237	0.0468533
					14.7298	0.0469677
					14.7359	0.0470821
					14.7421	0.0472259
					14.7482	0.0473634
					14.7544	0.0474862
					14.7605	0.0476226
					14.7667	0.0477544
					14.7728	0.0478843
[truncated: 1,157 more rows]

## Sheet: SEC-MALS QT23-OD
volume (mL)	Molar Mass 1	volume (mL)	Molar Mass 2	volume (mL)	Molar Mass 3	volume (mL)	Molar Mass 4		volume (mL)	RI
15.9585	26142.4	10.6482	108189	10.0748	132639	8.94583	267180		2.24227	1.49903e-05
15.9645	26101.8	10.6542	108332	10.0808	132323	8.95181	266072		2.24841	-6.41454e-06
15.9704	26057.4	10.6602	108209	10.0867	131970	8.95778	264805		2.25455	-8.88494e-06
15.9764	26048.6	10.6661	108068	10.0927	131641	8.96375	263399		2.2607	-1.96582e-06
15.9824	26045.8	10.6721	107916	10.0987	131310	8.96973	262286		2.26684	8.66069e-06
15.9884	26088.8	10.6781	107749	10.1047	130986	8.9757	261587		2.27298	1.14407e-05
15.9943	26116.7	10.6841	107556	10.1106	130649	8.98167	261058		2.27913	1.42207e-05
16.0003	26093.5	10.69	107368	10.1166	130271	8.98765	259918		2.28527	1.81823e-05
16.0063	26051.2	10.696	107195	10.1226	129877	8.99362	258837		2.29141	5.47871e-05
16.0122	26026.7	10.702	107023	10.1285	129492	8.99959	257501		2.29756	5.61026e-05
16.0182	25959.2	10.708	106830	10.1345	129122	9.00557	256533		2.3037	5.53965e-05
16.0242	25878.3	10.7139	106689	10.1405	128762	9.01154	255505		2.30985	5.46903e-05
16.0302	25846.1	10.7199	106544	10.1465	128410	9.01751	254570		2.31599	4.07481e-05
16.0361	25770	10.7259	106410	10.1524	128074	9.02349	253382		2.32213	1.68533e-05
16.0421	25745.1	10.7319	106252	10.1584	127757	9.02946	252342		2.32828	1.03152e-05
16.0481	25698.6	10.7378	106098	10.1644	127438	9.03543	251333		2.33442	3.07539e-05
16.0541	25685.6	10.7438	105912	10.1704	127117	9.04141	250441		2.34056	4.63148e-05
16.06	25645.6	10.7498	105740	10.1763	126790	9.04738	249477		2.34671	5.64241e-05
16.066	25693.9	10.7557	105566	10.1823	126438	9.05335	248562		2.35285	7.3711e-05
16.072	25703.3	10.7617	105412	10.1883	126078	9.05933	247673		2.35899	0.000105696
16.078	25684.4	10.7677	105258	10.1943	125728	9.0653	246605		2.36514	0.000111535
16.0839	25662.5	10.7737	105100	10.2002	125416	9.07127	245607		2.37128	0.000112897
16.0899	25563.8	10.7796	104933	10.2062	125114	9.07725	244710		2.37743	0.000101727
16.0959	25488.7	10.7856	104741	10.2122	124814	9.08322	243878		2.38357	9.05572e-05
16.1018	25442.1	10.7916	104554	10.2181	124481	9.08919	242805		2.38971	7.56845e-05
16.1078	25381.1	10.7976	104390	10.2241	124160	9.09517	241344		2.39586	7.47626e-05
16.1138	25254.8	10.8035	104243	10.2301	123862	9.10114	239975		2.402	8.30736e-05
16.1198	25215.3	10.8095	104089	10.2361	123598	9.10711	238956		2.40814	9.69176e-05
16.1257	25141.9	10.8155	103919	10.242	123330	9.11309	238135		2.41429	0.0001054
16.1317	25120.4	10.8214	103747	10.248	123036	9.11906	237285		2.42043	0.000109707
16.1377	25069	10.8274	103580	10.254	122743	9.12503	236475		2.42657	0.00013234
16.1437	25028	10.8334	103430	10.26	122450	9.13101	235595		2.43272	0.000169799
16.1496	24953.2	10.8394	103289	10.2659	122181	9.13698	234609		2.43886	0.000165323
16.1556	24904.8	10.8453	103144	10.2719	121889	9.14295	233667		2.44501	0.000160847
16.1616	24847	10.8513	102974	10.2779	121625	9.14892	232810		2.45115	0.000149522
16.1676	24781.9	10.8573	102799	10.2839	121345	9.1549	232003		2.45729	0.000133847
16.1735	24686.8	10.8633	102634	10.2898	121079	9.16087	231162		2.46344	0.000126836
16.1795	24588.4	10.8692	102491	10.2958	120816	9.16684	230371		2.46958	0.00013142
16.1855	24528.9	10.8752	102352	10.3018	120578	9.17282	229592		2.47572	0.000137794
16.1914	24465.8	10.8812	102207	10.3077	120345	9.17879	228851		2.48187	0.000141556
16.1974	24393	10.8872	102039	10.3137	120087	9.18476	228015		2.48801	0.000143522
16.2034	24355.3	10.8931	101865	10.3197	119811	9.19074	227234		2.49415	0.000151143
16.2094	24340.4	10.8991	101703	10.3257	119537	9.19671	226372		2.5003	0.000176955
16.2153	24298.4	10.9051	101537	10.3316	119278	9.20268	225544		2.50644	0.000179153
16.2213	24234.1	10.911	101365	10.3376	119012	9.20866	224728		2.51259	0.000178323
16.2273	24173.5	10.917	101193	10.3436	118767	9.21463	223884		2.51873	0.000177492
16.2333	24097.2	10.923	101024	10.3496	118495	9.2206	223103		2.52487	0.00015072
16.2392	24036.5	10.929	100869	10.3555	118194	9.22658	222308		2.53102	0.000120628
16.2452	23956.7	10.9349	100703	10.3615	117909	9.23255	221514		2.53716	0.000121895
16.2512	23896.8	10.9409	100535	10.3675	117670	9.23852	220752		2.5433	0.000127668
16.2572	23828.4	10.9469	100376	10.3735	117445	9.2445	220026		2.54945	0.000130351
16.2631	23784.9	10.9529	100220	10.3794	117225	9.25047	219333		2.55559	0.000133034
16.2691	23738.7	10.9588	100031	10.3854	117013	9.25644	218605		2.56173	0.000141732
16.2751	23712.6	10.9648	99824.1	10.3914	116787	9.26242	217882		2.56788	0.000172604
16.281	23686	10.9708	99632.9	10.3973	116549	9.26839	217210		2.57402	0.000194474
16.287	23623.2	10.9768	99449.2	10.4033	116329	9.27436	216423		2.58017	0.00019389
16.293	23564.7	10.9827	99260.6	10.4093	116130	9.28034	215551		2.58631	0.000193307
16.299	23517.5	10.9887	99086.6	10.4153	115926	9.28631	214709		2.59245	0.000188652
16.3049	23470.4	10.9947	98927.7	10.4212	115707	9.29228	213939		2.5986	0.000160972
16.3109	23394.2	11.0006	98756.4	10.4272	115449	9.29826	213191		2.60474	0.000144404
16.3169	23336.4	11.0066	98579.5	10.4332	115324	9.30423	212452		2.61088	0.000142748
16.3229	23252.7	11.0126	98385.3			9.3102	211721		2.61703	0.000147676
16.3288	23207.3	11.0186	98181.2			9.31618	211000		2.62317	0.000153102
16.3348	23148.2	11.0245	97972			9.32215	210280		2.62931	0.000158527
16.3408	23108	11.0305	97760.5			9.32812	209495		2.63546	0.000183104
16.3468	23061.6	11.0365	97563.4			9.3341	208671		2.6416	0.000222483
16.3527	23016.7	11.0425	97390			9.34007	207570		2.64775	0.000230398
16.3587	22953	11.0484	97223.1						2.65389	0.000233858
16.3647	22896.3	11.0544	97041						2.66003	0.000222038
16.3706	22836.5	11.0604	96871.9						2.66618	0.000210218
16.3766	22785.5	11.0664	96699.8						2.67232	0.000177664
16.3826	22738.2	11.0723	96507.7						2.67846	0.000184715
16.3886	22672	11.0783	96318.4						2.68461	0.000191198
16.3945	22599.5	11.0843	96130.6						2.69075	0.000197681
16.4005	22544.2	11.0902	95955.3						2.69689	0.000204839
16.4065	22499.8	11.0962	95805.3						2.70304	0.000223866
16.4125	22454.5	11.1022	95673.5						2.70918	0.000261349
16.4184	22410.5	11.1082	95510						2.71533	0.000273882
16.4244	22363.5	11.1141	95346.4						2.72147	0.000280044
16.4304	22312.4	11.1201	95153.3						2.72761	0.000272709
16.4364	22261.9	11.1261	95000.2						2.73376	0.000265373
16.4423	22212.7	11.1321	94818						2.7399	0.000250645
16.4483	22169.6	11.138	94668.3						2.74604	0.000254079
16.4543	22126.1	11.144	94492.7						2.75219	0.000261389
16.4602	22084.8	11.15	94305.6						2.75833	0.000266917
16.4662	22040.8	11.156	94099.9						2.76447	0.000272445
16.4722	21998.5	11.1619	93901.4						2.77062	0.000274968
16.4782	21957.5	11.1679	93676.6						2.77676	0.00030756
16.4841	21920	11.1739	93464.5						2.78291	0.000306311
16.4901	21883.9	11.1798	93307.3						2.78905	0.000305063
16.4961	21851								2.79519	0.000299316
16.5021	21812.5								2.80134	0.000282274
16.508	21761.1								2.80748	0.000261778
16.514	21718.6								2.81362	0.000250722
16.52	21678.9								2.81977	0.000247875
16.526	21638.1								2.82591	0.000245027
16.5319	21602.2								2.83205	0.000252556
16.5379	21564.7								2.8382	0.000265929
16.5439	21528.1								2.84434	0.000267571
16.5498	21483								2.85049	0.000290102
16.5558	21440.5								2.85663	0.000310898
16.5618	21400.6								2.86277	0.00030605
16.5678	21361.9								2.86892	0.000301201
16.5737	21323								2.87506	0.00028862
16.5797	21281.1								2.8812	0.00026903
16.5857	21243.7								2.88735	0.00026511
16.5917	21209.3								2.89349	0.000273432
16.5976	21184								2.89963	0.000279498
16.6036	21161.9								2.90578	0.000281642
16.6096	21141.6								2.91192	0.000283787
16.6156	21110.6								2.91807	0.000298788
16.6215	21066.5								2.92421	0.000319702
16.6275	21026								2.93035	0.000330338
16.6335	20993.7								2.9365	0.000326752
16.6394	20962.8								2.94264	0.000323167
16.6454	20927.1								2.94878	0.000299087
16.6514	20893.9								2.95493	0.00029183
16.6574	20867.3								2.96107	0.000293126
16.6633	20835.6								2.96721	0.000294955
16.6693	20804.3								2.97336	0.000311079
16.6753	20783								2.9795	0.000315268
16.6813	20764.9								2.98565	0.000321874
16.6872	20732.5								2.99179	0.000338352
16.6932	20701.1								2.99793	0.000346162
16.6992	20641.3								3.00408	0.000340006
16.7052	20603.8								3.01022	0.00033385
16.7111	20563.3								3.01636	0.000308926
16.7171	20540.2								3.02251	0.000284429
16.7231	20493.5								3.02865	0.000274732
16.729	20465.7								3.03479	0.000277084
16.735	20429.3								3.04094	0.000280468
16.741	20425.6								3.04708	0.000283111
16.747	20399.1								3.05323	0.000285753
16.7529	20354.5								3.05937	0.000310101
16.7589	20334.2								3.06551	0.000344373
16.7649	20307.5								3.07166	0.00034
16.7709	20261.7								3.0778	0.000335628
16.7768	20216.5								3.08394	0.000325006
16.7828	20191								3.09009	0.000297074
16.7888	20156.8								3.09623	0.000291396
16.7948	20131.2								3.10237	0.000292286
16.8007	20103.4								3.10852	0.000290721
16.8067	20092.5								3.11466	0.000289156
16.8127	20070.6								3.12081	0.000284382
16.8186	20047.5								3.12695	0.000308021
16.8246	20023.4								3.13309	0.000328176
16.8306	19996.5								3.13924	0.000337911
16.8366	19964.6								3.14538	0.000335083
16.8425	19926.5								3.15152	0.000332254
16.8485	19900.1								3.15767	0.000305345
16.8545	19876.7								3.16381	0.000293418
16.8605	19844								3.16995	0.000306222
16.8664	19811.7								3.1761	0.000319925
16.8724	19768.4								3.18224	0.000333851
16.8784	19746.7								3.18839	0.000341516
16.8844	19715.6								3.19453	0.000355125
16.8903	19697.4								3.20067	0.000380311
16.8963	19648.3								3.20682	0.000388534
16.9023	19605.5								3.21296	0.000390885
16.9082	19545.4								3.2191	0.000376763
16.9142	19520.9								3.22525	0.000362642
16.9202	19497.8								3.23139	0.000331846
16.9262	19497.6								3.23753	0.000328962
16.9321	19466.5								3.24368	0.000344748
16.9381	19445.3								3.24982	0.000352093
16.9441	19411.2								3.25597	0.000359437
16.9501	19382.6								3.26211	0.000362829
16.956	19380.8								3.26825	0.000383746
16.962	19359.6								3.2744	0.000409159
16.968	19316.3								3.28054	0.000406288
16.974	19247.5								3.28668	0.000403417
16.9799	19204.1								3.29283	0.000393527
16.9859	19153.4								3.29897	0.000365614
									3.30511	0.00035215
10.6482	108189								3.31126	0.000347764
10.6542	108332								3.3174	0.000352276
10.6602	108209								3.32355	0.000353071
10.6661	108068								3.32969	0.000353867
10.6721	107916								3.33583	0.000370919
10.6781	107749								3.34198	0.00039468
10.6841	107556								3.34812	0.000400525
10.69	107368								3.35426	0.000399889
10.696	107195								3.36041	0.000399254
10.702	107023								3.36655	0.000354026
10.708	106830								3.37269	0.000325731
10.7139	106689								3.37884	0.000326685
10.7199	106544								3.38498	0.000327349
10.7259	106410								3.39113	0.000328014
10.7319	106252								3.39727	0.000329188
10.7378	106098								3.40341	0.000330362
10.7438	105912								3.40956	0.000344829
10.7498	105740								3.4157	0.000358744
10.7557	105566								3.42184	0.000361871
10.7617	105412								3.42799	0.000351692
10.7677	105258								3.43413	0.000341513
10.7737	105100								3.44027	0.000323446
10.7796	104933								3.44642	0.00031428
10.7856	104741								3.45256	0.000316187
10.7916	104554								3.45871	0.000320051
10.7976	104390								3.46485	0.000321394
10.8035	104243								3.47099	0.000322737
10.8095	104089								3.47714	0.000337659
10.8155	103919								3.48328	0.000371947
10.8214	103747								3.48942	0.000365693
10.8274	103580								3.49557	0.000359439
10.8334	103430								3.50171	0.000345512
10.8394	103289								3.50786	0.000302131
10.8453	103144								3.514	0.000260394
10.8513	102974								3.52014	0.000248718
10.8573	102799								3.52629	0.000247624
10.8633	102634								3.53243	0.000244699
10.8692	102491								3.53857	0.000251537
10.8752	102352								3.54472	0.000260382
10.8812	102207								3.55086	0.000274771
10.8872	102039								3.557	0.00028325
10.8931	101865								3.56315	0.000281326
10.8991	101703								3.56929	0.000279402
10.9051	101537								3.57544	0.000253018
10.911	101365								3.58158	0.000227132
10.917	101193								3.58772	0.000214144
10.923	101024								3.59387	0.000224588
10.929	100869								3.60001	0.000230879
10.9349	100703								3.60615	0.000248024
10.9409	100535								3.6123	0.000267569
10.9469	100376								3.61844	0.000285895
10.9529	100220								3.62458	0.000317065
10.9588	100031								3.63073	0.00031816
10.9648	99824.1								3.63687	0.000317816
10.9708	99632.9								3.64302	0.000317473
10.9768	99449.2								3.64916	0.000292628
10.9827	99260.6								3.6553	0.000275812
10.9887	99086.6								3.66145	0.000277293
10.9947	98927.7								3.66759	0.00028629
11.0006	98756.4								3.67373	0.000286854
11.0066	98579.5								3.67988	0.000288231
11.0126	98385.3								3.68602	0.000309446
11.0186	98181.2								3.69216	0.000342016
11.0245	97972								3.69831	0.000344874
11.0305	97760.5								3.70445	0.00034589
11.0365	97563.4								3.7106	0.000336238
11.0425	97390								3.71674	0.000326586
11.0484	97223.1								3.72288	0.000303734
11.0544	97041								3.72903	0.000311559
11.0604	96871.9								3.73517	0.000320982
11.0664	96699.8								3.74131	0.000326853
11.0723	96507.7								3.74746	0.00034129
11.0783	96318.4								3.7536	0.000356676
11.0843	96130.6								3.75974	0.00038357
11.0902	95955.3								3.76589	0.000404
11.0962	95805.3								3.77203	0.000407183
11.1022	95673.5								3.77818	0.000407483
11.1082	95510								3.78432	0.000407782
11.1141	95346.4								3.79046	0.000377032
11.1201	95153.3								3.79661	0.000375033
11.1261	95000.2								3.80275	0.000393561
11.1321	94818								3.80889	0.000412723
11.138	94668.3								3.81504	0.000436862
11.144	94492.7								3.82118	0.000447615
11.15	94305.6								3.82732	0.000476772
11.156	94099.9								3.83347	0.000511655
11.1619	93901.4								3.83961	0.000529677
11.1679	93676.6								3.84576	0.00053261
11.1739	93464.5								3.8519	0.000531004
11.1798	93307.3								3.85804	0.000529398
									3.86419	0.000518074
10.0748	132639								3.87033	0.000529143
10.0808	132323								3.87647	0.000548005
10.0867	131970								3.88262	0.000569004
10.0927	131641								3.88876	0.000583634
10.0987	131310								3.8949	0.000599044
10.1047	130986								3.90105	0.000623997
10.1106	130649								3.90719	0.000626678
10.1166	130271								3.91334	0.000624909
10.1226	129877								3.91948	0.000623139
10.1285	129492								3.92562	0.000596309
10.1345	129122								3.93177	0.000573011
10.1405	128762								3.93791	0.000559993
10.1465	128410								3.94405	0.000561622
10.1524	128074								3.9502	0.000564185
10.1584	127757								3.95634	0.000579947
10.1644	127438								3.96248	0.000599142
10.1704	127117								3.96863	0.000613591
10.1763	126790								3.97477	0.000649264
10.1823	126438								3.98092	0.000665035
10.1883	126078								3.98706	0.000672789
10.1943	125728								3.9932	0.000666667
10.2002	125416								3.99935	0.000660546
10.2062	125114								4.00549	0.000652685
10.2122	124814								4.01163	0.000675119
10.2181	124481								4.01778	0.000688745
10.2241	124160								4.02392	0.000701796
10.2301	123862								4.03006	0.000729569
10.2361	123598								4.03621	0.000754169
10.242	123330								4.04235	0.000785629
10.248	123036								4.0485	0.000799102
10.254	122743								4.05464	0.000803088
10.26	122450								4.06078	0.000792226
10.2659	122181								4.06693	0.000781365
10.2719	121889								4.07307	0.000760839
10.2779	121625								4.07921	0.000758482
10.2839	121345								4.08536	0.000769996
10.2898	121079								4.0915	0.000790273
10.2958	120816								4.09764	0.000810511
10.3018	120578								4.10379	0.000822509
10.3077	120345								4.10993	0.00084744
10.3137	120087								4.11608	0.000888058
10.3197	119811								4.12222	0.000893098
10.3257	119537								4.12836	0.000895763
10.3316	119278								4.13451	0.000889822
10.3376	119012								4.14065	0.000883881
10.3436	118767								4.14679	0.00086736
10.3496	118495								4.15294	0.000878701
10.3555	118194								4.15908	0.000899731
10.3615	117909								4.16522	0.000923014
10.3675	117670								4.17137	0.000927698
10.3735	117445								4.17751	0.000939464
10.3794	117225								4.18366	0.000978703
10.3854	117013								4.1898	0.000990504
10.3914	116787								4.19594	0.00099616
10.3973	116549								4.20209	0.000993866
10.4033	116329								4.20823	0.000991572
10.4093	116130								4.21437	0.000978548
10.4153	115926								4.22052	0.000974563
10.4212	115707								4.22666	0.00100457
10.4272	115449								4.2328	0.00103158
10.4332	115324								4.23895	0.00103502
									4.24509	0.00105164
									4.25124	0.00108035
8.94583	267180								4.25738	0.00111133
8.95181	266072								4.26352	0.00111729
8.95778	264805								4.26967	0.00111907
8.96375	263399								4.27581	0.0011055
8.96973	262286								4.28195	0.00109193
8.9757	261587								4.2881	0.00109012
8.98167	261058								4.29424	0.00111931
8.98765	259918								4.30038	0.00112533
8.99362	258837								4.30653	0.00113024
8.99959	257501								4.31267	0.00114406
9.00557	256533								4.31882	0.00116365
9.01154	255505								4.32496	0.00119182
9.01751	254570								4.3311	0.001196
9.02349	253382								4.33725	0.00119626
9.02946	252342								4.34339	0.00119652
9.03543	251333								4.34953	0.00116425
9.04141	250441								4.35568	0.00114781
9.04738	249477								4.36182	0.00115893
9.05335	248562								4.36796	0.00116542
9.05933	247673								4.37411	0.00117485
9.0653	246605								4.38025	0.0011905
9.07127	245607								4.3864	0.00120037
9.07725	244710								4.39254	0.00122438
9.08322	243878								4.39868	0.00124047
9.08919	242805								4.40483	0.00123137
9.09517	241344								4.41097	0.00122227
9.10114	239975								4.41711	0.00120142
9.10711	238956								4.42326	0.00115725
9.11309	238135								4.4294	0.00114971
9.11906	237285								4.43554	0.00114864
9.12503	236475								4.44169	0.00114756
9.13101	235595								4.44783	0.00113818
9.13698	234609								4.45398	0.001147
9.14295	233667								4.46012	0.00116389
9.14892	232810								4.46626	0.00118058
9.1549	232003								4.47241	0.00117889
9.16087	231162								4.47855	0.0011772
9.16684	230371								4.48469	0.00116732
9.17282	229592								4.49084	0.00113285
9.17879	228851								4.49698	0.00112342
9.18476	228015								4.50312	0.00112443
9.19074	227234								4.50927	0.00112545
9.19671	226372								4.51541	0.00113131
9.20268	225544								4.52156	0.00113325
9.20866	224728								4.5277	0.00113519
9.21463	223884								4.53384	0.00116184
9.2206	223103								4.53999	0.00117281
9.22658	222308								4.54613	0.0011746
9.23255	221514								4.55227	0.00115786
9.23852	220752								4.55842	0.00114112
9.2445	220026								4.56456	0.00112096
9.25047	219333								4.5707	0.00111285
9.25644	218605								4.57685	0.00110175
9.26242	217882								4.58299	0.00110653
9.26839	217210								4.58914	0.00110748
9.27436	216423								4.59528	0.00110843
9.28034	215551								4.60142	0.00111031
9.28631	214709								4.60757	0.001121
9.29228	213939								4.61371	0.0011253
9.29826	213191								4.61985	0.00111525
9.30423	212452								4.626	0.00110521
9.3102	211721								4.63214	0.00107005
9.31618	211000								4.63828	0.00104516
9.32215	210280								4.64443	0.0010332
9.32812	209495								4.65057	0.00102279
9.3341	208671								4.65672	0.00101227
9.34007	207570								4.66286	0.00100486
									4.669	0.00100638
									4.67515	0.00100704
									4.68129	0.00100334
									4.68743	0.000999631
									4.69358	0.000955713
									4.69972	0.000918858
									4.70586	0.000890958
									4.71201	0.000874479
									4.71815	0.000872052
									4.7243	0.000869624
									4.73044	0.000851885
									4.73658	0.000839729
									4.74273	0.000859349
									4.74887	0.000860005
									4.75501	0.000858148
									4.76116	0.000856292
									4.7673	0.00084159
									4.77344	0.000807849
									4.77959	0.000778815
									4.78573	0.000776049
									4.79188	0.000774233
									4.79802	0.000772417
									4.80416	0.000766537
									4.81031	0.000770071
									4.81645	0.000767379
									4.82259	0.000764687
									4.82874	0.000756677
									4.83488	0.000732628
									4.84102	0.000684139
									4.84717	0.000648008
									4.85331	0.000640969
									4.85946	0.000641209
									4.8656	0.000634863
									4.87174	0.000610543
									4.87789	0.000600129
									4.88403	0.000610149
									4.89017	0.000608092
									4.89632	0.000606036
									4.90246	0.000598903
									4.9086	0.000565522
									4.91475	0.00053147
									4.92089	0.000520293
									4.92704	0.000518842
									4.93318	0.000518658
									4.93932	0.000518473
									4.94547	0.000514758
									4.95161	0.000528703
									4.95775	0.00053202
									4.9639	0.000531654
									4.97004	0.000531288
									4.97618	0.00049825
									4.98233	0.000457949
									4.98847	0.00043691
									4.99462	0.000416677
									5.00076	0.000402525
									5.0069	0.000394242
									5.01305	0.000390402
									5.01919	0.00040066
									5.02533	0.000402049
									5.03148	0.000398529
									5.03762	0.000395008
									5.04376	0.000374697
									5.04991	0.00032601
									5.05605	0.00027671
									5.0622	0.000273746
									5.06834	0.00027003
									5.07448	0.000260217
									5.08063	0.000259208
									5.08677	0.000252218
									5.09291	0.000261517
									5.09906	0.000264185
									5.1052	0.000263265
									5.11134	0.000262345
									5.11749	0.0002382
									5.12363	0.000203269
									5.12978	0.000185905
									5.13592	0.000192022
									5.14206	0.000195739
									5.14821	0.000206296
									5.15435	0.000217516
									5.16049	0.000221637
									5.16664	0.000237377
									5.17278	0.000243591
									5.17892	0.000235317
									5.18507	0.000227043
									5.19121	0.000199681
									5.19736	0.000169125
									5.2035	0.000154143
									5.20964	0.000162636
									5.21579	0.000165798
									5.22193	0.000167107
									5.22807	0.000168415
									5.23422	0.000194005
									5.24036	0.000197756
									5.2465	0.00019892
									5.25265	0.000191991
									5.25879	0.000185061
									5.26494	0.000162963
									5.27108	0.000152677
									5.27722	0.000163673
									5.28337	0.000170875
									5.28951	0.000178076
									5.29565	0.000183324
									5.3018	0.000212352
									5.30794	0.000247257
									5.31408	0.000249516
									5.32023	0.000249693
									5.32637	0.000249871
									5.33252	0.000231295
									5.33866	0.00021954
									5.3448	0.000225432
									5.35095	0.000247806
									5.35709	0.000251005
									5.36323	0.000254204
									5.36938	0.000271535
									5.37552	0.000312015
									5.38166	0.000310591
									5.38781	0.000309168
									5.39395	0.000304095
									5.4001	0.000279698
									5.40624	0.000246507
									5.41238	0.000245093
									5.41853	0.000261395
									5.42467	0.00026278
									5.43081	0.000262899
									5.43696	0.000263018
									5.4431	0.000288022
									5.44924	0.000314395
									5.45539	0.000328581
									5.46153	0.000325181
									5.46768	0.000321782
									5.47382	0.000311943
									5.47996	0.000306748
									5.48611	0.000322849
									5.49225	0.000341249
									5.49839	0.000371095
									5.50454	0.000407261
									5.51068	0.000435739
									5.51682	0.000482412
									5.52297	0.000516153
									5.52911	0.000520235
									5.53526	0.000521727
									5.5414	0.000513095
									5.54754	0.000504462
									5.55369	0.00050565
									5.55983	0.00051385
									5.56597	0.000521432
									5.57212	0.000537853
									5.57826	0.000548948
									5.58441	0.000563002
									5.59055	0.00057029
									5.59669	0.000573006
									5.60284	0.000557489
									5.60898	0.000541972
									5.61512	0.000516193
									5.62127	0.000508429
									5.62741	0.00050244
									5.63355	0.000501728
									5.6397	0.000510892
									5.64584	0.000512766
									5.65199	0.000523041
									5.65813	0.000546887
									5.66427	0.000544591
									5.67042	0.000542294
									5.67656	0.000534504
									5.6827	0.000511793
									5.68885	0.000483228
									5.69499	0.000468578
									5.70113	0.000470486
									5.70728	0.000469802
									5.71342	0.000469119
									5.71957	0.000461082
									5.72571	0.000476082
									5.73185	0.000479134
									5.738	0.000477293
									5.74414	0.000475453
									5.75028	0.000448876
									5.75643	0.000429324
									5.76257	0.000417994
									5.76871	0.000410475
									5.77486	0.00041722
									5.781	0.000429104
									5.78715	0.000434652
									5.79329	0.000447231
									5.79943	0.000458134
									5.80558	0.000460059
									5.81172	0.000452702
									5.81786	0.000445345
									5.82401	0.000426784
									5.83015	0.000399426
									5.83629	0.000388669
									5.84244	0.000401221
									5.84858	0.000412393
									5.85473	0.000416643
									5.86087	0.000428234
									5.86701	0.000435236
									5.87316	0.00043826
									5.8793	0.000427927
									5.88544	0.000417594
									5.89159	0.000377417
									5.89773	0.000330703
									5.90387	0.000314204
									5.91002	0.00031176
									5.91616	0.000309315
									5.92231	0.000292411
									5.92845	0.00026792
									5.93459	0.000267061
									5.94074	0.000266202
									5.94688	0.000259734
									5.95302	0.000242313
									5.95917	0.000213376
									5.96531	0.000155738
									5.97145	0.000116158
									5.9776	0.000107692
									5.98374	0.000107417
									5.98989	0.000103598
									5.99603	9.06284e-05
									6.00217	9.39861e-05
									6.00832	0.000100073
									6.01446	0.000101577
									6.0206	8.87444e-05
									6.02675	7.59121e-05
									6.03289	4.10743e-05
									6.03903	1.08716e-05
									6.04518	4.98068e-06
									6.05132	6.52752e-06
									6.05747	7.13232e-06
									6.06361	7.73711e-06
									6.06975	1.8476e-05
									6.0759	3.21857e-05
									6.08204	3.26787e-05
									6.08818	3.08406e-05
									6.09433	2.90025e-05
									6.10047	-5.10364e-06
									6.10661	-4.18532e-05
									6.11276	-5.87029e-05
									6.1189	-7.2401e-05
									6.12505	-9.41825e-05
									6.13119	-0.000113801
									6.13733	-0.000120501
									6.14348	-0.000117934
									6.14962	-0.000119019
									6.15576	-0.000120104
									6.16191	-0.000133334
									6.16805	-0.00016493
									6.17419	-0.00022264
									6.18034	-0.000255967
									6.18648	-0.000266595
									6.19263	-0.000285175
									6.19877	-0.000290343
									6.20491	-0.000295494
									6.21106	-0.000293308
									6.2172	-0.000293422
									6.22334	-0.000293536
									6.22949	-0.00029928
									6.23563	-0.000321736
									6.24177	-0.00036215
									6.24792	-0.000384936
									6.25406	-0.000395885
									6.26021	-0.000410451
									6.26635	-0.000409314
									6.27249	-0.000410429
									6.27864	-0.000411544
									6.28478	-0.000386426
									6.29092	-0.000369346
									6.29707	-0.000361787
									6.30321	-0.000367474
									6.30935	-0.000373161
									6.3155	-0.000395048
									6.32164	-0.000404293
									6.32779	-0.000398373
									6.33393	-0.000386513
									6.34007	-0.000379581
									6.34622	-0.000360175
									6.35236	-0.000338068
									6.3585	-0.000321347
									6.36465	-0.000313112
									6.37079	-0.000310796
									6.37693	-0.00031144
									6.38308	-0.000312085
									6.38922	-0.000336818
									6.39537	-0.000334108
									6.40151	-0.000327459
									6.40765	-0.000326781
									6.4138	-0.00032818
									6.41994	-0.000329579
									6.42608	-0.000302668
									6.43223	-0.000288661
									6.43837	-0.000285345
									6.44451	-0.000297257
									6.45066	-0.000309168
									6.4568	-0.000346271
									6.46295	-0.000370903
									6.46909	-0.000372817
									6.47523	-0.000377289
									6.48138	-0.000378353
									6.48752	-0.000375175
									6.49366	-0.000368351
									6.49981	-0.000356163
									6.50595	-0.000350055
									6.51209	-0.000355639
									6.51824	-0.000361222
									6.52438	-0.000389072
									6.53053	-0.000415166
									6.53667	-0.000401875
									6.54281	-0.000397454
									6.54896	-0.000396264
									6.5551	-0.000395074
									6.56124	-0.00036932
									6.56739	-0.000336852
									6.57353	-0.000331184
									6.57967	-0.000328882
									6.58582	-0.000338862
									6.59196	-0.000348841
									6.59811	-0.000383754
									6.60425	-0.000385826
									6.61039	-0.000380867
									6.61654	-0.000379491
									6.62268	-0.000373863
									6.62882	-0.000358072
									6.63497	-0.000335265
									6.64111	-0.000319885
									6.64725	-0.000319651
									6.6534	-0.000319416
									6.65954	-0.000328983
									6.66569	-0.00036044
									6.67183	-0.000369639
									6.67797	-0.000358811
									6.68412	-0.000346892
									6.69026	-0.000328886
									6.6964	-0.000322927
									6.70255	-0.000303519
									6.70869	-0.000273533
									6.71483	-0.000258132
									6.72098	-0.000258947
									6.72712	-0.000259762
									6.73327	-0.000264168
									6.73941	-0.000284667
									6.74555	-0.000291794
									6.7517	-0.000287613
									6.75784	-0.000270871
									6.76398	-0.000254695
									6.77013	-0.000251602
									6.77627	-0.000233809
									6.78241	-0.00021793
									6.78856	-0.000209871
									6.7947	-0.000215308
									6.80085	-0.000220746
									6.80699	-0.000242533
									6.81313	-0.000243847
									6.81928	-0.000240479
									6.82542	-0.000237112
									6.83156	-0.000220432
									6.83771	-0.000212813
									6.84385	-0.000203391
									6.84999	-0.000192412
									6.85614	-0.000187335
									6.86228	-0.000193891
									6.86843	-0.000200446
									6.87457	-0.000242196
									6.88071	-0.000272348
									6.88686	-0.000284783
									6.893	-0.000281109
									6.89914	-0.000275509
									6.90529	-0.000274527
									6.91143	-0.000273546
									6.91757	-0.000256023
									6.92372	-0.000252766
									6.92986	-0.000253926
									6.93601	-0.000255087
									6.94215	-0.000273726
									6.94829	-0.000292165
									6.95444	-0.000308085
									6.96058	-0.00028945
									6.96672	-0.000271042
									6.97287	-0.000264029
									6.97901	-0.000262072
									6.98515	-0.00024031
									6.9913	-0.000205513
									6.99744	-0.00020731
									7.00359	-0.000209106
									7.00973	-0.000214028
									7.01587	-0.000237121
									7.02202	-0.000254221
									7.02816	-0.000250324
									7.0343	-0.000248827
									7.04045	-0.000252491
									7.04659	-0.000256156
									7.05273	-0.000241268
									7.05888	-0.000229476
									7.06502	-0.000225234
									7.07117	-0.000227364
									7.07731	-0.000229494
									7.08345	-0.000254289
									7.0896	-0.000282687
									7.09574	-0.000278129
									7.10188	-0.000263155
									7.10803	-0.000261676
									7.11417	-0.000260196
									7.12031	-0.000246857
									7.12646	-0.00021861
									7.1326	-0.000193164
									7.13875	-0.000197156
									7.14489	-0.000201147
									7.15103	-0.000211577
									7.15718	-0.000253634
									7.16332	-0.000273825
									7.16946	-0.000267739
									7.17561	-0.000264477
									7.18175	-0.000261216
									7.18789	-0.000259514
									7.19404	-0.000245697
									7.20018	-0.000244159
									7.20633	-0.000243658
									7.21247	-0.00025074
									7.21861	-0.000257821
									7.22476	-0.000291861
									7.2309	-0.000309243
									7.23704	-0.000310346
									7.24319	-0.000311449
									7.24933	-0.000304896
									7.25547	-0.00030171
									7.26162	-0.000297792
									7.26776	-0.000286268
									7.27391	-0.000281174
									7.28005	-0.00028494
									7.28619	-0.000288706
									7.29234	-0.00032907
									7.29848	-0.000362554
									7.30462	-0.00036276
									7.31077	-0.000363509
									7.31691	-0.000364257
									7.32305	-0.000363834
									7.3292	-0.000363412
									7.33534	-0.000355999
									7.34149	-0.000321521
									7.34763	-0.000324561
									7.35377	-0.000327601
									7.35992	-0.000336919
									7.36606	-0.000366166
									7.3722	-0.000390923
									7.37835	-0.00039461
									7.38449	-0.000394769
									7.39063	-0.000394636
									7.39678	-0.000394504
									7.40292	-0.000395135
									7.40907	-0.000373233
									7.41521	-0.000376831
									7.42135	-0.00038043
									7.4275	-0.000390377
									7.43364	-0.000423166
									7.43978	-0.000456479
									7.44593	-0.000467579
									7.45207	-0.000476165
									7.45821	-0.000463949
									7.46436	-0.000463323
									7.4705	-0.000462696
									7.47665	-0.000445484
									7.48279	-0.000433056
									7.48893	-0.000429275
									7.49508	-0.000437585
									7.50122	-0.000445895
									7.50736	-0.000480392
									7.51351	-0.000501978
									7.51965	-0.000500327
									7.52579	-0.000491057
									7.53194	-0.000486813
									7.53808	-0.000482569
									7.54423	-0.00047064
									7.55037	-0.000429538
									7.55651	-0.000427235
									7.56266	-0.000426515
									7.5688	-0.000434773
									7.57494	-0.000443032
									7.58109	-0.000465055
									7.58723	-0.000467039
									7.59337	-0.000448136
									7.59952	-0.000441554
									7.60566	-0.000434972
									7.61181	-0.000428809
									7.61795	-0.000402591
									7.62409	-0.000397573
									7.63024	-0.000395684
									7.63638	-0.000405182
									7.64252	-0.00041468
									7.64867	-0.000449627
									7.65481	-0.000472177
									7.66096	-0.00046805
									7.6671	-0.000467294
									7.67324	-0.000467938
									7.67939	-0.000468581
									7.68553	-0.000465982
									7.69167	-0.000457452
									7.69782	-0.000454875
									7.70396	-0.000454667
									7.7101	-0.000454458
									7.71625	-0.000475472
									7.72239	-0.000496919
									7.72854	-0.000494891
									7.73468	-0.000492862
									7.74082	-0.000475915
									7.74697	-0.000463985
									7.75311	-0.000460334
									7.75925	-0.000430075
									7.7654	-0.000419682
									7.77154	-0.000415764
									7.77768	-0.00042236
									7.78383	-0.000428956
									7.78997	-0.000449528
									7.79612	-0.000452008
									7.80226	-0.000448473
									7.8084	-0.000437545
									7.81455	-0.000423927
									7.82069	-0.000405655
									7.82683	-0.000381982
									7.83298	-0.000353413
									7.83912	-0.000349229
									7.84526	-0.000348947
									7.85141	-0.000348665
									7.85755	-0.000380643
									7.8637	-0.000393386
									7.86984	-0.000387253
									7.87598	-0.000374178
									7.88213	-0.000349083
									7.88827	-0.000342922
									7.89441	-0.000336762
									7.90056	-0.000307598
									7.9067	-0.000264563
									7.91284	-0.00026285
									7.91899	-0.000262345
									7.92513	-0.000262189
									7.93128	-0.000262032
									7.93742	-0.000247135
									7.94356	-0.000221828
									7.94971	-0.000177172
									7.95585	-0.000139813
									7.96199	-0.000105083
									7.96814	-6.25349e-05
									7.97428	-2.10606e-06
									7.98042	3.9359e-05
									7.98657	4.90944e-05
									7.99271	6.58652e-05
									7.99886	7.35432e-05
									8.005	7.86467e-05
									8.01114	0.00010323
									8.01729	0.000147791
									8.02343	0.000191137
									8.02957	0.000233625
									8.03572	0.000273743
									8.04186	0.000337258
									8.048	0.000387232
									8.05415	0.000424531
									8.06029	0.000454571
									8.06644	0.000477227
									8.07258	0.000498269
									8.07872	0.000548189
									8.08487	0.000613001
									8.09101	0.000672718
									8.09715	0.000734167
									8.1033	0.000805535
									8.10944	0.000918382
									8.11558	0.00101714
									8.12173	0.00108315
									8.12787	0.00116501
									8.13402	0.00123989
									8.14016	0.00128178
									8.1463	0.00136323
									8.15245	0.00147496
									8.15859	0.00158475
									8.16473	0.0016796
									8.17088	0.00178835
									8.17702	0.00191624
									8.18316	0.00207159
									8.18931	0.00221225
									8.19545	0.00233511
									8.2016	0.002454
									8.20774	0.00254622
									8.21388	0.00265744
									8.22003	0.00280181
									8.22617	0.00297784
									8.23231	0.0031299
									8.23846	0.00329563
									8.2446	0.00346445
									8.25074	0.00366356
									8.25689	0.00385904
									8.26303	0.00405959
									8.26918	0.0042271
									8.27532	0.00438245
									8.28146	0.00452996
									8.28761	0.00473464
									8.29375	0.00495595
									8.29989	0.00517702
									8.30604	0.00542961
									8.31218	0.00566822
									8.31832	0.00590822
									8.32447	0.00616957
									8.33061	0.00644919
									8.33676	0.00668597
									8.3429	0.00693101
									8.34904	0.00714431
									8.35519	0.00739688
									8.36133	0.0076792
									8.36747	0.00799067
									8.37362	0.00828927
									8.37976	0.00860218
									8.3859	0.00892042
									8.39205	0.009271
									8.39819	0.00966475
									8.40434	0.0100148
									8.41048	0.0103585
									8.41662	0.0106517
									8.42277	0.0110046
									8.42891	0.0113715
									8.43505	0.0117858
									8.4412	0.0121787
									8.44734	0.0126308
									8.45348	0.0130633
									8.45963	0.0135764
									8.46577	0.0140846
									8.47192	0.0146055
									8.47806	0.015079
									8.4842	0.0155711
									8.49035	0.0160386
									8.49649	0.0165303
									8.50263	0.0171313
									8.50878	0.0177506
									8.51492	0.018373
									8.52106	0.0189992
									8.52721	0.0197128
									8.53335	0.020446
									8.5395	0.021257
									8.54564	0.0220015
									8.55178	0.0227821
									8.55793	0.0235032
									8.56407	0.0243069
									8.57021	0.0251584
									8.57636	0.0261276
									8.5825	0.0270837
									8.58864	0.0280597
									8.59479	0.0291412
									8.60093	0.0302425
									8.60708	0.0315147
									8.61322	0.0326561
									8.61936	0.0339161
									8.62551	0.0350666
									8.63165	0.0363099
									8.63779	0.0375589
									8.64394	0.0390444
									8.65008	0.0404996
									8.65622	0.0420998
									8.66237	0.0435938
									8.66851	0.0453154
									8.67466	0.0470908
									8.6808	0.0489514
									8.68694	0.0506993
									8.69309	0.0524414
									8.69923	0.0543216
									8.70537	0.0562139
									8.71152	0.0581779
									8.71766	0.0602107
									8.7238	0.0624677
									8.72995	0.06457
									8.73609	0.0668906
									8.74224	0.0692953
									8.74838	0.0719158
									8.75452	0.0742477
									8.76067	0.0765653
									8.76681	0.0790822
									8.77295	0.0816503
									8.7791	0.0843459
									8.78524	0.0870122
									8.79138	0.0900139
									8.79753	0.0929014
									8.80367	0.0958712
									8.80982	0.0986346
									8.81596	0.101797
									8.8221	0.1048
									8.82825	0.108022
									8.83439	0.111166
									8.84053	0.114227
									8.84668	0.117
									8.85282	0.120145
									8.85896	0.123182
									8.86511	0.126352
									8.87125	0.12934
									8.8774	0.132503
									8.88354	0.135631
									8.88968	0.138847
									8.89583	0.142128
									8.90197	0.145217
									8.90811	0.147998
									8.91426	0.150779
									8.9204	0.153913
									8.92654	0.15693
									8.93269	0.160067
									8.93883	0.163038
									8.94498	0.166082
									8.95112	0.169079
									8.95726	0.17209
									8.96341	0.175177
									8.96955	0.178051
									8.97569	0.180684
									8.98184	0.183125
									8.98798	0.185873
									8.99412	0.188494
									9.00027	0.191273
									9.00641	0.193757
									9.01256	0.196294
									9.0187	0.198675
									9.02484	0.201342
									9.03099	0.203709
									9.03713	0.206025
									9.04327	0.208193
									9.04942	0.21044
									9.05556	0.212446
									9.0617	0.214394
									9.06785	0.216499
									9.07399	0.218318
									9.08014	0.220175
									9.08628	0.221791
									9.09242	0.223944
									9.09857	0.226128
									9.10471	0.227908
									9.11085	0.229234
									9.117	0.230529
									9.12314	0.231643
									9.12928	0.232741
									9.13543	0.233961
									9.14157	0.235065
									9.14772	0.235997
									9.15386	0.236785
									9.16	0.237614
									9.16615	0.238375
									9.17229	0.239072
									9.17843	0.239586
									9.18458	0.24007
									9.19072	0.240414
									9.19686	0.24075
									9.20301	0.241045
									9.20915	0.24127
									9.2153	0.241407
									9.22144	0.241402
									9.22758	0.241397
									9.23373	0.241375
									9.23987	0.241235
									9.24601	0.241002
									9.25216	0.240729
									9.2583	0.240412
									9.26444	0.240023
									9.27059	0.239602
									9.27673	0.239166
									9.28288	0.238675
									9.28902	0.238065
									9.29516	0.237479
									9.30131	0.236812
									9.30745	0.236101
									9.31359	0.235315
									9.31974	0.234566
									9.32588	0.233805
									9.33202	0.232965
									9.33817	0.232136
									9.34431	0.231294
									9.35046	0.230425
									9.3566	0.229439
									9.36274	0.228516
									9.36889	0.227494
									9.37503	0.226492
									9.38117	0.224897
									9.38732	0.223336
									9.39346	0.222136
									9.3996	0.221168
									9.40575	0.220135
									9.41189	0.219145
									9.41804	0.218057
									9.42418	0.217039
									9.43032	0.215957
									9.43647	0.214958
									9.44261	0.21387
									9.44875	0.212794
									9.4549	0.211787
									9.46104	0.210684
									9.46718	0.209471
									9.47333	0.208422
									9.47947	0.207543
									9.48562	0.20655
									9.49176	0.205646
									9.4979	0.204707
									9.50405	0.203849
									9.51019	0.202947
									9.51633	0.202088
									9.52248	0.201273
									9.52862	0.200424
									9.53476	0.199611
									9.54091	0.198921
									9.54705	0.198292
									9.5532	0.197593
									9.55934	0.196949
									9.56548	0.196289
									9.57163	0.19572
									9.57777	0.195137
									9.58391	0.194612
									9.59006	0.194068
									9.5962	0.193602
									9.60234	0.193132
									9.60849	0.192729
									9.61463	0.192359
									9.62078	0.192056
									9.62692	0.191743
									9.63306	0.191479
									9.63921	0.191236
									9.64535	0.191049
									9.65149	0.190902
									9.65764	0.190742
									9.66378	0.190617
									9.66992	0.190532
									9.67607	0.190477
									9.68221	0.190455
									9.68836	0.190476
									9.6945	0.190519
									9.70064	0.190602
									9.70679	0.190742
									9.71293	0.190873
									9.71907	0.191029
									9.72522	0.191243
									9.73136	0.191475
									9.73751	0.191706
									9.74365	0.191945
									9.74979	0.192226
									9.75594	0.19251
									9.76208	0.192869
									9.76822	0.193234
									9.77437	0.193661
									9.78051	0.194066
									9.78665	0.194526
									9.7928	0.194991
									9.79894	0.195517
									9.80509	0.196
									9.81123	0.196509
									9.81737	0.19699
									9.82352	0.197507
									9.82966	0.198035
									9.8358	0.19865
									9.84195	0.199258
									9.84809	0.199852
									9.85423	0.200491
									9.86038	0.201156
									9.86652	0.201836
									9.87267	0.202486
									9.87881	0.203153
									9.88495	0.203757
									9.8911	0.204391
									9.89724	0.20501
									9.90338	0.205734
									9.90953	0.206424
									9.91567	0.207104
									9.92181	0.20786
									9.92796	0.208609
									9.9341	0.209466
									9.94025	0.210398
									9.94639	0.211247
									9.95253	0.211932
									9.95868	0.212639
									9.96482	0.213288
									9.97096	0.21405
									9.97711	0.214787
									9.98325	0.215585
									9.98939	0.216308
									9.99554	0.217071
									10.0017	0.217816
									10.0078	0.218642
									10.014	0.219369
									10.0201	0.220112
									10.0263	0.22081
									10.0324	0.221512
									10.0385	0.222197
									10.0447	0.222935
									10.0508	0.224094
									10.057	0.225259
									10.0631	0.226285
									10.0693	0.22712
									10.0754	0.227937
									10.0815	0.228675
									10.0877	0.229424
									10.0938	0.230123
									10.1	0.230825
									10.1061	0.231496
									10.1123	0.232206
									10.1184	0.233005
									10.1246	0.23379
									10.1307	0.23453
									10.1368	0.235234
									10.143	0.23603
									10.1491	0.236788
									10.1553	0.237561
									10.1614	0.238236
									10.1676	0.238955
									10.1737	0.239601
									10.1798	0.240332
									10.186	0.241041
									10.1921	0.241804
									10.1983	0.242512
									10.2044	0.243247
									10.2106	0.24395
									10.2167	0.24475
									10.2229	0.245502
									10.229	0.246232
									10.2351	0.246887
									10.2413	0.247539
									10.2474	0.248255
									10.2536	0.248967
									10.2597	0.249726
									10.2659	0.250449
									10.272	0.25122
									10.2781	0.251934
									10.2843	0.252738
									10.2904	0.253526
									10.2966	0.254288
									10.3027	0.254977
									10.3089	0.255659
									10.315	0.256399
									10.3212	0.257159
									10.3273	0.257933
									10.3334	0.258691
									10.3396	0.2595
									10.3457	0.260255
									10.3519	0.261243
									10.358	0.262274
									10.3642	0.263215
									10.3703	0.263993
									10.3764	0.264797
									10.3826	0.265532
									10.3887	0.266335
									10.3949	0.267168
									10.401	0.268066
									10.4072	0.268918
									10.4133	0.26981
									10.4194	0.270666
									10.4256	0.271622
									10.4317	0.272528
									10.4379	0.273397
									10.444	0.274312
									10.4502	0.275124
									10.4563	0.275978
									10.4625	0.276871
									10.4686	0.277853
									10.4747	0.278782
									10.4809	0.279703
									10.487	0.280699
									10.4932	0.281724
									10.4993	0.282742
									10.5055	0.283707
									10.5116	0.284718
									10.5177	0.285696
									10.5239	0.286581
									10.53	0.287488
									10.5362	0.28856
									10.5423	0.289586
									10.5485	0.290658
									10.5546	0.291633
									10.5608	0.292682
									10.5669	0.293741
									10.573	0.294845
									10.5792	0.295828
									10.5853	0.296779
									10.5915	0.297777
									10.5976	0.298756
									10.6038	0.299766
									10.6099	0.300797
									10.616	0.301902
									10.6222	0.302907
									10.6283	0.303979
									10.6345	0.305023
									10.6406	0.306161
									10.6468	0.307156
									10.6529	0.30818
									10.6591	0.309122
									10.6652	0.310069
									10.6713	0.311005
									10.6775	0.311979
									10.6836	0.31303
									10.6898	0.314036
									10.6959	0.314963
									10.7021	0.315872
									10.7082	0.316913
									10.7143	0.317838
									10.7205	0.318758
									10.7266	0.319584
									10.7328	0.32043
									10.7389	0.321195
									10.7451	0.322087
									10.7512	0.322911
									10.7573	0.323778
									10.7635	0.324562
									10.7696	0.325369
									10.7758	0.326142
									10.7819	0.326907
									10.7881	0.327647
									10.7942	0.328317
									10.8004	0.328936
									10.8065	0.329511
									10.8126	0.330152
									10.8188	0.330751
									10.8249	0.331356
									10.8311	0.331887
									10.8372	0.332387
									10.8434	0.332856
									10.8495	0.333357
									10.8556	0.333768
									10.8618	0.33413
									10.8679	0.334443
									10.8741	0.334709
									10.8802	0.334973
									10.8864	0.335245
									10.8925	0.33548
									10.8987	0.33566
									10.9048	0.335802
									10.9109	0.335901
									10.9171	0.335939
									10.9232	0.335956
									10.9294	0.335939
									10.9355	0.335922
									10.9417	0.335823
									10.9478	0.335706
									10.9539	0.335573
									10.9601	0.335419
									10.9662	0.335213
									10.9724	0.334961
									10.9785	0.334678
									10.9847	0.334335
									10.9908	0.333936
									10.997	0.333518
									11.0031	0.333079
									11.0092	0.33257
									11.0154	0.332075
									11.0215	0.331519
									11.0277	0.330971
									11.0338	0.330333
									11.04	0.329669
									11.0461	0.328925
									11.0522	0.328184
									11.0584	0.327329
									11.0645	0.326471
									11.0707	0.325613
									11.0768	0.324667
									11.083	0.323731
									11.0891	0.322824
									11.0952	0.321898
									11.1014	0.320836
									11.1075	0.319805
									11.1137	0.318636
									11.1198	0.317548
									11.126	0.316294
									11.1321	0.315082
									11.1383	0.313761
									11.1444	0.312549
									11.1505	0.311243
									11.1567	0.310022
									11.1628	0.308703
									11.169	0.30739
									11.1751	0.306048
									11.1813	0.304544
									11.1874	0.303058
									11.1935	0.301601
									11.1997	0.300084
									11.2058	0.298415
									11.212	0.296907
									11.2181	0.295292
									11.2243	0.293798
									11.2304	0.292202
									11.2366	0.290634
									11.2427	0.288915
									11.2488	0.287279
									11.255	0.285522
									11.2611	0.283831
									11.2673	0.282097
									11.2734	0.280157
									11.2796	0.278312
									11.2857	0.276575
									11.2918	0.274885
									11.298	0.27311
									11.3041	0.271422
									11.3103	0.269471
									11.3164	0.267691
									11.3226	0.265732
									11.3287	0.263933
									11.3349	0.261746
									11.341	0.259597
									11.3471	0.257511
									11.3533	0.255617
									11.3594	0.253659
									11.3656	0.251885
									11.3717	0.250136
									11.3779	0.248122
									11.384	0.246133
									11.3901	0.244228
									11.3963	0.242338
									11.4024	0.240266
									11.4086	0.238288
									11.4147	0.236157
									11.4209	0.234201
									11.427	0.232158
									11.4331	0.230314
									11.4393	0.228406
									11.4454	0.226387
									11.4516	0.223757
									11.4577	0.221385
									11.4639	0.219474
									11.47	0.217407
									11.4762	0.215331
									11.4823	0.213295
									11.4884	0.211268
									11.4946	0.209018
									11.5007	0.207052
									11.5069	0.20513
									11.513	0.20334
									11.5192	0.201307
									11.5253	0.199439
									11.5314	0.197413
									11.5376	0.195573
									11.5437	0.193595
									11.5499	0.191619
									11.556	0.189569
									11.5622	0.187691
									11.5683	0.185877
									11.5745	0.183987
									11.5806	0.182169
									11.5867	0.180366
									11.5929	0.178557
									11.599	0.176598
									11.6052	0.174821
									11.6113	0.172943
									11.6175	0.171103
									11.6236	0.169113
									11.6297	0.167356
									11.6359	0.16552
									11.642	0.163793
									11.6482	0.162055
									11.6543	0.160396
									11.6605	0.158707
									11.6666	0.156867
									11.6728	0.1551
									11.6789	0.153451
									11.685	0.151794
									11.6912	0.149929
									11.6973	0.14827
									11.7035	0.146531
									11.7096	0.144952
									11.7158	0.143317
									11.7219	0.141842
									11.728	0.14018
									11.7342	0.138632
									11.7403	0.136987
									11.7465	0.135457
									11.7526	0.133865
									11.7588	0.132294
									11.7649	0.130751
									11.771	0.129134
									11.7772	0.127588
									11.7833	0.126175
									11.7895	0.124847
									11.7956	0.123362
									11.8018	0.121966
									11.8079	0.120481
									11.8141	0.119073
									11.8202	0.117618
									11.8263	0.116244
									11.8325	0.114721
									11.8386	0.113327
									11.8448	0.111817
									11.8509	0.110293
									11.8571	0.108957
									11.8632	0.107583
									11.8693	0.106104
									11.8755	0.104559
									11.8816	0.103323
									11.8878	0.102007
									11.8939	0.100769
									11.9001	0.0994066
									11.9062	0.0981527
									11.9124	0.0968617
									11.9185	0.0956808
									11.9246	0.0944995
									11.9308	0.0934141
									11.9369	0.0921684
									11.9431	0.0907895
									11.9492	0.0894317
									11.9554	0.0883668
									11.9615	0.0873039
									11.9676	0.0861534
									11.9738	0.0849511
									11.9799	0.0836864
									11.9861	0.0824817
									11.9922	0.0814206
									11.9984	0.0804737
									12.0045	0.0794745
									12.0107	0.0785091
									12.0168	0.0775082
									12.0229	0.0765508
									12.0291	0.0755661
									12.0352	0.0746452
									12.0414	0.0736415
									12.0475	0.0727086
									12.0537	0.0718363
									12.0598	0.0708933
									12.0659	0.0700713
									12.0721	0.0692094
									12.0782	0.0684106
									12.0844	0.0675442
									12.0905	0.0667207
									12.0967	0.0658808
									12.1028	0.0651433
									12.1089	0.0643238
									12.1151	0.0635227
									12.1212	0.0627193
									12.1274	0.0619857
									12.1335	0.0612812
									12.1397	0.060538
									12.1458	0.0598599
									12.152	0.0591152
									12.1581	0.0584438
									12.1642	0.05772
									12.1704	0.0570511
									12.1765	0.0564205
									12.1827	0.0557563
									12.1888	0.0550833
									12.195	0.0544779
									12.2011	0.0538782
									12.2072	0.0532623
									12.2134	0.0526746
									12.2195	0.0521004
									12.2257	0.0515472
									12.2318	0.050952
									12.238	0.0503791
									12.2441	0.0498614
									12.2503	0.0493436
									12.2564	0.0487728
									12.2625	0.0482707
									12.2687	0.0477239
									12.2748	0.0472314
									12.281	0.0467397
									12.2871	0.0462777
									12.2933	0.0457798
									12.2994	0.0453319
									12.3055	0.0448768
									12.3117	0.0444654
									12.3178	0.0440201
									12.324	0.0435876
									12.3301	0.0431821
									12.3363	0.0427408
									12.3424	0.0423156
									12.3486	0.0419436
									12.3547	0.0415824
									12.3608	0.0411826
									12.367	0.0408286
									12.3731	0.0404637
									12.3793	0.0401197
									12.3854	0.0397528
									12.3916	0.0394179
									12.3977	0.039088
									12.4038	0.038727
									12.41	0.0383769
									12.4161	0.0380686
									12.4223	0.0377793
									12.4284	0.0374555
									12.4346	0.0371709
									12.4407	0.0368821
									12.4468	0.0366061
									12.453	0.0363143
									12.4591	0.0360728
									12.4653	0.035799
									12.4714	0.0355395
									12.4776	0.0352534
									12.4837	0.0349874
									12.4899	0.0347396
									12.496	0.034513
									12.5021	0.0342714
									12.5083	0.0340504
									12.5144	0.0338105
									12.5206	0.0335913
									12.5267	0.0333906
									12.5329	0.0331644
									12.539	0.0329276
									12.5451	0.0327116
									12.5513	0.0325066
									12.5574	0.032281
									12.5636	0.032097
									12.5697	0.0319097
									12.5759	0.0317427
									12.582	0.0315569
									12.5882	0.0313732
									12.5943	0.0312233
									12.6004	0.031064
									12.6066	0.030888
									12.6127	0.030717
									12.6189	0.030558
									12.625	0.0303803
									12.6312	0.0302188
									12.6373	0.0300602
									12.6434	0.029926
									12.6496	0.029783
									12.6557	0.0296496
									12.6619	0.0295222
									12.668	0.0294078
									12.6742	0.0292762
									12.6803	0.0291329
									12.6865	0.0289829
									12.6926	0.0288472
									12.6987	0.0287031
									12.7049	0.0285876
									12.711	0.0284749
									12.7172	0.0283639
									12.7233	0.0282519
									12.7295	0.0281373
									12.7356	0.0280482
									12.7417	0.0279612
									12.7479	0.0278621
									12.754	0.0277562
									12.7602	0.0276513
									12.7663	0.0275291
									12.7725	0.0274336
									12.7786	0.0273451
									12.7847	0.0272637
									12.7909	0.0271862
									12.797	0.0270969
									12.8032	0.0270194
									12.8093	0.0269542
									12.8155	0.0268857
									12.8216	0.0267954
									12.8278	0.0267044
									12.8339	0.0265907
									12.84	0.026494
									12.8462	0.0264102
									12.8523	0.0263406
									12.8585	0.0262771
									12.8646	0.0262251
									12.8708	0.0261645
									12.8769	0.0261133
									12.883	0.026071
									12.8892	0.0260108
									12.8953	0.0259254
									12.9015	0.025846
									12.9076	0.0257588
									12.9138	0.025695
									12.9199	0.0256528
									12.9261	0.0255914
									12.9322	0.0255473
									12.9383	0.0255162
									12.9445	0.0254791
									12.9506	0.0254573
									12.9568	0.0254424
									12.9629	0.025393
									12.9691	0.0253301
									12.9752	0.0252715
									12.9813	0.0252248
									12.9875	0.0251937
									12.9936	0.025166
									12.9998	0.0251409
									13.0059	0.025115
									13.0121	0.0250881
									13.0182	0.0250627
									13.0244	0.0250572
									13.0305	0.0250234
									13.0366	0.0249605
									13.0428	0.0249196
									13.0489	0.0248851
									13.0551	0.0248376
									13.0612	0.0248108
									13.0674	0.024801
									13.0735	0.0247833
									13.0796	0.024758
									13.0858	0.0247441
									13.0919	0.0247416
									13.0981	0.0247309
									13.1042	0.024686
									13.1104	0.0246487
									13.1165	0.0246218
									13.1227	0.0245856
									13.1288	0.0245648
									13.1349	0.0245606
									13.1411	0.0245556
									13.1472	0.0245505
									13.1534	0.024551
									13.1595	0.0245605
									13.1657	0.024564
									13.1718	0.0245567
									13.1779	0.0245493
									13.1841	0.0245245
									13.1902	0.0244843
									13.1964	0.024465
									13.2025	0.0244765
									13.2087	0.0244887
									13.2148	0.0244895
									13.2209	0.0244902
									13.2271	0.0245168
									13.2332	0.0245309
									13.2394	0.0245364
									13.2455	0.0245365
									13.2517	0.0245365
									13.2578	0.0245211
									13.264	0.0245007
									13.2701	0.0245007
									13.2762	0.0245168
									13.2824	0.0245191
									13.2885	0.0245274
									13.2947	0.0245494
									13.3008	0.024573
									13.307	0.0245842
									13.3131	0.0245889
									13.3192	0.0245818
									13.3254	0.0245746
									13.3315	0.0245603
									13.3377	0.0245706
									13.3438	0.0245982
									13.35	0.0246208
									13.3561	0.024642
									13.3623	0.0246588
									13.3684	0.024693
									13.3745	0.0247276
									13.3807	0.0247367
									13.3868	0.0247407
									13.393	0.0247392
									13.3991	0.0247376
									13.4053	0.0247542
									13.4114	0.0247747
									13.4175	0.024791
									13.4237	0.0248167
									13.4298	0.0248456
									13.436	0.0248835
									13.4421	0.0249154
									13.4483	0.0249521
									13.4544	0.0249688
									13.4606	0.0249693
									13.4667	0.0249698
									13.4728	0.0249773
									13.479	0.0250017
									13.4851	0.0250395
									13.4913	0.0250735
									13.4974	0.0251031
									13.5036	0.0251398
									13.5097	0.0251775
									13.5158	0.0252267
									13.522	0.0252677
									13.5281	0.0252756
									13.5343	0.0252768
									13.5404	0.025278
									13.5466	0.0253053
									13.5527	0.0253443
									13.5588	0.0253832
									13.565	0.0254195
									13.5711	0.0254431
									13.5773	0.0254777
									13.5834	0.0255347
									13.5896	0.0255776
									13.5957	0.0255987
									13.6019	0.0256146
									13.608	0.0256159
									13.6141	0.0256241
									13.6203	0.0256425
									13.6264	0.025673
									13.6326	0.0257155
									13.6387	0.0257465
									13.6449	0.0257932
									13.651	0.0258433
									13.6571	0.0258916
									13.6633	0.0259162
									13.6694	0.0259274
									13.6756	0.0259348
									13.6817	0.0259356
									13.6879	0.025959
									13.694	0.0259968
									13.7002	0.0260258
									13.7063	0.0260565
									13.7124	0.0260908
									13.7186	0.0261375
									13.7247	0.0261928
									13.7309	0.0262254
									13.737	0.0262477
									13.7432	0.0262607
									13.7493	0.0262662
									13.7554	0.0262768
									13.7616	0.0263058
									13.7677	0.0263357
									13.7739	0.026375
									13.78	0.0264118
									13.7862	0.0264433
									13.7923	0.0264945
									13.7985	0.0265364
									13.8046	0.0265617
									13.8107	0.02656
									13.8169	0.0265584
									13.823	0.0265512
									13.8292	0.0265821
									13.8353	0.0266099
									13.8415	0.0266314
									13.8476	0.026657
									13.8537	0.026686
									13.8599	0.0267239
									13.866	0.0267523
									13.8722	0.0267737
									13.8783	0.0267718
									13.8845	0.0267699
									13.8906	0.0267619
									13.8967	0.026771
									13.9029	0.0268064
									13.909	0.0268288
									13.9152	0.026847
									13.9213	0.0268965
									13.9275	0.0269473
									13.9336	0.0269897
									13.9398	0.0270383
									13.9459	0.027067
									13.952	0.0270709
									13.9582	0.0270748
									13.9643	0.0270902
									13.9705	0.0271287
									13.9766	0.0271633
									13.9828	0.0272155
									13.9889	0.0272612
									13.995	0.0272921
									14.0012	0.0273464
									14.0073	0.0274035
									14.0135	0.0274424
									14.0196	0.0274697
									14.0258	0.0274746
									14.0319	0.0274796
									14.0381	0.0275027
									14.0442	0.0275397
									14.0503	0.0275758
									14.0565	0.0276055
									14.0626	0.0276481
									14.0688	0.0276953
									14.0749	0.0277435
									14.0811	0.0277812
									14.0872	0.0278038
									14.0933	0.0278138
									14.0995	0.0278166
									14.1056	0.0278421
									14.1118	0.0278764
									14.1179	0.0279145
									14.1241	0.0279456
									14.1302	0.0279658
									14.1364	0.0280023
									14.1425	0.0280605
									14.1486	0.0281111
									14.1548	0.0281358
									14.1609	0.0281523
									14.1671	0.0281723
									14.1732	0.0281821
									14.1794	0.0282014
									14.1855	0.0282461
									14.1916	0.0282867
									14.1978	0.0283316
									14.2039	0.0283756
									14.2101	0.02845
									14.2162	0.0285292
									14.2224	0.0285678
									14.2285	0.0285947
									14.2346	0.0286292
									14.2408	0.0286497
									14.2469	0.0286791
									14.2531	0.0287327
									14.2592	0.0288032
									14.2654	0.0288586
									14.2715	0.0288981
									14.2777	0.0289694
									14.2838	0.0290495
									14.2899	0.0291103
									14.2961	0.0291537
									14.3022	0.0291871
									14.3084	0.0292059
									14.3145	0.0292429
									14.3207	0.0292947
									14.3268	0.0293652
									14.3329	0.0294322
									14.3391	0.0294819
									14.3452	0.0295606
									14.3514	0.0296561
									14.3575	0.029738
									14.3637	0.0298052
									14.3698	0.0298634
									14.376	0.0298961
									14.3821	0.0299307
									14.3882	0.0299848
									14.3944	0.0300599
									14.4005	0.030122
									14.4067	0.0301876
									14.4128	0.0302556
									14.419	0.0303396
									14.4251	0.030427
									14.4312	0.0304917
									14.4374	0.0305343
									14.4435	0.0305846
									14.4497	0.0306187
									14.4558	0.0306518
									14.462	0.0307174
									14.4681	0.0307866
									14.4743	0.0308518
									14.4804	0.0309249
									14.4865	0.0310253
									14.4927	0.0311192
									14.4988	0.0312157
									14.505	0.0312881
									14.5111	0.0313514
									14.5173	0.0313951
[truncated: 1,213 more rows]

## Sheet: AUC of LBD-OD mutant complexes
WTLBDOD	0	0.00605392		QT23-OD	0	0.00588633		QT13-OD	0	0.00721184	0.0530283		QT12-OD	0	0.0031378		QT3-OD	0	0.00547027		QT2-OD	0	0.00716575
	0.151515	0.00080986			0.151515	0.636557			0.151515	0.49342	3.62809			0.20202	0.00190163			0.151515	0.388877			0.151515	0.479151
	0.30303	1.2926e-05			0.30303	0.0120759			0.30303	0.00487253	0.0358275			0.40404	0.000250049			0.30303	6.4813e-05			0.30303	0.000949119
	0.454545	1.7397e-05			0.454545	0.000220432			0.454545	5.87578e-05	0.000432043			0.606061	0.000930578			0.454545	1.2124e-10			0.454545	1.43603e-06
	0.606061	0.000160413			0.606061	7.30196e-06			0.606061	1.89268e-06	1.39168e-05			0.808081	0.00383614			0.606061	3.3043e-14			0.606061	7.6991e-09
	0.757576	0.00135766			0.757576	6.73653e-07			0.757576	2.3713e-07	1.74361e-06			1.0101	0.0072524			0.757576	1.69166e-14			0.757576	3.45116e-10
	0.909091	0.0049901			0.909091	2.36381e-07			0.909091	1.34378e-07	9.8807e-07			1.21212	0.0138632			0.909091	1.43097e-14			0.909091	6.73213e-15
	1.06061	0.00990872			1.06061	3.66653e-07			1.06061	3.29717e-07	2.42439e-06			1.41414	0.0504606			1.06061	7.43486e-15			1.06061	9.10144e-10
	1.21212	0.0183939			1.21212	2.2389e-06			1.21212	2.76681e-06	2.03442e-05			1.61616	0.250965			1.21212	3.49062e-14			1.21212	2.70681e-08
	1.36364	0.0453564			1.36364	3.71567e-05			1.36364	5.29459e-05	0.000389308			1.81818	0.743277			1.36364	9.74014e-15			1.36364	2.23991e-06
	1.51515	0.143831			1.51515	0.000953331			1.51515	0.00137944	0.0101429			2.0202	0.86261			1.51515	1.70174e-13			1.51515	0.00023133
	1.66667	0.419289			1.66667	0.0206271			1.66667	0.0285754	0.210113			2.22222	0.514855			1.66667	1.2455e-08			1.66667	0.0144032
	1.81818	0.780547			1.81818	0.225494			1.81818	0.3003	2.20809			2.42424	0.241931			1.81818	0.000119434			1.81818	0.314009
	1.9697	0.832784			1.9697	0.924252			1.9697	1.21088	8.9035			2.62626	0.131511			1.9697	0.0594431			1.9697	1.80652
	2.12121	0.550968			2.12121	1.33694			2.12121	1.75973	12.9392			2.82828	0.0846936			2.12121	1.37446			2.12121	2.76697
	2.27273	0.313643			2.27273	0.796803			2.27273	1.06015	7.79522			3.0303	0.0611846			2.27273	2.32437			2.27273	1.46111
	2.42424	0.190249			2.42424	0.261227			2.42424	0.347612	2.55597			3.23232	0.0477571			2.42424	0.648956			2.42424	0.402259
	2.57576	0.137981			2.57576	0.065034			2.57576	0.0860794	0.632937			3.43434	0.0412341			2.57576	0.071799			2.57576	0.0899253
	2.72727	0.114583			2.72727	0.016561			2.72727	0.0214722	0.157884			3.63636	0.0403818			2.72727	0.00679759			2.72727	0.0238964
	2.87879	0.0989146			2.87879	0.00533614			2.87879	0.0067047	0.0492992			3.83838	0.0433305			2.87879	0.00092917			2.87879	0.00952381
	3.0303	0.0812374			3.0303	0.00246569			3.0303	0.00295184	0.0217047			4.0404	0.0485868			3.0303	0.000241559			3.0303	0.00627017
	3.18182	0.0623178			3.18182	0.00166944			3.18182	0.00190694	0.0140217			4.24242	0.0523377			3.18182	0.000127222			3.18182	0.00665172
	3.33333	0.045462			3.33333	0.00164141			3.33333	0.00177514	0.0130525			4.44444	0.0521518			3.33333	0.000126252			3.33333	0.0101271
	3.48485	0.0335323			3.48485	0.00217273			3.48485	0.00221481	0.0162854			4.64647	0.0489424			3.48485	0.000205918			3.48485	0.0191738
	3.63636	0.026759			3.63636	0.00356523			3.63636	0.00344518	0.0253322			4.84849	0.0449759			3.63636	0.000458609			3.63636	0.0390198
	3.78788	0.024251			3.78788	0.0067056			3.78788	0.00612826	0.0450607			5.05051	0.0423724			3.78788	0.00120214			3.78788	0.075323
	3.93939	0.0254065			3.93939	0.0131921			3.93939	0.0116254	0.085481			5.25253	0.042206			3.93939	0.00325973			3.93939	0.125973
	4.09091	0.0301128			4.09091	0.0255304			4.09091	0.0218771	0.160861			5.45455	0.0447661			4.09091	0.00831836			4.09091	0.176489
	4.24242	0.0389795			4.24242	0.045912			4.24242	0.0389	0.286029			5.65657	0.0498655			4.24242	0.0189375			4.24242	0.206206
	4.39394	0.0525353			4.39394	0.0743361			4.39394	0.0633435	0.465761			5.85859	0.0567423			4.39394	0.0375081			4.39394	0.207074
	4.54545	0.0696145			4.54545	0.10647			4.54545	0.0929412	0.683391			6.06061	0.0641587			4.54545	0.0645898			4.54545	0.186594
	4.69697	0.0870642			4.69697	0.134455			4.69697	0.122884	0.90356			6.26263	0.0704338			4.69697	0.0981513			4.69697	0.158522
	4.84849	0.100622			4.84849	0.152737			4.84849	0.149074	1.09613			6.46465	0.0745854			4.84849	0.134703			4.84849	0.133858
	5	0.106751			5	0.158499			5	0.168191	1.2367			6.66667	0.0760059			5	0.169418			5	0.11548
	5.15151	0.106004			5.15151	0.155215			5.15151	0.180958	1.33057			6.86869	0.0746039			5.15151	0.199742			5.15151	0.103176
	5.30303	0.101339			5.30303	0.146788			5.30303	0.190721	1.40236			7.07071	0.0703395			5.30303	0.22318			5.30303	0.0962511
	5.45455	0.0963885			5.45455	0.137997			5.45455	0.200065	1.47107			7.27273	0.0632253			5.45455	0.236873			5.45455	0.0923817
	5.60606	0.0940543			5.60606	0.130837			5.60606	0.211014	1.55157			7.47475	0.0537933			5.60606	0.238752			5.60606	0.0896603
	5.75758	0.0960402			5.75758	0.126958			5.75758	0.225597	1.6588			7.67677	0.0429269			5.75758	0.227559			5.75758	0.0855561
	5.90909	0.103698			5.90909	0.127012			5.90909	0.24407	1.79463			7.87879	0.0319535			5.90909	0.203944			5.90909	0.0784822
	6.06061	0.117507			6.06061	0.131182			6.06061	0.265243	1.95031			8.08081	0.0222021			6.06061	0.171005			6.06061	0.067639
	6.21212	0.136896			6.21212	0.139159			6.21212	0.286633	2.10759			8.28283	0.0146481			6.21212	0.134077			6.21212	0.054112
	6.36364	0.159576			6.36364	0.150802			6.36364	0.303026	2.22813			8.48485	0.0093595			6.36364	0.0987199			6.36364	0.0399104
	6.51515	0.181036			6.51515	0.165137			6.51515	0.309553	2.27612			8.68687	0.00594211			6.51515	0.0688838			6.51515	0.0271047
	6.66667	0.195509			6.66667	0.179984			6.66667	0.300616	2.21041			8.88889	0.00383662			6.66667	0.0460827			6.66667	0.0170238
	6.81818	0.199001			6.81818	0.192576			6.81818	0.273669	2.01227			9.09091	0.00256267			6.81818	0.030055			6.81818	0.0100345
	6.9697	0.191753			6.9697	0.199111			6.9697	0.230712	1.69641			9.29293	0.0017968			6.9697	0.0194854			6.9697	0.00562789
	7.12121	0.177724			7.12121	0.195589			7.12121	0.177818	1.30748			9.49495	0.00132235			7.12121	0.0127959			7.12121	0.00304782
	7.27273	0.162119			7.27273	0.180298			7.27273	0.125362	0.921783			9.69697	0.00102209			7.27273	0.00863194			7.27273	0.00162251
	7.42424	0.148854			7.42424	0.154954			7.42424	0.0801437	0.589292			9.89899	0.000826558			7.42424	0.00607734			7.42424	0.000862868
	7.57576	0.140038			7.57576	0.123002			7.57576	0.046549	0.342272			10.101	0.000694976			7.57576	0.00450702			7.57576	0.000462066
	7.72727	0.135925			7.72727	0.0906003			7.72727	0.0248406	0.182651			10.303	0.000604962			7.72727	0.00353823			7.72727	0.000251074
	7.87879	0.135694			7.87879	0.0619698			7.87879	0.0121958	0.0896749			10.5051	0.000542183			7.87879	0.00294227			7.87879	0.000139323
	8.0303	0.137285			8.0303	0.0398286			8.0303	0.00557303	0.0409782			10.7071	0.000498177			8.0303	0.00257982			8.0303	7.89353e-05
	8.18182	0.13834			8.18182	0.0242925			8.18182	0.0024013	0.0176567			10.9091	0.000467976			8.18182	0.00237175			8.18182	4.5667e-05
	8.33333	0.135618			8.33333	0.0142713			8.33333	0.000996583	0.00732781			11.1111	0.000446894			8.33333	0.00226532			8.33333	2.69386e-05
	8.48485	0.127617			8.48485	0.00816141			8.48485	0.000403013	0.00296333			11.3131	0.000432131			8.48485	0.0022258			8.48485	1.62732e-05
	8.63636	0.113979			8.63636	0.00460927			8.63636	0.000161463	0.00118723			11.5152	0.000421448			8.63636	0.00222193			8.63636	1.00373e-05
	8.78788	0.0964609			8.78788	0.00260819			8.78788	6.52861e-05	0.000480044			11.7172	0.000412162			8.78788	0.00223978			8.78788	6.32688e-06
	8.93939	0.0778882			8.93939	0.00148956			8.93939	2.69454e-05	0.000198128			11.9192	0.000404535			8.93939	0.00225692			8.93939	4.07579e-06
	9.09091	0.0608037			9.09091	0.000861983			9.09091	1.15001e-05	8.45597e-05			12.1212	0.000396899			9.09091	0.00226429			9.09091	2.7066e-06
	9.24242	0.0466089			9.24242	0.000510089			9.24242	5.11058e-06	3.75778e-05			12.3232	0.00038895			9.24242	0.00225203			9.24242	1.85183e-06
	9.39394	0.035633			9.39394	0.000309375			9.39394	2.38732e-06	1.75538e-05			12.5252	0.000379394			9.39394	0.00221831			9.39394	1.30488e-06
	9.54546	0.027512			9.54546	0.000192481			9.54546	1.17245e-06	8.62093e-06			12.7273	0.000370879			9.54546	0.00216589			9.54546	9.50892e-07
	9.69697	0.0216565			9.69697	0.000122948			9.69697	6.06684e-07	4.46091e-06			12.9293	0.000363496			9.69697	0.0020935			9.69697	7.16414e-07
	9.84849	0.0174676			9.84849	8.05989e-05			9.84849	3.32185e-07	2.44254e-06			13.1313	0.000356557			9.84849	0.00200589			9.84849	5.56423e-07
	10	0.0144163			10	5.42208e-05			10	1.91004e-07	1.40444e-06			13.3333	0.000353943			10	0.00191288			10	4.4523e-07
	10.1515	0.0121688			10.1515	3.736e-05			10.1515	1.15491e-07	8.49201e-07			13.5353	0.000354325			10.1515	0.00181557			10.1515	3.65641e-07
	10.303	0.0104576			10.303	2.6311e-05			10.303	7.29953e-08	5.3673e-07			13.7374	0.000360613			10.303	0.0017164			10.303	3.06369e-07
	10.4545	0.00911124			10.4545	1.89663e-05			10.4545	4.81827e-08	3.54285e-07			13.9394	0.000371552			10.4545	0.00162144			10.4545	2.61087e-07
	10.6061	0.00802298			10.6061	1.3973e-05			10.6061	3.30312e-08	2.42877e-07			14.1414	0.00038925			10.6061	0.00152915			10.6061	2.24743e-07
	10.7576	0.00711296			10.7576	1.05325e-05			10.7576	2.34543e-08	1.72458e-07			14.3434	0.00041162			10.7576	0.00144398			10.7576	1.94481e-07
	10.9091	0.00634343			10.9091	8.10887e-06			10.9091	1.71575e-08	1.26158e-07			14.5455	0.000439721			10.9091	0.00136499			10.9091	1.68622e-07
	11.0606	0.00567405			11.0606	6.38213e-06			11.0606	1.2897e-08	9.4831e-08			14.7475	0.000469322			11.0606	0.00129181			11.0606	1.45885e-07
	11.2121	0.00508826			11.2121	5.12685e-06			11.2121	9.92501e-09	7.2978e-08			14.9495	0.000500721			11.2121	0.00122904			11.2121	1.26102e-07
	11.3636	0.00457161			11.3636	4.20257e-06			11.3636	7.78889e-09	5.72712e-08			15.1515	0.000527048			11.3636	0.00117522			11.3636	1.08724e-07
	11.5152	0.00411469			11.5152	3.50603e-06			11.5152	6.2073e-09	4.56419e-08			15.3535	0.000547471			11.5152	0.00112986			11.5152	9.33944e-08
	11.6667	0.00371656			11.6667	2.97213e-06			11.6667	5.01935e-09	3.6907e-08			15.5556	0.00055912			11.6667	0.00109135			11.6667	8.03889e-08
	11.8182	0.00337818			11.8182	2.55688e-06			11.8182	4.09622e-09	3.01193e-08			15.7576	0.000558586			11.8182	0.00106184			11.8182	6.93232e-08
	11.9697	0.00309092			11.9697	2.22355e-06			11.9697	3.36816e-09	2.47659e-08			15.9596	0.000548638			11.9697	0.00103989			11.9697	6.00564e-08
	12.1212	0.00286502			12.1212	1.9491e-06			12.1212	2.79487e-09	2.05505e-08			16.1616	0.000526895			12.1212	0.00102594			12.1212	5.25436e-08
	12.2727	0.00269442			12.2727	1.72122e-06			12.2727	2.3191e-09	1.70522e-08			16.3636	0.000502488			12.2727	0.00101727			12.2727	4.65594e-08
	12.4242	0.00258193			12.4242	1.52675e-06			12.4242	1.93131e-09	1.42008e-08			16.5657	0.000468734			12.4242	0.00101295			12.4242	4.18018e-08
	12.5758	0.00252445			12.5758	1.35884e-06			12.5758	1.61208e-09	1.18536e-08			16.7677	0.000436023			12.5758	0.00101639			12.5758	3.81358e-08
	12.7273	0.00252178			12.7273	1.21269e-06			12.7273	1.34328e-09	9.87705e-09			16.9697	0.00040856			12.7273	0.00102178			12.7273	3.53544e-08
	12.8788	0.0025735			12.8788	1.08255e-06			12.8788	1.11821e-09	8.2221e-09			17.1717	0.000379722			12.8788	0.00103211			12.8788	3.34193e-08
	13.0303	0.00267346			13.0303	9.66521e-07			13.0303	9.29874e-10	6.83731e-09			17.3737	0.000357137			13.0303	0.00104367			13.0303	3.20596e-08
	13.1818	0.00282008			13.1818	8.62583e-07			13.1818	7.72093e-10	5.67715e-09			17.5758	0.00034377			13.1818	0.00106001			13.1818	3.13345e-08
	13.3333	0.00300623			13.3333	7.69726e-07			13.3333	6.39106e-10	4.69931e-09			17.7778	0.00033176			13.3333	0.00107637			13.3333	3.10321e-08
	13.4848	0.00322408			13.4848	6.84703e-07			13.4848	5.29717e-10	3.89497e-09			17.9798	0.000327293			13.4848	0.00109542			13.4848	3.11883e-08
	13.6364	0.00345845			13.6364	6.08389e-07			13.6364	4.37089e-10	3.21389e-09			18.1818	0.000329587			13.6364	0.00111316			13.6364	3.16461e-08
	13.7879	0.00369942			13.7879	5.38426e-07			13.7879	3.6273e-10	2.66713e-09			18.3838	0.000340468			13.7879	0.00113515			13.7879	3.24064e-08
	13.9394	0.00393857			13.9394	4.74561e-07			13.9394	3.01411e-10	2.21625e-09			18.5859	0.000353761			13.9394	0.00115449			13.9394	3.33626e-08
	14.0909	0.00415756			14.0909	4.16142e-07			14.0909	2.51571e-10	1.84978e-09			18.7879	0.000372977			14.0909	0.00117577			14.0909	3.44431e-08
	14.2424	0.00435832			14.2424	3.62566e-07			14.2424	2.12171e-10	1.56008e-09			18.9899	0.000396999			14.2424	0.0011979			14.2424	3.55524e-08
	14.3939	0.00452326			14.3939	3.13865e-07			14.3939	1.80454e-10	1.32687e-09			19.1919	0.000426804			14.3939	0.00122025			14.3939	3.66391e-08
	14.5455	0.0046624			14.5455	2.6964e-07			14.5455	1.55529e-10	1.14359e-09			19.3939	0.000454274			14.5455	0.00124379			14.5455	3.75504e-08
	14.697	0.00478736			14.697	2.29983e-07			14.697	1.35965e-10	9.99745e-10			19.596	0.000482539			14.697	0.00127031			14.697	3.81785e-08
	14.8485	0.00488735			14.8485	1.94918e-07			14.8485	1.20878e-10	8.88805e-10			19.798	0.000509387			14.8485	0.00129836			14.8485	3.85062e-08
	15	0.00996811			15	3.28617e-07			15	2.18719e-10	1.60823e-09			20	0.00107411			15	0.00266054			15	7.68941e-08
