# Supplementary material for: LC8 enhances 53BP1 foci through heterogeneous bridging of 53BP1 oligomers
Source: eLife. 2025 Apr 29;14:e102179. doi: 10.7554/eLife.102179 (PMC12187134; doi:10.7554/eLife.102179)
Supplement: Figure 6—source data 1. [file elife-102179-fig6-data1.xlsx]

## Sheet: delta1206-1210
volume (mL)	Molar Mass 1	volume (mL)	Molar Mass 2	volume (mL)	Molar Mass 3	volume (mL)	Molar Mass 4		volume (mL)	RI
9.18481	398427	9.99377	241547	11.0741	147397	16.6139	28828.8		7.56207	-0.00186708
9.18993	396542	9.99889	240918	11.0792	147099	16.619	28708.9		7.56734	-0.00174671
9.19505	394256	10.004	240246	11.0843	146728	16.6241	28513.3		7.5726	-0.00163607
9.20017	392167	10.0091	239551	11.0894	146374	16.6293	28349.2		7.57787	-0.00150504
9.20529	390262	10.0142	238844	11.0946	146023	16.6344	28195.2		7.58314	-0.00136053
9.21041	387819	10.0194	238126	11.0997	145642	16.6395	28057.2		7.5884	-0.00116059
9.21553	385280	10.0245	237414	11.1048	145379	16.6446	27877.4		7.59367	-0.00116389
9.22065	383327	10.0296	236700	11.1099	145157	16.6497	27763		7.59893	-0.00116718
9.22577	381697	10.0347	235970	11.115	144954	16.6549	27613.4		7.6042	-0.00124055
9.23089	379621	10.0398	235160	11.1202	144707	16.66	27467.8		7.60947	-0.00145572
9.23601	377678	10.045	234363	11.1253	144454	16.6651	27325.2		7.61473	-0.00157155
9.24113	375563	10.0501	233635	11.1304	144157	16.6702	27215.5		7.62	-0.00160733
9.24625	373722	10.0552	232943	11.1355	143850	16.6753	27093		7.62526	-0.00158728
9.25137	371685	10.0603	232326	11.1406	143553	16.6805	26978		7.63053	-0.00150033
9.25649	369885	10.0654	231721	11.1458	143217	16.6856	26870.6		7.6358	-0.0013806
9.26161	368245	10.0706	231095	11.1509	142787	16.6907	26762.2		7.64106	-0.0012633
9.26673	366389	10.0757	230494	11.156	142327	16.6958	26681.4		7.64633	-0.00107807
9.27185	364506	10.0808	229875	11.1611	141951	16.7009	26569.9		7.65159	-0.000904142
9.27697	362745	10.0859	229237	11.1662	141599	16.7061	26443.1		7.65686	-0.000747548
9.28209	361000	10.091	228544	11.1714	141258	16.7112	26329.5		7.66213	-0.000709713
9.28721	359136	10.0962	227847	11.1765	140980	16.7163	26213.1		7.66739	-0.000723072
9.29233	357495	10.1013	227139	11.1816	140744	16.7214	26088.7		7.67266	-0.00073643
9.29745	355910	10.1064	226352	11.1867	140546	16.7265	25956.8		7.67792	-0.00101462
9.30257	354307	10.1115	225566	11.1918	140333	16.7317	25839.9		7.68319	-0.00116882
9.30769	352713	10.1166	224765	11.197	140117	16.7368	25714.2		7.68846	-0.00124643
9.31281	351149	10.1218	224039	11.2021	139852	16.7419	25607		7.69372	-0.00125559
9.31793	349590	10.1269	223382	11.2072	139567	16.747	25500.4		7.69899	-0.00117509
9.32305	348002	10.132	222835	11.2123	139259	16.7521	25416.3		7.70425	-0.00106386
9.32817	346515	10.1371	222224	11.2174	138969	16.7572	25312.2		7.70952	-0.000977367
9.33329	345025	10.1422	221637	11.2226	138665	16.7624	25226.7		7.71479	-0.00084762
9.33841	343478	10.1474	221028	11.2277	138350	16.7675	25116.1		7.72005	-0.00066734
9.34353	341927	10.1525	220407	11.2328	138000	16.7726	25021.6		7.72532	-0.000524489
9.34865	340502	10.1576	219728	11.2379	137622	16.7777	24930.1		7.73058	-0.000468428
9.35377	338966	10.1627	219070	11.243	137293	16.7828	24860		7.73585	-0.000455071
9.35889	337511	10.1678	218421	11.2482	137049	16.788	24783.1		7.74112	-0.000572374
9.36401	336174	10.173	217737	11.2533	136837	16.7931	24679.8		7.74638	-0.000689677
9.36913	334895	10.1781	217000	11.2584	136616	16.7982	24595.4		7.75165	-0.000848102
9.37425	333616	10.1832	216265	11.2635	136408	16.8033	24524.7		7.75691	-0.000970647
9.37937	332313	10.1883	215564	11.2686	136186	16.8084	24448		7.76218	-0.0010309
9.38449	331032	10.1934	214906	11.2738	135934	16.8136	24361.1		7.76745	-0.000971083
9.38961	329725	10.1986	214394	11.2789	135650	16.8187	24281.7		7.77271	-0.000857004
9.39473	328462	10.2037	213944	11.284	135358	16.8238	24189		7.77798	-0.000739188
9.39985	327158	10.2088	213461	11.2891	135048	16.8289	24099.9		7.78324	-0.000633571
9.40497	325892	10.2139	212930	11.2942	134748	16.834	24002		7.78851	-0.000517829
9.41009	324631	10.219	212365	11.2994	134428	16.8392	23911.5		7.79378	-0.000387288
9.41521	323336	10.2242	211726	11.3045	134108	16.8443	23824.2		7.79904	-0.000210572
9.42033	321942	10.2293	211069	11.3096	133811	16.8494	23742.7		7.80431	-0.000240294
9.42545	320715	10.2344	210413	11.3147	133532	16.8545	23656.8		7.80957	-0.000270016
9.43057	319662	10.2395	209795	11.3198	133312	16.8596	23572.5		7.81484	-0.000369825
9.43569	318745	10.2446	209167	11.325	133116	16.8648	23495.9		7.82011	-0.000563878
9.44081	317778	10.2498	208418	11.3301	132875	16.8699	23424.3		7.82537	-0.000671322
9.44593	316742	10.2549	207691	11.3352	132636	16.875	23362.2		7.83064	-0.000724561
9.45105	315663	10.26	207122	11.3403	132389	16.8801	23308.5		7.8359	-0.000720306
9.45617	314572	10.2651	206674	11.3454	132126	16.8852	23262.1		7.84117	-0.000624985
9.46129	313452	10.2702	206226	11.3506	131834	16.8904	23210.6		7.84643	-0.000481927
9.46641	312338	10.2754	205751	11.3557	131520	16.8955	23138.4		7.8517	-0.000363458
9.47153	311185	10.2805	205274	11.3608	131216	16.9006	23066.6		7.85697	-0.00023692
9.47665	310051	10.2856	204765	11.3659	130910	16.9057	22997		7.86223	-0.000113592
9.48177	308894	10.2907	204289	11.371	130590	16.9108	22929.9		7.8675	3.94406e-05
9.48689	307755	10.2958	203721	11.3762	130254	16.916	22861.3		7.87276	5.81239e-05
9.49201	306789	10.301	203146	11.3813	129955	16.9211	22799.5		7.87803	1.32125e-05
9.49713	305935	10.3061	202399	11.3864	129751	16.9262	22744.4		7.8833	-3.1699e-05
9.50225	305241			11.3915	129632	16.9313	22684.7		7.88856	-0.00027186
9.50737	304542			11.3966	129513	16.9364	22626.1		7.89383	-0.000403032
9.51249	303698			11.4018	129431	16.9416	22576.2		7.89909	-0.000469439
9.51761	302832			11.4069	129326	16.9467	22525		7.90436	-0.000494044
9.52273	302084			11.412	129208	16.9518	22482.2		7.90963	-0.000432463
9.52785	301249			11.4171	129002	16.9569	22429.6		7.91489	-0.000313643
9.53297	300323			11.4222	128728	16.962	22365.7		7.92016	-0.000225472
9.53809	299253			11.4274	128473	16.9672	22313.7		7.92542	-9.72998e-05
9.54321	298233			11.4325	128155	16.9723	22267.8		7.93069	3.55524e-05
9.54833	297380			11.4376	127862	16.9774	22221.8		7.93596	0.000164851
9.55345	296386			11.4427	127546	16.9825	22193.2		7.94122	0.000208655
9.55857	295111			11.4478	127221	16.9876	22165		7.94649	0.000204444
				11.453	127012	16.9928	22129.4		7.95175	0.000200234
				11.4581	126999	16.9979	22108.8		7.95702	-8.65556e-05
				11.4632	126925	17.003	22063.6		7.96229	-0.00032611
				11.4683	126782	17.0081	22006.8		7.96755	-0.000450868
				11.4734	126586	17.0132	21954.1		7.97282	-0.000510128
				11.4786	126402	17.0184	21913.1		7.97808	-0.000466542
				11.4837	126174	17.0235	21877.4		7.98335	-0.000369044
				11.4888	125902	17.0286	21828.7		7.98862	-0.000296496
				11.4939	125602	17.0337	21766.9		7.99388	-0.000213286
				11.499	125306	17.0388	21714.7		7.99915	-9.45633e-05
				11.5042	125068	17.044	21656.3		8.00441	3.15432e-05
				11.5093	124826	17.0491	21600.9		8.00968	0.00016072
				11.5144	124509	17.0542	21551.1		8.01495	0.000112183
				11.5195	124188	17.0593	21512.5		8.02021	6.36461e-05
				11.5246	123963	17.0644	21492.1		8.02548	-5.59902e-05
				11.5298	123838	17.0696	21458.5		8.03074	-0.000254296
				11.5349	123734	17.0747	21426.8		8.03601	-0.000366658
				11.54	123578	17.0798	21383.3		8.04128	-0.00041887
				11.5451	123408	17.0849	21344.7		8.04654	-0.000387125
				11.5502	123299	17.09	21304.7		8.05181	-0.000255182
				11.5554	123103	17.0952	21265.6		8.05707	-0.000146888
				11.5605	122865	17.1003	21216.4		8.06234	-6.21432e-05
				11.5656	122586	17.1054	21172		8.06761	5.67856e-05
				11.5707	122351	17.1105	21139.4		8.07287	0.000187259
				11.5758	121944	17.1156	21104.8		8.07814	0.000322492
						17.1208	21072.7		8.0834	0.00033992
						17.1259	21041.2		8.08867	0.00029029
						17.131	21005.2		8.09394	0.000240661
						17.1361	20973.9		8.0992	-1.7006e-05
						17.1412	20973.1		8.10447	-0.000191095
						17.1464	20952.4		8.10973	-0.000287771
						17.1515	20961.4		8.115	-0.000322258
						17.1566	20949.3		8.12027	-0.000269239
						17.1617	20918.2		8.12553	-0.000170431
						17.1668	20894.3		8.1308	-6.7187e-05
						17.172	20873.1		8.13606	4.93861e-05
						17.1771	20830.3		8.14133	0.000165067
						17.1822	20778.8		8.1466	0.000275252
						17.1873	20744.6		8.15186	0.000323457
						17.1924	20708.6		8.15713	0.000316849
						17.1976	20698.6		8.16239	0.000310241
						17.2027	20682.5		8.16766	5.53966e-05
						17.2078	20690.4		8.17293	-0.000110727
						17.2129	20689.2		8.17819	-0.000175597
						17.218	20677.4		8.18346	-0.000229582
						17.2232	20659.6		8.18872	-0.000196011
						17.2283	20649.3		8.19399	-5.37938e-05
						17.2334	20623		8.19926	3.61003e-05
						17.2385	20600.6		8.20452	0.000154129
						17.2436	20577		8.20979	0.000299075
						17.2488	20566.2		8.21505	0.000412626
						17.2539	20572		8.22032	0.000579302
						17.259	20560.1		8.22558	0.000547816
						17.2641	20528.8		8.23085	0.00051633
						17.2692	20490.4		8.23612	0.000418636
						17.2744	20477.6		8.24138	0.000225564
						17.2795	20512.9		8.24665	0.000147732
						17.2846	20533.4		8.25191	0.000120378
						17.2897	20543.5		8.25718	0.00014578
						17.2948	20547		8.26245	0.000267858
						17.3	20531.4		8.26771	0.000404514
						17.3051	20498.9		8.27298	0.000537789
						17.3102	20433.2		8.27824	0.000705608
									8.28351	0.000910956
									8.28878	0.00110054
									8.29404	0.0011575
									8.29931	0.00115843
									8.30457	0.00107305
									8.30984	0.000987669
									8.31511	0.000936848
									8.32037	0.000941736
									8.32564	0.00101547
									8.3309	0.00121916
									8.33617	0.00142467
									8.34144	0.00163948
									8.3467	0.00186997
									8.35197	0.00215102
									8.35723	0.00240683
									8.3625	0.00266212
									8.36777	0.00274086
									8.37303	0.00274306
									8.3783	0.00274412
									8.38356	0.00274518
									8.38883	0.00281761
									8.3941	0.00298175
									8.39936	0.00323494
									8.40463	0.00355328
									8.40989	0.00384726
									8.41516	0.00413579
									8.42043	0.00447415
									8.42569	0.00485003
									8.43096	0.0052474
									8.43622	0.00557281
									8.44149	0.0057191
									8.44676	0.00574298
									8.45202	0.00580661
									8.45729	0.00596729
									8.46255	0.00619342
									8.46782	0.00655228
									8.47309	0.00695553
									8.47835	0.00742699
									8.48362	0.00785689
									8.48888	0.00834535
									8.49415	0.00883355
									8.49942	0.00937288
									8.50468	0.00991755
									8.50995	0.0103464
									8.51521	0.0105731
									8.52048	0.0108464
									8.52575	0.0111999
									8.53101	0.0116229
									8.53628	0.0122054
									8.54154	0.0129193
									8.54681	0.0136386
									8.55208	0.0143434
									8.55734	0.0151524
									8.56261	0.0159406
									8.56787	0.016839
									8.57314	0.0177375
									8.57841	0.0186309
									8.58367	0.0193195
									8.58894	0.0199468
									8.5942	0.0207255
									8.59947	0.0216208
									8.60473	0.0225934
									8.61	0.0236632
									8.61527	0.0249044
									8.62053	0.0260765
									8.6258	0.0273895
									8.63106	0.0286537
									8.63633	0.0300437
									8.6416	0.0313637
									8.64686	0.0327787
									8.65213	0.034
									8.65739	0.0352467
									8.66266	0.0364402
									8.66793	0.0378168
									8.67319	0.039223
									8.67846	0.0408736
									8.68372	0.0425358
									8.68899	0.0443216
									8.69426	0.0460602
									8.69952	0.0477908
									8.70479	0.0497249
									8.71005	0.051709
									8.71532	0.0535816
									8.72059	0.0553705
									8.72585	0.0572823
									8.73112	0.0590391
									8.73638	0.0609787
									8.74165	0.0629451
									8.74692	0.0652416
									8.75218	0.067462
									8.75745	0.0697657
									8.76271	0.0723576
									8.76798	0.0749136
									8.77325	0.0773577
									8.77851	0.0798455
									8.78378	0.0826232
									8.78904	0.0852058
									8.79431	0.08806
									8.79958	0.0906437
									8.80484	0.0934445
									8.81011	0.0962004
									8.81537	0.0994532
									8.82064	0.10263
									8.82591	0.106166
									8.83117	0.109614
									8.83644	0.113327
									8.8417	0.116807
									8.84697	0.120647
									8.85224	0.12435
									8.8575	0.128426
									8.86277	0.132494
									8.86803	0.136545
									8.8733	0.140893
									8.87857	0.145317
									8.88383	0.149952
									8.8891	0.154784
									8.89436	0.160168
									8.89963	0.165254
									8.9049	0.170828
									8.91016	0.176127
									8.91543	0.181918
									8.92069	0.187441
									8.92596	0.193141
									8.93123	0.199764
									8.93649	0.206619
									8.94176	0.213398
									8.94702	0.220006
									8.95229	0.227352
									8.95756	0.23478
									8.96282	0.243241
									8.96809	0.251269
									8.97335	0.260011
									8.97862	0.267736
									8.98388	0.276442
									8.98915	0.284775
									8.99442	0.293638
									8.99968	0.302333
									9.00495	0.312303
									9.01021	0.321485
									9.01548	0.330943
									9.02075	0.340463
									9.02601	0.351328
									9.03128	0.361538
									9.03654	0.371511
									9.04181	0.382719
									9.04708	0.393766
									9.05234	0.404093
									9.05761	0.414699
									9.06287	0.426966
									9.06814	0.438256
									9.07341	0.450564
									9.07867	0.462461
									9.08394	0.474856
									9.0892	0.486162
									9.09447	0.497817
									9.09974	0.510694
									9.105	0.523169
									9.11027	0.535197
									9.11553	0.547001
									9.1208	0.559512
									9.12607	0.570937
									9.13133	0.58344
									9.1366	0.59502
									9.14186	0.608197
									9.14713	0.620618
									9.1524	0.633294
									9.15766	0.644449
									9.16293	0.656886
									9.16819	0.669009
									9.17346	0.681474
									9.17873	0.692897
									9.18399	0.705064
									9.18926	0.71621
									9.19452	0.727914
									9.19979	0.738984
									9.20506	0.749432
									9.21032	0.760994
									9.21559	0.772672
									9.22085	0.783172
									9.22612	0.792674
									9.23139	0.80306
									9.23665	0.8128
									9.24192	0.822784
									9.24718	0.831851
									9.25245	0.841499
									9.25772	0.850035
									9.26298	0.858059
									9.26825	0.866626
									9.27351	0.874763
									9.27878	0.882321
									9.28405	0.889808
									9.28931	0.897482
									9.29458	0.903716
									9.29984	0.910225
									9.30511	0.916261
									9.31038	0.922424
									9.31564	0.927673
									9.32091	0.933169
									9.32617	0.937926
									9.33144	0.942541
									9.3367	0.946694
									9.34197	0.950848
									9.34724	0.954359
									9.3525	0.957865
									9.35777	0.960821
									9.36303	0.963273
									9.3683	0.965231
									9.37357	0.967074
									9.37883	0.968803
									9.3841	0.970103
									9.38936	0.971129
									9.39463	0.971976
									9.3999	0.972573
									9.40516	0.972686
									9.41043	0.972715
									9.41569	0.97242
									9.42096	0.972126
									9.42623	0.971136
									9.43149	0.969756
									9.43676	0.967945
									9.44202	0.966033
									9.44729	0.964065
									9.45256	0.961925
									9.45782	0.959431
									9.46309	0.957026
									9.46835	0.954259
									9.47362	0.951605
									9.47889	0.948626
									9.48415	0.945629
									9.48942	0.942149
									9.49468	0.938321
									9.49995	0.933957
									9.50522	0.92976
									9.51048	0.925335
									9.51575	0.920948
									9.52101	0.916293
									9.52628	0.91189
									9.53155	0.907198
									9.53681	0.902827
									9.54208	0.898396
									9.54734	0.893592
									9.55261	0.888877
									9.55788	0.884354
									9.56314	0.879293
									9.56841	0.873575
									9.57367	0.868268
									9.57894	0.862823
									9.58421	0.8576
									9.58947	0.85204
									9.59474	0.847084
									9.6	0.842215
									9.60527	0.836994
									9.61054	0.83205
									9.6158	0.827443
									9.62107	0.82293
									9.62633	0.818099
									9.6316	0.813235
									9.63687	0.807659
									9.64213	0.802667
									9.6474	0.797684
									9.65266	0.793022
									9.65793	0.788041
									9.6632	0.783733
									9.66846	0.779339
									9.67373	0.77529
									9.67899	0.771245
									9.68426	0.767563
									9.68953	0.764063
									9.69479	0.760389
									9.70006	0.756905
									9.70532	0.752878
									9.71059	0.749086
									9.71585	0.745431
									9.72112	0.742266
									9.72639	0.738902
									9.73165	0.735947
									9.73692	0.733102
									9.74218	0.730386
									9.74745	0.727788
									9.75272	0.7254
									9.75798	0.723298
									9.76325	0.72147
									9.76851	0.719739
									9.77378	0.717657
									9.77905	0.715652
									9.78431	0.713733
									9.78958	0.71224
									9.79484	0.710746
									9.80011	0.709517
									9.80538	0.70846
									9.81064	0.707636
									9.81591	0.706897
									9.82117	0.706365
									9.82644	0.705905
									9.83171	0.705575
									9.83697	0.705305
									9.84224	0.70495
									9.8475	0.704466
									9.85277	0.70409
									9.85804	0.703902
									9.8633	0.703828
									9.86857	0.703839
									9.87383	0.704007
									9.8791	0.704284
									9.88437	0.704663
									9.88963	0.705099
									9.8949	0.70565
									9.90016	0.706213
									9.90543	0.706851
									9.9107	0.707398
									9.91596	0.707757
									9.92123	0.708081
									9.92649	0.708464
									9.93176	0.708909
									9.93703	0.709383
									9.94229	0.709975
									9.94756	0.710566
									9.95282	0.711206
									9.95809	0.711826
									9.96336	0.712525
									9.96862	0.71316
									9.97389	0.71382
									9.97915	0.714354
									9.98442	0.714678
									9.98969	0.714796
									9.99495	0.714924
									10.0002	0.715054
									10.0055	0.715152
									10.0107	0.715252
									10.016	0.715393
									10.0213	0.715474
									10.0265	0.715479
									10.0318	0.715481
									10.0371	0.715457
									10.0423	0.715432
									10.0476	0.715306
									10.0529	0.714851
									10.0581	0.714152
									10.0634	0.713336
									10.0687	0.712596
									10.0739	0.711755
									10.0792	0.710886
									10.0845	0.710043
									10.0897	0.709106
									10.095	0.708156
									10.1003	0.707244
									10.1055	0.706273
									10.1108	0.705151
									10.1161	0.704088
									10.1213	0.702651
									10.1266	0.700937
									10.1319	0.698932
									10.1371	0.697156
									10.1424	0.695204
									10.1477	0.693303
									10.1529	0.69127
									10.1582	0.68935
									10.1635	0.687232
									10.1687	0.685297
									10.174	0.683245
									10.1793	0.681211
									10.1845	0.678994
									10.1898	0.676733
									10.1951	0.674095
									10.2003	0.670967
									10.2056	0.668014
									10.2109	0.665223
									10.2161	0.662341
									10.2214	0.659284
									10.2267	0.656559
									10.2319	0.65354
									10.2372	0.650664
									10.2425	0.647723
									10.2477	0.644949
									10.253	0.642214
									10.2583	0.639112
									10.2635	0.635621
									10.2688	0.631961
									10.274	0.628428
									10.2793	0.624734
									10.2846	0.621288
									10.2898	0.617496
									10.2951	0.614154
									10.3004	0.610575
									10.3056	0.607248
									10.3109	0.603732
									10.3162	0.600534
									10.3214	0.597059
									10.3267	0.593751
									10.332	0.589928
									10.3372	0.585964
									10.3425	0.581968
									10.3478	0.577887
									10.353	0.573899
									10.3583	0.57002
									10.3636	0.566371
									10.3688	0.562527
									10.3741	0.558979
									10.3794	0.555206
									10.3846	0.551819
									10.3899	0.548125
									10.3952	0.54477
									10.4004	0.54103
									10.4057	0.537036
									10.411	0.532614
									10.4162	0.528645
									10.4215	0.524904
									10.4268	0.520772
									10.432	0.516832
									10.4373	0.513262
									10.4426	0.509743
									10.4478	0.505972
									10.4531	0.502637
									10.4584	0.499016
									10.4636	0.495747
									10.4689	0.492168
									10.4742	0.488506
									10.4794	0.484211
									10.4847	0.480411
									10.49	0.476388
									10.4952	0.472312
									10.5005	0.46823
									10.5058	0.464886
									10.511	0.461325
									10.5163	0.457927
									10.5215	0.454524
									10.5268	0.451387
									10.5321	0.448334
									10.5373	0.445068
									10.5426	0.441804
									10.5479	0.437912
									10.5531	0.434264
									10.5584	0.430635
									10.5637	0.427351
									10.5689	0.423812
									10.5742	0.420672
									10.5795	0.416738
									10.5847	0.412799
									10.59	0.409768
									10.5953	0.40679
									10.6005	0.403899
									10.6058	0.401218
									10.6111	0.398434
									10.6163	0.394987
									10.6216	0.391757
									10.6269	0.388547
									10.6321	0.385722
									10.6374	0.382603
									10.6427	0.37988
									10.6479	0.377134
									10.6532	0.374629
									10.6585	0.372016
									10.6637	0.369648
									10.669	0.367192
									10.6743	0.365002
									10.6795	0.362826
									10.6848	0.360107
									10.6901	0.357203
									10.6953	0.354682
									10.7006	0.352346
									10.7059	0.349819
									10.7111	0.347446
									10.7164	0.344955
									10.7217	0.342783
									10.7269	0.340734
									10.7322	0.338923
									10.7375	0.337113
									10.7427	0.33545
									10.748	0.333741
									10.7533	0.331944
									10.7585	0.32991
									10.7638	0.327774
									10.769	0.325955
									10.7743	0.324297
									10.7796	0.322719
									10.7848	0.321236
									10.7901	0.319934
									10.7954	0.31858
									10.8006	0.317475
									10.8059	0.316356
									10.8112	0.315348
									10.8164	0.314369
									10.8217	0.313374
									10.827	0.312088
									10.8322	0.310804
									10.8375	0.309678
									10.8428	0.308789
									10.848	0.307955
									10.8533	0.307214
									10.8586	0.306696
									10.8638	0.306166
									10.8691	0.305731
									10.8744	0.305382
									10.8796	0.305123
									10.8849	0.304943
									10.8902	0.304796
									10.8954	0.304457
									10.9007	0.304036
									10.906	0.303753
									10.9112	0.303635
									10.9165	0.303596
									10.9218	0.303699
									10.927	0.303939
									10.9323	0.304235
									10.9376	0.304566
									10.9428	0.305047
									10.9481	0.305534
									10.9534	0.30613
									10.9586	0.306755
									10.9639	0.307285
									10.9692	0.307637
									10.9744	0.308064
									10.9797	0.308616
									10.985	0.309289
									10.9902	0.310018
									10.9955	0.310876
									11.0008	0.311876
									11.006	0.31286
									11.0113	0.313835
									11.0166	0.314852
									11.0218	0.316028
									11.0271	0.317171
									11.0323	0.318329
									11.0376	0.31926
									11.0429	0.320204
									11.0481	0.321172
									11.0534	0.322311
									11.0587	0.323431
									11.0639	0.32469
									11.0692	0.325937
									11.0745	0.327166
									11.0797	0.328541
									11.085	0.329945
									11.0903	0.331275
									11.0955	0.332603
									11.1008	0.334005
									11.1061	0.335146
									11.1113	0.336247
									11.1166	0.337252
									11.1219	0.338415
									11.1271	0.339541
									11.1324	0.34083
									11.1377	0.342046
									11.1429	0.343315
									11.1482	0.344649
									11.1535	0.346281
									11.1587	0.347651
									11.164	0.348843
									11.1693	0.350089
									11.1745	0.351119
									11.1798	0.351929
									11.1851	0.352703
									11.1903	0.353559
									11.1956	0.354362
									11.2009	0.355251
									11.2061	0.356142
									11.2114	0.3571
									11.2167	0.357919
									11.2219	0.358757
									11.2272	0.359563
									11.2325	0.360406
									11.2377	0.361163
									11.243	0.361774
									11.2483	0.362157
									11.2535	0.362428
									11.2588	0.362719
									11.2641	0.362992
									11.2693	0.363294
									11.2746	0.363601
									11.2798	0.363956
									11.2851	0.364248
									11.2904	0.364536
									11.2956	0.364797
									11.3009	0.36501
									11.3062	0.365057
									11.3114	0.365043
									11.3167	0.365029
									11.322	0.364585
									11.3272	0.364211
									11.3325	0.363895
									11.3378	0.363513
									11.343	0.363137
									11.3483	0.362805
									11.3536	0.362456
									11.3588	0.362073
									11.3641	0.361713
									11.3694	0.361262
									11.3746	0.36081
									11.3799	0.360289
									11.3852	0.359564
									11.3904	0.358457
									11.3957	0.357365
									11.401	0.356287
									11.4062	0.355294
									11.4115	0.354343
									11.4168	0.353369
									11.422	0.352372
									11.4273	0.351372
									11.4326	0.350459
									11.4378	0.349446
									11.4431	0.348455
									11.4484	0.347278
									11.4536	0.345775
									11.4589	0.343866
									11.4642	0.342242
									11.4694	0.340596
									11.4747	0.339109
									11.48	0.337495
									11.4852	0.336066
									11.4905	0.334588
									11.4958	0.333149
									11.501	0.331695
									11.5063	0.33017
									11.5116	0.328677
									11.5168	0.327241
									11.5221	0.325698
									11.5273	0.323665
									11.5326	0.321594
									11.5379	0.319479
									11.5431	0.317574
									11.5484	0.315485
									11.5537	0.313615
									11.5589	0.311753
									11.5642	0.309958
									11.5695	0.30808
									11.5747	0.30636
									11.58	0.304666
									11.5853	0.302849
									11.5905	0.300992
									11.5958	0.298914
									11.6011	0.296591
									11.6063	0.294158
									11.6116	0.292085
									11.6169	0.289769
									11.6221	0.287657
									11.6274	0.285517
									11.6327	0.283569
									11.6379	0.281457
									11.6432	0.279591
									11.6485	0.277237
									11.6537	0.274985
									11.659	0.272982
									11.6643	0.270967
									11.6695	0.268586
									11.6748	0.265942
									11.6801	0.263537
									11.6853	0.261338
									11.6906	0.259163
									11.6959	0.256945
									11.7011	0.25499
									11.7064	0.252855
									11.7117	0.250736
									11.7169	0.248282
									11.7222	0.246184
									11.7275	0.244245
									11.7327	0.242317
									11.738	0.239765
									11.7433	0.236968
									11.7485	0.23452
									11.7538	0.232199
									11.7591	0.229926
									11.7643	0.227919
									11.7696	0.226079
									11.7749	0.224037
									11.7801	0.222208
									11.7854	0.22033
									11.7906	0.218604
									11.7959	0.216489
									11.8012	0.214386
									11.8064	0.212059
									11.8117	0.20984
									11.817	0.207548
									11.8222	0.205537
									11.8275	0.203425
									11.8328	0.201519
									11.838	0.199765
									11.8433	0.197911
									11.8486	0.196088
									11.8538	0.19444
									11.8591	0.192886
									11.8644	0.191217
									11.8696	0.189701
									11.8749	0.187862
									11.8802	0.18583
									11.8854	0.183649
									11.8907	0.181793
									11.896	0.17989
									11.9012	0.178142
									11.9065	0.176463
									11.9118	0.174955
									11.917	0.173451
									11.9223	0.171879
									11.9276	0.170399
									11.9328	0.168996
									11.9381	0.167675
									11.9434	0.16615
									11.9486	0.164357
									11.9539	0.162318
									11.9592	0.160624
									11.9644	0.158942
									11.9697	0.157321
									11.975	0.155744
									11.9802	0.154387
									11.9855	0.152946
									11.9908	0.151599
									11.996	0.150243
									12.0013	0.149001
									12.0066	0.147842
									12.0118	0.146552
									12.0171	0.144996
									12.0224	0.143323
									12.0276	0.14171
									12.0329	0.14017
									12.0381	0.138785
									12.0434	0.137369
									12.0487	0.136181
									12.0539	0.134945
									12.0592	0.13377
									12.0645	0.13265
									12.0697	0.131608
									12.075	0.130515
									12.0803	0.129496
									12.0855	0.128296
									12.0908	0.126733
									12.0961	0.125298
									12.1013	0.123899
									12.1066	0.122657
									12.1119	0.121369
									12.1171	0.120276
									12.1224	0.119178
									12.1277	0.118147
									12.1329	0.117131
									12.1382	0.11621
									12.1435	0.115237
									12.1487	0.114362
									12.154	0.113331
									12.1593	0.112069
									12.1645	0.110653
									12.1698	0.109444
									12.1751	0.108342
									12.1803	0.107188
									12.1856	0.106229
									12.1909	0.105276
									12.1961	0.104375
									12.2014	0.103469
									12.2067	0.102692
									12.2119	0.101867
									12.2172	0.101124
									12.2225	0.100311
									12.2277	0.099303
									12.233	0.0981321
									12.2383	0.0969622
									12.2435	0.0960157
									12.2488	0.0949919
									12.2541	0.0941337
									12.2593	0.0933185
									12.2646	0.0925801
									12.2699	0.0918185
									12.2751	0.0911693
									12.2804	0.0904808
									12.2856	0.0898364
									12.2909	0.0891743
									12.2962	0.0884109
									12.3014	0.0873023
									12.3067	0.0862621
									12.312	0.0853299
									12.3172	0.0845197
									12.3225	0.0837449
									12.3278	0.0830081
									12.333	0.0823543
									12.3383	0.0817292
									12.3436	0.081173
									12.3488	0.0805871
									12.3541	0.0800613
									12.3594	0.0795119
									12.3646	0.0789052
									12.3699	0.078006
									12.3752	0.0770844
									12.3804	0.0762741
									12.3857	0.0754845
									12.391	0.0747846
									12.3962	0.0742441
									12.4015	0.0737643
									12.4068	0.0732237
									12.412	0.0727737
									12.4173	0.0723293
									12.4226	0.0719267
									12.4278	0.0715087
									12.4331	0.071075
									12.4384	0.0703534
									12.4436	0.0695454
									12.4489	0.0687759
									12.4542	0.0681464
									12.4594	0.0674914
									12.4647	0.0669902
									12.47	0.0665839
									12.4752	0.0661763
									12.4805	0.0657308
									12.4858	0.065353
									12.491	0.0650156
									12.4963	0.064702
									12.5016	0.0643929
									12.5068	0.0639146
									12.5121	0.0632131
									12.5174	0.0624881
									12.5226	0.0619544
									12.5279	0.0614111
									12.5332	0.0609595
									12.5384	0.0605934
									12.5437	0.060298
									12.5489	0.0599793
									12.5542	0.0597021
									12.5595	0.0594442
									12.5647	0.0592121
									12.57	0.0590168
									12.5753	0.0586876
									12.5805	0.0581184
									12.5858	0.0574286
									12.5911	0.0569207
									12.5963	0.0564396
									12.6016	0.05601
									12.6069	0.0556833
									12.6121	0.0554457
									12.6174	0.0551549
									12.6227	0.0549304
									12.6279	0.0547261
									12.6332	0.0545276
									12.6385	0.0543442
									12.6437	0.0541494
									12.649	0.053705
									12.6543	0.0531227
									12.6595	0.0526297
									12.6648	0.0522204
									12.6701	0.0518531
									12.6753	0.0515842
									12.6806	0.0514273
									12.6859	0.051239
									12.6911	0.0510502
									12.6964	0.0509308
									12.7017	0.050862
									12.7069	0.0507727
									12.7122	0.0506884
									12.7175	0.0504379
									12.7227	0.0499474
									12.728	0.0494635
									12.7333	0.0491002
									12.7385	0.0488131
									12.7438	0.0485784
									12.7491	0.0484572
									12.7543	0.0483278
									12.7596	0.0482027
									12.7649	0.0481256
									12.7701	0.0480824
									12.7754	0.0480469
									12.7807	0.0480158
									12.7859	0.0478518
									12.7912	0.0474747
									12.7964	0.0470096
									12.8017	0.0466904
									12.807	0.0464154
									12.8122	0.0461869
									12.8175	0.0460742
									12.8228	0.0460277
									12.828	0.0459485
									12.8333	0.0458586
									12.8386	0.045844
									12.8438	0.0458402
									12.8491	0.0458406
									12.8544	0.0457973
									12.8596	0.0455203
									12.8649	0.0450588
									12.8702	0.0447102
									12.8754	0.0444753
									12.8807	0.0442879
									12.886	0.0441628
									12.8912	0.0441254
									12.8965	0.0440982
									12.9018	0.0440527
									12.907	0.0440409
									12.9123	0.0440702
									12.9176	0.0440637
									12.9228	0.0440572
									12.9281	0.0440136
									12.9334	0.0436217
									12.9386	0.0432795
									12.9439	0.0430472
									12.9492	0.0428946
									12.9544	0.0428055
									12.9597	0.0428093
									12.965	0.0428104
									12.9702	0.0428115
									12.9755	0.0428487
									12.9808	0.0429168
									12.986	0.0429742
									12.9913	0.0429135
									12.9966	0.0428528
									13.0018	0.0427091
									13.0071	0.0423556
									13.0124	0.0421372
									13.0176	0.0419867
									13.0229	0.0418644
									13.0282	0.0418435
									13.0334	0.041872
									13.0387	0.0418764
									13.0439	0.0419021
									13.0492	0.0419622
									13.0545	0.0420431
									13.0597	0.0420013
									13.065	0.0419596
									13.0703	0.0418546
									13.0755	0.0415264
									13.0808	0.0412467
									13.0861	0.0410679
									13.0913	0.0408963
									13.0966	0.0408309
									13.1019	0.0408472
									13.1071	0.0408553
									13.1124	0.0408635
									13.1177	0.0409105
									13.1229	0.0409565
									13.1282	0.0409586
									13.1335	0.040937
									13.1387	0.0409154
									13.144	0.0405558
									13.1493	0.0402755
									13.1545	0.0400885
									13.1598	0.0399262
									13.1651	0.0398364
									13.1703	0.0398387
									13.1756	0.0398777
									13.1809	0.0398915
									13.1861	0.0399162
									13.1914	0.0399858
									13.1967	0.0400596
									13.2019	0.039996
									13.2072	0.0399324
									13.2125	0.0397824
									13.2177	0.0394759
									13.223	0.0392129
									13.2283	0.0390276
									13.2335	0.0389293
									13.2388	0.0388921
									13.2441	0.038878
									13.2493	0.0388863
									13.2546	0.0389279
									13.2599	0.0389969
									13.2651	0.0390514
									13.2704	0.0390026
									13.2757	0.0389537
									13.2809	0.0388358
									13.2862	0.0385087
									13.2915	0.038225
									13.2967	0.0380451
									13.302	0.0379021
									13.3072	0.0378251
									13.3125	0.0378181
									13.3178	0.0377903
									13.323	0.0377774
									13.3283	0.0378274
									13.3336	0.0378623
									13.3388	0.0378287
									13.3441	0.0377951
									13.3494	0.0377144
									13.3546	0.0374109
									13.3599	0.0370747
									13.3652	0.0368182
									13.3704	0.0366294
									13.3757	0.0365631
									13.381	0.0365596
									13.3862	0.036556
									13.3915	0.0365214
									13.3968	0.0365466
									13.402	0.0365868
									13.4073	0.0365879
									13.4126	0.0365695
									13.4178	0.0365512
									13.4231	0.0362376
									13.4284	0.0358983
									13.4336	0.0356716
									13.4389	0.0354797
									13.4442	0.035341
									13.4494	0.0353168
									13.4547	0.0353151
									13.46	0.0353135
									13.4652	0.0352962
									13.4705	0.0353142
									13.4758	0.035337
									13.481	0.0352809
									13.4863	0.0352248
									13.4916	0.0350879
									13.4968	0.0347253
									13.5021	0.0344552
									13.5074	0.0342493
									13.5126	0.0340951
									13.5179	0.0339957
									13.5232	0.0339921
									13.5284	0.0339828
									13.5337	0.0339677
									13.539	0.0339776
									13.5442	0.0339895
									13.5495	0.0339483
									13.5547	0.0339071
									13.56	0.0338092
									13.5653	0.0333905
									13.5705	0.033064
									13.5758	0.032827
									13.5811	0.0326583
									13.5863	0.0325499
									13.5916	0.0325422
									13.5969	0.032531
									13.6021	0.0325026
									13.6074	0.0325408
									13.6127	0.032582
									13.6179	0.0325793
									13.6232	0.0325765
									13.6285	0.032551
									13.6337	0.0322237
									13.639	0.031853
									13.6443	0.0315914
									13.6495	0.0313942
									13.6548	0.0312398
									13.6601	0.0312115
									13.6653	0.0312013
									13.6706	0.0311361
									13.6759	0.0311233
									13.6811	0.0311597
									13.6864	0.0311643
									13.6917	0.0311627
									13.6969	0.031161
									13.7022	0.030877
									13.7075	0.0305249
									13.7127	0.0302308
									13.718	0.030014
									13.7233	0.0298468
									13.7285	0.0298065
									13.7338	0.0298123
									13.7391	0.0298182
									13.7443	0.0298264
									13.7496	0.0298579
									13.7549	0.0298874
									13.7601	0.0298566
									13.7654	0.0298257
									13.7707	0.0297413
									13.7759	0.0293641
									13.7812	0.0290448
									13.7865	0.0288163
									13.7917	0.0286536
									13.797	0.0285448
									13.8022	0.0285254
									13.8075	0.0285116
									13.8128	0.0284861
									13.818	0.0285042
									13.8233	0.0285356
									13.8286	0.0285428
									13.8338	0.0285311
									13.8391	0.0285194
									13.8444	0.0281518
									13.8496	0.0278154
									13.8549	0.0275845
									13.8602	0.0274318
									13.8654	0.0273268
									13.8707	0.0273232
									13.876	0.0273238
									13.8812	0.0273245
									13.8865	0.0273676
									13.8918	0.0274179
									13.897	0.0274726
									13.9023	0.0274454
									13.9076	0.0274182
									13.9128	0.0273173
									13.9181	0.0269723
									13.9234	0.0267098
									13.9286	0.0265794
									13.9339	0.0264909
									13.9392	0.0265083
									13.9444	0.0265328
									13.9497	0.0265573
									13.955	0.0265683
									13.9602	0.0266287
									13.9655	0.0267157
									13.9708	0.0267469
									13.976	0.0267378
									13.9813	0.0267287
									13.9866	0.026427
									13.9918	0.0261513
									13.9971	0.0259862
									14.0024	0.0258682
									14.0076	0.0258543
									14.0129	0.0259132
									14.0182	0.0259445
									14.0234	0.0259936
									14.0287	0.0260754
									14.034	0.0261776
									14.0392	0.0262299
									14.0445	0.0262544
									14.0497	0.0261172
									14.055	0.02598
									14.0603	0.0257146
									14.0655	0.0255529
									14.0708	0.0254248
									14.0761	0.0253566
									14.0813	0.0253869
									14.0866	0.0254451
									14.0919	0.025484
									14.0971	0.0255538
									14.1024	0.0256496
									14.1077	0.0257501
									14.1129	0.0257526
									14.1182	0.0256915
									14.1235	0.0256303
									14.1287	0.025334
									14.134	0.0251446
									14.1393	0.0250285
									14.1445	0.0249549
									14.1498	0.0249913
									14.1551	0.0250555
									14.1603	0.0251261
									14.1656	0.0252251
									14.1709	0.0253405
									14.1761	0.0254806
									14.1814	0.0255469
									14.1867	0.0255635
									14.1919	0.0254245
									14.1972	0.0252856
									14.2025	0.025071
									14.2077	0.0249612
									14.213	0.0248933
									14.2183	0.0248977
									14.2235	0.0250044
									14.2288	0.0250853
									14.2341	0.0251675
									14.2393	0.0253145
									14.2446	0.025457
									14.2499	0.0256051
									14.2551	0.0255694
									14.2604	0.0255336
									14.2657	0.0254357
									14.2709	0.0252023
									14.2762	0.025083
									14.2815	0.0250085
									14.2867	0.0250067
									14.292	0.0251207
									14.2973	0.0252317
									14.3025	0.0253228
									14.3078	0.025441
									14.313	0.0255883
									14.3183	0.0257383
									14.3236	0.0257727
									14.3288	0.0257498
									14.3341	0.0257268
									14.3394	0.0254743
									14.3446	0.0253266
									14.3499	0.0252372
									14.3552	0.0252172
									14.3604	0.025298
									14.3657	0.0254142
									14.371	0.0255256
									14.3762	0.0256525
									14.3815	0.0257992
									14.3868	0.0259789
									14.392	0.0260714
									14.3973	0.0261158
									14.4026	0.0260177
									14.4078	0.0259196
									14.4131	0.0257583
									14.4184	0.0256823
									14.4236	0.0256378
									14.4289	0.0257021
									14.4342	0.02582
									14.4394	0.0259299
									14.4447	0.026039
									14.45	0.0261671
									14.4552	0.0263009
									14.4605	0.0264913
									14.4658	0.0264777
									14.471	0.0264641
									14.4763	0.0263825
									14.4816	0.0261849
									14.4868	0.0261002
									14.4921	0.0260497
									14.4974	0.026081
									14.5026	0.0261863
									14.5079	0.0262959
									14.5132	0.0264335
									14.5184	0.0265976
									14.5237	0.0267322
									14.529	0.0268982
									14.5342	0.0269554
									14.5395	0.0269537
									14.5448	0.026952
									14.55	0.026745
									14.5553	0.0266343
									14.5605	0.0265899
									14.5658	0.0266016
									14.5711	0.0267009
									14.5763	0.026853
									14.5816	0.0269823
									14.5869	0.0271249
									14.5921	0.0273159
									14.5974	0.027494
									14.6027	0.0276557
									14.6079	0.0276108
									14.6132	0.0275659
									14.6185	0.0274615
									14.6237	0.0273051
									14.629	0.027215
									14.6343	0.0271755
									14.6395	0.0272477
									14.6448	0.0273875
									14.6501	0.0274927
									14.6553	0.0276045
									14.6606	0.0277633
									14.6659	0.027962
									14.6711	0.0281607
									14.6764	0.028141
									14.6817	0.0281213
									14.6869	0.0280347
									14.6922	0.027874
									14.6975	0.0278125
									14.7027	0.0277922
									14.708	0.0278358
									14.7133	0.0279554
									14.7185	0.0281011
									14.7238	0.0282519
									14.7291	0.0284238
									14.7343	0.0286041
									14.7396	0.0287763
									14.7449	0.0288351
									14.7501	0.02883
									14.7554	0.0288249
									14.7607	0.028649
									14.7659	0.0285726
									14.7712	0.0285546
									14.7765	0.0285789
									14.7817	0.0286665
									14.787	0.0288018
									14.7923	0.028936
									14.7975	0.0290771
									14.8028	0.0292268
									14.808	0.0293867
									14.8133	0.0294885
									14.8186	0.0295376
									14.8238	0.0294483
									14.8291	0.029359
									14.8344	0.029198
									14.8396	0.0291452
									14.8449	0.029166
									14.8502	0.0292529
									14.8554	0.0294213
									14.8607	0.0295658
									14.866	0.029706
									14.8712	0.0299056
									14.8765	0.0300732
									14.8818	0.0302688
									14.887	0.0302726
									14.8923	0.0302423
									14.8976	0.0302121
									14.9028	0.030059
									14.9081	0.0300129
									14.9134	0.0300091
									14.9186	0.0300911
									14.9239	0.0302622
									14.9292	0.0303952
									14.9344	0.0305176
									14.9397	0.0306904
									14.945	0.0309033
									14.9502	0.0311048
									14.9555	0.0311689
									14.9608	0.0311645
									14.966	0.03116
									14.9713	0.0309951
									14.9766	0.0308983
									14.9818	0.0308538
									14.9871	0.0308824
									14.9924	0.0309845
									14.9976	0.031133
									15.0029	0.0312583
									15.0082	0.03139
									15.0134	0.0315746
									15.0187	0.0317706
									15.024	0.0318859
									15.0292	0.0319377
									15.0345	0.03186
									15.0398	0.0317822
									15.045	0.031671
									15.0503	0.031651
									15.0556	0.0316473
									15.0608	0.0317548
									15.0661	0.0319283
									15.0713	0.0320764
									15.0766	0.0322346
									15.0819	0.0324404
									15.0871	0.0326358
									15.0924	0.0328746
									15.0977	0.0328744
									15.1029	0.0328742
									15.1082	0.0328115
									15.1135	0.0326614
									15.1187	0.0326179
									15.124	0.0326255
									15.1293	0.0326805
									15.1345	0.0328303
									15.1398	0.0329632
									15.1451	0.0330864
									15.1503	0.0332886
									15.1556	0.0334646
									15.1609	0.0336726
									15.1661	0.0337493
									15.1714	0.0337651
									15.1767	0.0336921
									15.1819	0.0336191
									15.1872	0.0335617
									15.1925	0.0335647
									15.1977	0.033651
									15.203	0.0337935
									15.2083	0.033967
									15.2135	0.034164
									15.2188	0.0343754
									15.2241	0.0345702
									15.2293	0.0347704
									15.2346	0.0349847
									15.2399	0.0349443
									15.2451	0.0349039
									15.2504	0.0348163
									15.2557	0.0347209
									15.2609	0.0346932
									15.2662	0.0346933
									15.2715	0.0347944
									15.2767	0.0349824
									15.282	0.0351511
									15.2873	0.0353128
									15.2925	0.0355024
									15.2978	0.0357149
									15.3031	0.0359489
									15.3083	0.0359541
									15.3136	0.0359283
									15.3188	0.0359026
									15.3241	0.0357668
									15.3294	0.0357097
									15.3346	0.0357264
									15.3399	0.0358388
									15.3452	0.0360192
									15.3504	0.0361884
									15.3557	0.0363557
									15.361	0.0365669
									15.3662	0.0367468
									15.3715	0.0369638
									15.3768	0.0370662
									15.382	0.0370945
									15.3873	0.0370293
									15.3926	0.0369641
									15.3978	0.0369235
									15.4031	0.036937
									15.4084	0.0369984
									15.4136	0.0371733
									15.4189	0.0373801
									15.4242	0.0375414
									15.4294	0.0377402
									15.4347	0.0379436
									15.44	0.038192
									15.4452	0.0384498
									15.4505	0.0384547
									15.4558	0.0384345
									15.461	0.0384142
									15.4663	0.038347
									15.4716	0.0383799
									15.4768	0.0384394
									15.4821	0.0385823
									15.4874	0.0387916
									15.4926	0.0389482
									15.4979	0.0391657
									15.5032	0.0394192
									15.5084	0.0396595
									15.5137	0.0398824
									15.519	0.0399423
									15.5242	0.0399355
									15.5295	0.0399288
									15.5348	0.039821
									15.54	0.0398148
									15.5453	0.0398705
									15.5506	0.0400248
									15.5558	0.0402401
									15.5611	0.0404179
									15.5663	0.0406341
									15.5716	0.0408767
									15.5769	0.0411455
									15.5821	0.0414161
									15.5874	0.0415421
									15.5927	0.0416012
									15.5979	0.0415967
									15.6032	0.0415923
									15.6085	0.0416064
									15.6137	0.0416539
									15.619	0.0417759
									15.6243	0.0419848
									15.6295	0.0422154
									15.6348	0.0424671
									15.6401	0.0427543
									15.6453	0.0430213
									15.6506	0.0432953
									15.6559	0.0436038
									15.6611	0.0436232
									15.6664	0.0436251
									15.6717	0.0436269
									15.6769	0.0436669
									15.6822	0.0437512
									15.6875	0.0438718
									15.6927	0.044081
									15.698	0.0443533
									15.7033	0.0446022
									15.7085	0.0448517
									15.7138	0.045144
									15.7191	0.0454511
									15.7243	0.0457718
									15.7296	0.0458843
									15.7349	0.0459295
									15.7401	0.0459481
									15.7454	0.0459668
									15.7507	0.0460557
									15.7559	0.0462163
									15.7612	0.0464358
									15.7665	0.0467314
									15.7717	0.0470134
									15.777	0.0473266
									15.7823	0.0476513
									15.7875	0.0479855
									15.7928	0.0483377
									15.7981	0.0486727
									15.8033	0.0487432
									15.8086	0.0487784
									15.8139	0.0488136
									15.8191	0.0489129
									15.8244	0.0490736
									15.8296	0.0493045
									15.8349	0.0496165
									15.8402	0.0499016
									15.8454	0.0502142
									15.8507	0.0505539
									15.856	0.0509451
									15.8612	0.0513129
									15.8665	0.0516998
									15.8718	0.0519708
									15.877	0.0520096
									15.8823	0.0520147
									15.8876	0.0521307
									15.8928	0.0522747
									15.8981	0.052464
									15.9034	0.0528076
									15.9086	0.053192
									15.9139	0.053538
									15.9192	0.0538581
									15.9244	0.0542428
									15.9297	0.0546396
									15.935	0.0550953
									15.9402	0.0554597
									15.9455	0.0556305
									15.9508	0.0556928
									15.956	0.0558334
									15.9613	0.0560284
									15.9666	0.0562651
									15.9718	0.0566377
									15.9771	0.0570403
									15.9824	0.0574647
									15.9876	0.05788
									15.9929	0.058348
									15.9982	0.0587896
									16.0034	0.0592856
									16.0087	0.0597325
									16.014	0.0600177
									16.0192	0.0601433
									16.0245	0.0603059
									16.0298	0.0605985
									16.035	0.0608959
									16.0403	0.0612404
									16.0456	0.0616577
									16.0508	0.0621308
									16.0561	0.0625833
									16.0614	0.0631408
									16.0666	0.0636284
									16.0719	0.0641448
									16.0771	0.0646624
									16.0824	0.065106
									16.0877	0.0653282
									16.0929	0.065533
									16.0982	0.0658354
									16.1035	0.0662281
									16.1087	0.0666594
									16.114	0.0671565
									16.1193	0.0677442
									16.1245	0.0683207
									16.1298	0.0688995
									16.1351	0.0695352
									16.1403	0.0702221
									16.1456	0.070845
									16.1509	0.0714608
									16.1561	0.0718829
									16.1614	0.0722521
									16.1667	0.0726453
									16.1719	0.0731611
									16.1772	0.0737274
									16.1825	0.0744157
									16.1877	0.0751332
									16.193	0.0758285
									16.1983	0.07663
									16.2035	0.0774868
									16.2088	0.0783134
									16.2141	0.0791527
									16.2193	0.0800571
									16.2246	0.0807605
									16.2299	0.0814152
									16.2351	0.0821034
									16.2404	0.0829452
									16.2457	0.0837647
									16.2509	0.0847744
									16.2562	0.0858165
									16.2615	0.0869555
									16.2667	0.088043
									16.272	0.0892793
									16.2773	0.0904507
									16.2825	0.0916847
									16.2878	0.0930792
									16.2931	0.0943557
									16.2983	0.0954614
									16.3036	0.096582
									16.3089	0.0979386
									16.3141	0.0993127
									16.3194	0.100902
									16.3246	0.102534
									16.3299	0.104378
									16.3352	0.106134
									16.3404	0.108095
									16.3457	0.110009
									16.351	0.112115
									16.3562	0.11422
									16.3615	0.116343
									16.3668	0.118645
									16.372	0.120957
									16.3773	0.123279
									16.3826	0.125748
									16.3878	0.12858
									16.3931	0.131321
									16.3984	0.134449
									16.4036	0.137434
									16.4089	0.140815
									16.4142	0.144034
									16.4194	0.14767
									16.4247	0.15116
									16.43	0.155079
									16.4352	0.158919
									16.4405	0.163188
									16.4458	0.167253
									16.451	0.171485
									16.4563	0.176343
									16.4616	0.181368
									16.4668	0.18627
									16.4721	0.191246
									16.4774	0.196841
									16.4826	0.202138
									16.4879	0.208054
									16.4932	0.214143
									16.4984	0.220929
									16.5037	0.227184
									16.509	0.234295
									16.5142	0.241463
									16.5195	0.249369
									16.5248	0.256993
									16.53	0.264386
									16.5353	0.272518
									16.5406	0.281127
									16.5458	0.289468
									16.5511	0.29748
									16.5564	0.306417
									16.5616	0.314846
									16.5669	0.324264
									16.5722	0.333209
									16.5774	0.343695
									16.5827	0.353712
									16.5879	0.364397
									16.5932	0.37433
									16.5985	0.3852
									16.6037	0.395578
									16.609	0.406833
									16.6143	0.418062
									16.6195	0.429578
									16.6248	0.441468
									16.6301	0.453166
									16.6353	0.464466
									16.6406	0.476098
									16.6459	0.489097
									16.6511	0.501083
									16.6564	0.51396
									16.6617	0.526084
									16.6669	0.539189
									16.6722	0.551224
									16.6775	0.563974
									16.6827	0.576225
									16.688	0.589125
									16.6933	0.601287
									16.6985	0.613274
									16.7038	0.626395
									16.7091	0.639324
									16.7143	0.65184
									16.7196	0.664438
									16.7249	0.677952
									16.7301	0.690099
									16.7354	0.703263
									16.7407	0.715195
									16.7459	0.728116
									16.7512	0.739899
									16.7565	0.752331
									16.7617	0.763524
									16.767	0.775316
									16.7723	0.786384
									16.7775	0.797837
									16.7828	0.808703
									16.7881	0.819419
									16.7933	0.830886
									16.7986	0.841644
									16.8039	0.851436
									16.8091	0.861128
									16.8144	0.870893
									16.8197	0.879845
									16.8249	0.889035
									16.8302	0.897475
									16.8354	0.906009
									16.8407	0.913862
									16.846	0.921807
									16.8512	0.929081
									16.8565	0.936462
									16.8618	0.943128
									16.867	0.949247
									16.8723	0.955492
									16.8776	0.961213
									16.8828	0.966328
									16.8881	0.97098
									16.8934	0.975598
									16.8986	0.979662
									16.9039	0.983629
									16.9092	0.986942
									16.9144	0.990151
									16.9197	0.992873
									16.925	0.995225
									16.9302	0.996926
									16.9355	0.998269
									16.9408	0.999242
									16.946	0.999899
									16.9513	1
									16.9566	0.999994
									16.9618	0.999988
									16.9671	0.999367
									16.9724	0.99855
									16.9776	0.997407
									16.9829	0.995839
									16.9882	0.994138
									16.9934	0.99195
									16.9987	0.988831
									17.004	0.985269
									17.0092	0.981755
									17.0145	0.978121
									17.0198	0.973946
									17.025	0.969714
									17.0303	0.96549
									17.0356	0.961071
									17.0408	0.956125
									17.0461	0.9514
									17.0514	0.945991
									17.0566	0.940852
									17.0619	0.934943
									17.0672	0.928625
									17.0724	0.921349
									17.0777	0.914629
									17.0829	0.907425
									17.0882	0.900444
									17.0935	0.893109
									17.0987	0.88622
									17.104	0.879252
									17.1093	0.871546
									17.1145	0.863967
									17.1198	0.856709
									17.1251	0.849452
									17.1303	0.841327
									17.1356	0.833312
									17.1409	0.824033
									17.1461	0.815242
									17.1514	0.806084
									17.1567	0.797636
									17.1619	0.789303
									17.1672	0.780414
									17.1725	0.771699
									17.1777	0.763389
									17.183	0.75533
									17.1883	0.746475
									17.1935	0.738305
									17.1988	0.728991
									17.2041	0.720054
									17.2093	0.710042
									17.2146	0.700705
									17.2199	0.690917
									17.2251	0.682049
									17.2304	0.672597
									17.2357	0.663972
									17.2409	0.654929
									17.2462	0.646543
									17.2515	0.637694
									17.2567	0.629414
									17.262	0.62067
									17.2673	0.612426
									17.2725	0.604207
									17.2778	0.594606
									17.2831	0.58487
									17.2883	0.575927
									17.2936	0.567415
									17.2989	0.558382
									17.3041	0.550343
									17.3094	0.542019
									17.3147	0.5341
									17.3199	0.525763
									17.3252	0.51823
									17.3305	0.510174
									17.3357	0.502679
									17.341	0.494786
									17.3462	0.486891
									17.3515	0.478546
									17.3568	0.469489
									17.362	0.461218
									17.3673	0.453681
									17.3726	0.446498
									17.3778	0.439048
									17.3831	0.432291
									17.3884	0.424726
									17.3936	0.41724
									17.3989	0.409586
									17.4042	0.403124
									17.4094	0.396308
									17.4147	0.389793
									17.42	0.38235
									17.4252	0.375313
									17.4305	0.368262
									17.4358	0.361786
									17.441	0.355605
									17.4463	0.348966
									17.4516	0.342544
									17.4568	0.336755
									17.4621	0.331265
									17.4674	0.325424
									17.4726	0.320122
									17.4779	0.314532
									17.4832	0.309135
									17.4884	0.302961
									17.4937	0.297189
									17.499	0.291297
									17.5042	0.285943
									17.5095	0.280206
									17.5148	0.274912
									17.52	0.270162
									17.5253	0.265154
									17.5306	0.260347
									17.5358	0.255944
									17.5411	0.251399
									17.5464	0.24639
									17.5516	0.241897
									17.5569	0.236608
									17.5622	0.231635
									17.5674	0.226779
									17.5727	0.222469
									17.578	0.217717
									17.5832	0.213397
									17.5885	0.209279
									17.5937	0.205587
									17.599	0.201757
									17.6043	0.198271
									17.6095	0.194942
									17.6148	0.191376
									17.6201	0.18794
									17.6253	0.184511
									17.6306	0.180784
									17.6359	0.176786
									17.6411	0.173364
									17.6464	0.16985
									17.6517	0.166671
									17.6569	0.163523
									17.6622	0.160742
									17.6675	0.157764
									17.6727	0.155043
									17.678	0.152285
									17.6833	0.149694
									17.6885	0.147212
									17.6938	0.144427
									17.6991	0.141603
									17.7043	0.138446
									17.7096	0.135747
									17.7149	0.132984
									17.7201	0.130509
									17.7254	0.128046
									17.7307	0.12594
									17.7359	0.123674
									17.7412	0.121563
									17.7465	0.119441
									17.7517	0.117516
									17.757	0.115513
									17.7623	0.113599
									17.7675	0.111293
									17.7728	0.108948
									17.7781	0.106763
									17.7833	0.104536
									17.7886	0.102485
									17.7939	0.100711
									17.7991	0.0990982
									17.8044	0.0973572
									17.8097	0.0957665
									17.8149	0.0941596
									17.8202	0.0926967
									17.8255	0.0911962
									17.8307	0.0898255
									17.836	0.0881314
									17.8412	0.0863179
									17.8465	0.0844206
									17.8518	0.08278
									17.857	0.0812661
									17.8623	0.0797118
									17.8676	0.0784827
									17.8728	0.0772298
									17.8781	0.0760355
									17.8834	0.0747719
									17.8886	0.0736865
									17.8939	0.0725606
									17.8992	0.0715622
									17.9044	0.070367
									17.9097	0.0689913
									17.915	0.0674306
									17.9202	0.0661616
									17.9255	0.0649144
									17.9308	0.0637748
									17.936	0.0627185
									17.9413	0.0618171
									17.9466	0.060904
									17.9518	0.0599546
									17.9571	0.0591142
									17.9624	0.0583107
									17.9676	0.0575599
									17.9729	0.0566997
									17.9782	0.0556882
									17.9834	0.0544311
									17.9887	0.0533315
									17.994	0.0523355
									17.9992	0.0514675
									18.0045	0.0506508
									18.0098	0.0499846
									18.015	0.0492653
									18.0203	0.0486029
									18.0256	0.0480267
									18.0308	0.0474209
									18.0361	0.0468683
									18.0414	0.0462655
									18.0466	0.0455705
									18.0519	0.044597
									18.0572	0.043685
									18.0624	0.042836
									18.0677	0.0420991
									18.073	0.0413805
									18.0782	0.0408366
									18.0835	0.0403231
[truncated: 161 more rows]

## Sheet: delta1206-1220
volume (mL)	Molar Mass 1	volume (mL)	Molar Mass 2	volume (mL)	Molar Mass 3	volume (mL)	Molar Mass 4		volume (mL)	RI
8.55186	391639	9.69873	184220	10.349	135001	16.1448	26034.4		-0.315822	0.000206004
8.55698	389868	9.70385	183537	10.3541	134800	16.1499	26057.1		-0.310556	0.000195448
8.5621	388689	9.70897	182975	10.3592	134565	16.155	25980.5		-0.30529	0.00018377
8.56722	387209	9.71409	182419	10.3643	134360	16.1601	25862.3		-0.300024	0.000169108
8.57234	385574	9.71921	181795	10.3695	134134	16.1653	25764.4		-0.294758	0.000147029
8.57746	383372	9.72433	181175	10.3746	133933	16.1704	25661.1		-0.289492	0.000124549
8.58258	381983	9.72945	180636	10.3797	133680	16.1755	25578.1		-0.284226	0.000114491
8.5877	380659	9.73457	180088	10.3848	133483	16.1806	25471.6		-0.27896	0.000105166
8.59282	379542	9.73969	179459	10.3899	133287	16.1857	25381.9		-0.273694	9.56726e-05
8.59794	377882	9.74481	178805	10.3951	133141	16.1909	25322.3		-0.268428	9.57583e-05
8.60306	376206	9.74993	178203	10.4002	132951	16.196	25238.9		-0.263162	9.5844e-05
8.60818	374743	9.75505	177666	10.4053	132778	16.2011	25136		-0.257896	9.22838e-05
8.6133	372871	9.76017	177111	10.4104	132487	16.2062	25061.3		-0.25263	8.73552e-05
8.61842	371290	9.76529	176577	10.4155	132216	16.2113	25018.2		-0.247364	8.28102e-05
8.62354	369651	9.77041	176092	10.4207	132066	16.2165	24972.9		-0.242098	7.50005e-05
8.62866	367980	9.77553	175690	10.4258	131874	16.2216	24894.9		-0.236832	7.4405e-05
8.63378	366650	9.78065	175205	10.4309	131663	16.2267	24816.2		-0.231566	6.9312e-05
8.6389	365607	9.78577	174630	10.436	131461	16.2318	24722.9		-0.2263	5.6193e-05
8.64402	364445	9.79089	174056	10.4411	131292	16.2369	24628		-0.221034	4.52206e-05
8.64914	362855	9.79601	173521	10.4463	131120	16.2421	24522.9		-0.215768	4.00459e-05
8.65426	361321	9.80113	172999	10.4514	130981	16.2472	24435.2		-0.210502	3.94114e-05
8.65938	359984	9.80625	172532	10.4565	130867	16.2523	24332		-0.205236	3.23579e-05
8.6645	359032	9.81137	171947	10.4616	130743	16.2574	24242.3		-0.19997	3.32247e-05
8.66962	357793	9.81649	171421	10.4667	130575	16.2625	24136.9		-0.194704	3.30667e-05
8.67474	355837	9.82161	170913	10.4718	130384	16.2677	24062.2		-0.189438	2.55474e-05
8.67986	353583	9.82673	170368	10.477	130200	16.2728	23994.8		-0.184172	2.00974e-05
8.68498	351605	9.83185	169907	10.4821	130014	16.2779	23901.9		-0.178906	1.51937e-05
8.6901	350124	9.83697	169408	10.4872	129881	16.283	23823.2		-0.17364	1.03603e-05
8.69522	348519	9.84209	168890	10.4923	129737	16.2881	23749.4		-0.168374	1.24649e-05
8.70034	347049	9.84721	168410	10.4974	129582	16.2933	23672.9		-0.163108	1.32351e-05
8.70546	345323	9.85233	168180	10.5026	129388	16.2984	23573.9		-0.157842	1.40053e-05
8.71058	344132	9.85745	168071	10.5077	129154	16.3035	23504.8		-0.152576	8.20493e-06
8.7157	342562	9.86257	167838	10.5128	128921	16.3086	23411.8		-0.14731	7.52042e-06
8.72082	341401	9.86769	167397	10.5179	128703	16.3137	23345.2		-0.142044	1.7489e-05
8.72594	339891	9.87281	166993	10.523	128502	16.3189	23267.2		-0.136778	2.27002e-05
8.73106	338669	9.87793	166470	10.5282	128323	16.324	23194.2		-0.131512	3.05456e-05
8.73618	337121	9.88305	165929	10.5333	128155	16.3291	23110.8		-0.126246	4.58365e-05
8.7413	335870	9.88817	165356	10.5384	127969	16.3342	23046.4		-0.12098	5.41132e-05
8.74642	334277	9.89329	164845	10.5435	127807	16.3393	22975		-0.115714	6.14317e-05
8.75154	332972	9.89841	164383	10.5486	127634	16.3445	22911.4		-0.110448	6.93198e-05
8.75666	331396	9.90353	163896	10.5538	127488	16.3496	22846.6		-0.105182	7.75438e-05
8.76178	330102	9.90865	163423	10.5589	127316	16.3547	22783.6		-0.0999164	8.47915e-05
8.7669	328876	9.91377	163003	10.564	127162	16.3598	22723.3		-0.0946504	9.46581e-05
8.77202	327747	9.91889	162652	10.5691	126973	16.3649	22657.2		-0.0893845	9.93961e-05
8.77714	326736	9.92401	162303	10.5742	126795	16.3701	22586.9		-0.0841185	0.000101823
8.78226	325480	9.92913	161818	10.5794	126595	16.3752	22519.9		-0.0788525	0.000104249
8.78738	324120	9.93425	161291	10.5845	126417	16.3803	22459.6		-0.0735865	0.000105799
8.7925	323005	9.93937	160762	10.5896	126247	16.3854	22399.1		-0.0683205	0.000116169
8.79762	321958	9.94449	160256	10.5947	126067	16.3905	22335.9		-0.0630545	0.000122046
8.80274	320665	9.94961	159729	10.5998	125907	16.3957	22272.6		-0.0577886	0.000129623
8.80786	319482	9.95473	159104	10.605	125770	16.4008	22212.5		-0.0525226	0.000131993
8.81298	318285			10.6101	125627	16.4059	22156.2		-0.0472566	0.000134362
8.8181	317013			10.6152	125461	16.411	22100.2		-0.0419906	0.000134588
8.82322	315718			10.6203	125282	16.4161	22048.9		-0.0367246	0.000134815
8.82834	314551			10.6254	125091	16.4213	22002.1		-0.0314586	0.000134054
8.83346	313515			10.6306	124907	16.4264	21958.8		-0.0261926	0.00013419
8.83858	312357			10.6357	124719	16.4315	21905.6		-0.0209267	0.000134326
8.8437	311163			10.6408	124566	16.4366	21851.8		-0.0156607	0.000127197
8.84882	310159			10.6459	124418	16.4417	21808.5		-0.0103947	0.000118864
8.85394	309159			10.651	124278	16.4469	21769.7		-0.00512871	0.000109101
8.85906	308098			10.6562	124124	16.452	21717.6		0.000137272	0.000103614
8.86418	306994			10.6613	123958	16.4571	21660.3		0.00540326	0.000102849
8.8693	305930			10.6664	123769	16.4622	21615.9		0.0106692	0.000102716
8.87442	304690			10.6715	123564	16.4673	21580.3		0.0159352	0.000102583
8.87954	303612			10.6766	123361	16.4725	21532.2		0.0212012	0.000100774
8.88466	302498			10.6818	123177	16.4776	21487		0.0264672	9.90124e-05
8.88978	301439			10.6869	123006	16.4827	21437		0.0317332	9.76339e-05
8.8949	300329			10.692	122815	16.4878	21394.6		0.0369992	9.62554e-05
8.90002	299379			10.6971	122627	16.4929	21346.1		0.0422651	9.34226e-05
8.90514	298330			10.7022	122438	16.4981	21307.2		0.0475311	9.42172e-05
8.91026	297339			10.7074	122226	16.5032	21267.1		0.0527971	9.50119e-05
8.91538	296303			10.7125	122025	16.5083	21233.7		0.0580631	8.55144e-05
8.9205	295383			10.7176	121835	16.5134	21196.7		0.0633291	7.37945e-05
8.92562	294409			10.7227	121650	16.5185	21158.1		0.0685951	7.1488e-05
8.93074	293515			10.7278	121450	16.5237	21118.9		0.0738611	7.18739e-05
8.93586	292614			10.733	121239	16.5288	21079.5		0.079127	7.72383e-05
8.94098	291726			10.7381	121035	16.5339	21044.6		0.084393	7.86297e-05
8.9461	290774			10.7432	120853	16.539	21011.9		0.089659	7.86389e-05
8.95122	289761			10.7483	120656	16.5441	20971.8		0.094925	7.8648e-05
8.95634	288750			10.7534	120457	16.5493	20929.6		0.100191	7.61904e-05
8.96146	287751			10.7586	120294	16.5544	20891.6		0.105457	7.23822e-05
8.96658	286793			10.7637	120129	16.5595	20853.9		0.110723	6.30693e-05
8.9717	285824			10.7688	119955	16.5646	20822.2		0.115989	5.64967e-05
8.97682	284892			10.7739	119766	16.5697	20791.1		0.121255	4.94071e-05
8.98194	283986			10.779	119568	16.5749	20765.1		0.126521	4.00814e-05
8.98706	283096			10.7842	119403	16.58	20732.6		0.131787	2.80511e-05
8.99218	282233			10.7893	119263	16.5851	20703.8		0.137053	1.94759e-05
8.9973	281343			10.7944	119118	16.5902	20671.3		0.142319	1.95843e-05
9.00242	280436			10.7995	118986	16.5953	20640.1		0.147585	2.405e-05
9.00754	279597			10.8046	118765	16.6005	20626.3		0.152851	2.80988e-05
9.01266	278737			10.8098	118533	16.6056	20610.5		0.158117	2.87759e-05
9.01778	277841			10.8149	118321	16.6107	20592.6		0.163383	2.94531e-05
9.0229	276964			10.82	118128	16.6158	20582.7		0.168649	2.97294e-05
9.02802	276129			10.8251	117936	16.6209	20566.7		0.173915	2.70284e-05
9.03314	275234			10.8302	117765	16.6261	20540.2		0.179181	2.64729e-05
9.03826	274316			10.8354	117589	16.6312	20505		0.184447	2.78479e-05
9.04338	273372			10.8405	117417	16.6363	20489.9		0.189713	2.84206e-05
9.0485	272522			10.8456	117196	16.6414	20454.4		0.194979	2.89933e-05
9.05362	271718			10.8507	116990	16.6465	20438.6		0.200245	2.49029e-05
9.05874	270877			10.8558	116817	16.6517	20419.5		0.205511	2.23372e-05
9.06386	270058			10.861	116564	16.6568	20421.7		0.210777	2.08544e-05
9.06898	269239			10.8661	116279	16.6619	20404.8		0.216043	2.12521e-05
9.0741	268473			10.8712	116041	16.667	20382.2		0.221309	2.76386e-05
9.07922	267708			10.8763	115865	16.6721	20343.7		0.226575	2.95687e-05
9.08434	266982			10.8814	115741	16.6773	20327.3		0.231841	3.07375e-05
9.08946	266195			10.8866	115555	16.6824	20295.3		0.237107	3.03105e-05
9.09458	265387			10.8917	115322	16.6875	20278.1		0.242373	2.98836e-05
9.0997	264539			10.8968	115101	16.6926	20243.8		0.247639	2.81809e-05
9.10482	263809			10.9019	114862	16.6977	20204.5		0.252905	2.85236e-05
9.10994	263030			10.907	114609	16.7029	20176.2		0.258171	2.88662e-05
9.11506	262153			10.9122	114410	16.708	20155		0.263436	2.74951e-05
9.12018	261370			10.9173	114201	16.7131	20129.9		0.268702	1.86309e-05
9.1253	260623			10.9224	113946	16.7182	20098.2		0.273968	1.19384e-05
9.13042	259816					16.7233	20099.9		0.279234	1.11315e-05
9.13554	258986					16.7285	20085.6		0.2845	1.24324e-05
9.14066	258261					16.7336	20061.2		0.289766	1.91973e-05
9.14578	257513					16.7387	20020.8		0.295032	2.39256e-05
9.1509	256758					16.7438	19998.9		0.300298	2.59881e-05
9.15602	255958					16.7489	19978.1		0.305564	2.51683e-05
9.16114	255210					16.7541	19953.7		0.31083	2.43485e-05
9.16626	254418					16.7592	19935.1		0.316096	2.48683e-05
9.17138	253567					16.7643	19764.5		0.321362	2.77313e-05
9.1765	252812								0.326628	2.81099e-05
9.18162	252087								0.331894	2.84884e-05
9.18674	251294								0.33716	2.60538e-05
9.19186	250517								0.342426	2.36926e-05
9.19698	249769								0.347692	2.46216e-05
9.2021	249032								0.352958	2.55507e-05
9.20722	248320								0.358224	2.81276e-05
9.21234	247619								0.36349	4.06366e-05
9.21746	246894								0.368756	4.42659e-05
9.22258	246183								0.374022	4.50439e-05
9.2277	245502								0.379288	4.58219e-05
9.23282	244855								0.384554	4.55304e-05
9.23794	244162								0.38982	4.34286e-05
9.24306	243430								0.395086	4.37202e-05
9.24818	242631								0.400352	4.40118e-05
9.2533	241839								0.405618	4.11705e-05
9.25842	241043								0.410884	3.05086e-05
9.26354	240329								0.41615	3.05996e-05
9.26866	239626								0.421416	3.43245e-05
9.27378	239024								0.426682	3.58169e-05
9.2789	238354								0.431948	4.24265e-05
9.28402	237704								0.437214	4.5987e-05
9.28914	237096								0.44248	4.68806e-05
9.29426	236506								0.447746	4.77741e-05
9.29938	235874								0.453012	4.80687e-05
9.3045	235176								0.458278	4.59815e-05
9.30962	234553								0.463544	4.72289e-05
9.31474	233873								0.46881	4.61432e-05
9.31986	233181								0.474076	4.50575e-05
9.32498	232359								0.479342	3.14977e-05
9.3301	231591								0.484608	2.60851e-05
9.33522	230837								0.489874	2.4923e-05
9.34034	230033								0.49514	2.37609e-05
9.34546	229280								0.500406	2.30895e-05
9.35058	228605								0.505672	2.37807e-05
9.3557	227990								0.510938	2.44718e-05
9.36082	227354								0.516204	2.49251e-05
9.36594	226708								0.52147	2.28833e-05
9.37106	225937								0.526736	2.05718e-05
9.37618	225183								0.532002	2.12142e-05
9.3813	224445								0.537268	2.17566e-05
9.38642	223709								0.542534	2.22989e-05
9.39154	222950								0.5478	2.10158e-05
9.39666	222151								0.553066	2.16985e-05
9.40178	221439								0.558332	2.30711e-05
									0.563598	2.54257e-05
									0.568864	3.43843e-05
									0.57413	4.01774e-05
									0.579396	4.3102e-05
									0.584662	4.53945e-05
									0.589928	4.67726e-05
									0.595194	4.74613e-05
									0.600459	4.81499e-05
									0.605725	4.8346e-05
									0.610991	4.8542e-05
									0.616257	4.5393e-05
									0.621523	3.55587e-05
									0.626789	3.91354e-05
									0.632055	4.22578e-05
									0.637321	4.38149e-05
									0.642587	4.92187e-05
									0.647853	5.22529e-05
									0.653119	5.52871e-05
									0.658385	5.66483e-05
									0.663651	5.74888e-05
									0.668917	5.83294e-05
									0.674183	6.22306e-05
									0.679449	6.47763e-05
									0.684715	6.48563e-05
									0.689981	6.49364e-05
									0.695247	6.23668e-05
									0.700513	6.53071e-05
									0.705779	7.69848e-05
									0.711045	8.82381e-05
									0.716311	9.91763e-05
									0.721577	0.000102201
									0.726843	0.00010303
									0.732109	0.00010386
									0.737375	0.000103868
									0.742641	0.000103466
									0.747907	0.000104237
									0.753173	0.000105007
									0.758439	9.61274e-05
									0.763705	8.71843e-05
									0.768971	8.27495e-05
									0.774237	8.7289e-05
									0.779503	9.65666e-05
									0.784769	0.000104852
									0.790035	0.000108632
									0.795301	0.000111336
									0.800567	0.000112266
									0.805833	0.000113197
									0.811099	0.000113794
									0.816365	0.000114544
									0.821631	0.000115295
									0.826897	0.000112863
									0.832163	0.00010817
									0.837429	0.000107533
									0.842695	0.000105262
									0.847961	0.00011035
									0.853227	0.000120816
									0.858493	0.000128072
									0.863759	0.000127796
									0.869025	0.000127521
									0.874291	0.000125854
									0.879557	0.000125387
									0.884823	0.00012538
									0.890089	0.000125373
									0.895355	0.00011745
									0.900621	0.000109092
									0.905887	0.000103555
									0.911153	0.000102372
									0.916419	9.96525e-05
									0.921685	0.000100456
									0.926951	0.000107441
									0.932217	0.000107818
									0.937483	0.000108196
									0.942748	0.000107654
									0.948014	0.000106494
									0.95328	0.000109127
									0.958546	0.000110223
									0.963812	0.000106236
									0.969078	0.00010225
									0.974344	9.83332e-05
									0.97961	0.000100611
									0.984876	0.000104189
									0.990142	0.000110523
									0.995408	0.000114639
									1.00067	0.000116138
									1.00594	0.000116164
									1.01121	0.00011619
									1.01647	0.000115859
									1.02174	0.000116788
									1.027	0.000117898
									1.03227	0.000118196
									1.03754	0.000118495
									1.0428	0.000115224
									1.04807	0.000116521
									1.05333	0.000117818
									1.0586	0.000119296
									1.06387	0.000127707
									1.06913	0.000130693
									1.0744	0.000132466
									1.07966	0.000133109
									1.08493	0.000133753
									1.0902	0.000133266
									1.09546	0.00013291
									1.10073	0.000132554
									1.10599	0.000129729
									1.11126	0.000114217
									1.11653	0.000111495
									1.12179	0.000111966
									1.12706	0.000106648
									1.13232	0.000108508
									1.13759	0.000109514
									1.14286	0.00011052
									1.14812	0.000105515
									1.15339	0.000105647
									1.15865	0.000101954
									1.16392	9.89148e-05
									1.16919	9.58137e-05
									1.17445	9.27126e-05
									1.17972	7.92579e-05
									1.18498	7.22611e-05
									1.19025	6.75332e-05
									1.19552	6.14704e-05
									1.20078	6.13327e-05
									1.20605	6.20778e-05
									1.21131	6.28229e-05
									1.21658	6.22459e-05
									1.22185	5.65294e-05
									1.22711	4.99753e-05
									1.23238	4.73985e-05
									1.23764	4.74206e-05
									1.24291	4.71667e-05
									1.24818	4.09932e-05
									1.25344	3.14837e-05
									1.25871	2.70269e-05
									1.26397	2.61487e-05
									1.26924	2.52704e-05
									1.27451	2.41956e-05
									1.27977	2.24782e-05
									1.28504	1.78113e-05
									1.2903	1.015e-05
									1.29557	-6.08551e-07
									1.30084	-5.14939e-06
									1.3061	-4.98446e-06
									1.31137	-5.9438e-06
									1.31663	-6.90315e-06
									1.3219	-2.0571e-05
									1.32717	-2.93142e-05
									1.33243	-2.92685e-05
									1.3377	-2.80979e-05
									1.34296	-2.69398e-05
									1.34823	-2.74544e-05
									1.3535	-2.79689e-05
									1.35876	-3.2721e-05
									1.36403	-3.71298e-05
									1.36929	-4.7362e-05
									1.37456	-5.1959e-05
									1.37983	-5.30155e-05
									1.38509	-6.27953e-05
									1.39036	-7.69384e-05
									1.39562	-8.53951e-05
									1.40089	-9.08399e-05
									1.40616	-9.1044e-05
									1.41142	-9.09802e-05
									1.41669	-9.09164e-05
									1.42195	-9.33918e-05
									1.42722	-9.58418e-05
									1.43249	-9.7131e-05
									1.43775	-9.84202e-05
									1.44302	-0.000101567
									1.44828	-0.000103254
									1.45355	-0.000104689
									1.45881	-0.000113995
									1.46408	-0.000124026
									1.46935	-0.000130761
									1.47461	-0.000129677
									1.47988	-0.000127817
									1.48514	-0.000126632
									1.49041	-0.000126323
									1.49568	-0.000126014
									1.50094	-0.000130858
									1.50621	-0.000129845
									1.51147	-0.000131966
									1.51674	-0.000133637
									1.52201	-0.000135066
									1.52727	-0.00014046
									1.53254	-0.000146687
									1.5378	-0.000149854
									1.54307	-0.000150818
									1.54834	-0.000150266
									1.5536	-0.000142675
									1.55887	-0.00013972
									1.56413	-0.000138327
									1.5694	-0.000137812
									1.57467	-0.000137297
									1.57993	-0.000135613
									1.5852	-0.000134641
									1.59046	-0.000133669
									1.59573	-0.000138132
									1.601	-0.000142236
									1.60626	-0.000148605
									1.61153	-0.000148497
									1.61679	-0.00014171
									1.62206	-0.000136615
									1.62733	-0.000134009
									1.63259	-0.000133094
									1.63786	-0.000132178
									1.64312	-0.000131997
									1.64839	-0.000131045
									1.65366	-0.000130093
									1.65892	-0.000129623
									1.66419	-0.000133383
									1.66945	-0.000137832
									1.67472	-0.000141298
									1.67999	-0.000142629
									1.68525	-0.000140872
									1.69052	-0.000137441
									1.69578	-0.000132543
									1.70105	-0.000130484
									1.70632	-0.000131466
									1.71158	-0.000132448
									1.71685	-0.00013099
									1.72211	-0.000128909
									1.72738	-0.000123648
									1.73265	-0.000122345
									1.73791	-0.000121484
									1.74318	-0.000120624
									1.74844	-0.000116776
									1.75371	-0.000115075
									1.75898	-0.00011053
									1.76424	-9.76908e-05
									1.76951	-9.26123e-05
									1.77477	-8.98233e-05
									1.78004	-8.89183e-05
									1.78531	-8.80134e-05
									1.79057	-8.34864e-05
									1.79584	-7.68861e-05
									1.8011	-7.73721e-05
									1.80637	-7.78581e-05
									1.81164	-8.16607e-05
									1.8169	-8.5222e-05
									1.82217	-8.3642e-05
									1.82743	-8.20621e-05
									1.8327	-7.98051e-05
									1.83797	-6.6888e-05
									1.84323	-6.62384e-05
									1.8485	-6.55888e-05
									1.85376	-6.6958e-05
									1.85903	-6.41954e-05
									1.8643	-6.09055e-05
									1.86956	-5.99772e-05
									1.87483	-5.90489e-05
									1.88009	-6.49016e-05
									1.88536	-6.87203e-05
									1.89063	-6.99165e-05
									1.89589	-6.86954e-05
									1.90116	-6.31374e-05
									1.90642	-5.89673e-05
									1.91169	-5.72539e-05
									1.91696	-5.75337e-05
									1.92222	-5.78134e-05
									1.92749	-6.08689e-05
									1.93275	-6.24426e-05
									1.93802	-6.12837e-05
									1.94329	-6.10928e-05
									1.94855	-6.09018e-05
									1.95382	-6.88168e-05
									1.95908	-6.98555e-05
									1.96435	-6.75942e-05
									1.96962	-6.5333e-05
									1.97488	-5.99793e-05
									1.98015	-5.16362e-05
									1.98541	-4.8528e-05
									1.99068	-4.65273e-05
									1.99595	-4.45266e-05
									2.00121	-4.32672e-05
									2.00648	-3.3226e-05
									2.01174	-3.05389e-05
									2.01701	-2.94382e-05
									2.02228	-2.98545e-05
									2.02754	-3.02708e-05
									2.03281	-2.33701e-05
									2.03807	-1.6687e-05
									2.04334	-4.69679e-06
									2.04861	7.99124e-06
									2.05387	1.06487e-05
									2.05914	1.17082e-05
									2.0644	1.27678e-05
									2.06967	1.35351e-05
									2.07494	1.1364e-05
									2.0802	1.18381e-05
									2.08547	1.23122e-05
									2.09073	1.46356e-06
									2.096	-7.48833e-06
									2.10127	-1.33645e-05
									2.10653	-1.46951e-05
									2.1118	-1.31774e-05
									2.11706	-6.82336e-06
									2.12233	-5.49354e-06
									2.12759	-5.06681e-06
									2.13286	-4.64008e-06
									2.13813	-4.98207e-06
									2.14339	-8.67614e-06
									2.14866	-7.19167e-06
									2.15392	-5.95488e-06
									2.15919	-6.28677e-06
									2.16446	-6.61866e-06
									2.16972	-7.86007e-06
									2.17499	-4.69505e-06
									2.18025	5.91934e-06
									2.18552	1.70426e-05
									2.19079	2.00792e-05
									2.19605	2.13822e-05
									2.20132	2.26852e-05
									2.20658	2.39918e-05
									2.21185	2.50075e-05
									2.21712	2.60232e-05
									2.22238	2.59353e-05
									2.22765	2.58474e-05
									2.23291	1.4911e-05
									2.23818	1.21688e-05
									2.24345	1.39471e-05
									2.24871	1.50943e-05
									2.25398	1.81618e-05
									2.25924	2.0145e-05
									2.26451	1.69557e-05
									2.26978	1.37664e-05
									2.27504	1.07059e-05
									2.28031	8.55321e-06
									2.28557	6.18549e-06
									2.29084	4.17189e-06
									2.29611	-1.6489e-06
									2.30137	-9.08901e-06
									2.30664	-1.42636e-05
									2.3119	-2.02483e-05
									2.31717	-2.41065e-05
									2.32244	-2.3221e-05
									2.3277	-2.29296e-05
									2.33297	-2.38875e-05
									2.33823	-2.97191e-05
									2.3435	-3.49565e-05
									2.34877	-3.42535e-05
									2.35403	-3.35506e-05
									2.3593	-3.36785e-05
									2.36456	-3.89524e-05
									2.36983	-5.07041e-05
									2.3751	-5.81516e-05
									2.38036	-7.07989e-05
									2.38563	-7.53138e-05
									2.39089	-7.91709e-05
									2.39616	-7.96133e-05
									2.40143	-8.2438e-05
									2.40669	-8.52626e-05
									2.41196	-9.62008e-05
									2.41722	-0.000101536
									2.42249	-0.000105051
									2.42776	-0.000111562
									2.43302	-0.000116635
									2.43829	-0.000129368
									2.44355	-0.000143349
									2.44882	-0.000151769
									2.45409	-0.000157536
									2.45935	-0.000160967
									2.46462	-0.000157662
									2.46988	-0.000154719
									2.47515	-0.000153742
									2.48042	-0.000152765
									2.48568	-0.00015632
									2.49095	-0.000157111
									2.49621	-0.000156216
									2.50148	-0.000155322
									2.50675	-0.00016285
									2.51201	-0.000174769
									2.51728	-0.000185036
									2.52254	-0.000192275
									2.52781	-0.000198636
									2.53308	-0.000197899
									2.53834	-0.000200331
									2.54361	-0.000202763
									2.54887	-0.000210726
									2.55414	-0.000213946
									2.55941	-0.000223215
									2.56467	-0.000231089
									2.56994	-0.000230956
									2.5752	-0.000230823
									2.58047	-0.000235037
									2.58574	-0.000241189
									2.591	-0.000247607
									2.59627	-0.000248498
									2.60153	-0.00024948
									2.6068	-0.000248782
									2.61207	-0.000248085
									2.61733	-0.000248342
									2.6226	-0.000253161
									2.62786	-0.000257096
									2.63313	-0.000265151
									2.6384	-0.00026694
									2.64366	-0.000272702
									2.64893	-0.000278464
									2.65419	-0.000291842
									2.65946	-0.000301441
									2.66473	-0.000305834
									2.66999	-0.000310195
									2.67526	-0.000311795
									2.68052	-0.000311465
									2.68579	-0.000311134
									2.69106	-0.000312436
									2.69632	-0.000318413
									2.70159	-0.000325687
									2.70685	-0.000324835
									2.71212	-0.000327003
									2.71739	-0.00032917
									2.72265	-0.000334855
									2.72792	-0.000341113
									2.73318	-0.00034231
									2.73845	-0.000345376
									2.74372	-0.000343159
									2.74898	-0.000342041
									2.75425	-0.000341461
									2.75951	-0.000340881
									2.76478	-0.000351098
									2.77005	-0.000360735
									2.77531	-0.000360922
									2.78058	-0.000361956
									2.78584	-0.000362989
									2.79111	-0.000366718
									2.79638	-0.000374461
									2.80164	-0.000374296
									2.80691	-0.000373859
									2.81217	-0.000370378
									2.81744	-0.00036012
									2.8227	-0.000355615
									2.82797	-0.000353182
									2.83324	-0.000350749
									2.8385	-0.000345416
									2.84377	-0.000341067
									2.84903	-0.000338578
									2.8543	-0.000336895
									2.85957	-0.000339818
									2.86483	-0.000342741
									2.8701	-0.000342637
									2.87536	-0.000336916
									2.88063	-0.000332078
									2.8859	-0.000324555
									2.89116	-0.00032201
									2.89643	-0.000320342
									2.90169	-0.000318673
									2.90696	-0.00031687
									2.91223	-0.000315544
									2.91749	-0.000313371
									2.92276	-0.000312332
									2.92802	-0.000311293
									2.93329	-0.000316285
									2.93856	-0.000320475
									2.94382	-0.000325023
									2.94909	-0.000326625
									2.95435	-0.000321981
									2.95962	-0.000322601
									2.96489	-0.000323221
									2.97015	-0.000326442
									2.97542	-0.000329523
									2.98068	-0.000329634
									2.98595	-0.000330632
									2.99122	-0.000329864
									2.99648	-0.000330765
									3.00175	-0.000331667
									3.00701	-0.000334884
									3.01228	-0.000341848
									3.01755	-0.000339786
									3.02281	-0.000332159
									3.02808	-0.000331063
									3.03334	-0.000330693
									3.03861	-0.000330323
									3.04388	-0.000333563
									3.04914	-0.000333042
									3.05441	-0.000333754
									3.05967	-0.000334288
									3.06494	-0.000334822
									3.07021	-0.000338142
									3.07547	-0.000341046
									3.08074	-0.000343329
									3.086	-0.000343914
									3.09127	-0.000344822
									3.09654	-0.000339234
									3.1018	-0.00032939
									3.10707	-0.000327331
									3.11233	-0.000325271
									3.1176	-0.000324032
									3.12287	-0.00031718
									3.12813	-0.000306507
									3.1334	-0.000305019
									3.13866	-0.000303895
									3.14393	-0.000303566
									3.1492	-0.000303236
									3.15446	-0.000302336
									3.15973	-0.000298422
									3.16499	-0.000293162
									3.17026	-0.000282015
									3.17553	-0.00027635
									3.18079	-0.000274216
									3.18606	-0.000268227
									3.19132	-0.000264239
									3.19659	-0.000260448
									3.20186	-0.000257653
									3.20712	-0.000257107
									3.21239	-0.00025656
									3.21765	-0.000256646
									3.22292	-0.000256066
									3.22819	-0.000254799
									3.23345	-0.000248351
									3.23872	-0.000236026
									3.24398	-0.00022938
									3.24925	-0.000227029
									3.25452	-0.000224677
									3.25978	-0.000221674
									3.26505	-0.0002186
									3.27031	-0.0002149
									3.27558	-0.000213905
									3.28085	-0.00021291
									3.28611	-0.000217073
									3.29138	-0.000217356
									3.29664	-0.000216012
									3.30191	-0.00021262
									3.30718	-0.000206861
									3.31244	-0.00020249
									3.31771	-0.000202725
									3.32297	-0.00020296
									3.32824	-0.000204909
									3.33351	-0.000207524
									3.33877	-0.00020481
									3.34404	-0.000204745
									3.3493	-0.00020468
									3.35457	-0.000213718
									3.35984	-0.000217844
									3.3651	-0.000215569
									3.37037	-0.000213294
									3.37563	-0.000209934
									3.3809	-0.000201563
									3.38617	-0.000200868
									3.39143	-0.000200173
									3.3967	-0.000200176
									3.40196	-0.000198707
									3.40723	-0.000194736
									3.4125	-0.00019196
									3.41776	-0.000191014
									3.42303	-0.000190068
									3.42829	-0.000192321
									3.43356	-0.000183399
									3.43883	-0.000173806
									3.44409	-0.000167869
									3.44936	-0.000155132
									3.45462	-0.000146988
									3.45989	-0.000142595
									3.46516	-0.000138433
									3.47042	-0.000137037
									3.47569	-0.000133855
									3.48095	-0.000126672
									3.48622	-0.000122697
									3.49148	-0.000123946
									3.49675	-0.000125195
									3.50202	-0.000121989
									3.50728	-0.000117524
									3.51255	-0.000109617
									3.51781	-0.000100293
									3.52308	-9.34256e-05
									3.52835	-9.07731e-05
									3.53361	-8.94185e-05
									3.53888	-8.99349e-05
									3.54414	-9.04514e-05
									3.54941	-8.80537e-05
									3.55468	-8.69848e-05
									3.55994	-8.69303e-05
									3.56521	-8.68758e-05
									3.57047	-8.42637e-05
									3.57574	-7.95204e-05
									3.58101	-7.39614e-05
									3.58627	-6.57476e-05
									3.59154	-6.13778e-05
									3.5968	-5.91152e-05
									3.60207	-5.68526e-05
									3.60734	-5.47266e-05
									3.6126	-5.33866e-05
									3.61787	-5.21947e-05
									3.62313	-5.10769e-05
									3.6284	-5.27189e-05
									3.63367	-5.4361e-05
									3.63893	-5.85903e-05
									3.6442	-6.09454e-05
									3.64946	-5.8858e-05
									3.65473	-5.15775e-05
									3.66	-5.14032e-05
									3.66526	-5.1229e-05
									3.67053	-5.2318e-05
									3.67579	-5.08977e-05
									3.68106	-4.90099e-05
									3.68633	-4.71222e-05
									3.69159	-4.61313e-05
									3.69686	-4.51404e-05
									3.70212	-4.43116e-05
									3.70739	-4.4747e-05
									3.71266	-4.87313e-05
									3.71792	-5.16915e-05
									3.72319	-4.35338e-05
									3.72845	-3.84281e-05
									3.73372	-3.55779e-05
									3.73899	-3.58242e-05
									3.74425	-3.60706e-05
									3.74952	-3.67964e-05
									3.75478	-3.66995e-05
									3.76005	-3.57836e-05
									3.76532	-3.55138e-05
									3.77058	-3.5244e-05
									3.77585	-3.68594e-05
									3.78111	-3.93139e-05
									3.78638	-3.83398e-05
									3.79165	-3.73657e-05
									3.79691	-3.07605e-05
									3.80218	-2.98047e-05
									3.80744	-2.88488e-05
									3.81271	-2.931e-05
									3.81798	-2.46194e-05
									3.82324	-2.33663e-05
									3.82851	-2.27853e-05
									3.83377	-2.22044e-05
									3.83904	-2.22956e-05
									3.84431	-3.13408e-05
									3.84957	-3.63236e-05
									3.85484	-3.49005e-05
									3.8601	-3.34774e-05
									3.86537	-2.82765e-05
									3.87064	-1.72665e-05
									3.8759	-1.5765e-05
									3.88117	-1.42636e-05
									3.88643	-1.26554e-05
									3.8917	-1.10472e-05
									3.89697	-8.55075e-06
									3.90223	-8.04539e-06
									3.9075	-7.54003e-06
									3.91276	-9.84895e-06
									3.91803	-1.44229e-05
									3.9233	-1.50716e-05
									3.92856	-1.85158e-05
									3.93383	-2.02459e-05
									3.93909	-1.73641e-05
									3.94436	-1.54158e-05
									3.94963	-1.77305e-05
									3.95489	-2.00451e-05
									3.96016	-2.57756e-05
									3.96542	-2.78276e-05
									3.97069	-3.04515e-05
									3.97596	-3.36255e-05
									3.98122	-4.15174e-05
									3.98649	-5.61837e-05
									3.99175	-6.4673e-05
									3.99702	-6.95385e-05
									4.00229	-7.42921e-05
									4.00755	-7.5258e-05
									4.01282	-7.35141e-05
									4.01808	-7.23047e-05
									4.02335	-7.3859e-05
									4.02862	-7.54133e-05
									4.03388	-7.89002e-05
									4.03915	-7.65905e-05
									4.04441	-7.62552e-05
									4.04968	-7.59199e-05
									4.05495	-8.51908e-05
									4.06021	-9.11038e-05
									4.06548	-9.1279e-05
									4.07074	-9.37925e-05
									4.07601	-9.29701e-05
									4.08128	-9.09413e-05
									4.08654	-9.04941e-05
									4.09181	-9.00469e-05
									4.09707	-9.69951e-05
									4.10234	-0.000101061
									4.10761	-0.000104463
									4.11287	-0.000104363
									4.11814	-0.000107533
									4.1234	-0.000123499
									4.12867	-0.000135369
									4.13394	-0.000136911
									4.1392	-0.000140303
									4.14447	-0.000141178
									4.14973	-0.000136145
									4.155	-0.000134564
									4.16026	-0.000133368
									4.16553	-0.000133574
									4.1708	-0.000133779
									4.17606	-0.000134137
									4.18133	-0.000124993
									4.18659	-0.000124
									4.19186	-0.000123007
									4.19713	-0.000122139
									4.20239	-0.000123177
									4.20766	-0.000121988
									4.21292	-0.000119096
									4.21819	-0.000116718
									4.22346	-0.000109306
									4.22872	-0.000106974
									4.23399	-0.000105441
									4.23925	-0.000103909
									4.24452	-0.000102184
									4.24979	-0.000100412
									4.25505	-9.91115e-05
									4.26032	-0.00010142
									4.26558	-0.000103728
									4.27085	-0.000112441
									4.27612	-0.000114646
									4.28138	-0.000113305
									4.28665	-0.00010992
									4.29191	-0.000108463
									4.29718	-0.0001075
									4.30245	-0.000106537
									4.30771	-0.000105853
									4.31298	-0.000107393
									4.31824	-0.000110687
									4.32351	-0.000111454
									4.32878	-0.000110394
									4.33404	-0.000109334
									4.33931	-0.000114582
									4.34457	-0.000113654
									4.34984	-0.000112037
									4.35511	-0.000110421
									4.36037	-0.000101309
									4.36564	-9.68848e-05
									4.3709	-9.42672e-05
									4.37617	-9.337e-05
									4.38144	-9.24727e-05
									4.3867	-9.21653e-05
									4.39197	-9.20403e-05
									4.39723	-8.99502e-05
									4.4025	-8.93659e-05
									4.40777	-8.87816e-05
									4.41303	-8.96573e-05
									4.4183	-8.76548e-05
									4.42356	-8.31241e-05
									4.42883	-7.52427e-05
									4.4341	-7.41259e-05
									4.43936	-7.30984e-05
									4.44463	-7.20709e-05
									4.44989	-7.11327e-05
									4.45516	-7.44934e-05
									4.46043	-7.30473e-05
									4.46569	-7.19104e-05
									4.47096	-7.11006e-05
									4.47622	-7.02907e-05
									4.48149	-7.59187e-05
									4.48676	-8.15068e-05
									4.49202	-7.84983e-05
									4.49729	-6.78723e-05
									4.50255	-5.69464e-05
									4.50782	-5.02189e-05
									4.51309	-4.67176e-05
									4.51835	-4.49599e-05
									4.52362	-4.1621e-05
									4.52888	-3.98697e-05
									4.53415	-3.83305e-05
									4.53942	-3.88135e-05
									4.54468	-3.92965e-05
									4.54995	-4.11063e-05
									4.55521	-4.01958e-05
									4.56048	-4.03525e-05
									4.56575	-3.87142e-05
									4.57101	-2.79335e-05
									4.57628	-2.44389e-05
									4.58154	-2.09443e-05
									4.58681	-1.80191e-05
									4.59208	-1.53269e-05
									4.59734	-1.08993e-05
									4.60261	-7.91538e-06
									4.60787	-6.77361e-06
									4.61314	-6.90685e-06
									4.61841	-7.04009e-06
									4.62367	-5.67699e-06
									4.62894	-4.50147e-06
									4.6342	-3.32595e-06
									4.63947	1.12278e-06
									4.64474	3.07475e-06
									4.65	3.36306e-06
									4.65527	3.65137e-06
									4.66053	-4.18367e-06
									4.6658	-1.00787e-05
									4.67107	-1.33069e-05
									4.67633	-1.51063e-05
									4.6816	-2.18433e-05
									4.68686	-3.05308e-05
									4.69213	-3.59623e-05
									4.6974	-3.61111e-05
									4.70266	-3.39687e-05
									4.70793	-2.85378e-05
									4.71319	-1.63503e-05
									4.71846	-6.50141e-06
									4.72373	-4.4537e-06
									4.72899	-2.406e-06
									4.73426	-8.38719e-07
									4.73952	7.02001e-06
									4.74479	6.88398e-06
									4.75006	6.74795e-06
									4.75532	4.21815e-06
									4.76059	-2.29116e-06
									4.76585	-3.81094e-06
									4.77112	-1.86607e-06
									4.77639	-6.46927e-07
									4.78165	3.72409e-06
									4.78692	8.53099e-06
									4.79218	9.57304e-06
									4.79745	1.06151e-05
									4.80272	1.10919e-05
									4.80798	1.5265e-05
									4.81325	1.50644e-05
									4.81851	1.48638e-05
									4.82378	1.28223e-05
									4.82905	6.62658e-06
									4.83431	1.0406e-05
									4.83958	1.3932e-05
									4.84484	1.68346e-05
									4.85011	2.8347e-05
									4.85537	3.99186e-05
									4.86064	4.31128e-05
									4.86591	4.52946e-05
									4.87117	4.64507e-05
									4.87644	4.99595e-05
									4.8817	6.13724e-05
									4.88697	6.16043e-05
									4.89224	6.18361e-05
									4.8975	6.11116e-05
									4.90277	6.17907e-05
									4.90803	6.86199e-05
									4.9133	7.10729e-05
									4.91857	7.3253e-05
									4.92383	8.41607e-05
									4.9291	8.53493e-05
									4.93436	8.6538e-05
									4.93963	8.80852e-05
									4.9449	8.90413e-05
									4.95016	8.99973e-05
									4.95543	9.07625e-05
									4.96069	8.85968e-05
									4.96596	8.64311e-05
									4.97123	7.5649e-05
									4.97649	7.43005e-05
									4.98176	7.75389e-05
									4.98702	8.20625e-05
									4.99229	9.00391e-05
									4.99756	9.47947e-05
									5.00282	9.92949e-05
									5.00809	0.000100876
									5.01335	0.000101566
									5.01862	0.000102257
									5.02389	0.000109287
									5.02915	0.000111495
									5.03442	0.000112311
									5.03968	0.000113127
									5.04495	0.000109344
									5.05022	0.000110288
									5.05548	0.00011329
									5.06075	0.000118116
									5.06601	0.000118998
									5.07128	0.00011988
									5.07655	0.000119741
									5.08181	0.000119646
									5.08708	0.000116224
									5.09234	0.000117847
									5.09761	0.000119011
									5.10288	0.000116656
									5.10814	0.000114301
									5.11341	0.00010774
									5.11867	0.000107167
									5.12394	0.000115836
									5.12921	0.000129619
									5.13447	0.00014022
									5.13974	0.000142139
									5.145	0.000143262
									5.15027	0.000149932
									5.15554	0.000156241
									5.1608	0.00016019
									5.16607	0.000161312
									5.17133	0.000161418
									5.1766	0.000161524
									5.18187	0.000161077
									5.18713	0.000162625
									5.1924	0.000166468
									5.19766	0.000173894
									5.20293	0.000176976
									5.2082	0.000178636
									5.21346	0.00017874
									5.21873	0.000178845
									5.22399	0.000176639
									5.22926	0.000177558
									5.23453	0.000178476
									5.23979	0.000173942
									5.24506	0.000169905
									5.25032	0.000166309
									5.25559	0.000161897
									5.26086	0.000159504
									5.26612	0.000158059
									5.27139	0.000161296
									5.27665	0.000163155
									5.28192	0.000162499
									5.28719	0.000161842
									5.29245	0.000160561
									5.29772	0.000157463
									5.30298	0.000157683
									5.30825	0.000155557
									5.31352	0.00015343
									5.31878	0.000144289
									5.32405	0.000144652
									5.32931	0.000149025
									5.33458	0.000150704
									5.33985	0.00015931
									5.34511	0.000171105
									5.35038	0.000172404
									5.35564	0.000172976
									5.36091	0.000173548
									5.36618	0.000171837
									5.37144	0.000171512
									5.37671	0.000171186
									5.38197	0.000166833
									5.38724	0.000158544
									5.39251	0.000158434
									5.39777	0.000154446
									5.40304	0.000149674
									5.4083	0.000153727
									5.41357	0.000157833
									5.41884	0.000159618
									5.4241	0.000156753
									5.42937	0.000153889
									5.43463	0.000150497
									5.4399	0.000151339
									5.44517	0.00015218
									5.45043	0.000144083
									5.4557	0.000130035
									5.46096	0.0001247
									5.46623	0.000124806
									5.4715	0.00011863
									5.47676	0.000117688
									5.48203	0.000122802
									5.48729	0.000127744
									5.49256	0.000131625
									5.49783	0.000133134
									5.50309	0.000134677
									5.50836	0.000135801
									5.51362	0.00013564
									5.51889	0.00013548
									5.52415	0.000132996
									5.52942	0.00012536
									5.53469	0.000126945
									5.53995	0.000128631
									5.54522	0.000131092
									5.55048	0.000136283
									5.55575	0.000136665
									5.56102	0.000137047
									5.56628	0.000135629
									5.57155	0.000133703
									5.57681	0.000134066
									5.58208	0.000136121
									5.58735	0.000137207
									5.59261	0.000132651
									5.59788	0.000128095
									5.60314	0.000121451
									5.60841	0.000121153
									5.61368	0.000121584
									5.61894	0.000120476
									5.62421	0.000121281
									5.62947	0.000122086
									5.63474	0.000121979
									5.64001	0.000121589
									5.64527	0.000118797
									5.65054	0.000117723
									5.6558	0.00011823
									5.66107	0.000118737
									5.66634	0.000105803
									5.6716	9.86702e-05
									5.67687	9.45768e-05
									5.68213	9.17599e-05
									5.6874	9.20558e-05
									5.69267	9.33597e-05
									5.69793	9.77265e-05
									5.7032	9.6828e-05
									5.70846	9.59295e-05
									5.71373	9.2717e-05
									5.719	8.44956e-05
									5.72426	8.65076e-05
									5.72953	8.70329e-05
									5.73479	8.75581e-05
									5.74006	8.04596e-05
									5.74533	7.2438e-05
									5.75059	7.24049e-05
									5.75586	7.20916e-05
									5.76112	7.04296e-05
									5.76639	6.9762e-05
									5.77166	6.90944e-05
									5.77692	6.58336e-05
									5.78219	6.30317e-05
									5.78745	5.70305e-05
									5.79272	5.31239e-05
									5.79799	5.25584e-05
									5.80325	4.59609e-05
									5.80852	3.18725e-05
									5.81378	1.91378e-05
									5.81905	1.51194e-05
									5.82432	1.47344e-05
									5.82958	1.8344e-05
									5.83485	2.07668e-05
									5.84011	2.21653e-05
									5.84538	2.22622e-05
									5.85065	2.23591e-05
									5.85591	2.11544e-05
									5.86118	2.31079e-05
									5.86644	2.53603e-05
									5.87171	2.60416e-05
									5.87698	2.67228e-05
									5.88224	1.88576e-05
									5.88751	2.13249e-05
									5.89277	2.37922e-05
									5.89804	3.00086e-05
									5.90331	3.56913e-05
									5.90857	3.83222e-05
									5.91384	4.002e-05
									5.9191	4.09949e-05
									5.92437	4.19697e-05
									5.92964	4.22215e-05
									5.9349	3.94289e-05
									5.94017	3.19694e-05
									5.94543	2.34107e-05
									5.9507	1.23125e-05
									5.95597	1.63685e-06
									5.96123	1.94112e-06
									5.9665	2.90273e-06
									5.97176	3.28221e-06
									5.97703	3.6617e-06
									5.9823	2.24463e-06
									5.98756	-1.9531e-07
									5.99283	-1.1405e-06
									5.99809	-2.08569e-06
									6.00336	-1.93354e-06
									6.00863	-2.39938e-06
									6.01389	-1.18149e-05
									6.01916	-2.15041e-05
									6.02442	-2.9463e-05
									6.02969	-3.25641e-05
									6.03496	-3.38978e-05
									6.04022	-2.94347e-05
									6.04549	-2.66777e-05
									6.05075	-2.49908e-05
									6.05602	-2.53014e-05
									6.06129	-2.56119e-05
									6.06655	-2.22589e-05
									6.07182	-1.38651e-05
									6.07708	-1.22324e-05
									6.08235	-1.1272e-05
									6.08762	-1.03117e-05
									6.09288	-1.09501e-05
									6.09815	-1.15885e-05
									6.10341	-1.10952e-05
									6.10868	-4.17312e-06
									6.11395	1.79488e-06
									6.11921	5.08594e-06
									6.12448	2.82609e-06
									6.12974	5.66234e-07
									6.13501	-5.5509e-07
									6.14028	-2.69403e-06
									6.14554	-3.91214e-06
									6.15081	-1.00957e-05
									6.15607	-2.21639e-05
									6.16134	-3.32873e-05
									6.16661	-3.74727e-05
									6.17187	-3.83276e-05
									6.17714	-4.07979e-05
									6.1824	-3.96242e-05
									6.18767	-3.87178e-05
									6.19293	-3.78115e-05
									6.1982	-4.22426e-05
									6.20347	-4.41857e-05
									6.20873	-4.48946e-05
									6.214	-4.38778e-05
									6.21926	-4.28611e-05
									6.22453	-4.40431e-05
									6.2298	-5.43896e-05
									6.23506	-5.57151e-05
									6.24033	-5.69242e-05
									6.24559	-5.81332e-05
									6.25086	-5.88807e-05
									6.25613	-5.84788e-05
									6.26139	-5.80768e-05
									6.26666	-5.95231e-05
									6.27192	-6.58741e-05
									6.27719	-6.91261e-05
									6.28246	-6.97618e-05
									6.28772	-6.97145e-05
									6.29299	-7.67692e-05
									6.29825	-8.58678e-05
									6.30352	-9.59912e-05
									6.30879	-9.81438e-05
									6.31405	-9.65222e-05
									6.31932	-9.49006e-05
									6.32458	-9.13165e-05
									6.32985	-8.5113e-05
									6.33512	-8.40324e-05
									6.34038	-8.31465e-05
									6.34565	-8.22605e-05
									6.35091	-7.77601e-05
									6.35618	-7.77041e-05
									6.36145	-7.7648e-05
									6.36671	-8.13438e-05
									6.37198	-8.97452e-05
									6.37724	-8.48346e-05
									6.38251	-8.34983e-05
									6.38778	-8.21621e-05
									6.39304	-7.36846e-05
									6.39831	-7.11484e-05
									6.40357	-7.01412e-05
									6.40884	-6.91339e-05
									6.41411	-7.05122e-05
									6.41937	-7.05705e-05
									6.42464	-7.06288e-05
									6.4299	-7.07544e-05
									6.43517	-7.08799e-05
									6.44044	-7.91602e-05
									6.4457	-8.0699e-05
									6.45097	-7.98461e-05
									6.45623	-7.61767e-05
									6.4615	-6.93562e-05
									6.46677	-6.40673e-05
									6.47203	-6.38001e-05
									6.4773	-6.35328e-05
									6.48256	-6.5004e-05
									6.48783	-6.65937e-05
									6.4931	-6.23735e-05
									6.49836	-6.27447e-05
									6.50363	-6.31159e-05
									6.50889	-6.51866e-05
									6.51416	-7.39209e-05
									6.51943	-8.03015e-05
									6.52469	-8.24118e-05
									6.52996	-7.5278e-05
									6.53522	-7.07092e-05
									6.54049	-6.87579e-05
									6.54576	-6.8121e-05
									6.55102	-6.7484e-05
									6.55629	-6.74528e-05
									6.56155	-7.20938e-05
									6.56682	-7.20173e-05
									6.57209	-7.37546e-05
									6.57735	-7.54919e-05
									6.58262	-7.83422e-05
									6.58788	-8.23065e-05
									6.59315	-9.17656e-05
									6.59842	-8.69399e-05
									6.60368	-7.64888e-05
									6.60895	-7.3366e-05
									6.61421	-7.11259e-05
									6.61948	-6.93507e-05
									6.62475	-6.59696e-05
									6.63001	-6.42155e-05
									6.63528	-5.83048e-05
									6.64054	-5.38546e-05
									6.64581	-5.16811e-05
									6.65108	-5.11297e-05
									6.65634	-5.05783e-05
									6.66161	-5.12784e-05
									6.66687	-4.63759e-05
									6.67214	-3.08772e-05
									6.67741	-2.48499e-05
									6.68267	-2.19444e-05
									6.68794	-1.90389e-05
									6.6932	-1.67749e-05
									6.69847	-1.21081e-05
									6.70374	-9.87693e-06
									6.709	-9.41055e-06
									6.71427	-8.94417e-06
									6.71953	-1.05062e-05
									6.7248	-1.73687e-05
									6.73007	-2.25263e-05
									6.73533	-2.23351e-05
									6.7406	-1.66216e-05
									6.74586	-1.59229e-05
									6.75113	-1.52242e-05
									6.7564	-1.61536e-05
									6.76166	-2.04371e-05
									6.76693	-2.15659e-05
									6.77219	-2.05344e-05
									6.77746	-2.41964e-05
									6.78273	-2.60171e-05
									6.78799	-3.05711e-05
									6.79326	-3.10049e-05
									6.79852	-2.9215e-05
									6.80379	-2.7425e-05
									6.80906	-1.79015e-05
									6.81432	-7.7996e-07
									6.81959	1.17803e-05
									6.82485	1.87668e-05
									6.83012	2.58474e-05
									6.83539	3.16491e-05
									6.84065	3.90179e-05
									6.84592	4.48143e-05
									6.85118	4.78512e-05
									6.85645	4.94199e-05
									6.86172	5.00236e-05
									6.86698	5.06273e-05
									6.87225	5.07241e-05
									6.87751	5.25231e-05
									6.88278	6.25104e-05
									6.88804	7.34137e-05
									6.89331	7.53e-05
									6.89858	7.66399e-05
									6.90384	7.65764e-05
									6.90911	7.65129e-05
									6.91437	8.18939e-05
									6.91964	8.25692e-05
									6.92491	8.32446e-05
									6.93017	8.05457e-05
									6.93544	8.07088e-05
									6.9407	8.82133e-05
									6.94597	9.55181e-05
									6.95124	0.000106478
									6.9565	0.000121794
									6.96177	0.000126227
									6.96703	0.000128438
									6.9723	0.000129818
									6.97757	0.000131198
									6.98283	0.000140292
									6.9881	0.000144271
									6.99336	0.000145504
									6.99863	0.000146106
									7.0039	0.000146709
									7.00916	0.00015949
									7.01443	0.000165247
									7.01969	0.000172223
									7.02496	0.000182429
									7.03023	0.000194544
									7.03549	0.000199535
									7.04076	0.000202557
									7.04602	0.00020558
									7.05129	0.00020727
									7.05656	0.000216313
									7.06182	0.000215795
									7.06709	0.000215276
									7.07235	0.000211963
									7.07762	0.000212702
									7.08289	0.000218269
									7.08815	0.000222701
									7.09342	0.000228065
									7.09868	0.000232695
									7.10395	0.000234242
									7.10922	0.000240731
									7.11448	0.000249437
									7.11975	0.000255292
									7.12501	0.000262003
									7.13028	0.000264031
									7.13555	0.0002645
									7.14081	0.000264969
									7.14608	0.000262972
									7.15134	0.000264247
									7.15661	0.000270179
									7.16188	0.00027499
									7.16714	0.000283957
									7.17241	0.000291652
									7.17767	0.000293677
									7.18294	0.000233433
									7.18821	0.000173189
									7.19347	5.06757e-05
									7.19874	5.07621e-05
									7.204	0.000179581
									7.20927	0.000243792
									7.21454	0.000275825
									7.2198	0.000307857
									7.22507	0.00030945
									7.23033	0.000311043
									7.2356	0.000318224
									7.24087	0.000319912
									7.24613	0.000321254
									7.2514	0.000321874
									7.25666	0.000322495
									7.26193	0.000320832
									7.2672	0.000320442
									7.27246	0.00031968
									7.27773	0.000318919
									7.28299	0.000310194
									7.28826	0.000306909
									7.29353	0.000306948
									7.29879	0.000311247
									7.30406	0.000321889
									7.30932	0.000328459
									7.31459	0.000331711
									7.31986	0.000339237
									7.32512	0.000345275
									7.33039	0.00034808
									7.33565	0.000350833
									7.34092	0.000352573
									7.34619	0.000351243
									7.35145	0.000349913
									7.35672	0.000341279
									7.36198	0.000333838
									7.36725	0.000330462
									7.37252	0.000335467
									7.37778	0.000339536
									7.38305	0.000340927
									7.38831	0.000342079
									7.39358	0.00034237
									7.39885	0.000342662
									7.40411	0.000342094
									7.40938	0.000344942
									7.41464	0.000346636
									7.41991	0.000344797
									7.42518	0.000342959
									7.43044	0.000343405
									7.43571	0.000346034
									7.44097	0.000353182
									7.44624	0.00036249
									7.45151	0.000365486
									7.45677	0.00036688
									7.46204	0.000368274
									7.4673	0.000375208
									7.47257	0.000376792
									7.47784	0.000375539
									7.4831	0.000374285
									7.48837	0.000369788
									7.49363	0.000361676
									7.4989	0.000357205
									7.50417	0.000357454
									7.50943	0.000354373
									7.5147	0.000355848
									7.51996	0.000359596
									7.52523	0.000361765
									7.5305	0.000359474
									7.53576	0.000357182
									7.54103	0.000356721
									7.54629	0.000356299
									7.55156	0.000355877
									7.55682	0.000353715
									7.56209	0.000347183
									7.56736	0.000346167
									7.57262	0.000346601
									7.57789	0.000347035
									7.58315	0.000352563
									7.58842	0.000358411
									7.59369	0.000361698
									7.59895	0.000363449
									7.60422	0.000362484
									7.60948	0.000361519
									7.61475	0.000361635
									7.62002	0.000360212
									7.62528	0.00035879
									7.63055	0.000347349
									7.63581	0.000342026
									7.64108	0.000337407
									7.64635	0.000337012
									7.65161	0.000340548
									7.65688	0.000349771
									7.66214	0.000350707
									7.66741	0.000351642
									7.67268	0.000351023
									7.67794	0.000349825
									7.68321	0.000351625
									7.68847	0.000352018
									7.69374	0.000352411
									7.69901	0.000349365
									7.70427	0.000341702
									7.70954	0.000342177
									7.7148	0.000343098
									7.72007	0.000341539
									7.72534	0.000347464
									7.7306	0.000355598
									7.73587	0.000359826
									7.74113	0.000361652
									7.7464	0.0003619
									7.75167	0.000362148
									7.75693	0.000372577
									7.7622	0.00037688
									7.76746	0.000381184
									7.77273	0.000382483
									7.778	0.000383805
									7.78326	0.000387076
									7.78853	0.000394285
									7.79379	0.000406285
									7.79906	0.000422117
									7.80433	0.000433418
									7.80959	0.000442871
									7.81486	0.000454881
									7.82012	0.000460378
									7.82539	0.000478825
									7.83066	0.000505786
									7.83592	0.000523367
									7.84119	0.0005362
									7.84645	0.000554313
									7.85172	0.000579616
									7.85699	0.000612327
									7.86225	0.000647165
									7.86752	0.00068822
									7.87278	0.00073349
									7.87805	0.000771899
									7.88332	0.000818735
									7.88858	0.000865993
									7.89385	0.000922687
									7.89911	0.000983014
									7.90438	0.00104797
									7.90965	0.00110998
									7.91491	0.00117983
									7.92018	0.00125126
									7.92544	0.00134098
									7.93071	0.00143081
									7.93598	0.00153492
									7.94124	0.00164006
									7.94651	0.00175704
									7.95177	0.00187109
									7.95704	0.00198799
									7.96231	0.00212446
									7.96757	0.002268
									7.97284	0.00241452
									7.9781	0.00256656
									7.98337	0.00272942
									7.98864	0.00287782
									7.9939	0.00305156
									7.99917	0.00323016
									8.00443	0.00343383
									8.0097	0.00363194
									8.01497	0.00384796
									8.02023	0.00405914
									8.0255	0.00428715
									8.03076	0.00450545
									8.03603	0.00472802
									8.0413	0.00498271
									8.04656	0.00522991
									8.05183	0.0054985
									8.05709	0.00574251
									8.06236	0.00601547
									8.06763	0.00628464
									8.07289	0.00658569
									8.07816	0.00686819
									8.08342	0.00718052
									8.08869	0.00748292
									8.09396	0.00779913
									8.09922	0.00810578
									8.10449	0.00843524
									8.10975	0.0087552
									8.11502	0.00910816
									8.12029	0.00944231
									8.12555	0.0097764
									8.13082	0.0101302
									8.13608	0.010491
									8.14135	0.0108416
									8.14662	0.0112078
									8.15188	0.0116059
									8.15715	0.0119915
									8.16241	0.0123929
									8.16768	0.0127779
									8.17295	0.0131937
									8.17821	0.013591
									8.18348	0.0139886
									8.18874	0.0144426
									8.19401	0.0148839
									8.19928	0.0152957
									8.20454	0.0157107
									8.20981	0.0161736
									8.21507	0.0165995
									8.22034	0.0170849
									8.2256	0.0175426
									8.23087	0.0180234
									8.23614	0.018486
									8.2414	0.0189876
									8.24667	0.0194502
									8.25193	0.0199592
									8.2572	0.0204552
									8.26247	0.0209747
									8.26773	0.0214555
									8.273	0.021933
									8.27826	0.0224744
									8.28353	0.0230056
									8.2888	0.0235197
									8.29406	0.02405
									8.29933	0.0246203
									8.30459	0.025135
									8.30986	0.0257012
									8.31513	0.0262409
									8.32039	0.0268332
									8.32566	0.0273931
									8.33092	0.0279588
									8.33619	0.0285673
									8.34146	0.0291652
									8.34672	0.0297504
									8.35199	0.0303281
									8.35725	0.0309617
									8.36252	0.0315717
									8.36779	0.0322517
									8.37305	0.0328653
									8.37832	0.0335415
									8.38358	0.0341876
									8.38885	0.034894
									8.39412	0.0355623
									8.39938	0.0363065
									8.40465	0.0370124
									8.40991	0.037762
									8.41518	0.0384688
									8.42045	0.0392428
									8.42571	0.0399878
									8.43098	0.0408135
									8.43624	0.0416301
									8.44151	0.0424308
									8.44678	0.043313
									8.45204	0.044158
									8.45731	0.0451672
									8.46257	0.0461408
									8.46784	0.0471753
									8.47311	0.0481523
									8.47837	0.0492487
									8.48364	0.0502702
									8.4889	0.0513496
									8.49417	0.0523457
									8.49944	0.0533863
									8.5047	0.0546692
									8.50997	0.0559381
									8.51523	0.0570635
									8.5205	0.0582026
									8.52577	0.0594758
									8.53103	0.0606655
									8.5363	0.0620215
									8.54156	0.0633093
									8.54683	0.0646858
									8.5521	0.0659547
									8.55736	0.0673812
									8.56263	0.0687048
									8.56789	0.0701491
									8.57316	0.0716839
									8.57843	0.0733584
									8.58369	0.0748191
									8.58896	0.076401
									8.59422	0.0779336
									8.59949	0.079552
									8.60476	0.0811486
									8.61002	0.0827711
									8.61529	0.0845061
									8.62055	0.0860679
									8.62582	0.0878093
									8.63109	0.0894279
									8.63635	0.0911754
									8.64162	0.0928359
									8.64688	0.0946886
									8.65215	0.0964248
									8.65742	0.0982698
									8.66268	0.0999809
									8.66795	0.101685
									8.67321	0.103576
									8.67848	0.10563
									8.68375	0.107628
									8.68901	0.109409
									8.69428	0.111298
									8.69954	0.113093
									8.70481	0.114973
									8.71008	0.116667
									8.71534	0.118565
									8.72061	0.120308
									8.72587	0.122148
									8.73114	0.12384
									8.73641	0.125643
									8.74167	0.127346
									8.74694	0.129194
									8.7522	0.130881
									8.75747	0.132684
									8.76274	0.134356
									8.768	0.13604
									8.77327	0.137593
									8.77853	0.139086
									8.7838	0.140759
									8.78907	0.142393
									8.79433	0.143873
									8.7996	0.145313
									8.80486	0.146865
									8.81013	0.148239
									8.8154	0.149724
									8.82066	0.15113
									8.82593	0.152543
									8.83119	0.153782
									8.83646	0.155014
									8.84173	0.156308
									8.84699	0.157516
									8.85226	0.158675
									8.85752	0.159817
									8.86279	0.160989
									8.86806	0.162041
									8.87332	0.163221
									8.87859	0.164243
									8.88385	0.165263
									8.88912	0.166198
									8.89439	0.167156
									8.89965	0.167962
									8.90492	0.168785
									8.91018	0.169543
									8.91545	0.170293
									8.92071	0.170957
									8.92598	0.171655
									8.93125	0.17227
									8.93651	0.172862
									8.94178	0.173407
									8.94704	0.173909
									8.95231	0.174417
									8.95758	0.1749
									8.96284	0.175327
									8.96811	0.175688
									8.97337	0.176036
									8.97864	0.176332
									8.98391	0.176605
									8.98917	0.176836
									8.99444	0.177062
									8.9997	0.177235
									9.00497	0.177365
									9.01024	0.177481
									9.0155	0.177576
									9.02077	0.177636
									9.02603	0.177652
									9.0313	0.177658
									9.03657	0.177631
									9.04183	0.177604
									9.0471	0.177519
									9.05236	0.177395
									9.05763	0.177263
									9.0629	0.177097
									9.06816	0.176913
									9.07343	0.176678
									9.07869	0.176434
									9.08396	0.176164
									9.08923	0.175898
									9.09449	0.175592
									9.09976	0.175284
									9.10502	0.17494
									9.11029	0.174604
									9.11556	0.174254
									9.12082	0.17384
									9.12609	0.173427
									9.13135	0.173019
									9.13662	0.172591
									9.14189	0.172099
									9.14715	0.17164
									9.15242	0.171139
									9.15768	0.170666
									9.16295	0.170159
									9.16822	0.169671
									9.17348	0.169172
									9.17875	0.168634
									9.18401	0.168102
									9.18928	0.167576
									9.19455	0.167052
									9.19981	0.166481
									9.20508	0.165932
									9.21034	0.165314
									9.21561	0.164744
									9.22088	0.164122
									9.22614	0.163544
									9.23141	0.162874
									9.23667	0.162223
									9.24194	0.161566
									9.24721	0.160985
									9.25247	0.160378
									9.25774	0.1598
									9.263	0.159173
									9.26827	0.158587
									9.27354	0.157958
									9.2788	0.15736
									9.28407	0.156754
									9.28933	0.156105
									9.2946	0.15547
									9.29987	0.154895
									9.30513	0.154315
									9.3104	0.153685
									9.31566	0.153098
									9.32093	0.152503
									9.3262	0.151942
									9.33146	0.151335
									9.33673	0.150767
									9.34199	0.150218
									9.34726	0.149588
									9.35253	0.148978
									9.35779	0.148412
									9.36306	0.147851
									9.36832	0.147248
									9.37359	0.146718
									9.37886	0.146125
									9.38412	0.145577
									9.38939	0.14502
									9.39465	0.144493
									9.39992	0.143937
									9.40519	0.143415
									9.41045	0.142867
									9.41572	0.142327
									9.42098	0.141762
									9.42625	0.141237
									9.43152	0.140685
									9.43678	0.140162
									9.44205	0.139664
									9.44731	0.139125
									9.45258	0.138606
									9.45785	0.138076
									9.46311	0.137602
									9.46838	0.137085
									9.47364	0.136598
									9.47891	0.136105
									9.48418	0.135617
									9.48944	0.135085
									9.49471	0.1346
									9.49997	0.134096
									9.50524	0.133608
									9.51051	0.133094
									9.51577	0.13251
									9.52104	0.131978
									9.5263	0.131515
									9.53157	0.131077
									9.53684	0.130607
									9.5421	0.130175
									9.54737	0.129714
									9.55263	0.12928
									9.5579	0.1288
									9.56317	0.128357
									9.56843	0.127894
									9.5737	0.127462
									9.57896	0.127011
									9.58423	0.12659
									9.58949	0.126136
									9.59476	0.125713
									9.60003	0.125314
									9.60529	0.124886
									9.61056	0.124484
									9.61582	0.124064
									9.62109	0.123674
									9.62636	0.123233
									9.63162	0.122821
									9.63689	0.122396
									9.64215	0.121996
									9.64742	0.121576
									9.65269	0.121188
									9.65795	0.120799
									9.66322	0.120375
									9.66848	0.119977
									9.67375	0.119607
									9.67902	0.11923
									9.68428	0.118825
									9.68955	0.118474
									9.69481	0.118071
									9.70008	0.11769
									9.70535	0.11729
									9.71061	0.116928
									9.71588	0.116533
									9.72114	0.116181
									9.72641	0.115813
									9.73168	0.115454
									9.73694	0.115079
									9.74221	0.11475
									9.74747	0.114425
									9.75274	0.114068
									9.75801	0.113729
									9.76327	0.113407
									9.76854	0.113045
									9.7738	0.112612
									9.77907	0.112251
									9.78434	0.111911
									9.7896	0.111604
									9.79487	0.111279
									9.80013	0.110966
									9.8054	0.110642
									9.81067	0.110354
									9.81593	0.110052
									9.8212	0.109758
									9.82646	0.109476
									9.83173	0.109178
									9.837	0.10887
									9.84226	0.108574
									9.84753	0.108293
									9.85279	0.107892
									9.85806	0.107406
									9.86333	0.106983
									9.86859	0.106715
									9.87386	0.106419
									9.87912	0.106163
									9.88439	0.105896
									9.88966	0.105651
									9.89492	0.105397
									9.90019	0.105167
									9.90545	0.104914
									9.91072	0.104675
									9.91599	0.104447
									9.92125	0.104203
									9.92652	0.103967
									9.93178	0.103756
									9.93705	0.103549
									9.94232	0.103316
									9.94758	0.103114
									9.95285	0.102918
									9.95811	0.102722
									9.96338	0.102512
									9.96865	0.102341
									9.97391	0.102155
									9.97918	0.101965
									9.98444	0.101775
									9.98971	0.101604
									9.99498	0.101434
									10.0002	0.101263
									10.0055	0.101106
									10.0108	0.100951
									10.016	0.100803
									10.0213	0.100658
									10.0266	0.100536
									10.0318	0.100406
									10.0371	0.100298
									10.0424	0.100184
									10.0476	0.100073
									10.0529	0.0999649
									10.0582	0.099871
									10.0634	0.0997737
									10.0687	0.0996904
									10.074	0.0996196
									10.0792	0.099557
									10.0845	0.0994936
									10.0898	0.0994392
									10.095	0.0993996
									10.1003	0.0993696
									10.1056	0.0993436
									10.1108	0.0993301
									10.1161	0.099321
									10.1214	0.0993156
									10.1266	0.0993214
									10.1319	0.0993318
									10.1372	0.0993525
									10.1424	0.09939
									10.1477	0.0994423
									10.153	0.0994964
									10.1582	0.0995473
									10.1635	0.0996168
									10.1688	0.0997064
									10.174	0.0998
									10.1793	0.0998982
									10.1846	0.100004
									10.1898	0.100127
									10.1951	0.10025
									10.2003	0.100391
									10.2056	0.10053
[truncated: 1,989 more rows]
