# Supplementary material for: LC8 enhances 53BP1 foci through heterogeneous bridging of 53BP1 oligomers
Source: eLife. 2025 Apr 29;14:e102179. doi: 10.7554/eLife.102179 (PMC12187134; doi:10.7554/eLife.102179)
Supplement: Figure 7—source data 1. [file elife-102179-fig7-data1.xlsx]

## Sheet: T1171E
volume (mL)	Molar Mass 1	volume (mL)	Molar Mass 2									volume (mL)	RI
10.0651	116626	16.1578	24933.5									3.02018	-0.000426904
10.071	116919	16.1638	25252									3.02632	-0.000414941
10.077	116717	16.1698	25142.2									3.03247	-0.000414294
10.083	116526	16.1758	25085.7									3.03861	-0.000417117
10.089	116367	16.1817	25026.1									3.04476	-0.00041994
10.0949	116248	16.1877	24932.8									3.0509	-0.000426234
10.1009	116109	16.1937	24862.2									3.05704	-0.000462921
10.1069	115970	16.1997	24820.5									3.06319	-0.000494086
10.1129	115816	16.2056	24770.7									3.06933	-0.000503498
10.1188	115596	16.2116	24714.8									3.07547	-0.000486468
10.1248	115272	16.2176	24676.3									3.08162	-0.000430885
10.1308	114915	16.2235	24596.8									3.08776	-0.000377909
10.1368	114724	16.2295	24558.5									3.0939	-0.000359865
10.1427	114570	16.2355	24464.6									3.10005	-0.000359492
10.1487	114310	16.2415	24386.9									3.10619	-0.000359367
10.1547	114133	16.2474	24280.6									3.11234	-0.000360266
10.1606	114044	16.2534	24227.5									3.11848	-0.000361165
10.1666	113950	16.2594	24152.5									3.12462	-0.000398838
10.1726	113753	16.2654	24113.8									3.13077	-0.000433777
10.1786	113572	16.2713	24048.6									3.13691	-0.000453446
10.1845	113356	16.2773	24005									3.14305	-0.000449761
10.1905	113172	16.2833	23950.5									3.1492	-0.000408539
10.1965	112921	16.2893	23895.6									3.15534	-0.000351852
10.2025	112736	16.2952	23823.2									3.16148	-0.000338117
10.2084	112482	16.3012	23771									3.16763	-0.000337712
10.2144	112316	16.3072	23704									3.17377	-0.000338376
10.2204	112131	16.3131	23620.3									3.17992	-0.00033904
10.2264	112003	16.3191	23547.1									3.18606	-0.000348369
10.2323	111896	16.3251	23494.2									3.1922	-0.000357698
10.2383	111771	16.3311	23449.7									3.19835	-0.000398932
10.2443	111690	16.337	23393.3									3.20449	-0.000418066
10.2502	111524	16.343	23336.8									3.21063	-0.00042241
10.2562	111384	16.349	23286.7									3.21678	-0.000414339
10.2622	111207	16.355	23252.5									3.22292	-0.000358449
10.2682	111078	16.3609	23213.6									3.22907	-0.000335626
10.2741	110926	16.3669	23161.2									3.23521	-0.000325545
10.2801	110802	16.3729	23098.3									3.24135	-0.000315464
10.2861	110648	16.3789	23022.4									3.2475	-0.000313067
10.2921	110546	16.3848	22947									3.25364	-0.000313162
10.298	110481	16.3908	22873.7									3.25978	-0.000337049
10.304	110446	16.3968	22809.9									3.26593	-0.000360935
10.31	110370	16.4027	22747.1									3.27207	-0.000380535
10.316	110258	16.4087	22680.8									3.27821	-0.000396816
10.3219	110135	16.4147	22621									3.28436	-0.000374603
10.3279	109996	16.4207	22552.1									3.2905	-0.000323012
10.3339	109852	16.4266	22489.2									3.29665	-0.000278321
10.3398	109654	16.4326	22424.8									3.30279	-0.00026898
10.3458	109411	16.4386	22367.9									3.30893	-0.00025964
10.3518	109196	16.4446	22306.9									3.31508	-0.000250179
10.3578	109040	16.4505	22249.8									3.32122	-0.000221181
10.3637	108925	16.4565	22185.4									3.32736	-0.000221307
10.3697	108811	16.4625	22122.7									3.33351	-0.000221433
10.3757	108713	16.4685	22063.1									3.33965	-0.000230756
10.3817	108600	16.4744	22006.7									3.34579	-0.000240015
10.3876	108487	16.4804	21954.7									3.35194	-0.000225236
10.3936	108339	16.4864	21911.2									3.35808	-0.000189967
10.3996	108207	16.4923	21857.9									3.36423	-0.00013622
10.4056	108056	16.4983	21793									3.37037	-9.57725e-05
10.4115	107959	16.5043	21736.7									3.37651	-9.04016e-05
10.4175	107846	16.5103	21691.4									3.38266	-8.54965e-05
10.4235	107750	16.5162	21645.1									3.3888	-6.96128e-05
10.4294	107652	16.5222	21596									3.39494	-6.02353e-05
10.4354	107525	16.5282	21553.3									3.40109	-6.23715e-05
10.4414	107436	16.5342	21514.3									3.40723	-6.45076e-05
10.4474	107315	16.5401	21473.5									3.41337	-9.22512e-05
10.4533	107197	16.5461	21425.6									3.41952	-7.58221e-05
10.4593	107061	16.5521	21373.1									3.42566	-6.06607e-05
10.4653	106941	16.5581	21318.6									3.43181	-2.77531e-05
10.4713	106809	16.564	21264.7									3.43795	2.14262e-05
10.4772	106703	16.57	21205.4									3.44409	4.25125e-05
10.4832	106578	16.576	21149.7									3.45024	4.35568e-05
10.4892	106462	16.5819	21097.5									3.45638	4.46012e-05
10.4952	106347	16.5879	21053.3									3.46252	4.77322e-05
10.5011	106238	16.5939	21008.8									3.46867	4.72505e-05
10.5071	106129	16.5999	20957.6									3.47481	4.67688e-05
10.5131	106023	16.6058	20918.5									3.48095	1.78913e-05
10.519	105907	16.6118	20873.9									3.4871	1.10481e-05
10.525	105787	16.6178	20826.5									3.49324	3.44211e-05
10.531	105681	16.6238	20777.2									3.49939	7.85017e-05
10.537	105570	16.6297	20742.7									3.50553	0.000133258
10.5429	105452	16.6357	20698.4									3.51167	0.000183001
10.5489	105337	16.6417	20666.8									3.51782	0.000206996
10.5549	105200	16.6476	20623.8									3.52396	0.000212404
10.5609	105022	16.6536	20581.3									3.5301	0.000222873
10.5668	104839	16.6596	20542									3.53625	0.000220288
10.5728	104688	16.6656	20516.2									3.54239	0.000217702
10.5788	104544	16.6715	20463.4									3.54853	0.000206517
10.5848	104413	16.6775	20407.2									3.55468	0.00017359
10.5907	104288	16.6835	20370									3.56082	0.000165044
10.5967	104176	16.6895	20320.5									3.56697	0.000186305
10.6027	104048	16.6954	20271.4									3.57311	0.000232238
10.6086	103887	16.7014	20222.1									3.57925	0.000286822
10.6146	103727	16.7074	20186.2									3.5854	0.000286394
10.6206	103577	16.7134	20134.6									3.59154	0.000285966
10.6266	103435	16.7193	20088.6									3.59768	0.000284624
10.6325	103297	16.7253	20038.6									3.60383	0.000274755
10.6385	103152	16.7313	20017.4									3.60997	0.000265903
10.6445	102975	16.7372	20006.6									3.61612	0.000228014
10.6505	102811	16.7432	19986.8									3.62226	0.000182609
10.6564	102657	16.7492	19979.8									3.6284	0.000157074
10.6624	102517	16.7552	19953.3									3.63455	0.00015672
10.6684	102373	16.7611	19892									3.64069	0.000213491
10.6744	102230	16.7671	19828.6									3.64683	0.000267019
10.6803	102103	16.7731	19790									3.65298	0.00028204
10.6863	101979	16.7791	19752.2									3.65912	0.00028924
10.6923	101862	16.785	19712.1									3.66526	0.00029052
10.6982	101725	16.791	19660.5									3.67141	0.000293268
10.7042	101592	16.797	19624.4									3.67755	0.000294314
10.7102	101463	16.803	19603									3.6837	0.000274058
10.7162	101305	16.8089	19569.5									3.68984	0.000253802
10.7221	101122	16.8149	19547.4									3.69598	0.000230301
10.7281	100954	16.8209	19505.3									3.70213	0.000240691
10.7341	100812	16.8268	19462.1									3.70827	0.000273425
10.7401	100654	16.8328	19442.6									3.71441	0.000324963
10.746	100481	16.8388	19341.9									3.72056	0.000360213
10.752	100315											3.7267	0.000374405
10.758	100140											3.73284	0.000381838
10.7639	99971.3											3.73899	0.000388529
10.7699	99824.5											3.74513	0.000378437
10.7759	99684.5											3.75128	0.000368346
10.7819	99523.1											3.75742	0.000345373
10.7878	99358.7											3.76356	0.000303236
10.7938	99174.4											3.76971	0.000304834
10.7998	98989.6											3.77585	0.000323171
10.8058	98861.8											3.78199	0.000352563
10.8117	98751.4											3.78814	0.000357766
10.8177	98623.2											3.79428	0.000359979
10.8237	98461.5											3.80042	0.000362191
10.8297	98297.5											3.80657	0.000363138
10.8356	98129.1											3.81271	0.000363087
10.8416	97989.2											3.81886	0.000359284
10.8476	97826.4											3.825	0.000355481
10.8535	97705.4											3.83114	0.000323896
10.8595	97588.2											3.83729	0.000308918
10.8655	97489.6											3.84343	0.00030742
10.8715	97285.4											3.84957	0.000323866
10.8774	97084.1											3.85572	0.000336823
10.8834	96871.3											3.86186	0.000341363
10.8894	96673.5											3.868	0.00033984
10.8954	96460.7											3.87415	0.000338316
10.9013	96265.8											3.88029	0.000335477
10.9073	96140											3.88644	0.000332638
10.9133	95974.4											3.89258	0.000325541
10.9193	95780.7											3.89872	0.000288799
10.9252	95548.1											3.90487	0.000272891
10.9312	95345.7											3.91101	0.000252548
10.9372	95109.9											3.91715	0.000249891
10.9431	94892.5											3.9233	0.000280634
10.9491	94732.6											3.92944	0.000298351
10.9551	94579.4											3.93559	0.000302049
10.9611	94385.6											3.94173	0.000298942
10.967	94176.3											3.94787	0.000295835
10.973	94016.2											3.95402	0.000294497
10.979	93933.3											3.96016	0.000293159
10.985	93906.7											3.9663	0.000250164
10.9909	93835.6											3.97245	0.000212513
10.9969	93688.9											3.97859	0.000191807
11.0029	93487.8											3.98473	0.000192249
11.0089	93208.9											3.99088	0.000219569
11.0148	92972.6											3.99702	0.000272518
11.0208	92795.3											4.00317	0.000290062
11.0268	92604.3											4.00931	0.000291604
11.0327	92359.6											4.01545	0.000293146
11.0387	92150.8											4.0216	0.000290771
11.0447	91979.3											4.02774	0.000288395
11.0507	91860.5											4.03388	0.000283404
11.0566	91678											4.04003	0.000225971
11.0626	91494.6											4.04617	0.000207652
11.0686	91313.8											4.05231	0.00019889
11.0746	91115.3											4.05846	0.000201587
11.0805	90805.7											4.0646	0.000243969
11.0865	90565.7											4.07075	0.000267513
11.0925	90336.3											4.07689	0.000276612
11.0985	90137.7											4.08303	0.000270776
11.1044	89971.5											4.08918	0.00026494
11.1104	89779											4.09532	0.000256789
11.1164	89588											4.10146	0.000248756
11.1223	89412.5											4.10761	0.000186059
11.1283	89279.3											4.11375	0.000130831
11.1343	89051.1											4.11989	0.00012344
11.1403	88809.4											4.12604	0.000131319
11.1462	88509											4.13218	0.000151318
11.1522	88234.5											4.13833	0.000188694
11.1582	87995.6											4.14447	0.00018692
11.1642	87767.9											4.15061	0.000185147
11.1701	87575.9											4.15676	0.000177561
11.1761	87369.1											4.1629	0.000164769
11.1821	87133											4.16904	0.000159023
11.1881	86906.2											4.17519	0.000153276
11.194	86724											4.18133	8.24131e-05
11.2	86565.2											4.18747	4.13676e-05
11.206	86462.5											4.19362	4.26513e-05
11.2119	86416.6											4.19976	6.77536e-05
11.2179	86253.6											4.20591	0.000102473
11.2239	86024.3											4.21205	0.000117334
11.2299	85779.3											4.21819	0.00011437
11.2358	85587											4.22434	0.000111406
11.2418	85345.2											4.23048	0.000104986
11.2478	85112.4											4.23662	0.000102597
11.2538	84853.8											4.24277	8.13319e-05
11.2597	84659.4											4.24891	2.49195e-05
												4.25505	-7.86174e-06
												4.2612	-9.71082e-06
												4.26734	-9.82341e-07
												4.27349	3.28284e-05
												4.27963	4.72217e-05
												4.28577	4.83538e-05
												4.29192	4.94858e-05
												4.29806	5.00767e-05
												4.3042	5.79647e-05
												4.31035	6.06197e-05
												4.31649	4.80392e-05
												4.32264	3.54587e-05
												4.32878	1.95123e-05
												4.33492	2.64981e-05
												4.34107	4.44371e-05
												4.34721	8.45652e-05
												4.35335	8.52515e-05
												4.3595	8.47951e-05
												4.36564	8.43387e-05
												4.37178	8.02657e-05
												4.37793	7.82816e-05
												4.38407	7.62976e-05
												4.39022	4.46165e-05
												4.39636	1.12625e-05
												4.4025	-2.80523e-06
												4.40865	1.11796e-05
												4.41479	1.8083e-05
												4.42093	1.82097e-05
												4.42708	1.80644e-05
												4.43322	1.7919e-05
												4.43936	1.76314e-05
												4.44551	1.70675e-05
												4.45165	1.65036e-05
												4.4578	-5.3634e-06
												4.46394	-3.96639e-05
												4.47008	-6.28703e-05
												4.47623	-6.70622e-05
												4.48237	-4.02208e-05
												4.48851	-3.7432e-05
												4.49466	-3.83322e-05
												4.5008	-3.92324e-05
												4.50694	-4.14995e-05
												4.51309	-4.17671e-05
												4.51923	-4.20347e-05
												4.52538	-4.55122e-05
												4.53152	-7.95792e-05
												4.53766	-0.000101357
												4.54381	-0.000101926
												4.54995	-9.71038e-05
												4.55609	-7.26254e-05
												4.56224	-3.16841e-05
												4.56838	-3.18786e-05
												4.57452	-3.20731e-05
												4.58067	-3.3381e-05
												4.58681	-3.57097e-05
												4.59296	-3.80385e-05
												4.5991	-7.56777e-05
												4.60524	-0.000109537
												4.61139	-0.000113915
												4.61753	-9.96476e-05
												4.62367	-6.24093e-05
												4.62982	-3.40741e-05
												4.63596	-2.12844e-05
												4.6421	-2.62849e-05
												4.64825	-3.12855e-05
												4.65439	-3.97324e-05
												4.66054	-4.81794e-05
												4.66668	-6.94622e-05
												4.67282	-0.000134498
												4.67897	-0.000157273
												4.68511	-0.000156364
												4.69125	-0.000134273
												4.6974	-9.21736e-05
												4.70354	-9.29843e-05
												4.70969	-9.3795e-05
												4.71583	-0.000100178
												4.72197	-0.000116971
												4.72812	-0.000122837
												4.73426	-0.000128704
												4.7404	-0.000176427
												4.74655	-0.000216691
												4.75269	-0.000230756
												4.75883	-0.000223621
												4.76498	-0.00019636
												4.77112	-0.000176369
												4.77727	-0.000179193
												4.78341	-0.000182018
												4.78955	-0.000188242
												4.7957	-0.000186765
												4.80184	-0.000187172
												4.80798	-0.000187578
												4.81413	-0.000225564
												4.82027	-0.000237257
												4.82641	-0.000221569
												4.83256	-0.000192899
												4.8387	-0.000165833
												4.84485	-0.00016454
												4.85099	-0.000164424
												4.85713	-0.000164308
												4.86328	-0.000164402
												4.86942	-0.000165019
												4.87556	-0.000165636
												4.88171	-0.000202293
												4.88785	-0.000226389
												4.89399	-0.000231006
												4.90014	-0.00022028
												4.90628	-0.000181123
												4.91243	-0.000149746
												4.91857	-0.000147009
												4.92471	-0.000145877
												4.93086	-0.000147424
												4.937	-0.000148971
												4.94314	-0.000153197
												4.94929	-0.000202855
												4.95543	-0.000237447
												4.96157	-0.000260732
												4.96772	-0.000258738
												4.97386	-0.000206445
												4.98001	-0.000157717
												4.98615	-0.000156585
												4.99229	-0.000155452
												4.99844	-0.000150892
												5.00458	-0.000152985
												5.01072	-0.000155079
												5.01687	-0.000169314
												5.02301	-0.000224281
												5.02915	-0.000245769
												5.0353	-0.000234236
												5.04144	-0.000205622
												5.04759	-0.000169726
												5.05373	-0.000154178
												5.05987	-0.000147665
												5.06602	-0.000145827
												5.07216	-0.000145129
												5.0783	-0.000145002
												5.08445	-0.000168306
												5.09059	-0.000191609
												5.09674	-0.000212932
												5.10288	-0.000216398
												5.10902	-0.000210953
												5.11517	-0.000150336
												5.12131	-8.06711e-05
												5.12745	-7.32823e-05
												5.1336	-7.08756e-05
												5.13974	-6.84689e-05
												5.14588	-6.33116e-05
												5.15203	-6.54236e-05
												5.15817	-6.75357e-05
												5.16432	-9.44664e-05
												5.17046	-9.13981e-05
												5.1766	-7.39381e-05
												5.18275	-3.82361e-05
												5.18889	1.5258e-05
												5.19503	5.07664e-05
												5.20118	6.38088e-05
												5.20732	6.5603e-05
												5.21346	6.59372e-05
												5.21961	6.55415e-05
												5.22575	6.51457e-05
												5.2319	5.4243e-06
												5.23804	-2.02749e-05
												5.24418	-1.05354e-05
												5.25033	-3.72432e-06
												5.25647	2.16217e-05
												5.26261	3.98096e-05
												5.26876	4.69038e-05
												5.2749	5.39979e-05
												5.28104	5.91448e-05
												5.28719	5.19292e-05
												5.29333	4.47137e-05
												5.29948	2.79545e-05
												5.30562	-1.84703e-05
												5.31176	-3.49099e-05
												5.31791	-2.57342e-05
												5.32405	6.39232e-06
												5.33019	4.80358e-05
												5.33634	4.17697e-05
												5.34248	3.55036e-05
												5.34862	2.18438e-05
												5.35477	2.5149e-05
												5.36091	1.63385e-05
												5.36706	7.52796e-06
												5.3732	-1.19346e-05
												5.37934	-3.31523e-05
												5.38549	-3.03721e-05
												5.39163	-2.0732e-05
												5.39777	1.18194e-05
												5.40392	3.9628e-05
												5.41006	5.1642e-05
												5.41621	5.09889e-05
												5.42235	5.03357e-05
												5.42849	4.84035e-05
												5.43464	3.6351e-05
												5.44078	-5.82929e-06
												5.44692	-4.23096e-05
												5.45307	-4.51432e-05
												5.45921	-2.75184e-05
												5.46535	1.36027e-05
												5.4715	5.67312e-05
												5.47764	7.99174e-05
												5.48379	8.34486e-05
												5.48993	8.69799e-05
												5.49607	8.26411e-05
												5.50222	7.83023e-05
												5.50836	6.45632e-05
												5.5145	1.64649e-05
												5.52065	-5.56967e-06
												5.52679	4.60619e-06
												5.53293	2.66817e-05
												5.53908	7.4644e-05
												5.54522	0.000100339
												5.55137	0.000105405
												5.55751	0.000105746
												5.56365	0.000103794
												5.5698	0.000101842
												5.57594	9.75967e-05
												5.58208	5.26382e-05
												5.58823	1.85328e-05
												5.59437	1.22385e-05
												5.60051	2.72033e-05
												5.60666	6.75242e-05
												5.6128	0.000103907
												5.61895	0.000108244
												5.62509	0.00010896
												5.63123	0.000108471
												5.63738	0.000107983
												5.64352	9.73307e-05
												5.64966	5.29991e-05
												5.65581	5.10552e-06
												5.66195	-1.95162e-05
												5.66809	-2.36798e-05
												5.67424	6.27254e-06
												5.68038	5.4711e-05
												5.68653	5.63138e-05
												5.69267	5.6151e-05
												5.69881	5.59882e-05
												5.70496	5.26347e-05
												5.7111	5.01625e-05
												5.71724	1.12485e-05
												5.72339	-4.62416e-05
												5.72953	-7.21349e-05
												5.73567	-7.58521e-05
												5.74182	-6.87496e-05
												5.74796	-3.66115e-05
												5.75411	-2.34212e-05
												5.76025	-2.34454e-05
												5.76639	-2.43117e-05
												5.77254	-2.51779e-05
												5.77868	-2.00796e-05
												5.78482	-2.03862e-05
												5.79097	-2.06927e-05
												5.79711	-4.5733e-05
												5.80326	-3.99219e-05
												5.8094	-3.21065e-05
												5.81554	-3.95349e-06
												5.82169	3.46962e-05
												5.82783	3.82051e-05
												5.83397	3.96173e-05
												5.84012	4.10295e-05
												5.84626	4.55313e-05
												5.8524	4.06704e-05
												5.85855	3.58095e-05
												5.86469	1.91799e-05
												5.87084	7.10624e-06
												5.87698	1.30329e-05
												5.88312	2.44027e-05
												5.88927	6.97752e-05
												5.89541	8.82939e-05
												5.90155	9.6396e-05
												5.9077	9.48215e-05
												5.91384	9.3247e-05
												5.91998	8.25282e-05
												5.92613	7.18093e-05
												5.93227	4.10806e-06
												5.93842	-4.16398e-05
												5.94456	-4.91156e-05
												5.9507	-2.8886e-05
												5.95685	7.26713e-06
												5.96299	4.66795e-05
												5.96913	5.01356e-05
												5.97528	4.95118e-05
												5.98142	4.8888e-05
												5.98756	4.32206e-05
												5.99371	2.77051e-05
												5.99985	1.21897e-05
												6.006	-4.95005e-05
												6.01214	-6.67886e-05
												6.01828	-5.05408e-05
												6.02443	-2.6044e-05
												6.03057	1.58692e-05
												6.03671	1.86619e-05
												6.04286	1.85608e-05
												6.049	1.74771e-05
												6.05514	1.63934e-05
												6.06129	7.80436e-06
												6.06743	-7.84712e-07
												6.07358	-5.47582e-05
												6.07972	-8.63818e-05
												6.08586	-8.57991e-05
												6.09201	-7.53837e-05
												6.09815	-3.0732e-05
												6.10429	-1.18486e-05
												6.11044	-4.48721e-06
												6.11658	-7.96114e-06
												6.12272	-1.14351e-05
												6.12887	-2.0823e-05
												6.13501	-3.0211e-05
												6.14116	-5.22844e-05
												6.1473	-9.80162e-05
												6.15344	-0.000113598
												6.15959	-0.000105977
												6.16573	-7.99307e-05
												6.17187	-3.99312e-05
												6.17802	-3.58219e-05
												6.18416	-3.38951e-05
												6.19031	-3.34963e-05
												6.19645	-3.38616e-05
												6.20259	-3.42269e-05
												6.20874	-6.35175e-05
												6.21488	-0.000107962
												6.22102	-0.000136655
												6.22717	-0.000148857
												6.23331	-0.000136347
												6.23945	-0.000119509
												6.2456	-0.000112229
												6.25174	-0.000115434
												6.25789	-0.000118638
												6.26403	-0.000125436
												6.27017	-0.000127724
												6.27632	-0.000130011
												6.28246	-0.000161914
												6.2886	-0.00018589
												6.29475	-0.000200821
												6.30089	-0.000195665
												6.30703	-0.000156234
												6.31318	-0.000155039
												6.31932	-0.000156638
												6.32547	-0.000158238
												6.33161	-0.000155492
												6.33775	-0.000157841
												6.3439	-0.00016019
												6.35004	-0.0001698
												6.35618	-0.000207059
												6.36233	-0.000229674
												6.36847	-0.000224777
												6.37461	-0.00020355
												6.38076	-0.000187825
												6.3869	-0.000181843
												6.39305	-0.000181933
												6.39919	-0.000182022
												6.40533	-0.000180876
												6.41148	-0.000185455
												6.41762	-0.000190034
												6.42376	-0.000202834
												6.42991	-0.000223112
												6.43605	-0.000228153
												6.44219	-0.000207184
												6.44834	-0.000166742
												6.45448	-0.000134499
												6.46063	-0.000135546
												6.46677	-0.000136593
												6.47291	-0.000139525
												6.47906	-0.000123219
												6.4852	-0.000125333
												6.49134	-0.000127447
												6.49749	-0.000136149
												6.50363	-0.000139327
												6.50977	-0.00013628
												6.51592	-0.000110293
												6.52206	-7.34351e-05
												6.52821	-6.56746e-05
												6.53435	-6.3441e-05
												6.54049	-6.12075e-05
												6.54664	-5.42487e-05
												6.55278	-5.56846e-05
												6.55892	-5.71204e-05
												6.56507	-7.11659e-05
												6.57121	-9.54348e-05
												6.57736	-7.84216e-05
												6.5835	-4.57948e-05
												6.58964	-1.19866e-05
												6.59579	-7.87404e-07
												6.60193	4.48809e-06
												6.60807	9.76359e-06
												6.61422	1.41113e-05
												6.62036	2.48781e-05
												6.6265	2.96108e-05
												6.63265	1.29004e-05
												6.63879	-3.81012e-06
												6.64494	6.73089e-07
												6.65108	3.2938e-05
												6.65722	8.1844e-05
												6.66337	0.000120335
												6.66951	0.000150522
												6.67565	0.000173165
												6.6818	0.000194456
												6.68794	0.000221079
												6.69408	0.000235786
												6.70023	0.000240865
												6.70637	0.000245944
												6.71252	0.000246822
												6.71866	0.000274616
												6.7248	0.000308446
												6.73095	0.000353648
												6.73709	0.000384187
												6.74323	0.000406124
												6.74938	0.00042638
												6.75552	0.000435805
												6.76166	0.000470468
												6.76781	0.00047473
												6.77395	0.000475054
												6.7801	0.000475378
												6.78624	0.000489814
												6.79238	0.000527257
												6.79853	0.000593367
												6.80467	0.000649488
												6.81081	0.000670884
												6.81696	0.000679181
												6.8231	0.000690473
												6.82924	0.000712222
												6.83539	0.000716966
												6.84153	0.000717481
												6.84768	0.000717995
												6.85382	0.000721462
												6.85996	0.000744909
												6.86611	0.000789331
												6.87225	0.000841458
												6.87839	0.000868834
												6.88454	0.000883985
												6.89068	0.000912278
												6.89683	0.000936279
												6.90297	0.000965513
												6.90911	0.000963297
												6.91526	0.000961081
												6.9214	0.000955008
												6.92754	0.000968852
												6.93369	0.00100201
												6.93983	0.00106214
												6.94597	0.0010848
												6.95212	0.00110746
												6.95826	0.00112325
												6.96441	0.00114369
												6.97055	0.0011524
												6.97669	0.00115643
												6.98284	0.00114673
												6.98898	0.00113704
												6.99512	0.00113485
												7.00127	0.00113993
												7.00741	0.00115876
												7.01355	0.00119688
												7.0197	0.00119912
												7.02584	0.00120137
												7.03199	0.00120651
												7.03813	0.00120697
												7.04427	0.00120283
												7.05042	0.00119869
												7.05656	0.00118614
												7.0627	0.00117107
												7.06885	0.00117119
												7.07499	0.00119384
												7.08113	0.00123211
												7.08728	0.00124493
												7.09342	0.00124846
												7.09957	0.00124972
												7.10571	0.00125099
												7.11185	0.00125938
												7.118	0.00126087
												7.12414	0.00124255
												7.13028	0.00122422
												7.13643	0.00121866
												7.14257	0.00123576
												7.14871	0.0012771
												7.15486	0.00128221
												7.161	0.00128145
												7.16715	0.00128069
												7.17329	0.00127845
												7.17943	0.00126933
												7.18558	0.00126022
												7.19172	0.00124173
												7.19786	0.00119731
												7.20401	0.00117656
												7.21015	0.00117632
												7.21629	0.00118318
												7.22244	0.00118035
												7.22858	0.00117753
												7.23473	0.00117004
												7.24087	0.00114791
												7.24701	0.00112534
												7.25316	0.00111602
												7.2593	0.00109255
												7.26544	0.00103218
												7.27159	0.000974377
												7.27773	0.000950372
												7.28388	0.000934367
												7.29002	0.000930317
												7.29616	0.000926267
												7.30231	0.000914099
												7.30845	0.000879988
												7.31459	0.000856234
												7.32074	0.000844318
												7.32688	0.00082705
												7.33302	0.000788717
												7.33917	0.000728556
												7.34531	0.000687416
												7.35146	0.000682959
												7.3576	0.000678821
												7.36374	0.000672448
												7.36989	0.000660405
												7.37603	0.000642397
												7.38217	0.000619627
												7.38832	0.000603358
												7.39446	0.00060083
												7.4006	0.000568025
												7.40675	0.000514879
												7.41289	0.000463201
												7.41904	0.000438987
												7.42518	0.000445768
												7.43132	0.000445392
												7.43747	0.000445017
												7.44361	0.000437073
												7.44975	0.000422992
												7.4559	0.00040783
												7.46204	0.000387587
												7.46818	0.000366604
												7.47433	0.000323588
												7.48047	0.000268985
												7.48662	0.000250471
												7.49276	0.000252987
												7.4989	0.00027069
												7.50505	0.000274269
												7.51119	0.000271314
												7.51733	0.000268359
												7.52348	0.000244019
												7.52962	0.000227323
												7.53576	0.000206195
												7.54191	0.000158945
												7.54805	9.23114e-05
												7.5542	5.19168e-05
												7.56034	2.5651e-05
												7.56648	1.91139e-05
												7.57263	2.8965e-05
												7.57877	3.1349e-05
												7.58491	1.70238e-05
												7.59106	2.69855e-06
												7.5972	-2.44074e-05
												7.60334	-2.69916e-05
												7.60949	-5.30532e-05
												7.61563	-0.000116477
												7.62178	-0.000169959
												7.62792	-0.000185112
												7.63406	-0.000188061
												7.64021	-0.0001543
												7.64635	-0.000151784
												7.65249	-0.000154031
												7.65864	-0.000156279
												7.66478	-0.000179627
												7.67093	-0.000187929
												7.67707	-0.000207198
												7.68321	-0.000261706
												7.68936	-0.000325638
												7.6955	-0.000362991
												7.70164	-0.000387637
												7.70779	-0.000384472
												7.71393	-0.000375837
												7.72007	-0.000377184
												7.72622	-0.00037853
												7.73236	-0.000401887
												7.73851	-0.000424518
												7.74465	-0.000429556
												7.75079	-0.000456848
												7.75694	-0.000524646
												7.76308	-0.000556992
												7.76922	-0.000569568
												7.77537	-0.000569542
												7.78151	-0.000568931
												7.78765	-0.000572827
												7.7938	-0.000576724
												7.79994	-0.000602248
												7.80609	-0.000623968
												7.81223	-0.000624357
												7.81837	-0.000629819
												7.82452	-0.000679753
												7.83066	-0.000736036
												7.8368	-0.00075789
												7.84295	-0.000761663
												7.84909	-0.00075871
												7.85523	-0.00075596
												7.86138	-0.000757009
												7.86752	-0.000758058
												7.87367	-0.000772957
												7.87981	-0.00079667
												7.88595	-0.000800554
												7.8921	-0.000804439
												7.89824	-0.000864257
												7.90438	-0.000910936
												7.91053	-0.000919211
												7.91667	-0.000909853
												7.92281	-0.000899578
												7.92896	-0.00089623
												7.9351	-0.000906447
												7.94125	-0.000916664
												7.94739	-0.000935202
												7.95353	-0.000938145
												7.95968	-0.000953717
												7.96582	-0.00101016
												7.97196	-0.00106403
												7.97811	-0.00108249
												7.98425	-0.00108799
												7.99039	-0.00106708
												7.99654	-0.00105998
												8.00268	-0.00106278
												8.00883	-0.00106558
												8.01497	-0.00107141
												8.02111	-0.0010902
												8.02726	-0.00110261
												8.0334	-0.00114361
												8.03954	-0.00119087
												8.04569	-0.00122561
												8.05183	-0.00123776
												8.05798	-0.0012091
												8.06412	-0.00115714
												8.07026	-0.00115722
												8.07641	-0.00116075
												8.08255	-0.00116427
												8.08869	-0.00117575
												8.09484	-0.00118294
												8.10098	-0.00119013
												8.10712	-0.00124745
												8.11327	-0.00128106
												8.11941	-0.00127877
												8.12556	-0.00127462
												8.1317	-0.00122982
												8.13784	-0.00120201
												8.14399	-0.00119905
												8.15013	-0.00119909
												8.15627	-0.00119956
												8.16242	-0.00120003
												8.16856	-0.00120215
												8.1747	-0.00125109
												8.18085	-0.00128982
												8.18699	-0.00129302
												8.19314	-0.00129969
												8.19928	-0.00128495
												8.20542	-0.00123669
												8.21157	-0.00123331
												8.21771	-0.00122992
												8.22385	-0.00122841
												8.23	-0.0012269
												8.23614	-0.00123207
												8.24228	-0.00123723
												8.24843	-0.00125191
												8.25457	-0.00128181
												8.26072	-0.00128117
												8.26686	-0.001262
												8.273	-0.00121964
												8.27915	-0.00121383
												8.28529	-0.00121155
												8.29143	-0.00120927
												8.29758	-0.00119263
												8.30372	-0.00118046
												8.30986	-0.00118006
												8.31601	-0.00119238
												8.32215	-0.0012047
												8.3283	-0.00120105
												8.33444	-0.00117857
												8.34058	-0.00114466
												8.34673	-0.00110127
												8.35287	-0.00108108
												8.35901	-0.00107662
												8.36516	-0.00107221
												8.3713	-0.00106007
												8.37745	-0.00105406
												8.38359	-0.00106385
												8.38973	-0.00107364
												8.39588	-0.00107337
												8.40202	-0.00105868
												8.40816	-0.00102928
												8.41431	-0.000987586
												8.42045	-0.000962148
												8.42659	-0.000959281
												8.43274	-0.000956712
												8.43888	-0.000946066
												8.44503	-0.000929912
												8.45117	-0.000922891
												8.45731	-0.000929131
												8.46346	-0.00093537
												8.4696	-0.000920251
												8.47574	-0.000896442
												8.48189	-0.000857649
												8.48803	-0.00080813
												8.49417	-0.000785173
												8.50032	-0.000762573
												8.50646	-0.00073954
												8.51261	-0.000722181
												8.51875	-0.000704107
												8.52489	-0.000695677
												8.53104	-0.000687248
												8.53718	-0.000680493
												8.54332	-0.000657686
												8.54947	-0.000606791
												8.55561	-0.000555122
												8.56175	-0.000519537
												8.5679	-0.000505129
												8.57404	-0.000492504
												8.58019	-0.000467824
												8.58633	-0.000420879
												8.59247	-0.000407578
												8.59862	-0.000394278
												8.60476	-0.000388221
												8.6109	-0.000344469
												8.61705	-0.000294936
												8.62319	-0.000215748
												8.62933	-0.000150899
												8.63548	-0.000104483
												8.64162	-6.16081e-05
												8.64777	-1.19344e-05
												8.65391	5.29061e-05
												8.66005	0.000123708
												8.6662	0.000159933
												8.67234	0.000197105
												8.67848	0.000251168
												8.68463	0.000329932
												8.69077	0.000445975
												8.69691	0.000555574
												8.70306	0.000634347
												8.7092	0.000708747
												8.71535	0.000799893
												8.72149	0.0008802
												8.72763	0.000981115
												8.73378	0.00107696
												8.73992	0.00115676
												8.74606	0.00122146
												8.75221	0.00131861
												8.75835	0.00145062
												8.7645	0.00160959
												8.77064	0.00174758
												8.77678	0.00186923
												8.78293	0.00198706
												8.78907	0.00212005
												8.79521	0.00227769
												8.80136	0.00245642
												8.8075	0.0026079
												8.81364	0.00274723
												8.81979	0.00292504
												8.82593	0.00311713
												8.83208	0.0033512
												8.83822	0.00357692
												8.84436	0.00380353
												8.85051	0.00401288
												8.85665	0.00425363
												8.86279	0.00451169
												8.86894	0.00478779
												8.87508	0.0050343
												8.88122	0.00528508
												8.88737	0.00556746
												8.89351	0.0058503
												8.89966	0.00614987
												8.9058	0.00647592
												8.91194	0.00682866
												8.91809	0.00713535
												8.92423	0.00747942
												8.93037	0.00781436
												8.93652	0.00818803
												8.94266	0.00854956
												8.9488	0.00893978
												8.95495	0.0092942
												8.96109	0.00969558
												8.96724	0.0100785
												8.97338	0.0104962
												8.97952	0.0109225
												8.98567	0.0113291
												8.99181	0.0117579
												8.99795	0.0121871
												9.0041	0.0126265
												9.01024	0.0130807
												9.01638	0.0135513
												9.02253	0.0139614
												9.02867	0.0144246
												9.03482	0.014893
												9.04096	0.0153803
												9.0471	0.015847
												9.05325	0.0163333
												9.05939	0.0167778
												9.06553	0.0172645
												9.07168	0.0177282
												9.07782	0.0181963
												9.08396	0.0187124
												9.09011	0.0191835
												9.09625	0.0196431
												9.1024	0.0201013
												9.10854	0.0205761
												9.11468	0.0210398
												9.12083	0.0215441
												9.12697	0.0219867
												9.13311	0.0224543
												9.13926	0.0229045
												9.1454	0.0233759
												9.15155	0.0238321
												9.15769	0.0242913
												9.16383	0.0246976
												9.16998	0.0251467
												9.17612	0.0255822
												9.18226	0.0259922
												9.18841	0.0264408
												9.19455	0.0268819
												9.20069	0.0272707
												9.20684	0.0276709
												9.21298	0.0280979
												9.21913	0.0285065
												9.22527	0.0289322
												9.23141	0.029301
												9.23756	0.029682
												9.2437	0.0300618
												9.24984	0.0304571
												9.25599	0.0308325
												9.26213	0.0312291
												9.26827	0.0315817
												9.27442	0.0319317
												9.28056	0.0323095
												9.28671	0.0326526
												9.29285	0.0330494
												9.29899	0.0333913
												9.30514	0.0337271
												9.31128	0.0340648
												9.31742	0.0344465
												9.32357	0.0347897
												9.32971	0.0351542
												9.33585	0.0355043
												9.342	0.0358661
												9.34814	0.0362074
												9.35429	0.0365677
												9.36043	0.0369298
												9.36657	0.0373011
												9.37272	0.0376451
												9.37886	0.0380007
												9.385	0.0384019
												9.39115	0.0387929
												9.39729	0.039218
												9.40343	0.0395979
												9.40958	0.0400183
												9.41572	0.0404388
												9.42187	0.0408858
												9.42801	0.0413195
												9.43415	0.0417971
												9.4403	0.0422545
												9.44644	0.0427143
												9.45258	0.0432342
												9.45873	0.0437255
												9.46487	0.0442811
												9.47101	0.0448183
												9.47716	0.0454066
												9.4833	0.0459679
												9.48945	0.0466045
												9.49559	0.0471956
												9.50173	0.0478709
												9.50788	0.0485474
												9.51402	0.0492638
												9.52016	0.0499409
												9.52631	0.0506981
												9.53245	0.0514415
												9.5386	0.0522593
												9.54474	0.053045
												9.55088	0.0538399
												9.55703	0.0547449
												9.56317	0.0556641
												9.56931	0.0565774
												9.57546	0.0575164
												9.5816	0.0585599
												9.58774	0.0595383
												9.59389	0.0606082
												9.60003	0.061628
												9.60618	0.0627517
												9.61232	0.0638391
												9.61846	0.0650484
												9.62461	0.0662176
												9.63075	0.0674836
												9.63689	0.0687278
												9.64304	0.0700077
												9.64918	0.0714438
												9.65532	0.0727686
												9.66147	0.0742137
												9.66761	0.0755745
												9.67376	0.0770646
												9.6799	0.0784827
												9.68604	0.0800721
												9.69219	0.0815511
												9.69833	0.0831946
												9.70447	0.0848346
												9.71062	0.0868221
												9.71676	0.0887012
												9.7229	0.0905267
												9.72905	0.0922426
												9.73519	0.0941306
												9.74134	0.0960903
												9.74748	0.0979831
												9.75362	0.0999363
												9.75977	0.101921
												9.76591	0.103816
												9.77205	0.105718
												9.7782	0.107829
												9.78434	0.110074
												9.79048	0.112532
												9.79663	0.114621
												9.80277	0.116829
												9.80892	0.118871
												9.81506	0.121041
												9.8212	0.123151
												9.82735	0.125458
												9.83349	0.127673
												9.83963	0.129881
												9.84578	0.132302
												9.85192	0.134591
												9.85807	0.137199
												9.86421	0.139602
												9.87035	0.142158
												9.8765	0.144473
												9.88264	0.146948
												9.88878	0.149242
												9.89493	0.151787
												9.90107	0.154247
												9.90721	0.156901
												9.91336	0.159365
												9.9195	0.16202
												9.92565	0.164658
												9.93179	0.167502
												9.93793	0.170114
												9.94408	0.172638
												9.95022	0.175349
												9.95636	0.177936
												9.96251	0.18044
												9.96865	0.183139
												9.97479	0.186232
												9.98094	0.188985
												9.98708	0.191844
												9.99323	0.194704
												9.99937	0.197832
												10.0055	0.20058
												10.0117	0.203257
												10.0178	0.206121
												10.0239	0.208819
												10.0301	0.211349
												10.0362	0.213963
												10.0424	0.216889
												10.0485	0.219589
												10.0547	0.222496
												10.0608	0.225256
												10.0669	0.228397
												10.0731	0.231231
												10.0792	0.234174
												10.0854	0.236808
												10.0915	0.23952
												10.0977	0.242006
												10.1038	0.244747
												10.11	0.247351
												10.1161	0.250156
												10.1222	0.253012
												10.1284	0.256372
												10.1345	0.259487
												10.1407	0.262229
												10.1468	0.265061
												10.153	0.267778
												10.1591	0.270286
												10.1652	0.272647
												10.1714	0.275229
												10.1775	0.277662
												10.1837	0.280256
												10.1898	0.282697
												10.196	0.285367
												10.2021	0.287917
												10.2083	0.29063
												10.2144	0.29306
												10.2205	0.295521
												10.2267	0.297787
												10.2328	0.299934
												10.239	0.302246
												10.2451	0.30441
												10.2513	0.306764
												10.2574	0.308903
												10.2635	0.311174
												10.2697	0.313247
												10.2758	0.315538
												10.282	0.31763
												10.2881	0.319766
												10.2943	0.321726
												10.3004	0.323761
												10.3066	0.32557
												10.3127	0.327512
												10.3188	0.329363
												10.325	0.331281
												10.3311	0.333085
												10.3373	0.334823
												10.3434	0.336883
												10.3496	0.338968
												10.3557	0.340729
												10.3618	0.34235
												10.368	0.344033
												10.3741	0.345514
												10.3803	0.347094
												10.3864	0.348607
												10.3926	0.350199
												10.3987	0.351649
												10.4048	0.353161
												10.411	0.354576
												10.4171	0.356088
												10.4233	0.357486
												10.4294	0.35881
												10.4356	0.360221
												10.4417	0.361447
												10.4479	0.362712
												10.454	0.36389
												10.4601	0.365162
												10.4663	0.366356
												10.4724	0.367589
												10.4786	0.368707
												10.4847	0.369928
												10.4909	0.371065
												10.497	0.372185
												10.5031	0.373214
												10.5093	0.374245
												10.5154	0.375164
												10.5216	0.376105
												10.5277	0.376993
												10.5339	0.377881
												10.54	0.378795
												10.5462	0.379671
												10.5523	0.380497
												10.5584	0.381481
												10.5646	0.382489
												10.5707	0.38324
												10.5769	0.383969
												10.583	0.384621
												10.5892	0.385265
												10.5953	0.385846
												10.6014	0.386396
												10.6076	0.386971
												10.6137	0.387476
												10.6199	0.387931
												10.626	0.388367
												10.6322	0.388775
												10.6383	0.389111
												10.6445	0.389452
												10.6506	0.389736
												10.6567	0.390019
												10.6629	0.390231
												10.669	0.390391
												10.6752	0.390506
												10.6813	0.390539
												10.6875	0.390552
												10.6936	0.390515
												10.6997	0.390478
												10.7059	0.390328
												10.712	0.390169
												10.7182	0.389971
												10.7243	0.38978
												10.7305	0.389552
												10.7366	0.389218
												10.7428	0.388848
												10.7489	0.388409
												10.755	0.387946
												10.7612	0.387407
												10.7673	0.386803
												10.7735	0.386091
												10.7796	0.385401
												10.7858	0.38466
												10.7919	0.38394
												10.798	0.383232
												10.8042	0.382267
												10.8103	0.381189
												10.8165	0.380088
												10.8226	0.37913
												10.8288	0.378053
												10.8349	0.37697
												10.841	0.375678
												10.8472	0.374471
												10.8533	0.3732
												10.8595	0.371991
												10.8656	0.370737
												10.8718	0.369538
												10.8779	0.368129
												10.8841	0.366733
												10.8902	0.365211
												10.8963	0.363742
												10.9025	0.362249
												10.9086	0.360474
												10.9148	0.358785
												10.9209	0.357042
												10.9271	0.355413
												10.9332	0.353698
												10.9393	0.352127
												10.9455	0.350326
												10.9516	0.348504
												10.9578	0.346539
												10.9639	0.344721
												10.9701	0.342911
												10.9762	0.340814
												10.9824	0.338472
												10.9885	0.336238
												10.9946	0.334231
												11.0008	0.332147
												11.0069	0.33031
												11.0131	0.328269
												11.0192	0.326244
												11.0254	0.32399
												11.0315	0.321917
												11.0376	0.319702
												11.0438	0.317609
												11.0499	0.315202
												11.0561	0.312903
												11.0622	0.310583
												11.0684	0.308479
												11.0745	0.30632
												11.0807	0.304283
												11.0868	0.301996
												11.0929	0.299768
												11.0991	0.297568
												11.1052	0.295178
												11.1114	0.292832
												11.1175	0.290472
												11.1237	0.287983
												11.1298	0.285259
												11.1359	0.282931
												11.1421	0.280612
												11.1482	0.278472
												11.1544	0.276131
												11.1605	0.273829
												11.1667	0.271573
												11.1728	0.269117
												11.179	0.266748
												11.1851	0.264443
												11.1912	0.262013
												11.1974	0.259396
												11.2035	0.257009
												11.2097	0.254068
												11.2158	0.251557
												11.222	0.249242
												11.2281	0.247004
												11.2342	0.244542
												11.2404	0.2423
												11.2465	0.239936
												11.2527	0.237684
												11.2588	0.235136
												11.265	0.232753
												11.2711	0.230325
												11.2772	0.228104
												11.2834	0.225848
												11.2895	0.223779
												11.2957	0.221652
												11.3018	0.219259
												11.308	0.216946
												11.3141	0.214745
												11.3203	0.212615
												11.3264	0.21022
												11.3325	0.207914
												11.3387	0.205508
												11.3448	0.203342
												11.351	0.201147
												11.3571	0.199244
												11.3633	0.197298
												11.3694	0.195058
												11.3755	0.192826
												11.3817	0.190749
												11.3878	0.188754
												11.394	0.186513
												11.4001	0.184162
												11.4063	0.181679
												11.4124	0.179693
												11.4186	0.177613
												11.4247	0.175801
												11.4308	0.17388
												11.437	0.172027
												11.4431	0.169987
												11.4493	0.168077
												11.4554	0.166096
												11.4616	0.164303
												11.4677	0.162272
												11.4738	0.160279
												11.48	0.158289
												11.4861	0.156504
												11.4923	0.154835
												11.4984	0.153091
												11.5046	0.151351
												11.5107	0.149626
												11.5169	0.147914
												11.523	0.146095
												11.5291	0.1445
												11.5353	0.142738
												11.5414	0.140963
												11.5476	0.139117
												11.5537	0.137535
												11.5599	0.136025
												11.566	0.134472
												11.5721	0.132962
												11.5783	0.131459
												11.5844	0.129963
												11.5906	0.128344
												11.5967	0.126906
												11.6029	0.125385
												11.609	0.123894
												11.6151	0.122242
												11.6213	0.120825
												11.6274	0.119375
												11.6336	0.118115
												11.6397	0.116832
												11.6459	0.115558
												11.652	0.114158
												11.6582	0.112886
												11.6643	0.111543
												11.6704	0.110106
												11.6766	0.108556
												11.6827	0.107223
												11.6889	0.105943
												11.695	0.104669
												11.7012	0.103574
												11.7073	0.102439
												11.7134	0.101395
												11.7196	0.100211
												11.7257	0.0991204
												11.7319	0.0979729
												11.738	0.0969293
												11.7442	0.0956882
												11.7503	0.0943379
												11.7565	0.0931421
												11.7626	0.09202
												11.7687	0.0910104
												11.7749	0.0901111
												11.781	0.0892399
												11.7872	0.0882493
												11.7933	0.0872867
												11.7995	0.0860817
												11.8056	0.0850162
												11.8117	0.0840781
												11.8179	0.083202
												11.824	0.0821759
												11.8302	0.081256
												11.8363	0.0803615
												11.8425	0.0795807
												11.8486	0.0788019
												11.8548	0.0780709
												11.8609	0.077234
												11.867	0.0764446
												11.8732	0.0756263
												11.8793	0.0748694
												11.8855	0.0741342
												11.8916	0.0732653
												11.8978	0.0724781
												11.9039	0.0717032
												11.91	0.0710177
												11.9162	0.0703639
												11.9223	0.0697884
												11.9285	0.0691259
												11.9346	0.0684445
												11.9408	0.067746
												11.9469	0.0671139
												11.9531	0.0664831
												11.9592	0.0657242
												11.9653	0.0649679
												11.9715	0.0643109
												11.9776	0.0637095
												11.9838	0.0631314
												11.9899	0.0626667
												11.9961	0.0621531
												12.0022	0.0616118
												12.0083	0.0610236
												12.0145	0.0604715
												12.0206	0.0599036
												12.0268	0.0593329
												12.0329	0.0586928
												12.0391	0.0581251
												12.0452	0.0575926
												12.0513	0.057119
												12.0575	0.0566913
												12.0636	0.0563217
												12.0698	0.0558599
												12.0759	0.0554017
												12.0821	0.0549506
												12.0882	0.0544729
												12.0944	0.0540275
												12.1005	0.0534929
												12.1066	0.0529832
												12.1128	0.0525112
												12.1189	0.0521008
												12.1251	0.0517325
												12.1312	0.0513695
												12.1374	0.0509986
												12.1435	0.0506176
												12.1496	0.0502517
												12.1558	0.0498666
												12.1619	0.0495318
												12.1681	0.0491516
												12.1742	0.0487431
												12.1804	0.0483349
												12.1865	0.0480163
												12.1927	0.0476917
												12.1988	0.0474322
												12.2049	0.0471553
												12.2111	0.0468641
												12.2172	0.0465435
												12.2234	0.0462511
												12.2295	0.0459548
												12.2357	0.0456822
												12.2418	0.0453649
												12.2479	0.0450552
												12.2541	0.0447876
												12.2602	0.0445375
												12.2664	0.0443201
												12.2725	0.044128
												12.2787	0.0439261
												12.2848	0.0436849
												12.291	0.0434638
												12.2971	0.0432472
												12.3032	0.0430547
												12.3094	0.0428153
												12.3155	0.0425593
												12.3217	0.0423286
												12.3278	0.0421196
												12.334	0.0419554
												12.3401	0.0418221
												12.3462	0.0416766
												12.3524	0.0414982
												12.3585	0.0413279
												12.3647	0.041144
												12.3708	0.0409938
												12.377	0.0408271
												12.3831	0.0406379
												12.3892	0.040433
												12.3954	0.0402753
												12.4015	0.040137
												12.4077	0.0400489
												12.4138	0.039965
												12.42	0.0398538
												12.4261	0.039712
												12.4323	0.0395814
												12.4384	0.0394604
												12.4445	0.0393351
												12.4507	0.0391818
												12.4568	0.0390133
												12.463	0.0388821
												12.4691	0.038769
												12.4753	0.0386905
												12.4814	0.0386516
												12.4875	0.0386155
												12.4937	0.0385212
												12.4998	0.0384189
												12.506	0.0383159
												12.5121	0.0382279
												12.5183	0.0381208
												12.5244	0.0379776
												12.5306	0.0378516
												12.5367	0.0377648
												12.5428	0.0377194
												12.549	0.0376988
												12.5551	0.0376804
												12.5613	0.0376239
												12.5674	0.037558
												12.5736	0.0374842
												12.5797	0.0374232
												12.5858	0.0373562
												12.592	0.0372535
												12.5981	0.0371356
												12.6043	0.0370608
												12.6104	0.0370098
												12.6166	0.0369853
												12.6227	0.0369664
												12.6289	0.0369276
												12.635	0.0368694
												12.6411	0.0368254
												12.6473	0.0367989
												12.6534	0.0367689
												12.6596	0.0367183
												12.6657	0.0366392
												12.6719	0.0365837
												12.678	0.036553
												12.6841	0.0365379
												12.6903	0.0365398
												12.6964	0.0365335
												12.7026	0.0365272
												12.7087	0.0364903
												12.7149	0.03648
												12.721	0.0364666
												12.7272	0.0364434
												12.7333	0.0363901
												12.7394	0.0363308
												12.7456	0.0362985
												12.7517	0.0362927
												12.7579	0.0363069
												12.764	0.036309
												12.7702	0.0363076
												12.7763	0.0363061
												12.7824	0.0362957
												12.7886	0.0362778
												12.7947	0.0362766
												12.8009	0.0362753
												12.807	0.0362177
												12.8132	0.0361811
												12.8193	0.0361801
												12.8254	0.036192
												12.8316	0.0362225
												12.8377	0.0362272
												12.8439	0.0362295
												12.85	0.0362318
												12.8562	0.0362366
												12.8623	0.0362334
												12.8685	0.0362302
												12.8746	0.0362164
												12.8807	0.0361906
												12.8869	0.0361968
												12.893	0.0362098
												12.8992	0.0362447
												12.9053	0.0362619
												12.9115	0.0362681
												12.9176	0.0362742
												12.9237	0.0362751
												12.9299	0.0362847
												12.936	0.0362891
												12.9422	0.0362692
												12.9483	0.0362493
												12.9545	0.0362297
												12.9606	0.036252
												12.9668	0.0362856
												12.9729	0.0363234
												12.979	0.0363598
												12.9852	0.036374
												12.9913	0.0363773
												12.9975	0.0363859
												13.0036	0.0364094
												13.0098	0.0364092
												13.0159	0.036409
												13.022	0.0364066
												13.0282	0.0364204
												13.0343	0.0364611
												13.0405	0.0365174
												13.0466	0.0365678
												13.0528	0.0365794
												13.0589	0.0365852
												13.0651	0.0365909
												13.0712	0.0366109
												13.0773	0.0366106
												13.0835	0.0366103
												13.0896	0.0366091
												13.0958	0.0366127
												13.1019	0.0366254
												13.1081	0.0366686
												13.1142	0.0367182
												13.1203	0.0367355
												13.1265	0.036742
												13.1326	0.036973
												13.1388	0.036895
												13.1449	0.036817
												13.1511	0.0367952
												13.1572	0.0367818
												13.1633	0.0367699
												13.1695	0.0367788
												13.1756	0.0368214
												13.1818	0.0368904
												13.1879	0.0369368
												13.1941	0.0369535
												13.2002	0.0369702
												13.2064	0.0369976
												13.2125	0.0370372
												13.2186	0.0370592
												13.2248	0.0370604
												13.2309	0.0370605
												13.2371	0.0370759
												13.2432	0.0371063
												13.2494	0.0371672
												13.2555	0.0372447
												13.2616	0.0372773
												13.2678	0.0373088
												13.2739	0.0373371
												13.2801	0.0373607
												13.2862	0.0374014
												13.2924	0.0374022
												13.2985	0.037403
												13.3047	0.037407
												13.3108	0.0374243
												13.3169	0.0374771
												13.3231	0.037556
												13.3292	0.037601
												13.3354	0.037621
												13.3415	0.0376481
												13.3477	0.0376729
												13.3538	0.037705
												13.3599	0.0377178
												13.3661	0.0377306
												13.3722	0.0377394
												13.3784	0.0377736
												13.3845	0.0378083
												13.3907	0.0378693
												13.3968	0.0379478
												13.403	0.0379908
												13.4091	0.0380065
												13.4152	0.0380351
												13.4214	0.0380856
												13.4275	0.0381389
												13.4337	0.0381487
												13.4398	0.0381525
												13.446	0.0381778
												13.4521	0.0382187
												13.4582	0.0382751
												13.4644	0.0383529
												13.4705	0.0384138
												13.4767	0.0384444
												13.4828	0.0384714
												13.489	0.0385255
												13.4951	0.0385924
												13.5013	0.0386302
												13.5074	0.0386422
												13.5135	0.0386611
												13.5197	0.0387086
												13.5258	0.0387686
												13.532	0.0388552
												13.5381	0.0389332
												13.5443	0.0389781
												13.5504	0.0390078
												13.5565	0.0390512
												13.5627	0.0391143
												13.5688	0.0391729
												13.575	0.0391986
												13.5811	0.039231
												13.5873	0.0392821
												13.5934	0.0393355
												13.5995	0.0393963
												13.6057	0.0394718
												13.6118	0.039547
												13.618	0.0395907
												13.6241	0.0396319
												13.6303	0.039677
												13.6364	0.0397408
												13.6426	0.0397849
												13.6487	0.0398118
												13.6548	0.0398564
												13.661	0.0399209
												13.6671	0.0399925
												13.6733	0.0400866
												13.6794	0.0401802
												13.6856	0.0402324
												13.6917	0.0402911
												13.6978	0.0403473
												13.704	0.0404126
												13.7101	0.0404841
												13.7163	0.0405223
												13.7224	0.0405435
												13.7286	0.0406049
												13.7347	0.0406817
												13.7409	0.0407759
												13.747	0.0408686
												13.7531	0.0409388
												13.7593	0.0409935
												13.7654	0.0410586
												13.7716	0.0411298
												13.7777	0.0412025
												13.7839	0.0412601
												13.79	0.0412995
												13.7961	0.041349
												13.8023	0.041415
												13.8084	0.0415104
												13.8146	0.0416196
												13.8207	0.0417138
												13.8269	0.041784
												13.833	0.041862
												13.8392	0.0419281
												13.8453	0.0420067
												13.8514	0.0420869
												13.8576	0.0421432
												13.8637	0.0421972
												13.8699	0.0422637
												13.876	0.0423557
												13.8822	0.0424796
												13.8883	0.042583
												13.8944	0.0426575
												13.9006	0.0427415
												13.9067	0.0428244
												13.9129	0.0429159
												13.919	0.0429951
												13.9252	0.0430643
												13.9313	0.0431249
												13.9374	0.043185
												13.9436	0.0432525
												13.9497	0.0433553
												13.9559	0.0434697
												13.962	0.0435729
												13.9682	0.0436334
												13.9743	0.0437019
												13.9805	0.0437972
												13.9866	0.0438994
												13.9927	0.0439725
												13.9989	0.0440241
												14.005	0.0440918
												14.0112	0.0441623
												14.0173	0.0442638
												14.0235	0.044381
												14.0296	0.044492
												14.0357	0.0445696
												14.0419	0.0446446
												14.048	0.0447288
												14.0542	0.0448304
												14.0603	0.0449252
												14.0665	0.0449808
												14.0726	0.0450349
												14.0788	0.0451382
												14.0849	0.045247
												14.091	0.0453504
												14.0972	0.0454827
												14.1033	0.0455824
												14.1095	0.0456652
												14.1156	0.0457495
												14.1218	0.0458556
												14.1279	0.0459693
												14.134	0.0460459
												14.1402	0.0461023
												14.1463	0.0461891
												14.1525	0.0462809
												14.1586	0.0463965
												14.1648	0.0465196
												14.1709	0.0466316
												14.1771	0.0467257
												14.1832	0.04681
												14.1893	0.0469004
												14.1955	0.0470044
												14.2016	0.0471048
												14.2078	0.0471659
												14.2139	0.0472357
												14.2201	0.0473301
												14.2262	0.0474396
												14.2323	0.047556
												14.2385	0.0476918
												14.2446	0.0478008
												14.2508	0.0479014
												14.2569	0.0479817
												14.2631	0.0480739
												14.2692	0.0481859
												14.2754	0.0482587
												14.2815	0.0483189
												14.2876	0.0484009
												14.2938	0.0485071
												14.2999	0.0486142
												14.3061	0.0487411
												14.3122	0.048839
												14.3184	0.0489426
												14.3245	0.0490376
												14.3306	0.0491361
												14.3368	0.0492432
												14.3429	0.049348
												14.3491	0.0494195
												14.3552	0.0494853
												14.3614	0.0495842
												14.3675	0.0497143
												14.3736	0.0498599
												14.3798	0.0499835
												14.3859	0.0500798
												14.3921	0.0501765
												14.3982	0.050294
												14.4044	0.0503965
												14.4105	0.0505063
												14.4167	0.0505984
												14.4228	0.0506808
												14.4289	0.0507702
												14.4351	0.0508935
												14.4412	0.051035
												14.4474	0.0511693
												14.4535	0.0512639
												14.4597	0.0513563
												14.4658	0.0514686
												14.4719	0.0515742
												14.4781	0.0516887
												14.4842	0.0517787
												14.4904	0.0518482
												14.4965	0.0519413
												14.5027	0.0520607
												14.5088	0.0521806
												14.515	0.052323
												14.5211	0.0524489
												14.5272	0.052563
												14.5334	0.0526628
												14.5395	0.052781
												14.5457	0.0529084
												14.5518	0.0530371
												14.558	0.053135
												14.5641	0.0532314
												14.5702	0.0533468
												14.5764	0.0534733
												14.5825	0.0536147
												14.5887	0.0537573
												14.5948	0.0538899
												14.601	0.0540019
												14.6071	0.0541282
												14.6133	0.0542513
												14.6194	0.0543848
												14.6255	0.0544988
												14.6317	0.0546092
												14.6378	0.0547192
												14.644	0.0548424
												14.6501	0.0549892
												14.6563	0.0551429
												14.6624	0.05529
												14.6685	0.055424
												14.6747	0.0555467
												14.6808	0.0556707
												14.687	0.0558202
												14.6931	0.0559385
												14.6993	0.056041
												14.7054	0.0561528
												14.7115	0.0562955
												14.7177	0.0564422
												14.7238	0.0566197
												14.73	0.0567869
												14.7361	0.0569371
												14.7423	0.0570588
												14.7484	0.0572013
												14.7546	0.0573627
												14.7607	0.0575172
												14.7668	0.0576485
												14.773	0.057769
												14.7791	0.057912
												14.7853	0.0580723
												14.7914	0.0582544
												14.7976	0.0584377
												14.8037	0.0586131
												14.8098	0.05876
												14.816	0.0589115
												14.8221	0.0590664
												14.8283	0.0592431
												14.8344	0.0593944
												14.8406	0.0595334
												14.8467	0.0596774
												14.8529	0.05984
												14.859	0.0600363
												14.8651	0.0602296
												14.8713	0.0604108
												14.8774	0.0605823
												14.8836	0.0607614
												14.8897	0.0609345
												14.8959	0.0611192
												14.902	0.0612986
												14.9081	0.0614712
												14.9143	0.0616146
												14.9204	0.0617897
												14.9266	0.0619834
												14.9327	0.0622108
												14.9389	0.0624314
												14.945	0.0626286
												14.9512	0.0628285
												14.9573	0.0630036
												14.9634	0.0632097
												14.9696	0.0634303
												14.9757	0.063615
												14.9819	0.0637728
												14.988	0.0639625
												14.9942	0.0641804
												15.0003	0.0643982
												15.0064	0.0646411
												15.0126	0.064866
												15.0187	0.0650697
												15.0249	0.065275
												15.031	0.0654995
												15.0372	0.0657177
												15.0433	0.065924
												15.0495	0.066119
												15.0556	0.0663245
												15.0617	0.0665316
												15.0679	0.0667715
												15.074	0.0670069
												15.0802	0.0672727
												15.0863	0.0674966
												15.0925	0.0677297
												15.0986	0.0679618
												15.1047	0.0682108
												15.1109	0.0684576
												15.117	0.0687012
												15.1232	0.0689143
												15.1293	0.069151
												15.1355	0.0693996
												15.1416	0.0696866
												15.1477	0.069954
												15.1539	0.0701955
												15.16	0.0704582
												15.1662	0.0707022
												15.1723	0.0709584
												15.1785	0.0712106
												15.1846	0.0714913
												15.1908	0.0717247
												15.1969	0.071955
												15.203	0.0722293
												15.2092	0.0725172
												15.2153	0.0728092
												15.2215	0.0730942
												15.2276	0.0733862
												15.2338	0.073655
												15.2399	0.0739595
												15.246	0.0742408
												15.2522	0.0745555
												15.2583	0.0748253
												15.2645	0.0751155
												15.2706	0.0754044
												15.2768	0.0757119
												15.2829	0.0760158
												15.2891	0.0763679
												15.2952	0.0766745
[truncated: 1,223 more rows]

## Sheet: T1171I
volume (mL)	Molar Mass 1	volume (mL)	Molar Mass 2	volume (mL)	Molar Mass 3	volume (mL)	Molar Mass 4									volume (mL)	RI
8.55186	391639	9.69873	184220	10.349	135001	16.1448	26034.4									-0.315822	0.000206004
8.55698	389868	9.70385	183537	10.3541	134800	16.1499	26057.1									-0.310556	0.000195448
8.5621	388689	9.70897	182975	10.3592	134565	16.155	25980.5									-0.30529	0.00018377
8.56722	387209	9.71409	182419	10.3643	134360	16.1601	25862.3									-0.300024	0.000169108
8.57234	385574	9.71921	181795	10.3695	134134	16.1653	25764.4									-0.294758	0.000147029
8.57746	383372	9.72433	181175	10.3746	133933	16.1704	25661.1									-0.289492	0.000124549
8.58258	381983	9.72945	180636	10.3797	133680	16.1755	25578.1									-0.284226	0.000114491
8.5877	380659	9.73457	180088	10.3848	133483	16.1806	25471.6									-0.27896	0.000105166
8.59282	379542	9.73969	179459	10.3899	133287	16.1857	25381.9									-0.273694	9.56726e-05
8.59794	377882	9.74481	178805	10.3951	133141	16.1909	25322.3									-0.268428	9.57583e-05
8.60306	376206	9.74993	178203	10.4002	132951	16.196	25238.9									-0.263162	9.5844e-05
8.60818	374743	9.75505	177666	10.4053	132778	16.2011	25136									-0.257896	9.22838e-05
8.6133	372871	9.76017	177111	10.4104	132487	16.2062	25061.3									-0.25263	8.73552e-05
8.61842	371290	9.76529	176577	10.4155	132216	16.2113	25018.2									-0.247364	8.28102e-05
8.62354	369651	9.77041	176092	10.4207	132066	16.2165	24972.9									-0.242098	7.50005e-05
8.62866	367980	9.77553	175690	10.4258	131874	16.2216	24894.9									-0.236832	7.4405e-05
8.63378	366650	9.78065	175205	10.4309	131663	16.2267	24816.2									-0.231566	6.9312e-05
8.6389	365607	9.78577	174630	10.436	131461	16.2318	24722.9									-0.2263	5.6193e-05
8.64402	364445	9.79089	174056	10.4411	131292	16.2369	24628									-0.221034	4.52206e-05
8.64914	362855	9.79601	173521	10.4463	131120	16.2421	24522.9									-0.215768	4.00459e-05
8.65426	361321	9.80113	172999	10.4514	130981	16.2472	24435.2									-0.210502	3.94114e-05
8.65938	359984	9.80625	172532	10.4565	130867	16.2523	24332									-0.205236	3.23579e-05
8.6645	359032	9.81137	171947	10.4616	130743	16.2574	24242.3									-0.19997	3.32247e-05
8.66962	357793	9.81649	171421	10.4667	130575	16.2625	24136.9									-0.194704	3.30667e-05
8.67474	355837	9.82161	170913	10.4718	130384	16.2677	24062.2									-0.189438	2.55474e-05
8.67986	353583	9.82673	170368	10.477	130200	16.2728	23994.8									-0.184172	2.00974e-05
8.68498	351605	9.83185	169907	10.4821	130014	16.2779	23901.9									-0.178906	1.51937e-05
8.6901	350124	9.83697	169408	10.4872	129881	16.283	23823.2									-0.17364	1.03603e-05
8.69522	348519	9.84209	168890	10.4923	129737	16.2881	23749.4									-0.168374	1.24649e-05
8.70034	347049	9.84721	168410	10.4974	129582	16.2933	23672.9									-0.163108	1.32351e-05
8.70546	345323	9.85233	168180	10.5026	129388	16.2984	23573.9									-0.157842	1.40053e-05
8.71058	344132	9.85745	168071	10.5077	129154	16.3035	23504.8									-0.152576	8.20493e-06
8.7157	342562	9.86257	167838	10.5128	128921	16.3086	23411.8									-0.14731	7.52042e-06
8.72082	341401	9.86769	167397	10.5179	128703	16.3137	23345.2									-0.142044	1.7489e-05
8.72594	339891	9.87281	166993	10.523	128502	16.3189	23267.2									-0.136778	2.27002e-05
8.73106	338669	9.87793	166470	10.5282	128323	16.324	23194.2									-0.131512	3.05456e-05
8.73618	337121	9.88305	165929	10.5333	128155	16.3291	23110.8									-0.126246	4.58365e-05
8.7413	335870	9.88817	165356	10.5384	127969	16.3342	23046.4									-0.12098	5.41132e-05
8.74642	334277	9.89329	164845	10.5435	127807	16.3393	22975									-0.115714	6.14317e-05
8.75154	332972	9.89841	164383	10.5486	127634	16.3445	22911.4									-0.110448	6.93198e-05
8.75666	331396	9.90353	163896	10.5538	127488	16.3496	22846.6									-0.105182	7.75438e-05
8.76178	330102	9.90865	163423	10.5589	127316	16.3547	22783.6									-0.0999164	8.47915e-05
8.7669	328876	9.91377	163003	10.564	127162	16.3598	22723.3									-0.0946504	9.46581e-05
8.77202	327747	9.91889	162652	10.5691	126973	16.3649	22657.2									-0.0893845	9.93961e-05
8.77714	326736	9.92401	162303	10.5742	126795	16.3701	22586.9									-0.0841185	0.000101823
8.78226	325480	9.92913	161818	10.5794	126595	16.3752	22519.9									-0.0788525	0.000104249
8.78738	324120	9.93425	161291	10.5845	126417	16.3803	22459.6									-0.0735865	0.000105799
8.7925	323005	9.93937	160762	10.5896	126247	16.3854	22399.1									-0.0683205	0.000116169
8.79762	321958	9.94449	160256	10.5947	126067	16.3905	22335.9									-0.0630545	0.000122046
8.80274	320665	9.94961	159729	10.5998	125907	16.3957	22272.6									-0.0577886	0.000129623
8.80786	319482	9.95473	159104	10.605	125770	16.4008	22212.5									-0.0525226	0.000131993
8.81298	318285			10.6101	125627	16.4059	22156.2									-0.0472566	0.000134362
8.8181	317013			10.6152	125461	16.411	22100.2									-0.0419906	0.000134588
8.82322	315718			10.6203	125282	16.4161	22048.9									-0.0367246	0.000134815
8.82834	314551			10.6254	125091	16.4213	22002.1									-0.0314586	0.000134054
8.83346	313515			10.6306	124907	16.4264	21958.8									-0.0261926	0.00013419
8.83858	312357			10.6357	124719	16.4315	21905.6									-0.0209267	0.000134326
8.8437	311163			10.6408	124566	16.4366	21851.8									-0.0156607	0.000127197
8.84882	310159			10.6459	124418	16.4417	21808.5									-0.0103947	0.000118864
8.85394	309159			10.651	124278	16.4469	21769.7									-0.00512871	0.000109101
8.85906	308098			10.6562	124124	16.452	21717.6									0.000137272	0.000103614
8.86418	306994			10.6613	123958	16.4571	21660.3									0.00540326	0.000102849
8.8693	305930			10.6664	123769	16.4622	21615.9									0.0106692	0.000102716
8.87442	304690			10.6715	123564	16.4673	21580.3									0.0159352	0.000102583
8.87954	303612			10.6766	123361	16.4725	21532.2									0.0212012	0.000100774
8.88466	302498			10.6818	123177	16.4776	21487									0.0264672	9.90124e-05
8.88978	301439			10.6869	123006	16.4827	21437									0.0317332	9.76339e-05
8.8949	300329			10.692	122815	16.4878	21394.6									0.0369992	9.62554e-05
8.90002	299379			10.6971	122627	16.4929	21346.1									0.0422651	9.34226e-05
8.90514	298330			10.7022	122438	16.4981	21307.2									0.0475311	9.42172e-05
8.91026	297339			10.7074	122226	16.5032	21267.1									0.0527971	9.50119e-05
8.91538	296303			10.7125	122025	16.5083	21233.7									0.0580631	8.55144e-05
8.9205	295383			10.7176	121835	16.5134	21196.7									0.0633291	7.37945e-05
8.92562	294409			10.7227	121650	16.5185	21158.1									0.0685951	7.1488e-05
8.93074	293515			10.7278	121450	16.5237	21118.9									0.0738611	7.18739e-05
8.93586	292614			10.733	121239	16.5288	21079.5									0.079127	7.72383e-05
8.94098	291726			10.7381	121035	16.5339	21044.6									0.084393	7.86297e-05
8.9461	290774			10.7432	120853	16.539	21011.9									0.089659	7.86389e-05
8.95122	289761			10.7483	120656	16.5441	20971.8									0.094925	7.8648e-05
8.95634	288750			10.7534	120457	16.5493	20929.6									0.100191	7.61904e-05
8.96146	287751			10.7586	120294	16.5544	20891.6									0.105457	7.23822e-05
8.96658	286793			10.7637	120129	16.5595	20853.9									0.110723	6.30693e-05
8.9717	285824			10.7688	119955	16.5646	20822.2									0.115989	5.64967e-05
8.97682	284892			10.7739	119766	16.5697	20791.1									0.121255	4.94071e-05
8.98194	283986			10.779	119568	16.5749	20765.1									0.126521	4.00814e-05
8.98706	283096			10.7842	119403	16.58	20732.6									0.131787	2.80511e-05
8.99218	282233			10.7893	119263	16.5851	20703.8									0.137053	1.94759e-05
8.9973	281343			10.7944	119118	16.5902	20671.3									0.142319	1.95843e-05
9.00242	280436			10.7995	118986	16.5953	20640.1									0.147585	2.405e-05
9.00754	279597			10.8046	118765	16.6005	20626.3									0.152851	2.80988e-05
9.01266	278737			10.8098	118533	16.6056	20610.5									0.158117	2.87759e-05
9.01778	277841			10.8149	118321	16.6107	20592.6									0.163383	2.94531e-05
9.0229	276964			10.82	118128	16.6158	20582.7									0.168649	2.97294e-05
9.02802	276129			10.8251	117936	16.6209	20566.7									0.173915	2.70284e-05
9.03314	275234			10.8302	117765	16.6261	20540.2									0.179181	2.64729e-05
9.03826	274316			10.8354	117589	16.6312	20505									0.184447	2.78479e-05
9.04338	273372			10.8405	117417	16.6363	20489.9									0.189713	2.84206e-05
9.0485	272522			10.8456	117196	16.6414	20454.4									0.194979	2.89933e-05
9.05362	271718			10.8507	116990	16.6465	20438.6									0.200245	2.49029e-05
9.05874	270877			10.8558	116817	16.6517	20419.5									0.205511	2.23372e-05
9.06386	270058			10.861	116564	16.6568	20421.7									0.210777	2.08544e-05
9.06898	269239			10.8661	116279	16.6619	20404.8									0.216043	2.12521e-05
9.0741	268473			10.8712	116041	16.667	20382.2									0.221309	2.76386e-05
9.07922	267708			10.8763	115865	16.6721	20343.7									0.226575	2.95687e-05
9.08434	266982			10.8814	115741	16.6773	20327.3									0.231841	3.07375e-05
9.08946	266195			10.8866	115555	16.6824	20295.3									0.237107	3.03105e-05
9.09458	265387			10.8917	115322	16.6875	20278.1									0.242373	2.98836e-05
9.0997	264539			10.8968	115101	16.6926	20243.8									0.247639	2.81809e-05
9.10482	263809			10.9019	114862	16.6977	20204.5									0.252905	2.85236e-05
9.10994	263030			10.907	114609	16.7029	20176.2									0.258171	2.88662e-05
9.11506	262153			10.9122	114410	16.708	20155									0.263436	2.74951e-05
9.12018	261370			10.9173	114201	16.7131	20129.9									0.268702	1.86309e-05
9.1253	260623			10.9224	113946	16.7182	20098.2									0.273968	1.19384e-05
9.13042	259816					16.7233	20099.9									0.279234	1.11315e-05
9.13554	258986					16.7285	20085.6									0.2845	1.24324e-05
9.14066	258261					16.7336	20061.2									0.289766	1.91973e-05
9.14578	257513					16.7387	20020.8									0.295032	2.39256e-05
9.1509	256758					16.7438	19998.9									0.300298	2.59881e-05
9.15602	255958					16.7489	19978.1									0.305564	2.51683e-05
9.16114	255210					16.7541	19953.7									0.31083	2.43485e-05
9.16626	254418					16.7592	19935.1									0.316096	2.48683e-05
9.17138	253567					16.7643	19764.5									0.321362	2.77313e-05
9.1765	252812															0.326628	2.81099e-05
9.18162	252087															0.331894	2.84884e-05
9.18674	251294															0.33716	2.60538e-05
9.19186	250517															0.342426	2.36926e-05
9.19698	249769															0.347692	2.46216e-05
9.2021	249032															0.352958	2.55507e-05
9.20722	248320															0.358224	2.81276e-05
9.21234	247619															0.36349	4.06366e-05
9.21746	246894															0.368756	4.42659e-05
9.22258	246183															0.374022	4.50439e-05
9.2277	245502															0.379288	4.58219e-05
9.23282	244855															0.384554	4.55304e-05
9.23794	244162															0.38982	4.34286e-05
9.24306	243430															0.395086	4.37202e-05
9.24818	242631															0.400352	4.40118e-05
9.2533	241839															0.405618	4.11705e-05
9.25842	241043															0.410884	3.05086e-05
9.26354	240329															0.41615	3.05996e-05
9.26866	239626															0.421416	3.43245e-05
9.27378	239024															0.426682	3.58169e-05
9.2789	238354															0.431948	4.24265e-05
9.28402	237704															0.437214	4.5987e-05
9.28914	237096															0.44248	4.68806e-05
9.29426	236506															0.447746	4.77741e-05
9.29938	235874															0.453012	4.80687e-05
9.3045	235176															0.458278	4.59815e-05
9.30962	234553															0.463544	4.72289e-05
9.31474	233873															0.46881	4.61432e-05
9.31986	233181															0.474076	4.50575e-05
9.32498	232359															0.479342	3.14977e-05
9.3301	231591															0.484608	2.60851e-05
9.33522	230837															0.489874	2.4923e-05
9.34034	230033															0.49514	2.37609e-05
9.34546	229280															0.500406	2.30895e-05
9.35058	228605															0.505672	2.37807e-05
9.3557	227990															0.510938	2.44718e-05
9.36082	227354															0.516204	2.49251e-05
9.36594	226708															0.52147	2.28833e-05
9.37106	225937															0.526736	2.05718e-05
9.37618	225183															0.532002	2.12142e-05
9.3813	224445															0.537268	2.17566e-05
9.38642	223709															0.542534	2.22989e-05
9.39154	222950															0.5478	2.10158e-05
9.39666	222151															0.553066	2.16985e-05
9.40178	221439															0.558332	2.30711e-05
																0.563598	2.54257e-05
																0.568864	3.43843e-05
																0.57413	4.01774e-05
																0.579396	4.3102e-05
																0.584662	4.53945e-05
																0.589928	4.67726e-05
																0.595194	4.74613e-05
																0.600459	4.81499e-05
																0.605725	4.8346e-05
																0.610991	4.8542e-05
																0.616257	4.5393e-05
																0.621523	3.55587e-05
																0.626789	3.91354e-05
																0.632055	4.22578e-05
																0.637321	4.38149e-05
																0.642587	4.92187e-05
																0.647853	5.22529e-05
																0.653119	5.52871e-05
																0.658385	5.66483e-05
																0.663651	5.74888e-05
																0.668917	5.83294e-05
																0.674183	6.22306e-05
																0.679449	6.47763e-05
																0.684715	6.48563e-05
																0.689981	6.49364e-05
																0.695247	6.23668e-05
																0.700513	6.53071e-05
																0.705779	7.69848e-05
																0.711045	8.82381e-05
																0.716311	9.91763e-05
																0.721577	0.000102201
																0.726843	0.00010303
																0.732109	0.00010386
																0.737375	0.000103868
																0.742641	0.000103466
																0.747907	0.000104237
																0.753173	0.000105007
																0.758439	9.61274e-05
																0.763705	8.71843e-05
																0.768971	8.27495e-05
																0.774237	8.7289e-05
																0.779503	9.65666e-05
																0.784769	0.000104852
																0.790035	0.000108632
																0.795301	0.000111336
																0.800567	0.000112266
																0.805833	0.000113197
																0.811099	0.000113794
																0.816365	0.000114544
																0.821631	0.000115295
																0.826897	0.000112863
																0.832163	0.00010817
																0.837429	0.000107533
																0.842695	0.000105262
																0.847961	0.00011035
																0.853227	0.000120816
																0.858493	0.000128072
																0.863759	0.000127796
																0.869025	0.000127521
																0.874291	0.000125854
																0.879557	0.000125387
																0.884823	0.00012538
																0.890089	0.000125373
																0.895355	0.00011745
																0.900621	0.000109092
																0.905887	0.000103555
																0.911153	0.000102372
																0.916419	9.96525e-05
																0.921685	0.000100456
																0.926951	0.000107441
																0.932217	0.000107818
																0.937483	0.000108196
																0.942748	0.000107654
																0.948014	0.000106494
																0.95328	0.000109127
																0.958546	0.000110223
																0.963812	0.000106236
																0.969078	0.00010225
																0.974344	9.83332e-05
																0.97961	0.000100611
																0.984876	0.000104189
																0.990142	0.000110523
																0.995408	0.000114639
																1.00067	0.000116138
																1.00594	0.000116164
																1.01121	0.00011619
																1.01647	0.000115859
																1.02174	0.000116788
																1.027	0.000117898
																1.03227	0.000118196
																1.03754	0.000118495
																1.0428	0.000115224
																1.04807	0.000116521
																1.05333	0.000117818
																1.0586	0.000119296
																1.06387	0.000127707
																1.06913	0.000130693
																1.0744	0.000132466
																1.07966	0.000133109
																1.08493	0.000133753
																1.0902	0.000133266
																1.09546	0.00013291
																1.10073	0.000132554
																1.10599	0.000129729
																1.11126	0.000114217
																1.11653	0.000111495
																1.12179	0.000111966
																1.12706	0.000106648
																1.13232	0.000108508
																1.13759	0.000109514
																1.14286	0.00011052
																1.14812	0.000105515
																1.15339	0.000105647
																1.15865	0.000101954
																1.16392	9.89148e-05
																1.16919	9.58137e-05
																1.17445	9.27126e-05
																1.17972	7.92579e-05
																1.18498	7.22611e-05
																1.19025	6.75332e-05
																1.19552	6.14704e-05
																1.20078	6.13327e-05
																1.20605	6.20778e-05
																1.21131	6.28229e-05
																1.21658	6.22459e-05
																1.22185	5.65294e-05
																1.22711	4.99753e-05
																1.23238	4.73985e-05
																1.23764	4.74206e-05
																1.24291	4.71667e-05
																1.24818	4.09932e-05
																1.25344	3.14837e-05
																1.25871	2.70269e-05
																1.26397	2.61487e-05
																1.26924	2.52704e-05
																1.27451	2.41956e-05
																1.27977	2.24782e-05
																1.28504	1.78113e-05
																1.2903	1.015e-05
																1.29557	-6.08551e-07
																1.30084	-5.14939e-06
																1.3061	-4.98446e-06
																1.31137	-5.9438e-06
																1.31663	-6.90315e-06
																1.3219	-2.0571e-05
																1.32717	-2.93142e-05
																1.33243	-2.92685e-05
																1.3377	-2.80979e-05
																1.34296	-2.69398e-05
																1.34823	-2.74544e-05
																1.3535	-2.79689e-05
																1.35876	-3.2721e-05
																1.36403	-3.71298e-05
																1.36929	-4.7362e-05
																1.37456	-5.1959e-05
																1.37983	-5.30155e-05
																1.38509	-6.27953e-05
																1.39036	-7.69384e-05
																1.39562	-8.53951e-05
																1.40089	-9.08399e-05
																1.40616	-9.1044e-05
																1.41142	-9.09802e-05
																1.41669	-9.09164e-05
																1.42195	-9.33918e-05
																1.42722	-9.58418e-05
																1.43249	-9.7131e-05
																1.43775	-9.84202e-05
																1.44302	-0.000101567
																1.44828	-0.000103254
																1.45355	-0.000104689
																1.45881	-0.000113995
																1.46408	-0.000124026
																1.46935	-0.000130761
																1.47461	-0.000129677
																1.47988	-0.000127817
																1.48514	-0.000126632
																1.49041	-0.000126323
																1.49568	-0.000126014
																1.50094	-0.000130858
																1.50621	-0.000129845
																1.51147	-0.000131966
																1.51674	-0.000133637
																1.52201	-0.000135066
																1.52727	-0.00014046
																1.53254	-0.000146687
																1.5378	-0.000149854
																1.54307	-0.000150818
																1.54834	-0.000150266
																1.5536	-0.000142675
																1.55887	-0.00013972
																1.56413	-0.000138327
																1.5694	-0.000137812
																1.57467	-0.000137297
																1.57993	-0.000135613
																1.5852	-0.000134641
																1.59046	-0.000133669
																1.59573	-0.000138132
																1.601	-0.000142236
																1.60626	-0.000148605
																1.61153	-0.000148497
																1.61679	-0.00014171
																1.62206	-0.000136615
																1.62733	-0.000134009
																1.63259	-0.000133094
																1.63786	-0.000132178
																1.64312	-0.000131997
																1.64839	-0.000131045
																1.65366	-0.000130093
																1.65892	-0.000129623
																1.66419	-0.000133383
																1.66945	-0.000137832
																1.67472	-0.000141298
																1.67999	-0.000142629
																1.68525	-0.000140872
																1.69052	-0.000137441
																1.69578	-0.000132543
																1.70105	-0.000130484
																1.70632	-0.000131466
																1.71158	-0.000132448
																1.71685	-0.00013099
																1.72211	-0.000128909
																1.72738	-0.000123648
																1.73265	-0.000122345
																1.73791	-0.000121484
																1.74318	-0.000120624
																1.74844	-0.000116776
																1.75371	-0.000115075
																1.75898	-0.00011053
																1.76424	-9.76908e-05
																1.76951	-9.26123e-05
																1.77477	-8.98233e-05
																1.78004	-8.89183e-05
																1.78531	-8.80134e-05
																1.79057	-8.34864e-05
																1.79584	-7.68861e-05
																1.8011	-7.73721e-05
																1.80637	-7.78581e-05
																1.81164	-8.16607e-05
																1.8169	-8.5222e-05
																1.82217	-8.3642e-05
																1.82743	-8.20621e-05
																1.8327	-7.98051e-05
																1.83797	-6.6888e-05
																1.84323	-6.62384e-05
																1.8485	-6.55888e-05
																1.85376	-6.6958e-05
																1.85903	-6.41954e-05
																1.8643	-6.09055e-05
																1.86956	-5.99772e-05
																1.87483	-5.90489e-05
																1.88009	-6.49016e-05
																1.88536	-6.87203e-05
																1.89063	-6.99165e-05
																1.89589	-6.86954e-05
																1.90116	-6.31374e-05
																1.90642	-5.89673e-05
																1.91169	-5.72539e-05
																1.91696	-5.75337e-05
																1.92222	-5.78134e-05
																1.92749	-6.08689e-05
																1.93275	-6.24426e-05
																1.93802	-6.12837e-05
																1.94329	-6.10928e-05
																1.94855	-6.09018e-05
																1.95382	-6.88168e-05
																1.95908	-6.98555e-05
																1.96435	-6.75942e-05
																1.96962	-6.5333e-05
																1.97488	-5.99793e-05
																1.98015	-5.16362e-05
																1.98541	-4.8528e-05
																1.99068	-4.65273e-05
																1.99595	-4.45266e-05
																2.00121	-4.32672e-05
																2.00648	-3.3226e-05
																2.01174	-3.05389e-05
																2.01701	-2.94382e-05
																2.02228	-2.98545e-05
																2.02754	-3.02708e-05
																2.03281	-2.33701e-05
																2.03807	-1.6687e-05
																2.04334	-4.69679e-06
																2.04861	7.99124e-06
																2.05387	1.06487e-05
																2.05914	1.17082e-05
																2.0644	1.27678e-05
																2.06967	1.35351e-05
																2.07494	1.1364e-05
																2.0802	1.18381e-05
																2.08547	1.23122e-05
																2.09073	1.46356e-06
																2.096	-7.48833e-06
																2.10127	-1.33645e-05
																2.10653	-1.46951e-05
																2.1118	-1.31774e-05
																2.11706	-6.82336e-06
																2.12233	-5.49354e-06
																2.12759	-5.06681e-06
																2.13286	-4.64008e-06
																2.13813	-4.98207e-06
																2.14339	-8.67614e-06
																2.14866	-7.19167e-06
																2.15392	-5.95488e-06
																2.15919	-6.28677e-06
																2.16446	-6.61866e-06
																2.16972	-7.86007e-06
																2.17499	-4.69505e-06
																2.18025	5.91934e-06
																2.18552	1.70426e-05
																2.19079	2.00792e-05
																2.19605	2.13822e-05
																2.20132	2.26852e-05
																2.20658	2.39918e-05
																2.21185	2.50075e-05
																2.21712	2.60232e-05
																2.22238	2.59353e-05
																2.22765	2.58474e-05
																2.23291	1.4911e-05
																2.23818	1.21688e-05
																2.24345	1.39471e-05
																2.24871	1.50943e-05
																2.25398	1.81618e-05
																2.25924	2.0145e-05
																2.26451	1.69557e-05
																2.26978	1.37664e-05
																2.27504	1.07059e-05
																2.28031	8.55321e-06
																2.28557	6.18549e-06
																2.29084	4.17189e-06
																2.29611	-1.6489e-06
																2.30137	-9.08901e-06
																2.30664	-1.42636e-05
																2.3119	-2.02483e-05
																2.31717	-2.41065e-05
																2.32244	-2.3221e-05
																2.3277	-2.29296e-05
																2.33297	-2.38875e-05
																2.33823	-2.97191e-05
																2.3435	-3.49565e-05
																2.34877	-3.42535e-05
																2.35403	-3.35506e-05
																2.3593	-3.36785e-05
																2.36456	-3.89524e-05
																2.36983	-5.07041e-05
																2.3751	-5.81516e-05
																2.38036	-7.07989e-05
																2.38563	-7.53138e-05
																2.39089	-7.91709e-05
																2.39616	-7.96133e-05
																2.40143	-8.2438e-05
																2.40669	-8.52626e-05
																2.41196	-9.62008e-05
																2.41722	-0.000101536
																2.42249	-0.000105051
																2.42776	-0.000111562
																2.43302	-0.000116635
																2.43829	-0.000129368
																2.44355	-0.000143349
																2.44882	-0.000151769
																2.45409	-0.000157536
																2.45935	-0.000160967
																2.46462	-0.000157662
																2.46988	-0.000154719
																2.47515	-0.000153742
																2.48042	-0.000152765
																2.48568	-0.00015632
																2.49095	-0.000157111
																2.49621	-0.000156216
																2.50148	-0.000155322
																2.50675	-0.00016285
																2.51201	-0.000174769
																2.51728	-0.000185036
																2.52254	-0.000192275
																2.52781	-0.000198636
																2.53308	-0.000197899
																2.53834	-0.000200331
																2.54361	-0.000202763
																2.54887	-0.000210726
																2.55414	-0.000213946
																2.55941	-0.000223215
																2.56467	-0.000231089
																2.56994	-0.000230956
																2.5752	-0.000230823
																2.58047	-0.000235037
																2.58574	-0.000241189
																2.591	-0.000247607
																2.59627	-0.000248498
																2.60153	-0.00024948
																2.6068	-0.000248782
																2.61207	-0.000248085
																2.61733	-0.000248342
																2.6226	-0.000253161
																2.62786	-0.000257096
																2.63313	-0.000265151
																2.6384	-0.00026694
																2.64366	-0.000272702
																2.64893	-0.000278464
																2.65419	-0.000291842
																2.65946	-0.000301441
																2.66473	-0.000305834
																2.66999	-0.000310195
																2.67526	-0.000311795
																2.68052	-0.000311465
																2.68579	-0.000311134
																2.69106	-0.000312436
																2.69632	-0.000318413
																2.70159	-0.000325687
																2.70685	-0.000324835
																2.71212	-0.000327003
																2.71739	-0.00032917
																2.72265	-0.000334855
																2.72792	-0.000341113
																2.73318	-0.00034231
																2.73845	-0.000345376
																2.74372	-0.000343159
																2.74898	-0.000342041
																2.75425	-0.000341461
																2.75951	-0.000340881
																2.76478	-0.000351098
																2.77005	-0.000360735
																2.77531	-0.000360922
																2.78058	-0.000361956
																2.78584	-0.000362989
																2.79111	-0.000366718
																2.79638	-0.000374461
																2.80164	-0.000374296
																2.80691	-0.000373859
																2.81217	-0.000370378
																2.81744	-0.00036012
																2.8227	-0.000355615
																2.82797	-0.000353182
																2.83324	-0.000350749
																2.8385	-0.000345416
																2.84377	-0.000341067
																2.84903	-0.000338578
																2.8543	-0.000336895
																2.85957	-0.000339818
																2.86483	-0.000342741
																2.8701	-0.000342637
																2.87536	-0.000336916
																2.88063	-0.000332078
																2.8859	-0.000324555
																2.89116	-0.00032201
																2.89643	-0.000320342
																2.90169	-0.000318673
																2.90696	-0.00031687
																2.91223	-0.000315544
																2.91749	-0.000313371
																2.92276	-0.000312332
																2.92802	-0.000311293
																2.93329	-0.000316285
																2.93856	-0.000320475
																2.94382	-0.000325023
																2.94909	-0.000326625
																2.95435	-0.000321981
																2.95962	-0.000322601
																2.96489	-0.000323221
																2.97015	-0.000326442
																2.97542	-0.000329523
																2.98068	-0.000329634
																2.98595	-0.000330632
																2.99122	-0.000329864
																2.99648	-0.000330765
																3.00175	-0.000331667
																3.00701	-0.000334884
																3.01228	-0.000341848
																3.01755	-0.000339786
																3.02281	-0.000332159
																3.02808	-0.000331063
																3.03334	-0.000330693
																3.03861	-0.000330323
																3.04388	-0.000333563
																3.04914	-0.000333042
																3.05441	-0.000333754
																3.05967	-0.000334288
																3.06494	-0.000334822
																3.07021	-0.000338142
																3.07547	-0.000341046
																3.08074	-0.000343329
																3.086	-0.000343914
																3.09127	-0.000344822
																3.09654	-0.000339234
																3.1018	-0.00032939
																3.10707	-0.000327331
																3.11233	-0.000325271
																3.1176	-0.000324032
																3.12287	-0.00031718
																3.12813	-0.000306507
																3.1334	-0.000305019
																3.13866	-0.000303895
																3.14393	-0.000303566
																3.1492	-0.000303236
																3.15446	-0.000302336
																3.15973	-0.000298422
																3.16499	-0.000293162
																3.17026	-0.000282015
																3.17553	-0.00027635
																3.18079	-0.000274216
																3.18606	-0.000268227
																3.19132	-0.000264239
																3.19659	-0.000260448
																3.20186	-0.000257653
																3.20712	-0.000257107
																3.21239	-0.00025656
																3.21765	-0.000256646
																3.22292	-0.000256066
																3.22819	-0.000254799
																3.23345	-0.000248351
																3.23872	-0.000236026
																3.24398	-0.00022938
																3.24925	-0.000227029
																3.25452	-0.000224677
																3.25978	-0.000221674
																3.26505	-0.0002186
																3.27031	-0.0002149
																3.27558	-0.000213905
																3.28085	-0.00021291
																3.28611	-0.000217073
																3.29138	-0.000217356
																3.29664	-0.000216012
																3.30191	-0.00021262
																3.30718	-0.000206861
																3.31244	-0.00020249
																3.31771	-0.000202725
																3.32297	-0.00020296
																3.32824	-0.000204909
																3.33351	-0.000207524
																3.33877	-0.00020481
																3.34404	-0.000204745
																3.3493	-0.00020468
																3.35457	-0.000213718
																3.35984	-0.000217844
																3.3651	-0.000215569
																3.37037	-0.000213294
																3.37563	-0.000209934
																3.3809	-0.000201563
																3.38617	-0.000200868
																3.39143	-0.000200173
																3.3967	-0.000200176
																3.40196	-0.000198707
																3.40723	-0.000194736
																3.4125	-0.00019196
																3.41776	-0.000191014
																3.42303	-0.000190068
																3.42829	-0.000192321
																3.43356	-0.000183399
																3.43883	-0.000173806
																3.44409	-0.000167869
																3.44936	-0.000155132
																3.45462	-0.000146988
																3.45989	-0.000142595
																3.46516	-0.000138433
																3.47042	-0.000137037
																3.47569	-0.000133855
																3.48095	-0.000126672
																3.48622	-0.000122697
																3.49148	-0.000123946
																3.49675	-0.000125195
																3.50202	-0.000121989
																3.50728	-0.000117524
																3.51255	-0.000109617
																3.51781	-0.000100293
																3.52308	-9.34256e-05
																3.52835	-9.07731e-05
																3.53361	-8.94185e-05
																3.53888	-8.99349e-05
																3.54414	-9.04514e-05
																3.54941	-8.80537e-05
																3.55468	-8.69848e-05
																3.55994	-8.69303e-05
																3.56521	-8.68758e-05
																3.57047	-8.42637e-05
																3.57574	-7.95204e-05
																3.58101	-7.39614e-05
																3.58627	-6.57476e-05
																3.59154	-6.13778e-05
																3.5968	-5.91152e-05
																3.60207	-5.68526e-05
																3.60734	-5.47266e-05
																3.6126	-5.33866e-05
																3.61787	-5.21947e-05
																3.62313	-5.10769e-05
																3.6284	-5.27189e-05
																3.63367	-5.4361e-05
																3.63893	-5.85903e-05
																3.6442	-6.09454e-05
																3.64946	-5.8858e-05
																3.65473	-5.15775e-05
																3.66	-5.14032e-05
																3.66526	-5.1229e-05
																3.67053	-5.2318e-05
																3.67579	-5.08977e-05
																3.68106	-4.90099e-05
																3.68633	-4.71222e-05
																3.69159	-4.61313e-05
																3.69686	-4.51404e-05
																3.70212	-4.43116e-05
																3.70739	-4.4747e-05
																3.71266	-4.87313e-05
																3.71792	-5.16915e-05
																3.72319	-4.35338e-05
																3.72845	-3.84281e-05
																3.73372	-3.55779e-05
																3.73899	-3.58242e-05
																3.74425	-3.60706e-05
																3.74952	-3.67964e-05
																3.75478	-3.66995e-05
																3.76005	-3.57836e-05
																3.76532	-3.55138e-05
																3.77058	-3.5244e-05
																3.77585	-3.68594e-05
																3.78111	-3.93139e-05
																3.78638	-3.83398e-05
																3.79165	-3.73657e-05
																3.79691	-3.07605e-05
																3.80218	-2.98047e-05
																3.80744	-2.88488e-05
																3.81271	-2.931e-05
																3.81798	-2.46194e-05
																3.82324	-2.33663e-05
																3.82851	-2.27853e-05
																3.83377	-2.22044e-05
																3.83904	-2.22956e-05
																3.84431	-3.13408e-05
																3.84957	-3.63236e-05
																3.85484	-3.49005e-05
																3.8601	-3.34774e-05
																3.86537	-2.82765e-05
																3.87064	-1.72665e-05
																3.8759	-1.5765e-05
																3.88117	-1.42636e-05
																3.88643	-1.26554e-05
																3.8917	-1.10472e-05
																3.89697	-8.55075e-06
																3.90223	-8.04539e-06
																3.9075	-7.54003e-06
																3.91276	-9.84895e-06
																3.91803	-1.44229e-05
																3.9233	-1.50716e-05
																3.92856	-1.85158e-05
																3.93383	-2.02459e-05
																3.93909	-1.73641e-05
																3.94436	-1.54158e-05
																3.94963	-1.77305e-05
																3.95489	-2.00451e-05
																3.96016	-2.57756e-05
																3.96542	-2.78276e-05
																3.97069	-3.04515e-05
																3.97596	-3.36255e-05
																3.98122	-4.15174e-05
																3.98649	-5.61837e-05
																3.99175	-6.4673e-05
																3.99702	-6.95385e-05
																4.00229	-7.42921e-05
																4.00755	-7.5258e-05
																4.01282	-7.35141e-05
																4.01808	-7.23047e-05
																4.02335	-7.3859e-05
																4.02862	-7.54133e-05
																4.03388	-7.89002e-05
																4.03915	-7.65905e-05
																4.04441	-7.62552e-05
																4.04968	-7.59199e-05
																4.05495	-8.51908e-05
																4.06021	-9.11038e-05
																4.06548	-9.1279e-05
																4.07074	-9.37925e-05
																4.07601	-9.29701e-05
																4.08128	-9.09413e-05
																4.08654	-9.04941e-05
																4.09181	-9.00469e-05
																4.09707	-9.69951e-05
																4.10234	-0.000101061
																4.10761	-0.000104463
																4.11287	-0.000104363
																4.11814	-0.000107533
																4.1234	-0.000123499
																4.12867	-0.000135369
																4.13394	-0.000136911
																4.1392	-0.000140303
																4.14447	-0.000141178
																4.14973	-0.000136145
																4.155	-0.000134564
																4.16026	-0.000133368
																4.16553	-0.000133574
																4.1708	-0.000133779
																4.17606	-0.000134137
																4.18133	-0.000124993
																4.18659	-0.000124
																4.19186	-0.000123007
																4.19713	-0.000122139
																4.20239	-0.000123177
																4.20766	-0.000121988
																4.21292	-0.000119096
																4.21819	-0.000116718
																4.22346	-0.000109306
																4.22872	-0.000106974
																4.23399	-0.000105441
																4.23925	-0.000103909
																4.24452	-0.000102184
																4.24979	-0.000100412
																4.25505	-9.91115e-05
																4.26032	-0.00010142
																4.26558	-0.000103728
																4.27085	-0.000112441
																4.27612	-0.000114646
																4.28138	-0.000113305
																4.28665	-0.00010992
																4.29191	-0.000108463
																4.29718	-0.0001075
																4.30245	-0.000106537
																4.30771	-0.000105853
																4.31298	-0.000107393
																4.31824	-0.000110687
																4.32351	-0.000111454
																4.32878	-0.000110394
																4.33404	-0.000109334
																4.33931	-0.000114582
																4.34457	-0.000113654
																4.34984	-0.000112037
																4.35511	-0.000110421
																4.36037	-0.000101309
																4.36564	-9.68848e-05
																4.3709	-9.42672e-05
																4.37617	-9.337e-05
																4.38144	-9.24727e-05
																4.3867	-9.21653e-05
																4.39197	-9.20403e-05
																4.39723	-8.99502e-05
																4.4025	-8.93659e-05
																4.40777	-8.87816e-05
																4.41303	-8.96573e-05
																4.4183	-8.76548e-05
																4.42356	-8.31241e-05
																4.42883	-7.52427e-05
																4.4341	-7.41259e-05
																4.43936	-7.30984e-05
																4.44463	-7.20709e-05
																4.44989	-7.11327e-05
																4.45516	-7.44934e-05
																4.46043	-7.30473e-05
																4.46569	-7.19104e-05
																4.47096	-7.11006e-05
																4.47622	-7.02907e-05
																4.48149	-7.59187e-05
																4.48676	-8.15068e-05
																4.49202	-7.84983e-05
																4.49729	-6.78723e-05
																4.50255	-5.69464e-05
																4.50782	-5.02189e-05
																4.51309	-4.67176e-05
																4.51835	-4.49599e-05
																4.52362	-4.1621e-05
																4.52888	-3.98697e-05
																4.53415	-3.83305e-05
																4.53942	-3.88135e-05
																4.54468	-3.92965e-05
																4.54995	-4.11063e-05
																4.55521	-4.01958e-05
																4.56048	-4.03525e-05
																4.56575	-3.87142e-05
																4.57101	-2.79335e-05
																4.57628	-2.44389e-05
																4.58154	-2.09443e-05
																4.58681	-1.80191e-05
																4.59208	-1.53269e-05
																4.59734	-1.08993e-05
																4.60261	-7.91538e-06
																4.60787	-6.77361e-06
																4.61314	-6.90685e-06
																4.61841	-7.04009e-06
																4.62367	-5.67699e-06
																4.62894	-4.50147e-06
																4.6342	-3.32595e-06
																4.63947	1.12278e-06
																4.64474	3.07475e-06
																4.65	3.36306e-06
																4.65527	3.65137e-06
																4.66053	-4.18367e-06
																4.6658	-1.00787e-05
																4.67107	-1.33069e-05
																4.67633	-1.51063e-05
																4.6816	-2.18433e-05
																4.68686	-3.05308e-05
																4.69213	-3.59623e-05
																4.6974	-3.61111e-05
																4.70266	-3.39687e-05
																4.70793	-2.85378e-05
																4.71319	-1.63503e-05
																4.71846	-6.50141e-06
																4.72373	-4.4537e-06
																4.72899	-2.406e-06
																4.73426	-8.38719e-07
																4.73952	7.02001e-06
																4.74479	6.88398e-06
																4.75006	6.74795e-06
																4.75532	4.21815e-06
																4.76059	-2.29116e-06
																4.76585	-3.81094e-06
																4.77112	-1.86607e-06
																4.77639	-6.46927e-07
																4.78165	3.72409e-06
																4.78692	8.53099e-06
																4.79218	9.57304e-06
																4.79745	1.06151e-05
																4.80272	1.10919e-05
																4.80798	1.5265e-05
																4.81325	1.50644e-05
																4.81851	1.48638e-05
																4.82378	1.28223e-05
																4.82905	6.62658e-06
																4.83431	1.0406e-05
																4.83958	1.3932e-05
																4.84484	1.68346e-05
																4.85011	2.8347e-05
																4.85537	3.99186e-05
																4.86064	4.31128e-05
																4.86591	4.52946e-05
																4.87117	4.64507e-05
																4.87644	4.99595e-05
																4.8817	6.13724e-05
																4.88697	6.16043e-05
																4.89224	6.18361e-05
																4.8975	6.11116e-05
																4.90277	6.17907e-05
																4.90803	6.86199e-05
																4.9133	7.10729e-05
																4.91857	7.3253e-05
																4.92383	8.41607e-05
																4.9291	8.53493e-05
																4.93436	8.6538e-05
																4.93963	8.80852e-05
																4.9449	8.90413e-05
																4.95016	8.99973e-05
																4.95543	9.07625e-05
																4.96069	8.85968e-05
																4.96596	8.64311e-05
																4.97123	7.5649e-05
																4.97649	7.43005e-05
																4.98176	7.75389e-05
																4.98702	8.20625e-05
																4.99229	9.00391e-05
																4.99756	9.47947e-05
																5.00282	9.92949e-05
																5.00809	0.000100876
																5.01335	0.000101566
																5.01862	0.000102257
																5.02389	0.000109287
																5.02915	0.000111495
																5.03442	0.000112311
																5.03968	0.000113127
																5.04495	0.000109344
																5.05022	0.000110288
																5.05548	0.00011329
																5.06075	0.000118116
																5.06601	0.000118998
																5.07128	0.00011988
																5.07655	0.000119741
																5.08181	0.000119646
																5.08708	0.000116224
																5.09234	0.000117847
																5.09761	0.000119011
																5.10288	0.000116656
																5.10814	0.000114301
																5.11341	0.00010774
																5.11867	0.000107167
																5.12394	0.000115836
																5.12921	0.000129619
																5.13447	0.00014022
																5.13974	0.000142139
																5.145	0.000143262
																5.15027	0.000149932
																5.15554	0.000156241
																5.1608	0.00016019
																5.16607	0.000161312
																5.17133	0.000161418
																5.1766	0.000161524
																5.18187	0.000161077
																5.18713	0.000162625
																5.1924	0.000166468
																5.19766	0.000173894
																5.20293	0.000176976
																5.2082	0.000178636
																5.21346	0.00017874
																5.21873	0.000178845
																5.22399	0.000176639
																5.22926	0.000177558
																5.23453	0.000178476
																5.23979	0.000173942
																5.24506	0.000169905
																5.25032	0.000166309
																5.25559	0.000161897
																5.26086	0.000159504
																5.26612	0.000158059
																5.27139	0.000161296
																5.27665	0.000163155
																5.28192	0.000162499
																5.28719	0.000161842
																5.29245	0.000160561
																5.29772	0.000157463
																5.30298	0.000157683
																5.30825	0.000155557
																5.31352	0.00015343
																5.31878	0.000144289
																5.32405	0.000144652
																5.32931	0.000149025
																5.33458	0.000150704
																5.33985	0.00015931
																5.34511	0.000171105
																5.35038	0.000172404
																5.35564	0.000172976
																5.36091	0.000173548
																5.36618	0.000171837
																5.37144	0.000171512
																5.37671	0.000171186
																5.38197	0.000166833
																5.38724	0.000158544
																5.39251	0.000158434
																5.39777	0.000154446
																5.40304	0.000149674
																5.4083	0.000153727
																5.41357	0.000157833
																5.41884	0.000159618
																5.4241	0.000156753
																5.42937	0.000153889
																5.43463	0.000150497
																5.4399	0.000151339
																5.44517	0.00015218
																5.45043	0.000144083
																5.4557	0.000130035
																5.46096	0.0001247
																5.46623	0.000124806
																5.4715	0.00011863
																5.47676	0.000117688
																5.48203	0.000122802
																5.48729	0.000127744
																5.49256	0.000131625
																5.49783	0.000133134
																5.50309	0.000134677
																5.50836	0.000135801
																5.51362	0.00013564
																5.51889	0.00013548
																5.52415	0.000132996
																5.52942	0.00012536
																5.53469	0.000126945
																5.53995	0.000128631
																5.54522	0.000131092
																5.55048	0.000136283
																5.55575	0.000136665
																5.56102	0.000137047
																5.56628	0.000135629
																5.57155	0.000133703
																5.57681	0.000134066
																5.58208	0.000136121
																5.58735	0.000137207
																5.59261	0.000132651
																5.59788	0.000128095
																5.60314	0.000121451
																5.60841	0.000121153
																5.61368	0.000121584
																5.61894	0.000120476
																5.62421	0.000121281
																5.62947	0.000122086
																5.63474	0.000121979
																5.64001	0.000121589
																5.64527	0.000118797
																5.65054	0.000117723
																5.6558	0.00011823
																5.66107	0.000118737
																5.66634	0.000105803
																5.6716	9.86702e-05
																5.67687	9.45768e-05
																5.68213	9.17599e-05
																5.6874	9.20558e-05
																5.69267	9.33597e-05
																5.69793	9.77265e-05
																5.7032	9.6828e-05
																5.70846	9.59295e-05
																5.71373	9.2717e-05
																5.719	8.44956e-05
																5.72426	8.65076e-05
																5.72953	8.70329e-05
																5.73479	8.75581e-05
																5.74006	8.04596e-05
																5.74533	7.2438e-05
																5.75059	7.24049e-05
																5.75586	7.20916e-05
																5.76112	7.04296e-05
																5.76639	6.9762e-05
																5.77166	6.90944e-05
																5.77692	6.58336e-05
																5.78219	6.30317e-05
																5.78745	5.70305e-05
																5.79272	5.31239e-05
																5.79799	5.25584e-05
																5.80325	4.59609e-05
																5.80852	3.18725e-05
																5.81378	1.91378e-05
																5.81905	1.51194e-05
																5.82432	1.47344e-05
																5.82958	1.8344e-05
																5.83485	2.07668e-05
																5.84011	2.21653e-05
																5.84538	2.22622e-05
																5.85065	2.23591e-05
																5.85591	2.11544e-05
																5.86118	2.31079e-05
																5.86644	2.53603e-05
																5.87171	2.60416e-05
																5.87698	2.67228e-05
																5.88224	1.88576e-05
																5.88751	2.13249e-05
																5.89277	2.37922e-05
																5.89804	3.00086e-05
																5.90331	3.56913e-05
																5.90857	3.83222e-05
																5.91384	4.002e-05
																5.9191	4.09949e-05
																5.92437	4.19697e-05
																5.92964	4.22215e-05
																5.9349	3.94289e-05
																5.94017	3.19694e-05
																5.94543	2.34107e-05
																5.9507	1.23125e-05
																5.95597	1.63685e-06
																5.96123	1.94112e-06
																5.9665	2.90273e-06
																5.97176	3.28221e-06
																5.97703	3.6617e-06
																5.9823	2.24463e-06
																5.98756	-1.9531e-07
																5.99283	-1.1405e-06
																5.99809	-2.08569e-06
																6.00336	-1.93354e-06
																6.00863	-2.39938e-06
																6.01389	-1.18149e-05
																6.01916	-2.15041e-05
																6.02442	-2.9463e-05
																6.02969	-3.25641e-05
																6.03496	-3.38978e-05
																6.04022	-2.94347e-05
																6.04549	-2.66777e-05
																6.05075	-2.49908e-05
																6.05602	-2.53014e-05
																6.06129	-2.56119e-05
																6.06655	-2.22589e-05
																6.07182	-1.38651e-05
																6.07708	-1.22324e-05
																6.08235	-1.1272e-05
																6.08762	-1.03117e-05
																6.09288	-1.09501e-05
																6.09815	-1.15885e-05
																6.10341	-1.10952e-05
																6.10868	-4.17312e-06
																6.11395	1.79488e-06
																6.11921	5.08594e-06
																6.12448	2.82609e-06
																6.12974	5.66234e-07
																6.13501	-5.5509e-07
																6.14028	-2.69403e-06
																6.14554	-3.91214e-06
																6.15081	-1.00957e-05
																6.15607	-2.21639e-05
																6.16134	-3.32873e-05
																6.16661	-3.74727e-05
																6.17187	-3.83276e-05
																6.17714	-4.07979e-05
																6.1824	-3.96242e-05
																6.18767	-3.87178e-05
																6.19293	-3.78115e-05
																6.1982	-4.22426e-05
																6.20347	-4.41857e-05
																6.20873	-4.48946e-05
																6.214	-4.38778e-05
																6.21926	-4.28611e-05
																6.22453	-4.40431e-05
																6.2298	-5.43896e-05
																6.23506	-5.57151e-05
																6.24033	-5.69242e-05
																6.24559	-5.81332e-05
																6.25086	-5.88807e-05
																6.25613	-5.84788e-05
																6.26139	-5.80768e-05
																6.26666	-5.95231e-05
																6.27192	-6.58741e-05
																6.27719	-6.91261e-05
																6.28246	-6.97618e-05
																6.28772	-6.97145e-05
																6.29299	-7.67692e-05
																6.29825	-8.58678e-05
																6.30352	-9.59912e-05
																6.30879	-9.81438e-05
																6.31405	-9.65222e-05
																6.31932	-9.49006e-05
																6.32458	-9.13165e-05
																6.32985	-8.5113e-05
																6.33512	-8.40324e-05
																6.34038	-8.31465e-05
																6.34565	-8.22605e-05
																6.35091	-7.77601e-05
																6.35618	-7.77041e-05
																6.36145	-7.7648e-05
																6.36671	-8.13438e-05
																6.37198	-8.97452e-05
																6.37724	-8.48346e-05
																6.38251	-8.34983e-05
																6.38778	-8.21621e-05
																6.39304	-7.36846e-05
																6.39831	-7.11484e-05
																6.40357	-7.01412e-05
																6.40884	-6.91339e-05
																6.41411	-7.05122e-05
																6.41937	-7.05705e-05
																6.42464	-7.06288e-05
																6.4299	-7.07544e-05
																6.43517	-7.08799e-05
																6.44044	-7.91602e-05
																6.4457	-8.0699e-05
																6.45097	-7.98461e-05
																6.45623	-7.61767e-05
																6.4615	-6.93562e-05
																6.46677	-6.40673e-05
																6.47203	-6.38001e-05
																6.4773	-6.35328e-05
																6.48256	-6.5004e-05
																6.48783	-6.65937e-05
																6.4931	-6.23735e-05
																6.49836	-6.27447e-05
																6.50363	-6.31159e-05
																6.50889	-6.51866e-05
																6.51416	-7.39209e-05
																6.51943	-8.03015e-05
																6.52469	-8.24118e-05
																6.52996	-7.5278e-05
																6.53522	-7.07092e-05
																6.54049	-6.87579e-05
																6.54576	-6.8121e-05
																6.55102	-6.7484e-05
																6.55629	-6.74528e-05
																6.56155	-7.20938e-05
																6.56682	-7.20173e-05
																6.57209	-7.37546e-05
																6.57735	-7.54919e-05
																6.58262	-7.83422e-05
																6.58788	-8.23065e-05
																6.59315	-9.17656e-05
																6.59842	-8.69399e-05
																6.60368	-7.64888e-05
																6.60895	-7.3366e-05
																6.61421	-7.11259e-05
																6.61948	-6.93507e-05
																6.62475	-6.59696e-05
																6.63001	-6.42155e-05
																6.63528	-5.83048e-05
																6.64054	-5.38546e-05
																6.64581	-5.16811e-05
																6.65108	-5.11297e-05
																6.65634	-5.05783e-05
																6.66161	-5.12784e-05
																6.66687	-4.63759e-05
																6.67214	-3.08772e-05
																6.67741	-2.48499e-05
																6.68267	-2.19444e-05
																6.68794	-1.90389e-05
																6.6932	-1.67749e-05
																6.69847	-1.21081e-05
																6.70374	-9.87693e-06
																6.709	-9.41055e-06
																6.71427	-8.94417e-06
																6.71953	-1.05062e-05
																6.7248	-1.73687e-05
																6.73007	-2.25263e-05
																6.73533	-2.23351e-05
																6.7406	-1.66216e-05
																6.74586	-1.59229e-05
																6.75113	-1.52242e-05
																6.7564	-1.61536e-05
																6.76166	-2.04371e-05
																6.76693	-2.15659e-05
																6.77219	-2.05344e-05
																6.77746	-2.41964e-05
																6.78273	-2.60171e-05
																6.78799	-3.05711e-05
																6.79326	-3.10049e-05
																6.79852	-2.9215e-05
																6.80379	-2.7425e-05
																6.80906	-1.79015e-05
																6.81432	-7.7996e-07
																6.81959	1.17803e-05
																6.82485	1.87668e-05
																6.83012	2.58474e-05
																6.83539	3.16491e-05
																6.84065	3.90179e-05
																6.84592	4.48143e-05
																6.85118	4.78512e-05
																6.85645	4.94199e-05
																6.86172	5.00236e-05
																6.86698	5.06273e-05
																6.87225	5.07241e-05
																6.87751	5.25231e-05
																6.88278	6.25104e-05
																6.88804	7.34137e-05
																6.89331	7.53e-05
																6.89858	7.66399e-05
																6.90384	7.65764e-05
																6.90911	7.65129e-05
																6.91437	8.18939e-05
																6.91964	8.25692e-05
																6.92491	8.32446e-05
																6.93017	8.05457e-05
																6.93544	8.07088e-05
																6.9407	8.82133e-05
																6.94597	9.55181e-05
																6.95124	0.000106478
																6.9565	0.000121794
																6.96177	0.000126227
																6.96703	0.000128438
																6.9723	0.000129818
																6.97757	0.000131198
																6.98283	0.000140292
																6.9881	0.000144271
																6.99336	0.000145504
																6.99863	0.000146106
																7.0039	0.000146709
																7.00916	0.00015949
																7.01443	0.000165247
																7.01969	0.000172223
																7.02496	0.000182429
																7.03023	0.000194544
																7.03549	0.000199535
																7.04076	0.000202557
																7.04602	0.00020558
																7.05129	0.00020727
																7.05656	0.000216313
																7.06182	0.000215795
																7.06709	0.000215276
																7.07235	0.000211963
																7.07762	0.000212702
																7.08289	0.000218269
																7.08815	0.000222701
																7.09342	0.000228065
																7.09868	0.000232695
																7.10395	0.000234242
																7.10922	0.000240731
																7.11448	0.000249437
																7.11975	0.000255292
																7.12501	0.000262003
																7.13028	0.000264031
																7.13555	0.0002645
																7.14081	0.000264969
																7.14608	0.000262972
																7.15134	0.000264247
																7.15661	0.000270179
																7.16188	0.00027499
																7.16714	0.000283957
																7.17241	0.000291652
																7.17767	0.000293677
																7.18294	0.000233433
																7.18821	0.000173189
																7.19347	5.06757e-05
																7.19874	5.07621e-05
																7.204	0.000179581
																7.20927	0.000243792
																7.21454	0.000275825
																7.2198	0.000307857
																7.22507	0.00030945
																7.23033	0.000311043
																7.2356	0.000318224
																7.24087	0.000319912
																7.24613	0.000321254
																7.2514	0.000321874
																7.25666	0.000322495
																7.26193	0.000320832
																7.2672	0.000320442
																7.27246	0.00031968
																7.27773	0.000318919
																7.28299	0.000310194
																7.28826	0.000306909
																7.29353	0.000306948
																7.29879	0.000311247
																7.30406	0.000321889
																7.30932	0.000328459
																7.31459	0.000331711
																7.31986	0.000339237
																7.32512	0.000345275
																7.33039	0.00034808
																7.33565	0.000350833
																7.34092	0.000352573
																7.34619	0.000351243
																7.35145	0.000349913
																7.35672	0.000341279
																7.36198	0.000333838
																7.36725	0.000330462
																7.37252	0.000335467
																7.37778	0.000339536
																7.38305	0.000340927
																7.38831	0.000342079
																7.39358	0.00034237
																7.39885	0.000342662
																7.40411	0.000342094
																7.40938	0.000344942
																7.41464	0.000346636
																7.41991	0.000344797
																7.42518	0.000342959
																7.43044	0.000343405
																7.43571	0.000346034
																7.44097	0.000353182
																7.44624	0.00036249
																7.45151	0.000365486
																7.45677	0.00036688
																7.46204	0.000368274
																7.4673	0.000375208
																7.47257	0.000376792
																7.47784	0.000375539
																7.4831	0.000374285
																7.48837	0.000369788
																7.49363	0.000361676
																7.4989	0.000357205
																7.50417	0.000357454
																7.50943	0.000354373
																7.5147	0.000355848
																7.51996	0.000359596
																7.52523	0.000361765
																7.5305	0.000359474
																7.53576	0.000357182
																7.54103	0.000356721
																7.54629	0.000356299
																7.55156	0.000355877
																7.55682	0.000353715
																7.56209	0.000347183
																7.56736	0.000346167
																7.57262	0.000346601
																7.57789	0.000347035
																7.58315	0.000352563
																7.58842	0.000358411
																7.59369	0.000361698
																7.59895	0.000363449
																7.60422	0.000362484
																7.60948	0.000361519
																7.61475	0.000361635
																7.62002	0.000360212
																7.62528	0.00035879
																7.63055	0.000347349
																7.63581	0.000342026
																7.64108	0.000337407
																7.64635	0.000337012
																7.65161	0.000340548
																7.65688	0.000349771
																7.66214	0.000350707
																7.66741	0.000351642
																7.67268	0.000351023
																7.67794	0.000349825
																7.68321	0.000351625
																7.68847	0.000352018
																7.69374	0.000352411
																7.69901	0.000349365
																7.70427	0.000341702
																7.70954	0.000342177
																7.7148	0.000343098
																7.72007	0.000341539
																7.72534	0.000347464
																7.7306	0.000355598
																7.73587	0.000359826
																7.74113	0.000361652
																7.7464	0.0003619
																7.75167	0.000362148
																7.75693	0.000372577
																7.7622	0.00037688
																7.76746	0.000381184
																7.77273	0.000382483
																7.778	0.000383805
																7.78326	0.000387076
																7.78853	0.000394285
																7.79379	0.000406285
																7.79906	0.000422117
																7.80433	0.000433418
																7.80959	0.000442871
																7.81486	0.000454881
																7.82012	0.000460378
																7.82539	0.000478825
																7.83066	0.000505786
																7.83592	0.000523367
																7.84119	0.0005362
																7.84645	0.000554313
																7.85172	0.000579616
																7.85699	0.000612327
																7.86225	0.000647165
																7.86752	0.00068822
																7.87278	0.00073349
																7.87805	0.000771899
																7.88332	0.000818735
																7.88858	0.000865993
																7.89385	0.000922687
																7.89911	0.000983014
																7.90438	0.00104797
																7.90965	0.00110998
																7.91491	0.00117983
																7.92018	0.00125126
																7.92544	0.00134098
																7.93071	0.00143081
																7.93598	0.00153492
																7.94124	0.00164006
																7.94651	0.00175704
																7.95177	0.00187109
																7.95704	0.00198799
																7.96231	0.00212446
																7.96757	0.002268
																7.97284	0.00241452
																7.9781	0.00256656
																7.98337	0.00272942
																7.98864	0.00287782
																7.9939	0.00305156
																7.99917	0.00323016
																8.00443	0.00343383
																8.0097	0.00363194
																8.01497	0.00384796
																8.02023	0.00405914
																8.0255	0.00428715
																8.03076	0.00450545
																8.03603	0.00472802
																8.0413	0.00498271
																8.04656	0.00522991
																8.05183	0.0054985
																8.05709	0.00574251
																8.06236	0.00601547
																8.06763	0.00628464
																8.07289	0.00658569
																8.07816	0.00686819
																8.08342	0.00718052
																8.08869	0.00748292
																8.09396	0.00779913
																8.09922	0.00810578
																8.10449	0.00843524
																8.10975	0.0087552
																8.11502	0.00910816
																8.12029	0.00944231
																8.12555	0.0097764
																8.13082	0.0101302
																8.13608	0.010491
																8.14135	0.0108416
																8.14662	0.0112078
																8.15188	0.0116059
																8.15715	0.0119915
																8.16241	0.0123929
																8.16768	0.0127779
																8.17295	0.0131937
																8.17821	0.013591
																8.18348	0.0139886
																8.18874	0.0144426
																8.19401	0.0148839
																8.19928	0.0152957
																8.20454	0.0157107
																8.20981	0.0161736
																8.21507	0.0165995
																8.22034	0.0170849
																8.2256	0.0175426
																8.23087	0.0180234
																8.23614	0.018486
																8.2414	0.0189876
																8.24667	0.0194502
																8.25193	0.0199592
																8.2572	0.0204552
																8.26247	0.0209747
																8.26773	0.0214555
																8.273	0.021933
																8.27826	0.0224744
																8.28353	0.0230056
																8.2888	0.0235197
																8.29406	0.02405
																8.29933	0.0246203
																8.30459	0.025135
																8.30986	0.0257012
																8.31513	0.0262409
																8.32039	0.0268332
																8.32566	0.0273931
																8.33092	0.0279588
																8.33619	0.0285673
																8.34146	0.0291652
																8.34672	0.0297504
																8.35199	0.0303281
																8.35725	0.0309617
																8.36252	0.0315717
																8.36779	0.0322517
																8.37305	0.0328653
																8.37832	0.0335415
																8.38358	0.0341876
																8.38885	0.034894
																8.39412	0.0355623
																8.39938	0.0363065
																8.40465	0.0370124
																8.40991	0.037762
																8.41518	0.0384688
																8.42045	0.0392428
																8.42571	0.0399878
																8.43098	0.0408135
																8.43624	0.0416301
																8.44151	0.0424308
																8.44678	0.043313
																8.45204	0.044158
																8.45731	0.0451672
																8.46257	0.0461408
																8.46784	0.0471753
																8.47311	0.0481523
																8.47837	0.0492487
																8.48364	0.0502702
																8.4889	0.0513496
																8.49417	0.0523457
																8.49944	0.0533863
																8.5047	0.0546692
																8.50997	0.0559381
																8.51523	0.0570635
																8.5205	0.0582026
																8.52577	0.0594758
																8.53103	0.0606655
																8.5363	0.0620215
																8.54156	0.0633093
																8.54683	0.0646858
																8.5521	0.0659547
																8.55736	0.0673812
																8.56263	0.0687048
																8.56789	0.0701491
																8.57316	0.0716839
																8.57843	0.0733584
																8.58369	0.0748191
																8.58896	0.076401
																8.59422	0.0779336
																8.59949	0.079552
																8.60476	0.0811486
																8.61002	0.0827711
																8.61529	0.0845061
																8.62055	0.0860679
																8.62582	0.0878093
																8.63109	0.0894279
																8.63635	0.0911754
																8.64162	0.0928359
																8.64688	0.0946886
																8.65215	0.0964248
																8.65742	0.0982698
																8.66268	0.0999809
																8.66795	0.101685
																8.67321	0.103576
																8.67848	0.10563
																8.68375	0.107628
																8.68901	0.109409
																8.69428	0.111298
																8.69954	0.113093
																8.70481	0.114973
																8.71008	0.116667
																8.71534	0.118565
																8.72061	0.120308
																8.72587	0.122148
																8.73114	0.12384
																8.73641	0.125643
																8.74167	0.127346
																8.74694	0.129194
																8.7522	0.130881
																8.75747	0.132684
																8.76274	0.134356
																8.768	0.13604
																8.77327	0.137593
																8.77853	0.139086
																8.7838	0.140759
																8.78907	0.142393
																8.79433	0.143873
																8.7996	0.145313
																8.80486	0.146865
																8.81013	0.148239
																8.8154	0.149724
																8.82066	0.15113
																8.82593	0.152543
																8.83119	0.153782
																8.83646	0.155014
																8.84173	0.156308
																8.84699	0.157516
																8.85226	0.158675
																8.85752	0.159817
																8.86279	0.160989
																8.86806	0.162041
																8.87332	0.163221
																8.87859	0.164243
																8.88385	0.165263
																8.88912	0.166198
																8.89439	0.167156
																8.89965	0.167962
																8.90492	0.168785
																8.91018	0.169543
																8.91545	0.170293
																8.92071	0.170957
																8.92598	0.171655
																8.93125	0.17227
																8.93651	0.172862
																8.94178	0.173407
																8.94704	0.173909
																8.95231	0.174417
																8.95758	0.1749
																8.96284	0.175327
																8.96811	0.175688
																8.97337	0.176036
																8.97864	0.176332
																8.98391	0.176605
																8.98917	0.176836
																8.99444	0.177062
																8.9997	0.177235
																9.00497	0.177365
																9.01024	0.177481
																9.0155	0.177576
																9.02077	0.177636
																9.02603	0.177652
																9.0313	0.177658
																9.03657	0.177631
																9.04183	0.177604
																9.0471	0.177519
																9.05236	0.177395
																9.05763	0.177263
																9.0629	0.177097
																9.06816	0.176913
																9.07343	0.176678
																9.07869	0.176434
																9.08396	0.176164
																9.08923	0.175898
																9.09449	0.175592
																9.09976	0.175284
																9.10502	0.17494
																9.11029	0.174604
																9.11556	0.174254
																9.12082	0.17384
																9.12609	0.173427
																9.13135	0.173019
																9.13662	0.172591
																9.14189	0.172099
																9.14715	0.17164
																9.15242	0.171139
																9.15768	0.170666
																9.16295	0.170159
																9.16822	0.169671
																9.17348	0.169172
																9.17875	0.168634
																9.18401	0.168102
																9.18928	0.167576
																9.19455	0.167052
																9.19981	0.166481
																9.20508	0.165932
																9.21034	0.165314
																9.21561	0.164744
																9.22088	0.164122
																9.22614	0.163544
																9.23141	0.162874
																9.23667	0.162223
																9.24194	0.161566
																9.24721	0.160985
																9.25247	0.160378
																9.25774	0.1598
																9.263	0.159173
																9.26827	0.158587
																9.27354	0.157958
																9.2788	0.15736
																9.28407	0.156754
																9.28933	0.156105
																9.2946	0.15547
																9.29987	0.154895
																9.30513	0.154315
																9.3104	0.153685
																9.31566	0.153098
																9.32093	0.152503
																9.3262	0.151942
																9.33146	0.151335
																9.33673	0.150767
																9.34199	0.150218
																9.34726	0.149588
																9.35253	0.148978
																9.35779	0.148412
																9.36306	0.147851
																9.36832	0.147248
																9.37359	0.146718
																9.37886	0.146125
																9.38412	0.145577
																9.38939	0.14502
																9.39465	0.144493
																9.39992	0.143937
																9.40519	0.143415
																9.41045	0.142867
																9.41572	0.142327
																9.42098	0.141762
																9.42625	0.141237
																9.43152	0.140685
																9.43678	0.140162
																9.44205	0.139664
																9.44731	0.139125
																9.45258	0.138606
																9.45785	0.138076
																9.46311	0.137602
																9.46838	0.137085
																9.47364	0.136598
																9.47891	0.136105
																9.48418	0.135617
																9.48944	0.135085
																9.49471	0.1346
																9.49997	0.134096
																9.50524	0.133608
																9.51051	0.133094
																9.51577	0.13251
																9.52104	0.131978
																9.5263	0.131515
																9.53157	0.131077
																9.53684	0.130607
																9.5421	0.130175
																9.54737	0.129714
																9.55263	0.12928
																9.5579	0.1288
																9.56317	0.128357
																9.56843	0.127894
																9.5737	0.127462
																9.57896	0.127011
																9.58423	0.12659
																9.58949	0.126136
																9.59476	0.125713
																9.60003	0.125314
																9.60529	0.124886
																9.61056	0.124484
																9.61582	0.124064
																9.62109	0.123674
																9.62636	0.123233
																9.63162	0.122821
																9.63689	0.122396
																9.64215	0.121996
																9.64742	0.121576
																9.65269	0.121188
																9.65795	0.120799
																9.66322	0.120375
																9.66848	0.119977
																9.67375	0.119607
																9.67902	0.11923
																9.68428	0.118825
																9.68955	0.118474
																9.69481	0.118071
																9.70008	0.11769
																9.70535	0.11729
																9.71061	0.116928
																9.71588	0.116533
																9.72114	0.116181
																9.72641	0.115813
																9.73168	0.115454
																9.73694	0.115079
																9.74221	0.11475
																9.74747	0.114425
																9.75274	0.114068
																9.75801	0.113729
																9.76327	0.113407
																9.76854	0.113045
																9.7738	0.112612
																9.77907	0.112251
																9.78434	0.111911
																9.7896	0.111604
																9.79487	0.111279
																9.80013	0.110966
																9.8054	0.110642
																9.81067	0.110354
																9.81593	0.110052
																9.8212	0.109758
																9.82646	0.109476
																9.83173	0.109178
																9.837	0.10887
																9.84226	0.108574
																9.84753	0.108293
																9.85279	0.107892
																9.85806	0.107406
																9.86333	0.106983
																9.86859	0.106715
																9.87386	0.106419
																9.87912	0.106163
																9.88439	0.105896
																9.88966	0.105651
																9.89492	0.105397
																9.90019	0.105167
																9.90545	0.104914
																9.91072	0.104675
																9.91599	0.104447
																9.92125	0.104203
																9.92652	0.103967
																9.93178	0.103756
																9.93705	0.103549
																9.94232	0.103316
																9.94758	0.103114
																9.95285	0.102918
																9.95811	0.102722
																9.96338	0.102512
																9.96865	0.102341
																9.97391	0.102155
																9.97918	0.101965
																9.98444	0.101775
																9.98971	0.101604
																9.99498	0.101434
																10.0002	0.101263
																10.0055	0.101106
																10.0108	0.100951
																10.016	0.100803
																10.0213	0.100658
																10.0266	0.100536
																10.0318	0.100406
																10.0371	0.100298
																10.0424	0.100184
																10.0476	0.100073
																10.0529	0.0999649
																10.0582	0.099871
																10.0634	0.0997737
																10.0687	0.0996904
																10.074	0.0996196
																10.0792	0.099557
																10.0845	0.0994936
																10.0898	0.0994392
																10.095	0.0993996
																10.1003	0.0993696
																10.1056	0.0993436
																10.1108	0.0993301
																10.1161	0.099321
																10.1214	0.0993156
																10.1266	0.0993214
																10.1319	0.0993318
																10.1372	0.0993525
																10.1424	0.09939
																10.1477	0.0994423
																10.153	0.0994964
																10.1582	0.0995473
																10.1635	0.0996168
																10.1688	0.0997064
																10.174	0.0998
																10.1793	0.0998982
																10.1846	0.100004
																10.1898	0.100127
																10.1951	0.10025
																10.2003	0.100391
																10.2056	0.10053
[truncated: 1,989 more rows]

## Sheet: T1171V
volume (mL)	Molar Mass 1	volume (mL)	Molar Mass 2	volume (mL)	Molar Mass 3	volume (mL)	Molar Mass 4									volume (mL)	RI
8.64082	367947	9.65457	194198	10.5198	129562	16.1979	24468									-0.315822	0.000792996
8.64594	367618	9.65969	193093	10.525	129625	16.203	24507.9									-0.310556	0.000710763
8.65106	365856	9.66481	192481	10.5301	129506	16.2081	24478.5									-0.30529	0.000639485
8.65618	365018	9.66993	191952	10.5352	129383	16.2133	24374.1									-0.300024	0.000543318
8.6613	363553	9.67505	191559	10.5403	129266	16.2184	24259.5									-0.294758	0.00043027
8.66642	361885	9.68017	191098	10.5454	129155	16.2235	24216									-0.289492	0.000351565
8.67154	360176	9.68529	190572	10.5506	129000	16.2286	24170.2									-0.284226	0.000283974
8.67666	358541	9.69041	189979	10.5557	128789	16.2337	24146.6									-0.27896	0.000219444
8.68178	356846	9.69553	189454	10.5608	128514	16.2389	24161.1									-0.273694	0.000164027
8.6869	355365	9.70065	188875	10.5659	128176	16.244	24151									-0.268428	6.87043e-05
8.69202	354135	9.70577	188147	10.571	127905	16.2491	24098.8									-0.263162	-4.43682e-05
8.69714	352780	9.71089	187606	10.5762	127658	16.2542	24053.3									-0.257895	-0.000147582
8.70226	351639	9.71601	186928	10.5813	127440	16.2593	24005.6									-0.252629	-0.000204183
8.70738	350462	9.72113	186223	10.5864	127253	16.2645	23938.5									-0.247363	-0.000230781
8.7125	348835	9.72625	185571	10.5915	127069	16.2696	23853.2									-0.242097	-0.000222998
8.71762	347009	9.73137	185072	10.5966	126877	16.2747	23725.6									-0.236831	-0.000231588
8.72274	345724	9.73649	184536	10.6018	126723	16.2798	23619.1									-0.231565	-0.000240178
8.72786	344725	9.74161	184022	10.6069	126616	16.2849	23580.8									-0.226299	-0.000266868
8.73298	344018	9.74673	183508	10.612	126478	16.2901	23578.5									-0.221033	-0.000297452
8.7381	343000	9.75185	183060	10.6171	126336	16.2952	23597.2									-0.215767	-0.00030989
8.74322	341486	9.75697	182594	10.6222	126178	16.3003	23598.5									-0.210501	-0.000326767
8.74834	340181	9.76209	182188	10.6274	125903	16.3054	23563.9									-0.205235	-0.000332825
8.75346	338826	9.76721	181947	10.6325	125571	16.3105	23490.7									-0.199969	-0.000338882
8.75858	337656	9.77233	181720	10.6376	125269	16.3157	23427									-0.194703	-0.000414186
8.7637	336517	9.77745	181440	10.6427	124980	16.3208	23357.5									-0.189437	-0.000464488
8.76882	335562	9.78257	180945	10.6478	124741	16.3259	23267.7									-0.184171	-0.00046974
8.77394	334386	9.78769	180333	10.653	124533	16.331	23189.5									-0.178905	-0.000431046
8.77906	332548	9.79281	179790	10.6581	124450	16.3361	23107									-0.173639	-0.00037269
8.78418	330696	9.79793	179344	10.6632	124366	16.3413	23023.3									-0.168373	-0.00029819
8.7893	329519	9.80305	178902	10.6683	124212	16.3464	22916.5									-0.163107	-0.000277001
8.79442	328705	9.80817	178464	10.6734	123959	16.3515	22853.9									-0.157841	-0.000272148
8.79954	327397	9.81329	177804	10.6786	123711	16.3566	22795.2									-0.152575	-0.000267295
8.80466	326380	9.81841	177188	10.6837	123472	16.3617	22777									-0.147309	-0.000255875
8.80978	325104	9.82353	176688	10.6888	123211	16.3669	22728.4									-0.142043	-0.000237901
8.8149	324331	9.82865	176257	10.6939	122967	16.372	22689									-0.136777	-0.000254331
8.82002	323083	9.83377	175892	10.699	122793	16.3771	22649									-0.131511	-0.00027076
8.82514	321936	9.83889	175499	10.7042	122677	16.3822	22582.4									-0.126245	-0.000305231
8.83026	320679	9.84401	174976	10.7093	122591	16.3873	22491.5									-0.120979	-0.000372485
8.83538	319695	9.84913	174365	10.7144	122532	16.3925	22385.4									-0.115713	-0.000393502
8.8405	318682	9.85425	173894	10.7195	122456	16.3976	22293.1									-0.110447	-0.000374673
8.84562	317624	9.85937	173530	10.7246	122333	16.4027	22193.3									-0.105181	-0.000332759
8.85074	316308	9.86449	173116	10.7298	122221	16.4078	22101.5									-0.0999146	-0.000255134
8.85586	315149	9.86961	172455	10.7349	122152	16.4129	22019.2									-0.0946486	-0.000217348
8.86098	314126	9.87473	171893	10.74	122069	16.4181	21940.9									-0.0893825	-0.000215812
8.8661	313240	9.87985	171418	10.7451	122019	16.4232	21859.4									-0.0841165	-0.000215942
8.87122	312347	9.88497	170922	10.7502	121843	16.4283	21797									-0.0788505	-0.000216072
8.87634	311462	9.89009	170438	10.7554	121538	16.4334	21739.8									-0.0735845	-0.000211899
8.88146	310599	9.89521	169841	10.7605	121257	16.4385	21684.5									-0.0683184	-0.000211493
8.88658	309564	9.90033	169452	10.7656	120981	16.4437	21623									-0.0630524	-0.000211087
8.8917	308527	9.90545	169059	10.7707	120697	16.4488	21561.4									-0.0577864	-0.000228351
8.89682	307605	9.91057	168550	10.7758	120381	16.4539	21506.3									-0.0525203	-0.000294265
8.90194	306753			10.781	120078	16.459	21458.8									-0.0472543	-0.000335921
8.90706	305823			10.7861	119786	16.4641	21399									-0.0419883	-0.00032129
8.91218	304781			10.7912	119524	16.4693	21351.8									-0.0367222	-0.000275908
8.9173	303769			10.7963	119284	16.4744	21320.8									-0.0314562	-0.000205415
8.92242	302736			10.8014	119068	16.4795	21295.2									-0.0261902	-0.000169522
8.92754	301809			10.8066	118820	16.4846	21277.1									-0.0209242	-0.000154071
8.93266	300867			10.8117	118606	16.4897	21256.6									-0.0156581	-0.000153771
8.93778	299940			10.8168	118399	16.4949	21237.3									-0.0103921	-0.00015347
8.9429	299029			10.8219	118213	16.5	21217.1									-0.00512607	-0.000163024
8.94802	298101			10.827	117953	16.5051	21160.9									0.000139957	-0.000182484
8.95314	297181			10.8322	117733	16.5102	21083.8									0.00540599	-0.000184325
8.95826	296314			10.8373	117529	16.5153	21002.3									0.010672	-0.000220282
8.96338	295525			10.8424	117273	16.5205	20929.2									0.015938	-0.000296338
8.9685	294748			10.8475	117094	16.5256	20869.4									0.0212041	-0.000350133
8.97362	293897			10.8526	116996	16.5307	20819.7									0.0264701	-0.000362046
8.97874	292994			10.8578	116879	16.5358	20744.3									0.0317361	-0.000349322
8.98386	292120			10.8629	116720	16.5409	20671.8									0.0370022	-0.000319165
8.98898	291175			10.868	116575	16.5461	20610.3									0.0422682	-0.000251756
8.9941	290292			10.8731	116318	16.5512	20570.1									0.0475342	-0.000250907
8.99922	289518			10.8782	116087	16.5563	20539.2									0.0528002	-0.000255115
9.00434	288849			10.8834	115924	16.5614	20510.9									0.0580663	-0.000259323
9.00946	288068			10.8885	115816	16.5665	20474.5									0.0633323	-0.000272176
9.01458	287227			10.8936	115716	16.5717	20430.8									0.0685983	-0.000268026
9.0197	286417			10.8987	115634	16.5768	20374.6									0.0738644	-0.000265137
9.02482	285515			10.9038	115576	16.5819	20333.4									0.0791304	-0.000274754
9.02994	284566			10.909	115408	16.587	20293.1									0.0843964	-0.00028437
9.03506	283624			10.9141	115209	16.5921	20252.1									0.0896625	-0.000354852
9.04018	282795			10.9192	114976	16.5973	20224									0.0949285	-0.000368222
9.0453	282035			10.9243	114816	16.6024	20221.8									0.100195	-0.000346982
9.05042	281195			10.9294	114692	16.6075	20214									0.105461	-0.000314545
9.05554	280425			10.9346	114611	16.6126	20184.3									0.110727	-0.000247671
9.06066	279731			10.9397	114576	16.6177	20149.2									0.115993	-0.000218258
9.06578	278814			10.9448	114569	16.6229	20118.9									0.121259	-0.000209367
9.0709	277819			10.9499	114546	16.628	20042.8									0.126525	-0.000209952
9.07602	276830			10.955	114295	16.6331	19984.9									0.131791	-0.000210538
9.08114	275927			10.9602	113909	16.6382	19933									0.137057	-0.000200948
9.08626	275062			10.9653	113526	16.6433	19834.5									0.142323	-0.000203909
9.09138	274249			10.9704	113413	16.6485	19718.8									0.147589	-0.000206871
9.0965	273457			10.9755	113402	16.6536	19623.5									0.152855	-0.000231407
9.10162	272620			10.9806	113395	16.6587	19605									0.158121	-0.000308456
9.10674	271676			10.9858	113107	16.6638	19610.5									0.163387	-0.000339318
9.11186	270787			10.9909	112870	16.6689	19617.3									0.168653	-0.000319981
9.11698	269930			10.996	112671	16.6741	19612.3									0.173919	-0.000279254
9.1221	269162			11.0011	112456	16.6792	19553.8									0.179185	-0.000223448
9.12721	268448					16.6843	19493.5									0.184451	-0.000192314
9.13233	267734					16.6894	19407.9									0.189717	-0.000178173
9.13745	267068					16.6945	19337.6									0.194983	-0.000182288
9.14257	266207					16.6997	19279.4									0.200249	-0.000186403
9.14769	265366					16.7048	19259.9									0.205515	-0.000214832
9.15281	264568					16.7099	19234.9									0.210781	-0.000213903
9.15793	263809					16.715	19168.7									0.216047	-0.000214691
9.16305	262908					16.7201	19117.4									0.221313	-0.00021548
9.16817	262266					16.7253	19037.5									0.226579	-0.000312624
9.17329	261610					16.7304	18938.9									0.231845	-0.000358711
9.17841	260869					16.7355	18840.6									0.237111	-0.000359101
9.18353	260012					16.7406	18781.2									0.242377	-0.000337519
9.18865	259262															0.247643	-0.000294024
9.19377	258488															0.252909	-0.000232723
9.19889	257971															0.258175	-0.000205004
9.20401	257312															0.263441	-0.000205558
9.20913	256469															0.268707	-0.000206112
9.21425	255621															0.273973	-0.000209513
9.21937	254726															0.27924	-0.000205358
9.22449	253887															0.284506	-0.000217296
9.22961	253015															0.289772	-0.000229235
9.23473	252124															0.295038	-0.000259814
9.23985	251263															0.300304	-0.000335116
9.24497	250543															0.30557	-0.000346429
9.25009	249703															0.310836	-0.000320446
9.25521	248783															0.316102	-0.000290454
9.26033	247795															0.321368	-0.000226217
9.26545	246912															0.326634	-0.000200087
9.27057	246129															0.3319	-0.000193033
9.27569	245406															0.337166	-0.000198056
9.28081	244692															0.342432	-0.000203079
9.28593	243881															0.347698	-0.000196789
9.29105	243122															0.352964	-0.000189535
9.29617	242422															0.35823	-0.000194165
9.30129	241665															0.363496	-0.000198794
9.30641	240987															0.368762	-0.000281159
9.31153	240220															0.374028	-0.000325256
9.31665	239433															0.379294	-0.000290185
9.32177	238532															0.38456	-0.000226674
9.32689	237800															0.389826	-0.000166366
9.33201	237046															0.395092	-9.89134e-05
9.33713	236367															0.400358	-9.61783e-05
9.34225	235666															0.405624	-9.52279e-05
9.34737	235082															0.41089	-9.42775e-05
																0.416156	-9.36681e-05
																0.421422	-7.71402e-05
																0.426688	-9.40768e-05
																0.431954	-0.000111013
																0.43722	-0.000148406
																0.442486	-0.000193276
																0.447752	-0.000179984
																0.453018	-0.000139952
																0.458284	-8.00937e-05
																0.463551	-2.43071e-06
																0.468817	4.47971e-06
																0.474083	6.67651e-06
																0.479349	-4.13252e-06
																0.484615	-1.49415e-05
																0.489881	-1.95574e-05
																0.495147	-3.60051e-05
																0.500413	-5.24528e-05
																0.505679	-8.84031e-05
																0.510945	-0.000153429
																0.516211	-0.000177694
																0.521477	-0.000149407
																0.526743	-0.000117666
																0.532009	-6.43914e-05
																0.537275	-4.2538e-05
																0.542541	-3.63337e-05
																0.547807	-4.64306e-05
																0.553073	-5.65274e-05
																0.558339	-6.31352e-05
																0.563605	-6.51983e-05
																0.568871	-6.72613e-05
																0.574137	-8.82989e-05
																0.579403	-0.000167698
																0.584669	-0.000206735
																0.589935	-0.000176342
																0.595201	-0.000128385
																0.600467	-6.77499e-05
																0.605733	3.77303e-06
																0.610999	2.05673e-06
																0.616265	3.40421e-07
																0.621531	-5.18125e-06
																0.626797	-8.57727e-06
																0.632063	-5.33115e-06
																0.637329	-6.608e-06
																0.642596	-7.88484e-06
																0.647862	-8.58635e-05
																0.653128	-0.000139667
																0.658394	-0.000127071
																0.66366	-8.17045e-05
																0.668926	-2.05418e-05
																0.674192	1.4536e-05
																0.679458	3.12157e-05
																0.684724	3.60015e-05
																0.68999	4.07874e-05
																0.695256	4.26947e-05
																0.700522	4.54303e-05
																0.705788	3.61419e-05
																0.711054	2.68536e-05
																0.71632	-1.09249e-05
																0.721586	-7.72619e-05
																0.726852	-8.68252e-05
																0.732118	-4.83679e-05
																0.737384	9.51515e-07
																0.74265	6.86736e-05
																0.747916	9.4883e-05
																0.753182	9.78768e-05
																0.758448	9.85394e-05
																0.763714	9.9202e-05
																0.76898	0.000113
																0.774246	0.000118857
																0.779512	0.000114004
																0.784778	0.00010915
																0.790044	2.59346e-05
																0.79531	5.05706e-06
																0.800576	3.15361e-05
																0.805842	7.9566e-05
																0.811108	0.000149401
																0.816374	0.000205318
																0.821641	0.000212562
																0.826907	0.00021291
																0.832173	0.000213258
																0.837439	0.000211858
																0.842705	0.000204962
																0.847971	0.00020166
																0.853237	0.000198358
																0.858503	0.000111766
																0.863769	5.88848e-05
																0.869035	7.15049e-05
																0.874301	0.000105097
																0.879567	0.00016464
																0.884833	0.000246689
																0.890099	0.000249267
																0.895365	0.000248284
																0.900631	0.000247302
																0.905897	0.00023846
																0.911163	0.000246943
																0.916429	0.000227153
																0.921695	0.000207363
																0.926961	0.00016539
																0.932227	9.65121e-05
																0.937493	8.50452e-05
																0.942759	0.000113076
																0.948025	0.000166996
																0.953291	0.00023977
																0.958557	0.00026631
																0.963823	0.000273469
																0.969089	0.00027687
																0.974355	0.000278392
																0.979621	0.000279914
																0.984887	0.000277079
																0.990153	0.000274244
																0.995419	0.000253489
																1.00069	0.000183036
																1.00595	0.000157344
																1.01122	0.000179135
																1.01648	0.000244732
																1.02175	0.000334761
																1.02702	0.000367118
																1.03228	0.000381006
																1.03755	0.000379198
																1.04281	0.000377391
																1.04808	0.000361602
																1.05335	0.00036051
																1.05861	0.00034339
																1.06388	0.000326271
																1.06914	0.000261709
																1.07441	0.000220353
																1.07968	0.000210588
																1.08494	0.000230839
																1.09021	0.000291292
																1.09547	0.000364721
																1.10074	0.00036433
																1.10601	0.00036394
																1.11127	0.000360121
																1.11654	0.00035545
																1.1218	0.00035286
																1.12707	0.000340426
																1.13234	0.000327992
																1.1376	0.000299438
																1.14287	0.000238345
																1.14813	0.000235341
																1.1534	0.000272543
																1.15867	0.00032027
																1.16393	0.000392552
																1.1692	0.000423067
																1.17446	0.000429983
																1.17973	0.000436899
																1.185	0.000446227
																1.19026	0.00045051
																1.19553	0.000445687
																1.20079	0.000440864
																1.20606	0.00040997
																1.21133	0.000361392
																1.21659	0.000357835
																1.22186	0.000365701
																1.22712	0.000395281
																1.23239	0.000465964
																1.23766	0.000502864
																1.24292	0.00050149
																1.24819	0.000500117
																1.25345	0.000493909
																1.25872	0.000485114
																1.26399	0.00047507
																1.26925	0.000465026
																1.27452	0.000442627
																1.27979	0.000365039
																1.28505	0.000335113
																1.29032	0.000341654
																1.29558	0.000371453
																1.30085	0.000431891
																1.30612	0.000472308
																1.31138	0.000490859
																1.31665	0.000498494
																1.32191	0.000497851
																1.32718	0.000497208
																1.33245	0.00048499
																1.33771	0.000477229
																1.34298	0.000469468
																1.34824	0.000380998
																1.35351	0.000331882
																1.35878	0.000318137
																1.36404	0.000321109
																1.36931	0.000357163
																1.37457	0.00043708
																1.37984	0.00044104
																1.38511	0.000440714
																1.39037	0.000440389
																1.39564	0.000420478
																1.4009	0.000404746
																1.40617	0.000397018
																1.41144	0.000389291
																1.4167	0.000315521
																1.42197	0.00024527
																1.42723	0.000213317
																1.4325	0.000223765
																1.43777	0.000260884
																1.44303	0.000318555
																1.4483	0.000342266
																1.45356	0.000349283
																1.45883	0.000333698
																1.4641	0.000318112
																1.46936	0.000310548
																1.47463	0.00029825
																1.47989	0.000285951
																1.48516	0.000256469
																1.49043	0.000174947
																1.49569	0.000128359
																1.50096	0.000128413
																1.50622	0.000158594
																1.51149	0.000211852
																1.51676	0.000292347
																1.52202	0.000284988
																1.52729	0.000277628
																1.53255	0.000261567
																1.53782	0.000252625
																1.54309	0.000263894
																1.54835	0.000267556
																1.55362	0.000230072
																1.55888	0.000192587
																1.56415	0.000138622
																1.56942	0.000144838
																1.57468	0.000181042
																1.57995	0.000222417
																1.58521	0.000292596
																1.59048	0.000299218
																1.59575	0.000301674
																1.60101	0.000303086
																1.60628	0.000301213
																1.61154	0.000299339
																1.61681	0.000287603
																1.62208	0.000275867
																1.62734	0.000242849
																1.63261	0.000165946
																1.63788	0.000154109
																1.64314	0.000192989
																1.64841	0.000230303
																1.65367	0.000289543
																1.65894	0.000311378
																1.66421	0.000321465
																1.66947	0.000320045
																1.67474	0.000318624
																1.68	0.000292207
																1.68527	0.000280724
																1.69054	0.00026924
																1.6958	0.000242321
																1.70107	0.000171988
																1.70633	0.000141178
																1.7116	0.000164154
																1.71687	0.000193844
																1.72213	0.000249047
																1.7274	0.000323185
																1.73266	0.000338049
																1.73793	0.000344376
																1.7432	0.000340866
																1.74846	0.000337356
																1.75373	0.000360948
																1.75899	0.000344285
																1.76426	0.000327622
																1.76953	0.000292989
																1.77479	0.000238578
																1.78006	0.000252138
																1.78532	0.000297223
																1.79059	0.000353512
																1.79586	0.000426284
																1.80112	0.000446952
																1.80639	0.000457125
																1.81165	0.000458416
																1.81692	0.000458456
																1.82219	0.000458496
																1.82745	0.00044666
																1.83272	0.000434823
																1.83798	0.000401529
																1.84325	0.000334636
																1.84852	0.000330486
																1.85378	0.000377025
																1.85905	0.000410429
																1.86431	0.000479044
																1.86958	0.00051861
																1.87485	0.000536161
																1.88011	0.000537214
																1.88538	0.000530578
																1.89064	0.000523943
																1.89591	0.000528771
																1.90118	0.00052181
																1.90644	0.000514849
																1.91171	0.000436945
																1.91697	0.00039014
																1.92224	0.000402189
																1.92751	0.000448751
																1.93277	0.000505914
																1.93804	0.000572179
																1.9433	0.000579765
																1.94857	0.000575881
																1.95384	0.000571997
																1.9591	0.000563761
																1.96437	0.000576622
																1.96963	0.00056504
																1.9749	0.000553458
																1.98017	0.00052568
																1.98543	0.000491472
																1.9907	0.000495054
																1.99597	0.000526583
																2.00123	0.000589984
																2.0065	0.000665302
																2.01176	0.000680025
																2.01703	0.000684037
																2.0223	0.000682821
																2.02756	0.000681606
																2.03283	0.000690273
																2.03809	0.000689477
																2.04336	0.000688681
																2.04863	0.00066146
																2.05389	0.000595871
																2.05916	0.000585781
																2.06442	0.000625861
																2.06969	0.000676053
																2.07496	0.000744212
																2.08022	0.000807713
																2.08549	0.000809245
																2.09075	0.000809553
																2.09602	0.00080986
																2.10129	0.000812166
																2.10655	0.000815904
																2.11182	0.00080977
																2.11708	0.000803636
																2.12235	0.000717931
																2.12762	0.000692588
																2.13288	0.000726783
																2.13815	0.000764732
																2.14341	0.000816307
																2.14868	0.000845822
																2.15395	0.000859018
																2.15921	0.000865571
																2.16448	0.000863652
																2.16974	0.000861734
																2.17501	0.000857519
																2.18028	0.000852191
																2.18554	0.000846863
																2.19081	0.000764847
																2.19607	0.000729134
																2.20134	0.000750622
																2.20661	0.000771347
																2.21187	0.000821624
																2.21714	0.000904293
																2.2224	0.000910281
																2.22767	0.000911141
																2.23294	0.00091028
																2.2382	0.000909419
																2.24347	0.000906837
																2.24873	0.00089106
																2.254	0.000875283
																2.25927	0.000837514
																2.26453	0.000775137
																2.2698	0.000771366
																2.27506	0.000790968
																2.28033	0.000826365
																2.2856	0.000896892
																2.29086	0.000952316
																2.29613	0.00095603
																2.30139	0.000959743
																2.30666	0.000960203
																2.31193	0.000960663
																2.31719	0.000946433
																2.32246	0.000932202
																2.32772	0.000901038
																2.33299	0.000825163
																2.33826	0.000781075
																2.34352	0.000798244
																2.34879	0.000834802
																2.35406	0.000895348
																2.35932	0.00092267
																2.36459	0.000922449
																2.36985	0.000922229
																2.37512	0.000917452
																2.38039	0.000902531
																2.38565	0.000902964
																2.39092	0.00087581
																2.39618	0.000848656
																2.40145	0.000760114
																2.40672	0.000699767
																2.41198	0.000703654
																2.41725	0.000742952
																2.42251	0.000796976
																2.42778	0.000829337
																2.43305	0.000842684
																2.43831	0.000842762
																2.44358	0.00084284
																2.44884	0.000843482
																2.45411	0.000842553
																2.45938	0.000841623
																2.46464	0.000839122
																2.46991	0.000772667
																2.47517	0.000725444
																2.48044	0.000711334
																2.48571	0.000732081
																2.49097	0.000782763
																2.49624	0.000863603
																2.5015	0.000865505
																2.50677	0.000860049
																2.51204	0.000854593
																2.5173	0.000825051
																2.52257	0.000810209
																2.52783	0.000800154
																2.5331	0.00078156
																2.53837	0.000725193
																2.54363	0.000642903
																2.5489	0.00060631
																2.55416	0.000608305
																2.55943	0.000638038
																2.5647	0.00070203
																2.56996	0.000726037
																2.57523	0.00073069
																2.58049	0.000729575
																2.58576	0.000728459
																2.59103	0.000733194
																2.59629	0.000720234
																2.60156	0.000707275
																2.60682	0.000674747
																2.61209	0.000585346
																2.61736	0.000547408
																2.62262	0.00055047
																2.62789	0.000578014
																2.63315	0.000617239
																2.63842	0.000642555
																2.64369	0.000654137
																2.64895	0.000647595
																2.65422	0.000641053
																2.65948	0.000622234
																2.66475	0.000613846
																2.67002	0.000610241
																2.67528	0.000574738
																2.68055	0.000497772
																2.68581	0.000446811
																2.69108	0.000433186
																2.69635	0.000443792
																2.70161	0.000478537
																2.70688	0.000538682
																2.71214	0.000542526
																2.71741	0.000540424
																2.72268	0.000538323
																2.72794	0.000513563
																2.73321	0.000516144
																2.73848	0.00050483
																2.74374	0.000493515
																2.74901	0.000463682
																2.75427	0.000385797
																2.75954	0.000355379
																2.76481	0.000364017
																2.77007	0.000391643
																2.77534	0.000442547
																2.7806	0.000471271
																2.78587	0.000480482
																2.79114	0.000476061
																2.7964	0.000471639
																2.80167	0.00046177
																2.80693	0.000446325
																2.8122	0.000430881
																2.81747	0.000397479
																2.82273	0.000308063
																2.828	0.00027202
																2.83326	0.000276906
																2.83853	0.000311074
																2.8438	0.000364044
																2.84906	0.000392393
																2.85433	0.000405614
																2.85959	0.000400564
																2.86486	0.000395515
																2.87013	0.000379316
																2.87539	0.000372651
																2.88066	0.000356871
																2.88592	0.00034109
																2.89119	0.000240308
																2.89646	0.000165015
																2.90172	0.000146971
																2.90699	0.000181314
																2.91225	0.000230584
																2.91752	0.000287489
																2.92279	0.000287807
																2.92805	0.000288126
																2.93332	0.000280844
																2.93858	0.000262192
																2.94385	0.000239333
																2.94912	0.00022277
																2.95438	0.000206208
																2.95965	0.000170526
																2.96491	8.54625e-05
																2.97018	7.03964e-05
																2.97545	9.49655e-05
																2.98071	0.000126245
																2.98598	0.000204048
																2.99124	0.000238807
																2.99651	0.000249822
																3.00178	0.000237552
																3.00704	0.000225282
																3.01231	0.00021596
																3.01757	0.000211927
																3.02284	0.000207893
																3.02811	0.000175011
																3.03337	8.15743e-05
																3.03864	4.36633e-05
																3.0439	5.13316e-05
																3.04917	7.19275e-05
																3.05444	0.000106728
																3.0597	0.000128886
																3.06497	0.000135811
																3.07023	0.000130373
																3.0755	0.000124935
																3.08077	9.99605e-05
																3.08603	9.54652e-05
																3.0913	9.09699e-05
																3.09657	7.78973e-05
																3.10183	-2.12387e-05
																3.1071	-7.93591e-05
																3.11236	-6.94812e-05
																3.11763	-4.90295e-05
																3.1229	-9.21397e-06
																3.12816	6.13069e-05
																3.13343	5.96833e-05
																3.13869	5.80597e-05
																3.14396	4.67921e-05
																3.14923	2.10816e-05
																3.15449	1.84059e-05
																3.15976	4.83374e-06
																3.16502	-8.73844e-06
																3.17029	-4.52458e-05
																3.17556	-0.000121485
																3.18082	-0.000140013
																3.18609	-0.000123512
																3.19135	-9.86725e-05
																3.19662	-5.35961e-05
																3.20189	-4.92306e-05
																3.20715	-5.21819e-05
																3.21242	-5.51332e-05
																3.21768	-8.32222e-05
																3.22295	-9.41608e-05
																3.22822	-0.000103279
																3.23348	-0.000112397
																3.23875	-0.000144097
																3.24401	-0.000243223
																3.24928	-0.000289376
																3.25455	-0.000262112
																3.25981	-0.000230263
																3.26508	-0.00018197
																3.27034	-0.000150854
																3.27561	-0.000136738
																3.28088	-0.000132662
																3.28614	-0.000137818
																3.29141	-0.000142973
																3.29667	-0.000144039
																3.30194	-0.000146817
																3.30721	-0.000149595
																3.31247	-0.000231884
																3.31774	-0.000285523
																3.323	-0.000287132
																3.32827	-0.000259731
																3.33354	-0.000228809
																3.3388	-0.000180281
																3.34407	-0.000179928
																3.34933	-0.000179576
																3.3546	-0.000185146
																3.35987	-0.00020118
																3.36513	-0.000221469
																3.3704	-0.000221695
																3.37566	-0.000242419
																3.38093	-0.00031532
																3.3862	-0.000382279
																3.39146	-0.000410087
																3.39673	-0.000389882
																3.40199	-0.000340332
																3.40726	-0.00027291
																3.41253	-0.000249273
																3.41779	-0.000251731
																3.42306	-0.000254189
																3.42832	-0.000261937
																3.43359	-0.000277791
																3.43886	-0.000291936
																3.44412	-0.000306081
																3.44939	-0.000339499
																3.45466	-0.000437493
																3.45992	-0.000485619
																3.46519	-0.000477124
																3.47045	-0.00044735
																3.47572	-0.000400993
																3.48099	-0.000376175
																3.48625	-0.000366414
																3.49152	-0.000371701
																3.49678	-0.000376989
																3.50205	-0.0003813
																3.50732	-0.000380246
																3.51258	-0.000386776
																3.51785	-0.000393305
																3.52311	-0.000470808
																3.52838	-0.00052878
																3.53365	-0.000527538
																3.53891	-0.000498785
																3.54418	-0.000457383
																3.54944	-0.000432332
																3.55471	-0.000420466
																3.55998	-0.000423406
																3.56524	-0.000426347
																3.57051	-0.000443235
																3.57577	-0.000455329
																3.58104	-0.000465748
																3.58631	-0.000476167
																3.59157	-0.000552762
																3.59684	-0.000621459
																3.6021	-0.000632709
																3.60737	-0.000604062
																3.61264	-0.000570125
																3.6179	-0.000504502
																3.62317	-0.000476103
																3.62843	-0.000463299
																3.6337	-0.000462053
																3.63897	-0.000461965
																3.64423	-0.000461877
																3.6495	-0.000460396
																3.65476	-0.000469193
																3.66003	-0.000477989
																3.6653	-0.000558949
																3.67056	-0.000573106
																3.67583	-0.000555987
																3.68109	-0.000518539
																3.68636	-0.000444786
																3.69163	-0.00041644
																3.69689	-0.000420187
																3.70216	-0.000423934
																3.70742	-0.000432388
																3.71269	-0.000436567
																3.71796	-0.000440486
																3.72322	-0.000444404
																3.72849	-0.000460731
																3.73375	-0.000546474
																3.73902	-0.000603929
																3.74429	-0.000611278
																3.74955	-0.000585167
																3.75482	-0.000506892
																3.76008	-0.000488317
																3.76535	-0.000479968
																3.77062	-0.000479482
																3.77588	-0.000481838
																3.78115	-0.000484195
																3.78641	-0.000501971
																3.79168	-0.000515766
																3.79695	-0.00052956
																3.80221	-0.000616058
																3.80748	-0.000680425
																3.81275	-0.000684715
																3.81801	-0.000656812
																3.82328	-0.000608149
																3.82854	-0.000528808
																3.83381	-0.000481569
																3.83908	-0.000481867
																3.84434	-0.000482165
																3.84961	-0.000483794
																3.85487	-0.000467058
																3.86014	-0.000453182
																3.86541	-0.000450607
																3.87067	-0.000480467
																3.87594	-0.000510327
																3.8812	-0.000518793
																3.88647	-0.000499254
																3.89174	-0.000458514
																3.897	-0.000375756
																3.90227	-0.000287378
																3.90753	-0.000278229
																3.9128	-0.000274338
																3.91807	-0.000270448
																3.92333	-0.000266809
																3.9286	-0.000272011
																3.93386	-0.000277212
																3.93913	-0.000301468
																3.9444	-0.000377304
																3.94966	-0.000423132
																3.95493	-0.000425778
																3.96019	-0.000395562
																3.96546	-0.000347172
																3.97073	-0.000316759
																3.97599	-0.000306081
																3.98126	-0.000318844
																3.98652	-0.000331606
																3.99179	-0.000363287
																3.99706	-0.000367303
																4.00232	-0.000369061
																4.00759	-0.000370819
																4.01285	-0.000459671
																4.01812	-0.000525768
																4.02339	-0.00053249
																4.02865	-0.00051192
																4.03392	-0.000459626
																4.03918	-0.000389806
																4.04445	-0.000381262
																4.04972	-0.000378863
																4.05498	-0.000383146
																4.06025	-0.00038743
																4.06551	-0.00037943
																4.07078	-0.000390244
																4.07605	-0.000401057
																4.08131	-0.000433054
																4.08658	-0.00049222
																4.09184	-0.000504146
																4.09711	-0.00046732
																4.10238	-0.000421908
																4.10764	-0.000357851
																4.11291	-0.000283622
																4.11817	-0.00028275
																4.12344	-0.000281877
																4.12871	-0.000278995
																4.13397	-0.000278084
																4.13924	-0.00027784
																4.1445	-0.000277597
																4.14977	-0.000292637
																4.15504	-0.000386828
																4.1603	-0.000415071
																4.16557	-0.000403359
																4.17084	-0.000382515
																4.1761	-0.000332173
																4.18137	-0.000253761
																4.18663	-0.00025049
																4.1919	-0.000251844
																4.19717	-0.000253199
																4.20243	-0.000264287
																4.2077	-0.000256199
																4.21296	-0.000252576
																4.21823	-0.000294184
																4.2235	-0.000335793
																4.22876	-0.000389405
																4.23403	-0.000381318
																4.23929	-0.000348957
																4.24456	-0.000310521
																4.24983	-0.000242296
																4.25509	-0.000221849
																4.26036	-0.000215845
																4.26562	-0.00020984
																4.27089	-0.000201926
																4.27616	-0.000203285
																4.28142	-0.000204645
																4.28669	-0.000209229
																4.29195	-0.00027523
																4.29722	-0.00034549
																4.30249	-0.000348323
																4.30775	-0.000307149
																4.31302	-0.000265037
																4.31828	-0.000197824
																4.32355	-0.000172331
																4.32882	-0.000163235
																4.33408	-0.000159233
																4.33935	-0.000155231
																4.34461	-0.000144847
																4.34988	-0.000140747
																4.35515	-0.000144913
																4.36041	-0.000149079
																4.36568	-0.00024506
																4.37094	-0.000287214
																4.37621	-0.000263286
																4.38148	-0.00023017
																4.38674	-0.000185335
																4.39201	-0.000155436
																4.39727	-0.000140701
																4.40254	-0.000151488
																4.40781	-0.000162275
																4.41307	-0.000186886
																4.41834	-0.00018952
																4.4236	-0.000192154
																4.42887	-0.000201398
																4.43414	-0.000300753
																4.4394	-0.000359386
																4.44467	-0.000358874
																4.44993	-0.000327699
																4.4552	-0.000287249
																4.46047	-0.000231615
																4.46573	-0.000215558
																4.471	-0.000222556
																4.47626	-0.000229554
																4.48153	-0.000245135
																4.4868	-0.000257971
																4.49206	-0.000276034
																4.49733	-0.000294097
																4.50259	-0.000336307
																4.50786	-0.00042635
																4.51313	-0.000444804
																4.51839	-0.000413949
																4.52366	-0.00037547
																4.52893	-0.000337853
																4.53419	-0.00032082
																4.53946	-0.000314746
																4.54472	-0.000313357
																4.54999	-0.00031431
																4.55526	-0.000315264
																4.56052	-0.000322898
																4.56579	-0.000330532
																4.57105	-0.000346712
																4.57632	-0.000427947
																4.58159	-0.00045178
																4.58685	-0.00042832
																4.59212	-0.000376309
																4.59738	-0.000295752
																4.60265	-0.000240155
																4.60792	-0.000233076
																4.61318	-0.000232119
																4.61845	-0.000231769
																4.62371	-0.00023142
																4.62898	-0.000228398
																4.63425	-0.000226824
																4.63951	-0.000260284
																4.64478	-0.000293744
																4.65004	-0.000349505
																4.65531	-0.000354
																4.66058	-0.000317632
																4.66584	-0.000263884
																4.67111	-0.00019899
																4.67637	-0.00019981
																4.68164	-0.00020063
																4.68691	-0.000207895
																4.69217	-0.000207131
																4.69744	-0.000205611
																4.7027	-0.000222804
																4.70797	-0.000239998
																4.71324	-0.000276067
																4.7185	-0.000349372
																4.72377	-0.000355824
																4.72903	-0.000325401
																4.7343	-0.000280348
																4.73957	-0.000207874
																4.74483	-0.000176431
																4.7501	-0.000165999
																4.75536	-0.000166279
																4.76063	-0.000166559
																4.7659	-0.000171919
																4.77116	-0.000177969
																4.77643	-0.000184018
																4.78169	-0.000204223
																4.78696	-0.000275188
																4.79223	-0.000319964
																4.79749	-0.000296652
																4.80276	-0.000238657
																4.80802	-0.000180513
																4.81329	-0.000155819
																4.81856	-0.000147679
																4.82382	-0.000146478
																4.82909	-0.000145277
																4.83435	-0.000132874
																4.83962	-0.0001386
																4.84489	-0.000144325
																4.85015	-0.00016276
																4.85542	-0.000246314
																4.86068	-0.000302446
																4.86595	-0.000305249
																4.87122	-0.00026986
																4.87648	-0.000209174
																4.88175	-0.000131324
																4.88702	-0.000120331
																4.89228	-0.000109337
																4.89755	-0.000101754
																4.90281	-9.23274e-05
																4.90808	-8.17888e-05
																4.91335	-9.34077e-05
																4.91861	-0.000105027
																4.92388	-0.000138368
																4.92914	-0.000205604
																4.93441	-0.000220395
																4.93968	-0.000189661
																4.94494	-0.000127777
																4.95021	-3.81501e-05
																4.95547	-2.45302e-05
																4.96074	-1.77974e-05
																4.96601	-1.10645e-05
																4.97127	-7.34166e-06
																4.97654	8.54805e-06
																4.9818	1.49806e-05
																4.98707	8.86651e-06
																4.99234	2.75238e-06
																4.9976	-5.08109e-05
																5.00287	-9.14205e-05
																5.00813	-7.98956e-05
																5.0134	-4.04643e-05
																5.01867	1.3038e-05
																5.02393	3.64364e-05
																5.0292	4.19804e-05
																5.03446	3.52508e-05
																5.03973	2.85211e-05
																5.045	2.9654e-05
																5.05026	2.98045e-05
																5.05553	2.99551e-05
																5.06079	-1.79366e-05
																5.06606	-9.91996e-05
																5.07133	-0.000145547
																5.07659	-0.000133419
																5.08186	-8.60215e-05
																5.08712	-2.49568e-05
																5.09239	4.56802e-05
																5.09766	4.79023e-05
																5.10292	4.87711e-05
																5.10819	4.7332e-05
																5.11345	4.5893e-05
																5.11872	4.2146e-05
																5.12399	3.11156e-05
																5.12925	2.00851e-05
																5.13452	-5.88125e-05
																5.13978	-0.000125099
																5.14505	-0.000145542
																5.15032	-0.000122084
																5.15558	-9.41946e-05
																5.16085	-1.82075e-05
																5.16611	-1.52995e-05
																5.17138	-1.97546e-05
																5.17665	-2.42096e-05
																5.18191	-2.8942e-05
																5.18718	-2.98664e-05
																5.19244	-4.17124e-05
																5.19771	-5.35583e-05
																5.20298	-7.83909e-05
																5.20824	-0.000147994
																5.21351	-0.000175783
																5.21877	-0.000141291
																5.22404	-0.000111439
																5.22931	-3.97307e-05
																5.23457	-7.33186e-06
																5.23984	6.95534e-07
																5.24511	-3.09507e-06
																5.25037	-6.88568e-06
																5.25564	-1.00541e-05
																5.2609	-1.48942e-05
																5.26617	-1.97343e-05
																5.27144	-3.97362e-05
																5.2767	-0.000121083
																5.28197	-0.000161992
																5.28723	-0.000150558
																5.2925	-0.000113208
																5.29777	-5.68603e-05
																5.30303	-2.04527e-05
																5.3083	-4.17451e-06
																5.31356	-2.99328e-06
																5.31883	-5.13161e-06
																5.3241	-7.26995e-06
																5.32936	-1.27279e-05
																5.33463	-2.7834e-05
																5.33989	-4.29402e-05
																5.34516	-0.00013239
																5.35043	-0.000201842
																5.35569	-0.000227302
																5.36096	-0.00020863
																5.36622	-0.000173416
																5.37149	-0.000109404
																5.37676	-0.000103331
																5.38202	-0.000102989
																5.38729	-0.000102646
																5.39255	-0.000124017
																5.39782	-0.000131038
																5.40309	-0.000133255
																5.40835	-0.000135472
																5.41362	-0.000222553
																5.41888	-0.000296835
																5.42415	-0.00031404
																5.42942	-0.000293195
																5.43468	-0.000250313
																5.43995	-0.000184887
																5.44521	-0.000156673
																5.45048	-0.000149637
																5.45575	-0.000154382
																5.46101	-0.000159127
																5.46628	-0.000154686
																5.47154	-0.000145377
																5.47681	-0.00015025
																5.48208	-0.000155123
																5.48734	-0.000252199
																5.49261	-0.000289953
																5.49787	-0.000255356
																5.50314	-0.000219703
																5.50841	-0.000164214
																5.51367	-0.000127875
																5.51894	-0.000112794
																5.5242	-0.000117568
																5.52947	-0.000122343
																5.53474	-0.000125154
																5.54	-0.000127712
																5.54527	-0.000130271
																5.55053	-0.000141621
																5.5558	-0.000230602
																5.56107	-0.000293127
																5.56633	-0.000311261
																5.5716	-0.00029648
																5.57686	-0.00026621
																5.58213	-0.000204644
																5.5874	-0.00019722
																5.59266	-0.000194665
																5.59793	-0.000198234
																5.6032	-0.000201804
																5.60846	-0.000193663
																5.61373	-0.000204367
																5.61899	-0.000215072
																5.62426	-0.000245277
																5.62953	-0.000312693
																5.63479	-0.000310956
																5.64006	-0.000272311
																5.64532	-0.000228745
																5.65059	-0.000167121
																5.65586	-0.000135586
																5.66112	-0.000121798
																5.66639	-0.000117476
																5.67165	-0.000121197
																5.67692	-0.000124918
																5.68219	-0.000131408
																5.68745	-0.000137897
																5.69272	-0.00016131
																5.69798	-0.000241423
																5.70325	-0.00028923
																5.70852	-0.000272086
																5.71378	-0.00023437
																5.71905	-0.000185783
																5.72431	-0.000153976
																5.72958	-0.000139678
																5.73485	-0.00013385
																5.74011	-0.000132257
																5.74538	-0.000130664
																5.75064	-0.000120052
																5.75591	-0.000134456
																5.76118	-0.00014886
																5.76644	-0.000178908
																5.77171	-0.000217998
																5.77697	-0.000206931
																5.78224	-0.000150636
																5.78751	-8.4611e-05
																5.79277	7.94493e-06
																5.79804	2.34166e-05
																5.8033	2.5575e-05
																5.80857	2.77334e-05
																5.81384	3.00232e-05
																5.8191	3.23129e-05
																5.82437	2.22799e-05
																5.82963	1.22469e-05
																5.8349	-1.91879e-05
																5.84017	-8.61812e-05
																5.84543	-0.00010958
																5.8507	-8.01893e-05
																5.85596	-4.62265e-05
																5.86123	2.98974e-05
																5.8665	6.32485e-05
																5.87176	7.79802e-05
																5.87703	7.809e-05
																5.88229	7.81998e-05
																5.88756	5.56399e-05
																5.89283	5.43488e-05
																5.89809	5.30576e-05
																5.90336	4.44122e-05
																5.90862	-3.85167e-05
																5.91389	-7.59668e-05
																5.91916	-4.63044e-05
																5.92442	1.85677e-05
																5.92969	8.11799e-05
																5.93495	0.000148015
																5.94022	0.000153375
																5.94549	0.000154819
																5.95075	0.000148804
																5.95602	0.000142788
																5.96129	0.000143067
																5.96655	0.000143345
																5.97182	0.000139016
																5.97708	6.23043e-05
																5.98235	1.91621e-05
																5.98762	1.52344e-05
																5.99288	4.55286e-05
																5.99815	0.000105231
																6.00341	0.000177595
																6.00868	0.000188374
																6.01395	0.000188959
																6.01921	0.000189241
																6.02448	0.000189523
																6.02974	0.000191615
																6.03501	0.000198257
																6.04028	0.000192683
																6.04554	0.00018711
																6.05081	0.000142974
																6.05607	0.000140744
																6.06134	0.000182054
																6.06661	0.000244376
																6.07187	0.000335644
																6.07714	0.000371297
																6.0824	0.000388102
																6.08767	0.000404908
																6.09294	0.000406515
																6.0982	0.000420145
																6.10347	0.000427066
																6.10873	0.000422058
																6.114	0.000417049
																6.11927	0.000331324
																6.12453	0.000300734
																6.1298	0.0003276
																6.13506	0.00036644
																6.14033	0.000418864
																6.1456	0.000443715
																6.15086	0.000453043
																6.15613	0.000450848
																6.16139	0.000448653
																6.16666	0.000446877
																6.17193	0.000452574
																6.17719	0.000455506
																6.18246	0.000421141
																6.18772	0.000386777
																6.19299	0.000341696
																6.19826	0.000349669
																6.20352	0.000391192
																6.20879	0.000453676
																6.21405	0.000528239
																6.21932	0.000533046
																6.22459	0.000537854
																6.22985	0.000539666
																6.23512	0.000560265
																6.24038	0.000555287
																6.24565	0.000550308
																6.25092	0.000538244
																6.25618	0.000449219
																6.26145	0.000397665
																6.26671	0.000389315
																6.27198	0.000403195
																6.27725	0.000448983
																6.28251	0.000515878
																6.28778	0.00051563
																6.29304	0.000515381
																6.29831	0.000502197
																6.30358	0.000489992
																6.30884	0.00048411
																6.31411	0.00048291
																6.31937	0.000478215
																6.32464	0.000416563
																6.32991	0.000347271
																6.33517	0.000306505
																6.34044	0.000300233
																6.34571	0.000329529
																6.35097	0.000408659
																6.35624	0.000446999
																6.3615	0.000449116
																6.36677	0.000448952
																6.37204	0.000448789
																6.3773	0.000444307
																6.38257	0.000438235
																6.38783	0.000432163
																6.3931	0.000417152
																6.39837	0.000332728
																6.40363	0.000278365
																6.4089	0.000274528
																6.41416	0.000305944
																6.41943	0.000355469
																6.4247	0.000388879
																6.42996	0.000401705
																6.43523	0.000393881
																6.44049	0.000386057
																6.44576	0.000369195
																6.45103	0.000366802
																6.45629	0.00036441
																6.46156	0.000356574
																6.46682	0.000271877
																6.47209	0.000208577
																6.47736	0.00017853
																6.48262	0.000187837
																6.48789	0.000216735
																6.49315	0.000274665
																6.49842	0.000273252
																6.50369	0.000271838
																6.50895	0.00025833
																6.51422	0.000258391
																6.51948	0.000258453
																6.52475	0.000254875
																6.53002	0.000239085
																6.53528	0.000152892
																6.54055	7.07876e-05
																6.54581	3.68202e-05
																6.55108	4.06709e-05
																6.55635	5.97947e-05
																6.56161	0.00010825
																6.56688	0.000120569
																6.57214	0.00012467
																6.57741	0.000124108
																6.58268	0.000123547
																6.58794	0.000122411
																6.59321	0.000118476
																6.59847	0.000114541
																6.60374	9.15807e-05
																6.60901	1.65819e-05
																6.61427	-8.20229e-06
																6.61954	6.4953e-06
																6.6248	3.33455e-05
																6.63007	8.84791e-05
																6.63534	0.000126537
																6.6406	0.000144203
																6.64587	0.000151606
																6.65113	0.00015072
																6.6564	0.000149834
																6.66167	0.000140407
																6.66693	0.000130367
																6.6722	0.000120326
																6.67746	4.0277e-05
																6.68273	-2.92875e-05
																6.688	-3.9438e-05
																6.69326	-2.16327e-05
																6.69853	1.20077e-05
																6.7038	8.96115e-05
																6.70906	0.000115871
																6.71433	0.000110869
																6.71959	0.000105867
																6.72486	9.52214e-05
																6.73013	0.000107268
																6.73539	8.99591e-05
																6.74066	7.26501e-05
																6.74592	3.37973e-05
																6.75119	-4.50668e-05
																6.75646	-6.35432e-05
																6.76172	-4.03229e-05
																6.76699	5.58895e-06
																6.77225	6.76494e-05
																6.77752	9.55155e-05
																6.78279	0.000106442
																6.78805	0.000101837
																6.79332	9.72327e-05
																6.79858	8.15843e-05
																6.80385	8.67314e-05
																6.80912	8.5189e-05
																6.81438	8.36466e-05
																6.81965	2.15898e-07
																6.82491	-4.80656e-05
																6.83018	-3.43614e-05
																6.83545	-5.47657e-06
																6.84071	5.40923e-05
																6.84598	0.000129698
																6.85124	0.000123256
																6.85651	0.000116813
																6.86178	0.00010096
																6.86704	9.19195e-05
																6.87231	0.000112063
																6.87757	9.75422e-05
																6.88284	8.30214e-05
																6.88811	5.02316e-05
																6.89337	-4.80231e-07
																6.89864	1.88617e-05
																6.9039	6.67252e-05
																6.90917	0.000120437
																6.91444	0.000197426
																6.9197	0.000224826
																6.92497	0.000235896
																6.93023	0.000233502
																6.9355	0.000231108
																6.94077	0.000229757
																6.94603	0.000227791
																6.9513	0.000225826
																6.95656	0.000193957
																6.96183	0.00011752
																6.9671	0.000110854
																6.97236	0.000142714
																6.97763	0.000181698
																6.98289	0.000242808
																6.98816	0.000319609
																6.99343	0.000322003
																6.99869	0.000324396
																7.00396	0.000327681
																7.00922	0.000330784
																7.01449	0.000335616
																7.01976	0.00033364
																7.02502	0.000331664
																7.03029	0.000258206
																7.03555	0.00022779
																7.04082	0.000251617
																7.04609	0.000298174
																7.05135	0.000365949
																7.05662	0.000446975
																7.06189	0.000463193
																7.06715	0.000460661
																7.07242	0.00045813
																7.07768	0.000452558
																7.08295	0.000469313
																7.08822	0.000457361
																7.09348	0.000445408
																7.09875	0.000414377
																7.10401	0.000372696
																7.10928	0.000380126
																7.11455	0.000424086
																7.11981	0.000491609
																7.12508	0.000571201
																7.13034	0.000621256
																7.13561	0.000645348
																7.14088	0.000654971
																7.14614	0.000659015
																7.15141	0.000687874
																7.15667	0.000707951
																7.16194	0.000712692
																7.16721	0.000685741
																7.17247	0.00065879
																7.17774	0.000650151
																7.183	0.000695054
																7.18827	0.000752821
																7.19354	0.000822699
																7.1988	0.000900858
																7.20407	0.000906145
																7.20933	0.000911432
																7.2146	0.000921171
																7.21987	0.000928265
																7.22513	0.000953325
																7.2304	0.00094046
																7.23566	0.000927595
																7.24093	0.000897294
																7.2462	0.00087308
																7.25146	0.00090098
																7.25673	0.000955242
																7.26199	0.00103892
																7.26726	0.00112342
																7.27253	0.0011254
																7.27779	0.00112738
																7.28306	0.00113081
																7.28832	0.00113424
																7.29359	0.0011353
																7.29886	0.00111948
																7.30412	0.00110367
																7.30939	0.00106693
																7.31465	0.00101358
																7.31992	0.00100871
																7.32519	0.00104712
																7.33045	0.00111342
																7.33572	0.00119012
																7.34098	0.0012033
																7.34625	0.00120852
																7.35152	0.00121374
																7.35678	0.00123104
																7.36205	0.00125201
																7.36731	0.00125138
																7.37258	0.00125075
																7.37785	0.00121774
																7.38311	0.0011598
																7.38838	0.0011594
																7.39364	0.00119493
																7.39891	0.00125207
																7.40418	0.00133013
																7.40944	0.00136064
																7.41471	0.00136299
																7.41998	0.00136251
																7.42524	0.00136202
																7.43051	0.00135376
																7.43577	0.0013576
																7.44104	0.00135372
																7.44631	0.00134984
																7.45157	0.0012716
																7.45684	0.00125379
																7.4621	0.00127446
																7.46737	0.0013054
																7.47264	0.00136744
																7.4779	0.00139531
																7.48317	0.00140336
																7.48843	0.00140448
																7.4937	0.00140506
																7.49897	0.00140564
																7.50423	0.00140045
																7.5095	0.00139525
																7.51476	0.00137711
																7.52003	0.00129352
																7.5253	0.0012326
																7.53056	0.00123379
																7.53583	0.00127405
																7.54109	0.00132792
																7.54636	0.00140554
																7.55163	0.00140869
																7.55689	0.00140764
																7.56216	0.00140659
																7.56742	0.00141861
																7.57269	0.00143267
																7.57796	0.00142085
																7.58322	0.00140903
																7.58849	0.00138053
																7.59375	0.0013268
																7.59902	0.00132758
																7.60429	0.00137124
																7.60955	0.00141331
																7.61482	0.00147017
																7.62008	0.00149227
																7.62535	0.00149203
																7.63062	0.00149179
																7.63588	0.00149025
																7.64115	0.00149152
																7.64641	0.00148754
																7.65168	0.00148355
																7.65695	0.00145513
																7.66221	0.00137659
																7.66748	0.00135933
																7.67274	0.00138387
																7.67801	0.0014201
																7.68328	0.00148486
																7.68854	0.00151936
																7.69381	0.00153484
																7.69907	0.00153579
																7.70434	0.00153214
																7.70961	0.00152849
																7.71487	0.00151324
																7.72014	0.00149799
																7.7254	0.00146612
																7.73067	0.00137179
																7.73594	0.00133055
																7.7412	0.00133042
																7.74647	0.00135464
																7.75173	0.00141283
																7.757	0.00143874
																7.76227	0.00144824
																7.76753	0.00143567
																7.7728	0.0014231
																7.77807	0.00141137
																7.78333	0.00140622
																7.7886	0.00138824
																7.79386	0.00137026
																7.79913	0.00133235
																7.8044	0.00125774
																7.80966	0.00123718
																7.81493	0.00127036
																7.82019	0.00131829
																7.82546	0.0013948
																7.83073	0.00145721
																7.83599	0.00146076
																7.84126	0.00146431
																7.84652	0.00147587
																7.85179	0.00149807
																7.85706	0.00154271
																7.86232	0.00154473
																7.86759	0.00154436
																7.87285	0.00154398
																7.87812	0.00157795
																7.88339	0.00166543
																7.88865	0.00176318
																7.89392	0.00188915
																7.89918	0.00204685
																7.90445	0.00213962
																7.90972	0.00220596
																7.91498	0.0022973
																7.92025	0.00241303
																7.92551	0.00255327
																7.93078	0.00271662
																7.93605	0.00283244
																7.94131	0.00294869
																7.94658	0.0030927
																7.95184	0.00329625
																7.95711	0.00351788
																7.96238	0.00380089
																7.96764	0.00412999
																7.97291	0.00443077
																7.97817	0.00471092
																7.98344	0.00499449
																7.98871	0.00528491
																7.99397	0.00559655
																7.99924	0.00597197
																8.0045	0.00631903
																8.00977	0.00665747
																8.01504	0.00701908
																8.0203	0.00747035
																8.02557	0.00791739
																8.03083	0.0084239
																8.0361	0.00896138
																8.04137	0.00955416
																8.04663	0.0100765
																8.0519	0.010617
																8.05716	0.0111456
																8.06243	0.0117168
																8.0677	0.0123713
																8.07296	0.0130302
																8.07823	0.0136295
																8.08349	0.0142542
																8.08876	0.0149765
																8.09403	0.0156975
																8.09929	0.0164772
																8.10456	0.0172653
																8.10982	0.0181329
																8.11509	0.0189419
																8.12036	0.0197761
																8.12562	0.0205795
																8.13089	0.0214442
																8.13616	0.0222856
																8.14142	0.0231481
																8.14669	0.0240921
																8.15195	0.0249436
																8.15722	0.0258942
																8.16249	0.0268093
																8.16775	0.0278305
																8.17302	0.0288306
																8.17828	0.0299284
																8.18355	0.0309569
																8.18882	0.0320422
																8.19408	0.0330502
																8.19935	0.0341268
																8.20461	0.0351752
																8.20988	0.0362381
																8.21515	0.037399
																8.22041	0.0385425
																8.22568	0.0396396
																8.23094	0.0407513
																8.23621	0.0419991
																8.24148	0.0431634
																8.24674	0.0444311
																8.25201	0.0456516
																8.25727	0.0469614
																8.26254	0.04815
																8.26781	0.0493289
																8.27307	0.0506308
																8.27834	0.0519619
																8.2836	0.0532567
																8.28887	0.0545299
																8.29414	0.0559088
																8.2994	0.0571932
																8.30467	0.0586145
																8.30993	0.0599334
																8.3152	0.0613945
																8.32047	0.0627804
																8.32573	0.0643027
																8.331	0.0656863
																8.33626	0.0671458
																8.34153	0.068542
																8.3468	0.0700709
																8.35206	0.0715297
																8.35733	0.0731089
																8.36259	0.074589
																8.36786	0.0761546
																8.37313	0.0776732
																8.37839	0.0792051
																8.38366	0.0808842
																8.38892	0.0825766
																8.39419	0.0842389
																8.39946	0.0858794
																8.40472	0.0876385
																8.40999	0.0892724
																8.41525	0.0910627
																8.42052	0.0928238
																8.42579	0.0947845
																8.43105	0.0966371
																8.43632	0.0984946
																8.44158	0.100545
																8.44685	0.102622
																8.45212	0.104636
																8.45738	0.10669
																8.46265	0.10905
																8.46791	0.111442
																8.47318	0.114029
																8.47845	0.116253
																8.48371	0.118736
																8.48898	0.121343
																8.49425	0.124317
																8.49951	0.126947
																8.50478	0.129896
																8.51004	0.13285
																8.51531	0.135966
																8.52058	0.138792
																8.52584	0.141896
																8.53111	0.144958
																8.53637	0.14832
																8.54164	0.151564
																8.54691	0.154768
																8.55217	0.158329
																8.55744	0.161974
																8.5627	0.165581
																8.56797	0.169337
																8.57324	0.173503
																8.5785	0.177327
																8.58377	0.181459
																8.58903	0.185476
																8.5943	0.189865
																8.59957	0.194026
																8.60483	0.198359
																8.6101	0.203177
																8.61536	0.207921
																8.62063	0.212452
																8.6259	0.217003
																8.63116	0.222108
																8.63643	0.227075
																8.64169	0.23286
																8.64696	0.238091
																8.65223	0.243488
																8.65749	0.248517
																8.66276	0.25407
																8.66802	0.259418
																8.67329	0.265669
																8.67856	0.271559
																8.68382	0.277442
																8.68909	0.282797
																8.69435	0.28858
																8.69962	0.294118
																8.70489	0.299657
																8.71015	0.305587
																8.71542	0.311817
																8.72068	0.317904
																8.72595	0.32383
																8.73122	0.329463
																8.73648	0.335086
																8.74175	0.341356
																8.74701	0.347131
																8.75228	0.353184
																8.75755	0.358742
																8.76281	0.364695
																8.76808	0.370118
																8.77334	0.375587
																8.77861	0.381721
																8.78388	0.387882
																8.78914	0.393484
																8.79441	0.398698
																8.79967	0.404257
																8.80494	0.409247
																8.81021	0.414636
																8.81547	0.419641
																8.82074	0.425199
																8.826	0.430157
																8.83127	0.435178
																8.83654	0.439695
																8.8418	0.444472
																8.84707	0.449074
																8.85234	0.453934
																8.8576	0.458138
																8.86287	0.462411
																8.86813	0.466366
																8.8734	0.470385
																8.87867	0.47405
																8.88393	0.477626
																8.8892	0.481441
																8.89446	0.484967
																8.89973	0.488145
																8.905	0.491172
																8.91026	0.494313
																8.91553	0.497141
																8.92079	0.500112
																8.92606	0.502712
																8.93133	0.505246
																8.93659	0.507453
																8.94186	0.509517
																8.94712	0.511573
																8.95239	0.513472
																8.95766	0.51518
																8.96292	0.516689
																8.96819	0.518174
																8.97345	0.519441
																8.97872	0.520711
																8.98399	0.521751
																8.98925	0.522732
																8.99452	0.523458
																8.99978	0.524087
																9.00505	0.524565
																9.01032	0.524963
																9.01558	0.525197
																9.02085	0.525157
																9.02611	0.525117
																9.03138	0.525023
																9.03665	0.524738
																9.04191	0.524334
																9.04718	0.523864
																9.05244	0.523298
																9.05771	0.522483
																9.06298	0.521518
																9.06824	0.520537
																9.07351	0.519521
																9.07877	0.518341
																9.08404	0.517159
																9.08931	0.515797
																9.09457	0.514354
																9.09984	0.512671
																9.1051	0.511029
																9.11037	0.50941
																9.11564	0.507601
																9.1209	0.505772
																9.12617	0.503884
																9.13143	0.501809
																9.1367	0.499512
																9.14197	0.497479
																9.14723	0.495263
																9.1525	0.493168
																9.15776	0.490873
																9.16303	0.488645
																9.1683	0.486068
																9.17356	0.483678
																9.17883	0.481146
																9.18409	0.478748
																9.18936	0.4762
																9.19463	0.473763
																9.19989	0.470959
																9.20516	0.468261
																9.21043	0.465559
																9.21569	0.463073
																9.22096	0.460613
																9.22622	0.457942
																9.23149	0.455289
																9.23676	0.452636
																9.24202	0.449958
																9.24729	0.447149
																9.25255	0.444632
																9.25782	0.441974
																9.26309	0.439465
																9.26835	0.436599
																9.27362	0.433871
																9.27888	0.431292
																9.28415	0.428622
																9.28942	0.425976
																9.29468	0.423398
																9.29995	0.420946
																9.30521	0.418303
																9.31048	0.415818
																9.31575	0.4132
																9.32101	0.410893
																9.32628	0.408439
																9.33154	0.406236
																9.33681	0.403742
																9.34208	0.401329
																9.34734	0.398861
																9.35261	0.396708
																9.35787	0.394502
																9.36314	0.392498
																9.36841	0.390274
																9.37367	0.388064
																9.37894	0.385754
																9.3842	0.383725
																9.38947	0.381789
																9.39474	0.37979
																9.4	0.378051
																9.40527	0.376134
																9.41053	0.374182
																9.4158	0.372168
																9.42107	0.370424
																9.42633	0.368706
																9.4316	0.367109
																9.43686	0.365489
																9.44213	0.363972
																9.4474	0.3624
																9.45266	0.360684
																9.45793	0.359099
																9.46319	0.357646
																9.46846	0.356281
																9.47373	0.354798
																9.47899	0.353348
																9.48426	0.351736
																9.48952	0.350382
																9.49479	0.349058
																9.50006	0.347832
																9.50532	0.346582
																9.51059	0.345437
																9.51585	0.344158
																9.52112	0.342886
																9.52639	0.341622
																9.53165	0.34047
																9.53692	0.339294
																9.54218	0.338147
																9.54745	0.336742
																9.55272	0.335424
																9.55798	0.334261
																9.56325	0.333147
																9.56852	0.332171
																9.57378	0.331129
																9.57905	0.330174
																9.58431	0.329135
																9.58958	0.328075
																9.59485	0.326991
																9.60011	0.326008
																9.60538	0.325004
																9.61064	0.324104
																9.61591	0.323176
																9.62118	0.322028
																9.62644	0.3209
																9.63171	0.319942
																9.63697	0.319076
																9.64224	0.318131
																9.64751	0.317293
																9.65277	0.316369
																9.65804	0.31543
																9.6633	0.314417
																9.66857	0.313511
																9.67384	0.31258
																9.6791	0.311712
																9.68437	0.310785
																9.68963	0.309788
																9.6949	0.30871
																9.70017	0.307774
																9.70543	0.306932
																9.7107	0.30603
																9.71596	0.305208
																9.72123	0.304325
																9.7265	0.303415
																9.73176	0.302401
																9.73703	0.301492
																9.74229	0.30055
																9.74756	0.299676
																9.75283	0.298771
																9.75809	0.297829
																9.76336	0.296807
																9.76862	0.295739
																9.77389	0.29478
																9.77916	0.293931
																9.78442	0.293117
																9.78969	0.292229
																9.79495	0.291347
																9.80022	0.290323
																9.80549	0.28939
																9.81075	0.2884
																9.81602	0.287506
																9.82128	0.286583
																9.82655	0.285693
																9.83182	0.284617
																9.83708	0.283596
																9.84235	0.282599
																9.84761	0.281742
																9.85288	0.280895
																9.85815	0.28001
																9.86341	0.279117
																9.86868	0.278175
																9.87394	0.277229
																9.87921	0.276258
																9.88448	0.275372
																9.88974	0.274465
																9.89501	0.273608
																9.90027	0.272571
																9.90554	0.271586
																9.91081	0.270619
																9.91607	0.269798
																9.92134	0.268952
																9.92661	0.268167
																9.93187	0.267393
																9.93714	0.266242
																9.9424	0.264755
																9.94767	0.263604
																9.95294	0.262806
																9.9582	0.26195
																9.96347	0.261177
																9.96873	0.260266
																9.974	0.259357
																9.97927	0.258442
																9.98453	0.257691
																9.9898	0.256919
																9.99506	0.256237
																10.0003	0.255519
																10.0056	0.254799
																10.0109	0.253967
																10.0161	0.253226
																10.0214	0.25254
																10.0267	0.251802
																10.0319	0.251122
																10.0372	0.250457
																10.0425	0.249715
																10.0477	0.248913
																10.053	0.24828
																10.0583	0.247664
																10.0635	0.247098
																10.0688	0.24654
																10.0741	0.246045
																10.0793	0.245444
																10.0846	0.244856
																10.0899	0.244292
																10.0951	0.243792
																10.1004	0.243343
																10.1056	0.242855
																10.1109	0.242309
																10.1162	0.241779
																10.1214	0.241339
																10.1267	0.240938
																10.132	0.240618
																10.1372	0.240344
																10.1425	0.240094
																10.1478	0.239762
																10.153	0.239473
																10.1583	0.239222
																10.1636	0.239016
																10.1688	0.238826
																10.1741	0.238682
																10.1794	0.238498
																10.1846	0.238304
																10.1899	0.238165
																10.1952	0.238121
																10.2004	0.238126
																10.2057	0.238175
[truncated: 2,180 more rows]

## Sheet: Focus counting
WT	T1171I	T1171E	QT2	QT3	QT13	LC8 nonbinidng
85.2941	86.1538	51.6129	71.4286	68.0556	70.1493	51.7647
87.3016	72.7273	29.5455	81.0811	53.4247	53.4247	47.2527
81.1321	78.2609	55.4054	67.6923	44.4444	49.3151	41.8919
		51.8987			63.75
84.5759	79.0473	47.1156	73.4007	55.3082	59.1597	46.9698
3.14683	6.74775	11.8397	6.90881	11.9177	9.51575	4.94249
